# Supplementary material for: Time-resolved single-cell sequencing identifies multiple waves of mRNA decay during the mitosis-to-G1 phase transition
Source: eLife. 2022 Feb 1;11:e71356. doi: 10.7554/eLife.71356 (PMC8806192; doi:10.7554/eLife.71356)
Supplement: Source data 1. [file elife-71356-data1.csv]

GENEID	1	2	3	4	5	6	7	8	9	10	11	12	13	14	15	16	17	18	19	20	21	22	23	24	25	26	27	28	29	30	31	32	33	34	35	36	37	38	39	40	41	42	43	44	45	46	47	48	49
A1BG-AS1__chr19	0	0	0	0	0	0	0	0	0	0	0	0	0	0	0	0	0	0	0	0	0	0	0	0	0	0	0	0	0	0	0	0	0	0	0	0	0	0	0	0	0	0	0	0	0	0	0	0	0
A1BG__chr19	0	0	0	0	0	0	1	1	0	0	0	0	0	0	0	0	0	0	1	0	0	0	0	0	1	0	1	0	0	0	0	0	0	0	0	0	0	0	0	0	0	0	0	2	0	0	0	1	0
A1CF__chr10	0	0	0	0	0	0	0	0	0	0	0	0	0	0	0	0	0	0	0	0	0	1	0	0	0	0	0	0	0	0	0	0	0	0	0	0	0	0	0	0	0	0	0	0	0	0	0	0	0
A2M-AS1__chr12	0	0	0	0	0	0	0	0	0	0	0	0	0	0	0	0	0	0	0	0	0	0	0	0	0	0	0	0	0	0	0	0	0	0	0	0	0	0	0	0	0	0	0	0	0	0	0	0	0
A2ML1__chr12	0	0	0	0	0	0	0	0	0	0	0	0	0	0	0	0	0	0	0	0	0	0	0	0	0	0	0	0	0	0	0	0	0	0	0	0	0	0	1	0	0	0	0	0	0	0	0	0	0
A2M__chr12	0	0	0	0	0	0	0	0	0	0	0	0	0	0	0	0	0	0	0	0	0	0	0	0	0	0	0	0	0	0	0	0	0	0	0	0	0	0	0	0	0	0	0	0	0	0	0	0	0
A4GALT__chr22	0	0	0	0	0	0	0	0	0	0	0	0	0	0	1	1	0	0	0	0	0	0	0	0	0	0	0	0	0	0	0	2	0	0	0	0	0	0	0	0	0	0	1	0	0	0	0	0	0
AAAS__chr12	0	2	4	2	0	5	4	2	4	0	3	6	1	2	3	5	0	5	5	4	1	1	4	2	3	0	5	1	1	11.01	5	11.01	10.01	2	1	0	3	4	1	6	0	5	5	9.01	0	0	1	2	2
AACSP1__chr5	0	0	0	0	0	0	0	0	0	0	0	0	0	0	0	0	0	0	0	0	0	0	0	0	0	0	0	0	0	0	0	0	0	0	0	0	0	0	0	0	0	0	0	0	0	0	0	0	0
AACS__chr12	0	0	0	0	0	0	2	0	2	0	2	3	0	1	3	2	0	1	0	0	0	1	1	0	0	0	1	0	1	6	1	0	5	0	1	0	2	1	2	5	0	1	0	3	0	0	0	2	1
AADACL3__chr1	0	0	0	0	0	0	0	0	0	0	0	0	0	0	0	0	0	0	0	0	0	0	0	0	0	0	0	0	0	0	0	0	0	0	0	0	0	0	0	0	0	0	0	0	0	0	0	0	0
AADAC__chr3	0	0	0	0	0	0	0	0	0	0	0	0	0	0	0	0	0	0	0	0	0	0	0	0	0	0	0	0	0	0	0	0	0	0	0	0	0	0	0	0	0	0	0	0	0	0	0	0	0
AADAT__chr4	0	0	0	0	0	0	2	1	2	0	1	1	0	2	1	0	0	2	0	1	0	0	0	2	0	0	1	0	1	5	1	2	0	0	1	0	2	0	0	1	2	3	1	0	0	0	1	0	1
AAED1__chr9	0	0	0	1	0	1	1	0	0	0	0	1	1	1	0	0	0	0	0	1	0	1	0	0	1	0	0	0	0	0	0	0	0	0	1	2	0	0	1	1	1	0	0	0	0	0	0	0	0
AAGAB__chr15	0	1	3	0	0	1	1	0	0	0	2	3	1	1	4	0	1	3	0	1	0	0	0	2	0	1	2	1	1	2	2	1	0	1	0	2	0	2	4	2	0	2	2	2	0	0	0	0	1
AAK1__chr2	1	3	2	1	0	5	1	0	3	1	0	1	1	2	4	6	0	2	6	3	1	0	1	0	0	2	3	0	3	1	8.01	4	11.01	0	2	2	8.01	1	8.01	5	0	6	7.01	5	0	0	1	2	1
AAMDC__chr11	0	1	0	0	0	0	0	0	0	0	0	0	0	0	0	2	0	0	1	0	0	0	1	0	2	0	1	1	1	0	0	1	0	1	0	0	0	1	2	2	0	0	2	2	0	0	0	0	1
AAMP__chr2	2	1	1	2	0	6	1	2	1	0	4	2	2	0	3	3	0	2	1	2	0	1	0	0	0	1	4	3	0	3	3	3	4	0	3	1	1	2	12.02	3	3	2	2	6	0	0	0	1	0
AANAT__chr17	0	0	0	0	0	0	0	0	0	0	0	0	0	0	0	0	0	0	0	0	0	0	0	0	0	0	0	0	0	0	0	0	0	0	0	0	0	0	0	0	0	0	0	0	0	0	0	0	0
AAR2__chr20	2	2	2	2	0	3	2	0	1	0	2	2	0	1	3	1	0	4	0	0	1	0	1	0	1	0	3	0	0	2	4	2	2	0	1	2	0	1	1	0	1	2	2	1	1	0	0	3	4
AARD__chr8	0	0	0	0	0	0	0	0	0	0	0	0	0	0	1	0	0	0	0	0	0	0	0	0	0	0	0	0	0	0	1	0	0	0	0	0	0	0	0	0	0	0	0	0	0	0	0	0	0
AARS2__chr6	0	1	2	0	0	1	3	0	2	0	0	1	0	1	0	2	0	1	0	2	0	0	0	0	0	0	0	0	1	1	1	1	4	0	2	0	1	1	1	2	0	0	1	0	0	0	0	1	0
AARS__chr16	1	2	3	2	0	7.01	2	2	4	0	3	7.01	5	3	7.01	6	0	1	5	3	1	0	2	0	4	2	3	6	2	6	7.01	6	13.02	0	8.01	1	5	2	11.01	8.01	4	6	5	18.04	1	0	4	2	4
AASDHPPT__chr11	0	1	2	2	0	7.01	1	1	3	0	2	5	3	2	4	1	0	0	1	5	1	0	2	1	6	1	4	4	1	5	1	6	4	2	5	7.01	4	1	2	2	2	7.01	2	6	0	0	3	5	4
AASDH__chr4	0	0	0	0	0	0	0	0	1	0	0	0	1	1	0	1	0	0	0	0	0	0	0	0	0	0	0	0	0	0	2	1	3	0	2	1	1	0	2	2	0	1	0	1	0	0	1	0	0
AASS__chr7	1	2	0	1	0	0	0	1	2	0	1	3	0	0	2	1	1	1	3	0	0	0	0	0	2	2	1	1	0	1	4	7.01	4	0	1	3	2	5	2	2	1	3	3	0	0	0	3	1	1
AATF__chr17	1	0	0	1	0	4	5	0	3	0	1	3	0	2	8.01	1	0	5	0	0	0	1	3	0	1	2	3	0	1	2	9.01	7.01	3	0	2	0	3	2	3	3	3	8.01	3	3	1	0	0	2	0
ABCA10__chr17	0	0	0	0	0	0	0	0	0	0	0	0	0	0	0	0	0	0	0	0	0	0	0	0	0	0	1	0	0	0	0	0	0	0	0	0	0	0	0	0	0	0	0	1	0	0	0	1	0
ABCA11P__chr4	0	0	0	0	0	0	0	0	0	0	0	0	0	0	0	0	0	0	0	0	0	0	0	0	0	0	0	0	0	0	0	0	0	0	0	0	0	0	0	0	0	0	0	0	0	0	0	0	0
ABCA12__chr2	0	0	0	0	0	0	0	0	0	0	0	0	0	0	0	0	0	0	0	0	0	0	0	0	0	0	0	0	0	0	0	0	0	0	0	0	0	0	0	0	0	0	0	0	0	0	0	0	0
ABCA13__chr7	0	0	0	1	0	0	0	0	0	0	0	0	0	0	2	0	0	0	3	0	0	0	0	0	0	0	0	0	0	0	0	0	0	0	2	0	0	0	0	0	0	0	0	0	0	0	0	0	0
ABCA17P__chr16	0	0	0	0	0	0	0	0	0	0	0	0	0	1	0	0	0	0	0	0	0	0	0	0	0	0	0	0	0	0	0	0	0	0	0	0	0	0	0	1	0	0	0	0	0	0	0	0	0
ABCA1__chr9	1	1	0	0	0	0	0	2	1	0	0	0	0	0	1	0	0	0	0	0	0	0	0	0	0	0	0	0	0	0	0	0	0	0	3	0	0	1	0	0	0	0	0	0	0	0	0	0	0
ABCA2__chr9	0	0	0	0	0	0	0	0	0	0	0	0	0	0	1	0	0	0	0	0	1	0	0	0	0	0	0	0	0	0	0	3	0	0	0	0	0	0	0	1	0	0	0	0	1	0	0	0	0
ABCA3__chr16	0	0	0	0	0	0	0	0	0	0	0	0	0	0	1	0	0	0	0	0	0	0	0	0	0	1	0	0	0	0	0	1	1	0	0	0	0	0	0	0	0	0	0	0	0	0	0	0	0
ABCA5__chr17	0	0	0	0	0	0	0	0	0	0	0	0	0	0	0	0	0	0	0	0	0	0	0	0	0	0	0	0	0	0	0	0	0	0	0	0	0	0	0	0	0	0	0	0	0	0	0	0	0
ABCA6__chr17	0	0	0	0	0	0	0	0	0	0	0	0	0	0	0	0	0	0	0	0	0	0	0	0	0	0	0	1	0	0	0	0	0	0	0	0	0	0	0	0	0	0	0	0	0	0	0	0	0
ABCA7__chr19	0	0	0	0	0	0	0	1	0	0	0	1	0	0	0	0	0	0	0	0	0	0	0	0	1	0	0	0	0	0	0	0	0	0	0	0	0	0	0	0	0	0	0	0	0	0	1	0	0
ABCA9__chr17	0	0	0	0	0	0	0	0	0	0	0	1	0	0	0	1	0	0	0	0	0	0	1	0	0	0	0	0	0	0	0	0	0	0	0	0	0	0	0	0	0	0	0	0	0	0	0	0	0
ABCB10__chr1	0	0	0	0	0	0	0	0	1	0	3	4	0	2	2	0	0	1	0	0	0	0	0	0	0	1	3	0	0	5	4	2	1	1	1	2	3	2	2	1	2	2	4	0	0	0	1	1	0
ABCB5__chr7	0	0	0	0	0	0	0	0	0	0	0	0	0	0	0	0	0	0	0	0	0	0	0	0	0	0	0	0	0	0	0	0	0	0	0	0	0	0	0	0	0	0	0	0	0	0	0	0	0
ABCB6__chr2	0	1	1	0	0	0	2	1	0	0	0	2	3	0	2	0	0	0	1	0	0	0	0	0	0	0	0	1	0	1	0	1	0	0	0	0	0	0	0	0	0	0	2	0	0	0	0	0	1
ABCB7__chrX	0	0	0	0	0	0	0	0	0	0	0	1	1	2	1	0	0	1	1	0	0	0	0	0	0	0	0	1	0	1	0	0	1	0	0	0	0	1	0	0	0	1	0	0	0	0	0	0	1
ABCB8__chr7	0	0	1	0	0	0	1	0	0	0	1	2	1	0	1	1	0	0	0	0	0	0	1	0	0	0	0	0	0	3	1	2	0	1	3	1	0	1	1	2	2	1	0	2	0	0	0	0	1
ABCB9__chr12	0	1	0	0	0	0	0	1	0	0	1	2	0	1	0	0	0	0	0	0	0	0	0	0	0	3	0	0	1	1	4	0	1	0	1	0	1	1	0	0	0	2	1	0	0	0	0	0	0
ABCC10__chr6	0	2	0	0	0	1	0	1	4	0	0	0	0	0	0	1	0	1	2	0	1	0	0	0	1	0	2	1	1	0	3	2	1	0	0	2	1	0	4	1	0	0	0	1	0	0	0	1	0
ABCC13__chr21	0	0	0	0	0	0	0	0	0	0	0	0	0	0	0	0	0	0	0	0	0	0	0	0	0	0	0	0	0	0	0	0	0	0	0	0	0	0	0	0	0	0	0	0	0	0	0	0	0
ABCC1__chr16	0	0	0	0	0	0	0	0	2	0	0	2	2	2	0	2	0	0	1	0	0	0	1	0	1	0	1	1	0	4	3	1	2	0	1	0	1	0	4	0	0	0	0	2	0	0	0	0	1
ABCC2__chr10	0	0	0	0	0	0	0	0	0	0	0	0	0	0	0	0	0	0	0	0	0	0	0	0	0	0	0	0	0	0	0	0	0	0	0	0	0	0	0	0	0	0	0	0	0	0	0	0	0
ABCC3__chr17	0	0	0	0	0	0	0	0	0	0	0	0	0	0	0	0	0	0	0	0	0	0	0	0	0	0	1	1	0	0	0	1	0	0	0	0	0	1	0	0	0	0	0	0	0	0	0	0	0
ABCC4__chr13	4	0	0	1	0	1	0	2	1	0	1	4	0	2	6	0	0	0	0	1	1	0	1	0	2	0	2	0	1	8.01	6	2	2	3	7.01	0	0	0	2	4	1	1	0	5	0	0	1	1	3
ABCC5__chr3	1	0	0	0	0	1	0	0	0	0	1	1	0	1	2	1	0	1	0	0	0	0	2	1	0	0	1	1	0	1	0	0	0	0	0	0	1	1	0	1	2	1	1	0	0	0	1	1	0
ABCC9__chr12	0	1	0	1	0	0	0	0	0	0	0	0	0	0	0	0	0	0	0	0	0	0	0	0	0	0	0	0	0	0	0	0	1	0	1	0	0	0	0	0	0	0	0	0	0	0	0	0	0
ABCD1__chrX	0	0	0	0	0	0	2	1	0	0	0	0	0	0	0	0	0	0	0	0	0	0	0	0	0	0	1	0	0	1	1	0	0	0	0	0	1	1	0	0	0	1	0	0	0	0	0	0	0
ABCD3__chr1	1	2	2	2	0	1	2	2	4	0	1	7.01	0	2	2	2	0	3	1	1	0	0	0	0	2	2	4	4	3	9.01	4	6	5	0	4	1	1	2	6	4	2	1	2	6	0	0	4	3	5
ABCD4__chr14	1	0	0	1	0	1	1	0	0	0	2	0	0	0	0	1	0	1	1	0	1	0	1	1	0	1	0	0	0	3	0	1	3	0	2	1	1	0	0	1	0	0	1	0	0	0	0	1	2
ABCE1__chr4	2	1	10.01	8.01	0	10.01	9.01	0	9.01	0	3	21.05	4	10.01	4	4	0	5	11.01	5	4	2	4	2	6	7.01	13.02	15.03	3	25.07	11.01	20.05	10.01	8.01	14.02	15.03	15.03	6	21.05	18.04	6	14.02	8.01	11.01	0	1	10.01	6	24.07
ABCF1__chr6	2	3	2	1	0	0	2	0	5	0	2	3	0	2	3	10.01	0	2	2	1	0	0	2	0	11.01	1	3	1	2	6	8.01	6	1	1	5	1	12.02	3	10.01	5	0	6	3	8.01	0	1	1	2	2
ABCF2__chr7	5	2	6	0	0	4	5	1	5	1	4	4	4	2	3	4	0	4	3	1	2	0	2	3	1	3	9.01	3	0	7.01	2	5	3	1	3	4	2	6	10.01	4	1	2	2	5	0	0	1	0	1
ABCF3__chr3	1	1	1	0	0	2	0	1	0	0	0	2	0	0	2	1	0	1	2	0	0	0	0	1	1	2	1	0	1	1	2	2	4	0	1	0	0	0	3	3	0	0	0	1	0	0	0	1	1
ABCG1__chr21	0	0	0	0	0	0	0	0	0	0	0	0	0	0	0	0	0	0	0	0	0	0	0	0	0	0	0	0	0	0	0	0	0	0	0	0	0	0	0	0	0	0	0	0	0	0	0	0	0
ABCG2__chr4	1	1	0	0	0	0	0	0	0	0	0	0	0	1	0	1	0	0	0	0	0	0	0	0	0	0	0	0	0	2	1	0	0	0	0	0	0	0	0	0	0	0	0	0	1	0	0	2	1
ABCG4__chr11	0	0	0	0	0	0	0	0	0	0	0	0	0	0	0	0	0	0	0	0	0	0	0	0	0	0	0	0	0	0	0	0	0	0	0	0	0	0	0	0	0	0	0	0	0	0	0	0	0
ABHD10__chr3	0	3	1	1	0	1	1	1	2	0	2	0	1	0	1	2	0	0	0	1	0	0	3	0	0	0	0	0	3	6	3	4	3	0	4	4	3	0	1	0	2	1	1	3	1	0	3	4	2
ABHD11-AS1__chr7	0	0	0	0	0	0	0	0	0	0	0	0	0	0	0	0	0	0	0	0	0	0	0	0	0	0	0	0	0	0	0	0	0	0	0	0	0	0	0	0	0	0	0	0	0	0	0	0	0
ABHD11__chr7	0	2	0	0	0	0	0	0	2	0	0	1	0	2	0	0	0	2	0	0	0	0	0	0	1	0	2	2	0	1	3	3	3	1	2	0	0	1	4	4	1	0	0	3	0	0	1	0	0
ABHD12B__chr14	0	0	0	0	0	0	0	0	0	0	0	0	0	0	0	0	0	0	0	0	0	0	0	0	0	0	0	0	0	0	0	0	0	0	0	0	0	0	0	0	0	0	0	0	0	0	0	0	0
ABHD12__chr20	0	1	1	0	0	1	3	0	1	0	0	0	0	3	0	5	0	1	3	1	1	2	1	0	0	0	0	3	2	5	5	4	4	2	3	0	2	1	3	6	1	3	6	4	0	0	0	2	0
ABHD13__chr13	0	0	1	0	0	2	0	0	0	0	1	6	0	0	0	2	0	1	1	1	0	0	0	0	2	1	1	0	0	3	1	1	1	0	1	0	1	0	0	0	1	4	3	0	0	0	1	0	2
ABHD14A__chr3	0	0	0	0	0	0	2	1	1	0	0	1	2	0	1	0	0	0	0	1	0	0	0	0	0	0	3	0	0	0	2	1	2	0	0	2	0	0	4	1	0	0	0	1	0	0	0	0	2
ABHD14B__chr3	0	0	0	0	0	0	0	1	0	0	1	2	1	0	2	0	0	1	0	0	1	0	0	0	0	1	0	1	0	1	1	1	2	2	0	0	1	1	0	0	0	0	0	1	0	0	0	0	0
ABHD15__chr17	0	1	1	0	0	2	0	0	2	0	0	0	0	0	0	1	0	0	0	0	0	0	0	0	0	0	0	0	0	0	0	0	1	1	0	0	1	0	0	0	0	0	1	3	0	0	0	0	0
ABHD16A__chr6	1	2	0	1	0	1	0	1	0	0	0	3	1	1	1	2	0	1	1	0	1	0	1	0	1	3	2	0	1	4	3	0	0	1	4	0	3	1	5	3	5	1	1	2	0	0	1	2	3
ABHD2__chr15	2	2	3	2	0	4	2	4	11.01	1	4	6	3	1	2	4	0	4	9.01	3	1	0	2	1	3	1	5	3	1	7.01	9.01	3	4	0	3	4	2	1	5	5	3	9.01	3	8.01	0	0	1	5	1
ABHD3__chr18	0	0	0	0	0	0	0	0	0	0	0	1	0	1	0	0	0	0	1	0	0	0	0	0	0	0	0	1	0	0	0	0	0	0	0	0	0	0	0	1	0	0	1	0	0	0	0	0	0
ABHD4__chr14	1	2	0	2	0	1	3	4	1	0	0	3	0	2	2	0	0	0	0	0	0	0	0	0	2	0	1	6	1	1	0	3	6	0	1	0	4	3	10.01	4	1	7.01	0	3	0	0	2	1	3
ABHD5__chr3	2	1	2	0	0	2	5	0	3	0	5	6	1	6	10.01	1	0	4	1	1	0	0	1	0	1	2	6	3	3	5	9.01	5	1	0	6	1	5	3	5	3	2	3	2	5	0	0	2	0	2
ABHD6__chr3	0	0	0	0	0	0	0	0	0	0	0	0	0	1	0	0	0	0	0	0	0	0	0	0	0	0	0	1	0	1	0	1	0	0	0	0	0	0	1	1	0	0	0	1	0	0	0	0	1
ABHD8__chr19	0	0	0	0	0	1	0	0	2	0	0	0	1	0	0	0	0	1	0	0	0	0	1	0	0	2	0	0	0	2	0	0	0	0	0	0	0	1	0	0	0	2	0	0	0	0	0	0	0
ABI1__chr10	1	1	2	2	0	2	0	2	4	0	0	5	1	0	5	3	0	2	3	4	2	0	0	0	0	2	0	0	0	4	2	6	1	1	5	2	1	1	2	2	6	4	4	1	0	0	1	0	2
ABI2__chr2	8.01	0	5	0	0	12.02	1	1	11.01	0	2	9.01	2	5	6	3	0	3	6	4	3	1	0	2	2	2	7.01	1	5	15.03	6	11.01	6	6	2	6	6	4	10.01	12.02	8.01	7.01	4	6	0	0	3	5	5
ABI3BP__chr3	0	0	0	0	0	0	0	0	0	0	0	0	0	0	0	0	0	0	0	0	0	0	0	0	0	0	0	0	0	0	0	0	0	0	0	0	0	0	0	0	0	0	1	0	0	0	0	0	0
ABI3__chr17	0	0	0	0	0	0	0	0	0	0	0	0	0	0	0	0	0	0	0	0	0	0	0	0	0	0	0	0	0	0	0	0	0	0	0	0	1	0	0	0	0	0	0	0	0	0	0	0	0
ABL1__chr9	4	3	3	3	0	2	10.01	3	7.01	0	2	10.01	3	4	7.01	7.01	0	5	5	1	1	0	6	0	5	2	5	3	1	13.02	17.03	11.01	5	1	10.01	0	10.01	2	13.02	6	4	6	9.01	7.01	0	0	0	4	1
ABL2__chr1	5	1	11.01	3	0	13.02	8.01	0	13.02	1	3	11.01	3	4	6	12.02	0	8.01	16.03	1	3	0	2	1	3	1	5	3	3	12.02	24.07	26.08	20.05	9.01	17.03	11.01	8.01	4	17.03	20.05	2	13.02	13.02	11.01	0	0	2	13.02	8.01
ABLIM1__chr10	1	1	1	1	0	1	0	0	1	0	1	2	2	1	3	1	0	0	1	0	0	0	0	0	2	2	0	3	0	3	3	2	3	1	3	0	0	0	2	4	1	2	0	2	1	0	0	1	1
ABLIM3__chr5	1	2	2	0	0	1	1	0	0	0	3	6	0	4	1	2	0	3	2	0	0	1	0	0	0	2	0	1	0	4	6	2	0	1	2	0	1	0	6	5	0	3	1	0	0	0	1	1	2
ABRACL__chr6	0	1	6	2	0	3	1	1	2	0	1	5	2	6	8.01	5	0	5	7.01	2	1	0	3	1	4	2	3	3	1	10.01	8.01	6	7.01	4	7.01	9.01	7.01	6	5	4	4	6	6	4	0	0	4	5	8.01
ABRA__chr8	0	0	0	0	0	0	0	0	0	0	0	0	0	0	0	0	0	0	0	0	0	0	0	0	0	0	0	0	0	0	0	0	0	0	0	0	0	0	0	0	0	0	0	0	0	0	0	0	0
ABR__chr17	1	2	4	0	0	4	1	1	5	0	2	2	1	0	1	2	0	4	1	0	1	0	2	0	2	1	2	1	1	4	6	4	2	0	4	0	2	1	6	8.01	5	5	3	4	0	0	0	0	1
ABT1__chr6	0	1	1	0	0	0	3	0	0	0	0	1	0	1	0	1	0	0	2	0	0	0	0	0	1	0	0	0	1	4	1	0	3	2	1	2	1	0	2	3	1	1	1	1	0	0	2	0	1
ABTB1__chr3	0	0	0	0	0	0	0	0	0	0	0	0	0	0	0	0	0	0	0	0	0	0	0	0	1	0	1	0	0	0	1	1	1	0	0	0	0	0	0	0	0	0	0	0	0	0	0	0	0
ABTB2__chr11	0	0	0	0	0	0	1	0	0	0	0	0	0	0	0	0	0	0	1	0	0	0	0	0	1	0	1	0	0	2	1	0	0	0	1	1	1	1	0	0	0	0	0	1	0	0	1	0	1
ACAA1__chr3	0	0	1	0	0	0	1	0	1	0	0	2	1	2	1	1	0	3	1	0	0	0	0	0	0	2	1	0	0	0	5	2	2	0	3	0	2	0	2	0	1	1	1	2	0	0	1	2	1
ACAA2__chr18	2	2	2	0	0	0	4	0	1	0	3	2	3	4	1	0	0	3	1	1	0	0	1	0	2	2	3	3	2	6	2	2	4	0	6	4	2	4	3	1	5	5	4	3	0	0	2	4	2
ACACA__chr17	0	1	1	0	0	1	2	2	0	0	0	1	0	2	1	1	0	0	0	1	0	0	0	1	2	1	5	2	1	1	1	4	4	1	2	1	1	1	2	0	0	1	2	5	0	0	0	2	0
ACACB__chr12	0	0	0	0	0	0	0	0	0	0	0	0	0	0	0	0	0	0	0	0	0	0	0	0	0	0	0	1	0	0	0	0	0	0	0	0	0	0	0	0	0	0	0	0	0	0	0	0	0
ACAD10__chr12	0	0	0	0	0	0	0	0	1	0	0	0	0	0	1	1	0	0	1	0	0	0	0	0	1	0	0	0	1	2	0	0	0	0	1	0	0	1	2	0	0	0	1	4	0	0	0	0	0
ACAD8__chr11	1	0	0	1	0	0	0	0	0	0	0	1	0	2	0	0	0	0	1	0	0	0	0	0	1	0	1	1	1	1	0	0	1	0	1	0	1	0	0	0	1	1	2	0	0	0	0	0	0
ACAD9__chr3	0	0	0	0	0	1	2	0	2	0	0	2	3	0	3	5	0	1	2	1	0	0	0	0	1	3	0	2	1	3	5	5	3	0	1	1	1	2	2	3	0	3	6	2	1	0	0	0	1
ACADL__chr2	0	0	0	0	0	0	0	0	0	0	0	0	0	0	0	0	0	0	0	0	0	0	0	0	0	0	0	0	0	1	0	0	0	0	0	0	0	0	0	0	0	0	0	0	0	0	0	0	0
ACADM__chr1	0	1	3	1	0	1	0	0	2	0	1	6	0	1	4	0	0	1	3	0	0	0	0	1	1	0	1	2	0	4	2	3	1	1	1	1	1	1	4	2	2	1	1	2	0	0	2	1	1
ACADSB__chr10	0	1	0	0	0	2	0	2	1	0	0	3	0	1	3	2	0	2	1	2	0	0	0	0	2	1	1	1	1	1	0	1	1	1	1	0	3	1	0	3	0	1	1	1	0	0	0	0	4
ACADS__chr12	0	0	0	0	0	0	0	0	0	0	0	0	0	0	0	1	0	0	0	0	0	0	0	0	0	0	0	0	0	0	0	0	0	0	0	0	0	0	0	0	0	0	0	0	0	0	0	0	0
ACADVL__chr17	1	7.01	7.01	0	0	3	2	2	9.01	0	6	5	2	3	7.01	6	0	10.01	4	1	2	1	6	2	3	3	3	3	2	7.01	6	8.01	7.01	1	9.01	1	1	6	20.05	8.01	4	14.02	5	14.02	0	0	0	4	7.01
ACAP1__chr17	0	0	0	0	0	0	0	0	0	0	0	1	0	0	0	0	0	0	0	0	0	0	0	0	0	0	0	0	0	0	0	0	0	0	0	0	0	0	0	0	0	0	0	0	0	0	0	0	0
ACAP2__chr3	3	1	3	5	0	1	2	1	3	0	0	4	1	3	5	2	0	1	0	1	0	0	0	0	0	1	1	3	2	6	6	2	9.01	1	4	2	4	4	7.01	1	4	3	4	3	0	0	0	1	4
ACAP3__chr1	0	2	0	0	0	0	0	0	0	0	0	0	0	1	1	0	0	4	2	0	0	1	0	0	2	0	2	0	0	1	1	2	1	0	1	0	0	2	1	0	0	0	0	3	0	0	1	0	0
ACAT1__chr11	2	1	2	2	0	1	2	1	1	0	2	4	2	2	6	1	0	2	2	1	0	0	1	1	1	1	3	4	5	9.01	7.01	5	6	0	5	0	5	0	4	8.01	3	2	6	8.01	0	0	4	2	2
ACAT2__chr6	1	1	1	0	0	1	0	0	1	0	0	2	1	1	1	0	0	1	1	1	0	0	0	0	2	0	0	2	0	3	1	6	0	0	1	1	2	0	5	1	1	0	0	2	0	0	0	2	3
ACBD3__chr1	2	1	1	2	0	1	4	2	3	1	0	4	0	2	2	0	0	2	1	0	1	0	2	1	1	0	4	2	4	8.01	3	3	3	0	0	1	1	1	3	1	3	2	2	4	0	0	0	1	6
ACBD4__chr17	0	0	0	0	0	0	0	0	0	0	0	0	0	0	0	0	0	0	0	0	0	0	0	0	0	0	0	0	0	1	0	0	0	0	0	0	0	0	0	1	0	0	0	1	0	0	0	0	0
ACBD5__chr10	0	0	0	0	0	3	0	1	1	0	0	0	0	1	2	1	0	1	0	1	0	0	0	0	1	1	2	1	1	4	0	0	0	1	0	0	0	0	2	1	0	3	1	1	0	0	0	0	2
ACBD6__chr1	3	1	0	2	0	3	2	2	1	0	1	2	2	1	1	0	0	0	2	1	0	0	1	0	1	2	2	2	3	4	4	2	2	1	8.01	2	2	1	3	2	5	1	0	2	0	0	2	2	4
ACBD7__chr10	0	0	0	0	0	1	0	0	1	0	0	0	0	0	0	1	0	0	1	0	0	0	0	0	0	0	0	0	0	1	2	0	1	0	0	0	3	1	0	0	0	1	1	0	0	0	0	1	0
ACCS__chr11	0	0	0	0	0	0	0	0	0	0	0	0	0	0	0	0	0	0	0	0	0	0	0	0	0	0	0	0	0	0	0	0	0	0	1	0	0	0	0	0	0	0	0	0	0	0	0	0	0
ACD__chr16	0	1	2	0	0	0	3	0	6	0	0	0	2	0	2	4	0	1	2	1	0	0	1	0	1	0	2	0	1	1	0	1	2	0	5	0	0	0	4	2	0	0	0	5	0	0	0	3	0
ACER2__chr9	0	0	0	0	0	0	0	0	0	0	0	0	0	0	0	0	0	0	0	0	0	0	0	0	0	0	0	0	0	0	1	0	0	0	0	0	0	0	0	0	0	0	0	1	0	0	0	0	0
ACER3__chr11	0	0	0	0	0	0	0	0	0	0	0	2	0	2	0	3	0	0	1	0	0	0	0	0	1	1	1	0	1	0	2	1	0	0	1	0	1	1	1	2	0	0	0	1	0	0	0	2	0
ACE__chr17	0	0	0	0	0	0	0	0	0	0	0	0	0	0	0	0	0	0	0	0	0	0	0	0	0	0	0	0	0	0	0	0	0	0	0	0	0	0	0	0	0	0	0	0	0	0	0	0	0
ACIN1__chr14	2	7.01	2	0	0	3	4	2	8.01	0	2	10.01	2	5	9.01	7.01	1	7.01	8.01	0	2	3	3	3	4	4	5	10.01	6	14.02	3	18.04	10.01	3	17.03	3	7.01	6	12.02	12.02	2	7.01	3	8.01	0	0	1	0	1
ACLY__chr17	4	6	3	1	1	14.02	6	3	9.01	0	4	18.04	2	5	8.01	9.01	0	8.01	5	9.01	0	1	8.01	2	8.01	8.01	14.02	10.01	6	26.08	19.04	18.04	13.02	4	11.01	3	12.02	6	25.07	16.03	8.01	9.01	11.01	16.03	0	3	5	7.01	11.01
ACN9__chr7	0	1	0	0	0	0	2	0	0	0	0	1	1	0	1	0	0	1	1	0	0	0	1	0	1	0	2	0	0	4	0	3	0	1	0	2	0	0	2	2	2	0	1	2	0	0	2	0	3
ACO1__chr9	2	1	1	0	1	0	2	1	2	0	0	7.01	3	4	2	6	0	3	1	0	1	1	3	0	4	0	8.01	6	3	8.01	5	5	5	2	6	2	2	0	3	5	5	6	1	4	0	0	2	4	9.01
ACO2__chr22	0	0	0	0	0	0	0	0	0	0	0	0	0	0	0	1	0	0	1	0	0	0	0	0	0	1	0	0	0	1	0	0	0	0	0	0	0	0	0	1	0	0	0	1	0	0	0	0	0
ACOT11__chr1	0	0	0	0	0	0	0	0	0	0	0	0	0	0	0	0	0	0	1	0	0	0	0	0	0	0	0	0	0	0	0	0	0	0	1	0	0	0	0	1	0	0	0	0	0	0	0	0	0
ACOT12__chr5	0	0	0	0	0	0	0	0	0	0	0	0	0	0	0	0	0	0	0	0	0	0	0	0	0	0	0	0	0	0	0	0	0	0	0	0	0	0	0	0	0	0	0	0	0	0	0	0	0
ACOT13__chr6	2	0	1	2	0	0	0	1	0	0	2	3	0	0	2	0	0	0	0	0	0	0	0	2	0	0	0	0	0	0	0	0	0	0	1	2	2	1	1	0	0	0	1	1	0	0	1	0	0
ACOT2__chr14	0	0	0	0	0	0	1	0	0	0	1	1	0	0	0	0	0	0	0	0	0	0	0	0	0	0	0	0	0	0	0	0	0	0	0	0	0	0	0	0	0	0	0	0	0	0	0	0	0
ACOT4__chr14	0	0	0	0	0	0	0	0	0	0	0	0	0	0	0	0	0	0	0	0	0	0	0	0	0	0	0	0	0	0	0	0	0	0	0	0	0	0	0	0	0	0	0	0	0	0	0	0	0
ACOT7__chr1	3	2	3	2	0	5	4	0	6	0	3	6	3	6	2	4	0	6	1	3	0	0	1	4	4	2	4	3	2	6	16.03	13.02	9.01	2	9.01	1	7.01	6	6	6	0	6	6	6	1	0	3	4	4
ACOT8__chr20	0	1	0	0	0	0	1	0	0	0	0	0	0	0	1	0	0	0	0	0	0	0	0	0	1	0	0	0	0	1	0	0	0	0	0	0	0	0	1	0	0	0	0	1	0	0	0	0	0
ACOT9__chrX	0	1	4	2	0	8.01	0	1	3	0	2	2	0	3	3	2	1	7.01	4	2	2	0	0	6	1	1	2	3	0	5	7.01	8.01	3	0	4	3	2	2	11.01	7.01	1	4	3	3	0	0	1	1	2
ACOX1__chr17	0	1	0	0	0	1	0	1	1	0	0	2	0	0	0	0	0	1	2	0	0	0	3	1	0	0	1	1	1	0	1	0	4	0	3	0	3	0	1	3	1	1	0	4	0	0	0	0	1
ACOX2__chr3	0	0	1	0	0	0	2	0	0	0	0	1	0	0	0	0	0	0	0	0	0	0	0	0	0	0	0	0	0	0	3	0	0	0	1	0	0	0	0	0	0	1	0	0	0	0	0	0	0
ACOX3__chr4	0	0	0	2	0	2	0	0	0	0	0	2	0	0	1	1	0	2	1	0	0	0	0	0	0	2	0	0	0	1	2	1	0	0	1	0	0	0	0	0	0	1	1	0	0	0	0	0	0
ACP1__chr2	3	1	5	3	0	5	7.01	2	3	0	1	13.02	3	6	8.01	4	0	5	3	3	0	0	11.01	4	7.01	1	7.01	12.02	6	21.05	6	7.01	8.01	3	5	1	5	5	6	5	2	5	7.01	10.01	0	0	4	4	3
ACP2__chr11	0	0	0	0	0	0	0	0	2	0	1	1	1	0	1	0	0	0	1	0	0	0	0	0	0	1	1	0	1	0	4	1	1	0	3	0	1	0	4	1	2	0	1	0	0	0	0	0	3
ACP6__chr1	0	0	0	0	0	0	0	0	0	0	0	1	0	0	2	0	0	1	0	0	0	0	0	0	0	0	1	0	0	0	1	0	1	0	1	0	0	0	0	0	0	1	1	0	0	0	0	0	0
ACPL2__chr3	0	0	1	0	0	0	0	0	0	0	0	0	0	0	0	0	0	0	0	0	0	0	0	0	0	0	0	0	1	0	0	0	0	0	0	0	0	0	0	0	0	0	0	1	0	0	0	0	1
ACPP__chr3	0	0	0	0	0	0	0	0	0	0	0	0	0	0	0	0	0	0	0	0	0	0	0	0	0	0	0	0	0	0	0	0	0	0	0	0	0	0	0	0	0	0	0	0	0	0	0	0	0
ACRBP__chr12	0	0	0	0	0	0	0	0	0	0	0	0	0	0	0	0	0	0	0	0	0	0	0	0	0	0	0	0	0	0	0	0	0	0	0	0	0	0	0	0	0	0	0	0	0	0	0	0	0
ACRC__chrX	0	0	0	0	0	0	0	0	0	0	0	0	0	0	1	0	0	0	0	0	0	0	0	0	0	0	0	0	0	0	0	0	0	0	0	0	0	0	0	0	0	0	0	0	0	0	0	0	0
ACSF2__chr17	0	0	1	0	0	0	0	0	0	0	0	1	0	0	0	1	0	0	0	0	0	0	0	0	0	0	0	0	0	0	1	0	0	0	0	0	0	0	0	0	0	1	0	0	0	0	0	0	0
ACSF3__chr16	0	0	2	0	0	0	1	1	0	0	0	2	2	0	1	3	0	1	0	1	0	0	3	0	0	2	0	0	0	0	0	0	3	0	0	0	0	0	1	3	0	0	0	1	0	0	0	0	1
ACSL1__chr4	0	1	0	1	0	1	3	1	1	1	2	0	0	1	4	2	1	0	0	1	0	0	0	1	1	0	0	2	1	1	0	0	1	0	1	0	1	2	0	2	0	1	0	2	0	0	1	0	0
ACSL3__chr2	0	2	9.01	1	0	3	2	1	4	0	3	5	3	3	5	4	0	2	6	4	2	4	5	1	4	7.01	5	3	3	7.01	5	7.01	8.01	3	12.02	3	5	4	7.01	8.01	3	4	3	11.01	1	0	4	0	3
ACSL4__chrX	1	4	6	7.01	0	7.01	6	3	12.02	0	9.01	21.05	4	4	8.01	10.01	0	6	3	2	0	0	4	1	10.01	3	13.02	11.01	3	21.05	14.02	9.01	5	5	16.03	3	2	5	8.01	18.04	6	4	2	14.02	0	0	6	4	5
ACSL5__chr10	0	0	1	0	0	0	0	0	0	0	0	1	0	0	0	0	0	0	0	0	0	0	0	0	0	0	0	1	0	0	0	0	0	0	0	0	0	0	0	1	0	0	0	1	0	0	0	0	0
ACSL6__chr5	0	0	0	0	0	0	0	0	0	0	0	0	0	0	0	0	0	0	0	0	0	0	0	0	0	0	0	0	0	0	0	0	0	0	0	0	0	0	0	0	0	0	0	0	0	0	0	0	0
ACSM2A__chr16	0	0	0	0	0	0	0	0	0	0	0	0	0	0	0	0	0	0	0	0	0	0	0	0	0	0	0	0	0	0	0	0	0	0	0	0	0	0	0	0	0	0	0	0	0	0	0	0	0
ACSM3__chr16	0	0	0	0	0	0	0	0	0	0	0	0	0	0	0	0	0	0	0	0	0	0	0	0	0	0	0	1	0	0	0	0	0	0	2	0	0	0	0	0	0	0	0	0	0	0	0	0	0
ACSM5__chr16	0	0	0	0	0	0	0	0	0	0	0	0	0	1	0	0	0	0	0	0	0	0	0	0	0	0	0	0	0	0	0	0	0	0	0	0	0	0	0	0	0	0	0	0	0	0	0	0	0
ACSS2__chr20	0	0	1	0	0	0	0	0	1	0	0	1	0	0	2	1	0	0	1	0	1	0	2	0	0	0	0	0	0	0	1	2	0	0	1	0	0	0	0	0	0	0	1	0	0	0	0	0	1
ACSS3__chr12	0	0	0	0	0	0	0	0	0	0	0	0	0	0	0	0	0	1	0	0	1	0	2	0	0	0	0	0	0	0	0	0	0	0	0	0	0	0	0	0	0	1	0	0	0	0	0	0	0
ACTA1__chr1	0	0	0	0	0	0	0	0	0	0	0	0	0	0	0	0	0	0	0	0	0	0	0	0	0	0	0	0	0	0	0	0	0	0	0	0	0	0	0	0	0	0	0	0	0	0	0	0	0
ACTA2__chr10	0	5	2	1	0	2	4	1	0	0	1	4	1	0	5	2	0	1	6	0	1	0	0	0	0	2	2	0	4	4	0	1	0	3	1	0	5	2	5	0	1	7.01	2	1	0	0	2	1	3
ACTBL2__chr5	0	0	0	0	0	0	0	0	0	0	0	0	0	0	0	0	0	0	0	0	0	0	0	0	0	0	0	0	0	0	0	0	0	0	0	0	0	0	0	0	0	0	0	1	0	0	0	0	0
ACTB__chr7	169.44	202.92	228.21	97.13	5	261.12	270.72	139.33	340.75	5	201.87	489.01	188.24	312.6	341.84	336.41	11.01	281.42	234.56	141.4	56.38	44.23	207.13	96.11	364.73	235.62	400.96	268.59	230.33	660.42	476.64	592.84	567.5	111.49	472.14	371.29	413.1	241.98	600.94	529.77	205.02	386.64	357.08	373.48	8.01	5	178.83	280.35	310.44
ACTG1P4__chr1	0	0	0	0	0	0	0	0	0	0	0	0	0	0	0	0	0	0	0	0	0	0	0	0	0	0	0	0	0	0	0	0	0	0	0	0	0	0	0	0	0	0	0	0	0	0	0	0	0
ACTG1__chr17	134.16	160.07	240.92	119.72	6	205.02	299.67	79.76	289.99	5	185.1	631.16	154.87	292.14	372.38	295.36	3	313.67	178.83	123.84	44.23	45.24	211.33	90.99	277.14	227.16	346.19	358.17	205.02	704.13	453.11	566.35	515.01	101.23	434.17	383.35	369.1	210.28	698.19	613.7	203.97	398.75	298.59	276.07	5	7.01	205.02	229.27	339.66
ACTG2__chr2	0	0	0	0	0	0	0	0	0	0	0	0	0	0	0	0	0	0	0	0	0	0	0	0	0	0	0	0	0	0	0	0	0	0	0	0	0	0	0	0	0	0	0	0	0	0	0	0	0
ACTL10__chr20	0	0	0	0	0	0	0	1	0	0	0	0	0	0	0	0	0	0	0	0	0	0	0	0	0	0	0	0	0	0	0	0	0	0	0	0	0	0	0	0	0	0	0	0	0	0	0	0	0
ACTL6A__chr3	2	4	2	2	0	4	1	2	3	0	7.01	2	3	1	8.01	4	0	4	6	1	2	0	4	0	5	3	3	5	2	12.02	4	5	5	3	8.01	5	8.01	1	6	4	3	6	3	10.01	0	0	1	0	2
ACTL7A__chr9	0	0	0	0	0	0	0	0	0	0	0	0	0	0	0	0	0	0	0	0	0	0	0	0	0	0	0	0	0	0	0	0	0	0	0	0	0	0	0	0	0	0	0	0	0	0	0	0	0
ACTN1__chr14	20.05	25.07	34.14	18.04	5	25.07	51.31	17.03	75.69	2	36.15	69.58	32.12	22.06	64.5	36.15	3	40.19	32.12	16.03	8.01	4	29.1	8.01	48.28	32.12	62.47	39.18	44.23	75.69	55.37	75.69	92.01	28.09	54.35	35.15	48.28	37.16	132.09	104.3	19.04	58.41	53.34	58.41	2	1	21.05	41.2	52.33
ACTN4__chr19	19.04	34.14	34.14	12.02	1	33.13	34.14	12.02	49.29	1	26.08	58.41	18.04	30.11	49.29	22.06	0	24.07	29.1	24.07	7.01	5	24.07	13.02	29.1	34.14	38.17	25.07	18.04	57.39	55.37	81.8	57.39	14.02	62.47	44.23	35.15	23.06	90.99	74.67	26.08	54.35	37.16	55.37	1	1	28.09	24.07	38.17
ACTR10__chr14	1	4	3	3	0	6	3	1	3	0	3	9.01	1	0	7.01	1	0	1	8.01	2	1	0	1	1	3	4	4	2	3	11.01	4	3	5	3	6	5	6	3	9.01	9.01	4	7.01	7.01	6	0	0	5	3	2
ACTR1A__chr10	8.01	7.01	4	1	1	8.01	11.01	6	7.01	0	3	19.04	5	3	10.01	5	0	8.01	8.01	7.01	1	1	8.01	1	7.01	9.01	8.01	3	3	18.04	29.1	10.01	19.04	2	21.05	3	15.03	5	18.04	13.02	2	13.02	8.01	16.03	0	2	3	7.01	10.01
ACTR1B__chr2	0	0	1	0	0	1	2	0	1	0	2	4	1	1	0	0	0	2	4	0	0	0	2	0	3	2	6	1	1	2	1	5	3	0	4	0	4	2	4	1	1	2	3	5	0	0	1	2	0
ACTR2__chr2	6	6	15.03	6	0	18.04	12.02	6	16.03	0	8.01	33.13	8.01	15.03	33.13	12.02	0	10.01	10.01	3	2	6	8.01	5	18.04	9.01	22.06	11.01	8.01	18.04	18.04	17.03	12.02	12.02	26.08	13.02	7.01	6	40.19	13.02	9.01	9.01	14.02	15.03	1	0	6	8.01	15.03
ACTR3B__chr7	0	0	0	0	0	0	0	0	0	0	0	0	0	0	0	0	0	0	0	0	0	0	1	0	1	0	0	0	0	0	0	0	0	0	0	0	0	0	0	0	0	0	0	1	0	0	0	0	0
ACTR3C__chr7	0	0	0	0	0	0	0	0	0	0	0	0	0	0	0	0	0	0	0	0	0	0	0	0	0	0	0	0	0	0	0	0	0	0	0	0	0	0	0	0	0	0	0	0	0	0	0	0	0
ACTR3__chr2	4	6	10.01	8.01	0	10.01	13.02	9.01	17.03	0	11.01	44.23	5	20.05	17.03	11.01	0	11.01	9.01	2	4	4	16.03	5	15.03	4	15.03	24.07	9.01	30.11	33.13	19.04	17.03	11.01	23.06	14.02	22.06	7.01	37.16	27.09	9.01	11.01	8.01	23.06	0	0	17.03	7.01	22.06
ACTR5__chr20	1	0	0	0	0	1	0	0	1	0	0	1	0	0	0	1	0	0	1	1	0	0	0	0	0	0	0	1	0	1	0	0	0	0	0	0	1	0	1	0	0	0	0	0	0	0	0	0	0
ACTR6__chr12	1	0	0	0	0	1	1	0	0	0	0	1	0	1	1	1	0	1	1	1	1	0	0	0	0	0	1	2	2	4	2	3	0	2	2	1	0	0	1	3	1	2	0	1	1	0	1	2	1
ACTR8__chr3	0	0	1	0	0	0	0	0	0	0	0	1	0	1	1	0	0	1	0	0	0	0	1	0	0	1	0	1	0	1	1	0	0	0	0	3	0	1	2	1	0	1	1	1	0	0	0	1	1
ACTRT3__chr3	0	1	0	0	0	0	0	0	0	0	0	0	0	0	0	1	0	0	1	0	0	0	0	0	0	0	0	0	0	0	0	0	0	0	0	0	0	0	0	0	0	0	0	0	0	0	0	1	0
ACVR1B__chr12	1	0	0	0	0	0	0	0	0	0	1	0	0	0	3	0	0	0	1	1	0	0	1	0	0	1	1	1	0	0	1	2	1	1	0	0	1	0	2	4	0	1	0	1	0	1	0	2	0
ACVR1C__chr2	0	0	0	0	0	0	0	0	0	0	0	0	0	0	0	0	0	0	0	0	0	0	0	0	0	0	0	0	0	0	0	0	0	0	0	0	0	0	0	0	0	0	1	0	0	0	0	0	0
ACVR1__chr2	0	3	1	0	0	3	1	0	1	0	0	1	0	3	1	0	0	0	0	2	0	0	1	0	0	0	1	1	0	1	0	2	2	0	3	1	0	0	1	3	1	2	1	1	0	0	2	0	1
ACVR2A__chr2	0	0	0	0	0	0	1	0	0	0	0	0	0	0	0	0	0	0	0	0	0	0	0	0	0	1	0	1	0	2	0	0	0	0	0	0	0	0	0	0	0	2	1	0	0	0	0	0	0
ACVR2B-AS1__chr3	0	0	0	0	0	0	0	0	0	0	0	0	0	0	0	0	0	0	1	0	0	0	0	0	0	0	0	1	0	0	0	0	0	0	0	0	0	0	0	0	0	0	0	0	0	0	0	0	1
ACVR2B__chr3	0	0	0	0	0	0	0	0	1	0	0	0	0	0	0	0	0	0	1	0	0	0	0	0	0	0	0	0	0	0	0	0	0	0	0	0	0	0	1	0	1	0	0	0	0	0	0	0	1
ACYP1__chr14	0	0	1	1	0	1	0	0	1	0	1	3	0	0	2	0	0	0	0	0	1	0	0	1	0	1	1	1	2	6	6	1	0	1	1	1	4	1	3	2	3	0	2	3	0	0	2	1	2
ACYP2__chr2	0	0	0	0	0	0	1	0	0	0	1	1	0	0	0	1	0	0	1	0	0	0	0	0	0	0	1	0	1	1	0	0	0	0	0	0	0	1	0	0	0	0	0	0	0	0	0	0	1
ADAL__chr15	0	0	0	1	0	0	3	0	0	0	0	0	0	0	1	0	0	0	1	0	0	0	0	0	0	0	0	0	0	1	1	0	0	0	0	0	1	0	1	2	0	0	0	0	0	0	0	1	0
ADAM10__chr15	0	0	0	0	0	1	0	0	1	0	0	2	0	0	3	0	0	1	0	0	0	0	1	0	0	1	0	0	0	0	1	1	0	0	0	0	2	0	0	0	0	0	0	0	0	0	0	0	0
ADAM11__chr17	0	0	0	0	0	0	0	0	0	0	0	0	0	0	0	0	0	0	0	0	0	0	0	0	0	0	0	0	0	0	0	0	1	0	0	0	0	0	0	0	0	0	0	0	0	0	0	0	0
ADAM12__chr10	1	1	0	0	0	1	1	5	2	0	1	5	0	0	4	2	0	2	1	1	1	1	3	2	1	1	0	1	0	7.01	1	2	2	2	4	2	3	2	1	3	2	1	2	1	0	0	1	1	1
ADAM15__chr1	0	0	0	1	0	1	1	0	1	1	0	1	2	1	1	5	0	4	1	3	0	0	0	0	1	3	2	0	2	0	1	3	1	0	1	1	1	1	2	3	1	1	1	4	0	0	2	1	1
ADAM17__chr2	0	2	1	0	0	0	1	1	2	0	0	0	0	0	1	1	0	1	3	0	0	0	0	0	0	0	1	2	1	5	2	1	1	1	1	2	1	0	3	2	0	1	1	2	0	0	0	0	1
ADAM18__chr8	0	0	0	0	0	0	0	0	0	0	0	0	0	0	0	0	0	0	0	0	0	0	0	0	0	0	0	0	0	0	0	0	0	0	0	0	0	0	0	0	0	0	0	0	0	0	0	0	0
ADAM19__chr5	0	4	9.01	0	0	2	4	1	7.01	0	6	7.01	2	2	3	2	0	3	3	3	1	0	5	0	6	4	6	1	3	13.02	8.01	9.01	4	3	5	2	12.02	1	15.03	9.01	2	6	3	4	0	0	3	3	6
ADAM1A__chr12	0	0	0	0	0	0	0	0	0	0	0	0	0	0	0	0	0	0	0	0	0	0	0	0	0	0	0	0	0	0	0	1	0	0	0	1	1	0	0	0	0	0	0	0	0	0	0	0	0
ADAM20P1__chr14	0	0	0	0	0	0	0	0	0	0	0	0	0	0	0	0	0	0	0	0	0	0	0	0	0	0	0	0	0	0	0	0	0	0	0	0	0	0	0	0	0	0	0	0	0	0	0	0	0
ADAM20__chr14	0	0	0	0	0	0	0	0	0	0	0	0	0	0	0	0	0	0	0	0	0	0	2	0	0	0	0	0	0	0	0	0	0	0	0	0	0	0	0	0	0	0	0	0	0	0	0	0	0
ADAM21__chr14	0	0	0	0	0	0	0	0	0	0	0	0	0	0	0	0	0	0	0	0	0	0	0	0	0	0	0	0	0	0	0	0	0	0	0	0	0	0	0	0	0	0	0	0	0	0	0	0	0
ADAM22__chr7	0	0	0	0	0	0	0	0	0	0	0	0	0	0	0	0	0	0	0	0	1	0	0	0	1	0	0	0	0	1	1	0	0	0	0	0	0	0	0	0	0	0	0	1	0	0	0	0	0
ADAM23__chr2	0	0	0	0	0	0	0	0	2	0	0	0	0	0	0	0	0	0	0	1	0	0	0	0	0	0	1	0	0	0	0	0	0	0	0	1	1	0	0	1	0	0	1	1	0	0	0	0	0
ADAM30__chr1	0	0	0	0	0	0	0	0	0	0	0	0	0	0	0	0	0	0	0	0	0	0	0	0	0	0	0	0	0	0	0	0	0	0	0	0	0	0	0	0	0	0	0	0	0	0	0	0	0
ADAM32__chr8	0	0	0	0	0	0	0	0	0	0	0	0	0	0	0	0	0	0	0	0	0	0	0	0	0	0	0	0	0	0	0	0	0	0	0	0	0	0	0	0	0	0	0	1	0	0	0	0	0
ADAM33__chr20	0	0	0	0	0	0	0	0	0	0	0	0	0	0	0	0	0	0	0	0	0	0	0	0	0	0	0	0	0	0	0	0	1	0	0	0	0	0	0	0	0	0	0	0	0	0	0	0	0
ADAM8__chr10	0	0	0	0	0	0	0	0	0	0	0	1	0	0	0	0	0	1	0	0	0	0	0	0	0	0	0	0	0	1	0	0	0	0	0	0	0	0	0	1	0	0	0	0	0	0	0	0	1
ADAM9__chr8	7.01	5	8.01	7.01	0	7.01	13.02	4	5	0	8.01	31.11	10.01	6	15.03	6	2	5	3	4	4	0	6	9.01	10.01	10.01	21.05	9.01	6	33.13	22.06	19.04	9.01	7.01	16.03	16.03	14.02	7.01	21.05	20.05	15.03	16.03	17.03	9.01	0	0	10.01	4	15.03
ADAMTS10__chr19	0	1	0	0	0	0	0	0	1	0	0	0	0	0	0	0	0	0	0	0	0	0	1	0	0	0	0	0	0	0	0	0	0	0	1	0	1	1	1	2	0	1	0	0	0	0	0	0	0
ADAMTS12__chr5	0	2	0	0	0	0	1	0	0	0	1	0	0	1	3	1	0	1	0	0	0	0	0	0	2	0	2	0	0	0	1	1	1	0	2	0	0	1	1	1	2	0	1	1	0	0	0	0	0
ADAMTS13__chr9	0	0	0	0	0	0	0	0	0	0	0	0	0	0	0	0	0	0	0	0	0	0	0	0	0	0	0	0	0	0	0	0	0	0	0	0	0	0	0	0	0	0	0	0	0	0	0	0	0
ADAMTS14__chr10	0	0	0	0	0	0	0	0	0	0	0	0	0	0	0	0	0	0	0	0	0	0	0	0	0	0	0	0	0	0	0	0	0	0	0	0	0	0	0	0	0	0	0	0	0	0	0	0	0
ADAMTS15__chr11	0	0	0	0	0	0	0	0	0	0	0	0	0	0	0	0	0	0	0	0	0	0	0	0	1	0	0	0	0	2	0	0	0	0	0	0	0	1	0	1	0	0	0	0	0	0	0	0	0
ADAMTS16__chr5	0	0	0	0	0	0	0	0	0	0	0	0	0	0	0	0	0	0	0	0	0	0	0	0	0	0	0	0	0	0	0	0	0	0	0	0	0	0	0	0	0	0	0	0	0	0	0	0	0
ADAMTS17__chr15	0	0	0	0	0	0	0	0	0	0	0	0	0	0	0	0	0	0	0	0	0	0	0	0	0	0	0	0	0	0	0	0	0	0	0	0	0	0	0	0	0	0	0	0	0	0	0	0	0
ADAMTS18__chr16	0	0	0	0	0	0	0	0	0	0	0	0	0	0	0	0	0	0	0	0	0	0	0	0	0	0	0	0	0	0	0	0	0	0	0	0	0	0	0	0	0	0	0	0	0	0	0	0	0
ADAMTS1__chr21	0	0	1	0	0	0	1	0	0	0	0	0	1	2	1	0	0	0	0	0	0	0	0	0	9.01	0	0	1	0	3	1	6	1	0	1	0	0	0	5	0	0	0	4	0	0	0	0	1	1
ADAMTS2__chr5	0	0	0	0	0	0	0	0	0	0	0	0	0	0	0	0	0	0	0	0	0	0	0	0	0	0	0	0	0	0	0	0	0	0	0	0	0	0	0	0	0	0	0	0	0	0	0	0	0
ADAMTS3__chr4	0	0	0	0	0	0	0	0	0	0	1	0	0	1	0	0	0	0	0	0	0	0	0	0	0	1	0	0	0	0	0	0	1	0	0	0	0	0	0	0	0	1	0	0	0	0	0	0	0
ADAMTS4__chr1	0	0	0	0	0	0	0	0	0	0	0	0	0	0	0	0	0	0	0	0	0	0	0	0	0	0	0	0	0	0	0	0	0	0	0	0	0	0	0	0	0	0	0	0	0	0	0	0	0
ADAMTS5__chr21	0	0	0	0	0	0	0	0	0	0	0	0	0	0	0	0	0	0	0	0	0	0	0	0	1	0	0	0	0	0	0	0	0	0	0	0	0	0	0	0	0	0	0	0	0	0	0	0	0
ADAMTS6__chr5	2	1	0	1	0	2	0	0	5	0	1	0	1	1	0	1	0	0	0	1	0	2	0	0	3	3	1	1	2	1	6	4	0	1	0	0	1	2	0	4	0	4	4	4	0	0	0	1	3
ADAMTS7__chr15	0	0	0	0	0	1	0	0	0	0	0	1	0	0	0	0	0	0	0	1	0	0	0	1	0	1	0	0	0	0	1	0	0	0	0	1	0	0	1	0	0	0	0	0	0	0	1	1	1
ADAMTS9__chr3	1	0	0	0	0	0	0	0	0	0	0	0	0	0	0	0	0	0	0	0	0	0	0	0	0	0	0	0	0	0	0	0	0	0	0	0	0	0	0	0	0	0	0	0	0	0	0	0	0
ADAMTSL1__chr9	0	2	2	1	0	4	1	1	4	0	5	3	2	2	6	0	0	3	0	0	1	0	2	0	1	0	4	3	0	8.01	5	5	1	1	2	1	4	1	6	3	1	3	4	4	1	0	2	1	3
ADAMTSL2__chr9	0	0	0	0	0	0	0	0	0	0	0	0	0	0	0	0	0	0	0	0	0	0	0	0	0	0	0	0	0	0	0	0	0	0	0	0	0	0	0	0	0	0	0	0	0	0	0	0	0
ADAMTSL3__chr15	0	0	0	0	0	1	0	0	2	0	0	0	0	0	0	0	0	0	0	1	0	0	0	0	0	0	0	0	1	1	2	1	0	1	0	0	0	0	0	0	0	0	0	1	0	0	0	0	0
ADAMTSL4__chr1	0	0	0	0	0	0	0	0	0	0	0	0	0	0	0	2	0	0	0	0	0	0	0	0	0	0	0	0	0	0	0	0	0	0	0	0	0	0	0	0	0	0	1	0	0	0	0	0	0
ADAMTSL5__chr19	0	0	0	0	0	0	1	0	0	0	0	0	0	0	0	0	0	0	0	0	0	0	0	0	0	0	0	0	0	0	0	0	1	0	0	0	0	0	0	0	0	1	0	0	0	0	0	0	1
ADAP2__chr17	0	0	0	0	0	0	0	0	0	0	0	0	0	0	0	0	0	0	0	0	0	0	0	0	0	0	0	0	0	0	0	0	0	0	0	0	0	0	0	0	0	0	0	0	0	0	0	0	0
ADARB1__chr21	0	0	1	0	0	0	0	0	0	0	1	0	0	0	0	1	0	0	0	0	0	0	0	0	0	0	0	1	0	0	2	1	2	0	0	0	1	0	0	0	0	0	0	1	0	0	0	1	2
ADAR__chr1	1	9.01	3	3	0	8.01	5	6	11.01	1	8.01	15.03	3	4	14.02	5	0	16.03	10.01	3	2	1	4	1	4	11.01	8.01	12.02	6	19.04	12.02	18.04	7.01	2	15.03	3	10.01	11.01	9.01	12.02	11.01	13.02	9.01	21.05	0	2	5	1	13.02
ADAT1__chr16	0	1	1	0	0	0	0	1	3	0	1	3	0	0	0	1	0	2	4	1	1	0	0	0	1	0	0	0	1	1	5	1	3	1	6	1	2	0	3	0	0	1	1	3	0	0	0	2	0
ADAT2__chr6	0	0	0	1	0	0	0	0	1	0	0	1	1	1	2	0	0	0	0	0	0	0	0	0	0	0	0	0	0	1	0	1	0	0	1	0	1	0	1	1	1	0	1	1	0	0	0	1	0
ADAT3__chr19	0	0	0	0	0	0	0	1	0	0	0	0	0	1	1	0	0	0	2	0	0	0	0	0	0	0	0	0	1	0	1	0	1	0	0	0	1	0	0	2	0	1	0	1	0	0	0	0	0
ADA__chr20	0	0	0	0	0	0	0	0	0	0	0	0	0	0	0	0	0	0	0	1	0	0	0	0	0	1	0	0	0	0	1	0	0	0	0	0	0	0	0	0	0	0	0	0	0	0	1	0	0
ADCK1__chr14	0	0	0	0	0	0	0	0	0	0	0	0	0	0	0	0	0	0	0	0	0	0	1	0	0	0	0	0	0	0	0	1	0	0	0	0	1	1	0	0	0	1	0	2	0	0	0	0	0
ADCK2__chr7	0	0	0	0	0	0	0	0	0	0	0	0	0	1	0	2	0	1	0	0	0	0	1	0	0	0	1	0	1	0	0	0	1	0	0	0	0	0	1	1	0	1	1	0	0	0	2	0	1
ADCK3__chr1	1	0	0	0	0	0	0	0	0	0	0	0	0	1	1	1	0	0	0	1	0	0	0	0	0	0	0	0	0	1	0	0	1	0	0	0	0	0	0	1	0	0	0	2	0	0	0	0	0
ADCK4__chr19	0	0	0	0	0	0	0	0	0	0	1	0	0	0	0	0	0	1	2	0	0	0	0	0	0	0	1	0	1	1	0	0	0	0	0	0	0	0	0	1	0	0	0	0	0	0	0	0	0
ADCK5__chr8	0	0	0	0	0	0	0	0	0	0	0	0	0	0	0	0	0	0	1	0	0	0	0	0	0	0	0	0	0	0	0	2	3	0	0	0	1	0	0	0	0	0	0	0	0	0	0	0	0
ADCY10P1__chr6	0	0	0	0	0	0	0	0	0	0	0	0	0	0	0	0	0	0	0	0	0	0	0	0	0	0	0	0	0	0	0	0	0	0	0	0	0	0	0	0	0	0	0	0	0	0	0	0	0
ADCY10__chr1	0	0	0	0	0	0	0	0	0	0	0	0	0	0	0	0	0	0	0	0	0	0	0	0	0	0	0	0	0	0	0	0	0	0	0	0	0	0	0	0	0	0	0	0	0	0	0	0	0
ADCY1__chr7	0	0	0	0	0	0	0	0	0	0	0	0	0	0	0	0	0	0	0	0	0	0	0	0	0	0	0	0	0	0	0	0	0	0	0	0	0	0	0	0	0	0	0	0	0	0	0	0	0
ADCY2__chr5	0	0	0	0	0	0	0	0	2	0	0	0	0	0	0	0	0	0	0	0	0	0	0	0	0	0	0	0	0	0	0	0	0	0	0	0	0	0	0	0	0	0	0	0	0	0	0	0	0
ADCY3__chr2	0	0	0	0	0	0	1	0	0	0	0	2	0	0	0	0	0	0	0	0	0	0	0	0	1	0	0	0	0	1	1	0	0	0	0	0	0	0	1	0	0	1	1	0	0	0	0	0	0
ADCY6__chr12	0	0	0	1	0	2	1	0	1	0	1	1	0	0	3	2	0	0	0	0	0	0	0	1	2	1	1	3	0	0	2	1	0	0	0	0	0	0	0	1	0	0	1	1	0	0	0	0	1
ADCY7__chr16	0	0	0	0	0	0	0	0	0	0	0	0	0	0	0	0	0	0	0	0	0	0	1	0	0	0	0	0	0	0	0	0	0	0	0	0	0	0	0	0	0	0	0	0	0	0	0	0	0
ADCY9__chr16	0	0	0	0	0	0	2	1	1	0	0	1	0	0	0	0	0	2	0	0	1	0	0	0	0	0	0	0	0	0	0	0	1	0	0	0	0	0	1	2	0	1	0	0	0	0	1	0	0
ADC__chr1	0	0	0	0	0	0	0	0	0	0	0	0	0	0	0	0	0	0	0	0	0	0	1	0	0	2	1	0	0	0	0	0	0	0	0	0	0	1	0	0	0	0	0	0	0	0	0	0	0
ADD1__chr4	8.01	7.01	9.01	2	0	4	7.01	2	9.01	0	6	13.02	2	3	11.01	10.01	0	7.01	4	5	3	1	4	2	8.01	6	12.02	6	5	11.01	10.01	13.02	8.01	2	16.03	6	6	9.01	7.01	8.01	5	18.04	6	16.03	0	0	3	4	9.01
ADD2__chr2	0	1	1	2	0	0	1	0	1	0	0	0	0	2	0	0	0	1	2	0	0	1	0	0	2	0	1	0	0	0	1	2	4	1	1	1	1	1	1	3	1	2	1	2	0	1	1	0	2
ADD3__chr10	0	2	8.01	0	0	3	1	1	7.01	0	0	4	0	0	1	4	0	4	4	1	0	0	2	1	0	0	2	7.01	1	12.02	2	5	0	0	6	1	3	4	6	6	1	6	1	1	0	0	2	1	4
ADH4__chr4	0	0	0	0	0	0	0	0	0	0	0	0	0	0	0	0	0	0	0	0	0	1	0	0	0	0	0	1	0	0	0	0	0	0	0	1	3	0	0	0	0	0	1	0	0	0	0	0	0
ADH5__chr4	6	15.03	17.03	5	0	6	4	2	11.01	1	13.02	24.07	3	5	9.01	8.01	0	11.01	8.01	4	4	1	8.01	4	13.02	9.01	9.01	17.03	11.01	29.1	12.02	11.01	14.02	7.01	21.05	12.02	12.02	10.01	19.04	16.03	8.01	15.03	9.01	19.04	0	3	11.01	10.01	18.04
ADH6__chr4	0	0	0	0	0	0	0	0	0	0	0	0	0	0	0	0	0	0	0	0	0	0	0	0	0	0	0	0	0	0	0	0	0	0	0	0	0	0	0	0	0	0	0	0	0	0	0	0	0
ADHFE1__chr8	0	0	0	0	0	0	0	0	0	0	0	0	0	0	0	0	0	0	0	0	0	0	0	0	0	0	0	0	0	0	0	0	0	0	0	0	0	0	0	1	0	0	0	0	0	0	0	0	0
ADI1__chr2	4	2	8.01	0	0	3	7.01	2	5	0	4	10.01	1	6	4	5	0	3	5	2	0	0	2	5	4	3	6	11.01	1	13.02	10.01	7.01	10.01	2	7.01	3	10.01	6	16.03	4	8.01	10.01	11.01	3	0	0	0	2	4
ADIPOQ-AS1__chr3	0	0	1	0	0	0	0	0	0	0	0	0	0	0	0	0	0	0	0	0	0	0	0	0	0	0	0	0	0	0	1	1	0	0	0	0	0	0	0	0	0	0	0	0	0	0	0	0	0
ADIPOQ__chr3	0	0	0	0	0	0	0	0	0	0	0	0	0	0	0	0	0	0	0	0	0	0	0	0	0	0	0	0	0	0	0	0	0	0	0	0	0	0	0	0	0	0	0	0	0	0	0	0	0
ADIPOR1__chr1	5	3	3	1	0	4	7.01	1	4	0	5	14.02	3	3	11.01	4	0	1	0	3	0	0	2	1	7.01	4	7.01	6	5	12.02	9.01	9.01	14.02	2	5	4	5	4	7.01	5	4	1	6	5	0	0	3	3	8.01
ADIPOR2__chr12	1	0	2	1	0	3	5	1	5	0	4	1	1	3	3	6	0	3	0	0	2	3	2	1	5	1	1	3	2	7.01	3	6	6	1	9.01	0	3	1	3	2	2	4	0	3	0	0	5	2	3
ADK__chr10	3	6	4	0	0	7.01	4	5	9.01	0	9.01	14.02	3	3	7.01	3	0	1	7.01	6	2	0	1	4	3	1	9.01	4	1	16.03	14.02	5	6	4	8.01	8.01	3	14.02	8.01	13.02	7.01	7.01	3	8.01	0	0	7.01	1	13.02
ADM2__chr22	0	0	0	0	0	0	0	0	0	0	0	0	0	0	0	0	0	0	0	0	0	0	0	0	0	0	0	0	0	0	0	0	0	0	0	0	0	0	0	0	0	0	0	0	0	0	0	0	0
ADM5__chr19	0	0	1	0	0	1	0	0	0	0	0	0	1	0	0	0	0	1	0	0	0	1	0	0	2	0	0	0	0	0	0	3	0	0	0	0	0	0	0	0	0	1	0	0	0	0	0	0	1
ADM__chr11	0	0	2	0	0	2	0	1	1	0	0	6	1	1	5	0	0	1	1	1	0	0	0	2	1	0	7.01	2	1	1	3	0	2	0	4	2	0	1	0	6	1	1	1	2	0	0	0	3	1
ADNP2__chr18	1	0	3	0	0	1	1	0	2	0	2	2	1	2	4	4	0	0	3	0	0	0	2	0	0	1	3	2	1	10.01	2	2	2	1	4	3	9.01	0	6	0	6	2	0	2	0	0	1	0	0
ADNP__chr20	0	3	0	0	0	2	4	3	2	0	1	2	0	0	3	1	0	9.01	3	0	0	0	0	0	5	2	3	6	0	0	7.01	1	3	0	4	3	6	2	2	1	0	4	1	3	0	0	3	3	2
ADORA1__chr1	0	0	0	0	0	0	0	0	0	0	0	0	0	0	1	0	0	0	0	0	0	0	0	0	1	1	1	0	0	0	1	0	0	0	0	1	0	0	1	0	0	0	0	0	0	0	0	0	1
ADORA2A__chr22	0	0	0	0	0	0	0	0	0	0	0	0	0	0	0	0	0	0	0	0	0	0	0	0	0	0	0	0	0	0	0	0	0	0	0	0	0	0	0	0	0	0	0	0	0	0	0	0	0
ADORA2B__chr17	0	3	4	0	0	8.01	2	0	9.01	0	3	6	0	5	2	3	0	3	9.01	2	4	0	0	0	1	1	2	1	4	4	11.01	9.01	2	2	6	6	4	4	3	3	0	4	2	5	0	0	7.01	2	5
ADORA3__chr1	0	0	0	0	0	0	0	0	0	0	0	0	0	0	0	0	0	0	0	0	0	0	0	0	0	0	0	0	0	0	0	0	0	0	0	0	0	0	0	0	0	0	0	0	0	0	0	0	0
ADO__chr10	1	0	0	0	0	3	2	0	0	0	2	4	2	2	1	1	0	4	1	2	0	0	0	1	3	1	0	1	1	10.01	2	4	6	1	1	5	3	1	3	7.01	3	3	6	3	0	0	3	3	2
ADPGK__chr15	1	0	3	3	0	4	0	0	0	0	2	4	0	1	0	4	0	0	1	1	0	0	1	0	1	2	2	2	0	1	2	0	5	0	2	1	3	1	4	3	0	1	1	3	0	0	2	1	2
ADPRHL1__chr13	0	0	0	0	0	0	0	0	0	0	0	0	0	0	0	0	0	0	0	0	0	0	0	0	0	0	0	0	0	0	0	0	0	0	0	0	0	0	0	0	0	0	1	0	0	0	0	0	0
ADPRHL2__chr1	1	0	0	0	0	1	3	1	1	0	2	0	3	4	1	3	0	1	2	3	0	0	3	0	3	1	0	2	1	3	4	5	1	0	3	7.01	3	2	4	3	2	3	1	1	0	0	2	0	3
ADPRH__chr3	0	0	0	0	0	0	0	0	0	0	0	0	0	0	0	0	0	0	0	0	0	0	0	0	0	0	0	0	0	0	0	0	0	0	0	0	0	0	0	0	0	0	0	0	0	0	0	1	0
ADPRM__chr17	0	0	0	0	0	1	0	0	0	0	0	2	0	0	1	0	0	0	0	0	0	0	0	0	0	1	0	0	0	0	0	0	0	0	2	1	1	0	2	0	0	0	1	0	0	0	0	0	1
ADRA1B__chr5	0	0	0	0	0	0	0	0	0	0	1	0	0	0	0	0	0	0	1	0	0	0	0	0	0	0	0	0	0	0	0	0	0	0	0	0	0	0	0	0	0	0	0	0	0	0	0	0	0
ADRA2B__chr2	0	0	0	0	0	0	0	0	0	0	0	0	0	0	0	0	0	0	0	0	0	0	0	0	0	0	0	0	0	0	0	0	0	0	0	0	0	0	0	0	0	0	0	0	0	0	0	0	0
ADRA2C__chr4	0	0	0	0	0	0	0	0	0	0	0	0	0	0	0	0	0	0	0	0	0	0	0	0	0	0	0	0	0	0	0	0	0	0	0	0	0	0	0	0	0	0	0	0	0	0	0	0	0
ADRB1__chr10	0	0	0	0	0	0	0	0	0	0	0	0	0	0	0	0	0	0	0	0	0	0	0	0	0	0	0	0	0	0	0	0	0	0	0	0	0	0	0	0	0	0	0	0	0	0	0	0	0
ADRB2__chr5	1	0	0	1	0	0	0	0	1	0	0	0	0	1	1	0	0	2	0	0	0	0	0	1	1	0	0	0	4	1	0	3	2	0	0	0	3	0	9.01	3	1	0	2	1	0	0	1	5	1
ADRBK1__chr11	0	0	1	0	0	2	1	1	3	0	0	0	1	2	2	0	0	0	0	1	0	0	1	0	3	1	1	1	0	1	0	2	7.01	0	3	0	0	2	2	2	0	1	0	0	0	0	0	2	2
ADRBK2__chr22	0	0	0	0	0	0	0	0	0	0	0	0	0	0	0	0	0	0	0	0	0	0	0	0	0	0	0	0	0	0	0	0	0	0	0	0	0	0	0	0	0	0	0	0	0	0	0	0	0
ADRM1__chr20	0	1	1	0	0	3	4	0	1	0	0	0	0	2	1	4	0	3	3	1	0	0	1	0	5	1	4	1	2	2	4	4	7.01	0	1	0	5	1	4	5	1	2	7.01	7.01	0	0	1	1	1
ADSL__chr22	7.01	3	4	1	2	10.01	13.02	0	13.02	1	4	19.04	9.01	9.01	10.01	8.01	0	8.01	9.01	7.01	3	0	9.01	0	13.02	10.01	15.03	10.01	10.01	20.05	19.04	9.01	11.01	3	12.02	5	18.04	3	20.05	13.02	10.01	10.01	13.02	3	0	1	3	5	12.02
ADSSL1__chr14	0	0	0	0	0	0	0	0	0	0	0	0	0	0	0	0	0	0	0	0	0	0	0	0	0	0	0	0	0	0	0	0	0	0	0	0	0	0	0	0	0	0	0	0	0	0	0	0	0
ADSS__chr1	1	4	2	0	0	5	4	3	2	0	2	5	1	4	2	7.01	0	7.01	3	2	1	0	1	1	5	3	6	6	2	6	4	5	2	2	5	1	5	0	10.01	4	2	4	7.01	6	1	0	1	1	7.01
ADTRP__chr6	0	0	2	0	0	4	0	1	0	0	1	1	0	0	4	1	0	0	0	0	0	0	3	1	2	0	2	0	0	2	1	0	0	0	0	2	1	0	0	3	1	1	1	2	0	0	0	5	1
AEBP1__chr7	0	0	0	0	0	0	0	0	0	0	0	0	0	0	0	0	0	0	1	0	0	0	0	0	0	0	0	0	0	0	0	0	0	0	0	0	0	0	0	0	0	0	0	0	0	0	0	0	0
AEBP2__chr12	1	1	1	1	1	2	3	2	2	0	2	6	1	2	5	3	0	3	1	0	1	0	5	0	0	2	1	1	1	6	1	1	2	2	3	3	1	0	1	4	1	6	1	4	0	0	0	4	4
AEN__chr15	1	2	4	0	0	0	1	0	3	0	3	4	0	1	2	1	0	2	3	1	1	0	0	0	0	1	1	0	1	3	1	1	1	0	0	1	0	0	1	3	0	2	3	4	0	0	0	0	4
AES__chr19	8.01	9.01	6	3	0	8.01	13.02	6	22.06	1	8.01	19.04	9.01	10.01	23.06	8.01	0	18.04	11.01	2	4	0	5	2	12.02	16.03	19.04	4	8.01	31.11	31.11	27.09	20.05	1	24.07	11.01	10.01	17.03	37.16	20.05	2	24.07	12.02	29.1	0	0	4	14.02	19.04
AFAP1-AS1__chr4	0	0	0	0	0	0	0	0	1	0	0	0	0	0	0	0	0	0	0	0	0	0	0	0	0	0	0	0	0	0	0	0	0	0	0	0	0	0	0	0	0	0	0	0	0	0	0	0	0
AFAP1L1__chr5	0	0	0	0	0	0	0	0	1	1	0	0	0	0	1	0	0	3	2	0	0	0	0	0	0	0	1	1	0	1	0	0	0	0	0	0	1	1	6	6	0	2	0	0	0	0	0	0	0
AFAP1L2__chr10	0	0	0	0	0	0	0	0	0	0	0	0	0	0	0	0	0	0	0	0	0	0	0	0	0	0	0	0	0	0	0	0	0	0	0	0	0	0	0	0	0	0	0	0	0	0	0	0	0
AFAP1__chr4	0	4	4	2	0	10.01	9.01	6	5	0	2	11.01	2	7.01	6	7.01	0	2	8.01	1	0	0	6	0	6	2	4	6	3	16.03	10.01	5	12.02	2	8.01	3	3	5	18.04	6	4	15.03	4	10.01	0	0	2	1	7.01
AFF1__chr4	0	0	1	1	0	2	1	1	0	0	1	3	1	2	3	2	0	1	2	2	0	0	0	0	0	1	1	2	1	2	6	1	0	1	6	1	2	3	8.01	4	1	2	0	1	0	0	1	0	1
AFF2__chrX	0	0	1	0	0	0	0	0	0	0	0	0	0	0	0	0	0	0	0	0	0	0	0	0	0	0	0	0	0	0	0	0	0	0	0	0	0	0	0	0	0	0	0	0	0	0	0	0	0
AFF3__chr2	0	1	0	0	0	0	0	0	1	0	0	1	1	0	2	0	0	0	0	1	0	0	0	0	2	1	0	3	0	4	2	0	0	0	5	0	0	2	0	3	0	1	0	1	0	0	1	0	1
AFF4__chr5	3	3	4	1	0	0	2	1	2	0	6	6	2	5	6	0	0	1	1	0	0	0	6	2	3	1	0	5	1	5	5	4	4	1	4	3	5	3	6	2	0	6	3	2	0	0	0	1	1
AFG3L1P__chr16	0	1	0	2	0	1	1	2	1	0	0	0	0	0	2	3	0	0	0	2	1	0	1	0	0	1	0	0	0	2	1	1	1	0	2	0	1	0	1	1	0	4	1	0	0	0	0	3	1
AFG3L2__chr18	3	4	5	1	0	6	2	2	3	0	2	8.01	2	3	9.01	1	0	4	2	2	1	0	2	0	3	2	8.01	4	2	12.02	5	4	3	2	3	4	2	3	10.01	8.01	1	4	3	2	0	0	1	1	7.01
AFMID__chr17	0	0	0	0	0	1	0	0	0	0	0	1	0	0	0	0	0	1	0	0	0	0	1	0	0	0	1	1	0	1	0	0	0	0	0	0	0	0	1	0	0	0	0	0	0	0	0	0	0
AFP__chr4	0	0	0	0	0	0	0	0	2	0	0	0	0	0	0	0	0	0	0	0	0	0	0	0	0	1	0	0	0	1	0	0	0	0	0	0	0	0	0	0	0	0	0	0	0	0	0	0	0
AFTPH__chr2	0	0	1	3	0	2	2	3	1	0	1	3	3	1	1	0	0	0	1	2	0	0	2	1	2	2	1	3	2	3	4	1	2	1	1	2	4	1	1	0	0	1	2	0	0	0	0	0	0
AGAP11__chr10	0	0	0	0	0	0	0	0	0	0	0	0	0	0	0	0	0	0	0	0	0	0	0	0	0	0	0	0	0	0	0	0	0	0	0	0	0	0	0	0	0	0	0	0	0	0	0	0	0
AGAP1__chr2	1	0	0	0	0	1	0	1	0	0	1	1	1	0	2	0	0	0	1	3	0	1	2	0	0	1	0	0	0	2	7.01	3	2	0	1	0	1	0	0	3	1	2	0	0	0	0	1	1	2
AGAP2__chr12	0	0	0	0	0	0	0	0	0	0	0	0	0	0	0	0	0	0	0	0	0	0	0	0	0	0	0	0	0	0	0	0	0	0	0	0	0	0	0	0	0	0	0	0	0	0	0	0	0
AGAP3__chr7	0	1	0	0	0	2	2	0	0	0	3	1	0	0	4	1	0	1	0	0	0	0	2	1	0	1	6	0	1	3	1	8.01	6	0	3	1	4	2	5	4	0	4	2	2	0	0	0	0	2
AGAP5__chr10	0	0	0	0	0	0	0	0	0	0	0	0	0	0	0	0	0	0	0	0	0	0	0	0	0	0	0	0	0	0	0	0	0	0	0	0	0	0	0	0	0	0	0	0	0	0	0	0	0
AGAP6__chr10	0	0	0	0	0	0	0	0	0	0	0	0	0	0	0	0	0	0	0	0	0	0	0	0	0	0	0	0	0	0	0	0	0	0	0	0	0	0	0	0	0	0	0	0	0	0	0	0	0
AGA__chr4	1	0	1	0	0	0	3	0	1	0	1	1	0	1	0	0	0	1	0	0	0	1	0	0	0	1	0	0	0	0	1	1	0	1	1	4	0	1	3	2	2	0	1	0	0	0	0	0	1
AGBL2__chr11	0	0	0	0	0	0	0	0	0	0	0	0	0	0	0	0	0	0	0	0	0	0	0	0	0	0	0	0	0	0	0	0	0	0	0	0	0	0	0	1	0	0	0	0	0	0	0	0	0
AGBL3__chr7	0	0	0	0	0	0	0	0	0	0	0	0	0	0	0	0	0	0	0	0	0	0	0	0	0	0	0	0	0	0	0	0	0	0	1	0	0	0	0	0	0	0	0	0	0	0	0	0	0
AGBL5__chr2	1	1	0	0	0	0	0	0	0	0	0	2	0	0	0	0	0	2	1	1	0	0	0	0	2	3	0	2	0	1	3	0	3	0	1	1	2	0	1	2	1	5	0	0	0	0	0	0	1
AGER__chr6	0	0	0	0	0	0	0	0	1	0	0	0	0	0	0	0	0	0	0	0	0	0	0	0	0	0	2	0	0	0	0	1	0	0	0	0	0	0	0	0	0	0	0	0	0	0	0	0	0
AGFG1__chr2	1	4	5	0	0	3	3	5	4	0	2	5	1	4	3	5	0	1	0	2	2	0	3	0	2	4	5	5	3	8.01	8.01	5	7.01	1	8.01	1	7.01	2	5	5	2	7.01	0	10.01	0	0	1	3	2
AGFG2__chr7	1	0	1	0	0	0	0	0	1	0	0	1	0	0	0	1	0	0	0	0	0	0	1	0	0	0	0	0	0	1	1	0	2	0	0	0	0	1	0	0	0	1	0	0	0	0	0	0	0
AGGF1__chr5	0	1	3	2	0	2	0	0	1	0	1	5	1	1	2	0	0	3	1	1	1	1	0	1	0	0	0	2	0	1	4	3	1	0	0	0	2	2	1	2	2	3	3	3	0	0	2	0	1
AGK__chr7	0	1	1	3	0	0	4	1	0	0	2	2	1	2	5	0	0	1	3	1	0	0	1	0	1	1	0	1	0	2	2	1	3	1	4	4	2	0	4	1	0	0	2	1	0	0	1	0	2
AGL__chr1	2	0	0	0	0	0	0	0	0	0	0	0	1	0	0	1	0	1	0	0	1	0	1	0	1	0	0	0	0	0	3	0	0	0	1	0	0	0	2	2	0	1	1	1	0	0	0	1	1
AGMAT__chr1	1	0	0	1	0	0	0	0	0	0	0	0	0	0	0	0	0	0	0	0	0	0	0	0	0	0	0	0	0	0	0	1	0	0	1	0	0	0	1	0	0	0	0	1	0	0	0	0	0
AGMO__chr7	0	0	0	0	0	0	0	0	0	0	0	0	0	0	0	0	0	0	0	0	0	0	0	0	0	0	0	0	0	0	0	0	0	0	0	0	0	0	0	1	0	0	0	0	0	0	0	0	0
AGPAT1__chr6	0	1	0	0	0	3	1	1	0	0	0	4	2	1	7.01	2	0	2	3	0	0	0	0	0	2	2	0	3	1	6	5	5	8.01	0	4	1	1	3	2	5	0	4	1	5	0	0	0	3	3
AGPAT2__chr9	1	1	1	0	0	1	1	0	0	0	0	0	0	0	0	1	0	0	1	0	0	0	1	0	0	0	1	1	0	0	0	0	4	0	2	0	0	0	2	0	0	1	1	0	0	0	0	0	0
AGPAT3__chr21	2	2	2	1	1	0	4	2	8.01	0	4	6	2	3	5	2	0	5	4	0	0	0	4	0	3	2	4	1	1	8.01	5	3	7.01	1	11.01	2	5	3	4	5	1	4	3	6	0	0	3	1	1
AGPAT4-IT1__chr6	0	0	0	0	0	0	0	0	1	0	0	0	0	0	0	0	0	1	0	0	0	0	0	0	0	0	0	0	0	0	2	2	0	0	2	0	0	0	0	0	0	0	0	2	0	0	0	0	0
AGPAT4__chr6	0	0	0	0	0	0	0	0	1	0	0	0	0	1	2	0	0	0	1	0	1	0	0	0	0	0	0	0	0	0	1	2	1	0	1	0	1	0	3	1	0	1	0	1	0	0	0	0	0
AGPAT5__chr8	0	3	4	2	0	3	7.01	0	5	0	2	8.01	1	3	5	4	0	10.01	1	3	0	1	2	4	3	1	2	7.01	3	10.01	7.01	10.01	5	3	6	7.01	4	1	10.01	9.01	6	5	3	7.01	0	0	2	1	6
AGPAT6__chr8	0	4	0	0	0	1	1	2	2	0	2	0	2	5	3	1	0	5	4	0	2	1	3	0	6	2	2	2	1	7.01	3	6	3	1	2	2	4	1	7.01	2	0	3	2	3	0	0	1	0	0
AGPAT9__chr4	1	1	0	1	0	4	5	2	4	0	3	5	0	2	1	1	0	4	3	0	1	0	0	0	0	0	0	0	4	1	1	4	4	1	4	2	0	3	4	2	3	1	2	6	0	1	2	2	1
AGPHD1__chr15	0	0	0	0	0	0	0	0	0	0	0	0	0	0	0	0	0	0	0	0	0	0	0	0	0	0	0	0	0	0	0	0	0	0	0	0	0	0	1	0	0	0	0	0	0	0	0	0	0
AGPS__chr2	0	1	4	1	0	5	4	7.01	2	0	0	6	1	8.01	3	6	0	0	2	1	0	0	2	1	8.01	2	2	6	3	14.02	11.01	4	8.01	4	7.01	3	5	2	7.01	6	1	5	2	7.01	0	0	3	2	3
AGRN__chr1	0	4	2	2	0	2	2	0	3	0	4	7.01	3	2	9.01	2	0	0	5	2	0	0	0	2	2	1	6	5	1	7.01	5	4	4	0	6	4	6	2	3	7.01	3	4	4	6	1	0	1	0	5
AGTPBP1__chr9	0	0	0	0	0	0	1	1	0	0	1	2	2	0	0	0	0	0	0	2	0	0	1	0	0	0	1	0	2	1	0	0	1	1	0	0	1	1	0	1	0	2	0	0	0	0	0	0	0
AGTR1__chr3	0	0	0	0	0	0	0	0	0	0	0	0	0	0	0	0	0	0	0	0	0	0	0	0	0	0	0	0	0	0	0	0	0	0	0	0	0	0	0	0	0	0	0	0	0	0	0	0	0
AGTRAP__chr1	1	0	0	0	0	1	1	0	1	0	1	1	2	0	1	1	1	1	1	1	0	0	0	0	1	2	1	0	0	3	5	1	1	0	0	1	3	0	4	2	0	4	0	3	0	0	1	0	0
AGXT2L2__chr5	0	0	0	0	0	0	0	0	0	0	0	2	0	0	0	0	0	0	0	0	0	0	0	0	0	0	0	0	0	0	0	0	0	0	0	0	0	0	0	0	0	1	0	0	0	0	0	1	1
AHCTF1__chr1	3	2	7.01	2	0	4	2	3	9.01	1	2	7.01	2	3	7.01	4	0	1	2	3	2	2	11.01	2	7.01	2	6	8.01	1	5	8.01	4	3	3	10.01	3	4	0	8.01	13.02	6	4	2	10.01	0	0	10.01	2	2
AHCYL1__chr1	5	4	7.01	3	0	3	5	3	3	0	3	4	3	13.02	5	7.01	0	5	3	3	4	2	3	1	6	6	11.01	7.01	5	12.02	19.04	8.01	10.01	1	14.02	4	11.01	7.01	13.02	10.01	6	12.02	6	10.01	0	0	4	7.01	4
AHCYL2__chr7	0	1	0	0	0	0	0	0	0	0	0	0	0	0	2	0	0	0	0	0	0	0	0	0	0	0	0	0	0	0	0	0	0	0	0	0	0	0	0	0	0	0	0	0	0	0	0	0	0
AHCY__chr20	0	1	2	1	0	3	3	3	7.01	0	2	5	1	5	13.02	4	0	5	5	1	2	1	3	1	2	6	7.01	8.01	3	12.02	12.02	12.02	9.01	1	9.01	0	8.01	1	7.01	11.01	2	7.01	2	3	0	0	2	2	6
AHDC1__chr1	0	0	0	0	0	0	0	0	1	0	0	1	0	1	2	0	0	0	0	1	0	0	0	0	0	0	0	1	0	2	0	1	1	0	0	1	1	0	0	1	0	0	0	0	0	0	0	0	1
AHI1__chr6	1	1	5	0	0	9.01	3	0	1	0	1	3	0	3	3	2	0	4	1	0	1	0	0	0	4	0	3	1	1	2	11.01	5	3	0	3	0	0	2	3	3	2	5	2	1	0	0	3	1	3
AHNAK2__chr14	0	5	2	2	0	3	4	3	2	0	1	10.01	1	1	9.01	5	0	1	4	2	1	0	6	0	2	3	3	3	2	3	7.01	1	6	2	7.01	1	3	7.01	9.01	9.01	1	10.01	9.01	3	0	1	1	1	5
AHNAK__chr11	16.03	6	27.09	13.02	0	16.03	20.05	8.01	25.07	1	16.03	29.1	9.01	15.03	28.09	19.04	1	21.05	22.06	8.01	6	0	5	8.01	17.03	20.05	24.07	15.03	11.01	43.22	21.05	37.16	42.21	5	25.07	15.03	18.04	14.02	38.17	31.11	8.01	31.11	39.18	39.18	0	0	15.03	16.03	38.17
AHRR__chr5	1	1	1	0	0	1	0	0	1	0	0	0	0	1	0	0	0	1	2	0	0	0	0	0	0	2	0	2	0	0	2	2	2	0	0	0	0	0	0	0	0	0	0	1	0	0	0	0	1
AHR__chr7	0	0	4	3	0	4	1	0	1	0	0	6	0	2	1	0	0	1	2	0	2	0	6	0	0	1	0	2	0	3	2	1	2	0	6	3	1	2	3	3	0	2	0	1	0	0	3	1	1
AHSA1__chr14	1	2	6	2	0	4	1	0	5	0	7.01	7.01	0	7.01	10.01	5	0	7.01	4	1	2	0	3	0	4	7.01	10.01	2	1	5	13.02	13.02	8.01	0	9.01	2	4	3	9.01	7.01	4	6	6	5	0	0	2	2	9.01
AHSA2__chr2	0	1	0	1	0	1	1	0	0	0	2	1	0	0	1	0	0	1	0	1	0	0	0	1	2	1	1	2	0	1	2	2	2	2	0	1	0	0	0	1	0	1	0	2	0	1	0	1	0
AICDA__chr12	0	0	0	0	0	0	0	0	0	0	0	0	0	0	0	0	0	0	0	0	0	0	0	0	0	0	0	0	0	0	0	1	0	0	0	0	0	0	0	0	0	0	0	0	0	0	0	0	0
AIDA__chr1	6	10.01	24.07	6	1	10.01	14.02	6	9.01	0	9.01	22.06	9.01	12.02	10.01	11.01	0	5	6	6	4	3	5	4	9.01	8.01	10.01	8.01	8.01	21.05	19.04	17.03	11.01	4	33.13	9.01	10.01	13.02	22.06	26.08	11.01	22.06	7.01	13.02	0	0	10.01	11.01	16.03
AIF1L__chr9	0	0	0	0	0	0	0	0	0	0	0	0	0	0	0	0	0	0	0	0	0	0	0	0	0	0	1	0	0	0	0	0	0	0	0	0	0	0	0	0	0	0	0	0	0	0	0	0	0
AIFM1__chrX	0	1	1	1	0	2	1	1	0	0	2	2	0	0	2	0	0	0	0	1	1	0	0	0	2	0	1	0	2	6	2	1	1	0	4	0	4	0	0	1	0	1	1	2	0	0	3	0	0
AIFM2__chr10	2	3	2	1	0	0	4	0	1	0	1	0	2	2	2	2	0	1	0	3	2	0	0	0	4	0	2	1	1	3	2	5	6	0	3	0	1	1	2	0	0	2	3	1	0	0	0	1	4
AIG1__chr6	1	1	1	0	0	1	1	0	0	0	2	4	0	0	2	1	0	1	0	0	0	0	0	0	0	1	0	0	0	2	2	1	1	1	3	4	0	1	0	3	2	1	0	2	0	0	0	1	1
AIM1L__chr1	0	0	0	0	0	0	0	0	0	0	0	0	0	0	0	0	0	0	0	0	0	0	0	0	0	0	0	0	0	0	0	0	0	0	0	0	0	0	0	0	1	0	0	0	0	0	0	0	0
AIM1__chr6	0	0	0	0	0	0	0	0	0	0	0	0	0	0	0	0	0	0	0	0	0	0	0	0	0	0	0	0	0	0	0	0	0	0	0	0	0	0	0	0	0	0	0	0	0	0	0	0	0
AIM2__chr1	0	0	0	0	0	0	0	0	0	0	0	0	0	0	0	0	0	0	0	0	0	0	0	0	0	0	0	0	0	0	0	0	0	0	0	0	0	0	0	0	0	0	0	0	0	0	0	0	0
AIMP1__chr4	1	0	3	1	0	7.01	3	1	7.01	0	2	4	1	3	4	3	0	2	2	4	0	1	1	1	3	3	3	5	4	8.01	6	8.01	10.01	1	2	1	3	3	3	4	5	2	0	2	0	0	4	1	5
AIMP2__chr7	1	0	0	0	0	2	0	0	0	0	1	1	1	1	0	0	0	0	0	1	2	0	0	1	0	1	0	1	0	1	1	2	1	0	0	1	0	1	1	0	1	1	1	0	0	0	0	0	1
AIPL1__chr17	0	0	0	0	0	0	0	0	0	0	0	0	0	0	0	0	0	0	0	0	0	0	0	0	0	0	0	0	0	0	0	0	0	0	0	0	0	0	0	0	0	0	0	1	0	0	0	0	0
AIP__chr11	0	1	1	0	0	1	1	0	2	0	2	1	0	4	0	3	0	0	1	0	0	0	0	1	1	0	1	0	1	0	1	1	2	0	1	1	2	3	3	1	1	4	3	4	0	0	1	3	2
AIRE__chr21	0	0	0	0	0	0	0	0	0	0	0	0	0	0	0	0	0	0	0	0	0	0	0	0	0	0	0	0	0	0	0	0	0	0	0	0	0	0	0	0	0	0	0	0	0	0	0	0	0
AJUBA__chr14	2	1	0	0	0	2	3	1	2	0	4	3	0	2	4	3	0	2	1	2	1	0	0	0	1	2	2	2	2	11.01	4	7.01	3	1	0	2	1	4	3	2	2	4	2	3	1	0	3	5	1
AK1__chr9	1	0	0	0	0	0	1	2	0	0	1	4	0	1	3	0	0	0	0	1	0	1	1	0	0	1	1	0	1	1	2	0	1	0	4	2	1	0	2	2	0	1	1	4	0	0	1	0	1
AK2__chr1	4	5	2	2	0	5	5	1	9.01	1	5	11.01	1	8.01	12.02	5	0	3	2	3	2	1	3	3	4	4	9.01	11.01	1	15.03	6	3	8.01	3	3	5	5	3	11.01	8.01	1	2	8.01	13.02	0	0	4	2	4
AK3__chr9	0	2	4	2	0	0	11.01	1	6	0	4	7.01	0	2	6	3	0	1	4	1	0	0	3	0	6	3	8.01	5	1	12.02	6	10.01	6	2	6	3	6	4	10.01	4	7.01	5	3	9.01	0	0	4	2	3
AK4__chr1	0	2	0	0	0	0	0	0	0	0	0	1	0	1	1	0	0	0	0	0	0	0	0	0	2	0	1	0	0	1	0	0	2	0	0	1	0	0	0	0	0	1	1	0	0	0	0	0	0
AK5__chr1	0	2	1	0	0	2	2	0	2	0	2	8.01	4	2	9.01	4	0	4	0	0	0	2	0	2	2	0	3	3	4	7.01	8.01	12.02	4	0	7.01	2	2	3	4	5	2	3	3	9.01	0	1	2	1	6
AK8__chr9	0	0	0	0	0	0	0	0	0	0	0	0	0	0	0	0	0	0	0	0	0	0	0	0	0	0	0	0	0	0	0	0	0	0	0	0	0	0	0	0	0	0	0	0	0	0	0	0	0
AKAP10__chr17	1	0	0	0	0	0	0	0	0	0	1	1	0	0	1	0	0	0	3	1	0	0	1	1	1	0	0	3	1	1	0	0	1	0	2	0	0	0	1	1	1	1	0	2	0	0	2	0	3
AKAP11__chr13	1	0	3	2	0	4	5	0	1	0	1	9.01	2	1	4	3	0	3	2	2	0	0	2	1	4	1	1	5	2	6	3	5	1	1	8.01	2	6	4	6	3	2	5	3	2	0	0	1	2	2
AKAP12__chr6	2	2	13.02	3	0	16.03	13.02	5	14.02	1	3	22.06	0	15.03	30.11	4	0	11.01	18.04	5	7.01	3	5	4	10.01	1	19.04	9.01	8.01	19.04	17.03	3	5	4	14.02	5	11.01	8.01	32.12	21.05	2	14.02	4	17.03	1	0	4	9.01	9.01
AKAP13__chr15	0	0	2	1	0	2	1	1	3	0	0	0	1	0	0	0	0	2	4	0	0	0	2	4	0	3	1	2	0	1	1	1	2	1	2	1	1	1	12.02	3	0	6	3	5	0	0	1	0	2
AKAP14__chrX	0	0	0	0	0	0	0	0	0	0	0	0	0	0	0	0	0	0	0	0	0	0	0	0	0	0	0	0	0	0	0	0	0	0	0	0	0	0	0	0	0	0	0	0	0	0	0	0	0
AKAP1__chr17	1	1	0	0	0	0	1	0	0	0	0	0	0	1	1	2	0	1	0	0	0	0	0	0	0	0	1	1	1	2	1	2	2	0	0	1	0	0	2	0	0	0	0	1	0	0	0	0	0
AKAP3__chr12	0	0	0	0	0	0	0	0	0	0	0	0	0	0	0	0	0	0	0	0	0	0	1	0	0	0	0	0	0	0	0	0	0	0	0	0	0	0	0	0	0	0	0	0	0	0	0	0	0
AKAP5__chr14	0	0	0	0	0	0	0	0	0	0	2	1	1	0	1	0	0	0	0	0	0	0	0	0	1	0	0	1	0	2	1	0	0	0	0	0	0	0	0	1	0	1	2	0	0	0	0	0	0
AKAP6__chr14	0	0	0	0	0	0	0	0	0	0	0	0	0	0	0	0	0	0	0	0	0	0	0	0	0	0	0	0	0	0	0	0	0	0	0	0	0	0	0	1	0	0	0	0	0	0	0	0	0
AKAP7__chr6	0	0	1	0	0	0	0	0	0	0	0	1	0	0	1	1	0	1	0	0	0	0	0	0	0	0	0	0	0	3	1	0	2	0	1	1	1	0	0	0	1	0	0	0	0	0	0	0	0
AKAP8L__chr19	1	0	0	0	0	0	0	0	0	0	0	2	0	0	0	0	0	1	1	1	0	0	0	0	0	1	1	0	0	0	1	0	2	0	1	0	0	0	0	0	0	0	0	0	0	0	0	0	0
AKAP8__chr19	0	1	1	1	0	3	1	0	2	1	1	0	1	2	2	2	0	2	5	0	0	0	2	1	0	1	1	0	0	1	2	2	3	1	3	3	2	0	2	6	0	1	0	2	0	0	0	1	4
AKAP9__chr7	2	1	4	2	1	2	4	3	2	0	0	5	2	4	2	2	0	5	9.01	1	0	0	3	1	3	3	4	1	3	1	6	2	4	1	2	2	3	6	6	4	3	3	1	2	0	1	4	3	2
AKD1__chr6	0	0	1	0	0	0	0	0	0	0	0	2	0	0	0	0	0	0	1	0	0	0	0	0	0	0	1	0	1	0	0	0	0	1	0	0	1	0	0	0	0	1	1	0	0	0	0	0	0
AKIP1__chr11	0	3	0	0	0	2	1	0	1	0	1	2	0	2	1	0	0	2	2	0	0	1	0	0	0	2	4	0	0	4	7.01	3	1	0	2	0	1	1	3	0	0	2	2	2	0	0	1	2	2
AKIRIN1__chr1	3	6	5	1	0	5	3	2	4	0	2	8.01	2	7.01	7.01	4	0	3	6	6	2	0	8.01	1	5	1	5	5	1	9.01	6	5	7.01	0	5	7.01	3	1	9.01	3	5	4	3	4	0	0	3	0	8.01
AKIRIN2__chr6	4	2	4	2	0	6	1	4	3	1	4	4	1	4	0	1	0	0	0	5	0	1	3	1	0	1	2	1	2	6	9.01	12.02	3	2	6	10.01	5	4	8.01	5	2	1	6	9.01	1	0	7.01	5	1
AKNAD1__chr1	0	0	0	0	0	0	0	0	0	0	0	0	0	0	0	0	0	0	0	0	0	0	0	0	0	0	0	0	0	0	0	0	0	0	0	0	0	0	0	0	0	0	0	0	0	0	0	0	0
AKNA__chr9	0	2	0	0	0	1	0	0	0	0	1	0	0	0	0	0	0	0	0	1	0	0	0	0	0	1	0	0	0	1	1	0	3	0	0	0	0	0	0	1	0	0	0	0	0	0	0	0	2
AKR1A1__chr1	1	2	2	1	0	2	3	0	2	0	1	3	1	2	1	3	0	3	1	2	2	1	1	0	1	8.01	1	2	2	5	1	4	4	0	6	1	3	7.01	6	3	2	3	8.01	9.01	0	0	1	2	4
AKR1B10__chr7	0	0	0	0	0	0	0	0	0	0	0	0	0	0	0	0	0	0	0	0	0	0	0	0	0	0	0	0	0	0	0	0	0	0	0	0	0	0	0	0	0	0	0	0	0	0	0	0	0
AKR1B15__chr7	0	0	0	0	0	0	0	0	0	0	0	0	0	0	0	0	0	0	0	0	0	0	0	0	0	0	0	0	0	0	0	0	0	0	0	0	0	0	0	0	0	0	0	0	0	0	0	0	0
AKR1B1__chr7	4	7.01	7.01	5	0	17.03	4	2	6	0	1	12.02	7.01	7.01	7.01	7.01	0	3	3	3	1	0	3	3	12.02	7.01	6	13.02	2	19.04	10.01	17.03	9.01	1	13.02	5	12.02	2	11.01	12.02	4	7.01	9.01	12.02	0	1	3	5	11.01
AKR1C2__chr10	0	0	0	0	0	0	0	0	0	0	0	0	0	0	0	0	0	0	0	0	0	0	0	0	0	0	0	0	0	0	1	0	0	0	0	0	0	0	0	0	0	0	0	0	0	0	0	0	0
AKR1C3__chr10	0	0	0	0	0	0	0	0	0	0	0	1	0	0	0	0	0	0	0	0	0	0	0	0	0	0	0	0	0	0	0	0	0	0	0	0	0	0	0	1	0	0	0	0	0	0	0	0	0
AKR1D1__chr7	0	0	0	0	0	0	0	0	0	0	0	0	0	0	0	0	0	0	0	0	0	0	0	0	0	0	0	0	0	0	0	0	0	0	0	0	0	0	0	0	0	0	0	0	0	0	0	0	0
AKR7A2P1__chr1	0	0	0	0	0	0	0	0	0	0	0	0	0	0	0	0	0	0	0	0	0	0	0	0	0	0	0	0	0	0	0	0	0	0	0	0	0	0	0	0	0	0	0	0	0	0	0	0	0
AKR7A2__chr1	1	0	0	0	0	1	1	3	0	0	1	3	0	1	4	1	0	2	3	1	1	0	4	0	4	2	0	3	6	7.01	4	4	3	1	3	3	0	1	1	4	2	5	2	3	0	1	3	1	1
AKR7L__chr1	0	0	0	0	0	0	0	0	0	0	0	0	0	0	0	0	0	0	0	0	0	0	0	0	0	0	0	0	0	0	0	1	0	0	0	0	0	0	0	0	0	0	0	0	0	0	0	0	0
AKT1S1__chr19	0	0	1	1	0	1	2	1	5	0	4	8.01	2	1	8.01	0	0	2	0	1	1	0	1	0	7.01	8.01	5	2	1	6	4	4	11.01	0	9.01	2	6	4	5	4	0	13.02	3	10.01	0	0	0	1	1
AKT1__chr14	3	6	9.01	3	0	5	5	1	9.01	0	4	4	4	6	6	4	0	7.01	5	3	1	0	7.01	2	6	1	3	2	1	4	11.01	9.01	19.04	4	9.01	5	6	3	9.01	9.01	7.01	5	4	14.02	0	0	2	1	0
AKT2__chr19	1	0	0	1	0	3	3	1	4	0	2	4	1	2	6	2	0	2	4	3	0	1	0	4	1	3	1	4	1	7.01	7.01	10.01	5	2	8.01	3	1	2	4	12.02	0	4	6	9.01	0	0	2	2	5
AKT3__chr1	2	1	5	2	0	3	0	2	6	1	0	6	3	4	4	4	0	4	1	1	0	0	3	1	4	4	1	3	0	0	7.01	3	5	5	4	3	1	2	5	6	0	4	3	3	0	0	7.01	1	3
AKTIP__chr16	0	0	0	0	0	0	1	1	0	0	0	1	0	0	0	0	0	2	2	0	0	0	1	0	1	2	2	0	0	3	1	1	1	0	2	2	1	2	1	1	1	0	0	1	0	0	0	0	0
ALAD__chr9	1	1	1	3	0	0	1	0	0	0	1	2	2	1	1	2	0	2	1	3	0	0	0	0	0	4	2	0	1	3	1	2	0	4	4	3	1	2	3	2	1	0	4	4	0	0	0	2	8.01
ALAS1__chr3	0	2	2	1	0	0	3	0	2	0	1	6	0	1	1	0	0	0	1	0	0	0	1	0	0	0	2	2	0	4	2	2	3	2	0	1	1	1	1	0	0	0	1	0	0	0	1	1	2
ALCAM__chr3	17.03	24.07	34.14	13.02	0	23.06	31.11	10.01	21.05	0	19.04	61.45	9.01	24.07	21.05	23.06	0	27.09	9.01	18.04	4	1	20.05	11.01	24.07	14.02	13.02	22.06	10.01	51.31	53.34	53.34	43.22	13.02	54.35	15.03	21.05	19.04	70.6	44.23	20.05	49.29	47.27	41.2	2	1	29.1	11.01	20.05
ALDH16A1__chr19	1	1	0	0	0	0	0	1	1	0	1	0	0	0	2	0	0	2	2	1	0	0	0	0	1	1	1	0	2	2	0	2	4	0	0	1	0	1	2	0	2	1	1	1	0	0	0	0	1
ALDH18A1__chr10	1	2	2	0	0	4	6	4	1	0	1	10.01	1	3	10.01	5	0	4	2	1	4	0	5	1	3	4	6	7.01	4	12.02	1	6	6	2	12.02	4	3	4	3	2	2	2	4	8.01	0	0	3	0	4
ALDH1A1__chr9	0	0	0	0	0	0	0	0	0	0	0	0	0	0	0	0	0	0	0	0	0	0	0	0	0	0	0	0	0	0	0	0	0	0	0	0	0	0	0	0	0	0	0	0	0	0	0	0	0
ALDH1A3__chr15	2	3	13.02	6	0	4	1	7.01	3	0	2	15.03	8.01	16.03	16.03	7.01	0	7.01	12.02	4	3	1	3	2	8.01	2	12.02	7.01	6	58.41	11.01	3	2	1	12.02	7.01	7.01	16.03	12.02	11.01	8.01	10.01	2	21.05	1	0	5	1	4
ALDH1B1__chr9	0	1	0	0	0	2	0	0	0	0	0	2	0	0	2	1	0	0	1	0	0	0	0	0	2	0	3	0	0	5	1	1	2	0	2	1	1	0	1	1	0	2	0	0	0	0	1	0	0
ALDH1L2__chr12	0	0	0	0	0	0	0	0	0	0	0	0	0	0	0	0	0	0	0	0	0	0	0	0	0	0	0	0	0	0	0	0	0	0	0	0	0	0	0	0	0	0	0	0	0	0	0	0	0
ALDH2__chr12	0	1	0	0	0	0	0	0	0	0	0	0	0	0	2	0	0	0	0	0	1	0	1	0	2	1	1	0	0	0	1	1	1	0	0	0	0	1	3	0	0	0	1	2	0	0	0	1	1
ALDH3A2__chr17	1	1	0	2	0	4	2	0	0	0	2	7.01	2	4	8.01	2	0	1	4	1	0	0	0	0	1	2	0	4	1	3	2	1	1	1	0	0	4	2	2	2	2	2	1	5	0	0	2	2	3
ALDH3B1__chr11	1	0	1	0	0	1	0	1	0	0	0	2	0	0	1	3	0	1	1	0	0	0	0	0	1	1	0	2	2	1	0	1	2	0	2	0	3	0	0	2	0	2	1	1	1	0	1	0	1
ALDH4A1__chr1	0	0	0	0	0	0	1	0	0	0	0	0	0	0	0	0	0	1	0	0	0	0	0	1	0	0	0	0	1	0	3	1	3	0	0	0	0	0	1	0	0	0	1	0	0	0	0	1	0
ALDH5A1__chr6	0	0	2	0	0	0	1	0	0	0	0	1	0	0	1	1	0	0	1	0	0	0	0	0	1	1	1	0	0	1	2	0	1	0	0	0	0	0	0	0	0	0	0	0	0	0	0	0	0
ALDH6A1__chr14	0	0	0	0	0	0	0	0	0	0	0	0	0	0	0	1	0	0	0	0	0	0	0	0	0	0	0	0	0	0	0	1	0	0	0	0	0	0	1	2	0	0	0	0	0	0	0	0	0
ALDH7A1__chr5	0	2	4	1	0	6	5	2	2	0	4	7.01	4	4	3	3	0	7.01	6	1	2	1	4	1	5	3	2	4	5	8.01	6	9.01	5	0	6	3	6	1	16.03	9.01	5	11.01	4	10.01	0	1	7.01	7.01	2
ALDH8A1__chr6	0	0	0	0	0	0	0	0	0	0	0	0	0	0	0	0	0	0	1	0	0	0	0	0	0	0	0	0	0	0	0	0	0	0	0	0	0	0	0	1	0	0	0	0	0	0	0	0	0
ALDH9A1__chr1	3	3	2	0	1	4	9.01	1	7.01	0	2	8.01	2	5	9.01	3	0	5	3	5	4	1	5	2	5	7.01	10.01	3	4	7.01	12.02	7.01	6	1	8.01	8.01	4	4	13.02	8.01	4	6	5	13.02	0	0	2	1	6
ALDOA__chr16	2	10.01	8.01	2	1	18.04	10.01	5	10.01	0	7.01	19.04	5	11.01	15.03	10.01	0	14.02	15.03	5	5	3	10.01	2	15.03	11.01	16.03	5	9.01	26.08	24.07	28.09	21.05	5	25.07	5	16.03	16.03	29.1	17.03	5	17.03	15.03	19.04	0	0	7.01	8.01	15.03
ALDOC__chr17	0	0	0	0	0	0	0	0	0	0	0	0	0	0	0	0	0	0	0	0	0	0	0	0	0	0	0	0	0	0	1	0	0	0	0	1	0	0	0	1	0	0	0	1	0	0	0	0	0
ALG10B__chr12	2	1	3	0	0	0	1	1	1	0	6	1	0	1	1	1	0	1	0	0	1	0	1	0	3	0	1	1	0	5	3	1	0	1	9.01	2	1	0	4	1	2	0	2	3	0	0	1	0	1
ALG10__chr12	0	0	0	0	0	0	0	0	0	0	0	0	0	0	0	0	0	0	0	0	0	0	0	0	0	0	0	0	0	1	0	0	0	1	0	0	0	0	0	0	0	0	0	0	0	0	1	0	0
ALG11__chr13	0	0	0	0	0	0	0	0	0	0	0	0	0	0	0	0	0	0	0	0	0	0	0	0	0	0	0	0	0	0	1	1	1	0	0	0	0	0	0	1	0	0	0	1	0	0	1	0	0
ALG12__chr22	0	0	1	0	0	1	1	1	3	0	0	2	0	2	4	0	0	4	1	0	0	0	0	0	2	1	3	0	0	1	0	1	2	0	1	2	2	0	4	1	1	1	4	5	0	0	0	0	0
ALG13__chrX	0	2	0	1	0	0	3	0	3	0	0	4	0	0	3	3	0	0	0	2	0	0	0	0	0	3	5	1	0	0	0	3	2	0	0	1	1	1	3	1	1	1	0	1	0	0	0	1	1
ALG14__chr1	1	1	0	0	0	1	1	0	2	0	0	1	1	0	1	1	0	2	0	4	0	0	0	0	1	1	0	1	1	2	2	0	2	1	0	2	2	1	3	1	0	0	3	2	1	0	2	0	1
ALG1L9P__chr11	0	0	0	0	0	0	0	0	0	0	0	0	0	0	0	0	0	0	0	0	0	0	0	0	0	0	0	0	0	0	0	0	0	0	0	0	0	0	0	0	0	0	0	0	0	0	0	0	0
ALG1__chr16	0	0	0	1	0	0	0	0	0	0	0	0	0	0	0	0	0	0	0	0	0	0	0	0	1	0	0	0	0	0	0	0	0	0	0	0	0	0	0	0	0	0	0	0	0	0	0	0	0
ALG2__chr9	2	0	0	1	0	0	1	0	4	0	5	8.01	3	0	4	1	1	0	2	0	0	1	1	0	3	2	0	2	1	2	3	3	3	2	1	2	4	1	3	1	1	3	5	5	0	0	2	0	0
ALG3__chr3	3	6	4	1	0	6	5	2	4	0	3	14.02	4	3	9.01	6	0	10.01	8.01	1	1	1	2	1	5	4	4	3	5	4	7.01	16.03	10.01	1	4	3	3	5	5	8.01	1	12.02	3	10.01	0	0	0	4	1
ALG5__chr13	1	0	6	4	0	3	1	1	0	0	0	0	1	9.01	3	6	0	3	0	1	0	0	0	0	2	2	5	3	1	6	2	3	4	2	4	6	5	3	6	4	4	5	3	3	0	0	7.01	2	2
ALG6__chr1	0	1	0	2	0	3	0	3	0	0	1	1	1	0	0	2	0	0	0	1	0	0	0	0	2	1	0	0	0	2	0	1	1	0	0	3	3	0	2	0	2	0	0	3	1	0	0	0	1
ALG8__chr11	5	2	6	1	0	2	2	0	3	0	2	8.01	4	4	10.01	8.01	0	4	3	1	1	0	5	2	3	2	1	0	3	2	2	10.01	4	2	7.01	3	6	5	6	10.01	6	4	5	8.01	0	0	3	4	3
ALG9__chr11	2	0	1	1	0	0	0	0	2	0	0	0	0	0	1	1	0	3	1	0	0	0	2	2	1	2	0	1	0	4	2	1	0	0	1	1	0	1	4	0	0	1	2	2	0	0	3	0	1
ALKBH1__chr14	0	0	0	0	0	0	2	1	1	0	1	0	0	2	1	2	0	0	0	0	0	0	0	0	2	0	1	1	0	0	2	1	0	0	1	0	0	1	0	0	1	2	0	1	0	0	2	0	2
ALKBH2__chr12	1	0	0	0	0	0	0	0	0	0	0	1	0	1	1	2	0	0	1	0	0	0	0	0	3	0	0	0	0	1	0	0	1	0	1	0	2	0	1	0	0	0	1	1	0	0	0	0	0
ALKBH3__chr11	0	0	0	0	0	0	0	1	0	0	0	1	0	1	0	0	0	1	1	2	0	0	1	0	0	1	2	1	0	2	3	0	1	0	0	0	3	1	1	0	0	0	3	0	0	0	1	0	0
ALKBH4__chr7	0	0	0	0	0	0	1	0	0	0	0	0	0	1	1	0	0	0	0	0	0	0	0	0	0	0	0	0	0	1	1	1	0	0	0	0	0	0	1	1	0	1	1	1	0	0	0	0	0
ALKBH5__chr17	2	2	3	4	0	8.01	2	3	5	0	2	5	4	5	5	6	0	5	0	3	2	0	5	1	2	4	6	3	0	15.03	9.01	7.01	7.01	4	3	1	2	9.01	9.01	5	3	3	6	9.01	0	0	8.01	3	6
ALKBH6__chr19	0	1	2	0	0	1	1	0	1	0	0	2	1	0	1	2	0	1	2	1	0	0	0	1	2	0	0	0	0	1	2	4	1	0	3	0	1	1	1	0	1	1	0	0	0	0	0	0	0
ALKBH7__chr19	0	1	0	0	0	1	0	0	1	0	0	0	0	0	1	0	0	0	0	0	0	0	0	0	0	0	1	0	0	1	0	1	1	0	1	0	0	0	0	2	0	1	0	1	0	0	0	0	0
ALKBH8__chr11	0	0	0	0	0	0	0	0	0	0	0	1	0	0	0	0	0	0	1	0	0	0	0	1	0	0	1	2	0	2	0	0	0	0	1	0	0	1	1	0	0	0	0	0	0	0	0	0	0
ALMS1P__chr2	0	0	0	0	0	0	0	0	0	0	0	0	0	0	0	0	0	0	0	0	0	0	0	0	0	0	0	0	0	0	0	0	0	0	0	0	0	0	0	0	0	0	0	0	0	0	0	0	0
ALMS1__chr2	0	0	0	0	0	1	1	0	1	0	2	3	0	2	0	1	0	3	1	0	0	0	0	0	1	1	1	0	0	0	0	0	0	0	0	1	0	0	0	0	1	1	1	1	0	0	0	0	1
ALOX12P2__chr17	0	0	0	0	0	0	0	0	0	0	0	0	0	0	0	0	0	0	0	0	0	1	0	0	0	0	0	0	0	0	0	0	0	0	0	0	0	0	0	1	0	0	0	0	0	0	0	0	0
ALOX5AP__chr13	0	0	1	0	0	0	0	0	0	0	0	0	0	0	0	0	0	0	0	0	0	0	0	0	0	0	0	0	0	0	0	0	0	0	0	0	0	0	0	0	0	0	0	0	0	0	0	0	0
ALOXE3__chr17	0	0	0	0	0	0	0	0	0	0	0	0	0	0	0	0	0	0	0	0	0	0	0	0	0	0	0	0	0	0	0	0	0	0	0	0	0	0	0	0	0	0	0	0	0	0	0	0	0
ALPK1__chr4	0	0	0	0	0	0	1	0	0	0	1	1	0	0	2	1	0	0	0	0	0	0	0	0	0	0	0	0	0	0	2	2	0	1	1	0	3	0	2	2	0	0	1	1	0	0	0	0	0
ALPK2__chr18	0	0	0	0	0	0	0	0	0	0	0	0	0	0	0	0	0	0	0	0	0	0	0	0	0	0	0	0	0	0	0	0	0	0	0	0	0	0	0	0	0	0	0	0	0	0	0	0	0
ALPK3__chr15	0	0	0	0	0	0	0	0	0	0	0	0	0	0	0	0	0	0	0	0	0	0	0	0	0	0	0	0	0	0	0	0	0	0	0	0	0	0	0	0	0	0	0	0	0	0	0	0	0
ALPL__chr1	0	0	0	0	0	0	0	0	0	0	0	0	0	0	0	0	0	0	0	0	0	0	0	0	0	0	0	0	0	0	0	0	0	0	0	0	0	0	0	0	0	0	0	0	0	0	0	0	0
ALPP__chr2	0	0	0	0	0	0	0	0	0	0	0	0	0	0	0	0	0	0	0	0	0	0	0	0	0	0	0	0	0	0	0	0	0	0	0	0	0	0	0	0	0	0	0	0	0	0	0	0	0
ALS2CL__chr3	0	0	1	0	0	0	0	0	0	0	0	1	0	0	0	0	0	0	0	0	0	0	0	0	0	0	0	0	0	0	0	1	1	0	0	0	0	0	0	0	0	0	0	0	0	0	0	0	0
ALS2CR8__chr2	0	0	0	0	0	0	0	0	0	0	0	0	0	0	0	0	0	1	0	0	0	0	0	0	0	0	0	0	0	0	0	0	0	0	0	0	0	1	0	0	0	0	0	1	0	0	0	0	1
ALS2__chr2	1	4	1	0	0	3	1	0	2	0	2	0	0	0	3	1	0	0	0	1	0	0	2	0	0	2	1	5	0	4	7.01	5	2	3	1	3	4	1	6	2	3	6	0	4	0	1	2	1	1
ALX1__chr12	0	0	0	0	0	0	0	0	0	0	0	2	0	1	0	0	0	1	1	0	0	0	0	0	0	0	0	2	1	1	2	1	0	0	2	0	0	1	0	0	0	0	2	3	0	0	1	0	0
ALX3__chr1	0	0	0	0	0	0	0	0	0	0	0	0	0	0	0	0	0	0	0	0	0	0	0	0	0	0	0	0	0	0	0	0	0	0	0	0	0	0	0	0	0	0	0	0	0	0	0	0	0
ALYREF__chr17	1	2	3	1	0	5	6	2	7.01	0	7.01	8.01	8.01	4	6	6	0	4	7.01	5	0	2	3	2	8.01	4	4	4	2	13.02	2	6	14.02	3	5	7.01	5	2	5	11.01	4	5	7.01	8.01	0	0	8.01	8.01	4
AMBP__chr9	0	0	0	0	0	0	0	0	0	0	0	0	0	0	0	0	0	0	0	0	0	0	0	0	0	0	0	0	0	0	0	0	0	0	0	0	0	0	0	0	0	0	0	0	0	0	0	0	0
AMBRA1__chr11	1	1	0	1	0	1	0	0	4	0	0	0	0	2	0	1	0	1	1	0	0	0	2	0	0	1	0	0	1	0	0	1	2	0	0	0	1	0	2	0	1	0	1	1	0	0	0	1	0
AMD1__chr6	1	4	5	3	0	4	6	3	8.01	0	4	14.02	8.01	1	6	6	0	2	2	2	2	0	5	9.01	6	1	8.01	9.01	6	19.04	9.01	6	15.03	1	6	4	10.01	2	11.01	3	2	10.01	2	8.01	0	0	4	6	7.01
AMDHD2__chr16	0	0	0	0	0	1	0	0	0	0	0	0	0	0	0	0	0	0	0	0	0	0	0	0	0	0	0	0	0	0	0	1	2	0	0	0	0	0	2	0	0	1	0	0	0	0	0	0	0
AMER1__chrX	0	0	0	0	0	0	0	0	0	0	0	0	0	0	0	0	0	0	0	0	0	0	0	0	0	0	0	0	0	1	0	0	0	0	0	0	0	0	0	0	0	0	0	0	0	0	0	0	0
AMER3__chr2	0	0	0	0	0	0	0	0	0	0	0	0	0	0	0	0	0	0	0	0	0	0	0	0	0	0	0	0	0	0	0	0	0	0	1	0	0	0	0	0	0	0	0	0	0	0	0	0	0
AMFR__chr16	0	3	1	1	0	0	0	2	1	0	2	4	0	1	3	2	0	0	0	0	0	0	2	0	3	1	5	0	0	6	2	5	0	1	1	2	1	0	7.01	1	3	3	2	1	0	0	2	0	3
AMH__chr19	0	0	1	0	0	0	0	2	0	0	0	0	0	0	0	3	0	0	0	0	0	0	0	0	0	0	0	0	0	0	0	0	1	0	0	0	0	0	0	0	0	0	0	0	0	0	0	0	0
AMIGO2__chr12	12.02	9.01	19.04	11.01	0	28.09	20.05	12.02	25.07	0	13.02	32.12	13.02	31.11	32.12	14.02	0	15.03	11.01	10.01	5	3	18.04	9.01	28.09	17.03	47.27	21.05	15.03	77.72	51.31	31.11	19.04	14.02	60.44	29.1	43.22	21.05	84.86	47.27	37.16	42.21	26.08	35.15	1	0	24.07	19.04	25.07
AMIGO3__chr3	0	0	0	0	0	1	1	0	0	0	0	0	0	0	1	0	0	1	0	1	0	0	0	0	0	1	1	0	0	0	1	0	0	0	1	0	0	0	0	0	0	1	0	0	0	0	0	0	0
AMMECR1L__chr2	1	1	1	4	0	5	1	5	2	0	2	2	2	2	2	3	0	1	2	0	1	0	0	1	3	2	4	3	2	0	3	7.01	9.01	2	1	2	2	0	6	4	2	4	5	2	0	0	1	0	0
AMMECR1__chrX	1	2	0	3	0	2	0	0	0	0	0	5	2	2	4	2	0	4	1	2	0	0	2	0	2	1	0	5	1	5	3	7.01	5	1	6	2	2	1	7.01	2	2	1	1	3	0	0	0	1	1
AMN1__chr12	0	0	0	0	0	1	3	0	0	0	2	0	0	0	1	0	0	1	1	2	0	0	0	0	0	1	1	1	0	1	0	3	0	1	1	0	2	0	1	2	1	1	0	1	0	0	0	2	1
AMOTL1__chr11	1	0	2	0	0	4	6	2	4	0	2	1	4	7.01	6	4	0	5	8.01	1	0	0	2	0	4	3	2	2	2	11.01	3	5	6	0	2	2	2	4	6	8.01	2	2	1	4	0	0	1	1	2
AMOTL2__chr3	2	3	13.02	4	0	5	4	5	2	0	5	14.02	2	10.01	10.01	4	0	7.01	4	2	0	2	0	5	17.03	7.01	18.04	18.04	5	18.04	21.05	31.11	20.05	1	8.01	6	16.03	5	8.01	15.03	13.02	15.03	17.03	13.02	0	1	10.01	9.01	8.01
AMOT__chrX	0	0	0	0	0	0	0	0	0	0	0	1	0	0	0	1	0	0	1	0	0	0	0	0	0	0	0	0	0	1	3	0	2	0	0	1	0	0	0	2	2	1	0	0	0	0	0	1	0
AMPD2__chr1	0	1	2	0	0	2	0	0	1	0	0	1	1	1	2	3	0	0	1	1	0	0	0	0	1	2	6	2	2	1	3	1	3	0	0	1	4	2	5	6	1	3	0	0	0	0	0	1	2
AMPD3__chr11	0	0	0	0	0	0	0	1	0	0	0	1	0	0	3	0	0	0	0	0	0	0	0	0	0	0	1	0	0	0	1	0	0	0	2	0	0	0	0	0	0	0	0	0	0	0	0	0	0
AMPH__chr7	0	0	0	0	0	0	0	0	0	0	0	0	0	0	0	0	0	0	0	0	0	0	0	0	0	0	0	0	0	0	0	0	0	0	0	0	0	0	0	0	0	0	0	0	0	0	0	0	0
AMTN__chr4	1	0	2	7.01	0	1	0	0	1	0	2	7.01	0	5	1	0	0	0	0	1	0	0	7.01	0	3	1	1	3	4	4	3	0	0	0	0	4	1	1	3	3	3	4	0	0	0	0	3	1	1
AMT__chr3	0	0	0	0	0	0	0	0	0	0	1	0	0	0	0	0	0	0	0	0	0	0	0	0	0	0	0	0	0	0	0	0	0	0	0	0	0	0	1	0	0	0	0	0	0	0	0	0	0
AMY2B__chr1	0	0	0	0	0	0	0	0	0	0	0	0	0	0	0	0	0	0	0	0	0	0	0	0	0	0	0	0	0	0	0	0	0	0	0	0	1	0	0	0	0	0	0	0	0	0	0	0	0
AMZ1__chr7	0	0	0	0	0	0	0	0	0	0	0	0	0	0	0	1	0	0	0	0	0	0	0	0	0	0	0	0	0	0	0	0	0	0	0	0	0	0	0	0	0	0	0	0	0	0	0	0	0
AMZ2P1__chr17	0	0	0	0	0	0	0	0	0	0	0	1	0	0	2	0	0	0	0	0	0	0	0	0	0	0	0	0	0	0	3	1	0	0	1	0	1	0	1	1	0	0	1	0	0	0	0	0	1
AMZ2__chr17	1	1	1	0	0	1	2	0	3	0	1	2	0	0	3	4	0	0	1	1	1	0	1	0	1	1	1	1	2	3	2	3	3	1	3	2	2	1	3	0	6	2	1	3	0	0	0	0	1
ANAPC10__chr4	1	0	0	1	0	0	1	0	1	0	1	2	0	1	1	1	0	0	1	1	0	0	0	0	2	0	3	1	1	3	2	0	1	1	2	1	1	0	2	0	3	0	0	2	0	0	2	1	2
ANAPC11__chr17	0	4	3	0	0	4	7.01	1	2	0	1	7.01	4	3	1	2	0	2	2	4	2	0	1	0	3	3	7.01	2	7.01	3	3	2	3	4	4	4	3	3	2	4	7.01	3	5	8.01	0	0	1	3	3
ANAPC13__chr3	0	6	3	0	0	2	8.01	3	5	0	3	21.05	0	8.01	5	2	0	1	4	1	3	1	5	1	4	3	9.01	8.01	3	17.03	5	11.01	6	4	6	5	10.01	8.01	14.02	10.01	7.01	9.01	3	7.01	0	0	5	4	7.01
ANAPC15__chr11	0	1	0	0	0	0	1	0	0	0	0	0	0	1	0	0	0	0	0	0	0	0	0	0	0	0	1	0	0	0	1	1	0	0	1	0	0	0	1	0	0	0	0	0	0	0	0	0	0
ANAPC16__chr10	0	3	0	3	0	5	3	2	2	0	0	11.01	5	3	6	1	0	3	5	0	2	1	3	3	4	2	3	3	2	6	5	9.01	4	3	3	7.01	4	2	5	5	1	4	3	4	0	0	4	2	6
ANAPC1__chr2	0	0	1	1	0	0	1	1	1	0	2	4	3	3	4	2	0	2	1	0	0	0	0	0	4	0	7.01	3	1	5	5	1	3	0	2	4	2	1	3	5	0	2	3	6	0	0	0	0	3
ANAPC2__chr9	0	0	1	0	0	0	0	1	0	0	0	0	0	0	1	0	0	0	0	0	0	0	0	0	0	0	1	0	0	0	1	0	1	0	1	0	0	0	0	0	0	0	0	1	0	0	0	0	0
ANAPC4__chr4	0	0	1	0	0	0	0	0	0	0	0	0	1	4	1	1	0	0	0	0	0	0	0	0	1	1	2	2	1	2	0	0	0	0	3	0	1	0	3	1	0	0	0	2	0	0	0	0	2
ANAPC5__chr12	3	3	17.03	3	0	10.01	15.03	8.01	14.02	0	3	20.05	4	11.01	16.03	10.01	0	16.03	11.01	2	0	0	6	3	10.01	3	11.01	12.02	9.01	21.05	26.08	15.03	18.04	1	9.01	10.01	10.01	7.01	24.07	12.02	12.02	12.02	10.01	15.03	0	0	7.01	6	13.02
ANAPC7__chr12	2	5	1	3	0	5	6	1	4	0	4	7.01	2	5	9.01	4	0	2	4	5	0	0	4	1	3	1	8.01	3	2	7.01	6	5	6	1	9.01	4	6	5	8.01	7.01	0	11.01	9.01	17.03	0	0	2	3	6
ANGEL1__chr14	0	0	1	0	0	0	2	1	0	0	0	0	0	0	1	0	0	0	0	0	0	0	0	0	0	0	0	0	0	1	0	0	0	0	0	0	0	0	0	0	0	0	0	3	0	0	1	0	0
ANGEL2__chr1	0	1	1	1	0	0	2	0	2	0	0	0	2	1	3	3	0	3	2	2	0	0	1	0	4	2	0	2	1	4	7.01	3	1	1	5	2	4	0	4	1	1	1	0	2	0	0	0	0	2
ANGPT1__chr8	0	0	0	0	0	0	0	0	0	0	0	0	0	0	0	0	0	0	0	0	0	0	0	0	0	0	1	0	0	0	1	0	1	0	1	0	1	0	0	0	0	2	0	1	0	0	0	0	1
ANGPT2__chr8	0	0	0	0	0	0	0	0	0	0	0	0	0	0	0	0	0	0	0	0	0	0	0	0	0	0	0	0	0	0	0	0	0	0	0	0	0	0	0	0	0	0	0	0	0	0	0	0	0
ANGPTL2__chr9	0	0	0	0	0	0	0	1	0	0	0	0	0	0	1	1	0	0	0	0	0	0	1	0	0	1	0	0	0	0	0	2	0	0	3	0	0	0	0	0	0	0	0	0	0	0	0	3	2
ANGPTL3__chr1	0	0	0	0	0	0	0	0	0	0	0	0	0	0	0	0	0	0	0	0	0	0	0	0	0	0	0	0	0	0	0	0	0	0	1	0	0	0	0	0	0	0	0	0	0	0	0	0	0
ANGPTL4__chr19	0	0	0	0	0	0	0	0	0	0	0	0	0	1	0	0	0	0	0	0	0	0	0	0	0	0	0	0	0	0	2	0	0	0	0	0	0	0	0	0	0	0	0	0	0	0	0	0	0
ANGPTL6__chr19	0	0	0	0	0	0	0	0	0	0	0	0	0	0	0	0	0	0	0	0	0	0	0	0	0	0	0	0	0	0	0	0	0	0	0	0	0	0	0	0	0	0	0	0	0	0	0	0	0
ANG__chr14	0	0	1	0	0	0	0	0	0	0	0	0	0	0	0	0	0	0	0	0	0	0	0	0	0	0	0	0	0	0	0	0	1	0	0	0	0	1	0	0	0	0	0	0	0	0	0	0	0
ANK1__chr8	0	0	0	0	0	0	0	0	0	0	0	0	0	0	0	0	0	0	0	0	0	0	0	0	0	0	0	0	0	0	1	0	0	0	0	0	0	0	0	0	0	0	0	0	0	0	0	0	0
ANK2__chr4	0	0	0	0	0	0	0	0	0	0	0	0	0	0	1	0	0	0	0	0	0	0	0	0	0	0	0	0	0	0	3	1	0	0	1	0	0	0	0	1	0	0	0	2	0	0	0	0	0
ANK3__chr10	0	0	1	0	0	0	0	0	0	0	1	0	0	0	2	0	0	0	0	2	1	0	0	0	0	0	0	1	0	0	0	2	0	0	0	0	2	0	1	1	0	0	0	0	0	0	0	0	0
ANKAR__chr2	0	0	0	0	0	0	0	0	0	0	0	0	0	0	0	0	0	0	0	0	0	0	1	0	0	0	0	0	0	0	0	0	0	0	1	0	0	0	0	0	0	0	1	0	0	0	1	0	0
ANKDD1A__chr15	0	0	0	0	0	0	0	0	0	0	0	0	0	0	1	0	0	0	0	0	0	0	0	0	0	0	0	0	0	0	0	0	0	0	0	0	0	0	0	0	0	0	0	0	0	0	0	0	0
ANKEF1__chr20	0	0	0	0	0	0	0	0	0	0	2	1	0	1	0	0	0	0	0	0	0	0	0	0	0	0	0	0	1	1	0	0	0	0	0	0	1	0	1	0	0	0	0	0	0	0	0	0	0
ANKFN1__chr17	0	0	0	0	0	0	0	0	0	0	0	0	0	0	0	0	0	0	0	0	0	0	0	0	0	0	0	1	0	0	0	0	0	0	0	0	0	0	0	0	0	0	0	0	0	0	0	0	0
ANKFY1__chr17	1	1	4	1	0	2	4	1	0	0	0	4	1	0	4	0	0	3	4	0	0	0	1	1	4	1	0	2	3	3	5	2	4	0	2	1	2	3	6	1	0	0	0	2	0	0	0	2	3
ANKHD1-EIF4EBP3__chr5	0	0	0	0	0	0	0	0	0	0	0	0	0	0	1	0	0	0	0	0	0	0	0	0	1	0	1	0	0	0	1	0	1	0	0	0	0	0	0	0	0	0	0	0	0	0	0	0	0
ANKHD1__chr5	0	0	4	1	0	5	0	0	5	0	1	2	0	3	5	2	0	1	0	0	0	0	1	2	1	2	1	5	1	4	5	3	2	0	1	0	2	1	4	4	1	3	2	5	0	0	1	0	5
ANKH__chr5	0	0	0	1	0	0	1	1	0	0	0	1	0	0	0	0	0	1	2	0	0	0	0	0	0	0	0	1	0	3	0	0	0	0	2	0	1	0	0	0	0	1	1	1	0	0	2	0	0
ANKIB1__chr7	1	1	3	1	0	3	1	0	4	0	1	5	3	2	7.01	7.01	0	3	3	0	1	0	1	2	1	2	4	2	1	4	4	3	10.01	1	11.01	2	2	6	7.01	9.01	4	6	4	5	0	1	4	3	2
ANKLE1__chr19	1	0	0	0	0	0	0	0	0	0	0	0	0	1	0	0	0	0	0	0	0	0	0	0	0	1	0	0	0	1	0	0	0	0	0	0	1	0	0	0	1	0	0	0	0	0	0	0	0
ANKLE2__chr12	8.01	4	7.01	4	0	4	10.01	6	12.02	0	8.01	7.01	6	4	7.01	5	0	8.01	4	1	2	0	5	2	7.01	7.01	9.01	9.01	4	9.01	9.01	9.01	9.01	2	8.01	9.01	16.03	5	16.03	10.01	8.01	12.02	4	9.01	1	0	7.01	8.01	3
ANKMY1__chr2	0	0	0	0	0	0	0	0	0	0	0	1	0	0	0	0	0	0	0	0	0	0	0	0	0	0	0	0	0	0	0	0	0	0	0	0	0	0	0	0	0	0	0	1	0	0	0	0	0
ANKMY2__chr7	0	0	0	0	0	0	1	0	1	0	0	1	0	0	0	2	0	0	0	0	1	0	1	0	0	0	0	0	0	2	3	0	3	2	3	0	0	0	4	2	0	0	1	0	0	0	1	0	0
ANKRA2__chr5	0	0	0	1	0	0	1	0	0	0	0	1	0	0	0	0	0	0	2	0	0	0	0	0	0	0	0	0	0	0	2	0	0	0	0	2	0	0	0	0	0	1	0	0	0	0	0	0	0
ANKRD10__chr13	0	1	0	1	0	3	0	0	1	0	1	2	1	2	2	2	0	1	1	1	0	0	2	0	0	1	1	2	1	4	0	0	0	0	1	1	1	0	0	0	1	0	1	0	0	0	0	0	2
ANKRD11__chr16	4	8.01	7.01	3	0	6	8.01	5	26.08	1	9.01	10.01	7.01	4	28.09	8.01	0	8.01	7.01	4	2	0	6	2	9.01	2	5	5	5	8.01	16.03	17.03	7.01	3	22.06	8.01	14.02	7.01	19.04	17.03	7.01	29.1	8.01	17.03	0	1	2	4	7.01
ANKRD12__chr18	1	4	5	2	0	4	1	1	2	0	1	1	2	2	5	4	2	4	3	1	0	0	0	1	3	3	1	2	1	1	11.01	10.01	3	0	6	11.01	4	6	0	7.01	1	9.01	5	7.01	0	0	0	1	0
ANKRD13A__chr12	3	4	8.01	4	0	8.01	7.01	3	8.01	0	2	9.01	1	7.01	14.02	4	0	6	0	3	2	0	3	1	1	2	7.01	8.01	7.01	13.02	9.01	15.03	15.03	2	6	6	6	3	14.02	17.03	7.01	10.01	8.01	4	0	1	11.01	6	7.01
ANKRD13B__chr17	0	1	2	0	0	1	0	1	0	0	0	0	0	1	1	0	0	0	0	1	0	0	0	1	0	1	1	0	0	0	1	2	4	0	0	1	0	0	0	0	0	0	3	0	0	0	0	0	0
ANKRD13C__chr1	2	0	0	0	0	0	0	0	1	0	0	1	0	0	2	1	0	2	0	1	0	0	0	1	3	1	1	1	0	0	2	2	2	0	6	1	1	3	2	0	2	0	1	1	0	0	2	1	3
ANKRD13D__chr11	0	1	0	0	0	1	1	1	0	0	0	1	0	0	1	0	0	3	1	0	0	0	0	0	0	1	1	1	0	0	1	1	2	0	1	1	0	1	2	1	0	3	2	4	0	0	1	1	0
ANKRD16__chr10	0	0	1	0	0	0	0	0	0	0	0	1	0	0	1	0	0	0	0	0	0	0	1	0	0	0	1	0	0	0	1	1	1	0	1	0	1	0	0	0	1	1	1	0	0	0	0	0	0
ANKRD17__chr4	3	1	2	1	0	5	3	1	9.01	0	1	11.01	2	3	4	2	0	2	3	1	0	0	1	0	3	2	1	6	2	2	9.01	5	3	1	6	1	4	1	5	4	4	5	0	5	0	0	1	1	4
ANKRD18A__chr9	0	0	0	0	0	0	0	0	0	0	0	0	1	0	0	0	0	0	0	0	0	0	0	0	0	1	0	1	0	0	1	2	0	1	0	0	0	0	1	1	0	0	0	2	0	0	0	0	0
ANKRD18B__chr9	0	0	0	0	0	0	1	0	0	0	0	0	0	0	0	1	0	0	0	0	0	0	0	0	0	0	1	0	0	0	0	0	0	0	0	0	0	0	0	1	0	0	0	0	0	0	0	0	0
ANKRD18DP__chr3	0	0	0	0	0	0	0	0	0	0	0	0	0	0	1	0	0	0	0	0	0	0	0	0	1	0	0	0	0	0	0	0	0	0	0	0	0	1	0	0	0	0	1	0	0	0	0	0	0
ANKRD19P__chr9	0	0	0	0	0	0	0	0	0	0	0	0	0	0	0	0	0	0	0	0	0	0	0	0	0	0	0	0	0	0	0	0	0	0	0	0	0	0	0	0	0	0	0	0	0	0	0	0	0
ANKRD1__chr10	2	0	3	2	0	1	5	0	9.01	0	3	5	1	5	4	1	0	2	0	0	1	0	0	1	3	1	0	15.03	1	4	1	11.01	11.01	1	0	6	5	0	3	2	0	3	6	0	0	0	5	7.01	4
ANKRD20A12P__chr1	0	0	0	0	0	0	0	0	0	0	0	0	0	0	0	0	0	0	1	0	0	0	0	0	0	1	0	0	0	0	0	0	0	0	0	0	0	1	0	0	0	0	0	0	0	0	0	0	0
ANKRD20A5P__chr18	0	0	0	0	0	0	0	0	0	0	0	0	0	0	0	0	0	0	0	0	0	0	0	0	0	0	0	0	0	0	0	0	0	0	0	0	0	0	0	0	0	0	0	0	0	0	0	0	0
ANKRD20A8P__chr2	0	0	0	0	0	0	0	0	0	0	0	0	0	0	0	0	0	0	0	0	0	0	0	0	0	0	0	0	0	0	0	0	0	1	0	0	0	0	1	1	0	0	0	0	0	0	0	0	0
ANKRD20A9P__chr13	0	2	0	1	0	2	2	3	0	0	0	5	2	3	3	4	0	3	4	1	0	0	2	1	0	1	2	2	2	4	7.01	1	1	0	0	2	5	0	6	6	0	1	1	4	0	0	3	3	0
ANKRD23__chr2	0	0	0	0	0	0	0	0	0	0	0	0	0	0	0	0	0	0	0	0	0	0	0	0	0	0	1	0	0	0	0	0	0	0	0	0	0	0	0	0	0	0	0	0	0	0	0	0	0
ANKRD24__chr19	0	0	0	0	0	0	0	0	0	0	0	0	0	0	0	0	0	0	0	0	0	0	0	0	0	0	0	0	0	0	0	0	0	0	0	0	0	0	0	0	0	0	0	0	0	0	0	0	0
ANKRD26__chr10	0	5	1	0	0	2	3	0	4	0	0	5	3	9.01	4	0	0	3	2	0	1	0	0	0	9.01	2	1	5	2	1	10.01	2	3	0	5	2	1	1	1	5	1	1	2	8.01	0	1	2	0	2
ANKRD27__chr19	0	0	1	0	0	2	1	1	2	0	1	4	0	0	4	3	0	1	1	0	0	0	0	1	0	2	0	0	2	3	3	3	1	0	0	4	2	2	1	2	1	0	0	2	0	0	1	1	1
ANKRD28__chr3	1	1	5	1	0	4	0	3	1	0	2	7.01	1	2	1	3	0	0	3	0	0	0	3	0	1	2	4	3	1	2	6	5	5	0	8.01	5	2	2	11.01	4	4	3	4	7.01	0	0	1	1	1
ANKRD2__chr10	0	0	0	0	0	0	0	0	0	0	0	0	0	0	0	0	0	0	0	0	0	0	0	0	0	0	0	0	0	0	0	0	0	0	0	0	0	0	0	0	0	0	0	0	0	0	0	0	0
ANKRD30BL__chr2	0	0	0	0	0	0	0	0	0	0	0	0	0	0	1	0	0	0	0	0	0	0	0	0	2	1	0	0	0	0	0	0	0	0	1	0	0	0	0	0	0	1	0	0	0	0	0	1	0
ANKRD30BP2__chr21	0	0	1	0	0	0	0	0	1	0	0	0	0	0	0	0	0	0	0	0	0	0	0	0	0	0	0	0	0	0	1	0	0	3	0	0	0	0	1	0	0	0	0	0	0	0	0	0	2
ANKRD31__chr5	0	0	0	0	0	0	0	0	0	0	0	0	0	0	0	0	0	0	0	0	0	0	0	0	0	0	0	0	0	1	0	0	0	0	0	0	0	0	0	0	0	0	0	0	0	0	0	0	0
ANKRD32__chr5	0	0	3	0	0	0	0	0	1	0	0	2	1	0	3	1	0	0	0	0	0	0	2	1	1	0	1	0	1	1	0	0	0	0	1	0	1	0	1	1	0	0	1	3	0	0	0	2	0
ANKRD33B__chr5	0	0	0	0	0	0	0	0	0	0	1	0	0	0	0	0	0	0	1	0	0	0	0	0	1	0	0	1	0	0	0	0	0	0	0	0	0	0	0	0	0	0	0	1	0	0	0	0	0
ANKRD34A__chr1	1	0	0	0	0	0	0	0	0	0	0	3	0	0	2	0	0	0	0	0	0	0	0	0	1	0	1	0	2	1	0	1	1	0	2	1	1	2	0	2	0	1	0	0	0	0	0	0	0
ANKRD34C__chr15	0	0	0	0	0	0	0	0	0	0	0	0	0	0	0	0	0	0	0	0	0	0	0	0	0	0	0	0	0	0	0	0	0	0	0	0	0	0	0	0	0	0	0	0	0	0	0	0	0
ANKRD36BP1__chr1	0	0	0	0	0	0	0	0	0	0	0	0	0	0	0	1	0	0	0	0	0	0	1	0	1	0	0	0	0	0	1	1	2	0	0	0	0	0	1	0	0	0	1	0	0	0	0	0	0
ANKRD36BP2__chr2	0	0	0	0	0	0	0	0	0	0	0	0	0	0	0	0	0	0	0	0	0	0	0	0	0	0	0	1	0	0	0	0	0	0	0	0	0	0	0	0	0	0	0	0	0	0	0	0	0
ANKRD36B__chr2	1	1	0	0	0	1	0	0	4	0	0	1	1	0	1	1	0	1	0	0	0	0	0	0	0	1	0	0	0	1	1	1	0	0	0	0	0	0	0	0	0	0	0	2	0	0	0	0	0
ANKRD36__chr2	1	0	0	0	0	0	0	0	1	0	0	0	0	0	0	1	0	0	0	1	0	0	1	0	1	0	0	1	0	0	1	0	3	0	1	1	1	0	0	1	0	0	0	3	0	0	1	0	0
ANKRD37__chr4	0	0	0	0	0	0	0	0	0	0	0	0	0	0	0	0	0	0	0	0	0	0	0	0	0	0	0	0	0	1	0	0	0	0	0	0	0	0	0	0	0	0	0	0	0	0	1	0	0
ANKRD39__chr2	1	1	1	0	0	0	0	1	0	0	1	1	0	0	0	1	0	0	0	1	0	0	0	0	0	1	0	0	0	1	1	1	1	0	1	0	0	1	1	0	2	1	0	0	0	0	1	2	0
ANKRD40__chr17	0	0	2	1	0	2	2	0	1	0	1	5	1	3	4	2	0	3	0	2	0	0	2	1	5	1	3	2	1	14.02	2	7.01	7.01	3	4	2	3	1	5	4	4	6	4	4	0	0	4	1	5
ANKRD42__chr11	0	0	0	0	0	1	0	0	0	0	0	0	0	0	0	0	0	0	0	0	0	0	0	0	0	0	0	0	0	0	0	0	0	0	0	0	0	0	0	0	0	1	0	0	0	0	1	0	0
ANKRD44__chr2	0	2	0	0	0	2	1	0	1	0	0	0	0	0	1	0	0	0	0	0	0	0	0	1	0	0	0	0	0	0	4	1	1	0	1	0	1	1	1	2	0	1	0	1	0	0	1	1	1
ANKRD45__chr1	0	0	0	0	0	0	0	0	0	0	0	0	0	0	0	0	0	0	0	0	0	0	0	0	0	0	0	0	0	1	0	0	0	0	0	0	0	0	0	0	0	0	0	0	0	0	0	0	0
ANKRD46__chr8	0	0	0	0	0	0	0	0	2	0	0	1	0	0	1	0	0	1	0	0	0	0	0	0	0	0	0	2	0	0	0	0	0	0	0	0	0	0	1	0	0	0	0	0	0	0	0	0	0
ANKRD49__chr11	0	0	0	0	0	0	0	0	0	0	0	0	0	0	0	0	0	0	0	0	0	0	0	0	0	0	3	0	0	1	0	0	0	0	0	0	0	0	0	1	0	1	0	1	0	0	0	0	1
ANKRD50__chr4	2	1	1	0	0	1	2	2	2	0	1	5	0	3	0	1	0	3	3	0	0	0	4	1	1	0	2	1	0	4	3	5	1	1	6	2	1	2	2	4	3	1	1	2	0	0	1	1	2
ANKRD52__chr12	0	1	2	0	0	4	0	0	2	0	3	2	1	3	4	4	0	2	6	5	1	0	3	0	2	1	4	1	4	6	5	10.01	14.02	2	1	1	8.01	3	10.01	7.01	4	2	5	5	0	0	1	0	5
ANKRD54__chr22	0	1	0	0	0	1	1	0	0	0	0	0	0	0	0	0	0	1	0	0	0	0	0	0	1	0	0	0	0	3	1	1	1	0	3	0	1	2	2	0	1	1	0	1	0	0	0	1	0
ANKRD61__chr7	0	0	0	0	0	0	0	0	0	0	0	0	0	0	0	0	0	0	0	0	0	0	0	0	0	0	0	0	0	0	0	0	0	0	0	0	0	0	0	0	0	0	0	0	0	0	0	0	0
ANKRD62P1-PARP4P3__chr22	0	0	0	0	0	0	0	0	0	0	0	0	0	0	0	0	0	0	0	0	0	0	0	0	0	0	0	0	0	0	0	0	0	0	0	0	0	0	0	0	0	0	0	0	0	0	0	0	0
ANKRD65__chr1	0	0	0	0	0	0	0	0	0	0	0	0	0	0	0	0	0	0	0	0	0	0	0	0	0	0	0	0	0	0	0	0	0	0	0	0	0	0	0	0	1	0	0	0	0	0	0	0	0
ANKRD6__chr6	0	0	0	0	0	0	0	0	0	0	0	0	0	0	0	0	0	0	0	0	0	0	0	0	0	0	0	0	0	0	0	0	0	0	0	0	0	0	0	0	0	0	0	0	0	0	0	0	0
ANKRD9__chr14	1	2	0	0	0	2	2	2	0	0	0	4	1	5	1	0	0	2	2	0	1	0	2	0	5	0	1	1	0	6	6	3	7.01	0	2	1	1	2	5	4	1	4	3	4	0	0	0	2	1
ANKS1A__chr6	2	0	0	0	0	1	0	1	0	0	0	0	1	0	2	0	0	0	1	0	0	0	0	0	0	0	1	2	0	1	0	2	1	0	1	0	1	0	0	0	0	0	0	0	0	0	0	0	0
ANKS1B__chr12	0	0	0	0	0	0	0	0	0	0	0	0	0	0	0	0	0	0	0	0	0	0	0	0	0	0	0	0	0	0	0	1	0	0	0	0	0	0	0	0	0	0	0	0	0	0	0	0	0
ANKS3__chr16	0	0	0	1	0	0	0	0	0	0	0	1	0	0	0	0	0	0	0	0	0	0	0	0	0	0	1	0	0	0	2	0	1	0	0	0	1	0	0	0	0	0	1	0	0	0	0	0	0
ANKS4B__chr16	0	0	0	0	0	0	0	0	0	0	0	0	0	0	0	0	0	0	0	0	0	0	0	0	0	0	0	0	0	0	0	0	0	0	0	0	0	0	0	0	0	0	0	0	0	0	0	0	0
ANKS6__chr9	0	0	0	0	0	0	0	0	0	0	0	0	0	0	0	0	0	0	0	1	0	0	0	0	0	1	0	0	0	0	1	0	0	0	0	0	1	1	0	2	0	0	1	0	0	0	0	0	0
ANKUB1__chr3	0	0	0	0	0	0	0	0	0	0	0	0	0	0	0	0	0	0	0	0	0	0	0	0	0	0	0	0	0	0	0	0	0	0	0	0	0	0	0	0	0	0	0	0	0	0	0	0	0
ANKZF1__chr2	0	0	1	0	0	1	0	0	0	0	0	1	0	0	1	0	0	0	0	0	0	0	0	0	2	0	0	0	1	0	0	0	1	0	0	0	0	0	0	1	0	0	0	4	0	0	0	0	0
ANLN__chr7	6	17.03	22.06	12.02	0	15.03	7.01	6	22.06	0	4	14.02	3	6	2	16.03	0	11.01	6	7.01	6	2	12.02	6	5	0	2	6	3	23.06	33.13	34.14	21.05	5	26.08	15.03	13.02	21.05	35.15	21.05	14.02	15.03	17.03	31.11	0	1	17.03	15.03	7.01
ANO10__chr3	0	3	0	0	0	0	1	2	1	0	4	1	1	2	3	1	0	2	4	2	2	0	1	0	3	0	1	2	0	5	4	3	1	1	5	0	2	2	2	6	0	2	3	8.01	0	1	1	2	3
ANO1__chr11	0	0	0	0	0	0	0	0	0	0	0	0	0	0	0	0	0	0	0	0	0	0	0	0	0	0	0	0	0	0	0	0	0	0	0	0	0	0	0	0	0	0	1	0	0	0	0	0	0
ANO5__chr11	0	0	0	0	0	0	0	0	0	0	1	0	0	0	0	0	0	0	2	0	0	0	0	0	0	0	0	0	0	0	0	0	0	0	0	0	0	0	1	0	0	0	0	0	0	0	0	0	0
ANO6__chr12	0	1	1	1	0	3	2	1	1	0	0	4	2	2	1	1	0	3	0	1	0	0	1	0	2	1	2	2	1	3	6	2	3	1	6	3	3	2	6	2	2	2	3	1	0	0	3	1	1
ANO7__chr2	0	0	0	0	0	0	0	0	0	0	0	0	0	1	0	0	0	0	0	0	0	0	0	0	0	0	0	0	1	0	0	0	0	0	0	0	0	0	0	1	0	0	0	0	0	0	0	0	0
ANO8__chr19	0	0	0	0	0	0	1	0	0	0	0	0	0	1	0	0	0	1	1	0	0	0	1	0	0	0	0	0	0	2	0	0	0	0	1	0	0	0	1	0	0	1	0	0	0	0	0	0	0
ANP32A-IT1__chr15	0	0	0	0	0	0	0	0	3	0	1	0	0	0	0	0	0	0	0	0	0	0	0	0	0	0	0	0	0	0	0	0	0	0	0	0	0	0	0	0	0	1	0	0	0	0	0	0	0
ANP32A__chr15	6	1	6	8.01	0	2	6	2	4	1	7.01	6	3	3	14.02	9.01	0	5	6	3	1	0	7.01	1	5	10.01	7.01	8.01	8.01	22.06	9.01	4	8.01	3	8.01	3	5	5	10.01	7.01	9.01	5	3	12.02	0	0	5	5	8.01
ANP32B__chr9	12.02	9.01	13.02	11.01	0	23.06	23.06	4	18.04	1	23.06	29.1	6	19.04	16.03	12.02	0	20.05	16.03	12.02	6	2	12.02	9.01	18.04	6	31.11	28.09	21.05	34.14	41.2	32.12	25.07	12.02	25.07	20.05	25.07	22.06	35.15	42.21	24.07	29.1	27.09	34.14	0	1	19.04	11.01	14.02
ANP32C__chr4	0	0	0	0	0	0	0	0	0	0	0	0	0	0	0	0	0	0	0	0	0	0	0	0	0	0	0	0	0	0	0	0	0	0	0	0	0	0	0	0	0	0	0	0	0	0	0	0	0
ANP32E__chr1	5	4	9.01	5	0	8.01	12.02	7.01	7.01	1	9.01	7.01	4	5	4	4	0	3	7.01	2	3	2	8.01	7.01	7.01	3	10.01	4	6	18.04	12.02	17.03	21.05	4	17.03	9.01	12.02	12.02	26.08	11.01	11.01	18.04	1	13.02	0	0	10.01	9.01	6
ANPEP__chr15	0	5	2	0	0	0	4	0	4	0	1	1	0	1	4	7.01	0	0	1	2	0	0	3	1	2	4	1	0	0	4	2	1	2	1	0	0	2	0	5	5	2	3	3	8.01	0	0	0	1	0
ANTXR1__chr2	3	3	5	7.01	0	2	1	4	6	0	3	4	4	3	14.02	2	0	5	3	3	2	0	5	0	3	2	2	2	3	5	9.01	13.02	7.01	1	6	3	5	7.01	16.03	11.01	3	8.01	4	12.02	0	0	4	4	8.01
ANTXR2__chr4	2	2	7.01	1	0	3	5	5	7.01	0	2	4	5	4	0	8.01	0	2	11.01	1	4	0	3	4	3	3	5	6	1	10.01	7.01	6	8.01	1	10.01	2	5	8.01	9.01	4	4	15.03	5	9.01	0	1	3	6	3
ANXA10__chr4	0	0	0	0	0	0	0	0	0	0	0	0	0	0	0	0	0	0	0	0	0	0	0	0	0	0	0	1	1	0	0	0	0	0	0	0	0	0	0	0	0	0	0	0	0	0	0	0	0
ANXA11__chr10	3	3	4	2	0	3	4	1	3	0	5	6	1	9.01	6	7.01	0	0	0	4	1	1	2	0	6	1	7.01	2	3	9.01	8.01	5	1	2	10.01	3	4	1	14.02	7.01	2	8.01	2	5	0	0	2	2	3
ANXA13__chr8	0	0	0	0	0	0	0	0	0	0	0	0	0	0	0	0	0	0	0	0	0	0	0	0	0	0	0	0	0	0	0	0	0	0	0	0	0	0	0	0	0	0	0	0	0	0	0	0	0
ANXA1__chr9	4	5	18.04	9.01	0	19.04	7.01	5	5	0	13.02	32.12	9.01	11.01	12.02	16.03	0	11.01	7.01	8.01	3	1	2	2	6	17.03	17.03	11.01	13.02	34.14	19.04	16.03	15.03	11.01	13.02	26.08	12.02	11.01	21.05	9.01	20.05	9.01	25.07	19.04	1	1	16.03	4	25.07
ANXA2P1__chr4	0	0	0	0	0	0	0	0	0	0	0	0	0	0	0	0	0	0	0	0	0	0	0	0	0	0	0	0	0	0	0	0	0	0	0	0	0	0	0	0	0	0	0	1	0	0	0	0	0
ANXA2P2__chr9	0	0	1	0	0	0	0	0	0	0	1	1	2	1	0	1	0	0	0	0	0	0	0	0	0	1	1	0	0	1	0	2	2	0	1	0	0	0	0	1	0	1	1	1	0	0	0	0	1
ANXA2P3__chr10	0	0	0	0	0	0	0	0	0	0	0	0	0	0	0	0	0	0	0	0	0	0	1	0	0	0	0	0	0	0	0	0	0	0	0	0	0	0	0	1	0	0	0	0	0	0	0	0	0
ANXA2R__chr5	0	0	0	0	0	0	0	0	0	0	0	0	0	0	0	0	0	0	0	0	0	0	0	0	0	0	0	0	0	0	0	0	0	0	0	0	0	0	1	0	0	0	0	1	0	0	0	0	0
ANXA2__chr15	53.34	77.72	111.49	37.16	1	83.84	134.16	34.14	77.72	2	73.65	186.14	30.11	94.06	118.69	83.84	2	108.41	77.72	59.42	20.05	9.01	46.25	17.03	80.78	90.99	106.36	106.36	47.27	173.61	164.23	153.83	101.23	26.08	152.8	69.58	106.36	87.93	210.28	126.93	111.49	125.9	90.99	130.03	2	4	74.67	44.23	126.93
ANXA3__chr4	0	1	5	1	0	3	1	0	1	0	4	2	0	0	1	1	0	4	0	0	0	1	0	1	1	2	3	0	2	3	1	4	2	0	6	0	2	3	6	2	0	2	0	2	0	0	2	3	1
ANXA4__chr2	1	1	6	0	0	1	2	0	1	0	2	4	1	1	3	2	0	0	2	1	0	2	1	0	1	0	3	2	1	2	4	3	3	0	1	3	1	4	0	2	0	1	2	6	0	0	1	0	1
ANXA5__chr4	30.11	28.09	66.53	27.09	1	35.15	46.25	37.16	58.41	0	27.09	127.96	43.22	48.28	74.67	39.18	0	47.27	54.35	23.06	20.05	6	32.12	15.03	47.27	44.23	49.29	39.18	47.27	152.8	94.06	93.04	82.82	20.05	88.95	18.04	49.29	47.27	162.15	100.2	32.12	75.69	48.28	89.97	6	1	24.07	40.19	77.72
ANXA6__chr5	3	13.02	6	1	0	4	7.01	1	5	0	3	18.04	3	2	6	7.01	0	7.01	2	1	1	1	3	2	9.01	8.01	3	8.01	6	18.04	5	10.01	15.03	4	9.01	6	6	6	17.03	9.01	1	7.01	8.01	9.01	0	0	4	5	9.01
ANXA7__chr10	1	2	4	2	0	3	7.01	2	4	0	2	16.03	3	5	5	4	0	4	2	2	0	1	5	0	4	0	5	6	3	11.01	7.01	8.01	8.01	4	8.01	5	12.02	3	5	7.01	4	6	3	12.02	1	0	9.01	6	5
ANXA9__chr1	0	0	0	0	0	0	0	0	0	0	0	0	0	0	0	0	0	0	0	0	0	0	0	0	0	0	0	0	0	0	0	0	0	0	0	0	0	0	0	0	0	0	0	0	0	0	0	0	0
AOAH__chr7	0	0	0	0	0	0	0	0	0	0	0	0	0	0	0	0	0	0	0	0	0	0	0	0	0	0	0	0	0	0	0	0	0	0	0	0	0	0	0	0	0	0	0	0	0	0	0	0	0
AOC2__chr17	0	0	0	0	0	0	0	0	0	0	0	0	0	0	0	0	0	1	0	0	0	0	0	0	0	0	0	0	0	0	0	0	0	0	0	0	0	0	0	0	0	1	0	0	0	0	0	0	0
AOC3__chr17	0	0	0	0	0	0	0	0	0	0	0	0	0	0	0	0	0	0	0	0	0	0	0	0	0	0	0	0	0	0	0	0	0	0	0	0	0	0	0	0	0	0	0	0	0	0	0	0	0
AOC4__chr17	0	0	0	0	0	0	0	0	0	0	0	0	0	0	0	0	0	0	0	0	0	0	0	0	0	0	0	0	0	0	0	0	0	0	0	0	0	0	0	0	0	0	0	0	0	0	0	0	0
AOX1__chr2	0	1	0	0	0	0	1	0	0	0	0	1	0	0	3	0	0	0	1	0	0	0	0	0	0	1	2	0	2	5	1	2	1	0	0	0	0	1	5	0	0	2	1	3	0	0	0	0	1
AOX2P__chr2	0	0	0	0	0	0	0	0	0	0	0	0	0	0	0	0	0	0	0	0	0	0	0	0	0	0	0	0	0	0	0	0	0	0	0	0	0	0	0	0	0	0	0	0	0	0	0	0	0
AP1AR__chr4	0	0	0	0	0	1	1	0	0	0	0	1	1	0	1	0	0	0	0	0	0	0	0	0	1	0	1	6	0	3	1	1	3	0	1	0	4	1	1	0	1	0	0	1	0	0	0	1	2
AP1B1__chr22	0	1	3	0	0	2	1	2	4	0	0	1	2	3	2	1	0	0	2	2	0	0	2	1	1	1	4	0	2	2	5	3	10.01	0	4	0	2	2	8.01	4	0	4	3	4	0	0	1	0	4
AP1G1__chr16	1	2	4	1	0	9.01	1	1	4	0	2	10.01	5	6	6	1	0	0	3	1	0	2	1	1	0	0	2	3	0	9.01	7.01	4	4	2	4	0	5	4	3	7.01	4	8.01	0	6	0	0	4	1	3
AP1G2__chr14	0	0	0	0	0	1	0	0	0	0	0	0	0	0	0	0	0	0	0	0	0	0	0	0	0	0	0	0	0	0	0	0	0	0	0	0	0	0	0	0	0	0	1	1	0	0	0	0	0
AP1M1__chr19	1	6	4	1	0	4	8.01	4	8.01	0	3	6	5	1	11.01	3	0	3	1	3	1	0	3	1	7.01	3	4	3	4	9.01	7.01	12.02	5	2	15.03	7.01	8.01	15.03	17.03	21.05	3	12.02	12.02	14.02	0	0	4	6	5
AP1M2__chr19	4	1	1	0	0	2	2	1	2	0	0	0	0	2	2	4	0	2	1	2	1	0	2	0	3	0	0	2	0	6	4	2	10.01	3	6	1	3	1	7.01	4	2	5	3	3	0	0	1	2	3
AP1S1__chr7	1	2	0	1	0	0	0	0	0	0	0	3	1	3	1	0	0	0	1	1	1	0	0	0	0	2	5	0	4	6	0	1	0	0	2	0	3	0	1	3	1	0	3	1	0	0	0	0	1
AP1S2__chrX	1	3	2	2	0	3	2	1	0	0	2	5	0	1	1	5	0	2	2	1	1	0	3	0	1	0	0	6	2	14.02	9.01	2	10.01	1	8.01	2	4	5	6	4	1	4	3	4	0	1	3	1	5
AP1S3__chr2	0	1	0	0	0	3	0	0	1	0	1	1	1	1	3	2	0	0	0	1	0	0	0	0	1	0	0	3	1	2	0	4	1	2	0	1	1	1	3	1	2	0	0	1	0	0	0	0	0
AP2A1__chr19	0	0	3	0	0	0	0	0	1	0	0	0	0	0	0	0	0	1	1	0	0	0	0	0	1	0	0	1	0	2	0	1	1	1	2	0	3	0	0	1	0	0	0	2	0	0	0	0	0
AP2A2__chr11	1	2	2	1	0	6	4	1	10.01	0	2	4	0	4	7.01	5	0	1	2	1	0	0	1	0	3	2	2	2	3	4	7.01	7.01	3	0	5	1	3	3	9.01	6	0	4	6	8.01	0	0	0	1	3
AP2B1__chr17	3	5	7.01	0	0	6	4	7.01	5	0	4	3	2	3	4	1	1	2	0	6	1	1	4	2	0	2	0	5	1	14.02	11.01	6	6	4	11.01	3	13.02	7.01	5	6	3	8.01	8.01	6	0	0	7.01	2	7.01
AP2M1__chr3	5	15.03	5	2	0	9.01	14.02	4	19.04	1	10.01	14.02	5	13.02	23.06	25.07	0	15.03	20.05	6	4	0	9.01	3	22.06	10.01	17.03	10.01	15.03	32.12	33.13	33.13	28.09	3	28.09	12.02	17.03	7.01	38.17	22.06	4	18.04	16.03	34.14	0	1	4	7.01	14.02
AP2S1__chr19	3	14.02	11.01	0	0	14.02	13.02	5	15.03	0	13.02	33.13	10.01	11.01	29.1	13.02	0	12.02	17.03	9.01	3	1	7.01	3	15.03	8.01	24.07	10.01	7.01	25.07	28.09	21.05	20.05	6	20.05	11.01	19.04	20.05	32.12	17.03	11.01	15.03	17.03	32.12	1	2	13.02	13.02	11.01
AP3B1__chr5	5	5	14.02	3	0	5	6	1	7.01	0	3	10.01	2	4	8.01	5	0	14.02	10.01	2	0	1	3	2	2	5	5	7.01	5	9.01	15.03	10.01	12.02	5	13.02	5	8.01	9.01	11.01	14.02	5	5	10.01	5	0	0	4	2	3
AP3D1__chr19	1	2	3	1	0	11.01	1	2	16.03	0	10.01	15.03	0	3	7.01	8.01	0	5	4	4	3	0	1	1	5	3	3	2	2	9.01	11.01	10.01	9.01	2	11.01	7.01	6	5	14.02	7.01	0	6	9.01	13.02	1	0	1	1	6
AP3M1__chr10	3	5	4	7.01	0	2	6	7.01	7.01	0	9.01	10.01	3	6	3	3	0	8.01	4	5	4	1	5	2	2	4	4	6	3	12.02	9.01	8.01	2	4	15.03	3	2	3	24.07	16.03	4	9.01	5	5	1	0	10.01	5	16.03
AP3M2__chr8	0	1	0	0	0	1	0	0	0	0	0	3	1	2	0	1	0	0	2	0	0	0	0	0	0	1	1	0	0	3	7.01	1	4	0	0	1	0	0	1	1	0	0	3	1	0	0	0	1	2
AP3S1__chr5	5	4	7.01	2	0	5	5	1	8.01	0	2	13.02	3	7.01	9.01	9.01	1	4	6	1	1	1	6	3	13.02	3	6	8.01	6	13.02	12.02	5	13.02	5	14.02	3	6	7.01	17.03	5	6	9.01	11.01	3	0	0	6	1	7.01
AP3S2__chr15	0	0	0	0	0	0	0	0	0	0	0	0	0	0	0	0	0	0	0	0	0	0	0	0	0	0	0	0	0	0	0	0	0	0	0	0	0	0	0	0	0	0	0	0	0	0	0	0	0
AP4B1-AS1__chr1	0	0	0	0	0	0	0	0	0	0	0	0	0	0	1	0	0	0	0	0	0	0	0	0	0	0	0	0	0	0	0	0	0	0	0	0	0	0	0	0	0	0	0	0	0	0	0	0	0
AP4B1__chr1	0	0	2	0	0	1	1	1	1	0	1	2	2	4	1	0	0	1	3	1	2	0	1	0	0	1	2	0	2	0	3	3	1	0	4	1	0	1	1	4	1	1	1	2	0	0	2	2	2
AP4E1__chr15	0	0	0	0	0	0	1	1	0	0	0	0	0	0	0	0	0	0	0	2	0	0	0	0	0	1	0	0	0	1	1	0	1	0	0	2	1	1	1	2	0	0	0	2	0	0	0	1	1
AP4M1__chr7	0	0	0	0	0	0	1	0	0	0	0	1	0	0	0	0	0	0	0	0	0	0	0	0	0	1	0	0	0	0	0	0	0	0	0	0	0	0	2	0	1	1	2	0	0	0	0	1	1
AP4S1__chr14	0	0	1	0	0	0	0	0	0	0	0	1	0	0	1	1	0	0	1	1	0	0	1	0	0	0	0	1	0	1	0	0	1	1	0	0	0	0	0	0	0	1	0	0	0	0	0	0	1
AP5B1__chr11	0	0	1	0	0	0	0	0	0	0	0	0	0	0	1	4	0	1	0	1	0	1	0	0	1	1	1	0	0	2	3	4	1	0	0	0	1	0	1	0	0	5	1	1	0	0	0	0	0
AP5M1__chr14	0	0	1	1	0	0	1	2	0	0	1	0	0	2	1	1	0	0	1	0	0	0	0	0	0	2	1	1	0	0	2	2	1	0	2	3	0	1	2	0	1	0	0	1	0	0	1	0	1
AP5S1__chr20	1	1	0	0	0	2	1	0	0	0	1	2	0	1	3	0	0	0	1	0	0	0	1	0	1	0	0	0	1	1	1	0	1	0	0	2	1	0	2	2	0	5	2	1	0	0	1	3	2
AP5Z1__chr7	1	0	0	0	0	0	0	0	0	0	1	0	0	0	2	0	0	0	0	0	0	0	0	0	2	1	1	0	1	1	0	1	0	0	0	0	1	0	0	1	0	1	1	0	0	0	0	0	1
APAF1__chr12	0	2	0	0	0	0	1	0	1	0	0	1	1	2	2	0	0	0	0	0	0	0	0	0	1	2	0	0	0	0	0	1	1	0	1	0	1	0	3	2	0	0	0	0	0	0	0	0	0
APBA1__chr9	0	0	0	0	0	0	0	0	0	0	0	0	0	0	0	0	0	0	0	0	0	0	0	0	0	0	0	0	0	0	0	0	0	0	0	0	0	0	0	0	0	0	0	0	0	0	0	0	0
APBA2__chr15	0	0	0	0	0	3	0	0	1	0	0	0	1	2	3	2	0	0	0	0	0	0	0	0	0	3	2	2	0	1	0	0	0	0	0	2	2	0	1	2	0	1	1	0	0	0	0	0	3
APBA3__chr19	1	0	0	0	0	0	0	1	1	0	0	0	0	0	0	0	0	0	1	0	0	0	1	0	0	0	0	0	0	1	0	1	1	0	0	0	0	0	1	2	0	1	0	1	0	0	0	0	0
APBB1IP__chr10	0	0	0	0	0	0	0	0	0	0	1	0	0	1	0	0	0	0	0	0	0	0	0	0	0	0	0	0	0	0	1	0	0	0	0	0	0	2	0	0	0	0	1	0	0	0	0	0	0
APBB1__chr11	0	0	0	0	0	0	2	0	0	0	0	0	1	0	1	1	0	1	0	1	0	0	0	0	1	1	1	0	1	2	0	2	4	0	0	0	0	1	0	2	0	3	0	2	0	0	0	0	0
APBB2__chr4	0	4	1	1	0	3	4	3	4	0	1	15.03	3	2	8.01	2	0	2	3	0	0	0	1	0	4	6	5	3	4	8.01	11.01	6	1	2	7.01	1	4	3	7.01	4	1	7.01	2	8.01	1	0	2	2	3
APBB3__chr5	1	0	0	0	0	1	0	0	0	0	0	0	0	1	2	0	0	0	0	0	0	0	1	1	0	1	0	1	0	1	2	0	1	0	0	0	1	0	1	2	1	0	0	2	0	0	0	2	2
APC2__chr19	0	0	0	0	0	0	0	0	0	0	0	0	0	0	0	0	0	0	0	0	0	0	0	0	0	0	0	0	0	0	0	0	0	0	1	0	0	0	0	0	0	0	0	0	0	0	0	0	0
APCDD1L-AS1__chr20	0	0	0	0	0	0	0	1	0	0	0	0	1	0	0	0	0	0	0	0	0	0	0	0	0	0	0	0	0	0	0	0	0	0	0	0	0	0	0	0	0	0	2	0	0	0	0	0	0
APCDD1L__chr20	0	1	0	0	0	0	0	0	0	0	0	0	0	0	0	1	0	0	0	0	0	0	0	0	0	0	0	0	0	0	0	0	0	0	0	1	0	0	0	0	0	0	0	0	0	0	0	0	0
APC__chr5	1	0	0	2	0	3	2	1	1	0	2	6	0	3	1	3	0	3	2	1	0	0	3	0	3	1	3	3	1	0	5	1	2	1	0	0	4	3	4	3	1	1	3	5	1	0	3	1	4
APEH__chr3	1	0	1	0	0	2	0	1	3	0	1	3	0	2	3	1	0	5	4	0	1	0	1	0	1	1	1	1	0	2	5	1	5	0	1	1	2	0	4	7.01	1	3	5	3	0	0	2	1	0
APEX1__chr14	12.02	12.02	11.01	8.01	0	9.01	15.03	5	20.05	0	11.01	35.15	8.01	16.03	24.07	4	2	7.01	7.01	14.02	2	0	14.02	3	9.01	9.01	12.02	25.07	19.04	31.11	20.05	17.03	20.05	7.01	22.06	22.06	14.02	15.03	25.07	12.02	11.01	17.03	9.01	20.05	2	1	6	5	18.04
APEX2__chrX	2	2	0	0	0	3	2	4	2	0	2	5	2	4	5	1	0	2	2	0	1	0	3	0	0	0	0	2	3	5	12.02	2	1	2	3	1	1	3	3	5	1	3	2	0	0	0	2	2	5
APH1A__chr1	0	1	0	0	0	0	0	0	0	0	3	2	0	1	0	0	0	3	0	1	0	0	0	2	3	0	2	4	0	5	0	1	1	0	2	2	4	0	2	2	0	0	0	0	0	0	1	1	0
APH1B__chr15	0	0	0	0	0	0	0	0	1	0	0	1	1	0	1	2	0	0	0	1	0	0	0	0	0	0	0	2	0	0	1	2	0	1	3	0	0	1	0	0	0	2	0	0	0	0	0	1	2
API5__chr11	2	4	9.01	1	0	6	3	2	6	0	2	7.01	1	3	6	3	0	5	3	1	2	1	4	0	5	4	4	7.01	0	18.04	3	3	8.01	6	4	2	4	4	5	7.01	6	6	3	6	0	0	0	5	10.01
APIP__chr11	0	0	1	2	0	3	2	1	1	0	0	1	0	0	0	3	0	0	3	1	2	0	0	2	2	0	0	0	0	0	4	1	0	1	3	2	2	1	2	1	0	0	1	2	0	0	0	0	0
APITD1-CORT__chr1	0	0	0	0	0	1	0	0	0	0	0	0	0	0	0	0	0	0	0	0	0	0	0	0	0	0	0	0	0	0	0	0	0	0	0	0	0	0	0	0	0	0	0	0	0	0	0	0	0
APITD1__chr1	1	1	0	1	0	1	0	0	0	0	0	2	0	2	2	0	0	0	2	1	0	0	0	0	0	0	1	0	1	4	1	0	2	0	2	1	0	1	3	0	0	1	1	0	0	0	0	0	2
APLF__chr2	0	0	1	0	0	0	1	0	0	0	0	0	0	0	0	0	0	0	0	2	0	0	1	0	0	0	0	0	0	0	0	0	0	0	0	0	0	0	0	0	0	0	0	0	0	0	0	1	0
APLN__chrX	0	0	0	0	0	0	0	0	0	0	0	0	0	0	0	0	0	0	0	0	0	0	0	0	0	0	0	0	0	2	0	0	0	0	0	0	0	0	0	0	0	0	0	0	0	0	0	0	0
APLP1__chr19	0	0	3	0	0	0	0	0	0	0	0	5	0	1	1	1	0	0	1	0	0	0	0	0	1	0	0	0	1	1	1	3	1	2	2	0	2	0	1	0	2	2	0	0	0	0	0	0	0
APLP2__chr11	8.01	29.1	12.02	4	0	15.03	9.01	4	16.03	2	13.02	36.15	12.02	12.02	15.03	22.06	1	9.01	20.05	11.01	4	2	10.01	9.01	11.01	15.03	15.03	19.04	16.03	55.37	25.07	36.15	24.07	4	27.09	13.02	21.05	15.03	38.17	23.06	18.04	34.14	33.13	29.1	0	1	21.05	8.01	23.06
APMAP__chr20	2	6	4	4	0	2	9.01	5	1	0	5	12.02	8.01	6	7.01	7.01	0	4	3	1	3	2	7.01	2	4	3	12.02	6	2	14.02	8.01	10.01	7.01	1	6	1	9.01	2	10.01	13.02	7.01	14.02	7.01	14.02	1	0	3	4	8.01
APOA1BP__chr1	1	0	2	1	0	3	1	0	0	0	0	1	1	5	1	1	0	1	1	1	0	0	1	0	0	3	4	2	0	1	2	5	4	0	4	5	5	2	2	2	3	2	1	2	0	0	2	1	2
APOA5__chr11	0	0	0	0	0	0	0	0	0	0	0	0	0	0	0	0	0	0	0	0	0	0	0	0	0	0	0	0	0	0	0	0	0	0	0	0	0	0	0	0	0	0	0	0	0	0	0	0	0
APOBEC3A__chr22	0	0	0	0	0	0	0	0	0	0	0	0	0	0	0	0	0	0	0	0	0	0	0	0	0	0	0	0	0	0	0	0	0	0	0	0	0	0	0	0	0	0	0	0	0	0	0	0	0
APOBEC3B__chr22	0	0	0	0	0	0	2	0	1	0	0	2	0	0	0	1	0	1	1	1	0	0	0	0	0	0	0	1	0	0	1	3	0	1	0	1	2	0	1	0	0	0	0	0	0	0	0	0	0
APOBEC3C__chr22	0	1	0	0	0	2	0	0	1	0	0	2	1	0	0	1	0	2	3	0	1	0	0	0	3	0	1	0	0	0	1	1	1	0	0	0	3	0	1	0	0	0	1	2	0	0	0	1	0
APOBEC3D__chr22	0	0	0	0	0	0	0	0	0	0	0	0	0	0	0	0	0	0	0	0	0	0	0	0	0	0	0	0	0	0	0	0	0	0	0	0	0	0	0	0	0	0	0	1	0	0	0	0	0
APOBEC3F__chr22	0	0	0	0	0	1	0	0	0	0	0	0	0	0	0	0	0	0	0	0	0	0	0	0	0	0	0	0	0	1	0	1	0	0	0	1	0	0	0	0	0	0	1	0	0	0	0	0	1
APOBEC3G__chr22	0	0	0	0	0	0	0	0	0	0	0	0	0	0	0	0	0	0	0	0	0	0	0	0	0	0	0	0	0	0	0	0	0	0	0	0	0	0	0	0	0	0	0	0	0	0	0	0	0
APOBEC4__chr1	0	0	0	0	0	0	0	0	0	0	0	0	0	0	0	0	0	0	0	0	0	0	0	0	0	0	0	0	0	0	0	0	0	0	0	0	0	0	0	0	0	0	0	0	0	0	0	0	0
APOBR__chr16	0	0	0	0	0	0	0	0	0	0	0	0	0	0	0	0	0	0	0	0	0	0	0	0	0	0	0	0	0	0	0	0	0	0	0	0	0	0	0	0	0	0	0	0	0	0	0	0	0
APOC1P1__chr19	0	0	0	0	0	0	0	0	0	0	0	0	0	0	0	0	0	0	0	0	0	0	0	0	0	0	1	0	0	0	0	0	0	0	0	0	0	0	1	0	0	0	0	0	0	0	0	0	0
APOC1__chr19	0	0	0	0	0	0	0	0	0	0	0	0	0	0	0	0	0	0	0	0	0	0	0	0	0	0	0	0	0	0	0	0	0	0	0	0	0	0	0	0	0	0	0	0	0	0	0	0	0
APOE__chr19	0	0	0	0	0	0	0	0	0	0	0	0	0	0	0	0	0	0	0	0	0	0	0	0	0	0	0	0	0	0	0	0	0	0	0	0	0	0	0	0	0	0	0	0	0	0	0	0	0
APOF__chr12	0	0	0	0	0	0	0	0	0	0	0	0	0	0	0	0	0	0	0	0	0	0	0	0	0	0	0	0	0	0	0	0	0	0	0	0	0	0	0	0	0	0	0	0	0	0	0	0	0
APOL1__chr22	0	0	0	0	0	0	0	0	0	0	0	0	0	0	0	0	0	0	0	0	0	0	0	0	0	0	0	0	0	0	0	0	0	0	0	0	0	0	0	0	0	0	0	0	0	0	0	0	0
APOL2__chr22	0	0	1	0	0	0	0	0	1	0	1	4	0	0	0	0	0	0	0	0	0	0	0	0	1	0	0	0	0	1	2	1	2	0	0	0	0	1	2	1	0	1	0	0	0	0	0	1	0
APOL3__chr22	0	0	0	0	0	0	0	0	0	0	0	0	0	0	0	0	0	0	0	0	0	0	0	0	0	0	0	0	0	0	0	0	0	0	0	0	0	0	0	0	0	0	0	0	0	0	0	0	0
APOL4__chr22	1	0	0	0	0	0	0	1	0	0	0	0	0	0	1	0	0	0	0	0	0	0	0	0	1	0	0	0	0	0	1	0	0	0	0	0	0	0	0	0	0	0	0	0	0	0	0	0	0
APOL6__chr22	0	0	2	0	0	1	1	0	3	0	0	2	0	2	2	1	0	0	1	0	0	0	0	0	1	2	3	1	0	1	0	1	0	0	2	0	4	0	0	4	1	0	2	2	0	0	2	1	2
APOLD1__chr12	1	2	2	1	0	2	3	1	1	0	2	1	0	0	0	0	0	0	3	1	2	0	0	0	0	1	0	3	1	3	0	4	7.01	3	4	0	0	1	3	0	0	4	4	4	0	0	0	2	1
APOM__chr6	0	0	0	1	0	0	0	0	0	0	0	0	0	0	1	0	0	1	1	0	0	0	0	0	0	0	0	0	0	0	0	0	0	0	0	0	0	1	0	1	0	1	0	0	0	0	0	0	0
APOOL__chrX	0	2	5	0	1	2	1	0	2	0	1	4	0	3	3	1	0	0	0	4	1	0	1	0	1	0	3	0	2	2	2	0	2	2	6	4	1	2	3	2	1	2	1	0	0	1	2	2	1
APOO__chrX	0	0	1	0	0	0	1	0	0	0	0	6	1	1	3	2	0	3	2	0	0	0	2	0	2	0	0	2	0	3	2	0	0	0	2	1	2	1	2	2	0	0	0	3	0	0	0	1	1
APOPT1__chr14	1	1	1	0	0	1	0	2	3	0	2	0	1	1	2	1	0	1	1	1	0	1	1	0	0	0	1	0	0	1	1	3	1	1	1	1	0	3	2	5	1	1	0	0	0	0	2	1	0
APPBP2__chr17	1	2	2	0	0	1	1	0	2	0	6	10.01	1	3	4	1	0	1	2	3	0	0	0	1	2	3	5	1	2	4	6	2	2	0	4	2	6	0	2	5	4	4	2	8.01	0	0	3	0	0
APPL1__chr3	0	3	5	1	0	1	5	2	6	0	1	2	1	3	2	5	0	2	2	4	0	0	0	2	3	0	2	1	2	5	3	3	3	0	2	3	0	3	4	7.01	1	3	2	7.01	0	0	4	2	5
APPL2__chr12	5	9.01	7.01	3	0	13.02	6	4	7.01	0	9.01	14.02	4	7.01	12.02	4	0	2	1	3	1	1	2	0	3	7.01	5	10.01	5	15.03	19.04	13.02	8.01	4	21.05	7.01	7.01	2	17.03	13.02	3	8.01	8.01	15.03	0	0	2	3	8.01
APP__chr21	1	8.01	5	3	0	12.02	8.01	1	13.02	1	8.01	12.02	5	7.01	9.01	9.01	0	7.01	9.01	11.01	6	0	8.01	3	7.01	13.02	20.05	10.01	6	16.03	21.05	18.04	17.03	2	10.01	8.01	11.01	5	19.04	22.06	6	9.01	11.01	12.02	1	1	4	5	20.05
APRT__chr16	2	2	7.01	0	0	1	3	0	3	0	0	3	1	2	9.01	3	0	3	1	0	0	0	1	0	2	2	3	1	1	3	2	6	5	2	8.01	0	2	2	5	4	1	3	0	5	0	0	2	0	2
APTX__chr9	1	0	3	2	0	1	2	2	2	0	1	5	0	1	6	1	0	0	1	0	0	0	0	0	0	2	6	0	2	1	4	3	3	0	2	1	2	1	6	0	1	5	1	4	0	0	2	1	2
AQP11__chr11	0	0	0	0	0	0	0	0	0	0	0	0	0	0	0	0	0	0	0	0	0	0	0	0	0	0	0	0	1	0	1	0	0	0	0	0	0	1	0	0	0	0	0	2	0	0	0	0	0
AQP7P1__chr9	0	0	0	0	0	0	0	0	0	0	0	0	0	0	0	0	0	0	0	0	0	0	0	0	0	0	0	0	0	0	0	0	0	0	0	0	0	0	0	0	0	0	0	0	0	0	0	0	0
AQP7P3__chr9	0	0	0	0	0	0	0	0	0	0	0	0	0	0	0	0	0	0	0	0	0	0	0	0	0	0	0	0	0	0	0	0	0	0	0	0	0	0	0	0	0	0	0	0	0	0	0	0	0
AQP8__chr16	0	0	0	0	0	0	0	0	0	0	0	0	0	0	0	0	0	0	0	0	0	0	0	0	0	0	0	0	0	0	0	0	0	0	0	0	0	0	0	0	0	0	0	0	0	0	0	0	0
AQPEP__chr5	0	0	0	0	0	0	0	0	0	0	0	0	0	0	0	0	0	0	0	0	0	0	0	0	0	0	0	0	0	0	0	0	0	0	0	0	0	0	0	0	0	0	0	0	0	0	0	0	0
AQR__chr15	2	0	3	2	0	4	2	1	4	0	2	1	1	0	2	1	1	3	1	1	0	0	0	0	1	1	2	4	1	2	1	1	0	1	5	1	0	1	2	2	2	3	0	6	0	0	0	0	0
ARAF__chrX	0	0	1	0	0	2	3	0	1	0	1	2	1	0	1	0	0	0	0	2	0	0	0	0	2	4	3	0	1	2	4	2	6	0	0	2	0	3	2	2	1	3	0	4	0	0	0	5	3
ARAP1__chr11	0	0	2	0	0	0	0	0	0	0	0	2	0	0	0	0	0	0	0	1	0	0	1	0	0	1	1	0	0	0	0	0	0	0	1	0	0	0	0	0	0	1	1	2	0	0	0	0	0
ARAP2__chr4	0	0	0	0	0	0	1	0	0	0	0	0	0	2	0	0	0	0	0	0	0	0	0	0	0	0	1	1	0	0	2	1	0	0	0	0	3	1	0	0	0	0	1	0	0	0	0	0	0
ARAP3__chr5	0	0	0	0	0	1	1	0	0	0	0	0	1	1	0	0	0	2	0	1	1	0	0	0	1	1	3	3	0	5	3	1	0	0	4	0	1	2	4	0	0	0	1	2	0	0	1	0	0
ARCN1__chr11	3	3	11.01	6	0	10.01	11.01	1	12.02	0	9.01	15.03	5	13.02	16.03	14.02	1	10.01	10.01	8.01	0	0	6	3	8.01	9.01	14.02	19.04	6	18.04	17.03	12.02	14.02	5	13.02	10.01	12.02	6	26.08	6	4	10.01	10.01	13.02	1	0	10.01	12.02	13.02
ARC__chr8	0	0	0	0	0	0	0	0	0	0	0	0	0	0	0	0	0	0	0	0	0	0	0	0	0	0	0	0	0	0	0	0	0	0	0	0	0	0	0	0	0	0	0	0	0	0	0	0	0
ARF1__chr1	9.01	17.03	25.07	7.01	0	21.05	19.04	7.01	19.04	1	13.02	32.12	7.01	16.03	23.06	22.06	0	22.06	19.04	10.01	8.01	2	13.02	7.01	22.06	21.05	25.07	17.03	15.03	26.08	32.12	38.17	29.1	7.01	38.17	10.01	29.1	15.03	48.28	31.11	16.03	30.11	23.06	38.17	0	0	11.01	22.06	18.04
ARF3__chr12	8.01	9.01	15.03	6	1	15.03	18.04	6	8.01	0	2	26.08	10.01	13.02	14.02	13.02	0	12.02	12.02	4	2	1	7.01	4	13.02	9.01	13.02	5	12.02	27.09	26.08	21.05	17.03	3	21.05	3	21.05	17.03	23.06	30.11	5	14.02	14.02	25.07	0	1	1	5	13.02
ARF4__chr3	10.01	11.01	30.11	9.01	0	19.04	14.02	5	17.03	0	22.06	75.69	12.02	13.02	31.11	23.06	1	23.06	17.03	6	7.01	4	28.09	10.01	20.05	18.04	30.11	26.08	28.09	55.37	42.21	26.08	40.19	13.02	31.11	37.16	37.16	18.04	50.3	35.15	36.15	34.14	17.03	27.09	2	1	26.08	25.07	60.44
ARF5__chr7	1	0	3	0	0	0	4	0	3	0	2	6	0	1	6	3	0	3	4	2	0	0	2	1	8.01	1	3	3	0	1	7.01	5	5	1	1	1	7.01	0	8.01	3	3	3	0	2	0	0	2	4	3
ARF6__chr14	6	6	9.01	2	0	6	7.01	8.01	5	1	9.01	20.05	8.01	11.01	12.02	12.02	0	6	8.01	6	2	0	13.02	2	11.01	2	11.01	10.01	5	29.1	14.02	19.04	14.02	7.01	13.02	7.01	7.01	7.01	16.03	9.01	9.01	13.02	10.01	12.02	0	0	11.01	11.01	4
ARFGAP1__chr20	0	0	1	1	0	2	0	1	3	0	0	4	0	0	3	1	0	1	0	1	0	0	1	0	1	2	4	0	1	2	0	2	0	0	3	2	3	0	1	3	0	0	0	4	0	0	0	1	2
ARFGAP2__chr11	0	0	0	0	0	2	5	0	0	0	2	2	0	2	0	1	0	1	0	0	0	0	1	0	0	3	1	1	1	3	1	2	1	0	5	0	1	2	1	3	1	4	2	0	0	1	0	1	2
ARFGAP3__chr22	2	2	0	3	0	2	4	1	4	0	2	5	0	1	2	1	0	5	3	1	2	3	0	0	2	0	2	2	0	7.01	2	3	4	2	1	1	3	2	2	2	1	5	2	4	0	0	0	2	0
ARFGEF1__chr8	1	3	0	0	0	1	3	3	1	0	0	1	3	0	2	5	1	3	0	2	0	0	1	0	1	1	3	0	1	4	5	2	3	3	1	3	2	2	0	5	2	2	3	5	0	0	2	1	1
ARFGEF2__chr20	0	0	0	2	0	1	1	0	0	0	0	9.01	0	0	5	1	0	3	0	0	0	1	0	1	4	1	1	6	2	4	1	2	0	0	2	3	0	0	2	3	2	1	2	3	0	0	1	3	3
ARFIP1__chr4	1	1	0	5	0	2	0	0	0	0	0	8.01	1	2	5	0	0	1	1	1	0	0	1	0	3	4	2	2	2	8.01	2	3	2	2	2	5	0	3	3	3	1	2	3	4	0	0	2	3	2
ARFIP2__chr11	0	2	0	0	0	1	3	0	2	0	1	2	5	1	2	0	0	3	1	0	1	0	1	0	3	2	3	0	1	2	0	2	2	1	3	1	1	2	1	3	0	1	1	1	0	0	1	0	5
ARFRP1__chr20	0	0	1	1	0	0	0	0	0	0	0	1	0	1	1	0	0	0	1	0	0	0	0	0	1	1	1	1	0	1	1	2	0	0	0	0	0	1	1	0	0	1	1	2	0	0	0	0	1
ARG2__chr14	0	0	0	0	0	0	0	0	0	0	0	0	0	0	2	0	0	0	0	0	0	0	0	0	0	0	0	0	0	1	0	1	0	0	0	0	0	1	0	1	0	1	0	1	0	0	0	0	0
ARGFX__chr3	0	0	0	0	0	0	0	0	0	0	0	0	0	0	0	0	0	0	1	0	0	0	0	0	0	0	0	0	0	0	0	1	0	0	0	0	0	0	0	0	0	0	0	0	0	0	0	0	0
ARGLU1__chr13	2	2	0	2	0	1	2	1	1	0	1	7.01	2	1	5	1	0	3	0	0	3	0	1	0	2	0	6	4	4	9.01	7.01	3	5	1	2	3	3	3	0	1	1	5	0	6	1	0	2	0	4
ARHGAP10__chr4	0	2	0	0	0	0	1	1	2	0	1	3	1	4	5	3	0	2	3	1	1	0	3	0	1	4	1	0	1	4	2	3	1	0	2	0	3	0	1	3	0	1	0	3	0	0	0	1	0
ARHGAP11A__chr15	2	3	10.01	0	0	4	5	4	11.01	0	3	5	5	3	2	5	0	2	0	3	1	0	6	3	1	0	2	4	1	5	20.05	16.03	12.02	2	11.01	7.01	21.05	10.01	23.06	9.01	7.01	12.02	8.01	13.02	0	0	6	6	1
ARHGAP11B__chr15	0	0	0	0	0	0	0	0	0	0	0	0	0	0	0	0	0	0	0	0	0	0	0	0	0	0	0	0	0	0	0	0	0	0	0	0	0	0	0	0	0	0	0	0	0	0	0	0	0
ARHGAP12__chr10	1	3	1	2	0	2	0	1	2	0	1	2	0	0	2	3	1	0	0	1	0	0	0	1	0	1	1	2	0	1	1	1	2	2	0	1	2	2	3	2	1	1	0	6	0	0	2	0	3
ARHGAP17__chr16	0	2	2	1	0	0	4	1	0	0	0	3	0	2	5	3	0	2	2	1	0	2	0	0	4	0	3	4	2	3	5	0	5	1	5	2	3	2	0	3	2	2	4	6	0	0	3	2	3
ARHGAP18__chr6	4	4	8.01	6	0	5	5	0	7.01	0	1	10.01	2	5	12.02	3	0	2	6	2	2	0	3	6	10.01	7.01	6	11.01	2	17.03	12.02	5	8.01	3	13.02	2	12.02	2	8.01	1	5	4	5	9.01	0	1	5	1	10.01
ARHGAP19__chr10	1	3	1	0	0	4	1	1	1	0	0	2	0	1	0	0	0	0	0	2	0	0	1	1	0	0	0	0	0	4	1	2	3	0	7.01	2	1	1	3	1	0	3	0	3	0	0	0	1	0
ARHGAP1__chr11	2	4	7.01	0	0	6	5	5	11.01	0	4	11.01	2	2	8.01	7.01	1	5	4	1	0	1	1	0	6	2	5	0	4	16.03	14.02	5	4	1	10.01	2	5	8.01	12.02	5	2	4	5	9.01	0	0	3	5	10.01
ARHGAP21__chr10	2	2	4	5	0	3	5	4	6	0	5	8.01	1	5	1	6	0	6	3	4	0	1	6	3	3	0	0	1	1	5	12.02	9.01	9.01	5	6	6	2	3	8.01	8.01	3	11.01	2	9.01	0	1	3	3	2
ARHGAP22__chr10	0	3	3	1	0	2	2	0	1	0	2	5	2	0	4	5	0	7.01	2	1	0	0	3	2	6	3	3	1	1	6	4	4	4	0	5	1	4	3	11.01	3	0	8.01	1	8.01	0	0	1	2	4
ARHGAP23__chr17	6	7.01	3	1	0	6	6	3	16.03	0	4	11.01	1	7.01	16.03	4	1	8.01	3	5	2	2	5	3	4	3	7.01	2	12.02	17.03	3	10.01	9.01	3	6	11.01	6	6	21.05	16.03	4	8.01	10.01	10.01	0	0	1	4	14.02
ARHGAP24__chr4	0	0	2	0	0	0	0	0	0	0	0	0	0	0	0	0	0	0	0	0	0	0	0	1	1	0	0	0	0	0	0	0	0	0	0	0	0	0	1	0	0	1	1	0	0	0	0	0	0
ARHGAP26__chr5	0	1	0	0	0	0	2	2	1	0	0	1	0	0	0	0	0	0	0	0	0	0	0	0	1	0	0	0	0	1	1	0	1	0	1	0	0	0	0	0	1	0	0	0	0	0	0	0	2
ARHGAP27__chr17	0	1	0	0	0	1	0	0	0	0	0	0	0	0	0	0	0	0	0	0	0	0	1	0	0	0	0	0	0	1	1	0	0	0	0	0	1	0	0	0	0	0	0	2	0	0	0	0	0
ARHGAP29__chr1	7.01	7.01	8.01	1	0	10.01	9.01	4	9.01	1	6	28.09	8.01	9.01	34.14	2	0	11.01	4	3	3	1	6	3	6	1	18.04	8.01	5	10.01	16.03	21.05	12.02	4	18.04	4	3	15.03	19.04	18.04	7.01	13.02	13.02	20.05	0	0	10.01	2	8.01
ARHGAP30__chr1	0	0	0	0	0	0	0	0	0	0	0	0	0	0	0	0	0	0	0	0	0	0	0	0	0	0	0	0	0	0	0	0	0	0	0	0	0	0	0	0	0	0	0	0	0	0	0	0	0
ARHGAP31__chr3	0	0	1	0	0	0	0	0	1	0	2	2	0	1	1	0	0	1	0	0	0	0	0	0	0	1	0	0	0	1	0	0	1	1	1	0	1	0	0	0	0	1	0	0	0	0	0	1	0
ARHGAP32__chr11	1	0	0	0	0	1	1	1	0	0	0	0	0	1	0	0	0	1	0	0	0	0	1	1	0	0	2	1	2	1	0	0	0	3	2	1	3	1	0	0	0	1	0	0	0	0	0	0	1
ARHGAP33__chr19	0	0	1	0	0	1	2	0	1	0	0	0	0	0	1	0	0	0	0	0	0	0	0	1	1	0	0	2	2	0	3	2	0	0	4	1	1	2	3	1	0	3	0	0	0	0	0	2	0
ARHGAP35__chr19	2	1	5	1	0	5	3	3	6	0	3	0	3	4	11.01	1	0	2	4	4	0	3	0	1	1	2	3	3	2	8.01	5	9.01	8.01	1	13.02	1	7.01	2	12.02	2	4	8.01	8.01	6	0	1	4	1	1
ARHGAP39__chr8	0	0	0	0	0	1	1	0	0	0	0	0	0	0	0	1	0	0	0	0	0	0	0	1	0	0	0	0	0	1	0	0	0	0	0	0	0	0	0	0	0	1	0	0	0	0	0	0	0
ARHGAP42__chr11	0	0	0	0	0	0	3	0	0	0	1	0	0	0	0	0	0	0	0	0	0	0	0	0	0	0	1	0	0	0	0	0	2	0	1	0	0	0	0	0	0	0	0	1	0	0	0	0	0
ARHGAP5-AS1__chr14	0	0	0	0	0	0	0	0	0	0	0	0	0	0	0	0	0	0	0	0	0	0	0	0	0	0	0	0	0	1	0	0	0	0	0	0	1	0	0	0	0	0	0	0	0	0	0	0	0
ARHGAP5__chr14	2	0	7.01	5	0	3	8.01	1	4	0	1	9.01	1	4	2	0	0	2	7.01	2	3	1	2	0	1	4	1	4	0	2	7.01	1	3	0	5	0	5	6	10.01	3	3	5	2	4	1	0	1	0	2
ARHGAP6__chrX	0	0	0	1	0	0	0	0	0	0	0	0	0	0	0	0	1	0	0	0	0	0	0	0	0	0	0	0	0	0	0	0	0	0	0	0	0	0	0	0	0	0	0	0	0	0	0	0	0
ARHGAP9__chr12	0	0	0	0	0	0	0	0	0	0	0	0	0	0	0	0	0	0	0	0	0	0	0	0	0	0	0	0	0	0	0	0	0	0	0	0	0	0	0	0	0	0	0	0	0	0	0	0	0
ARHGDIA__chr17	10.01	14.02	11.01	2	0	13.02	23.06	10.01	29.1	0	4	19.04	15.03	8.01	19.04	22.06	0	37.16	18.04	13.02	3	0	13.02	2	14.02	12.02	17.03	5	14.02	21.05	39.18	50.3	28.09	3	32.12	10.01	30.11	16.03	51.31	47.27	7.01	25.07	32.12	44.23	0	0	1	18.04	11.01
ARHGDIB__chr12	0	1	0	1	0	0	2	0	4	0	2	2	0	0	1	0	0	1	2	0	0	0	2	0	0	2	3	1	1	1	1	2	3	3	1	1	2	0	2	3	1	4	0	3	0	0	0	6	4
ARHGEF10L__chr1	1	0	2	0	0	1	0	0	0	0	0	1	0	0	0	0	0	1	0	0	0	0	2	0	0	1	0	0	0	3	1	1	0	0	0	0	0	0	0	0	0	0	0	1	0	0	0	0	0
ARHGEF10__chr8	1	0	4	1	0	4	1	3	0	0	1	5	0	0	3	1	0	1	1	1	0	0	1	0	5	1	2	3	1	6	3	0	4	1	4	0	3	3	3	1	1	1	1	1	0	0	2	1	0
ARHGEF11__chr1	0	1	0	0	0	0	0	0	0	0	0	1	0	0	1	0	0	0	0	1	0	0	0	0	1	0	0	0	0	0	1	0	0	0	0	1	0	0	2	0	0	0	0	0	0	0	0	0	0
ARHGEF12__chr11	0	2	4	1	0	10.01	3	0	5	0	1	6	2	4	7.01	10.01	0	3	5	1	1	1	5	2	6	10.01	6	5	2	12.02	12.02	2	5	2	11.01	5	2	9.01	13.02	11.01	3	10.01	8.01	7.01	0	1	5	0	9.01
ARHGEF17__chr11	0	0	0	0	0	2	0	0	1	0	0	0	0	0	0	2	0	1	1	1	0	0	0	0	2	0	1	0	0	0	0	1	3	1	2	0	0	0	1	1	0	4	0	1	0	0	1	1	2
ARHGEF18__chr19	0	1	0	0	0	0	0	0	1	0	0	2	0	1	0	2	0	0	1	1	1	0	0	0	1	0	3	0	0	1	2	3	0	1	2	0	1	0	1	0	0	1	0	3	0	0	0	1	1
ARHGEF19__chr1	0	0	0	0	0	0	0	0	0	0	0	0	0	0	0	0	0	0	0	0	0	0	0	0	0	0	0	0	0	0	0	0	0	0	0	0	0	0	0	0	0	0	0	0	0	0	0	0	0
ARHGEF1__chr19	0	1	1	0	0	3	0	0	0	0	1	1	0	1	0	0	0	1	1	1	0	0	1	0	1	0	0	0	0	1	3	1	1	0	2	1	2	2	1	2	1	2	3	2	0	0	0	0	1
ARHGEF25__chr12	0	0	0	0	0	0	0	0	0	0	0	0	0	0	1	0	0	0	0	0	0	0	0	0	0	0	0	0	0	0	0	0	0	0	1	0	0	0	0	0	0	0	0	0	0	0	0	0	1
ARHGEF26-AS1__chr3	0	0	0	0	0	0	0	0	0	0	0	0	0	0	0	1	0	0	0	0	0	0	0	0	0	0	0	0	0	0	1	0	0	0	0	0	0	0	0	1	0	0	0	0	0	0	0	0	0
ARHGEF26__chr3	1	0	0	0	0	0	0	2	2	0	0	4	0	0	4	2	0	3	0	0	0	0	0	1	3	1	2	1	1	2	0	4	1	0	0	0	0	0	2	1	0	3	1	0	0	0	0	0	0
ARHGEF28__chr5	1	1	1	0	0	2	2	0	0	0	1	3	0	5	5	1	0	1	2	1	0	0	1	2	2	0	3	3	0	3	2	6	5	2	2	4	3	3	3	6	4	7.01	4	8.01	0	0	1	4	1
ARHGEF2__chr1	3	1	0	0	0	1	1	0	6	0	0	4	0	2	2	2	0	2	0	1	0	0	4	1	3	2	2	1	0	6	6	1	5	2	6	4	3	2	6	5	1	3	7.01	3	0	0	0	1	6
ARHGEF35__chr7	0	0	0	0	0	0	0	0	0	0	0	0	0	0	0	0	0	0	0	0	0	0	0	0	1	0	1	0	0	1	0	0	0	0	0	0	0	0	0	0	0	0	0	0	0	0	0	0	0
ARHGEF37__chr5	0	0	0	0	0	0	0	0	0	0	0	1	0	0	0	0	0	0	0	0	0	0	0	0	0	0	0	0	0	0	0	0	0	0	0	0	0	0	0	0	0	0	0	0	0	0	0	0	0
ARHGEF38__chr4	0	0	0	0	0	0	0	0	0	0	0	0	0	0	0	0	0	0	0	0	0	0	0	0	0	0	0	0	0	0	0	0	0	0	0	0	0	0	0	0	0	0	0	0	0	0	0	0	0
ARHGEF39__chr9	0	0	0	0	0	0	0	0	0	0	0	0	0	0	0	1	0	1	0	0	0	0	0	0	0	0	0	0	0	1	2	0	1	0	0	0	0	0	0	0	0	0	0	0	0	0	0	0	0
ARHGEF3__chr3	0	2	0	1	0	0	0	0	0	0	0	0	0	0	0	0	0	0	1	0	0	0	0	0	0	0	1	0	0	1	0	0	0	0	0	0	0	0	0	0	0	0	0	1	0	0	0	0	0
ARHGEF40__chr14	0	0	2	1	0	4	5	3	0	1	2	1	0	2	4	1	0	3	3	1	1	0	0	0	2	2	2	0	3	3	5	1	2	1	1	1	2	1	5	4	3	3	5	4	0	0	1	0	1
ARHGEF5__chr7	0	0	0	0	0	0	0	0	0	0	0	0	0	1	0	0	0	0	0	0	0	0	0	0	0	0	0	0	0	0	0	0	0	0	1	0	0	0	0	0	0	0	0	0	0	0	0	0	0
ARHGEF6__chrX	0	0	0	0	0	0	1	0	0	0	1	0	0	1	0	0	0	0	0	1	0	0	1	0	0	0	0	0	0	1	3	0	0	0	1	0	0	0	0	0	0	0	1	0	0	0	0	0	0
ARHGEF7__chr13	2	0	0	0	0	0	2	0	2	0	0	2	0	1	0	2	0	1	1	1	1	0	1	1	4	0	1	0	1	3	1	1	3	0	1	0	1	1	0	0	2	0	1	1	0	0	0	2	0
ARHGEF9__chrX	0	0	1	0	0	0	0	0	0	0	0	1	0	1	3	0	0	0	0	1	0	0	0	0	0	2	1	1	2	0	0	0	0	0	0	0	0	1	6	0	1	1	0	1	0	0	1	0	1
ARID1A__chr1	6	4	8.01	2	0	7.01	4	1	4	1	2	8.01	3	6	5	3	0	9.01	1	2	2	1	4	5	0	2	8.01	9.01	6	10.01	8.01	16.03	9.01	6	10.01	5	9.01	5	11.01	11.01	3	6	6	7.01	0	0	4	5	5
ARID1B__chr6	0	1	3	3	0	2	1	1	3	0	2	2	1	4	1	5	1	1	1	3	1	0	0	1	2	2	1	6	1	6	3	3	2	0	4	4	1	3	7.01	3	2	2	2	3	0	0	2	1	4
ARID2__chr12	2	0	2	2	0	4	1	1	4	0	1	5	2	2	3	3	0	2	3	3	2	0	4	1	1	3	4	2	1	0	2	4	5	1	4	3	4	3	3	7.01	0	6	1	7.01	0	0	0	2	1
ARID3A__chr19	0	0	0	0	0	0	1	0	0	0	0	0	0	0	0	0	0	0	0	0	0	0	0	0	0	0	0	1	0	1	0	0	0	1	0	1	0	0	0	0	0	1	0	0	0	0	0	0	0
ARID3B__chr15	0	0	0	0	0	0	1	0	0	0	0	0	1	0	0	0	0	2	1	0	0	0	0	0	0	0	0	0	0	0	1	2	1	0	1	0	0	0	2	2	0	0	0	2	0	0	0	1	0
ARID4A__chr14	2	0	4	0	0	0	3	0	1	0	2	1	0	0	0	0	0	0	1	1	0	1	0	0	0	0	1	0	0	0	0	1	3	0	1	0	2	0	5	0	0	2	0	2	0	0	7.01	0	0
ARID4B__chr1	2	0	2	2	0	6	10.01	4	5	0	4	4	1	0	4	1	0	0	1	0	1	0	3	3	0	4	2	2	1	3	8.01	5	2	1	7.01	4	5	5	4	9.01	1	4	0	5	0	0	1	0	1
ARID5A__chr2	1	0	0	0	0	0	2	1	0	0	2	1	1	0	0	0	0	1	0	0	0	0	0	0	1	0	2	0	0	1	0	0	1	0	1	0	1	0	2	3	0	0	0	2	0	0	0	1	1
ARID5B__chr10	0	2	3	0	0	2	0	0	3	0	0	7.01	0	0	4	1	0	1	8.01	1	0	0	0	0	3	2	3	2	3	12.02	4	4	2	1	4	1	6	2	0	3	1	0	0	6	0	0	3	3	7.01
ARIH1__chr15	1	0	2	2	0	3	2	0	1	0	1	6	0	0	2	4	0	4	3	1	1	0	3	0	0	2	7.01	3	1	5	6	6	2	1	2	3	3	2	4	5	3	4	0	2	0	0	3	1	1
ARIH2OS__chr3	0	0	0	0	0	0	0	0	0	0	0	0	0	0	0	0	0	0	0	0	0	0	0	0	0	0	0	0	0	0	0	0	0	0	0	0	0	0	0	0	0	0	0	0	0	0	0	0	0
ARIH2__chr3	2	1	1	1	0	0	4	2	3	0	1	6	1	6	3	4	0	6	2	2	0	1	5	1	3	0	4	8.01	1	5	9.01	2	4	1	2	4	3	3	2	6	2	2	5	3	0	0	1	4	4
ARL11__chr13	0	0	0	0	0	0	0	0	0	0	1	0	0	0	0	0	0	0	0	0	0	0	0	0	0	0	0	0	0	0	0	0	0	0	0	0	0	0	0	0	0	0	0	0	0	0	0	0	0
ARL13B__chr3	0	0	0	0	0	0	0	0	2	0	0	0	1	0	0	1	0	2	0	0	0	0	0	0	1	0	0	0	0	1	3	3	3	1	0	1	0	0	2	2	0	1	0	0	0	0	0	2	1
ARL14EPL__chr5	0	0	0	0	0	0	0	0	0	0	0	0	0	0	0	0	0	0	0	0	0	0	0	0	0	0	0	0	0	0	0	0	0	0	0	0	0	0	0	0	0	0	0	0	0	0	0	0	0
ARL14EP__chr11	0	0	3	2	0	0	1	0	1	0	0	1	0	0	0	0	0	0	0	0	0	0	0	0	0	0	0	0	0	1	0	1	0	0	2	1	0	0	0	1	0	0	0	2	0	0	0	0	0
ARL14__chr3	0	0	0	0	0	0	0	0	0	0	1	0	0	0	0	0	0	0	0	0	0	0	0	0	0	0	0	0	0	0	0	0	0	0	0	0	0	0	0	0	0	0	0	0	0	0	0	0	0
ARL15__chr5	0	0	0	0	0	0	0	0	0	0	0	0	0	0	0	0	0	0	0	0	0	0	0	0	0	0	0	0	0	0	0	0	0	0	0	0	0	0	0	0	0	0	0	0	0	0	1	0	0
ARL16__chr17	0	0	0	0	0	3	1	0	1	0	5	0	0	2	3	0	0	1	1	0	0	0	3	0	0	0	1	0	0	2	6	5	1	1	3	1	0	1	4	3	2	4	3	6	0	0	3	1	1
ARL17A__chr17	0	0	0	0	0	0	0	0	0	0	0	0	0	0	0	0	0	0	0	0	0	0	0	0	0	0	0	0	0	0	0	0	0	0	0	0	0	0	0	0	0	0	0	0	0	0	0	0	0
ARL1__chr12	1	2	2	1	0	3	6	5	3	0	1	14.02	1	3	5	1	1	1	6	0	1	0	7.01	0	2	7.01	7.01	8.01	2	10.01	5	7.01	7.01	2	2	5	7.01	4	10.01	4	3	2	3	9.01	1	0	5	1	4
ARL2BP__chr16	1	2	3	2	0	4	3	0	5	0	4	16.03	2	3	6	5	0	4	7.01	1	0	0	4	0	5	9.01	3	3	1	14.02	6	10.01	5	8.01	4	3	5	0	12.02	6	3	9.01	4	7.01	0	0	5	4	5
ARL2__chr11	1	2	3	0	0	4	1	3	3	0	2	5	2	4	4	5	0	0	9.01	2	1	0	2	1	4	4	8.01	0	0	6	4	14.02	5	2	5	0	3	4	6	4	4	4	1	8.01	0	0	3	6	3
ARL3__chr10	2	6	7.01	5	0	3	5	0	2	0	0	16.03	5	5	11.01	4	0	5	4	6	1	0	1	1	6	8.01	8.01	9.01	4	17.03	10.01	10.01	14.02	5	8.01	9.01	12.02	4	8.01	5	7.01	6	11.01	11.01	0	1	5	6	7.01
ARL4A__chr7	3	1	2	0	0	2	1	0	0	0	1	3	1	1	3	1	0	2	0	4	0	0	0	1	0	1	0	4	1	1	1	1	2	0	9.01	2	1	1	6	3	0	3	1	2	0	0	2	2	1
ARL4C__chr2	8.01	11.01	3	4	0	6	12.02	4	11.01	1	1	28.09	2	8.01	31.11	9.01	1	19.04	22.06	9.01	4	0	13.02	0	4	20.05	15.03	10.01	11.01	37.16	29.1	7.01	12.02	3	51.31	1	29.1	19.04	22.06	15.03	9.01	12.02	10.01	33.13	0	0	11.01	6	13.02
ARL4D__chr17	0	0	0	0	0	0	1	0	0	0	1	2	0	0	0	1	0	0	0	1	0	0	1	1	0	0	2	0	1	2	4	1	3	0	4	3	2	1	2	1	1	4	0	1	0	0	0	0	0
ARL5A__chr2	1	1	3	1	0	3	1	3	4	1	1	6	3	9.01	6	4	0	4	5	4	3	0	3	2	3	0	5	6	3	8.01	5	5	8.01	6	7.01	7.01	4	5	6	4	3	6	4	8.01	0	0	3	2	6
ARL5B__chr10	0	0	0	0	0	0	1	0	0	0	0	0	0	0	0	0	0	0	0	0	0	0	0	0	0	1	0	0	0	0	2	0	0	1	0	1	0	4	0	0	0	0	1	0	0	0	0	0	0
ARL6IP1__chr16	47.27	45.24	53.34	24.07	1	55.37	2	24.07	53.34	0	49.29	35.15	33.13	5	8.01	38.17	0	5	13.02	23.06	17.03	2	44.23	21.05	8.01	3	12.02	21.05	3	39.18	69.58	92.01	82.82	23.06	57.39	20.05	43.22	44.23	77.72	46.25	41.2	84.86	22.06	88.95	1	0	33.13	39.18	23.06
ARL6IP4__chr12	5	2	7.01	3	0	2	9.01	3	5	0	5	12.02	6	4	9.01	8.01	0	4	5	4	0	2	0	2	9.01	10.01	8.01	4	5	19.04	10.01	14.02	12.02	2	14.02	7.01	6	2	12.02	12.02	7.01	7.01	9.01	10.01	0	0	6	4	9.01
ARL6IP5__chr3	1	6	10.01	4	0	7.01	5	2	4	0	3	22.06	4	9.01	10.01	7.01	1	4	6	1	2	2	2	2	9.01	9.01	11.01	11.01	4	17.03	10.01	9.01	8.01	4	21.05	8.01	7.01	16.03	19.04	15.03	4	12.02	14.02	10.01	2	0	3	6	5
ARL6IP6__chr2	0	0	0	2	0	0	2	0	1	0	2	1	0	2	4	0	0	0	0	0	0	0	0	0	3	0	0	3	1	6	5	1	2	0	1	1	0	0	1	1	0	0	1	0	0	0	2	0	0
ARL6__chr3	0	0	0	0	0	0	0	0	0	0	0	0	0	0	0	0	0	0	0	0	0	0	0	0	1	0	0	0	0	0	0	0	0	0	0	0	1	0	0	1	0	2	0	0	0	0	0	0	0
ARL8A__chr1	0	1	0	1	0	0	2	0	2	0	1	1	2	0	1	0	0	0	0	1	0	0	0	0	0	0	3	1	0	6	4	2	4	0	3	0	1	1	1	4	0	3	2	0	0	0	0	4	1
ARL8B__chr3	2	7.01	8.01	5	0	7.01	12.02	2	7.01	1	3	12.02	2	4	3	3	1	6	2	5	1	1	1	2	5	5	2	5	3	11.01	7.01	11.01	10.01	0	9.01	7.01	7.01	2	7.01	7.01	8.01	10.01	6	14.02	0	1	9.01	3	4
ARL9__chr4	0	0	0	0	0	0	0	0	0	0	0	0	0	0	0	0	0	0	0	0	0	0	0	0	0	0	0	0	0	0	0	0	0	0	0	0	0	0	0	0	0	0	0	0	0	0	0	0	0
ARMC10__chr7	1	3	2	3	0	1	4	1	2	0	1	3	1	2	2	2	0	0	0	0	0	0	1	1	2	0	3	3	3	7.01	2	2	1	1	1	4	3	2	3	3	1	4	1	8.01	0	0	1	1	3
ARMC12__chr6	0	0	0	0	0	0	0	0	0	0	0	0	0	0	0	0	0	0	0	0	0	0	0	0	0	0	0	0	0	0	0	0	0	0	0	0	0	0	0	0	0	0	0	0	0	0	0	0	0
ARMC1__chr8	0	0	5	2	0	3	2	1	2	0	4	5	0	2	1	3	0	5	2	1	2	2	5	2	8.01	0	1	2	3	9.01	6	8.01	4	4	9.01	13.02	4	2	13.02	2	5	4	2	6	1	0	4	3	3
ARMC2__chr6	0	0	1	0	0	0	0	0	0	0	0	1	0	0	0	0	0	0	0	0	0	0	0	0	0	0	0	0	0	1	0	0	0	0	0	0	0	0	1	0	0	0	0	0	0	0	0	0	0
ARMC4__chr10	0	0	0	0	0	0	0	0	0	0	0	0	0	0	0	0	0	0	0	0	0	0	0	0	1	0	0	1	0	0	0	0	0	0	0	0	0	0	0	2	0	0	0	1	0	0	0	1	0
ARMC5__chr16	0	0	1	0	0	1	0	0	2	0	0	0	0	0	0	1	0	0	3	0	0	0	0	0	0	1	0	0	1	0	0	2	3	0	2	1	1	2	1	1	0	2	0	2	0	0	0	0	0
ARMC6__chr19	1	1	1	0	0	2	0	0	2	0	1	2	0	1	2	2	0	1	0	3	0	0	2	0	1	0	1	0	0	1	2	6	9.01	2	0	0	2	3	2	0	1	4	1	8.01	0	0	2	2	1
ARMC7__chr17	0	2	0	0	0	0	0	0	1	0	0	0	0	0	0	0	0	1	0	0	0	0	0	0	0	0	0	0	1	2	0	0	0	0	0	0	1	0	1	0	1	0	0	0	0	0	0	0	0
ARMC8__chr3	1	1	1	0	0	1	2	0	2	0	1	5	1	1	1	0	0	0	0	3	1	0	3	3	0	1	1	2	1	6	4	6	1	0	5	2	0	0	1	5	3	0	0	5	0	0	2	2	3
ARMC9__chr2	1	0	0	1	0	1	0	0	0	0	0	0	0	0	1	1	0	0	0	0	1	0	0	0	0	2	0	1	0	0	3	0	1	0	1	0	0	0	2	0	0	1	1	1	0	0	0	0	0
ARMCX1__chrX	1	2	2	0	0	0	1	2	0	0	0	4	1	0	1	0	0	1	1	0	0	1	0	1	0	0	2	0	0	0	1	0	5	2	4	0	0	0	0	0	0	1	0	3	0	0	0	0	0
ARMCX2__chrX	0	2	2	2	0	0	3	1	3	0	0	20.05	0	3	7.01	2	0	0	0	0	0	0	2	0	0	3	2	2	2	10.01	0	0	1	1	5	4	0	1	4	0	3	2	1	2	0	0	2	2	6
ARMCX3__chrX	1	1	0	0	0	0	1	1	0	0	2	4	0	0	1	3	0	0	1	0	3	0	3	1	2	0	1	0	0	1	1	1	2	0	5	0	1	2	1	1	1	0	1	0	0	0	1	2	3
ARMCX4__chrX	0	0	0	0	0	0	0	0	0	0	0	0	0	0	0	0	0	0	0	0	0	0	0	0	0	0	0	0	0	0	0	0	0	0	0	0	0	0	0	0	0	0	0	0	0	0	0	0	0
ARMCX5-GPRASP2__chrX	0	0	0	0	0	0	0	0	0	0	0	0	0	0	0	0	0	0	0	0	0	0	0	0	0	0	0	0	0	1	0	0	0	0	0	0	0	0	0	0	0	0	0	0	0	0	0	0	0
ARMCX5__chrX	0	0	0	0	0	3	1	0	1	0	0	1	0	1	0	0	0	0	0	1	0	1	0	0	1	0	0	0	0	2	4	0	1	0	0	0	0	1	0	0	0	0	2	0	0	1	1	0	0
ARMCX6__chrX	1	0	0	0	0	1	3	0	1	0	1	3	1	4	1	0	0	0	3	1	0	0	1	0	2	0	0	4	3	2	3	2	3	0	1	0	0	0	1	3	2	5	2	1	0	0	3	1	3
ARMS2__chr10	0	0	0	0	0	0	0	0	0	0	0	0	0	0	0	0	0	0	0	0	0	0	0	0	0	0	0	0	0	0	0	0	0	0	0	0	0	0	0	0	0	0	0	0	0	0	0	1	0
ARNT2__chr15	0	1	0	0	0	2	1	0	1	0	0	1	2	2	2	0	0	1	0	1	0	0	2	0	1	0	2	4	0	5	1	1	2	1	0	1	1	2	7.01	3	1	0	0	1	0	0	1	1	0
ARNTL2__chr12	3	4	7.01	1	0	8.01	5	1	7.01	0	1	4	2	2	10.01	2	0	2	1	2	2	0	2	1	8.01	4	0	3	3	13.02	8.01	4	8.01	1	4	5	7.01	2	9.01	7.01	3	3	5	2	0	0	4	1	7.01
ARNTL__chr11	0	0	0	0	0	1	1	1	1	0	0	0	0	1	1	0	0	0	0	1	0	0	0	0	0	0	0	0	0	1	4	0	1	0	3	1	1	0	0	4	0	1	0	3	0	0	0	2	0
ARNT__chr1	0	1	1	0	0	0	1	1	0	0	1	0	2	0	0	0	0	0	3	0	0	0	0	0	0	0	1	0	0	3	0	2	0	1	2	0	2	0	1	0	0	0	1	2	0	0	0	1	0
ARPC1A__chr7	4	5	10.01	6	0	15.03	9.01	9.01	18.04	0	8.01	47.27	10.01	14.02	20.05	12.02	0	10.01	14.02	6	3	1	11.01	4	18.04	14.02	19.04	21.05	13.02	32.12	25.07	30.11	12.02	11.01	22.06	7.01	16.03	6	19.04	21.05	7.01	15.03	11.01	22.06	0	0	11.01	13.02	19.04
ARPC1B__chr7	1	12.02	7.01	3	2	4	11.01	1	2	0	11.01	15.03	7.01	8.01	12.02	13.02	0	14.02	19.04	4	0	3	9.01	4	9.01	11.01	11.01	5	5	16.03	20.05	22.06	7.01	0	8.01	19.04	12.02	13.02	20.05	20.05	4	14.02	16.03	17.03	0	1	3	5	16.03
ARPC2__chr2	27.09	31.11	39.18	19.04	1	30.11	52.33	25.07	46.25	1	31.11	70.6	21.05	43.22	54.35	56.38	0	31.11	35.15	21.05	19.04	6	27.09	14.02	40.19	43.22	54.35	57.39	51.31	95.08	82.82	63.48	71.61	21.05	68.56	50.3	57.39	40.19	92.01	93.04	33.13	61.45	48.28	61.45	4	2	40.19	46.25	63.48
ARPC3__chr12	12.02	4	9.01	6	0	12.02	22.06	8.01	13.02	0	13.02	36.15	4	18.04	24.07	13.02	1	15.03	14.02	7.01	6	3	11.01	6	25.07	15.03	24.07	17.03	13.02	56.38	32.12	33.13	32.12	7.01	24.07	19.04	32.12	17.03	42.21	22.06	22.06	28.09	27.09	22.06	3	0	20.05	12.02	31.11
ARPC4__chr3	5	5	4	1	0	2	4	4	6	0	3	13.02	4	7.01	11.01	6	1	6	9.01	5	0	0	3	2	6	9.01	8.01	2	9.01	35.15	11.01	18.04	18.04	2	13.02	3	8.01	9.01	12.02	7.01	2	9.01	6	8.01	1	0	4	8.01	25.07
ARPC5L__chr9	2	5	3	1	0	3	3	1	4	0	1	4	2	2	6	3	0	2	0	4	0	0	5	2	0	0	3	3	1	6	4	11.01	5	0	2	2	5	3	1	2	2	4	6	9.01	0	1	1	5	3
ARPC5__chr1	10.01	14.02	22.06	12.02	0	17.03	12.02	8.01	20.05	0	17.03	43.22	9.01	18.04	10.01	16.03	1	17.03	18.04	9.01	5	5	14.02	7.01	29.1	5	28.09	13.02	18.04	48.28	25.07	39.18	25.07	8.01	22.06	26.08	33.13	22.06	48.28	30.11	21.05	31.11	22.06	21.05	1	0	19.04	21.05	24.07
ARPP19__chr15	13.02	6	4	6	0	10.01	12.02	3	7.01	0	8.01	34.14	7.01	8.01	10.01	10.01	1	7.01	3	4	1	3	1	9.01	7.01	4	5	13.02	9.01	35.15	23.06	19.04	17.03	4	17.03	12.02	18.04	11.01	20.05	15.03	11.01	12.02	11.01	17.03	0	1	12.02	7.01	14.02
ARPP21__chr3	0	0	0	0	0	0	0	0	0	0	0	0	0	0	0	0	0	0	0	0	0	0	0	0	0	0	0	0	0	0	0	0	0	0	0	0	0	0	0	0	0	0	0	0	0	0	0	0	0
ARRB1__chr11	0	0	0	0	0	0	0	0	0	0	0	0	0	0	0	0	0	0	0	0	0	0	0	0	0	0	0	0	0	0	0	0	0	0	0	0	0	0	0	0	0	0	0	0	0	0	0	0	0
ARRB2__chr17	1	0	1	0	0	0	0	0	2	0	0	0	0	0	1	0	0	0	1	0	0	0	0	1	3	0	3	1	0	2	5	1	4	0	2	0	1	2	0	1	0	1	4	1	0	2	2	0	1
ARRDC1__chr9	2	0	0	0	0	0	2	0	2	0	0	1	0	0	4	0	0	0	0	0	0	0	0	0	1	1	1	2	1	3	0	3	3	0	0	2	1	1	3	3	0	1	0	0	0	0	0	0	0
ARRDC2__chr19	0	0	2	0	0	2	0	0	0	0	0	0	0	0	1	0	0	1	0	0	0	0	1	0	0	0	0	0	0	0	1	0	2	0	0	0	0	0	0	0	0	0	0	1	0	0	0	0	2
ARRDC3-AS1__chr5	0	0	0	0	0	0	0	0	0	0	0	0	0	1	0	0	0	0	0	0	0	0	0	0	0	0	0	1	0	0	2	0	0	0	1	0	0	0	1	1	0	0	0	1	0	0	0	0	0
ARRDC3__chr5	0	0	0	0	0	0	0	1	0	0	0	5	0	0	2	0	0	2	0	0	1	0	0	0	2	5	1	0	3	1	0	1	0	1	0	0	2	3	0	1	0	0	0	5	0	0	1	0	2
ARRDC4__chr15	0	0	0	0	0	0	0	0	0	0	0	1	0	0	0	0	0	0	0	0	0	0	1	0	0	0	0	0	0	0	0	0	2	0	0	0	0	0	0	0	0	0	0	0	0	0	0	0	0
ARRDC5__chr19	0	0	0	0	0	0	0	0	0	0	0	0	0	0	0	0	0	0	0	0	0	0	0	0	0	0	0	0	0	0	0	0	0	0	0	0	0	0	0	0	0	0	0	0	0	0	0	0	0
ARSA__chr22	0	0	0	0	0	0	0	0	1	0	0	0	0	0	0	0	0	0	0	0	0	0	0	0	1	0	0	1	0	0	0	0	0	0	0	0	0	0	0	0	0	0	0	1	0	0	0	0	0
ARSB__chr5	0	1	0	0	0	0	0	0	1	0	0	1	0	0	1	3	0	2	0	0	0	0	0	0	0	2	0	0	0	3	0	0	0	1	2	0	3	0	3	1	0	2	1	2	0	0	1	2	1
ARSD__chrX	0	0	0	0	0	0	0	1	0	0	0	1	0	1	0	2	0	0	0	1	0	0	0	0	0	0	0	0	0	0	0	0	0	0	0	0	0	0	0	0	0	2	0	2	0	0	0	0	0
ARSE__chrX	0	0	0	0	0	0	0	0	0	0	0	1	0	0	0	0	0	0	0	0	0	0	0	0	0	0	0	0	1	0	0	0	0	0	0	0	0	0	0	0	0	0	0	0	0	0	0	0	0
ARSG__chr17	0	0	0	0	0	0	0	0	0	0	0	1	1	0	0	0	0	0	0	0	0	0	0	0	0	0	0	0	0	1	0	0	0	0	0	0	0	0	0	0	0	0	0	0	0	0	0	0	0
ARSI__chr5	0	0	0	0	0	0	0	1	0	0	0	0	0	1	1	0	0	0	0	0	0	0	1	0	0	0	2	0	0	1	0	0	0	0	0	0	0	0	0	0	0	0	1	0	0	0	0	0	0
ARSJ__chr4	1	1	6	1	0	4	1	2	3	0	1	4	1	1	2	2	0	2	0	0	0	0	1	0	6	0	2	0	1	0	0	5	3	3	4	2	1	1	5	4	1	5	0	2	0	0	3	5	1
ARSK__chr5	0	2	0	0	0	0	1	0	2	0	0	0	1	0	0	1	0	2	1	0	1	0	0	1	0	0	0	2	0	0	1	0	0	0	1	2	0	0	0	0	1	0	2	1	0	0	1	0	0
ARTN__chr1	0	0	0	0	0	1	0	0	0	0	0	0	0	0	0	0	0	0	0	0	0	0	0	1	1	0	0	0	0	0	0	0	0	0	0	0	0	0	1	1	0	0	0	0	0	0	0	0	0
ARV1__chr1	1	0	0	1	0	3	2	0	3	1	1	3	0	0	3	0	0	2	0	0	0	0	1	1	1	0	2	2	1	2	3	0	3	2	1	1	2	1	3	4	1	4	2	1	0	0	2	0	0
ARVCF__chr22	0	0	0	0	0	0	0	0	0	0	0	0	0	0	0	0	0	0	0	0	0	0	0	0	0	0	0	0	0	0	1	0	0	0	0	0	0	0	1	0	0	1	0	0	0	0	0	0	0
ARX__chrX	0	0	0	0	0	0	0	0	0	0	0	0	0	0	0	0	0	0	0	0	0	0	0	0	0	0	0	0	0	0	0	0	0	0	0	0	0	0	0	0	0	0	0	0	0	0	0	0	0
AR__chrX	0	0	0	0	0	0	0	0	0	0	0	0	0	0	0	0	0	0	0	0	0	0	0	0	0	0	0	0	0	0	0	0	0	0	0	0	0	0	0	0	0	0	0	0	0	0	0	0	0
ASAH1__chr8	0	0	3	0	0	2	1	0	1	0	1	9.01	0	0	3	0	0	0	2	2	1	0	1	0	1	1	1	4	3	4	0	0	0	3	2	2	1	3	5	2	2	4	1	1	0	0	1	0	0
ASAP1-IT1__chr8	0	0	0	0	0	0	0	0	0	0	0	0	0	0	0	1	0	1	0	0	0	0	0	0	0	0	0	0	0	0	0	0	0	1	0	0	0	0	0	0	0	0	0	0	0	0	0	0	0
ASAP1__chr8	1	8.01	5	2	0	5	7.01	4	5	0	5	20.05	2	10.01	14.02	6	0	10.01	2	4	2	2	5	4	5	6	5	13.02	3	23.06	15.03	6	6	7.01	10.01	11.01	5	6	14.02	9.01	2	12.02	9.01	18.04	0	0	8.01	5	14.02
ASAP2__chr2	3	1	4	4	0	4	0	0	8.01	0	2	11.01	3	2	5	7.01	0	0	4	2	0	0	6	2	7.01	0	6	5	3	10.01	13.02	10.01	6	4	11.01	10.01	8.01	2	8.01	9.01	5	7.01	7.01	4	0	0	4	1	11.01
ASAP3__chr1	0	0	0	0	0	0	0	0	0	0	0	0	0	0	0	0	0	0	0	0	0	0	0	0	0	0	0	0	0	0	0	0	0	0	0	0	0	0	0	0	0	0	0	0	0	0	0	0	0
ASB11__chrX	0	0	0	0	0	0	0	0	0	0	0	0	0	0	0	0	0	0	0	0	0	0	0	0	0	0	0	0	0	0	0	0	0	0	0	0	0	0	0	0	0	0	0	0	0	0	0	0	0
ASB13__chr10	1	0	0	0	0	0	0	0	0	0	1	0	0	0	0	0	0	0	0	0	0	0	0	0	0	0	1	1	0	0	0	1	1	0	0	0	0	0	0	0	0	0	0	1	0	0	0	0	0
ASB14__chr3	0	0	0	0	0	0	0	0	0	0	0	0	0	0	0	0	0	0	0	0	0	0	0	0	0	0	0	0	0	0	0	0	0	0	0	0	0	0	0	0	0	0	0	0	0	0	0	0	0
ASB15__chr7	0	0	0	0	0	0	0	0	0	0	0	0	0	0	0	0	0	0	0	0	0	0	0	0	0	0	0	0	0	0	0	0	0	0	0	0	0	0	0	0	0	0	0	0	0	0	0	0	0
ASB16-AS1__chr17	0	0	0	0	0	0	1	0	0	0	0	1	0	0	0	0	0	1	0	0	0	0	0	0	1	0	0	0	0	2	1	0	1	0	0	1	0	0	1	2	0	1	2	0	0	0	0	0	0
ASB1__chr2	0	3	1	0	0	2	2	0	1	0	2	5	3	3	5	1	0	1	4	1	0	0	0	2	3	1	6	1	1	6	3	2	4	0	3	3	7.01	2	4	3	1	3	1	5	0	0	0	9.01	1
ASB3__chr2	0	0	1	0	0	0	0	0	0	0	1	0	0	0	0	0	0	0	0	0	0	0	0	0	1	0	0	0	0	1	0	1	1	0	0	0	0	1	0	0	2	0	1	0	0	0	0	0	0
ASB4__chr7	0	0	0	0	0	2	0	0	0	0	0	0	0	0	3	0	0	0	0	0	0	0	0	0	0	0	0	0	0	0	0	0	0	0	0	0	0	0	0	0	0	0	0	2	0	0	0	0	0
ASB5__chr4	0	0	0	0	0	0	0	0	0	0	0	0	0	0	0	0	0	0	0	0	0	0	0	0	0	0	0	0	0	0	0	0	0	0	0	0	0	0	0	0	0	0	0	0	0	0	0	0	0
ASB6__chr9	0	0	0	1	0	0	1	0	0	0	0	2	1	0	1	1	0	1	0	1	0	0	0	0	1	0	2	0	0	0	0	0	2	0	2	0	1	0	2	1	2	0	0	3	0	0	0	0	2
ASB7__chr15	0	0	1	0	0	1	0	0	1	0	0	1	0	0	0	1	0	1	1	1	0	0	0	0	3	0	0	2	0	2	2	2	1	0	2	0	0	0	2	1	0	1	0	3	0	0	1	0	1
ASB8__chr12	0	6	0	0	0	0	0	0	1	1	1	4	1	1	0	3	0	4	3	0	0	0	0	0	2	1	3	2	1	6	5	6	4	1	1	2	1	0	5	1	2	1	4	4	0	0	0	2	1
ASB9__chrX	0	0	0	0	0	0	0	0	0	0	0	0	0	0	0	0	0	0	0	0	0	0	0	0	0	0	0	0	0	0	0	0	0	0	0	0	0	0	0	0	0	0	0	0	0	0	0	0	0
ASCC1__chr10	2	2	0	0	0	4	0	0	1	0	2	0	1	0	5	4	0	2	4	0	1	0	1	2	1	2	1	2	2	4	4	4	4	1	5	3	1	3	4	2	2	1	2	8.01	0	0	1	0	0
ASCC2__chr22	0	0	1	0	0	1	1	2	5	0	0	4	1	2	3	1	0	2	3	3	0	0	2	0	0	2	1	2	0	4	3	3	3	1	5	1	3	0	3	2	0	1	1	7.01	0	0	2	2	1
ASCC3__chr6	1	3	0	0	0	0	4	0	4	0	2	7.01	2	2	3	1	0	0	1	2	0	0	3	0	1	2	2	2	2	6	3	4	3	1	10.01	2	1	3	7.01	3	0	7.01	2	5	0	0	0	1	7.01
ASF1A__chr6	3	0	10.01	5	0	5	5	2	3	0	4	2	1	2	3	3	0	1	2	3	0	0	2	0	5	2	1	2	0	7.01	10.01	5	6	3	10.01	4	6	2	8.01	6	10.01	2	5	9.01	0	0	2	2	4
ASF1B__chr19	5	3	10.01	4	0	3	3	2	4	0	4	10.01	1	7.01	5	7.01	0	4	4	3	0	1	2	4	11.01	0	0	5	6	18.04	13.02	7.01	8.01	2	13.02	5	3	7.01	14.02	16.03	5	16.03	9.01	10.01	0	0	1	3	6
ASGR1__chr17	0	0	0	0	0	0	0	0	0	0	0	0	0	0	0	0	0	0	0	0	0	0	0	0	0	0	0	0	0	0	0	0	0	0	0	0	0	0	0	0	0	0	0	0	0	0	0	0	0
ASH1L-AS1__chr1	0	0	0	0	0	0	0	0	0	0	0	0	0	0	0	0	0	0	0	0	0	0	0	0	0	0	0	0	0	0	0	0	0	0	0	0	0	0	0	0	0	0	0	0	0	0	0	0	0
ASH1L__chr1	1	3	1	0	0	4	3	1	5	0	2	5	0	0	8.01	1	0	2	2	3	0	1	5	0	3	0	0	1	0	1	2	3	7.01	3	5	3	5	5	6	1	1	3	1	2	0	0	3	0	0
ASH2L__chr8	1	0	4	2	0	4	4	0	4	0	3	7.01	1	1	2	5	0	3	2	1	0	0	0	1	2	3	1	5	1	7.01	6	3	2	0	5	7.01	5	2	5	4	2	5	1	6	0	0	4	2	1
ASIC1__chr12	0	0	0	0	0	0	1	0	0	0	0	0	0	0	0	0	0	0	0	0	0	0	0	0	0	0	0	0	0	1	0	0	0	0	0	0	0	0	0	1	0	0	0	0	0	0	0	0	0
ASIC3__chr7	0	0	0	0	0	1	0	0	0	0	0	0	0	0	0	0	0	0	0	0	0	0	0	0	0	0	0	0	0	0	0	1	0	0	0	0	0	0	0	0	0	0	0	1	0	0	0	0	0
ASIP__chr20	0	0	0	0	0	0	0	0	0	0	0	0	0	0	0	0	0	0	0	0	0	0	0	0	0	0	0	0	0	0	0	0	0	0	0	0	0	0	0	0	0	0	0	0	0	0	0	0	0
ASL__chr7	0	0	0	1	0	1	1	0	3	0	0	3	0	2	1	0	0	0	1	0	0	0	0	0	1	0	0	0	3	0	1	4	3	0	1	0	1	0	3	2	0	1	3	2	0	0	0	0	1
ASNA1__chr19	1	3	6	0	0	3	2	0	7.01	0	4	8.01	1	4	10.01	4	0	2	12.02	0	1	0	4	1	4	2	9.01	1	3	7.01	10.01	10.01	11.01	4	9.01	8.01	7.01	8.01	7.01	7.01	4	7.01	3	15.03	0	0	0	9.01	5
ASNSD1__chr2	0	0	1	1	0	2	2	1	0	0	0	5	2	0	4	0	0	0	2	0	1	0	1	1	0	0	1	2	3	1	2	3	0	0	2	1	1	2	5	2	0	4	1	4	0	0	1	2	1
ASNS__chr7	1	2	0	0	0	3	1	1	3	0	0	0	0	0	0	3	0	2	1	2	0	0	1	0	0	1	1	3	1	1	2	1	2	0	4	0	2	6	4	0	5	2	4	1	0	0	3	0	0
ASPHD1__chr16	1	0	0	0	0	0	0	0	0	0	0	1	0	0	0	0	0	1	1	0	0	0	0	0	0	0	0	0	0	0	1	1	0	0	0	0	0	0	1	2	0	1	0	0	0	0	0	0	0
ASPHD2__chr22	0	0	0	0	0	1	0	0	0	0	0	0	0	0	0	0	0	0	0	0	0	0	0	0	0	1	0	0	0	1	0	0	2	0	0	0	0	0	0	0	0	1	0	0	0	0	0	0	0
ASPH__chr8	13.02	11.01	18.04	4	0	18.04	21.05	11.01	17.03	0	15.03	43.22	9.01	17.03	42.21	17.03	0	8.01	12.02	15.03	8.01	2	10.01	3	32.12	18.04	44.23	29.1	18.04	67.55	26.08	28.09	18.04	14.02	35.15	10.01	24.07	15.03	68.56	35.15	24.07	28.09	19.04	31.11	1	0	20.05	8.01	23.06
ASPM__chr1	10.01	10.01	22.06	13.02	0	15.03	5	19.04	46.25	1	19.04	8.01	19.04	4	4	24.07	0	5	1	7.01	10.01	3	36.15	9.01	3	0	0	10.01	2	4	57.39	39.18	42.21	8.01	71.61	20.05	32.12	40.19	40.19	45.24	13.02	58.41	5	57.39	0	1	16.03	8.01	13.02
ASPSCR1__chr17	0	0	0	0	0	0	1	0	1	0	1	1	0	0	1	1	0	0	0	0	0	0	1	0	0	1	0	0	0	1	2	1	2	0	1	0	0	0	0	0	0	1	0	2	0	0	0	0	0
ASRGL1__chr11	0	0	2	0	0	0	1	0	1	0	1	0	0	0	1	0	0	1	1	0	0	0	0	0	0	0	0	0	0	3	1	2	0	0	0	0	1	0	0	0	0	1	1	0	0	0	1	0	1
ASS1__chr9	0	0	0	0	0	0	0	0	0	0	0	0	0	0	0	0	0	0	0	0	0	0	0	0	0	0	0	0	0	0	0	0	0	0	0	0	0	0	0	1	0	0	0	0	0	0	0	0	0
ASTE1__chr3	0	0	0	0	0	0	1	0	0	0	0	0	0	1	0	0	0	0	0	0	0	0	0	0	0	0	0	0	0	1	0	0	0	0	1	0	0	1	0	0	1	0	0	0	0	0	0	0	0
ASTN1__chr1	0	0	0	0	0	0	0	0	0	0	0	0	0	0	0	0	0	0	0	0	0	0	0	0	0	0	0	0	0	0	0	0	0	0	0	0	0	0	0	0	0	0	0	0	0	0	0	0	0
ASTN2__chr9	0	0	1	0	0	0	0	0	0	0	1	0	0	2	2	2	0	1	3	0	0	0	0	0	1	0	0	0	0	0	1	1	1	2	0	1	1	0	1	4	0	0	1	0	0	0	1	0	0
ASUN__chr12	2	2	2	1	0	0	3	1	1	0	1	5	1	1	6	2	0	3	2	3	1	0	1	0	2	2	6	5	2	4	0	4	4	4	5	2	7.01	3	5	4	4	4	4	4	0	0	2	1	3
ASXL1__chr20	1	4	7.01	1	0	4	6	2	5	0	3	1	5	1	3	3	0	5	0	1	0	0	4	0	3	2	2	0	4	1	7.01	9.01	8.01	0	6	2	3	4	7.01	6	1	3	2	5	0	0	2	3	2
ASXL2__chr2	2	3	0	1	0	1	0	0	1	0	0	0	1	2	2	1	0	4	2	0	0	0	2	0	2	1	0	0	0	1	0	2	1	1	1	1	5	0	2	1	3	2	1	3	0	0	2	0	1
ASZ1__chr7	0	0	0	0	0	0	0	0	0	0	2	0	0	0	0	0	0	0	0	0	0	0	0	0	0	0	0	0	0	0	0	0	0	0	0	0	0	0	0	0	0	0	0	0	0	0	0	0	0
ATAD1__chr10	2	2	5	2	0	0	2	0	2	0	0	5	0	1	2	5	0	0	3	1	0	0	0	0	0	1	4	4	0	4	6	0	3	1	0	0	1	1	4	3	1	3	3	4	0	0	1	1	1
ATAD2B__chr2	1	0	0	1	0	0	0	1	0	0	0	0	0	0	0	0	0	1	1	0	0	0	0	1	0	2	0	0	0	1	1	1	0	0	1	0	0	0	0	0	0	0	0	0	0	0	0	0	0
ATAD2__chr8	0	2	5	1	0	1	2	2	0	0	7.01	8.01	2	8.01	15.03	1	0	3	1	2	0	1	0	2	10.01	0	1	3	5	11.01	3	2	1	3	3	4	6	2	3	4	3	2	3	7.01	0	0	2	0	0
ATAD3A__chr1	0	1	0	0	0	1	0	0	0	0	2	1	1	0	0	0	0	0	0	0	0	0	1	0	0	0	0	0	0	1	2	1	0	0	0	3	1	0	4	2	0	3	0	4	0	0	0	2	3
ATAD3B__chr1	0	0	1	0	0	1	3	0	0	0	0	1	0	1	0	1	0	0	0	2	0	0	0	1	0	0	0	0	0	1	1	1	1	0	1	2	0	0	2	3	0	0	0	2	0	0	0	0	0
ATAD3C__chr1	0	0	0	0	0	0	0	0	0	0	0	0	0	0	0	0	0	0	0	0	0	0	0	0	0	0	0	0	0	0	0	1	0	0	0	0	0	0	0	0	0	0	0	1	0	0	0	0	0
ATAD5__chr17	0	2	0	0	0	0	2	2	2	0	0	3	0	2	5	0	0	4	0	0	0	0	1	0	3	0	0	2	0	1	1	0	4	0	0	1	1	0	0	1	1	2	0	1	0	0	1	0	0
ATAT1__chr6	0	0	0	0	0	0	1	1	0	0	0	0	0	0	0	0	0	0	2	0	0	0	0	0	1	0	0	0	0	0	0	0	0	0	0	0	0	0	0	0	0	0	0	0	0	0	0	0	0
ATCAY__chr19	0	0	0	0	0	0	0	0	0	0	0	0	0	1	0	0	0	1	0	0	0	0	0	0	0	0	0	0	0	0	0	0	0	0	0	0	0	0	0	0	0	0	0	0	0	0	0	0	0
ATE1__chr10	0	0	0	0	0	0	0	0	0	0	1	0	0	0	0	0	0	1	1	0	0	0	0	0	0	0	1	0	0	0	1	2	1	3	1	0	0	0	1	2	0	0	1	0	0	0	0	0	0
ATF1__chr12	2	0	1	3	0	3	0	0	3	0	1	9.01	1	0	1	1	0	3	4	1	1	0	1	0	2	1	6	6	1	8.01	2	0	9.01	2	4	6	4	0	11.01	2	3	4	2	2	1	0	3	1	2
ATF2__chr2	0	1	2	1	0	2	0	0	1	0	1	1	2	1	0	3	0	1	1	0	0	0	0	1	0	0	0	4	2	4	4	2	3	0	5	2	2	3	3	0	2	1	1	1	0	0	0	2	1
ATF3__chr1	0	0	0	0	0	0	0	0	0	0	0	0	0	0	1	0	0	0	1	0	0	0	0	0	0	0	0	0	0	0	0	0	0	0	0	0	0	0	0	0	0	0	0	0	0	0	0	0	0
ATF4__chr22	7.01	8.01	13.02	7.01	0	10.01	10.01	6	8.01	0	9.01	17.03	10.01	10.01	12.02	6	0	10.01	7.01	4	4	1	10.01	4	7.01	11.01	7.01	14.02	7.01	27.09	13.02	21.05	24.07	4	21.05	2	10.01	9.01	21.05	13.02	19.04	34.14	13.02	18.04	0	0	10.01	9.01	19.04
ATF5__chr19	0	1	1	0	0	0	1	0	0	0	0	0	0	1	2	4	0	1	2	0	0	0	0	0	1	1	0	0	0	1	0	1	3	1	3	0	1	3	5	0	0	5	0	3	0	0	0	0	1
ATF6B__chr6	0	0	0	0	0	0	0	0	3	0	1	1	0	0	0	0	0	0	0	0	0	0	0	0	0	0	0	1	1	2	0	0	0	0	1	0	1	1	0	1	0	1	0	0	0	0	0	0	2
ATF6__chr1	1	1	3	1	0	3	5	4	3	0	2	13.02	1	4	3	4	0	2	5	1	3	0	6	2	4	2	3	3	0	4	12.02	6	4	1	12.02	1	4	2	7.01	8.01	0	4	1	8.01	0	1	2	0	7.01
ATF7IP2__chr16	0	0	0	0	0	0	0	0	0	0	0	0	1	0	0	0	0	0	0	0	0	0	0	0	0	0	0	0	0	0	0	1	0	0	2	0	0	0	0	0	0	0	0	0	0	0	0	0	0
ATF7IP__chr12	1	2	0	1	0	0	1	1	1	0	1	0	1	0	6	5	0	8.01	1	4	1	0	0	0	4	2	0	3	1	1	3	2	4	1	7.01	1	7.01	1	1	0	0	6	0	0	0	0	1	2	3
ATF7__chr12	1	2	0	1	0	0	0	0	0	0	0	1	0	0	0	2	0	0	0	0	0	0	2	0	2	0	2	0	1	2	4	1	1	0	1	0	0	2	3	0	2	0	1	1	0	0	0	0	0
ATG10__chr5	0	0	0	0	0	0	1	0	0	0	0	0	0	0	2	0	0	0	0	0	0	2	2	0	0	0	0	0	1	2	1	0	1	0	0	0	0	1	1	1	0	1	0	1	0	0	0	0	2
ATG12__chr5	2	2	3	1	0	2	0	1	3	0	3	3	0	0	0	3	0	1	1	0	3	0	1	0	1	1	2	0	0	4	10.01	7.01	2	0	6	4	1	2	5	6	2	1	2	4	0	0	0	1	1
ATG13__chr11	0	0	0	0	0	1	1	1	4	0	2	2	0	3	0	3	0	0	3	0	0	0	1	1	3	4	2	3	0	5	2	4	2	0	1	0	1	1	5	2	3	1	2	0	0	0	2	2	3
ATG14__chr14	0	0	2	0	0	1	0	0	2	0	1	3	0	1	3	2	0	1	1	1	0	0	0	1	0	0	2	0	0	1	3	2	1	0	3	3	0	0	1	0	0	3	0	1	0	0	0	0	1
ATG16L1__chr2	2	0	0	1	0	0	0	0	3	0	0	0	0	1	1	3	0	1	0	0	0	0	0	0	2	1	1	0	0	2	1	0	2	0	1	0	0	1	1	0	0	1	0	2	0	0	2	0	0
ATG16L2__chr11	0	0	0	0	0	0	1	0	0	0	0	0	0	0	0	0	0	4	0	0	0	0	0	0	0	0	0	0	0	1	0	0	0	0	0	0	0	0	1	3	0	0	0	0	0	0	0	0	0
ATG2A__chr11	0	0	0	0	0	0	0	1	0	0	0	0	0	0	1	0	0	0	0	1	0	0	0	0	0	0	0	0	0	2	1	0	1	0	0	0	0	0	0	0	0	0	0	0	0	0	0	0	0
ATG2B__chr14	0	1	0	0	0	0	2	0	1	0	0	2	0	1	0	1	0	1	1	0	0	0	0	0	3	2	0	0	0	1	1	1	0	1	2	0	3	1	1	0	0	0	1	5	0	0	0	2	0
ATG3__chr3	2	2	1	0	0	5	7.01	2	3	0	4	11.01	4	5	4	2	0	4	2	6	0	0	1	1	2	2	4	7.01	3	12.02	2	5	3	2	4	2	2	2	9.01	8.01	7.01	6	3	6	0	0	1	4	8.01
ATG4A__chrX	0	0	0	0	0	0	0	0	1	0	0	1	0	0	0	1	0	0	1	1	0	0	0	0	0	0	2	1	0	0	2	0	0	1	1	0	0	0	0	0	0	0	1	0	0	0	1	0	0
ATG4B__chr2	0	2	1	0	0	4	1	3	2	0	2	6	0	0	4	5	0	0	1	2	0	0	0	0	2	1	4	0	1	3	4	3	2	1	3	1	4	1	4	3	0	3	2	4	0	0	1	0	2
ATG4C__chr1	1	0	2	0	0	0	1	1	0	0	0	1	0	1	1	2	0	0	0	0	0	0	2	0	1	0	0	1	0	4	0	2	4	0	2	2	5	2	2	1	1	2	1	3	0	0	1	0	0
ATG4D__chr19	0	0	0	0	0	0	0	0	0	0	0	0	0	0	0	0	0	0	0	0	0	0	0	0	0	0	0	0	0	0	1	0	1	0	1	0	1	0	0	0	0	1	0	1	0	0	0	0	0
ATG5__chr6	2	0	4	2	0	0	2	0	2	0	3	4	2	2	2	1	0	2	0	0	0	0	3	0	1	2	0	0	0	10.01	1	4	2	0	7.01	2	1	1	3	1	3	2	1	2	0	0	0	4	4
ATG7__chr3	0	0	0	0	0	0	0	1	1	0	0	0	0	0	1	0	0	0	1	1	1	0	0	0	0	0	2	0	0	0	0	1	1	0	1	0	4	0	2	2	0	0	0	3	0	0	0	2	0
ATG9A__chr2	0	0	0	0	0	1	1	2	3	0	0	2	4	4	2	3	0	3	1	4	0	0	1	2	3	3	0	0	1	2	8.01	4	6	0	1	3	1	0	2	3	1	6	3	6	0	0	0	0	1
ATHL1__chr11	0	0	0	0	0	0	0	0	0	0	0	0	0	0	0	0	0	1	0	0	0	0	0	0	0	0	0	0	0	0	0	1	0	0	0	0	0	1	1	0	0	0	0	0	0	0	0	0	0
ATIC__chr2	3	2	6	3	0	2	5	1	3	0	1	10.01	1	6	2	5	0	3	2	5	1	0	5	2	6	3	6	4	3	11.01	7.01	6	2	1	3	2	6	4	8.01	7.01	3	6	6	13.02	0	0	3	3	4
ATL1__chr14	0	0	0	0	0	0	0	0	0	0	0	0	0	0	0	0	0	0	0	0	0	0	0	0	0	0	0	0	0	0	0	0	0	0	0	0	0	0	0	0	0	0	0	0	0	0	0	0	0
ATL2__chr2	0	0	0	1	0	2	0	1	4	0	1	2	0	0	1	0	0	0	1	0	0	0	0	1	0	0	0	1	0	0	1	3	0	2	1	1	3	0	2	1	3	0	0	3	0	0	1	1	0
ATL3__chr11	1	0	1	1	0	1	2	3	0	0	0	5	1	1	1	1	0	2	1	1	0	0	0	0	0	2	1	0	1	1	3	0	1	0	2	3	1	2	3	1	0	1	3	3	0	0	0	1	1
ATMIN__chr16	1	1	3	1	0	4	2	0	0	0	0	4	2	1	2	0	0	1	2	1	0	0	2	1	1	2	4	3	1	6	2	3	3	0	3	1	1	4	2	4	2	1	4	6	0	0	2	1	1
ATM__chr11	2	2	3	3	0	0	3	0	2	0	0	5	1	2	6	1	0	3	2	3	0	0	2	1	0	0	2	2	0	1	1	2	2	2	6	1	0	2	8.01	6	2	5	1	2	0	0	1	1	1
ATN1__chr12	4	3	7.01	3	0	3	5	4	21.05	0	3	7.01	2	8.01	11.01	9.01	0	4	8.01	5	1	0	2	1	1	0	6	2	4	3	19.04	24.07	12.02	0	4	1	7.01	5	13.02	13.02	2	9.01	4	15.03	1	2	2	1	13.02
ATOH7__chr10	0	0	0	0	0	0	0	0	0	0	0	0	0	0	0	0	0	0	0	0	0	0	0	0	0	0	0	0	0	0	0	0	0	0	0	0	0	0	0	0	0	0	0	0	0	0	0	0	0
ATOH8__chr2	0	0	3	0	0	0	0	0	0	0	0	0	1	1	1	0	0	0	0	1	0	0	0	0	0	2	0	0	0	1	1	0	2	0	3	0	0	1	2	1	0	2	1	4	0	0	1	0	0
ATOX1__chr5	1	0	2	1	0	0	0	0	2	0	2	4	0	0	6	0	0	1	0	0	1	2	2	0	2	1	4	2	0	7.01	2	2	1	0	4	2	1	1	2	0	0	0	3	5	0	0	1	3	1
ATP10A__chr15	0	0	0	0	0	0	0	0	1	0	0	0	0	0	1	2	0	0	0	0	0	0	1	0	1	0	0	0	0	1	0	2	1	0	0	0	0	0	1	0	1	0	1	0	0	0	0	0	0
ATP10D__chr4	1	2	1	1	0	0	2	0	0	0	0	4	1	0	0	2	0	0	1	0	0	0	2	3	0	0	1	0	1	8.01	0	1	0	0	0	1	0	2	3	4	3	2	0	3	0	0	0	0	1
ATP11A__chr13	0	0	0	0	0	0	0	0	0	0	1	3	0	0	4	1	0	0	0	0	1	0	0	0	0	0	0	1	0	1	3	2	0	0	0	0	0	3	0	0	0	0	1	1	0	0	0	0	1
ATP11B__chr3	0	2	0	0	0	1	2	0	1	0	1	2	0	2	0	0	0	1	1	1	0	0	1	1	2	0	0	2	0	4	2	3	2	1	3	1	3	1	3	2	2	2	1	2	0	0	1	2	3
ATP11C__chrX	1	1	0	1	0	5	1	1	0	0	0	4	0	0	4	1	0	1	0	0	0	0	3	0	2	0	0	0	0	3	4	4	3	3	4	2	1	0	5	1	2	2	1	5	0	0	5	1	1
ATP13A1__chr19	0	3	2	1	0	1	1	1	4	0	1	2	0	1	3	1	0	3	0	1	0	0	3	0	2	3	2	0	0	1	4	2	3	0	2	0	2	4	0	0	0	7.01	3	4	0	0	0	1	2
ATP13A2__chr1	1	4	2	0	0	2	1	1	2	0	2	4	1	0	4	1	0	0	2	1	0	0	1	1	3	3	3	1	2	5	5	1	5	0	1	0	1	0	5	4	1	3	2	5	0	0	2	1	2
ATP13A3__chr3	5	5	5	3	0	6	3	3	8.01	0	7.01	13.02	5	7.01	5	5	0	7.01	7.01	0	1	1	5	0	8.01	1	13.02	12.02	6	13.02	11.01	11.01	12.02	1	6	5	11.01	4	10.01	5	1	8.01	8.01	7.01	0	0	4	4	9.01
ATP1A1OS__chr1	0	0	1	0	0	0	0	0	0	0	0	0	0	0	0	0	0	0	0	0	0	0	0	0	0	0	0	0	0	0	0	0	0	0	0	0	0	0	0	0	0	0	0	1	0	0	0	0	0
ATP1A1__chr1	3	3	4	2	0	6	7.01	2	13.02	0	4	8.01	7.01	5	11.01	6	0	4	10.01	4	3	1	5	1	4	4	8.01	1	4	5	11.01	10.01	7.01	0	13.02	5	5	13.02	8.01	16.03	2	11.01	5	15.03	0	1	3	2	4
ATP1A2__chr1	0	0	0	0	0	0	0	0	0	0	0	0	0	0	0	0	0	0	0	0	0	0	0	0	0	0	0	0	0	0	0	0	0	0	0	0	0	0	0	0	0	0	0	0	0	0	0	0	0
ATP1A3__chr19	0	0	0	0	0	0	0	0	0	0	0	0	0	0	1	0	0	0	0	0	0	0	0	0	0	0	0	0	0	0	0	0	0	0	0	1	0	0	0	0	0	0	0	0	0	0	0	0	0
ATP1B1__chr1	0	1	5	1	0	2	8.01	1	3	0	0	10.01	1	2	7.01	3	0	6	2	0	2	1	2	0	15.03	2	11.01	7.01	3	11.01	10.01	4	8.01	3	3	9.01	7.01	2	12.02	8.01	2	4	17.03	8.01	0	0	2	2	1
ATP1B2__chr17	0	0	0	0	0	0	0	0	1	0	0	0	0	0	0	0	0	0	0	0	0	0	0	0	0	0	0	0	0	0	0	0	0	0	0	0	0	1	0	0	0	0	0	0	0	0	0	0	0
ATP1B3__chr3	13.02	18.04	11.01	8.01	0	21.05	22.06	16.03	18.04	3	12.02	26.08	11.01	15.03	17.03	20.05	1	28.09	17.03	15.03	4	4	7.01	9.01	16.03	16.03	26.08	27.09	17.03	30.11	31.11	28.09	32.12	9.01	15.03	21.05	18.04	18.04	44.23	32.12	19.04	29.1	10.01	38.17	1	1	13.02	14.02	8.01
ATP2A1__chr16	0	0	0	0	0	0	0	0	0	0	0	0	0	0	0	0	0	0	0	0	0	0	0	0	1	0	0	0	0	0	0	0	0	0	0	0	0	0	0	0	0	0	0	0	0	0	0	0	0
ATP2A2__chr12	11.01	13.02	10.01	7.01	0	14.02	18.04	9.01	21.05	0	4	45.24	8.01	22.06	28.09	12.02	0	12.02	13.02	6	4	3	16.03	9.01	13.02	21.05	26.08	17.03	18.04	51.31	27.09	36.15	31.11	9.01	31.11	6	18.04	13.02	29.1	32.12	13.02	18.04	13.02	42.21	0	1	7.01	11.01	17.03
ATP2B1__chr12	1	3	5	5	0	6	4	2	6	0	1	9.01	9.01	6	8.01	15.03	0	6	3	1	1	0	5	6	0	4	6	11.01	3	7.01	8.01	10.01	11.01	0	7.01	4	20.05	4	15.03	10.01	5	33.13	5	8.01	0	0	3	3	5
ATP2B4__chr1	6	7.01	10.01	9.01	1	10.01	13.02	7.01	10.01	0	11.01	29.1	5	6	8.01	10.01	0	13.02	4	10.01	4	0	5	4	11.01	8.01	7.01	3	7.01	30.11	15.03	10.01	10.01	1	14.02	3	11.01	14.02	13.02	25.07	4	6	12.02	16.03	0	0	3	6	10.01
ATP2C1__chr3	0	0	3	0	1	1	6	2	3	0	4	6	0	1	3	1	0	1	0	1	0	0	2	0	3	4	5	3	4	7.01	5	2	2	1	2	1	3	4	3	4	2	3	2	2	0	0	2	2	2
ATP2C2__chr16	0	0	0	0	0	0	0	0	0	0	0	1	0	0	0	0	0	0	0	0	0	0	0	0	0	0	0	0	0	0	0	0	0	0	0	0	0	0	0	0	0	0	0	1	0	0	0	0	0
ATP4B__chr13	0	0	0	0	0	0	0	0	0	0	0	0	0	0	0	0	0	1	0	0	0	0	0	0	0	0	0	0	0	0	0	0	0	0	0	0	0	0	0	0	0	0	0	0	0	0	0	0	0
ATP5A1__chr18	10.01	10.01	16.03	16.03	0	27.09	16.03	10.01	15.03	1	17.03	42.21	9.01	23.06	25.07	25.07	1	25.07	21.05	11.01	17.03	1	13.02	6	25.07	22.06	31.11	30.11	22.06	55.37	62.47	33.13	35.15	10.01	35.15	26.08	23.06	19.04	52.33	29.1	30.11	28.09	24.07	49.29	0	0	27.09	10.01	39.18
ATP5B__chr12	21.05	21.05	34.14	13.02	1	38.17	32.12	11.01	47.27	0	21.05	67.55	18.04	26.08	50.3	33.13	0	40.19	22.06	12.02	14.02	6	25.07	9.01	30.11	30.11	34.14	35.15	22.06	70.6	82.82	67.55	64.5	24.07	44.23	25.07	32.12	31.11	82.82	58.41	38.17	51.31	33.13	56.38	1	1	20.05	24.07	40.19
ATP5C1__chr10	1	4	8.01	5	0	12.02	6	2	7.01	0	7.01	15.03	3	7.01	11.01	8.01	0	7.01	9.01	7.01	3	0	3	3	10.01	5	12.02	15.03	8.01	7.01	8.01	6	8.01	0	14.02	3	10.01	11.01	11.01	16.03	8.01	10.01	10.01	10.01	1	0	8.01	6	7.01
ATP5D__chr19	4	3	9.01	0	0	3	4	4	3	0	1	4	3	6	6	11.01	0	4	5	2	0	1	1	1	5	2	4	4	4	11.01	7.01	10.01	6	1	7.01	3	8.01	4	12.02	7.01	1	4	9.01	4	0	0	2	8.01	3
ATP5EP2__chr13	0	0	2	0	0	1	1	0	1	0	0	2	0	3	3	0	0	2	1	0	1	0	0	0	1	0	3	0	0	6	2	1	0	0	4	0	3	1	2	0	1	3	2	0	0	0	1	2	6
ATP5E__chr20	1	0	1	0	0	1	1	0	0	0	0	4	0	2	1	2	0	0	1	0	0	0	1	1	0	1	3	1	0	2	0	1	0	0	3	1	4	4	1	2	4	0	0	2	0	0	3	0	0
ATP5F1__chr1	9.01	8.01	6	1	0	6	4	2	6	1	10.01	25.07	2	9.01	10.01	9.01	0	4	9.01	3	3	3	9.01	4	7.01	9.01	16.03	10.01	7.01	28.09	10.01	15.03	13.02	12.02	11.01	22.06	9.01	7.01	17.03	6	16.03	17.03	10.01	9.01	2	1	13.02	9.01	19.04
ATP5G1__chr17	7.01	6	8.01	4	0	11.01	11.01	2	11.01	0	7.01	12.02	5	7.01	11.01	5	0	16.03	7.01	2	2	0	6	3	7.01	7.01	17.03	5	5	9.01	11.01	13.02	22.06	4	15.03	16.03	11.01	5	7.01	19.04	13.02	3	10.01	19.04	1	0	6	8.01	10.01
ATP5G2__chr12	8.01	13.02	21.05	8.01	0	21.05	9.01	11.01	21.05	0	7.01	27.09	14.02	20.05	20.05	18.04	0	23.06	11.01	13.02	8.01	2	17.03	4	9.01	19.04	18.04	9.01	6	26.08	21.05	29.1	26.08	8.01	28.09	17.03	22.06	16.03	30.11	30.11	18.04	18.04	26.08	38.17	2	1	9.01	17.03	23.06
ATP5G3__chr2	10.01	20.05	13.02	10.01	0	20.05	13.02	8.01	15.03	1	22.06	44.23	12.02	20.05	36.15	15.03	0	14.02	17.03	14.02	5	4	14.02	6	15.03	13.02	27.09	22.06	17.03	44.23	34.14	31.11	26.08	11.01	29.1	25.07	25.07	14.02	34.14	30.11	20.05	24.07	33.13	23.06	3	1	20.05	21.05	28.09
ATP5H__chr17	1	4	9.01	3	0	6	6	1	5	0	7.01	17.03	3	2	11.01	6	0	4	10.01	4	3	2	5	1	1	8.01	7.01	1	8.01	10.01	9.01	12.02	6	7.01	19.04	10.01	16.03	10.01	10.01	13.02	7.01	19.04	13.02	21.05	0	0	8.01	5	7.01
ATP5I__chr4	3	2	2	0	0	0	4	0	4	0	5	6	3	0	3	1	0	2	1	2	0	0	2	1	0	2	3	2	0	3	1	2	2	0	3	2	1	0	2	2	2	4	7.01	3	0	0	1	3	4
ATP5J2-PTCD1__chr7	0	0	0	0	0	0	0	0	0	0	0	0	0	0	0	0	0	0	0	0	0	0	0	0	0	0	0	0	0	0	0	0	0	0	0	0	0	0	0	0	0	0	0	0	0	0	0	0	0
ATP5J2__chr7	3	6	5	2	0	10.01	8.01	4	6	0	12.02	21.05	1	8.01	10.01	3	0	7.01	11.01	10.01	4	1	7.01	1	11.01	4	14.02	6	6	22.06	9.01	24.07	13.02	6	14.02	14.02	13.02	4	9.01	18.04	7.01	14.02	16.03	20.05	0	0	3	3	21.05
ATP5J__chr21	15.03	9.01	16.03	7.01	0	14.02	12.02	10.01	5	0	9.01	46.25	4	14.02	18.04	6	0	16.03	6	6	0	3	4	7.01	16.03	12.02	25.07	16.03	10.01	53.34	22.06	24.07	10.01	19.04	21.05	12.02	22.06	12.02	29.1	8.01	9.01	14.02	20.05	20.05	1	0	11.01	16.03	27.09
ATP5L2__chr22	1	0	0	0	0	0	0	0	0	0	0	0	0	1	1	1	0	0	0	0	0	0	0	0	0	1	0	0	0	0	1	0	0	0	2	0	1	0	0	0	0	0	0	0	0	0	0	0	0
ATP5L__chr11	1	1	5	3	0	10.01	2	1	3	0	3	10.01	5	6	7.01	10.01	0	4	7.01	2	6	1	6	3	9.01	2	11.01	7.01	2	17.03	15.03	6	14.02	7.01	18.04	12.02	11.01	9.01	11.01	7.01	5	14.02	17.03	10.01	1	1	7.01	9.01	5
ATP5O__chr21	9.01	9.01	17.03	4	0	15.03	7.01	6	6	0	13.02	26.08	6	19.04	18.04	9.01	0	8.01	8.01	9.01	3	2	8.01	5	12.02	12.02	15.03	13.02	7.01	25.07	17.03	23.06	20.05	8.01	26.08	13.02	21.05	10.01	17.03	25.07	13.02	18.04	19.04	13.02	0	0	16.03	12.02	14.02
ATP5SL__chr19	1	0	1	1	0	4	2	2	4	0	0	4	0	0	5	5	0	7.01	5	1	0	1	2	3	2	1	4	5	1	8.01	4	6	5	2	8.01	2	4	2	10.01	6	1	5	5	3	0	0	3	0	5
ATP5S__chr14	0	0	1	0	0	1	0	0	0	0	0	1	1	0	1	1	0	1	0	0	0	0	0	0	1	0	1	0	0	1	1	0	0	0	0	2	0	2	0	2	0	3	1	1	0	0	0	0	0
ATP6AP1L__chr5	0	0	0	0	0	0	0	0	0	0	0	0	0	0	0	0	0	0	0	0	0	0	0	0	0	0	0	0	0	0	0	0	0	0	0	0	0	0	1	0	0	0	0	0	0	0	0	0	0
ATP6AP1__chrX	2	5	0	0	0	0	2	0	5	0	0	3	2	3	2	4	0	3	3	3	0	0	2	0	4	1	5	0	2	1	6	8.01	0	0	5	2	5	0	9.01	5	2	0	0	5	0	0	0	3	4
ATP6AP2__chrX	3	2	3	3	0	4	7.01	1	12.02	0	3	14.02	1	3	5	4	0	2	3	2	0	0	2	2	3	1	7.01	6	4	9.01	4	5	4	0	5	6	11.01	6	7.01	4	6	6	6	7.01	0	0	5	1	10.01
ATP6V0A1__chr17	2	0	0	0	0	0	2	1	4	0	0	2	0	1	1	2	0	0	2	0	0	0	2	0	1	0	0	0	0	0	5	1	3	0	2	3	2	0	3	1	1	2	0	1	0	0	1	0	1
ATP6V0A2__chr12	0	0	1	2	0	0	3	1	3	0	0	2	1	0	3	2	0	2	0	0	0	0	1	1	4	0	4	1	1	4	1	0	0	3	4	1	4	0	3	1	1	3	1	0	0	0	1	0	1
ATP6V0A4__chr7	0	0	0	0	0	0	0	0	0	0	0	0	0	0	0	0	0	0	0	0	0	0	0	0	0	0	0	0	0	0	0	0	0	0	0	0	0	0	0	0	0	0	0	0	0	0	0	0	2
ATP6V0B__chr1	6	2	11.01	2	0	10.01	6	6	13.02	0	5	8.01	1	3	2	10.01	0	6	7.01	2	1	1	0	1	9.01	1	9.01	8.01	3	32.12	15.03	14.02	16.03	5	10.01	11.01	5	3	13.02	12.02	11.01	11.01	6	11.01	0	0	11.01	7.01	12.02
ATP6V0C__chr16	10.01	25.07	15.03	2	0	15.03	25.07	8.01	23.06	1	11.01	29.1	8.01	23.06	36.15	26.08	0	27.09	16.03	7.01	3	1	18.04	4	24.07	10.01	26.08	7.01	12.02	33.13	34.14	30.11	39.18	4	32.12	8.01	28.09	17.03	29.1	54.35	4	32.12	14.02	42.21	0	0	5	31.11	20.05
ATP6V0D1__chr16	2	4	8.01	2	0	3	4	2	2	0	4	3	2	2	7.01	3	0	3	2	0	0	1	1	1	5	2	4	2	7.01	6	2	5	6	0	5	7.01	5	3	5	3	1	1	4	7.01	0	0	1	4	2
ATP6V0E1__chr5	5	9.01	5	2	1	6	5	3	8.01	0	0	16.03	4	8.01	4	8.01	0	1	1	6	5	1	3	4	5	2	4	3	2	16.03	16.03	14.02	8.01	1	8.01	3	6	7.01	8.01	10.01	7.01	7.01	10.01	9.01	0	1	3	6	13.02
ATP6V0E2-AS1__chr7	0	0	0	0	0	0	0	0	0	0	0	0	1	0	0	0	0	0	0	0	0	0	0	0	0	0	0	0	0	0	0	1	0	0	0	0	0	0	0	0	1	0	0	0	1	0	1	0	0
ATP6V0E2__chr7	0	2	0	0	0	1	1	0	6	0	0	1	0	1	5	0	0	1	1	0	0	0	0	0	0	0	0	0	2	4	5	3	3	0	1	2	2	0	2	7.01	0	3	2	2	0	0	0	2	1
ATP6V1A__chr3	2	1	7.01	2	0	5	3	3	1	0	1	12.02	1	1	9.01	5	0	3	5	1	3	1	4	3	8.01	6	11.01	2	2	12.02	10.01	4	4	2	3	1	10.01	1	7.01	6	11.01	11.01	5	12.02	1	0	4	6	8.01
ATP6V1B1__chr2	0	0	0	0	0	0	0	0	0	0	0	0	1	0	0	0	0	0	0	1	0	0	0	0	0	0	0	0	0	0	0	1	0	0	0	0	1	0	0	0	0	0	0	0	0	0	0	0	0
ATP6V1B2__chr8	6	12.02	18.04	5	0	6	8.01	3	6	0	4	9.01	7.01	2	10.01	11.01	0	2	2	5	2	1	8.01	3	11.01	6	14.02	6	2	15.03	15.03	14.02	29.1	7.01	14.02	16.03	10.01	11.01	28.09	18.04	2	18.04	9.01	10.01	0	0	12.02	7.01	17.03
ATP6V1C1__chr8	1	4	2	0	0	1	2	0	0	0	1	6	2	2	4	1	0	1	3	3	0	0	1	1	0	2	0	2	0	9.01	3	4	1	0	7.01	1	4	0	5	0	2	4	2	7.01	0	0	2	0	2
ATP6V1D__chr14	3	3	4	4	0	7.01	7.01	1	8.01	0	5	6	1	6	7.01	3	0	8.01	4	1	4	0	3	0	6	2	7.01	11.01	5	15.03	13.02	8.01	10.01	2	10.01	12.02	6	6	16.03	9.01	5	6	6	0	0	1	2	7.01	8.01
ATP6V1E1__chr22	2	7.01	7.01	5	0	6	4	2	4	0	4	18.04	2	5	4	3	0	5	4	1	2	0	2	1	5	2	2	4	2	8.01	12.02	9.01	6	0	9.01	4	5	7.01	15.03	6	5	7.01	5	7.01	0	0	4	3	12.02
ATP6V1E2__chr2	0	0	0	0	0	0	0	0	0	0	0	0	0	0	0	0	0	0	0	0	0	0	0	0	0	0	0	0	0	0	0	0	1	0	0	0	0	0	0	0	0	0	0	1	0	0	0	0	1
ATP6V1F__chr7	3	7.01	5	1	1	1	2	1	6	0	4	11.01	2	0	11.01	5	0	4	7.01	5	4	0	2	1	3	6	6	3	6	11.01	7.01	5	13.02	4	13.02	2	6	2	13.02	11.01	6	4	9.01	8.01	0	0	1	10.01	12.02
ATP6V1G1__chr9	3	1	4	3	0	2	4	0	6	0	3	7.01	2	2	3	0	0	2	3	4	1	0	2	2	2	2	2	6	0	7.01	3	3	1	0	3	1	3	2	4	9.01	6	2	6	3	0	1	1	2	3
ATP6V1G2__chr6	0	0	0	0	0	0	0	0	0	0	0	0	0	0	0	0	0	0	0	0	0	0	0	0	0	0	1	0	0	0	0	0	0	0	0	0	0	0	0	0	0	0	0	0	0	0	0	0	0
ATP6V1G3__chr1	0	0	0	0	0	0	0	0	0	0	0	0	0	0	0	0	0	0	0	0	0	0	0	0	0	0	0	0	0	0	0	0	1	0	0	0	0	0	0	0	0	0	0	0	0	0	0	0	0
ATP6V1H__chr8	1	0	5	1	0	4	4	3	2	0	2	3	2	2	1	2	0	2	3	1	3	0	1	0	1	0	1	5	1	4	2	6	1	0	0	1	1	0	2	2	2	4	2	3	0	0	2	4	1
ATP7A__chrX	0	0	0	0	0	0	1	0	0	0	0	1	0	0	1	0	0	0	0	0	0	0	0	2	0	0	1	0	0	0	0	0	0	0	0	1	1	0	0	0	0	0	2	1	0	0	0	0	0
ATP7B__chr13	0	0	0	0	0	0	0	0	0	0	0	0	0	1	0	0	0	0	0	0	0	0	0	0	0	0	0	0	0	0	0	0	0	0	0	0	0	0	0	0	0	0	0	0	0	0	0	0	0
ATP8A1__chr4	0	0	0	0	0	0	0	0	0	0	0	0	0	0	0	0	0	0	0	0	0	0	0	0	0	0	0	0	0	0	0	0	0	0	0	0	0	0	0	0	0	0	0	0	0	0	0	0	0
ATP8A2__chr13	0	0	0	0	0	0	0	0	0	0	0	0	0	0	0	0	0	0	0	0	0	0	0	0	0	0	0	0	0	0	0	0	1	0	0	0	0	0	0	0	0	0	0	0	0	0	0	0	0
ATP8B1__chr18	6	4	3	6	0	8.01	4	3	10.01	0	7.01	19.04	7.01	11.01	25.07	15.03	0	5	5	0	3	1	2	2	4	4	10.01	12.02	2	15.03	7.01	23.06	17.03	2	8.01	7.01	8.01	2	16.03	18.04	1	14.02	7.01	6	3	0	10.01	4	11.01
ATP8B2__chr1	0	1	1	0	0	0	0	0	0	0	0	2	0	1	1	1	0	0	0	1	0	0	0	0	0	0	1	0	0	1	2	1	0	0	0	0	0	1	2	0	2	0	0	1	0	0	0	0	0
ATP8B3__chr19	0	0	0	0	0	0	0	0	0	0	0	0	0	0	0	0	0	0	0	0	0	0	0	0	0	0	0	0	0	0	0	0	0	0	0	0	1	0	0	0	0	0	0	0	0	0	0	0	0
ATP8B5P__chr9	0	0	0	0	0	0	0	0	0	0	0	0	0	0	0	0	0	0	0	0	0	0	0	0	0	0	0	0	0	0	0	0	1	0	0	0	0	0	0	0	0	0	0	0	0	0	0	0	0
ATP9A__chr20	0	5	0	0	0	0	2	0	3	0	0	2	0	1	1	0	0	0	0	0	2	0	1	1	2	1	1	1	0	2	5	3	1	1	2	0	0	2	1	2	0	0	0	2	1	0	0	1	0
ATP9B__chr18	0	0	0	0	0	1	0	0	2	0	1	0	0	2	0	0	0	0	0	0	0	0	2	0	0	0	0	1	0	1	1	1	0	0	1	0	0	0	0	0	0	0	0	3	0	0	0	0	1
ATPAF1__chr1	1	3	2	1	0	0	1	2	2	0	1	4	0	2	2	2	0	5	3	1	0	0	2	2	0	5	0	2	4	2	5	4	2	1	3	3	1	1	2	3	0	1	1	7.01	0	0	3	2	2
ATPAF2__chr17	0	0	0	0	0	1	0	1	2	0	1	1	0	0	1	0	0	0	0	0	0	0	0	0	0	0	0	0	0	1	3	1	0	0	0	0	1	1	3	0	0	0	1	1	0	0	1	0	0
ATPBD4__chr15	1	0	0	1	0	0	0	0	1	0	0	0	0	0	0	0	0	0	1	0	0	0	0	1	0	0	0	1	0	0	0	0	0	1	1	2	1	0	2	0	2	0	0	1	0	0	0	0	0
ATPIF1__chr1	2	7.01	15.03	7.01	0	11.01	9.01	5	6	0	8.01	31.11	9.01	9.01	19.04	10.01	0	13.02	8.01	4	5	1	5	2	20.05	4	12.02	9.01	5	27.09	10.01	19.04	14.02	6	12.02	8.01	13.02	7.01	7.01	14.02	8.01	18.04	16.03	13.02	0	1	5	7.01	26.08
ATRAID__chr2	1	3	6	6	0	3	5	0	3	0	3	8.01	2	4	11.01	4	0	4	5	5	2	1	2	4	9.01	5	5	5	3	7.01	5	11.01	9.01	0	10.01	10.01	5	7.01	10.01	10.01	4	11.01	5	7.01	1	0	6	2	3
ATRIP__chr3	0	0	0	0	0	0	2	0	0	0	0	0	1	0	2	0	0	0	0	0	0	0	0	0	0	0	0	0	0	0	1	1	0	0	1	0	0	1	2	0	1	0	1	1	0	0	0	0	0
ATRNL1__chr10	1	0	3	0	0	1	0	0	1	0	1	0	0	1	0	1	0	0	0	1	0	0	0	1	0	0	0	1	2	2	1	0	2	0	2	1	0	0	1	0	0	0	0	3	0	0	1	0	0
ATRN__chr20	3	1	0	3	0	0	0	1	3	0	3	1	0	0	1	0	0	1	0	0	0	0	1	0	0	5	1	2	0	1	1	4	0	0	1	0	1	1	2	0	3	1	0	0	0	0	1	0	0
ATRX__chrX	5	3	2	8.01	0	6	11.01	7.01	9.01	0	5	25.07	5	6	15.03	7.01	0	10.01	16.03	3	1	0	10.01	1	12.02	3	2	8.01	10.01	16.03	21.05	8.01	8.01	5	10.01	9.01	12.02	4	16.03	20.05	2	16.03	3	11.01	1	0	5	4	12.02
ATR__chr3	0	1	1	0	0	1	1	0	0	0	1	3	2	0	2	1	0	2	2	0	0	0	0	0	1	0	1	2	1	1	3	0	5	1	1	1	2	1	0	0	1	1	1	2	1	0	0	2	1
ATXN10__chr22	2	5	9.01	3	0	4	6	3	10.01	0	2	14.02	2	5	11.01	2	0	2	7.01	4	1	0	4	6	4	6	6	8.01	0	11.01	7.01	13.02	10.01	4	12.02	11.01	9.01	5	8.01	10.01	5	6	6	4	0	0	6	4	7.01
ATXN1L__chr16	0	1	1	0	0	0	1	0	1	0	0	2	0	0	1	3	0	1	0	0	0	0	0	0	1	0	0	0	1	0	0	2	2	0	0	3	0	1	0	2	0	0	0	1	0	0	0	2	0
ATXN1__chr6	0	1	3	0	0	4	0	3	2	0	1	3	0	1	1	0	0	0	1	1	0	0	0	0	1	2	1	3	0	2	3	1	5	1	4	9.01	2	4	7.01	2	0	3	1	2	0	0	2	3	2
ATXN2L__chr16	0	0	3	1	0	1	1	0	2	0	1	1	3	1	1	0	0	2	2	1	0	0	0	0	1	0	1	0	0	0	2	5	6	2	2	0	1	4	4	2	0	5	1	10.01	0	0	0	0	0
ATXN2__chr12	1	9.01	8.01	3	0	6	7.01	7.01	9.01	0	5	6	9.01	7.01	18.04	9.01	0	5	3	4	2	1	4	0	0	4	11.01	11.01	4	10.01	18.04	11.01	25.07	2	11.01	9.01	6	6	12.02	9.01	5	23.06	6	21.05	0	1	1	6	4
ATXN3__chr14	0	1	1	0	0	0	0	1	0	0	1	1	1	0	0	1	0	1	0	0	0	0	0	0	0	0	0	0	0	0	3	0	0	1	3	0	1	2	1	0	2	3	2	0	0	0	0	0	1
ATXN7L1__chr7	0	0	0	0	0	0	0	0	0	0	0	0	0	0	0	0	0	0	0	0	0	0	0	0	0	0	0	0	0	0	0	1	1	0	0	0	0	0	0	0	0	0	0	0	0	0	0	0	2
ATXN7L2__chr1	0	0	0	0	0	0	1	0	0	0	0	1	0	0	0	0	0	0	0	0	0	0	0	0	0	0	0	0	1	0	0	0	0	0	0	0	1	0	0	0	0	0	0	2	0	0	0	0	0
ATXN7L3B__chr12	1	3	1	1	0	6	2	4	5	0	5	10.01	3	5	8.01	4	0	2	2	0	1	1	4	1	3	6	6	4	5	5	10.01	7.01	6	2	10.01	2	2	1	12.02	3	1	8.01	3	8.01	0	0	1	5	9.01
ATXN7L3__chr17	0	0	1	0	0	3	1	0	1	0	1	1	1	0	1	1	0	1	1	1	0	0	0	1	3	1	3	1	0	0	2	5	2	0	1	0	1	2	3	1	1	5	3	3	0	0	1	0	1
ATXN7__chr3	0	1	1	0	0	1	0	0	0	0	0	1	0	1	1	1	0	1	0	0	0	0	1	0	0	0	1	0	0	1	1	0	1	0	4	0	2	1	0	2	1	1	2	4	0	0	0	0	1
AUH__chr9	0	1	0	0	0	0	0	0	1	0	0	0	0	0	0	0	0	0	0	0	0	0	0	0	0	1	0	0	0	0	1	1	1	0	0	0	0	0	0	0	0	0	0	0	0	0	0	1	1
AUNIP__chr1	0	0	0	0	0	1	0	0	0	0	0	0	0	0	0	0	0	0	0	0	0	0	0	0	0	0	0	1	0	0	1	2	0	0	0	0	2	0	0	0	0	1	0	0	0	0	0	0	0
AUP1__chr2	1	1	2	1	0	6	2	1	4	0	1	3	2	6	5	3	0	5	3	1	1	1	3	1	2	5	7.01	3	7.01	8.01	7.01	7.01	4	0	7.01	2	10.01	2	11.01	10.01	1	4	3	13.02	0	0	2	3	1
AURKAIP1__chr1	2	0	5	1	0	5	8.01	1	7.01	0	1	5	0	2	3	3	0	3	6	3	1	1	3	2	3	1	5	2	4	3	7.01	7.01	12.02	1	4	1	4	3	9.01	12.02	3	3	5	6	0	0	0	2	1
AURKAPS1__chr1	0	0	0	0	0	0	0	0	0	0	0	0	0	0	0	0	0	0	0	0	0	0	0	0	0	0	0	0	0	0	0	0	0	0	0	0	0	0	0	0	0	0	0	0	0	0	0	0	0
AURKA__chr20	11.01	8.01	18.04	7.01	0	16.03	4	7.01	9.01	0	15.03	5	6	2	2	8.01	0	3	0	10.01	8.01	4	16.03	12.02	1	0	0	2	1	11.01	22.06	34.14	24.07	7.01	40.19	16.03	28.09	13.02	33.13	24.07	13.02	25.07	8.01	23.06	1	0	8.01	20.05	6
AURKB__chr17	3	3	10.01	1	0	5	10.01	1	3	0	5	7.01	3	5	4	7.01	0	6	1	2	5	0	6	5	3	0	0	9.01	4	6	12.02	22.06	14.02	4	12.02	7.01	13.02	11.01	16.03	20.05	10.01	16.03	9.01	16.03	0	0	6	14.02	5
AUTS2__chr7	0	0	0	0	0	0	1	0	1	0	0	0	0	0	2	0	0	0	0	0	0	0	0	0	1	0	0	0	1	3	0	0	0	0	1	0	0	1	0	0	0	0	0	0	0	0	0	0	0
AVEN__chr15	1	0	0	0	0	1	4	1	1	0	0	3	1	0	3	4	0	1	0	1	0	1	0	0	1	0	3	1	3	3	1	1	2	0	0	0	0	2	4	3	0	2	1	5	0	0	4	1	3
AVIL__chr12	0	0	0	0	0	0	0	0	1	0	1	0	1	0	0	0	0	0	0	0	0	0	1	0	0	0	0	0	0	0	0	0	0	0	0	0	0	0	0	0	0	0	0	0	0	0	0	0	1
AVL9__chr7	0	0	0	0	0	0	0	0	0	0	0	0	0	0	0	0	0	1	1	0	0	0	0	0	0	0	0	0	0	0	0	0	0	0	2	0	0	0	1	0	0	0	0	0	0	0	0	1	0
AVPI1__chr10	1	0	0	0	0	0	1	0	0	0	0	2	0	0	1	1	0	1	1	0	0	0	1	0	2	1	3	1	2	2	1	0	1	0	0	0	0	0	1	0	1	0	1	0	0	0	0	0	0
AVPR1A__chr12	0	0	0	0	0	0	0	0	0	0	0	0	0	0	0	0	0	0	0	0	0	0	0	0	0	0	0	0	0	0	0	0	0	0	0	0	0	0	0	0	0	0	0	0	0	0	0	0	0
AWAT1__chrX	0	0	0	0	0	0	0	0	0	0	0	0	0	0	1	0	0	0	0	0	0	0	0	0	0	0	0	0	0	0	0	0	0	0	0	0	0	0	0	0	0	0	0	0	0	0	0	0	0
AXDND1__chr1	0	0	0	0	0	0	0	0	0	0	0	0	0	0	0	0	0	0	0	0	0	0	0	0	1	0	0	0	0	0	0	0	0	0	0	0	0	0	0	0	0	0	0	0	0	0	0	0	0
AXIN1__chr16	0	0	2	0	0	2	0	0	1	0	1	1	1	1	3	3	0	1	2	0	0	0	1	1	0	0	2	2	0	1	0	1	0	0	1	0	1	1	3	2	0	3	0	2	0	0	1	0	1
AXIN2__chr17	0	0	0	0	0	0	0	0	0	0	0	0	0	0	0	0	0	1	0	0	0	0	0	0	0	0	0	0	0	0	0	0	0	0	0	0	0	0	0	0	0	1	0	0	0	0	0	0	0
AXL__chr19	26.08	20.05	33.13	5	1	40.19	46.25	6	33.13	1	29.1	57.39	11.01	25.07	36.15	19.04	0	20.05	3	20.05	8.01	2	11.01	8.01	15.03	28.09	36.15	18.04	30.11	89.97	72.63	92.01	56.38	21.05	61.45	35.15	39.18	20.05	88.95	71.61	35.15	39.18	49.29	60.44	0	0	27.09	20.05	35.15
AZI1__chr17	0	0	0	0	0	1	0	0	0	0	0	0	0	0	0	0	0	1	0	0	1	0	0	0	0	0	0	0	0	0	1	1	2	0	0	0	0	0	2	0	0	0	2	2	0	0	0	0	0
AZI2__chr3	0	0	1	1	0	2	3	1	0	0	2	6	1	1	2	0	0	1	1	0	1	0	1	1	0	5	3	1	1	4	5	1	2	2	3	0	3	1	4	3	3	1	0	2	0	0	1	1	0
AZIN1__chr8	2	2	9.01	3	0	12.02	8.01	0	2	0	8.01	12.02	6	8.01	4	4	0	8.01	9.01	5	3	2	5	4	6	3	9.01	6	8.01	17.03	2	2	8.01	4	14.02	4	9.01	4	12.02	6	7.01	8.01	2	7.01	1	0	7.01	4	10.01
B2M__chr15	14.02	13.02	20.05	14.02	0	16.03	20.05	10.01	17.03	0	19.04	30.11	14.02	22.06	29.1	14.02	0	13.02	19.04	11.01	8.01	4	11.01	3	24.07	15.03	41.2	23.06	12.02	42.21	22.06	32.12	37.16	7.01	39.18	22.06	26.08	24.07	47.27	30.11	30.11	38.17	31.11	32.12	2	1	15.03	29.1	29.1
B3GALNT1__chr3	0	1	0	0	0	0	1	0	0	0	1	2	0	0	1	4	0	0	0	0	0	0	0	0	1	1	1	1	0	0	0	4	1	0	1	0	1	1	0	2	2	0	2	3	0	0	1	3	0
B3GALNT2__chr1	2	1	1	0	0	1	3	0	2	0	3	4	2	0	1	1	0	1	1	1	0	0	1	0	0	2	2	2	1	5	3	4	3	2	3	2	2	3	3	3	2	3	3	3	0	0	1	1	3
B3GALT1__chr2	0	0	0	0	0	0	0	0	0	0	0	0	0	0	0	0	0	0	0	0	0	0	0	0	0	0	0	0	0	0	0	0	0	0	0	0	0	0	0	0	0	0	0	0	0	0	0	0	0
B3GALT2__chr1	0	0	0	0	0	0	0	0	0	0	0	0	0	0	0	0	0	0	0	0	0	0	0	0	0	0	0	0	0	0	0	0	0	0	0	0	0	0	0	0	0	0	0	0	0	0	0	0	0
B3GALT4__chr6	0	0	0	0	0	0	0	0	0	0	0	0	0	0	0	0	0	0	0	0	0	0	0	0	0	0	0	0	0	0	0	0	0	0	0	0	0	0	0	0	0	0	0	0	0	0	0	0	0
B3GALT5__chr21	0	0	0	0	0	0	0	0	0	0	0	0	0	0	0	0	0	0	0	0	0	0	0	0	0	0	0	0	0	0	0	0	0	0	0	0	0	0	0	0	0	0	0	0	0	0	0	0	0
B3GALT6__chr1	1	0	0	0	0	1	5	0	0	0	0	2	2	0	4	0	0	0	0	0	0	0	1	0	2	1	1	1	0	7.01	0	4	4	0	1	1	1	2	0	3	2	4	5	0	0	0	1	2	2
B3GALTL__chr13	0	0	0	3	0	4	2	2	0	0	1	2	1	0	0	1	0	0	0	1	2	0	1	0	1	1	0	1	0	2	0	1	4	0	5	1	3	5	0	3	1	1	1	0	0	0	1	0	0
B3GAT3__chr11	0	0	2	0	0	1	0	0	2	0	0	0	2	1	2	0	0	2	0	1	0	0	0	0	1	1	1	0	1	1	1	1	0	0	1	0	1	0	0	0	0	0	1	0	0	0	1	0	0
B3GNT1__chr11	0	1	0	1	0	1	0	0	0	0	0	2	2	1	1	4	0	0	1	0	1	0	0	0	0	1	1	2	1	0	1	4	2	0	1	1	0	1	1	0	1	3	1	2	0	0	0	0	2
B3GNT2__chr2	0	1	0	1	0	1	1	0	0	0	0	0	0	0	1	1	0	0	0	0	0	0	0	0	0	0	2	0	0	1	0	3	0	0	0	0	0	0	1	0	0	0	0	2	0	0	0	0	0
B3GNT3__chr19	0	0	0	0	0	0	0	0	0	1	0	0	0	0	0	0	0	0	0	0	0	0	0	0	0	0	0	0	0	0	0	0	0	0	0	0	0	0	0	0	0	0	0	0	0	0	0	0	0
B3GNT4__chr12	0	0	0	0	0	0	0	0	0	0	0	0	0	0	0	0	0	0	0	0	0	0	0	0	0	0	0	0	0	0	0	0	0	0	0	0	0	0	0	0	0	1	0	0	0	0	0	0	0
B3GNT5__chr3	2	1	1	0	0	1	0	0	3	0	0	2	1	0	0	0	0	0	0	0	0	0	2	0	0	0	1	1	1	3	0	0	0	0	1	0	0	1	0	0	0	3	4	1	0	0	0	0	0
B3GNT6__chr11	0	0	0	0	0	0	0	0	0	0	0	0	0	0	0	0	0	0	0	0	0	0	0	0	0	0	1	0	0	0	0	0	0	0	0	0	0	0	0	0	0	0	0	0	0	0	0	0	0
B3GNT7__chr2	0	0	0	0	0	0	0	0	0	0	0	0	0	0	1	0	0	0	0	0	0	0	0	0	0	0	0	0	0	0	0	0	0	0	0	0	0	0	0	0	0	0	0	0	0	0	0	0	0
B3GNT9__chr16	0	0	0	0	0	0	0	0	0	0	0	0	0	0	2	0	0	0	0	1	0	0	0	0	0	1	0	0	0	0	0	1	0	0	0	0	3	0	0	0	0	0	1	1	0	0	0	0	0
B3GNTL1__chr17	0	0	0	0	0	1	0	0	0	0	0	1	0	0	0	1	0	1	0	0	0	0	0	0	0	0	0	0	0	0	0	0	0	0	0	0	0	0	1	0	2	2	0	0	0	0	1	0	1
B4GALNT1__chr12	0	0	0	0	0	1	1	0	0	0	1	0	0	0	0	0	0	0	1	0	0	0	0	0	1	0	0	0	0	1	0	6	0	0	0	1	0	1	1	0	0	0	0	1	0	0	0	1	0
B4GALNT4__chr11	0	0	0	0	0	0	0	0	0	0	0	1	0	1	1	0	0	0	0	0	0	0	1	0	1	0	0	0	1	0	0	0	1	0	3	0	0	0	2	1	0	1	0	0	0	0	1	0	0
B4GALT1__chr9	0	1	4	1	0	1	1	2	7.01	0	1	5	1	0	1	3	0	2	2	0	1	0	0	0	0	1	2	7.01	2	5	1	2	2	2	1	4	6	3	6	7.01	3	5	4	1	0	0	4	0	7.01
B4GALT2__chr1	2	0	3	0	0	2	2	2	1	0	0	1	1	1	3	1	0	0	2	1	1	0	0	0	2	0	1	1	0	3	6	7.01	5	1	2	0	1	0	5	3	0	2	1	6	0	0	1	1	3
B4GALT3__chr1	1	1	1	0	0	1	2	2	2	0	1	0	1	0	0	6	0	1	1	0	0	0	1	0	0	1	1	2	0	1	2	2	0	0	2	1	2	3	4	3	0	4	3	4	0	0	2	0	2
B4GALT4__chr3	1	0	2	0	0	1	0	0	0	0	1	0	0	1	0	1	0	0	2	0	0	1	0	0	1	0	1	0	0	1	0	1	0	1	2	1	2	0	1	0	1	0	2	0	0	0	2	0	0
B4GALT5__chr20	2	2	7.01	3	0	7.01	7.01	3	7.01	0	1	8.01	1	4	4	8.01	0	2	4	1	1	0	3	0	1	2	8.01	1	1	7.01	6	9.01	9.01	1	8.01	1	4	2	6	7.01	6	9.01	5	5	0	1	1	6	2
B4GALT6__chr18	0	0	0	2	0	2	1	1	0	0	0	1	1	2	4	0	0	1	0	0	0	0	1	0	1	0	3	0	1	3	3	2	3	0	0	1	3	1	2	0	0	4	1	3	0	0	1	0	0
B4GALT7__chr5	0	0	0	0	0	3	2	1	0	0	0	2	0	0	3	1	0	0	0	1	0	0	0	0	1	0	0	0	1	1	0	2	2	0	1	1	2	1	1	0	0	1	0	0	0	0	0	0	0
B9D1__chr17	0	0	0	0	0	1	0	0	1	0	0	0	1	1	0	2	0	0	1	0	0	0	1	1	0	0	2	1	1	2	2	5	1	1	1	0	0	0	0	1	1	0	0	4	0	0	0	0	1
B9D2__chr19	0	0	1	0	0	0	1	0	0	0	0	0	0	0	0	0	0	0	0	0	0	0	1	0	1	0	0	0	1	1	1	0	1	0	0	0	0	0	0	1	0	0	1	0	0	0	0	0	1
BAALC__chr8	0	0	0	0	0	0	0	0	0	0	0	0	0	0	0	0	0	0	0	0	0	0	0	0	0	0	0	0	0	0	0	0	0	0	0	0	0	0	0	0	0	0	0	0	0	0	0	0	0
BAAT__chr9	0	0	0	0	0	0	0	0	0	0	0	0	0	0	0	0	0	0	0	0	0	0	0	0	1	0	0	0	0	0	1	0	1	0	1	0	1	1	0	0	0	0	0	0	0	0	0	0	0
BABAM1__chr19	2	3	8.01	0	0	3	6	1	6	0	8.01	9.01	0	2	3	6	0	6	6	9.01	1	0	4	0	5	2	6	4	7.01	12.02	8.01	4	14.02	1	7.01	4	4	4	8.01	12.02	3	5	10.01	13.02	1	0	1	2	4
BACE1-AS__chr11	0	0	0	0	0	0	0	0	0	0	0	0	0	0	0	0	0	0	0	0	0	0	0	0	0	0	0	0	0	0	0	0	0	0	0	0	0	0	0	0	0	0	0	0	0	0	0	0	0
BACE1__chr11	0	1	1	1	0	1	1	2	4	0	2	3	0	5	4	1	0	0	3	2	0	0	5	0	5	3	1	5	0	6	6	2	7.01	1	4	1	1	5	3	3	2	2	2	4	0	0	2	1	3
BACE2__chr21	4	1	5	0	0	1	6	5	7.01	0	3	6	11.01	8.01	10.01	2	0	4	5	1	2	0	3	3	6	5	7.01	1	2	7.01	5	10.01	4	3	11.01	1	3	5	1	5	6	16.03	5	18.04	1	0	1	7.01	1
BACH1__chr21	0	0	1	0	0	0	1	0	0	0	0	1	1	0	2	2	1	0	2	2	0	0	0	1	1	2	2	0	0	4	3	2	0	1	2	4	2	0	1	1	1	2	2	1	0	0	1	0	3
BACH2__chr6	0	0	0	0	0	0	0	0	0	0	0	0	0	0	0	0	0	0	0	0	0	0	0	0	0	0	0	0	0	0	0	0	0	0	0	0	0	0	0	0	0	0	0	0	0	0	0	0	0
BAD__chr11	0	1	2	0	0	3	1	0	1	0	1	3	0	1	5	1	0	2	1	0	0	0	0	0	4	2	4	1	1	2	4	5	4	0	5	2	2	3	4	2	0	2	3	2	0	0	1	2	1
BAG1__chr9	1	0	0	0	0	1	1	0	1	0	0	2	0	0	1	2	0	2	0	0	0	0	0	0	2	0	4	1	3	5	4	2	2	2	1	1	1	4	3	1	1	2	2	3	0	0	0	1	4
BAG2__chr6	5	0	0	0	1	6	4	3	2	0	1	6	2	2	6	2	0	2	1	0	2	0	0	0	6	1	4	1	5	17.03	5	4	4	2	9.01	4	12.02	0	12.02	5	1	5	3	6	0	0	5	2	3
BAG3__chr10	3	8.01	5	3	0	7.01	3	5	13.02	0	6	13.02	5	3	4	6	0	5	7.01	3	2	2	6	0	7.01	2	5	1	4	7.01	10.01	7.01	9.01	3	9.01	6	5	0	17.03	6	4	8.01	8.01	15.03	0	0	5	0	11.01
BAG4__chr8	0	1	3	0	0	0	0	0	0	0	0	2	1	0	0	2	0	2	0	1	0	0	0	0	1	0	4	0	0	6	1	0	0	0	1	1	2	0	4	1	0	2	0	4	0	0	0	0	1
BAG5__chr14	0	5	4	3	1	5	0	1	3	0	4	5	2	3	6	1	0	1	0	1	1	1	2	0	3	0	1	2	1	7.01	3	8.01	3	0	1	1	2	3	3	3	0	2	1	5	0	0	2	2	0
BAG6__chr6	0	0	2	1	0	4	1	1	5	0	2	4	1	2	6	1	0	5	3	5	0	0	1	0	1	5	7.01	2	2	2	4	3	7.01	1	3	3	3	2	11.01	8.01	2	1	3	7.01	0	0	2	1	4
BAGE__chr21	0	0	0	0	0	1	0	0	0	0	0	0	0	0	0	0	0	0	0	0	0	0	0	0	0	0	0	0	0	0	0	0	0	0	0	0	0	0	0	0	0	0	0	0	0	0	0	0	0
BAHCC1__chr17	0	0	2	0	0	0	0	1	0	0	0	1	0	0	2	0	0	3	0	0	0	0	0	0	0	0	1	0	0	0	1	0	1	0	1	0	0	0	1	0	0	1	0	0	0	0	0	0	1
BAHD1__chr15	2	1	5	0	0	1	0	0	2	0	1	4	0	2	1	1	0	0	4	0	0	0	0	1	6	2	3	1	1	2	0	5	2	0	1	2	3	1	1	1	1	1	1	1	0	0	1	1	2
BAI2__chr1	0	0	0	0	0	0	2	0	1	0	0	4	0	1	0	1	0	0	0	0	1	0	0	1	0	0	2	0	2	1	1	1	0	1	0	3	0	0	1	3	0	1	0	0	0	0	2	0	0
BAI3__chr6	0	0	0	0	0	0	0	0	0	0	0	0	0	0	0	0	0	0	0	0	0	0	0	0	0	0	0	0	0	0	0	0	0	1	0	0	0	0	0	0	0	0	0	0	0	0	0	0	0
BAIAP2-AS1__chr17	0	0	0	0	0	0	0	0	0	0	0	0	0	0	0	0	0	0	0	0	0	0	0	0	0	0	1	0	0	0	0	0	1	0	0	0	0	1	1	0	0	0	0	2	0	0	0	0	0
BAIAP2L1__chr7	2	0	2	0	0	0	0	0	0	0	0	0	1	1	2	0	0	0	0	0	0	0	0	0	2	0	1	0	0	2	1	0	0	0	0	2	3	1	2	0	0	0	1	2	0	0	0	1	0
BAIAP2__chr17	2	1	2	0	0	1	0	1	4	0	0	7.01	0	0	1	0	0	1	3	0	1	0	3	0	2	2	5	0	1	3	4	0	0	1	3	1	0	0	2	1	1	3	3	5	0	0	0	0	0
BAIAP3__chr16	0	0	0	0	0	0	0	0	0	0	0	0	0	0	0	0	0	1	0	0	0	0	0	0	0	0	0	0	0	0	0	0	0	0	0	0	0	0	0	0	0	0	0	0	0	0	0	0	0
BAK1__chr6	0	0	0	1	0	0	0	0	2	0	0	2	0	0	0	0	0	2	1	1	0	0	1	0	0	0	0	1	0	1	1	1	1	0	3	1	0	0	1	1	1	0	0	2	0	0	0	1	1
BAMBI__chr10	0	0	0	0	0	0	1	1	0	0	0	0	0	1	1	0	0	0	1	0	0	0	0	0	2	0	0	2	0	0	0	1	0	0	0	1	0	2	0	0	0	0	0	0	0	0	0	0	3
BANF1__chr11	5	6	7.01	6	0	5	13.02	1	11.01	0	4	17.03	1	8.01	13.02	5	0	3	1	7.01	2	1	4	2	7.01	9.01	13.02	11.01	8.01	22.06	9.01	22.06	20.05	6	7.01	6	14.02	7.01	12.02	5	5	11.01	10.01	6	0	0	7.01	5	11.01
BANK1__chr4	0	0	0	0	0	0	0	0	0	0	0	0	0	0	0	0	0	0	0	0	0	0	0	0	1	0	0	0	0	0	0	0	0	0	0	0	0	0	0	1	0	0	0	0	0	0	0	0	0
BANP__chr16	0	0	0	1	0	0	0	0	0	0	0	0	1	1	2	1	0	0	0	0	0	0	1	0	0	0	2	2	1	3	1	1	2	0	0	0	0	0	1	0	0	0	1	1	0	0	1	0	0
BAP1__chr3	0	3	1	0	0	0	3	0	1	0	0	1	0	1	3	3	0	3	1	2	1	1	1	0	3	3	0	0	0	0	3	4	0	0	4	3	2	0	2	7.01	0	0	0	4	0	0	0	1	0
BARD1__chr2	1	0	5	0	0	2	1	0	7.01	0	0	0	0	1	2	3	0	1	0	0	0	0	0	1	0	0	1	3	0	6	2	1	4	2	3	1	1	0	1	2	0	2	0	1	0	0	1	1	0
BASP1__chr5	14.02	9.01	16.03	7.01	0	14.02	17.03	5	20.05	0	14.02	33.13	8.01	11.01	29.1	15.03	1	9.01	7.01	9.01	10.01	3	12.02	5	18.04	11.01	17.03	15.03	9.01	44.23	38.17	34.14	43.22	7.01	17.03	14.02	33.13	13.02	36.15	20.05	16.03	28.09	11.01	30.11	1	0	14.02	17.03	18.04
BATF3__chr1	0	0	0	0	0	1	0	0	0	0	0	0	0	0	0	0	0	1	3	0	0	0	1	0	0	0	1	1	0	1	1	0	0	2	0	1	0	0	0	1	0	0	1	1	0	0	0	0	0
BAX__chr19	1	0	0	1	0	0	2	0	1	0	2	2	0	1	1	1	0	0	3	3	2	0	0	0	1	3	1	0	1	1	3	2	5	1	1	0	2	4	2	3	0	2	1	4	0	0	1	1	7.01
BAZ1A__chr14	1	7.01	5	3	0	2	4	7.01	8.01	1	3	8.01	1	4	15.03	5	0	9.01	4	0	2	0	7.01	1	6	6	11.01	10.01	3	5	12.02	5	9.01	4	9.01	6	7.01	5	8.01	10.01	4	8.01	7.01	9.01	0	0	0	1	5
BAZ1B__chr7	8.01	4	12.02	1	0	6	17.03	3	5	0	7.01	4	6	6	19.04	6	0	10.01	2	1	2	0	3	2	4	0	13.02	3	4	15.03	7.01	11.01	5	2	8.01	4	6	5	12.02	9.01	1	13.02	8.01	15.03	0	0	3	5	5
BAZ2A__chr12	1	0	4	1	0	1	2	0	1	0	1	4	2	1	4	2	0	2	5	1	1	0	2	0	2	3	2	4	1	3	2	5	2	1	2	7.01	3	3	7.01	3	1	3	6	5	0	0	1	3	1
BAZ2B__chr2	1	0	2	0	0	1	1	1	0	0	1	1	3	0	1	1	0	1	1	0	0	0	2	0	1	1	0	0	1	1	1	3	0	0	7.01	0	1	0	1	0	0	1	0	1	0	0	0	0	0
BBC3__chr19	0	0	0	0	0	0	0	0	0	0	0	0	0	0	0	0	0	0	0	0	0	0	0	0	1	1	0	0	0	0	0	0	0	0	0	0	0	0	0	0	0	0	0	0	0	0	0	0	1
BBIP1__chr10	0	0	0	0	0	1	2	0	0	0	1	2	0	0	0	0	0	0	0	0	1	0	0	0	0	0	0	0	0	5	0	0	2	2	0	1	0	1	0	0	1	2	1	2	0	0	0	1	0
BBOX1__chr11	0	0	0	0	0	0	0	0	0	0	0	0	0	0	0	0	0	0	0	0	0	0	0	0	0	0	0	0	0	0	0	0	0	0	0	0	0	0	0	0	0	0	0	0	0	0	0	0	0
BBS10__chr12	1	1	0	0	0	1	1	0	0	0	0	2	0	0	0	0	0	1	2	0	0	0	0	0	0	0	1	1	0	1	0	0	0	0	1	1	0	0	1	0	0	0	0	0	0	0	0	0	0
BBS12__chr4	0	0	0	0	0	0	0	0	0	0	0	1	0	0	0	0	0	1	0	0	0	0	0	0	0	0	0	0	0	0	0	0	0	0	0	0	0	0	0	0	0	0	0	0	0	0	0	0	0
BBS1__chr11	2	0	0	0	0	1	0	0	0	0	0	0	0	0	0	0	0	1	0	0	1	0	0	0	0	0	0	0	0	0	1	0	2	0	0	0	1	0	1	0	0	0	0	0	0	1	1	0	0
BBS2__chr16	0	1	0	0	0	0	2	1	0	0	0	1	0	0	0	2	0	0	0	0	0	0	0	0	0	1	0	1	0	0	1	0	2	0	0	0	1	2	2	0	1	0	1	1	0	0	0	0	0
BBS4__chr15	0	1	2	0	0	0	0	0	0	0	0	1	0	0	0	1	0	1	0	0	0	0	1	0	0	0	0	0	0	1	1	0	1	0	0	0	0	0	0	0	1	1	0	2	0	0	0	0	1
BBS5__chr2	0	1	0	0	0	0	0	0	1	0	0	1	0	0	1	1	0	2	0	0	0	0	0	0	1	0	0	0	0	0	0	0	0	0	1	0	0	0	0	1	0	0	0	0	0	0	0	0	0
BBS7__chr4	0	1	0	0	0	0	2	1	2	0	1	0	1	0	0	1	0	1	0	0	0	0	2	0	1	0	0	0	0	2	0	2	1	0	1	3	1	0	0	1	1	1	1	1	0	1	3	0	1
BBS9__chr7	0	0	0	2	0	0	0	0	1	0	0	0	0	0	0	0	0	0	1	1	0	0	0	0	0	0	0	0	0	2	2	2	0	0	0	0	0	1	0	0	1	0	0	0	0	0	0	0	1
BBX__chr3	1	3	7.01	1	0	3	18.04	1	6	0	1	9.01	2	3	22.06	7.01	0	3	9.01	3	2	0	5	2	6	5	3	6	2	6	14.02	6	30.11	5	11.01	4	5	4	8.01	13.02	2	14.02	4	12.02	0	0	6	2	5
BCAM__chr19	0	0	0	0	0	0	1	0	0	0	0	0	0	0	0	0	0	0	0	0	0	0	0	0	0	0	0	0	0	0	1	0	0	0	0	0	0	0	0	0	0	0	0	0	0	0	0	0	0
BCAN__chr1	0	0	0	0	0	0	0	0	0	0	0	0	0	0	0	0	0	0	0	0	0	0	0	0	0	0	0	0	0	0	0	0	0	0	0	0	0	0	0	0	0	0	0	0	0	0	0	0	0
BCAP29__chr7	5	1	2	4	0	7.01	2	1	6	0	4	11.01	2	0	10.01	7.01	0	3	1	3	1	0	6	1	3	2	4	7.01	7.01	13.02	17.03	10.01	3	4	13.02	4	9.01	6	7.01	16.03	4	10.01	4	12.02	0	1	7.01	5	3
BCAP31__chrX	11.01	12.02	13.02	0	0	9.01	12.02	3	7.01	0	7.01	14.02	4	9.01	9.01	10.01	0	5	6	5	4	2	2	1	11.01	10.01	9.01	6	6	16.03	10.01	18.04	16.03	5	14.02	12.02	6	10.01	24.07	16.03	5	14.02	9.01	22.06	0	1	2	3	10.01
BCAR1__chr16	0	3	0	0	0	1	4	5	3	0	3	1	0	0	5	4	0	3	1	0	2	1	2	0	1	2	3	2	2	2	3	3	4	0	4	3	8.01	1	8.01	3	1	6	4	3	0	0	1	1	2
BCAR3__chr1	2	1	7.01	0	0	3	4	1	5	0	3	11.01	3	1	7.01	6	0	3	2	3	0	1	3	4	0	1	6	9.01	3	15.03	11.01	8.01	5	6	5	9.01	13.02	4	20.05	12.02	4	6	6	6	1	0	5	8.01	15.03
BCAR4__chr16	0	0	0	0	0	0	0	0	0	0	0	0	0	0	0	0	0	0	0	0	0	0	0	0	0	0	0	0	0	0	0	0	0	0	0	0	0	0	0	0	0	0	0	0	0	0	0	0	0
BCAS1__chr20	1	0	0	0	0	0	0	0	0	0	0	0	0	0	0	0	0	0	0	0	0	0	0	0	0	0	0	1	0	0	0	0	0	0	0	0	0	0	0	0	0	0	0	0	0	0	0	0	0
BCAS2__chr1	2	1	1	0	0	1	2	0	3	0	3	3	0	1	2	1	0	2	0	0	0	0	2	1	2	4	2	2	1	7.01	1	5	2	2	6	3	4	0	4	2	2	2	2	3	0	0	3	1	4
BCAS3__chr17	0	0	0	0	0	1	0	0	0	0	0	0	0	1	0	1	0	1	0	0	0	0	0	0	0	0	0	0	0	0	1	0	0	0	1	0	2	0	0	0	0	0	0	0	0	0	0	0	1
BCAS4__chr20	0	1	0	0	0	0	0	0	2	0	0	0	1	0	1	1	0	1	1	1	0	0	0	0	2	0	0	0	0	0	1	2	0	0	1	0	0	1	1	1	0	2	0	0	0	0	0	0	0
BCAT1__chr12	13.02	19.04	16.03	16.03	0	23.06	18.04	9.01	29.1	0	18.04	84.86	14.02	20.05	58.41	21.05	0	26.08	8.01	19.04	17.03	0	15.03	10.01	23.06	30.11	31.11	32.12	20.05	66.53	49.29	20.05	33.13	14.02	41.2	18.04	32.12	12.02	65.51	62.47	32.12	25.07	29.1	24.07	1	2	14.02	8.01	52.33
BCAT2__chr19	0	1	0	0	0	2	1	0	0	0	0	3	0	0	0	0	1	0	0	0	0	0	0	0	1	1	0	0	0	1	2	0	2	1	1	2	1	2	1	4	0	3	2	0	0	0	1	1	0
BCCIP__chr10	5	3	8.01	2	0	7.01	7.01	9.01	11.01	0	3	10.01	2	9.01	16.03	7.01	0	10.01	7.01	6	1	1	8.01	2	8.01	4	18.04	7.01	2	21.05	17.03	12.02	11.01	4	6	11.01	7.01	4	10.01	12.02	8.01	5	9.01	16.03	0	1	11.01	8.01	7.01
BCDIN3D-AS1__chr12	0	0	0	0	0	0	0	0	0	0	0	0	0	0	0	0	0	0	0	0	0	0	0	0	0	0	0	0	0	0	0	0	0	1	0	0	1	0	0	0	0	0	0	0	0	0	0	0	0
BCDIN3D__chr12	0	1	0	0	0	0	1	0	0	0	0	0	0	1	0	0	0	0	0	0	0	0	0	0	0	0	0	0	0	1	0	0	0	0	0	1	0	0	0	1	0	0	0	0	0	0	0	0	0
BCHE__chr3	0	0	1	0	0	0	0	0	0	0	0	1	1	0	2	0	0	3	0	0	1	0	0	0	0	1	0	1	0	1	0	0	2	0	1	0	2	1	0	0	0	1	0	0	0	0	1	0	0
BCKDHA__chr19	0	0	0	0	0	0	2	0	3	0	1	0	0	1	3	2	0	0	0	2	0	1	1	0	2	3	0	1	2	0	2	0	1	0	0	3	2	1	0	3	0	0	2	0	0	0	0	0	1
BCKDHB__chr6	1	0	0	0	0	3	1	0	1	0	0	2	1	3	1	2	0	0	1	0	3	0	0	0	0	0	1	1	0	4	2	2	1	1	2	0	1	0	1	3	1	0	1	2	0	0	0	0	2
BCKDK__chr16	1	2	7.01	0	0	1	2	1	3	0	1	2	0	1	5	5	0	6	1	0	1	0	3	0	4	3	2	3	1	10.01	11.01	7.01	5	1	11.01	0	2	4	5	5	3	5	5	12.02	0	0	1	4	1
BCL10__chr1	1	0	5	1	0	2	4	0	1	0	1	2	0	0	0	1	0	3	1	1	0	0	0	1	0	1	1	2	0	1	3	0	1	3	2	0	2	1	0	2	0	2	4	1	0	0	3	1	2
BCL11A__chr2	0	0	0	0	0	0	0	0	0	0	0	0	0	0	0	0	0	0	0	0	0	0	0	0	0	0	0	0	0	0	0	0	0	0	0	0	0	0	0	0	0	0	0	0	0	0	0	0	0
BCL11B__chr14	0	0	0	0	0	0	0	0	0	0	0	0	0	0	0	0	0	0	0	0	0	0	0	0	0	0	0	0	0	0	0	0	0	0	0	0	0	0	0	0	0	0	0	1	0	0	0	0	0
BCL2A1__chr15	0	0	0	0	0	0	0	0	0	0	0	0	0	0	0	0	0	0	0	0	0	0	0	0	0	0	0	0	0	0	0	0	0	0	0	0	0	0	0	0	0	0	0	0	0	0	0	0	0
BCL2L11__chr2	0	0	0	0	0	1	0	0	0	0	0	1	0	0	0	0	0	0	3	0	0	0	0	0	0	0	1	0	0	0	0	0	1	0	0	0	0	0	0	0	0	0	0	0	0	0	0	0	0
BCL2L12__chr19	1	1	1	0	0	1	0	0	1	0	0	0	1	2	1	0	0	1	1	0	0	0	2	0	0	1	0	4	0	1	3	6	5	0	2	1	3	0	3	2	0	1	3	1	0	0	1	3	3
BCL2L13__chr22	0	4	1	0	0	2	5	1	2	0	1	4	0	1	2	0	0	1	3	0	0	0	1	0	4	3	2	1	2	4	2	5	1	0	2	1	3	4	6	2	6	3	1	8.01	1	0	1	4	7.01
BCL2L15__chr1	0	0	0	0	0	0	0	0	0	0	0	0	0	0	0	0	0	0	0	0	0	0	0	0	0	0	0	0	0	0	0	0	0	0	0	0	0	0	0	0	0	0	0	0	0	0	0	0	0
BCL2L1__chr20	5	6	1	0	0	6	4	6	7.01	0	3	5	3	4	10.01	3	0	5	5	1	1	0	0	2	4	3	2	2	3	14.02	9.01	13.02	18.04	1	15.03	3	3	4	13.02	14.02	4	6	7.01	15.03	0	0	2	5	4
BCL2L2__chr14	0	0	0	0	0	0	0	1	1	0	0	0	0	0	0	0	0	1	0	0	0	0	0	1	0	0	1	0	0	2	1	3	0	0	2	1	0	0	0	1	0	0	0	0	0	1	0	0	0
BCL2__chr18	0	0	0	1	0	4	1	0	1	0	0	0	0	3	1	0	0	0	0	0	0	0	0	0	1	0	2	2	1	1	1	0	1	0	0	1	0	2	0	0	0	1	2	1	0	0	0	0	1
BCL3__chr19	0	3	1	0	0	0	0	0	0	0	0	1	1	0	2	0	0	0	0	0	0	0	1	0	1	6	2	0	1	2	1	1	1	0	2	0	4	0	3	1	1	0	0	0	0	0	1	0	0
BCL6B__chr17	0	0	0	0	0	0	0	0	0	0	0	0	0	0	0	0	0	0	0	0	0	0	0	0	0	0	0	0	0	0	0	0	0	0	0	0	0	0	0	0	0	0	0	0	0	0	0	0	0
BCL6__chr3	0	1	0	0	0	0	0	0	2	0	0	2	0	0	3	0	0	0	2	0	0	0	0	0	0	0	0	0	0	0	3	0	1	0	0	0	0	1	2	1	0	0	3	0	0	0	0	0	1
BCL7A__chr12	0	2	0	0	0	1	1	0	0	0	1	0	0	0	2	2	0	2	1	0	0	0	0	1	2	0	2	0	0	3	0	2	3	1	1	1	0	3	5	1	0	1	2	1	0	0	0	0	0
BCL7B__chr7	0	3	1	2	0	3	3	0	2	0	2	2	3	4	5	1	0	4	1	3	0	0	3	1	5	3	5	0	1	6	12.02	6	4	1	7.01	5	5	2	4	6	2	3	7.01	5	0	0	3	5	1
BCL7C__chr16	2	0	1	0	0	3	0	0	5	0	1	3	0	2	4	2	0	2	0	0	0	0	0	0	2	2	2	0	0	3	6	2	6	0	0	2	2	1	5	1	0	2	0	2	0	0	0	1	1
BCL9L__chr11	1	2	0	1	0	2	1	0	3	0	2	2	1	4	3	5	0	3	1	1	0	0	0	0	0	0	2	2	0	4	1	2	5	1	2	0	0	2	3	4	1	2	0	3	0	0	0	1	4
BCL9__chr1	0	0	0	1	0	0	0	2	1	0	1	3	0	1	1	5	0	0	0	0	0	0	1	0	1	0	0	0	0	0	2	0	0	0	1	1	0	0	3	1	0	0	0	0	0	0	0	0	1
BCLAF1__chr6	8.01	10.01	18.04	2	1	12.02	19.04	6	15.03	0	8.01	26.08	6	22.06	13.02	18.04	0	10.01	10.01	3	1	1	13.02	3	19.04	9.01	14.02	13.02	9.01	21.05	18.04	17.03	18.04	4	18.04	15.03	15.03	16.03	25.07	22.06	9.01	21.05	15.03	24.07	0	0	12.02	9.01	12.02
BCMO1__chr16	0	0	0	0	0	0	0	0	0	0	0	0	0	0	0	0	0	0	0	0	0	0	0	0	0	0	0	0	0	0	0	0	0	0	0	0	0	0	0	0	0	0	0	0	0	0	0	0	0
BCO2__chr11	0	0	0	0	0	0	0	0	0	0	0	0	0	0	0	0	0	0	0	1	0	0	0	0	0	0	0	0	0	0	0	0	0	0	0	0	0	0	0	0	0	0	0	0	0	0	0	0	0
BCORL1__chrX	0	1	0	0	0	0	0	0	2	0	0	1	0	0	1	1	0	0	0	0	0	0	1	1	1	1	0	0	0	0	1	2	2	0	2	0	0	0	2	1	0	1	1	0	0	0	0	0	0
BCOR__chrX	0	2	1	0	0	0	0	0	1	0	1	0	0	0	2	2	0	1	0	0	0	0	2	0	0	0	3	1	1	2	1	0	1	0	2	0	0	1	3	1	0	0	1	0	0	0	0	2	0
BCR__chr22	0	0	1	0	0	0	1	0	0	0	0	0	0	1	0	0	0	0	0	0	0	0	0	0	0	0	0	0	0	1	0	1	0	0	1	1	1	0	0	1	0	1	0	0	0	0	1	0	0
BCS1L__chr2	1	2	1	0	0	3	3	0	3	0	0	1	0	2	2	1	0	1	0	0	0	0	0	1	1	0	1	4	0	6	5	5	1	0	4	2	2	1	8.01	3	2	2	3	2	0	0	0	2	1
BCYRN1__chrX	0	3	1	3	0	0	1	0	0	0	2	9.01	1	0	0	0	1	2	2	2	0	0	2	3	1	2	1	3	2	3	4	4	14.02	0	4	11.01	2	3	3	1	3	0	5	5	0	0	1	0	5
BDH1__chr3	0	2	0	0	0	0	1	0	0	0	3	1	0	1	0	1	0	0	2	0	0	0	1	0	0	0	0	0	0	0	1	2	1	0	0	0	0	0	1	0	0	1	2	1	0	0	0	0	0
BDH2__chr4	0	1	2	0	0	0	0	0	1	0	1	4	0	0	1	0	0	1	0	2	1	0	0	0	1	1	1	0	0	3	0	1	0	1	3	2	0	1	0	0	1	0	0	1	0	0	1	0	2
BDNF-AS__chr11	0	0	0	0	0	0	0	0	0	0	0	0	0	0	0	0	0	0	0	0	0	0	0	0	0	0	0	0	0	0	0	0	0	0	0	0	0	0	1	0	0	0	0	0	0	0	0	0	0
BDNF__chr11	0	2	3	2	0	2	1	0	0	0	0	1	1	0	0	1	0	0	0	0	1	0	0	0	2	0	1	1	0	3	7.01	4	2	1	0	0	0	2	0	4	1	4	2	2	0	0	1	1	2
BDP1__chr5	0	0	3	1	0	4	1	4	4	0	0	4	2	4	3	1	0	1	2	0	0	0	3	0	4	2	0	2	2	0	1	4	5	2	2	1	2	5	8.01	5	1	2	1	14.02	0	0	1	0	0
BECN1__chr17	0	0	0	0	0	0	1	0	0	1	0	0	0	0	1	0	0	0	0	0	0	0	0	0	0	0	1	0	0	1	0	0	0	1	0	0	1	0	0	0	0	0	0	0	0	0	0	0	0
BEND2__chrX	0	0	0	0	0	0	0	0	0	0	0	0	0	0	0	0	0	0	0	0	0	0	0	0	0	0	0	0	0	0	0	0	0	0	0	0	0	0	0	0	0	0	0	0	0	0	0	0	0
BEND3P3__chr10	0	0	0	0	0	0	0	0	0	0	0	0	0	0	0	0	0	0	0	0	0	0	0	0	0	0	0	0	0	0	0	0	0	0	0	0	1	0	0	0	0	0	0	0	0	0	0	0	0
BEND3__chr6	0	0	0	0	0	0	0	0	0	0	0	0	0	0	1	0	0	0	0	2	0	0	0	0	0	0	0	2	1	2	0	0	1	0	0	0	0	0	0	0	0	0	1	1	0	0	0	0	0
BEND4__chr4	0	0	0	0	0	0	0	1	2	0	0	0	0	0	0	0	0	0	0	0	0	0	2	0	0	2	0	0	0	0	0	2	0	0	0	1	0	0	0	1	0	0	0	0	0	0	0	0	0
BEND6__chr6	0	1	1	0	0	0	0	0	0	0	0	0	0	2	3	0	0	0	0	1	0	0	0	1	0	0	0	1	0	0	0	1	0	0	1	0	1	0	0	0	0	0	2	0	0	0	0	1	1
BEND7__chr10	0	0	0	0	0	1	0	0	1	0	1	2	2	0	2	0	0	0	0	1	0	0	0	0	0	0	0	0	0	0	2	1	4	0	3	2	0	1	0	3	0	1	1	0	0	0	0	0	1
BEST3__chr12	0	0	0	0	0	0	0	0	0	0	0	0	0	0	0	0	0	0	0	0	0	0	0	0	0	0	0	0	0	0	0	0	0	0	0	0	0	0	0	0	0	0	0	0	0	0	0	0	0
BEST4__chr1	0	0	0	0	0	0	0	0	0	0	0	0	0	0	0	0	0	0	0	0	0	0	0	0	0	0	0	0	0	0	0	0	0	0	0	0	0	0	0	0	0	0	0	0	0	0	0	0	1
BET1L__chr11	0	0	4	0	0	0	0	0	2	0	0	2	3	1	4	2	0	1	2	1	0	0	1	0	4	4	0	0	3	2	1	6	7.01	0	1	2	2	1	3	0	1	6	1	2	0	0	0	3	1
BET1__chr7	0	0	1	0	0	0	2	1	0	0	2	5	1	1	0	1	0	0	0	0	2	0	0	0	0	1	1	3	0	4	5	2	0	0	4	3	2	0	2	2	1	1	1	0	0	0	2	0	2
BEX1__chrX	4	7.01	15.03	4	0	4	11.01	5	18.04	0	10.01	43.22	6	7.01	17.03	6	0	13.02	13.02	1	5	0	10.01	4	15.03	8.01	33.13	15.03	20.05	28.09	16.03	17.03	26.08	7.01	11.01	16.03	24.07	7.01	19.04	30.11	11.01	12.02	14.02	24.07	1	0	15.03	9.01	20.05
BEX2__chrX	0	0	1	0	0	0	0	0	0	0	0	0	0	0	1	0	0	0	0	0	0	0	0	0	0	0	0	0	0	0	1	0	0	0	2	0	0	0	0	0	0	0	0	0	0	0	0	0	0
BEX4__chrX	0	0	0	0	0	0	3	0	0	0	0	1	0	0	1	0	0	0	2	0	0	0	0	0	0	0	0	0	0	0	0	0	0	0	0	0	0	0	1	0	0	1	0	1	0	0	0	0	3
BEX5__chrX	0	0	0	0	0	0	0	0	0	0	0	0	0	0	0	0	0	0	0	0	0	0	0	0	0	0	0	0	0	0	0	0	0	0	0	0	0	0	0	0	0	0	0	0	0	0	0	0	0
BFAR__chr16	1	3	3	1	0	4	2	2	4	0	0	6	2	1	3	4	0	2	4	1	0	0	5	0	0	2	4	3	0	7.01	4	4	4	0	3	10.01	4	4	6	4	3	2	2	4	0	0	3	0	2
BFSP1__chr20	0	0	0	0	0	0	0	0	0	0	0	0	1	0	0	0	0	0	0	0	0	0	0	0	0	0	0	0	0	0	0	0	0	0	0	0	0	0	0	0	0	0	0	0	0	0	0	0	0
BGN__chrX	4	3	0	0	1	3	1	2	8.01	0	0	2	0	2	6	8.01	0	0	4	0	1	0	7.01	0	7.01	2	3	0	0	5	2	1	0	0	0	0	9.01	0	19.04	16.03	1	1	1	0	0	0	0	0	1
BHLHB9__chrX	0	0	2	0	0	0	0	0	0	0	0	0	0	0	2	0	0	0	0	0	0	0	1	0	0	0	0	0	0	1	0	0	0	0	1	1	0	0	1	0	0	0	0	0	0	0	0	0	0
BHLHE40-AS1__chr3	0	0	0	0	0	0	0	0	0	0	0	0	0	0	0	0	0	0	0	0	0	0	0	0	0	0	0	0	0	0	0	0	0	0	0	0	0	0	0	0	0	0	0	0	0	0	0	0	0
BHLHE40__chr3	0	0	0	0	0	0	0	0	0	0	0	0	0	0	1	0	0	0	1	0	0	0	0	0	1	0	1	1	0	1	0	0	0	0	1	0	0	0	3	1	0	0	0	0	0	0	1	0	1
BHLHE41__chr12	0	0	0	0	0	0	1	0	0	0	0	3	0	0	3	1	0	0	1	0	0	0	1	0	0	6	2	1	0	3	2	0	0	1	4	1	0	1	0	0	0	1	0	0	0	0	0	0	2
BHMT2__chr5	0	0	1	0	0	0	0	0	0	0	2	1	0	2	2	0	0	1	0	0	0	0	0	0	1	1	1	2	0	3	2	1	1	0	0	1	0	0	0	1	0	1	0	1	0	0	1	0	3
BICC1__chr10	0	0	0	0	0	0	0	0	0	0	0	0	0	0	1	0	0	0	0	0	0	0	0	0	0	0	0	0	0	0	0	0	0	0	0	0	0	0	0	0	0	0	0	0	0	0	0	0	0
BICD1__chr12	2	0	1	0	0	1	2	0	0	0	0	1	1	0	3	4	0	0	0	0	0	0	0	1	0	2	1	0	2	0	3	0	1	0	1	0	2	1	1	0	0	2	0	0	0	0	0	1	2
BICD2__chr9	2	3	3	0	0	2	3	1	1	0	2	1	1	3	9.01	1	1	4	1	4	1	0	3	0	3	0	2	1	1	2	9.01	8.01	5	1	0	0	2	0	3	2	2	4	8.01	7.01	0	0	1	2	1
BID__chr22	2	1	0	1	0	2	4	0	2	0	0	2	1	4	1	3	0	2	0	1	2	0	3	0	2	1	0	2	1	8.01	2	1	2	0	5	2	0	1	4	2	2	1	1	4	0	0	1	2	2
BIK__chr22	0	0	0	0	0	0	0	0	0	0	0	0	0	0	0	0	0	0	0	0	0	0	0	0	0	0	1	0	0	0	0	0	0	0	0	0	0	0	0	0	0	0	0	0	0	0	0	0	0
BIN1__chr2	3	1	2	1	0	2	7.01	1	1	0	1	4	1	3	2	6	0	3	4	2	0	0	2	0	9.01	7.01	3	1	1	9.01	10.01	3	6	1	8.01	0	8.01	1	5	7.01	4	2	3	13.02	0	0	2	4	2
BIN3__chr8	1	0	2	0	0	1	0	0	0	0	1	1	0	1	1	0	0	0	0	0	1	0	0	0	3	1	1	3	0	1	2	1	2	2	0	0	0	2	1	2	0	0	4	0	0	0	1	1	0
BIRC2__chr11	4	5	19.04	4	0	5	5	3	9.01	0	2	7.01	3	4	1	2	0	7.01	6	2	2	1	3	1	3	2	2	3	2	11.01	16.03	13.02	8.01	4	11.01	7.01	2	0	18.04	9.01	7.01	9.01	10.01	7.01	2	0	6	8.01	12.02
BIRC3__chr11	0	0	2	0	0	0	0	0	0	0	0	0	0	0	0	2	0	0	1	0	0	0	2	0	0	0	0	0	0	0	0	4	1	0	0	1	1	0	11.01	0	0	0	0	0	0	0	0	0	0
BIRC5__chr17	1	10.01	11.01	1	0	5	3	1	10.01	0	14.02	7.01	3	2	2	13.02	0	3	6	2	3	0	3	2	4	3	3	4	4	14.02	7.01	12.02	12.02	0	10.01	8.01	7.01	8.01	13.02	8.01	8.01	10.01	7.01	10.01	0	0	4	6	5
BIRC6__chr2	1	2	5	7.01	0	1	5	0	0	0	4	6	3	3	6	5	0	3	3	1	0	0	1	0	4	1	2	7.01	2	2	8.01	3	5	1	1	1	3	5	3	5	2	7.01	6	5	1	0	2	0	3
BIVM-ERCC5__chr13	0	0	0	0	0	0	0	0	0	0	0	0	0	0	0	1	0	0	0	0	0	0	0	0	0	0	0	0	0	0	0	0	0	0	0	0	0	0	0	0	0	0	0	0	0	0	0	0	0
BIVM__chr13	0	0	0	0	0	0	1	0	0	0	0	0	1	0	1	2	0	2	1	1	0	0	1	0	2	0	0	2	0	7.01	3	3	1	3	0	2	2	1	6	1	0	2	2	4	0	0	0	2	0
BLCAP__chr20	0	0	0	1	0	0	3	0	3	0	0	2	2	0	6	4	0	1	1	0	1	0	0	0	3	1	3	0	0	3	2	0	3	2	3	2	3	1	5	3	1	3	7.01	3	0	0	0	3	5
BLID__chr11	0	1	0	0	0	0	0	0	0	0	0	0	0	1	1	0	0	0	0	0	0	0	0	0	1	0	0	0	0	0	0	0	0	0	0	0	0	0	0	1	0	0	0	0	0	0	0	0	0
BLMH__chr17	0	1	3	0	0	3	0	0	0	0	0	0	1	4	3	3	0	1	2	1	0	0	2	1	5	1	0	1	0	5	10.01	7.01	2	2	7.01	3	3	1	7.01	5	0	2	2	5	0	0	1	0	0
BLM__chr15	0	1	0	0	0	0	3	0	0	0	0	3	1	0	4	1	0	1	0	0	0	0	2	0	2	0	0	0	0	1	0	1	1	0	0	0	1	0	2	0	0	1	0	0	0	0	1	0	0
BLOC1S1-RDH5__chr12	1	2	0	1	0	0	0	0	1	0	1	5	1	0	2	0	0	3	2	0	1	0	0	0	1	1	1	1	1	0	0	5	5	1	2	0	1	1	2	0	0	2	0	0	0	0	0	0	0
BLOC1S1__chr12	1	2	1	0	0	1	0	1	2	0	2	6	1	2	2	0	0	3	0	2	0	0	1	1	3	6	4	4	0	1	4	4	3	0	4	5	3	1	1	5	0	2	2	3	0	0	2	0	2
BLOC1S2__chr10	1	2	4	2	0	6	6	4	7.01	0	3	13.02	0	5	5	5	0	3	11.01	0	2	0	3	0	6	4	5	7.01	1	7.01	14.02	6	3	1	7.01	5	6	6	7.01	6	7.01	3	9.01	7.01	0	0	5	5	7.01
BLOC1S3__chr19	0	0	1	0	0	1	1	0	0	0	0	0	1	0	0	2	0	0	0	0	0	0	1	0	0	3	0	0	0	1	0	2	1	1	2	0	0	0	1	1	0	0	0	1	0	0	0	0	1
BLOC1S4__chr4	0	1	0	0	0	0	1	0	0	0	0	2	0	0	1	0	0	2	5	0	0	0	0	0	0	0	0	0	0	4	2	1	0	0	0	0	3	0	1	0	0	1	2	3	0	0	1	1	1
BLOC1S6__chr15	3	5	5	3	0	3	9.01	9.01	6	0	4	8.01	1	2	12.02	5	0	3	2	2	1	0	0	2	3	5	4	7.01	3	17.03	7.01	5	13.02	3	6	3	3	3	6	9.01	4	5	2	10.01	0	0	5	6	6
BLVRA__chr7	1	3	1	1	0	2	5	0	1	0	1	3	0	2	4	4	0	1	0	1	0	0	2	0	2	0	2	0	0	2	4	1	3	0	3	5	0	1	4	3	1	1	1	1	0	0	0	0	2
BLVRB__chr19	0	1	1	0	0	2	2	0	1	0	0	1	0	0	4	2	0	0	1	0	0	0	0	0	0	0	1	1	0	1	1	1	4	0	0	0	0	0	1	0	0	0	0	1	0	0	0	1	1
BLZF1__chr1	0	0	1	1	0	0	0	0	0	0	0	3	0	0	0	2	0	1	0	0	0	0	0	0	0	0	0	0	0	0	1	0	1	0	0	2	1	1	2	0	0	0	0	1	1	0	1	0	0
BMF__chr15	0	0	0	0	0	0	0	0	0	0	0	0	0	1	0	0	0	0	2	0	0	0	0	0	0	2	0	0	0	0	0	0	0	0	1	0	0	0	0	0	0	0	0	0	0	0	0	0	0
BMI1__chr10	0	0	0	0	0	0	0	0	0	0	0	0	0	0	0	0	0	0	0	0	0	0	0	0	0	0	0	0	0	0	0	0	0	0	0	0	0	0	0	0	0	0	0	0	0	0	0	0	0
BMP1__chr8	0	1	0	0	0	0	1	2	5	0	0	2	1	1	1	4	0	0	6	2	0	1	0	1	2	2	3	1	1	3	2	2	4	0	1	0	4	1	6	3	1	4	0	6	0	0	0	2	2
BMP2K__chr4	0	0	0	0	0	0	0	0	0	0	0	1	0	0	0	0	0	1	0	0	0	0	1	0	0	1	1	0	0	0	0	0	0	0	2	0	0	0	0	1	0	0	0	1	0	0	1	1	0
BMP2__chr20	0	0	0	0	0	0	0	0	0	0	0	0	2	0	0	0	0	0	0	0	0	0	0	0	0	0	0	0	0	0	4	0	0	0	0	0	0	0	0	0	0	0	0	0	0	0	0	0	0
BMP3__chr4	0	0	0	0	0	0	0	0	0	0	0	0	0	0	0	0	0	0	0	0	0	0	0	0	0	0	0	0	0	0	0	0	1	0	0	0	0	0	0	0	0	0	0	0	0	0	0	0	0
BMP4__chr14	1	0	1	0	0	0	0	0	1	0	0	6	0	3	1	1	0	1	1	1	0	0	0	0	3	0	0	0	0	7.01	5	15.03	14.02	0	4	0	0	0	0	0	1	1	4	2	0	0	2	4	6
BMP6__chr6	0	0	0	0	0	0	0	0	0	0	0	0	0	0	0	0	0	0	0	0	0	0	0	0	0	0	0	0	0	0	0	0	0	0	0	0	1	0	0	0	0	0	0	0	0	0	0	0	0
BMP7__chr20	0	0	0	0	0	0	0	0	0	0	1	0	0	0	0	0	0	0	0	0	0	0	0	0	0	0	0	0	0	0	0	0	0	0	0	0	0	0	0	0	0	0	0	0	0	0	0	0	0
BMP8A__chr1	0	0	0	0	0	0	0	0	0	0	0	0	0	0	0	0	0	0	0	0	0	0	0	0	0	0	0	0	0	0	0	0	0	0	0	0	0	0	0	0	0	0	0	0	0	0	0	0	0
BMP8B__chr1	0	0	0	0	0	0	0	0	0	0	0	0	0	0	0	0	0	0	0	0	0	0	0	0	0	0	0	0	0	0	0	0	0	0	0	0	0	0	0	0	0	0	0	0	0	0	0	0	0
BMPER__chr7	0	1	0	0	0	0	0	0	0	0	0	0	1	0	1	0	0	0	0	2	0	0	0	0	0	0	1	0	0	0	0	0	1	0	0	0	0	0	0	0	0	1	0	0	0	0	0	0	1
BMPR1A__chr10	0	2	0	2	0	1	2	0	2	0	0	1	0	1	4	4	0	1	2	2	2	0	1	2	5	1	2	2	2	5	5	1	4	0	0	2	4	3	3	1	1	7.01	1	2	0	0	1	0	1
BMPR1B__chr4	0	0	0	0	0	0	0	0	0	0	0	1	0	0	0	0	0	0	0	0	0	0	0	0	0	0	1	0	0	0	0	0	0	0	0	0	0	0	0	0	0	0	0	0	0	0	0	0	0
BMPR2__chr2	1	5	2	0	0	3	2	2	7.01	0	2	6	1	2	7.01	1	0	5	3	2	1	0	2	3	2	4	4	4	1	8.01	3	2	7.01	3	8.01	1	4	4	2	3	5	3	2	5	0	1	4	3	0
BMS1P4__chr10	0	0	0	0	0	0	0	0	0	0	0	0	0	0	1	0	0	0	0	0	0	0	0	0	0	0	0	0	0	0	0	0	0	0	0	0	0	0	0	0	0	0	0	0	0	0	0	0	0
BMS1__chr10	1	1	5	0	0	1	3	1	4	0	0	5	1	6	3	5	1	1	3	5	0	0	2	0	2	0	3	1	2	6	3	5	2	0	1	2	4	2	5	2	1	3	4	8.01	0	0	2	0	1
BMX__chrX	0	0	0	0	0	0	0	0	0	0	0	0	0	0	0	0	0	0	0	0	0	0	0	0	0	0	0	0	0	0	0	0	0	0	0	0	0	0	0	0	0	0	0	0	0	0	0	0	0
BNC1__chr15	0	0	0	0	0	0	0	1	0	0	0	0	2	0	0	0	0	0	1	1	0	0	0	1	0	0	0	2	0	1	0	0	1	2	0	0	1	1	0	0	1	1	0	0	0	0	0	0	0
BNC2__chr9	1	2	1	0	0	0	2	3	6	0	1	9.01	2	1	1	2	0	0	3	2	0	0	4	0	3	3	2	4	1	13.02	3	0	4	1	4	1	1	3	3	2	2	8.01	1	7.01	0	0	1	0	3
BNIP1__chr5	0	0	0	0	0	0	1	0	0	0	0	0	0	0	1	0	0	2	0	0	0	0	1	0	2	0	0	0	0	2	2	0	2	1	0	0	0	0	0	2	0	1	1	1	0	0	0	0	0
BNIP2__chr15	1	3	2	3	0	2	2	1	1	0	1	7.01	1	4	3	1	0	4	0	2	0	0	1	1	2	2	4	1	3	10.01	3	0	2	2	7.01	3	2	3	5	3	0	6	2	9.01	0	0	5	2	1
BNIP3L__chr8	6	3	9.01	3	1	3	5	2	8.01	0	3	15.03	4	4	19.04	4	0	8.01	8.01	0	0	0	5	2	2	6	7.01	4	4	6	9.01	14.02	12.02	7.01	12.02	5	14.02	5	13.02	8.01	3	6	1	6	0	0	4	4	13.02
BNIP3__chr10	2	3	6	5	0	5	5	0	4	1	7.01	19.04	5	10.01	11.01	6	0	6	9.01	2	2	1	2	1	2	1	4	2	2	15.03	8.01	11.01	12.02	4	11.01	7.01	2	3	10.01	14.02	8.01	7.01	7.01	13.02	1	0	5	1	8.01
BNIPL__chr1	0	0	0	0	0	0	0	0	0	0	0	0	0	0	0	0	0	0	0	1	0	0	0	0	0	0	0	0	0	0	0	0	0	0	0	0	0	0	0	1	0	0	0	0	0	0	0	0	0
BOC__chr3	0	0	0	0	0	0	0	0	0	0	0	0	0	0	0	0	0	0	0	0	0	0	0	0	0	0	0	0	0	0	0	0	0	0	0	0	0	2	0	0	0	0	0	0	0	0	0	0	1
BOD1L1__chr4	3	0	3	2	1	5	4	2	4	0	1	8.01	4	3	4	6	0	4	3	1	2	0	1	2	0	1	1	1	0	1	9.01	6	3	0	8.01	2	3	3	4	5	2	7.01	4	4	0	0	2	2	2
BOD1__chr5	0	0	0	0	0	0	0	0	1	0	1	0	0	3	1	2	0	2	3	0	0	0	0	0	0	1	1	1	0	4	3	2	1	2	1	1	2	0	0	1	1	1	2	2	0	0	1	0	1
BOK-AS1__chr2	0	0	0	0	0	0	0	0	0	0	0	0	0	0	0	0	0	0	0	0	0	0	0	0	0	0	0	0	0	0	0	0	0	0	0	0	0	0	0	0	0	0	0	0	0	0	0	0	0
BOK__chr2	1	1	1	2	0	1	2	1	2	0	0	2	0	0	2	1	0	0	2	1	1	0	1	0	2	1	2	0	0	6	5	4	8.01	0	0	1	1	0	5	9.01	0	2	1	3	0	0	1	1	1
BOLA1__chr1	0	0	0	0	0	0	0	0	1	0	0	0	0	0	0	0	0	0	0	0	0	0	1	0	1	0	1	0	0	1	0	0	2	0	2	0	0	0	0	1	0	0	0	3	0	0	0	1	1
BOLA3-AS1__chr2	0	0	0	0	0	0	0	0	0	0	1	0	0	0	0	0	0	0	0	0	0	0	0	0	0	0	0	1	0	0	0	1	0	0	0	0	0	0	0	0	0	1	0	3	0	0	0	0	0
BOLA3__chr2	2	4	2	2	0	4	3	1	3	0	8.01	11.01	1	3	6	1	0	4	0	6	3	1	3	3	2	0	2	3	3	13.02	3	2	10.01	3	4	10.01	5	2	3	8.01	3	8.01	5	8.01	0	0	2	8.01	5
BOP1__chr8	2	1	0	1	0	2	2	0	5	0	1	1	0	2	2	2	0	4	1	3	0	0	1	0	8.01	2	2	1	0	3	7.01	4	9.01	0	4	1	1	3	9.01	8.01	0	4	5	6	1	0	0	1	2
BORA__chr13	0	0	2	0	0	0	1	0	0	0	0	0	1	0	0	2	0	0	0	0	0	0	0	0	0	0	0	0	0	0	1	2	0	1	0	0	2	0	1	0	2	1	1	0	0	0	0	0	0
BPGM__chr7	1	1	1	1	0	1	1	1	1	0	0	3	0	0	1	2	0	2	0	0	0	0	0	1	0	1	1	0	1	2	0	1	0	0	4	1	3	0	1	0	3	0	0	2	0	0	0	0	0
BPHL__chr6	1	1	0	0	0	0	0	0	2	0	3	2	0	0	1	0	0	0	0	1	1	0	1	0	0	0	0	0	0	3	1	1	0	0	1	4	3	0	3	0	1	0	1	1	0	0	0	0	0
BPNT1__chr1	0	1	0	0	0	1	0	1	0	0	0	1	0	1	0	0	0	0	1	0	0	0	0	0	0	0	0	2	1	1	0	0	1	0	0	1	0	0	0	1	0	0	1	0	0	0	0	0	1
BPTF__chr17	3	12.02	6	3	0	4	8.01	1	13.02	0	1	10.01	2	6	4	11.01	0	13.02	9.01	2	0	0	1	1	7.01	6	5	4	1	2	19.04	11.01	5	2	18.04	8.01	9.01	7.01	10.01	6	6	10.01	4	11.01	0	1	4	2	3
BRAF__chr7	0	0	0	0	0	0	0	0	0	0	0	0	0	0	0	0	0	0	0	1	0	0	0	0	0	0	0	0	0	0	0	1	0	0	0	0	0	0	0	0	1	0	0	0	0	0	0	0	0
BRAP__chr12	0	0	0	0	0	2	0	1	2	1	0	3	1	1	0	0	1	2	1	0	2	0	2	0	1	0	2	0	0	2	2	1	0	0	2	2	3	1	6	2	0	1	1	1	0	0	0	1	0
BRAT1__chr7	0	0	0	0	0	2	1	0	1	0	2	1	0	0	0	0	0	0	0	0	0	0	0	0	1	0	0	0	1	3	2	0	3	0	0	1	0	0	1	1	0	0	0	1	0	0	0	1	0
BRCA1__chr17	1	3	7.01	0	0	6	12.02	2	12.02	0	0	10.01	5	5	5	3	0	6	0	0	0	0	4	1	7.01	1	2	5	5	10.01	7.01	9.01	7.01	2	8.01	2	5	5	10.01	5	4	5	3	6	0	0	0	2	1
BRCA2__chr13	0	1	0	0	0	1	0	0	2	0	4	3	1	3	5	1	0	0	0	0	0	0	3	0	5	0	1	2	0	0	8.01	0	1	0	4	0	3	7.01	7.01	3	2	1	2	1	0	0	1	0	0
BRCC3__chrX	0	0	4	2	0	1	7.01	2	1	0	2	4	1	5	5	4	0	2	0	0	0	0	1	1	2	3	3	2	1	0	4	1	1	1	3	3	3	2	5	3	2	1	3	3	0	0	0	0	1
BRD1__chr22	0	1	0	0	0	0	0	0	1	0	2	0	1	1	0	1	0	0	0	0	0	0	2	1	0	2	1	1	0	1	1	3	2	0	2	1	1	1	0	0	0	0	2	0	0	0	0	1	0
BRD2__chr6	0	0	1	2	0	0	6	0	2	0	0	4	1	8.01	2	2	0	4	0	0	0	2	1	1	4	0	10.01	3	3	5	4	4	1	1	3	1	6	3	3	4	2	5	1	9.01	0	0	2	1	2
BRD3__chr9	0	1	7.01	0	0	0	1	1	2	0	0	2	0	0	6	2	0	0	0	0	0	1	0	0	1	2	1	1	1	2	1	1	0	1	1	2	0	0	2	6	1	1	1	3	0	0	0	0	0
BRD4__chr19	1	3	3	1	0	6	10.01	7.01	12.02	0	5	10.01	4	5	8.01	9.01	0	8.01	5	3	4	0	5	3	1	1	4	2	4	2	6	11.01	14.02	1	9.01	6	14.02	6	13.02	14.02	2	13.02	5	9.01	0	1	3	3	3
BRD7P3__chr6	0	0	0	0	0	0	0	0	0	0	0	0	0	0	0	0	0	0	0	0	0	0	0	0	0	0	0	0	0	0	0	0	0	0	0	2	0	0	0	0	0	0	0	0	0	0	0	0	0
BRD7__chr16	2	3	0	0	1	0	2	2	3	1	4	7.01	0	1	2	1	1	2	2	2	1	0	3	0	0	0	2	3	3	4	5	6	5	1	1	2	2	0	7.01	2	2	4	2	6	0	0	4	1	2
BRD8__chr5	1	2	7.01	8.01	0	4	1	5	6	0	5	3	3	1	1	4	0	0	1	8.01	5	0	6	0	0	3	1	1	1	2	8.01	13.02	8.01	0	13.02	4	10.01	4	9.01	8.01	5	18.04	2	19.04	1	0	4	12.02	4
BRD9__chr5	0	0	0	0	0	0	1	1	1	0	1	2	1	1	2	0	0	2	1	1	0	0	2	0	1	2	0	0	3	3	5	2	3	1	4	1	6	2	1	2	1	2	0	1	0	0	2	1	2
BRDT__chr1	0	0	0	0	0	0	0	0	0	0	0	0	0	0	0	1	0	0	0	0	0	0	0	0	0	0	0	0	0	0	0	0	0	0	0	0	0	0	0	0	0	0	1	0	0	0	0	0	0
BRE-AS1__chr2	0	0	0	0	0	0	0	0	0	0	0	0	0	0	0	0	0	0	0	0	0	0	0	0	0	0	0	0	0	0	0	0	0	0	0	0	0	0	0	0	0	0	0	0	0	0	0	0	0
BREA2__chr8	0	0	0	0	0	0	0	0	0	0	0	0	0	0	0	0	0	0	0	0	0	0	0	0	0	0	0	0	0	0	0	0	0	0	0	0	0	0	0	0	0	0	0	0	0	0	0	0	0
BRE__chr2	1	2	0	0	0	1	0	0	2	0	0	1	0	0	1	1	0	2	0	0	0	0	3	0	1	0	1	1	1	5	2	2	3	2	5	0	0	0	1	1	0	2	0	2	0	0	1	1	5
BRF1__chr14	0	0	0	0	0	0	0	0	1	0	0	0	0	0	0	0	0	1	0	1	0	0	0	0	0	0	0	0	1	0	0	1	0	0	0	0	0	1	0	0	0	1	0	0	0	0	0	0	1
BRF2__chr8	1	2	2	1	0	0	1	0	0	0	1	0	0	1	0	1	0	1	0	0	0	0	0	1	0	0	0	2	0	1	0	0	0	1	1	0	2	0	1	2	0	0	1	0	0	0	0	1	0
BRI3BP__chr12	1	2	0	0	0	0	0	1	0	0	0	0	0	1	1	0	0	2	0	0	0	0	0	0	0	0	0	1	0	1	1	2	0	0	1	1	1	0	0	1	0	4	2	0	0	0	0	0	0
BRI3__chr7	14.02	16.03	18.04	4	0	26.08	12.02	7.01	14.02	0	22.06	17.03	6	22.06	32.12	16.03	0	22.06	16.03	13.02	6	2	7.01	4	13.02	15.03	28.09	10.01	4	40.19	30.11	30.11	25.07	6	32.12	53.34	8.01	9.01	39.18	24.07	8.01	24.07	36.15	31.11	1	0	10.01	19.04	21.05
BRICD5__chr16	0	0	0	0	0	0	0	0	0	0	1	0	0	0	0	1	0	0	0	0	0	0	0	0	0	0	0	0	0	0	0	0	1	0	0	0	0	0	0	0	0	0	0	0	0	0	0	0	0
BRIP1__chr17	0	3	5	0	0	0	2	0	3	0	5	9.01	0	0	2	1	0	3	0	0	0	2	2	0	6	0	1	5	1	7.01	4	8.01	4	1	6	3	3	0	7.01	4	3	5	1	3	0	0	1	1	3
BRIX1__chr5	5	1	2	2	0	3	3	4	3	0	3	3	3	8.01	5	3	0	9.01	1	2	2	0	1	4	3	1	3	12.02	4	18.04	4	10.01	3	0	5	2	8.01	0	10.01	3	5	5	3	7.01	0	0	5	2	5
BRK1__chr3	5	8.01	9.01	3	0	7.01	8.01	5	12.02	0	7.01	16.03	7.01	11.01	5	9.01	0	4	5	7.01	2	0	4	2	11.01	9.01	9.01	12.02	3	21.05	22.06	10.01	14.02	4	16.03	8.01	16.03	5	14.02	14.02	10.01	14.02	7.01	11.01	0	0	5	13.02	17.03
BRMS1L__chr14	0	1	0	1	0	1	0	0	0	0	1	1	3	1	3	2	0	0	1	0	0	0	1	0	0	0	0	1	0	0	0	0	1	0	6	0	1	0	1	0	1	0	1	1	0	0	0	0	0
BRMS1__chr11	4	0	1	0	0	4	4	0	2	0	2	2	0	3	1	0	0	1	1	1	0	0	1	0	1	0	0	1	4	4	4	1	1	1	3	0	4	2	2	2	0	1	1	1	0	0	1	2	1
BROX__chr1	0	0	0	0	0	0	0	0	0	0	0	0	0	0	0	0	0	1	0	0	0	0	1	0	0	0	0	0	0	0	0	0	0	0	0	0	0	0	0	0	0	1	1	0	0	0	0	0	0
BRPF1__chr3	0	0	1	0	0	0	1	1	2	0	1	1	0	0	5	1	0	3	0	0	0	0	2	0	0	0	0	1	1	2	2	1	1	0	1	2	0	1	0	4	0	4	1	2	0	0	2	0	0
BRPF3__chr6	0	0	1	1	0	1	2	2	0	0	3	0	0	1	4	1	0	0	2	0	0	0	1	1	1	1	0	1	1	3	2	0	1	0	3	0	2	0	0	1	0	2	0	4	0	0	0	0	1
BRSK1__chr19	0	0	0	0	0	1	0	0	1	0	0	0	0	0	1	0	0	0	0	0	0	0	0	0	0	1	0	0	0	0	0	0	1	0	0	0	0	0	0	1	0	0	0	0	0	0	0	0	0
BRSK2__chr11	0	0	0	0	0	0	0	0	0	0	0	0	0	0	0	0	0	0	0	0	0	0	0	0	0	0	0	0	0	0	0	0	0	0	0	0	0	0	0	0	0	0	0	0	0	0	0	0	0
BRWD1__chr21	1	0	3	0	0	1	0	0	1	0	1	3	0	0	3	3	0	2	0	0	0	0	2	1	0	2	3	2	1	4	1	2	2	3	0	1	0	2	3	4	1	1	1	2	0	0	1	1	3
BRWD3__chrX	0	0	0	1	0	1	0	0	0	0	1	3	1	0	3	0	0	0	0	0	0	0	1	0	0	0	0	1	1	0	2	1	1	0	0	3	2	1	2	0	0	0	1	2	0	0	1	0	1
BSCL2__chr11	0	0	0	0	0	0	0	0	0	0	0	0	0	0	0	0	0	0	0	0	0	0	0	0	0	0	0	0	0	0	0	0	0	0	0	0	0	0	0	0	0	0	0	0	0	0	0	0	0
BSDC1__chr1	0	0	0	0	0	0	1	0	1	0	0	0	0	0	2	0	0	0	1	0	1	0	0	0	0	0	0	0	0	0	4	3	1	0	1	0	0	1	0	0	0	2	0	2	0	0	0	0	1
BSG__chr19	3	10.01	8.01	3	0	3	6	3	10.01	1	6	14.02	5	7.01	6	11.01	0	8.01	7.01	2	1	1	5	2	4	3	9.01	3	6	11.01	16.03	20.05	13.02	2	7.01	8.01	8.01	6	21.05	8.01	4	15.03	12.02	15.03	0	1	1	5	8.01
BSN-AS2__chr3	0	0	0	0	0	0	0	0	0	0	0	0	0	1	0	0	0	0	1	0	0	0	0	0	0	0	0	0	0	0	0	0	0	0	0	0	1	0	0	0	0	0	0	0	0	0	0	0	0
BSN__chr3	0	0	0	0	0	0	0	0	0	0	0	0	0	0	0	0	0	0	0	0	0	0	0	0	0	0	0	0	0	0	0	0	0	0	0	0	0	0	0	0	0	0	0	0	0	0	0	0	0
BSPRY__chr9	0	0	0	0	0	0	0	0	0	0	0	0	0	0	0	0	0	0	0	0	0	0	0	0	0	0	0	0	0	0	0	0	0	0	0	0	0	0	0	0	0	0	0	0	0	1	0	0	0
BST1__chr4	0	0	0	0	0	0	0	0	0	0	0	0	0	0	0	0	0	0	0	0	0	0	0	0	0	0	0	0	0	0	0	0	0	0	0	0	0	0	0	0	0	0	0	0	0	0	0	0	0
BTAF1__chr10	0	0	0	1	0	0	1	3	1	0	2	5	1	5	3	1	0	2	1	1	4	0	2	1	5	0	4	2	1	4	8.01	2	5	1	3	1	3	2	6	5	1	2	4	5	0	0	1	2	2
BTBD10__chr11	7.01	2	1	1	0	3	3	1	4	0	2	3	0	2	2	2	0	8.01	5	1	0	0	3	0	6	2	7.01	1	3	5	9.01	5	8.01	4	3	9.01	7.01	3	3	2	3	4	7.01	6	0	0	7.01	4	2
BTBD11__chr12	0	0	0	0	0	0	1	0	0	0	0	0	0	0	0	1	0	0	0	0	0	0	0	0	1	0	0	1	0	1	1	0	0	0	1	0	1	0	0	0	1	1	0	0	0	0	0	0	0
BTBD18__chr11	0	0	0	0	0	0	0	0	0	0	0	0	0	0	0	0	0	0	0	0	0	0	0	0	0	0	0	0	0	0	0	0	0	0	0	0	0	0	0	0	0	0	0	0	0	0	0	0	0
BTBD19__chr1	0	0	0	0	0	0	0	0	0	0	0	0	0	0	0	0	0	0	0	0	0	0	0	0	0	0	0	0	0	0	0	0	0	0	0	0	0	0	0	0	0	0	0	0	0	0	0	0	0
BTBD1__chr15	0	0	0	0	0	0	1	1	2	0	1	2	1	0	1	0	0	2	0	0	1	0	0	0	0	1	0	0	1	2	2	0	1	0	2	0	1	4	7.01	2	0	1	1	1	0	0	0	0	0
BTBD2__chr19	1	0	0	0	0	2	3	1	4	0	4	2	1	1	2	3	0	0	1	1	1	0	2	0	1	3	5	0	0	2	1	6	6	0	1	1	0	1	4	3	0	2	2	6	0	0	0	1	1
BTBD3__chr20	2	1	1	0	0	2	0	1	0	0	1	2	1	1	0	0	0	2	0	1	0	0	0	0	2	0	2	1	0	4	2	2	1	4	0	0	1	3	2	0	1	3	2	2	0	0	1	2	1
BTBD6__chr14	1	1	4	3	0	2	2	0	1	0	2	1	1	3	2	2	0	2	0	1	0	0	1	1	6	2	1	3	2	5	2	16.03	9.01	1	7.01	0	4	1	11.01	3	0	4	4	3	2	0	5	5	3
BTBD7__chr14	3	0	3	0	0	4	2	1	1	0	2	4	0	2	1	3	0	2	1	0	0	0	2	1	0	1	4	0	2	3	3	2	5	3	2	2	0	2	4	4	1	1	0	4	0	0	2	0	1
BTBD8__chr1	0	0	0	0	0	0	0	0	0	0	0	0	0	0	0	0	0	0	0	0	0	0	0	0	0	0	0	0	0	0	0	0	0	0	0	0	0	0	0	0	0	0	0	0	0	0	0	0	0
BTBD9__chr6	1	0	0	0	0	1	0	0	0	0	0	0	0	0	0	0	0	0	0	0	0	0	0	0	0	0	1	0	0	1	0	0	2	0	1	0	0	0	2	1	0	0	0	0	0	0	0	0	1
BTC__chr4	0	0	0	0	0	0	0	0	0	0	0	0	0	0	0	0	0	0	0	0	0	0	0	0	1	0	0	0	0	0	0	0	0	0	0	0	0	1	0	0	0	0	0	0	0	0	0	0	0
BTD__chr3	0	1	0	1	0	0	0	0	0	0	0	1	0	0	0	0	0	1	1	0	0	0	0	0	0	0	0	0	0	1	0	0	0	0	0	2	2	0	3	0	1	0	0	0	0	0	0	0	1
BTF3L4__chr1	3	2	7.01	5	0	5	2	2	5	1	0	12.02	5	6	8.01	8.01	0	3	6	2	3	1	3	4	7.01	0	3	2	4	14.02	10.01	8.01	11.01	3	9.01	9.01	1	7.01	13.02	7.01	5	5	9.01	7.01	0	0	9.01	2	7.01
BTF3P11__chr13	0	0	0	0	0	0	0	0	0	0	0	0	0	0	0	0	0	0	0	0	0	0	0	0	0	0	0	0	0	0	0	0	0	0	0	0	0	0	0	0	0	0	0	0	0	0	0	0	0
BTF3__chr5	21.05	21.05	30.11	23.06	0	33.13	35.15	17.03	25.07	1	24.07	84.86	20.05	48.28	45.24	38.17	0	32.12	31.11	19.04	10.01	3	27.09	16.03	47.27	31.11	44.23	68.56	28.09	99.18	55.37	62.47	46.25	13.02	56.38	66.53	77.72	38.17	68.56	58.41	43.22	45.24	51.31	71.61	0	1	49.29	27.09	30.11
BTG1__chr12	6	5	5	5	0	4	7.01	6	8.01	0	7.01	5	5	1	3	3	0	1	2	3	2	0	3	1	1	0	2	3	1	6	12.02	11.01	1	4	10.01	4	12.02	4	11.01	5	9.01	13.02	5	14.02	0	0	4	13.02	6
BTG2__chr1	0	0	0	0	0	0	1	0	0	0	0	5	0	0	0	0	0	0	1	0	0	0	0	0	0	0	1	0	0	0	0	0	0	0	0	0	0	0	0	0	0	0	0	0	0	0	0	0	2
BTG3__chr21	1	3	2	3	0	6	2	1	2	0	4	9.01	1	3	4	4	0	5	4	2	0	1	2	0	4	1	0	7.01	4	5	13.02	10.01	12.02	5	8.01	3	4	8.01	6	7.01	5	3	4	13.02	0	0	2	5	3
BTN2A1__chr6	2	5	1	0	0	0	2	0	3	0	0	1	1	0	2	2	0	1	1	0	0	0	2	1	0	0	2	0	0	1	0	2	1	1	1	0	1	0	1	3	0	2	3	3	0	0	1	0	1
BTN2A2__chr6	1	0	0	0	0	2	1	0	1	0	0	1	3	0	1	0	0	1	0	0	0	0	0	0	2	0	2	1	0	1	4	0	0	0	3	0	0	0	3	1	0	3	0	0	0	0	0	0	2
BTN2A3P__chr6	0	0	0	0	0	0	0	0	0	0	0	1	0	0	0	0	0	0	0	0	0	0	0	0	0	0	0	0	0	0	0	0	0	0	0	0	0	0	0	0	0	0	0	0	0	0	0	0	0
BTN3A1__chr6	0	1	0	1	0	0	0	0	0	0	0	0	0	0	1	1	0	0	1	0	0	0	0	0	1	1	0	0	0	1	0	1	0	0	0	0	1	0	2	0	0	0	1	2	0	0	0	0	0
BTN3A2__chr6	1	0	0	0	0	2	0	0	0	0	0	2	1	0	2	2	0	0	1	0	0	0	0	1	1	0	0	1	0	1	2	1	0	0	5	0	1	1	3	1	0	0	1	0	0	0	0	1	0
BTN3A3__chr6	1	0	0	0	0	1	0	0	0	0	0	0	0	0	0	3	0	0	0	0	0	0	0	0	0	0	0	0	0	0	0	0	0	0	0	0	0	1	0	0	1	0	0	1	0	0	0	0	0
BTNL8__chr5	0	0	0	0	0	0	0	0	0	0	0	0	0	0	0	0	0	0	0	0	0	0	0	0	0	0	0	0	0	0	0	0	1	0	0	0	0	0	0	0	0	0	0	0	0	0	0	0	0
BTNL9__chr5	0	0	0	0	0	0	0	0	0	0	0	0	0	0	0	0	0	0	0	0	0	0	0	0	0	0	0	0	0	0	0	0	0	0	0	0	0	0	0	0	0	0	0	0	0	0	0	0	0
BTRC__chr10	0	2	2	0	0	1	0	0	1	0	0	3	0	0	1	0	0	0	3	0	1	0	1	0	2	0	2	1	0	1	3	1	1	0	1	1	1	5	5	0	0	0	0	3	0	0	1	1	1
BUB1B__chr15	3	5	8.01	4	0	7.01	4	4	7.01	0	3	7.01	2	3	7.01	8.01	0	2	2	0	1	2	6	1	0	0	0	1	5	6	18.04	15.03	13.02	1	13.02	5	7.01	9.01	14.02	8.01	6	13.02	3	14.02	1	0	1	7.01	0
BUB1__chr2	6	8.01	9.01	4	0	9.01	0	2	8.01	0	9.01	3	0	2	0	2	0	3	2	3	2	0	4	3	2	0	0	4	1	9.01	9.01	13.02	11.01	1	19.04	6	12.02	3	18.04	10.01	7.01	11.01	5	9.01	0	0	2	4	3
BUB3__chr10	19.04	13.02	33.13	24.07	0	34.14	18.04	20.05	42.21	0	27.09	35.15	14.02	14.02	22.06	33.13	0	6	7.01	14.02	15.03	2	22.06	16.03	22.06	5	14.02	25.07	9.01	65.51	53.34	87.93	51.31	17.03	59.42	37.16	41.2	28.09	54.35	36.15	26.08	62.47	40.19	53.34	2	2	35.15	37.16	23.06
BUD13__chr11	1	3	0	0	0	0	0	0	0	0	1	0	0	0	1	0	0	0	0	1	0	0	0	0	0	0	0	2	0	2	3	1	0	1	1	0	0	1	1	0	1	1	4	2	0	1	1	1	0
BUD31__chr7	2	2	0	0	0	1	0	2	1	0	0	2	2	2	0	4	0	2	3	2	0	0	2	0	2	1	5	0	0	2	8.01	1	7.01	2	4	2	3	0	3	2	1	2	5	3	0	0	1	0	0
BVES__chr6	0	1	0	0	0	0	0	0	0	0	1	3	0	1	0	0	0	0	0	0	0	0	0	0	3	0	0	0	2	2	1	2	1	1	2	0	1	1	2	1	0	0	1	2	0	0	0	0	1
BYSL__chr6	1	1	2	1	0	0	1	0	5	0	1	0	0	3	1	0	0	0	0	1	0	1	2	2	2	0	2	2	0	5	1	3	3	0	0	1	1	0	0	5	1	4	2	3	0	1	0	0	0
BZRAP1-AS1__chr17	0	0	0	0	0	0	0	1	0	0	0	0	0	0	0	0	0	0	0	0	0	0	0	0	0	0	0	0	0	0	0	0	0	0	0	0	1	0	0	0	0	0	0	0	0	0	0	0	0
BZRAP1__chr17	0	0	0	0	0	0	0	0	0	0	0	0	0	0	1	0	0	0	0	0	0	0	0	0	0	0	0	0	0	0	0	0	0	0	0	0	0	0	0	0	0	2	0	0	0	0	0	0	0
BZW1__chr2	7.01	16.03	16.03	9.01	0	21.05	22.06	10.01	15.03	1	17.03	50.3	10.01	11.01	26.08	11.01	0	23.06	23.06	14.02	6	2	14.02	8.01	22.06	17.03	21.05	31.11	12.02	46.25	30.11	43.22	34.14	16.03	22.06	24.07	12.02	9.01	33.13	21.05	20.05	34.14	28.09	28.09	2	1	24.07	5	25.07
BZW2__chr7	0	1	1	2	0	1	3	3	3	0	3	5	1	6	4	0	0	1	2	5	0	2	0	1	2	3	6	4	2	5	6	4	8.01	1	5	5	3	0	9.01	7.01	6	4	2	6	0	0	1	0	3
C10orf107__chr10	0	0	0	0	0	0	0	0	0	0	0	0	0	0	0	0	0	0	0	0	0	0	0	0	0	0	0	0	0	0	0	0	0	0	0	0	0	0	0	0	0	0	0	0	0	0	0	0	0
C10orf10__chr10	0	0	0	0	0	0	0	0	0	0	0	0	0	0	0	0	0	0	0	0	0	0	0	0	0	0	0	0	0	0	0	1	0	0	0	0	0	0	0	0	0	1	0	0	0	0	0	0	0
C10orf111__chr10	0	0	0	0	0	0	0	0	0	0	0	1	0	0	0	0	0	0	0	0	0	0	0	0	0	0	0	0	0	0	0	0	0	0	0	0	0	0	0	0	0	0	0	1	0	0	0	0	0
C10orf114__chr10	0	0	0	0	0	0	0	0	0	0	0	0	0	0	0	0	0	0	0	0	0	0	0	0	0	0	0	0	0	0	0	0	1	0	0	0	1	0	0	0	0	0	0	0	0	0	0	0	0
C10orf116__chr10	0	0	0	0	0	0	0	0	0	0	0	0	0	0	0	0	0	0	0	0	0	0	0	0	0	0	0	0	0	0	0	0	0	0	0	0	0	0	0	0	0	0	0	0	0	0	0	0	0
C10orf118__chr10	0	0	0	0	0	2	0	1	2	0	0	0	0	1	3	0	0	1	2	1	0	0	0	1	0	1	0	0	2	2	3	1	2	1	3	1	4	1	0	3	0	1	0	0	0	0	1	0	1
C10orf11__chr10	0	0	0	0	0	0	0	0	0	0	0	0	0	0	0	0	0	0	0	0	0	0	0	0	0	0	0	0	0	0	0	0	0	0	0	0	0	0	0	0	0	0	0	0	0	0	0	0	0
C10orf12__chr10	1	1	1	0	0	0	0	0	0	0	0	0	2	0	0	0	0	0	0	0	1	0	1	0	0	0	1	0	0	0	2	2	1	0	0	0	2	0	7.01	1	0	0	0	0	0	0	1	1	0
C10orf131__chr10	0	0	0	0	0	0	0	0	0	0	0	0	0	0	0	0	0	0	0	0	0	0	0	0	0	0	0	0	0	0	0	0	0	0	0	0	0	0	0	0	0	0	0	0	0	0	0	0	0
C10orf137__chr10	0	0	2	0	0	1	1	2	0	0	0	2	1	1	5	0	0	1	1	0	0	0	1	2	3	1	2	2	0	0	0	1	2	0	2	1	2	2	2	3	4	1	2	5	0	0	0	1	1
C10orf25__chr10	0	0	0	0	0	0	0	0	0	0	0	0	0	0	0	0	0	0	0	0	0	0	0	0	0	0	0	0	0	0	0	0	0	0	0	0	0	0	0	0	0	0	0	0	0	0	0	0	0
C10orf2__chr10	0	1	1	0	0	0	1	1	0	0	0	1	1	1	2	0	0	1	2	1	0	0	0	0	0	1	0	0	1	0	0	3	3	0	0	0	2	0	0	0	0	2	0	0	0	0	0	0	0
C10orf32__chr10	1	3	4	1	0	1	0	0	2	0	2	2	0	0	2	5	0	4	2	0	0	0	0	1	1	1	1	0	1	9.01	3	2	1	0	2	4	4	1	3	3	2	1	0	0	0	0	0	2	7.01
C10orf35__chr10	0	0	0	0	0	0	0	0	0	0	0	0	0	0	0	0	0	0	0	0	0	0	0	0	0	0	0	0	0	1	0	0	0	0	0	0	0	0	0	0	0	0	0	0	0	0	0	0	0
C10orf54__chr10	0	0	0	1	0	0	0	0	0	0	0	0	0	0	0	0	0	1	0	0	0	0	0	0	0	0	0	0	0	0	0	0	0	0	0	0	0	0	2	0	0	0	0	0	0	0	1	0	0
C10orf55__chr10	0	0	0	0	0	0	0	0	1	0	0	0	0	0	0	0	0	0	0	0	0	0	0	0	0	0	0	0	0	0	0	0	0	0	0	0	0	0	0	0	0	0	0	0	0	0	0	0	0
C10orf68__chr10	0	0	0	0	0	0	0	0	0	0	0	0	0	0	0	0	0	0	0	0	0	0	0	0	0	0	0	0	0	0	0	0	0	0	0	0	0	0	0	0	0	0	0	0	0	0	0	0	0
C10orf76__chr10	1	1	0	0	0	1	1	1	0	0	0	2	1	2	0	0	0	0	0	0	0	0	0	0	0	0	0	0	1	1	4	0	1	0	2	2	2	0	1	1	0	1	1	5	0	0	2	0	0
C10orf88__chr10	2	0	2	1	0	1	0	0	4	0	0	1	0	0	0	0	0	1	0	0	0	0	1	0	2	0	0	2	0	3	2	1	4	0	3	0	2	0	5	0	2	0	2	2	0	0	0	2	0
C10orf90__chr10	0	0	0	0	0	0	0	0	0	0	0	0	0	0	0	0	0	0	0	0	0	0	0	0	0	0	0	0	1	0	0	0	0	0	0	0	0	0	0	0	0	0	0	1	0	0	0	0	1
C10orf95__chr10	0	0	0	0	0	0	0	0	0	0	0	0	0	0	0	0	0	0	0	0	0	0	0	0	0	0	0	0	0	0	0	0	0	0	0	0	0	0	0	0	0	0	0	0	0	0	0	0	0
C11orf1__chr11	2	1	2	0	0	0	0	0	2	0	0	2	0	1	4	3	0	0	2	0	0	0	1	1	1	0	1	0	0	2	3	4	1	0	2	2	2	2	4	4	0	6	2	2	0	0	0	0	1
C11orf24__chr11	2	2	4	0	0	1	1	1	4	0	1	3	0	1	2	3	0	2	2	1	0	0	1	0	4	0	3	1	0	6	3	2	5	0	4	1	1	0	6	2	0	5	1	3	1	0	0	2	4
C11orf30__chr11	0	0	0	1	0	0	1	0	0	0	0	1	1	3	4	1	0	0	0	0	0	0	0	0	1	0	1	1	0	0	2	0	0	0	1	0	2	1	1	0	1	0	0	0	0	0	0	0	0
C11orf31__chr11	2	4	3	0	0	10.01	4	2	4	0	7.01	9.01	3	7.01	8.01	3	0	3	5	0	1	1	2	1	8.01	8.01	8.01	5	2	10.01	2	6	9.01	2	10.01	10.01	4	3	5	6	8.01	8.01	3	8.01	0	0	8.01	7.01	5
C11orf35__chr11	0	0	0	0	0	0	0	0	0	0	0	0	0	0	0	0	0	0	0	0	0	0	0	0	0	0	0	0	0	0	0	0	0	0	0	0	0	0	0	0	0	0	0	0	0	0	0	0	0
C11orf42__chr11	0	0	0	0	0	0	0	0	0	0	0	0	0	0	0	0	0	0	0	0	0	0	0	0	0	0	0	0	0	0	0	0	0	0	0	0	1	0	0	0	0	0	0	0	0	0	0	0	0
C11orf44__chr11	0	0	0	0	0	0	0	0	0	0	0	0	0	0	0	0	0	0	0	0	0	0	0	0	0	0	0	0	0	0	1	0	0	0	0	0	0	0	0	0	0	0	0	0	0	0	0	0	0
C11orf45__chr11	0	0	0	0	0	0	0	0	0	0	0	0	0	1	0	0	0	0	0	0	0	0	0	0	1	0	0	1	0	0	0	0	0	0	0	0	0	0	0	0	0	1	0	0	0	0	0	0	0
C11orf48__chr11	0	1	1	0	0	3	1	0	3	0	2	7.01	2	4	7.01	2	0	2	2	0	2	0	1	1	3	3	3	3	0	8.01	2	4	7.01	1	2	5	2	3	3	7.01	2	2	6	8.01	0	0	1	2	7.01
C11orf49__chr11	0	1	1	2	0	2	1	0	2	0	0	4	2	0	5	1	0	2	1	0	0	0	1	0	0	2	0	0	6	2	0	4	2	0	2	0	3	2	1	2	0	0	0	3	0	0	0	1	2
C11orf54__chr11	0	1	0	1	0	2	0	0	1	0	2	1	0	1	0	0	0	0	0	0	0	0	0	0	0	0	0	0	0	0	1	1	1	0	0	0	0	0	0	0	1	0	1	0	0	0	0	0	0
C11orf57__chr11	1	0	1	2	0	1	0	1	0	0	1	5	2	1	4	2	0	2	1	0	0	0	2	0	0	0	2	0	0	5	2	1	5	1	5	0	0	1	2	2	1	1	1	2	1	0	0	2	0
C11orf58__chr11	3	2	8.01	5	0	10.01	4	7.01	10.01	0	10.01	30.11	4	7.01	15.03	8.01	0	10.01	5	6	1	1	5	6	12.02	6	15.03	15.03	14.02	26.08	15.03	15.03	12.02	13.02	10.01	9.01	13.02	6	14.02	16.03	10.01	11.01	15.03	7.01	0	1	7.01	6	13.02
C11orf63__chr11	0	0	0	0	0	0	0	0	0	0	0	0	0	0	2	0	0	0	0	2	0	0	0	0	0	0	1	0	0	0	0	0	0	0	0	0	1	0	0	0	0	0	0	0	0	0	0	0	0
C11orf65__chr11	0	1	0	0	0	0	0	0	0	0	0	0	0	0	0	0	0	0	0	0	0	0	0	0	0	0	0	0	0	0	0	0	0	0	0	0	0	0	0	0	0	0	0	0	0	0	0	0	0
C11orf68__chr11	1	2	1	0	0	3	5	2	8.01	0	2	9.01	7.01	0	8.01	3	0	8.01	6	3	2	0	0	1	3	2	4	1	2	4	10.01	8.01	12.02	0	18.04	2	7.01	3	10.01	5	3	11.01	11.01	13.02	0	0	3	4	3
C11orf70__chr11	0	0	0	0	0	3	0	0	0	0	0	0	0	0	0	0	0	1	0	0	0	0	0	0	0	0	0	0	0	0	0	0	1	0	0	0	0	0	1	2	0	0	2	0	0	0	0	0	0
C11orf71__chr11	0	0	0	0	0	0	0	0	0	0	0	0	0	0	0	0	0	0	0	0	0	0	0	0	0	1	0	0	0	0	0	1	0	0	0	0	0	0	0	0	0	0	0	0	0	0	0	0	0
C11orf73__chr11	1	0	0	0	0	0	2	0	2	0	3	1	0	1	1	2	0	1	1	0	0	0	3	0	2	1	3	1	1	7.01	3	2	1	1	4	2	1	0	0	1	2	1	0	6	0	0	1	0	4
C11orf74__chr11	0	1	1	0	0	0	0	0	0	0	0	0	0	0	0	1	0	0	0	0	0	0	0	0	0	1	0	0	1	0	0	0	0	0	2	0	0	0	1	0	0	0	1	0	0	0	0	0	2
C11orf75__chr11	0	0	0	0	0	0	0	0	0	0	0	0	1	0	4	0	0	0	0	0	0	0	0	0	1	0	0	1	1	1	0	0	3	0	0	0	0	0	0	0	2	0	1	0	0	0	0	0	0
C11orf80__chr11	0	0	0	0	0	0	2	0	0	0	0	1	0	0	2	0	0	1	0	1	0	0	1	0	0	0	0	0	0	1	4	1	0	0	0	1	1	0	1	3	0	0	1	1	0	0	0	1	0
C11orf82__chr11	1	0	2	0	0	1	1	0	1	0	1	1	0	0	2	0	0	1	0	0	0	0	1	0	0	0	0	4	0	1	2	2	0	1	2	0	1	1	1	0	1	2	1	2	0	0	0	0	3
C11orf83__chr11	1	0	1	0	0	2	1	0	0	0	1	1	0	0	0	0	0	1	1	0	0	0	0	0	0	1	0	4	0	1	1	0	2	0	1	2	0	1	0	2	2	4	1	0	0	0	1	3	0
C11orf84__chr11	0	1	3	0	0	0	3	1	1	0	2	0	3	1	1	2	0	0	0	0	0	0	5	0	1	0	1	0	1	4	2	2	3	0	3	1	1	0	1	6	0	5	1	1	0	0	3	0	2
C11orf87__chr11	0	0	0	0	0	0	0	0	0	0	0	0	0	0	0	0	0	0	0	0	0	0	0	0	0	0	0	0	0	0	0	0	0	0	0	0	0	0	0	0	0	0	0	0	0	0	0	0	0
C11orf91__chr11	0	0	0	0	0	1	0	0	0	0	0	0	0	0	1	0	0	1	0	1	0	0	0	0	0	0	0	0	0	1	0	0	0	0	1	0	0	0	0	0	0	0	1	0	0	0	0	0	0
C11orf92__chr11	0	0	0	0	0	0	0	0	0	0	0	0	0	0	0	0	0	0	0	0	0	0	0	0	0	0	0	0	0	0	0	0	0	0	0	0	0	0	0	0	0	0	0	0	0	0	0	0	0
C11orf94__chr11	0	0	0	0	0	0	0	0	0	0	0	0	0	0	0	0	0	0	0	0	0	0	0	0	0	0	0	0	0	0	0	0	0	0	0	0	0	0	0	0	0	0	0	0	0	0	0	0	0
C11orf95__chr11	1	0	3	0	0	1	1	0	4	0	0	1	1	0	2	1	0	0	1	1	1	0	0	0	3	1	2	0	0	1	1	4	4	0	1	3	1	3	3	2	2	2	2	2	0	0	1	1	0
C11orf96__chr11	0	0	0	0	0	0	0	0	0	0	0	0	0	0	0	0	0	0	0	0	0	0	0	0	0	0	0	0	0	0	0	0	0	0	0	0	0	0	0	0	0	0	0	0	0	0	0	0	0
C12orf10__chr12	0	1	0	1	0	3	1	0	2	0	4	5	1	2	4	3	0	15.03	3	1	0	0	3	0	0	4	1	0	2	4	4	9.01	4	0	8.01	0	4	1	5	12.02	2	4	4	9.01	0	0	1	2	3
C12orf23__chr12	1	1	6	4	1	5	7.01	1	5	0	2	25.07	5	6	7.01	9.01	0	1	5	4	1	1	10.01	2	3	4	10.01	5	7.01	18.04	9.01	4	12.02	6	4	7.01	7.01	4	8.01	3	0	5	11.01	11.01	0	0	0	1	15.03
C12orf29__chr12	0	1	1	2	0	4	3	0	3	0	0	4	1	3	2	1	0	0	1	0	0	0	3	2	2	0	2	6	0	4	3	2	5	1	2	1	1	0	1	0	4	4	0	2	0	0	4	0	3
C12orf36__chr12	0	0	0	0	0	0	0	0	0	0	0	0	0	0	0	0	0	0	0	0	0	0	0	0	0	0	0	0	0	0	0	0	0	0	0	0	0	0	0	0	0	0	0	0	0	0	0	0	0
C12orf39__chr12	0	0	0	0	0	0	0	0	0	0	0	0	0	0	0	0	0	0	0	0	0	0	0	0	0	0	0	0	0	0	0	0	0	0	0	0	0	0	0	0	0	0	0	0	0	0	0	0	0
C12orf43__chr12	1	3	0	0	0	1	1	0	3	0	3	0	0	3	0	1	0	1	0	0	0	0	2	0	1	1	2	0	0	1	3	0	3	2	1	7.01	3	2	1	2	0	2	1	3	0	0	0	0	0
C12orf44__chr12	1	1	2	1	0	2	1	0	0	0	2	1	0	2	3	2	1	1	3	2	0	0	3	0	1	1	4	0	0	3	1	2	1	0	0	2	0	2	2	3	1	2	1	4	0	0	3	0	2
C12orf45__chr12	0	2	0	1	0	4	1	1	1	0	2	7.01	3	3	4	2	0	5	2	0	0	0	1	3	2	2	2	4	1	4	2	4	3	0	1	2	2	2	3	5	1	0	1	2	0	0	3	1	0
C12orf49__chr12	1	0	6	0	0	2	1	1	5	0	0	0	0	0	0	1	0	0	3	0	0	0	0	1	1	0	0	0	1	1	2	0	3	0	4	2	3	1	1	0	4	0	1	2	0	0	1	1	1
C12orf4__chr12	1	0	1	0	0	0	0	0	2	0	0	1	1	0	1	1	0	4	0	0	0	0	1	1	0	0	1	1	0	3	1	1	2	2	2	3	1	0	2	1	1	2	4	5	0	0	1	0	0
C12orf52__chr12	1	4	2	1	0	3	2	4	0	0	1	4	0	1	3	2	0	3	3	1	4	0	2	0	3	4	6	2	1	6	6	3	9.01	1	6	2	0	4	6	8.01	1	5	0	6	0	0	4	2	2
C12orf57__chr12	5	5	7.01	0	0	3	5	1	7.01	0	7.01	4	4	6	10.01	5	0	7.01	9.01	1	1	0	4	2	7.01	7.01	5	10.01	7.01	7.01	11.01	10.01	10.01	4	10.01	9.01	11.01	7.01	16.03	11.01	13.02	6	5	11.01	0	0	6	6	14.02
C12orf5__chr12	0	0	1	0	0	2	4	1	0	0	0	8.01	0	5	3	0	0	3	4	0	1	0	1	0	1	3	2	4	1	4	2	3	6	2	2	3	0	1	5	2	2	0	1	3	1	0	0	1	3
C12orf60__chr12	0	0	0	0	0	0	0	0	0	0	0	0	0	0	0	0	0	0	0	0	0	0	1	0	0	0	0	0	0	0	0	0	0	0	0	2	0	0	1	0	1	1	0	0	0	0	0	0	0
C12orf61__chr12	0	0	0	0	0	0	0	0	0	0	0	2	0	1	0	0	0	0	0	1	0	0	0	0	0	0	0	0	0	0	0	0	0	0	0	0	1	0	0	0	0	1	0	0	0	0	0	0	0
C12orf65__chr12	2	0	2	0	0	3	3	0	4	0	0	1	1	0	0	0	0	2	1	0	0	0	1	0	1	0	4	2	0	1	11.01	3	2	3	2	2	7.01	2	7.01	4	1	2	3	7.01	0	0	2	2	1
C12orf66__chr12	0	0	1	0	0	0	0	0	0	0	0	1	0	0	0	0	0	0	0	0	0	0	0	0	0	1	0	0	0	0	0	1	0	0	1	0	0	0	0	0	0	0	0	0	0	0	0	0	0
C12orf68__chr12	0	0	0	0	0	0	0	0	1	0	1	1	0	0	1	0	0	0	0	0	0	0	0	0	0	0	0	0	0	0	0	3	1	0	0	0	0	1	0	2	0	0	0	1	0	0	0	0	0
C12orf70__chr12	0	0	0	0	0	0	0	0	0	0	0	0	0	0	0	0	0	0	0	0	0	0	0	0	0	0	0	0	0	1	0	0	0	0	0	0	0	0	0	0	0	0	0	0	0	0	0	0	0
C12orf73__chr12	2	0	1	1	0	0	0	0	0	0	0	1	1	0	2	1	0	0	0	0	0	0	0	0	2	0	2	1	0	2	3	1	1	2	0	3	2	2	0	0	0	2	0	2	0	0	0	0	1
C12orf75__chr12	20.05	22.06	23.06	21.05	0	26.08	20.05	9.01	28.09	0	26.08	63.48	16.03	21.05	30.11	27.09	0	24.07	17.03	17.03	4	5	17.03	5	21.05	9.01	34.14	29.1	19.04	96.11	42.21	58.41	49.29	18.04	38.17	61.45	37.16	11.01	60.44	52.33	28.09	37.16	46.25	34.14	1	0	33.13	30.11	25.07
C12orf76__chr12	0	0	0	0	0	0	1	0	0	0	0	0	0	0	2	1	0	0	1	1	0	0	0	0	1	0	0	0	1	0	2	0	0	0	1	0	1	1	0	1	1	0	1	1	0	0	0	0	0
C12orf77__chr12	0	0	0	0	0	0	0	0	0	0	0	0	0	0	0	0	0	0	0	0	0	0	0	0	0	0	0	0	0	0	0	0	0	0	0	0	0	0	0	0	0	0	0	0	0	0	0	0	0
C14orf101__chr14	0	0	1	0	0	1	0	0	0	0	0	2	0	1	1	1	0	0	0	0	0	0	1	0	0	2	0	1	0	0	0	2	0	0	2	1	2	0	0	1	2	1	0	0	0	0	0	0	0
C14orf105__chr14	0	0	0	0	0	0	0	0	0	0	0	0	0	0	0	0	0	0	0	0	0	0	0	1	0	0	0	0	0	0	0	0	0	0	0	0	0	0	0	0	0	0	0	0	0	0	0	0	0
C14orf119__chr14	1	3	2	6	0	4	1	0	3	0	0	10.01	3	2	6	1	0	3	1	2	0	0	2	2	2	2	3	1	1	5	3	6	2	1	3	0	4	1	7.01	4	4	6	2	5	0	0	2	1	2
C14orf132__chr14	0	0	0	0	0	0	0	0	0	0	0	0	0	0	0	0	0	0	0	0	0	0	0	0	0	0	0	0	0	0	0	0	0	0	0	0	1	0	0	0	0	0	0	0	0	0	0	0	0
C14orf142__chr14	0	1	0	0	0	2	0	0	1	0	0	0	3	2	0	0	0	0	0	0	0	0	1	1	0	0	2	1	0	2	0	0	0	1	1	1	5	0	3	0	0	0	1	0	0	0	0	1	0
C14orf159__chr14	1	0	0	0	0	0	1	1	3	0	0	1	0	0	0	1	0	0	1	0	0	0	0	0	2	0	0	0	0	0	0	0	0	0	1	0	0	1	1	0	0	0	0	2	0	0	1	1	1
C14orf166__chr14	5	0	6	6	0	3	1	1	2	0	1	16.03	2	3	6	3	0	3	2	2	2	1	0	1	9.01	6	5	2	1	9.01	7.01	8.01	6	0	9.01	5	5	3	6	2	8.01	7.01	10.01	7.01	0	0	6	2	12.02
C14orf169__chr14	0	0	1	0	0	1	0	1	0	0	0	0	0	0	2	0	0	0	0	0	0	0	2	0	1	0	1	1	0	4	1	3	2	0	2	1	1	0	0	1	2	0	0	0	0	0	2	0	1
C14orf178__chr14	0	0	0	0	0	0	0	0	0	0	0	0	0	0	0	0	0	0	0	0	0	0	0	0	0	0	0	0	0	0	0	0	0	0	0	0	0	0	0	0	0	0	0	0	0	0	0	0	0
C14orf182__chr14	0	0	0	0	0	0	0	0	0	0	0	0	0	0	0	0	0	0	0	0	0	0	0	0	0	0	0	0	0	0	0	0	1	0	0	0	0	0	0	0	0	0	0	0	0	0	0	0	0
C14orf1__chr14	1	1	0	2	0	1	1	0	0	0	1	6	1	2	4	5	0	1	3	0	1	1	3	0	3	2	4	0	4	3	5	5	5	0	0	6	6	2	6	5	3	4	0	4	0	0	0	1	0
C14orf23__chr14	0	0	0	0	0	0	0	0	0	0	0	0	0	0	0	0	0	0	0	0	0	0	0	0	0	0	0	0	0	0	0	0	0	0	0	0	0	0	0	0	0	0	0	0	0	0	0	0	0
C14orf28__chr14	0	0	0	0	0	0	0	0	0	0	0	1	0	0	0	0	0	0	1	0	0	0	0	0	0	0	0	0	0	0	0	0	0	0	0	0	0	0	0	0	0	0	0	0	0	0	0	0	0
C14orf2__chr14	1	1	4	2	0	3	5	1	4	0	6	13.02	2	7.01	8.01	6	0	3	3	0	2	3	5	1	8.01	5	7.01	5	0	17.03	5	9.01	4	3	11.01	4	8.01	4	8.01	7.01	3	4	9.01	5	0	0	6	6	4
C14orf37__chr14	0	0	1	0	0	0	0	0	0	0	0	0	0	0	1	0	0	0	0	0	0	0	0	0	0	0	0	0	0	0	0	0	0	0	0	0	0	0	0	0	0	0	0	0	0	0	0	0	0
C14orf64__chr14	0	0	0	0	0	0	0	0	0	0	0	0	0	0	0	0	0	0	0	0	0	0	0	0	0	0	0	0	0	0	0	0	0	0	0	0	0	0	0	0	0	0	0	0	0	0	0	0	0
C14orf79__chr14	0	0	0	0	0	0	0	0	0	0	0	0	0	0	1	0	0	0	0	0	0	0	1	0	0	1	1	0	1	1	0	1	0	0	0	0	0	0	0	1	1	2	0	0	0	0	0	0	1
C14orf80__chr14	0	1	0	0	0	2	0	0	0	0	0	0	0	1	0	2	0	0	0	0	0	0	0	0	1	0	0	0	0	1	1	0	4	1	1	0	0	0	0	1	2	4	1	1	0	0	0	0	1
C14orf93__chr14	0	0	0	0	0	0	0	0	0	0	0	0	0	0	0	0	0	1	0	0	0	0	0	0	1	3	0	0	0	0	0	0	0	0	0	0	0	1	0	0	0	1	0	0	0	0	1	0	0
C15orf26__chr15	0	0	0	0	0	0	0	0	0	0	0	0	0	0	0	0	0	0	0	0	0	0	0	0	0	0	0	0	0	0	0	0	0	0	0	0	0	0	0	0	0	0	0	0	0	0	0	0	0
C15orf37__chr15	0	0	0	0	0	0	0	0	0	0	0	0	0	2	0	0	0	0	0	0	0	0	0	0	0	0	0	0	1	0	0	0	0	0	0	0	0	0	1	0	0	0	0	0	0	0	0	0	0
C15orf38__chr15	0	0	0	0	0	0	1	0	0	0	0	0	0	1	0	0	0	0	0	0	0	0	0	0	0	0	0	0	1	1	0	1	2	0	0	0	1	0	0	0	0	0	1	0	0	0	0	2	0
C15orf39__chr15	0	0	0	0	0	0	1	0	3	0	0	1	0	0	0	1	0	0	1	0	0	0	0	0	1	0	1	0	0	0	0	2	0	0	0	0	0	0	1	2	1	0	0	0	0	0	0	1	1
C15orf40__chr15	0	0	0	0	0	0	1	0	0	0	0	0	2	0	1	1	0	0	0	2	1	0	2	1	1	0	1	1	0	1	2	1	2	0	3	0	1	0	1	0	0	2	4	0	0	0	0	0	0
C15orf41__chr15	0	1	0	0	0	1	0	0	1	0	0	0	0	0	1	1	0	1	0	0	0	0	1	0	0	0	0	0	1	0	3	0	0	0	0	0	0	0	0	2	0	1	1	1	0	0	0	0	0
C15orf48__chr15	0	0	0	0	0	0	0	0	0	0	0	0	0	0	0	0	0	0	0	0	0	0	0	0	0	0	0	0	0	0	0	0	0	0	0	0	0	0	0	0	0	0	0	0	0	0	0	0	0
C15orf52__chr15	0	1	0	0	0	3	2	0	0	0	1	4	1	7.01	6	5	0	0	3	1	0	0	0	0	4	6	1	2	1	1	4	3	7.01	1	2	1	0	3	12.02	6	1	2	2	3	0	0	1	3	1
C15orf54__chr15	0	0	0	0	0	0	0	0	0	0	0	0	0	1	0	0	0	0	0	0	0	0	0	0	0	0	0	0	0	0	0	0	0	0	0	0	0	0	0	0	0	0	0	0	0	0	0	0	1
C15orf56__chr15	0	0	0	0	0	0	0	0	0	0	0	0	0	0	0	0	0	0	0	0	0	0	0	0	0	0	0	0	0	0	0	0	0	0	0	0	0	0	0	0	0	0	0	0	0	0	0	0	0
C15orf57__chr15	2	0	0	0	0	1	0	1	0	0	0	2	1	0	0	1	0	0	0	1	0	0	0	0	0	0	0	1	0	3	0	1	0	0	0	0	3	1	3	0	0	0	0	1	0	0	1	0	0
C15orf61__chr15	0	0	2	1	0	2	0	0	3	0	1	2	0	1	1	1	0	0	0	0	1	0	1	1	0	2	0	0	0	0	1	1	4	0	1	1	2	0	1	0	5	3	3	2	0	0	0	0	0
C15orf62__chr15	0	0	0	0	0	0	0	0	0	0	0	0	0	0	0	0	0	0	0	0	0	0	0	0	0	0	0	0	0	0	0	0	0	0	0	0	0	0	0	0	0	0	0	0	0	0	0	0	0
C16orf11__chr16	0	0	0	0	0	0	0	0	0	0	0	0	0	0	0	0	0	0	0	0	0	0	0	0	0	0	0	0	0	0	0	0	0	0	0	0	0	0	0	0	0	0	0	0	0	0	0	0	0
C16orf13__chr16	2	2	3	1	0	2	3	2	0	0	1	3	0	1	1	3	0	2	3	1	0	0	0	0	1	1	4	0	1	1	6	3	3	0	2	1	1	1	2	4	2	0	4	2	0	0	0	2	3
C16orf45__chr16	0	1	0	0	0	0	0	0	1	0	1	3	0	3	2	3	0	1	1	0	3	0	0	0	2	2	3	0	0	1	3	0	1	0	1	1	1	0	2	1	0	0	0	2	0	0	0	2	1
C16orf46__chr16	0	0	0	0	0	0	0	0	0	0	0	0	0	0	0	0	0	0	0	0	0	0	0	0	0	0	0	0	0	0	0	0	0	1	1	0	0	0	1	0	0	0	0	0	0	0	0	0	0
C16orf52__chr16	1	0	2	2	0	0	1	0	1	0	0	2	0	1	1	1	0	0	0	0	1	0	2	0	0	1	0	0	1	2	2	4	1	1	2	1	0	0	1	4	2	0	1	0	0	0	0	2	1
C16orf54__chr16	0	0	0	0	0	0	0	0	0	0	0	0	0	0	0	0	0	0	0	0	0	0	0	0	0	0	0	0	0	0	0	0	0	0	0	0	0	0	0	0	0	0	0	0	0	0	0	0	0
C16orf55__chr16	0	0	0	2	0	0	1	0	3	0	2	0	2	1	0	0	0	0	0	0	0	0	0	0	0	1	0	2	0	1	1	0	1	0	1	2	0	0	3	2	1	1	1	0	0	1	0	1	0
C16orf58__chr16	1	2	3	0	0	4	1	1	2	0	2	6	5	2	6	5	1	1	1	2	0	1	1	0	7.01	3	4	3	1	2	3	7.01	6	0	4	3	6	1	10.01	3	0	1	3	5	0	0	0	3	0
C16orf59__chr16	0	0	0	0	0	0	0	0	2	0	0	0	0	0	1	0	0	1	1	1	1	0	0	0	1	0	0	0	1	0	0	0	0	0	1	1	0	0	2	0	0	0	0	0	0	0	0	0	0
C16orf62__chr16	4	2	1	0	0	2	1	1	1	0	1	1	4	0	1	0	0	1	0	0	1	0	0	0	1	3	3	2	0	2	4	1	1	0	2	1	1	1	4	3	0	2	5	3	0	0	1	0	1
C16orf70__chr16	1	0	0	0	0	1	0	0	3	0	1	0	0	0	2	0	0	0	2	0	0	0	1	0	0	0	0	0	1	2	0	3	1	0	0	0	0	0	2	2	0	0	0	0	0	0	1	0	1
C16orf71__chr16	0	0	0	0	0	0	0	0	0	0	0	0	0	0	0	0	0	0	0	0	0	0	0	0	0	0	0	0	0	0	0	0	0	0	0	0	0	0	0	0	0	0	0	0	0	0	0	0	0
C16orf72__chr16	1	1	4	3	0	5	5	1	1	0	2	4	2	4	6	1	1	1	5	2	0	0	1	0	1	5	6	6	3	3	9.01	2	3	0	8.01	2	4	6	4	4	3	4	1	5	0	0	5	6	2
C16orf74__chr16	0	0	0	0	0	1	0	0	2	0	1	0	0	1	0	0	0	1	0	0	0	0	1	0	0	1	2	0	0	1	0	1	0	0	0	0	0	0	1	0	0	1	0	2	0	0	0	1	0
C16orf80__chr16	3	5	4	0	0	3	4	4	3	0	3	2	2	2	4	1	0	4	1	2	2	0	0	3	3	1	4	3	2	5	5	2	4	0	10.01	4	2	4	6	6	4	3	8.01	4	0	0	0	9.01	3
C16orf86__chr16	0	0	0	0	0	0	0	0	0	0	0	1	0	0	0	0	0	0	0	0	0	0	0	0	0	0	0	0	0	0	0	0	0	0	0	0	0	0	0	0	0	0	0	0	0	0	0	0	0
C16orf87__chr16	0	0	1	0	0	0	0	1	0	0	0	0	0	1	1	0	0	0	0	0	0	0	0	0	0	0	0	0	0	0	0	0	0	0	1	0	1	1	0	0	0	0	0	1	0	0	1	0	1
C16orf88__chr16	0	0	1	0	0	0	0	0	1	0	0	0	1	0	0	1	0	3	5	0	0	0	1	0	1	2	3	0	1	0	0	4	2	0	1	1	0	3	1	1	1	2	1	1	0	0	1	0	1
C16orf91__chr16	0	0	0	0	0	0	0	0	0	0	1	1	0	0	5	0	0	1	2	0	0	0	1	1	0	0	1	0	1	5	0	0	2	0	0	0	1	0	0	1	1	1	1	0	0	0	1	0	1
C16orf93__chr16	0	0	0	0	0	0	0	0	0	0	0	0	0	0	0	0	0	0	0	0	0	0	1	0	0	0	0	0	0	0	0	0	0	0	0	1	0	0	0	0	0	0	0	0	0	0	0	0	0
C16orf95__chr16	1	0	0	0	0	0	1	0	0	0	0	0	1	1	1	0	0	1	0	0	0	0	0	0	0	2	0	0	1	0	0	0	2	0	1	0	1	0	2	1	0	3	0	1	0	0	1	0	0
C17orf100__chr17	1	0	0	0	0	0	0	0	0	0	0	2	0	0	0	0	0	0	0	0	0	0	0	0	0	1	0	0	0	0	0	0	0	0	0	0	0	0	0	0	0	0	0	0	0	0	0	0	0
C17orf102__chr17	0	0	0	0	0	0	0	0	0	0	0	0	0	0	0	0	0	0	0	0	0	0	0	0	0	0	0	0	0	0	0	0	0	0	0	0	0	0	0	0	0	0	0	0	0	0	0	0	0
C17orf103__chr17	0	0	0	0	0	0	0	0	0	0	0	0	0	0	0	0	0	0	0	0	0	0	0	0	0	0	0	0	0	1	0	0	0	0	0	0	0	0	0	0	0	0	0	0	0	0	0	0	1
C17orf104__chr17	0	0	0	0	0	0	0	0	0	0	0	0	0	0	0	0	0	0	0	0	0	0	0	0	0	0	0	0	0	0	0	0	0	0	0	0	0	0	0	0	2	0	0	0	0	0	0	0	1
C17orf107__chr17	0	0	0	0	0	0	0	0	0	0	0	0	0	0	0	0	0	0	0	0	0	0	0	0	0	0	0	0	0	0	0	0	1	0	0	0	0	0	0	0	0	0	0	0	0	0	0	0	0
C17orf49__chr17	0	0	0	0	0	1	0	0	0	0	0	0	0	0	0	0	0	0	0	0	0	0	0	0	0	0	0	0	0	0	0	0	0	0	0	0	1	0	0	0	0	0	0	0	0	0	1	0	0
C17orf51__chr17	0	0	0	0	0	0	0	0	2	0	0	0	0	2	0	0	0	1	0	0	0	0	0	0	2	0	0	0	0	3	2	1	1	1	0	0	0	0	1	0	0	0	0	0	0	0	0	1	0
C17orf53__chr17	0	0	1	0	0	0	0	0	0	0	0	0	0	0	0	1	0	2	0	0	0	0	0	0	1	0	0	0	0	0	0	0	1	0	1	0	1	1	0	2	0	0	0	1	0	0	0	0	0
C17orf58__chr17	0	0	0	0	0	0	0	0	0	0	0	2	0	1	0	0	0	0	0	0	1	0	0	0	0	0	2	0	1	2	2	1	1	0	1	1	0	0	1	0	1	0	0	1	0	0	0	0	1
C17orf59__chr17	0	0	0	0	0	1	0	0	0	0	0	0	0	0	0	0	0	0	0	0	0	0	1	0	0	1	0	0	0	0	0	0	0	0	0	1	0	0	0	0	0	1	0	0	0	0	0	0	0
C17orf62__chr17	1	0	0	0	0	0	1	0	1	0	1	1	0	2	0	2	0	0	0	0	0	0	0	0	3	3	1	0	2	2	3	3	4	0	6	0	1	0	2	3	2	0	0	0	0	0	0	3	1
C17orf67__chr17	0	0	1	0	0	0	0	0	0	0	0	0	0	0	0	1	0	0	0	0	1	0	0	0	0	0	0	2	0	1	0	1	0	0	0	1	0	0	0	1	1	0	0	0	0	0	1	0	1
C17orf70__chr17	0	2	1	0	0	0	0	0	0	0	0	0	0	0	1	0	0	0	0	0	0	0	0	0	0	0	1	0	0	0	1	1	1	0	0	0	0	0	0	0	0	2	0	1	0	0	0	1	1
C17orf72__chr17	0	0	0	0	0	0	0	0	0	0	0	0	0	0	0	0	0	0	0	0	0	0	0	0	0	0	0	0	0	1	0	0	0	0	0	0	0	0	0	0	0	0	0	0	0	0	0	0	0
C17orf74__chr17	0	0	0	0	0	0	0	0	0	0	0	0	0	0	0	0	0	0	0	0	0	0	0	0	0	0	0	0	0	0	0	0	0	0	0	0	0	0	0	0	0	0	0	0	0	0	0	0	0
C17orf75__chr17	2	0	1	2	0	1	1	0	0	0	0	1	0	1	1	0	0	0	2	1	0	0	2	0	0	0	1	2	1	2	1	0	3	1	1	0	2	0	0	3	2	1	0	2	0	0	4	2	1
C17orf76-AS1__chr17	6	10.01	7.01	6	0	19.04	14.02	7.01	14.02	1	18.04	45.24	7.01	18.04	39.18	20.05	1	21.05	15.03	18.04	4	3	11.01	10.01	21.05	19.04	24.07	22.06	22.06	75.69	40.19	30.11	51.31	17.03	36.15	22.06	32.12	11.01	39.18	20.05	27.09	20.05	25.07	32.12	0	2	10.01	16.03	30.11
C17orf77__chr17	0	0	0	0	0	1	0	0	1	0	0	0	0	0	0	0	0	1	1	0	0	0	1	0	0	0	0	0	0	0	0	0	0	0	0	0	1	0	1	0	0	0	0	0	0	0	0	0	0
C17orf80__chr17	2	0	2	0	0	1	0	0	2	0	1	1	0	1	0	1	0	0	1	2	1	0	5	0	2	1	1	0	1	1	2	4	2	0	1	0	0	1	5	2	0	1	0	0	0	0	1	0	0
C17orf82__chr17	0	0	0	0	0	0	0	0	0	0	0	0	0	0	0	0	0	0	0	0	0	0	0	0	0	0	0	0	0	0	0	0	0	0	0	0	0	0	0	1	0	0	0	0	0	0	0	0	0
C17orf85__chr17	0	1	4	2	0	0	2	1	3	0	0	1	0	3	4	7.01	0	1	0	0	1	1	2	0	4	2	3	1	0	5	8.01	4	5	1	4	0	1	2	9.01	2	1	4	1	7.01	1	0	0	1	1
C17orf89__chr17	2	1	2	1	0	3	5	1	6	0	2	6	0	2	1	5	0	5	2	4	1	0	2	1	2	1	6	6	1	13.02	5	5	6	4	7.01	6	8.01	7.01	8.01	5	4	5	3	6	0	0	6	3	6
C17orf96__chr17	0	0	0	0	0	1	1	0	0	0	0	0	0	1	0	0	0	0	0	0	0	0	0	0	0	0	0	0	0	1	0	0	0	0	0	0	0	0	0	0	0	0	0	0	0	0	0	1	0
C17orf97__chr17	0	0	1	1	0	0	0	0	0	0	0	1	0	0	0	0	0	0	2	0	0	0	1	0	1	0	0	0	0	1	1	1	2	1	1	0	1	1	1	1	1	2	0	0	0	0	0	0	0
C17orf98__chr17	0	0	0	0	0	0	0	0	0	0	0	0	0	0	0	0	0	0	0	0	0	0	0	0	0	0	0	0	0	0	0	0	0	0	0	0	0	0	0	0	0	0	0	0	0	0	0	0	0
C18orf21__chr18	0	1	0	0	0	0	0	0	0	0	0	0	0	0	1	0	0	0	1	0	0	0	1	0	1	1	2	0	1	1	1	0	1	0	1	0	1	0	1	0	2	0	1	2	0	0	0	0	1
C18orf25__chr18	1	0	0	1	0	3	1	0	1	1	0	4	1	1	0	0	0	0	1	0	0	0	0	0	0	0	0	2	0	0	1	0	1	3	2	2	0	1	3	1	0	0	1	3	0	0	2	1	1
C18orf32__chr18	1	0	0	0	0	0	0	0	0	0	0	0	1	0	0	0	0	0	1	0	0	0	0	0	1	0	0	0	1	0	0	0	0	0	0	0	0	0	0	0	0	1	0	0	0	0	0	0	0
C18orf54__chr18	5	3	1	1	0	2	4	1	5	0	0	2	3	0	0	1	0	5	0	3	0	0	4	4	1	0	0	1	2	8.01	6	5	3	2	7.01	2	6	6	7.01	8.01	5	5	1	6	0	0	1	5	1
C18orf56__chr18	1	0	1	0	0	0	0	0	0	0	0	0	0	0	0	0	0	0	0	0	0	0	0	0	0	0	0	0	0	0	0	0	0	2	0	0	0	0	0	0	0	0	1	0	0	0	0	0	0
C18orf61__chr18	0	0	1	0	0	0	0	0	0	0	0	0	0	0	0	0	0	0	0	0	0	0	0	0	0	0	0	0	0	0	0	0	0	0	0	0	0	0	0	0	0	0	0	0	0	0	0	0	0
C18orf8__chr18	0	0	0	0	0	1	0	0	0	0	0	2	2	0	2	0	0	0	0	0	0	0	1	0	0	1	1	0	0	3	0	4	1	0	2	0	2	2	3	0	0	1	4	0	0	0	0	0	1
C19orf10__chr19	2	6	6	0	0	5	8.01	0	10.01	0	6	2	5	6	12.02	2	0	11.01	6	3	0	2	4	3	6	1	6	0	1	5	3	9.01	15.03	1	7.01	3	6	3	6	12.02	1	8.01	9.01	4	1	0	2	1	13.02
C19orf12__chr19	0	1	1	1	0	2	1	0	1	0	0	0	1	0	4	0	0	0	0	1	0	0	0	0	2	1	1	1	0	1	0	1	1	0	3	0	0	0	0	1	0	1	0	0	0	0	0	0	0
C19orf18__chr19	0	0	0	0	0	0	0	0	0	0	0	0	0	0	0	1	0	0	0	0	0	0	0	0	0	0	0	0	0	0	0	0	0	0	0	0	0	0	0	0	0	0	0	0	0	0	0	0	0
C19orf24__chr19	0	1	2	1	0	1	1	2	2	0	2	1	0	5	2	0	0	0	0	0	0	0	1	0	3	1	4	2	2	2	7.01	4	6	3	1	3	3	1	1	1	0	0	2	3	0	0	0	3	2
C19orf25__chr19	1	0	0	0	0	1	0	2	1	0	1	3	2	3	1	0	0	2	2	1	0	0	0	0	2	0	1	1	0	3	6	5	2	0	2	1	0	0	3	2	0	0	2	0	0	0	0	2	0
C19orf26__chr19	0	0	0	0	0	0	0	0	0	0	0	0	0	0	0	0	0	0	0	0	0	0	0	0	0	0	0	0	0	0	0	0	0	0	0	0	0	0	0	0	0	0	0	0	0	0	0	0	0
C19orf33__chr19	0	0	0	0	0	1	0	0	0	0	0	0	0	0	0	0	0	0	0	0	0	0	0	0	0	0	0	0	0	1	0	0	0	0	0	0	0	0	0	0	0	0	0	0	0	0	0	0	0
C19orf40__chr19	0	0	0	0	0	0	1	0	0	0	0	0	0	0	0	0	0	0	0	0	0	0	0	0	0	0	0	0	0	0	0	0	1	0	1	0	1	0	0	1	0	0	0	0	0	0	0	0	0
C19orf43__chr19	4	3	2	1	0	3	5	5	7.01	0	3	14.02	3	3	8.01	10.01	0	7.01	3	3	0	0	3	1	7.01	1	4	4	3	15.03	6	18.04	5	2	9.01	6	6	8.01	8.01	9.01	4	7.01	7.01	9.01	0	0	4	9.01	4
C19orf44__chr19	0	0	0	0	0	0	0	0	0	0	0	0	0	0	0	0	0	0	0	0	0	0	0	0	0	0	0	0	0	0	0	1	1	0	0	1	0	1	0	0	0	0	0	0	0	0	0	0	0
C19orf47__chr19	0	0	0	1	0	0	0	0	4	0	0	0	0	0	0	0	0	0	3	1	0	0	1	0	3	0	2	1	1	2	2	0	2	0	3	0	0	0	4	0	0	1	1	1	0	0	0	0	0
C19orf48__chr19	0	0	3	0	0	3	3	0	2	0	4	5	2	4	6	3	0	2	0	0	0	0	1	0	6	0	1	1	2	7.01	3	3	8.01	2	3	1	9.01	0	7.01	5	0	4	4	3	0	0	3	3	0
C19orf52__chr19	0	2	1	0	0	0	0	0	1	0	2	1	1	1	0	0	0	0	0	0	1	0	0	0	2	0	2	1	1	2	3	1	1	0	1	1	0	0	1	1	1	0	1	1	0	0	0	0	0
C19orf53__chr19	6	3	4	0	0	1	7.01	1	3	0	0	10.01	6	3	2	4	0	6	2	4	0	0	2	3	6	6	5	1	1	6	9.01	9.01	11.01	4	6	10.01	7.01	8.01	5	1	5	6	2	5	0	1	2	5	7.01
C19orf54__chr19	0	0	2	0	0	0	0	0	0	0	0	2	1	0	2	1	0	0	1	0	1	0	0	0	0	1	0	1	1	2	1	2	1	0	1	0	2	0	0	1	1	0	1	2	0	0	0	0	0
C19orf55__chr19	0	0	0	0	0	0	0	0	0	0	0	0	0	0	0	0	0	1	1	0	0	0	0	0	0	0	0	1	0	0	1	0	0	0	0	0	0	0	0	1	0	0	0	0	0	0	0	0	0
C19orf57__chr19	0	0	0	0	0	0	0	0	0	0	0	0	0	0	0	0	0	0	0	0	0	0	0	0	1	0	0	0	0	0	0	0	0	0	0	0	0	0	1	0	0	0	0	0	0	0	0	0	0
C19orf60__chr19	2	1	0	0	0	0	0	0	0	0	0	0	1	1	3	1	0	1	2	0	0	0	0	0	1	2	0	0	0	3	1	1	2	0	1	1	3	0	1	1	0	3	4	4	0	0	0	0	2
C19orf66__chr19	1	2	0	0	0	2	0	0	0	0	0	1	0	2	1	0	0	4	0	1	1	0	0	0	4	1	2	0	1	2	2	2	1	1	2	1	5	2	1	2	1	0	3	0	0	0	0	0	3
C19orf6__chr19	0	0	1	0	0	1	1	0	4	0	1	6	0	0	4	1	1	0	0	1	0	0	2	0	1	2	4	1	2	1	5	3	2	0	6	2	1	1	1	1	0	1	3	1	0	0	0	1	2
C19orf70__chr19	1	1	0	0	0	2	4	0	3	0	3	4	0	2	3	4	0	1	1	1	2	0	0	0	0	1	1	3	2	4	3	6	2	0	0	0	1	2	1	2	4	2	6	1	0	0	2	3	2
C19orf73__chr19	0	0	0	0	0	0	0	0	0	0	0	0	0	0	0	0	0	0	0	0	0	0	0	0	0	0	0	0	0	0	0	1	0	0	0	0	0	0	0	0	0	0	0	0	0	0	0	0	0
C1D__chr2	1	0	3	1	0	5	3	1	3	0	0	10.01	2	5	1	2	0	3	1	1	0	1	1	0	5	0	1	3	1	5	2	2	1	0	5	3	1	1	4	1	3	1	2	1	1	1	2	1	4
C1GALT1C1__chrX	0	0	0	0	0	1	2	0	0	0	0	3	2	3	0	0	0	0	1	0	1	0	1	0	2	2	1	5	2	0	1	3	2	0	2	4	0	3	2	1	1	3	2	1	0	0	0	1	1
C1GALT1__chr7	2	2	2	0	0	0	3	1	1	0	4	6	2	4	9.01	2	0	6	3	1	1	0	3	2	3	5	5	1	3	6	5	7.01	3	3	4	11.01	1	2	12.02	4	3	3	3	11.01	0	0	4	2	3
C1QBP__chr17	6	6	8.01	1	0	10.01	3	1	8.01	0	18.04	18.04	10.01	12.02	13.02	12.02	0	9.01	5	6	3	1	6	3	7.01	12.02	19.04	7.01	4	23.06	20.05	16.03	11.01	6	15.03	13.02	7.01	8.01	15.03	12.02	9.01	8.01	12.02	15.03	1	0	7.01	7.01	10.01
C1QL1__chr17	0	0	4	0	0	2	1	5	5	0	3	2	0	5	5	6	0	5	3	1	0	0	7.01	4	3	3	5	0	0	5	3	12.02	4	0	7.01	4	8.01	5	16.03	8.01	0	8.01	8.01	5	0	1	0	5	2
C1QL4__chr12	0	0	0	0	0	0	0	0	0	0	0	0	0	0	0	0	0	0	0	0	0	0	0	0	0	0	0	0	0	0	0	0	0	0	0	0	0	0	0	0	0	0	0	0	0	0	0	0	0
C1QTNF1__chr17	0	0	0	0	0	0	0	0	0	0	0	0	0	0	0	0	0	0	0	0	0	0	0	0	0	0	0	0	0	0	0	0	0	0	0	0	0	0	0	0	0	0	0	0	0	0	0	0	0
C1QTNF2__chr5	0	0	0	0	0	1	1	0	0	0	0	0	0	0	0	0	0	0	0	0	0	0	0	0	0	0	1	0	0	2	0	0	0	0	1	0	0	0	0	1	0	0	1	0	0	0	0	0	0
C1QTNF3__chr5	0	0	0	0	0	0	0	0	0	0	0	0	0	0	0	0	0	0	0	0	0	0	0	0	0	0	0	0	0	0	0	0	0	0	0	0	0	0	0	0	0	0	0	0	0	0	0	0	0
C1QTNF6__chr22	0	0	0	0	0	0	0	0	0	0	0	0	0	0	1	0	0	0	0	0	0	0	1	0	0	0	0	0	0	0	0	0	0	0	0	0	3	0	4	0	0	1	0	0	0	0	0	0	1
C1QTNF7__chr4	0	0	0	0	0	0	0	0	0	0	0	0	0	0	0	0	0	0	0	0	0	0	0	0	0	0	0	0	0	0	0	0	0	0	0	0	0	0	0	0	0	0	0	0	0	0	0	0	0
C1QTNF9B-AS1__chr13	0	0	0	0	0	0	0	0	0	0	0	0	0	0	0	0	0	0	0	0	0	0	0	0	0	0	0	0	0	0	0	0	0	0	0	0	0	0	0	0	0	0	0	0	0	0	0	0	0
C1QTNF9__chr13	0	0	0	0	0	0	0	0	0	0	0	0	0	0	0	0	0	0	0	0	0	0	0	0	0	0	0	0	0	0	0	0	0	0	0	0	0	0	0	0	0	0	0	0	0	0	0	0	0
C1RL-AS1__chr12	0	1	0	0	0	0	0	0	0	0	0	0	0	0	0	0	0	0	1	0	0	0	0	0	0	0	0	0	0	0	0	0	0	0	0	0	1	0	0	0	0	1	0	1	0	0	0	0	0
C1RL__chr12	0	0	0	0	0	0	0	0	0	0	0	2	0	0	0	0	0	0	1	0	1	0	0	0	0	2	1	0	0	2	0	0	1	0	0	0	0	0	0	0	0	0	1	0	0	0	0	2	1
C1R__chr12	0	2	0	0	0	0	0	0	0	0	0	0	0	0	1	0	0	0	0	0	0	0	0	0	2	0	1	0	1	0	0	0	0	0	0	0	0	0	0	0	0	0	0	0	0	0	0	0	0
C1S__chr12	0	0	0	0	0	0	0	0	0	0	0	0	0	0	0	1	0	0	0	0	0	0	0	0	0	0	0	0	1	0	0	0	0	0	0	0	0	0	0	0	0	0	0	0	0	0	0	0	0
C1orf101__chr1	0	0	0	0	0	0	0	0	0	0	0	0	0	0	0	0	0	0	1	0	0	0	0	0	0	0	0	0	0	0	0	0	0	0	0	0	0	0	0	0	0	0	0	0	0	0	0	0	0
C1orf105__chr1	0	0	0	0	0	0	0	0	0	0	0	0	0	0	0	0	0	0	0	0	0	0	0	0	0	0	0	0	0	0	0	0	0	0	0	0	0	0	0	0	0	0	0	0	0	0	0	0	0
C1orf106__chr1	0	0	0	0	0	0	0	0	0	0	0	0	0	0	0	0	0	0	0	0	0	0	0	0	0	0	1	0	0	0	0	0	0	0	0	0	0	0	0	0	0	0	0	0	0	0	0	0	0
C1orf109__chr1	2	0	1	0	0	0	1	0	0	0	0	0	0	3	1	1	0	0	1	2	0	1	0	1	0	0	2	1	0	2	3	0	2	0	1	0	2	1	0	1	1	0	2	1	0	0	1	0	0
C1orf110__chr1	0	0	0	0	0	0	0	1	0	0	0	0	0	0	0	0	0	0	2	0	0	0	0	0	0	0	0	0	0	1	3	2	2	1	1	1	5	0	2	1	0	1	2	1	0	0	0	0	0
C1orf111__chr1	0	0	0	0	0	0	0	0	0	0	0	0	0	0	0	0	0	0	0	0	0	0	0	0	0	0	0	0	0	0	0	0	0	0	0	0	0	0	0	0	0	0	0	0	0	0	0	0	0
C1orf112__chr1	0	1	0	0	0	0	0	0	0	0	1	1	1	0	0	0	0	2	0	0	0	0	0	0	0	0	0	0	0	0	1	1	0	0	0	0	0	0	0	1	0	1	1	0	0	0	1	0	0
C1orf116__chr1	0	0	0	0	0	0	0	0	0	0	0	0	0	0	0	0	0	0	0	0	0	0	0	0	0	0	0	0	0	0	0	0	0	0	0	0	0	0	0	0	0	0	0	0	0	0	0	0	0
C1orf122__chr1	3	0	1	1	0	0	5	1	4	0	3	15.03	2	10.01	7.01	2	0	3	6	2	0	1	4	3	4	2	6	7.01	1	12.02	6	7.01	5	2	6	10.01	4	3	5	7.01	1	4	8.01	11.01	0	1	5	5	8.01
C1orf123__chr1	3	0	0	1	0	3	1	0	3	1	2	3	2	1	3	4	0	2	5	0	1	1	5	0	2	5	2	5	0	5	3	4	10.01	3	5	1	4	1	4	3	4	3	2	3	0	0	3	3	2
C1orf126__chr1	0	0	0	0	0	0	0	0	0	0	0	0	0	0	0	0	0	0	0	0	0	0	0	0	0	0	0	0	0	0	0	0	0	0	0	0	0	0	0	0	0	0	0	0	0	0	0	0	0
C1orf131__chr1	1	0	1	0	0	0	0	0	0	0	0	0	0	0	2	0	0	1	0	1	0	0	0	0	1	1	0	0	0	2	1	0	2	0	1	0	2	0	1	0	1	0	0	2	0	0	0	0	1
C1orf140__chr1	0	0	0	0	0	0	0	0	0	0	0	0	0	0	0	0	0	0	0	0	0	0	0	0	0	0	0	0	0	0	0	0	0	0	0	0	0	0	0	0	0	0	0	0	0	0	0	0	0
C1orf145__chr1	0	0	0	0	0	0	0	0	0	0	0	0	0	0	0	0	0	0	0	0	0	0	0	0	0	0	0	0	0	1	0	0	0	0	0	0	0	0	0	0	0	0	0	0	0	0	0	0	0
C1orf159__chr1	0	0	0	0	0	1	0	0	0	0	0	2	0	1	0	0	0	0	0	0	1	0	0	1	2	0	0	0	0	0	1	1	0	0	0	0	1	0	2	0	0	0	0	0	0	0	0	1	0
C1orf162__chr1	0	0	0	0	0	0	0	1	0	0	1	0	0	0	0	0	0	0	0	0	0	0	0	1	0	0	0	0	0	0	0	0	0	0	0	0	0	0	0	0	0	0	0	0	0	0	0	0	0
C1orf170__chr1	0	0	0	0	0	0	0	0	0	0	0	0	0	0	0	0	0	0	0	0	0	0	0	0	0	0	0	0	0	0	0	0	0	0	0	0	0	0	0	0	0	0	0	0	0	0	0	0	0
C1orf174__chr1	1	3	1	0	0	2	1	0	3	0	1	1	0	2	2	2	0	2	1	2	2	1	0	0	0	0	1	1	0	3	5	4	1	0	3	3	4	1	2	0	3	5	3	2	0	0	1	1	1
C1orf186__chr1	0	0	0	0	0	0	0	0	0	0	0	2	0	0	0	0	0	0	0	0	0	0	0	0	0	0	0	0	0	0	1	1	0	1	0	0	0	1	2	0	0	0	0	3	0	0	0	1	1
C1orf189__chr1	0	0	0	0	0	0	0	0	0	0	0	0	0	0	0	0	0	0	0	0	0	0	0	0	0	0	0	0	0	0	0	0	0	0	0	0	0	0	0	0	0	0	0	0	0	0	0	0	0
C1orf194__chr1	0	1	0	0	0	0	0	0	0	0	0	0	0	0	0	0	0	0	0	0	0	0	0	0	0	0	0	0	0	0	0	0	0	0	0	0	0	0	0	0	0	0	0	0	0	0	0	0	0
C1orf198__chr1	0	2	0	1	0	1	2	1	0	0	0	3	2	0	3	2	0	2	2	1	0	0	1	0	5	3	2	0	0	4	8.01	6	4	0	3	0	2	1	9.01	3	0	2	1	2	0	1	1	1	1
C1orf204__chr1	0	0	0	0	0	0	0	0	0	0	0	0	0	0	0	0	0	0	0	0	0	0	0	0	0	0	0	0	0	0	0	0	0	0	0	0	0	0	0	0	0	0	0	0	0	0	0	0	0
C1orf213__chr1	0	1	0	0	0	0	0	0	0	0	0	0	0	0	0	0	0	0	0	0	0	0	0	0	0	0	0	0	0	0	0	0	1	0	0	0	0	0	0	0	1	0	0	1	0	0	0	0	0
C1orf216__chr1	0	0	0	0	0	1	0	0	1	0	0	1	0	1	1	0	0	0	0	1	0	0	0	0	1	0	0	0	0	2	0	1	0	0	0	0	0	0	1	1	0	1	0	1	0	0	0	0	0
C1orf21__chr1	2	3	2	4	0	3	3	2	4	0	0	2	2	4	4	4	1	4	1	2	3	4	0	0	7.01	3	3	5	1	4	3	2	5	1	5	4	0	2	5	2	2	2	4	7.01	0	0	4	1	6
C1orf220__chr1	0	0	0	0	0	0	0	0	1	0	0	0	0	0	1	0	0	0	0	0	0	0	0	0	0	0	0	0	0	0	0	0	0	0	0	0	0	0	0	0	0	0	0	0	0	0	0	0	0
C1orf226__chr1	0	1	0	0	0	1	0	0	1	0	0	0	0	0	0	1	0	0	0	0	0	0	0	0	0	0	0	0	0	2	3	0	0	0	2	0	0	1	4	0	0	0	0	0	0	0	0	0	0
C1orf227__chr1	0	0	0	0	0	0	0	0	0	0	0	0	0	0	0	0	0	0	0	0	0	0	0	0	0	0	0	0	0	0	0	0	0	0	0	0	0	0	0	0	0	0	0	0	0	0	0	0	0
C1orf228__chr1	0	0	0	0	0	0	0	0	0	0	0	0	0	0	0	0	0	0	0	0	0	0	0	0	0	0	0	0	0	0	0	0	0	0	0	0	0	0	0	0	0	0	0	0	0	0	0	0	0
C1orf229__chr1	0	0	0	0	0	0	0	0	0	0	0	0	0	0	0	0	0	0	0	0	0	0	0	0	0	0	0	0	0	0	0	0	0	0	0	0	0	0	0	0	0	0	0	0	0	0	0	0	0
C1orf233__chr1	0	0	0	0	0	0	0	0	0	0	0	0	0	0	0	0	0	0	0	0	0	0	0	0	0	0	0	0	0	0	0	0	0	0	0	0	0	0	1	0	0	0	0	0	0	0	0	0	0
C1orf27__chr1	3	0	2	0	0	3	0	1	0	0	3	6	1	1	0	0	0	0	0	1	0	2	0	0	1	0	1	4	0	1	3	5	1	0	1	0	1	2	1	4	0	4	3	5	0	0	0	0	0
C1orf35__chr1	0	0	2	1	0	2	2	0	0	0	0	1	0	2	3	0	0	1	1	0	0	0	0	0	1	0	1	2	0	0	2	3	0	1	1	0	0	1	0	0	0	0	0	0	0	0	0	1	0
C1orf43__chr1	5	7.01	4	8.01	0	3	4	3	8.01	0	5	28.09	9.01	13.02	9.01	5	0	14.02	5	4	4	0	2	0	10.01	4	12.02	4	3	24.07	18.04	14.02	12.02	7.01	12.02	8.01	7.01	6	20.05	10.01	7.01	14.02	10.01	13.02	1	0	9.01	4	13.02
C1orf50__chr1	0	0	1	0	0	1	0	0	1	0	0	0	0	1	1	0	0	1	0	0	0	0	0	0	0	0	0	0	0	0	0	0	0	0	0	0	2	1	0	0	0	0	0	1	0	0	0	0	0
C1orf51__chr1	0	1	0	1	0	0	0	0	0	0	0	0	0	0	0	0	0	1	0	0	1	0	0	1	0	0	0	0	0	0	1	0	0	0	0	0	0	0	0	0	0	1	1	0	0	0	0	0	0
C1orf52__chr1	1	0	1	0	0	0	0	1	0	0	0	1	1	0	1	2	0	1	1	0	0	0	1	0	1	0	2	1	0	1	2	2	4	2	1	1	0	1	2	0	2	0	0	1	0	0	0	1	1
C1orf53__chr1	1	1	0	0	0	0	0	0	0	0	0	0	0	0	0	0	0	1	0	0	0	1	0	1	1	0	1	0	1	1	1	0	0	1	1	0	0	0	0	2	0	0	0	1	0	0	0	2	0
C1orf54__chr1	0	2	0	0	0	0	0	0	0	0	0	0	0	0	0	0	0	0	0	0	0	0	0	0	0	0	0	0	0	0	0	0	0	0	0	0	0	0	0	0	0	0	0	0	0	0	0	0	0
C1orf56__chr1	0	0	0	0	0	0	0	0	1	0	0	1	0	1	0	0	0	0	0	0	0	0	0	0	0	0	0	0	0	0	0	0	1	0	0	0	0	1	0	0	0	0	0	0	0	0	0	1	0
C1orf63__chr1	0	0	1	0	0	0	0	0	0	0	0	3	0	0	0	0	0	0	1	0	0	0	1	0	0	1	0	2	0	1	1	1	0	2	1	1	0	0	1	2	0	1	3	1	0	0	1	2	5
C1orf74__chr1	0	0	0	0	0	0	1	0	0	0	0	0	0	0	0	0	0	1	0	0	0	0	0	0	0	0	0	1	0	0	2	0	0	0	2	0	0	0	0	0	0	0	0	0	0	0	0	0	0
C1orf85__chr1	0	0	1	0	0	0	0	0	0	0	0	0	0	1	2	0	0	0	0	0	0	0	0	0	1	0	1	0	0	0	1	0	1	0	0	1	1	0	0	0	0	0	0	0	0	0	1	1	0
C1orf86__chr1	0	4	6	0	0	1	0	1	2	0	3	2	1	2	3	1	0	3	1	0	0	0	1	0	1	1	0	0	5	5	0	2	8.01	1	1	1	2	2	3	6	1	3	4	1	0	0	0	0	4
C20orf111__chr20	1	1	1	0	0	0	0	0	0	0	0	4	0	2	0	0	0	0	1	1	0	0	1	0	2	0	2	2	0	3	1	1	1	0	0	0	1	0	3	1	0	5	3	2	0	0	2	0	0
C20orf112__chr20	0	0	1	0	0	0	0	0	2	0	1	0	0	0	0	0	0	0	0	1	0	0	0	0	0	0	2	0	0	0	1	0	1	0	0	0	1	0	1	0	0	0	0	0	0	0	0	0	0
C20orf118__chr20	0	0	0	0	0	0	0	0	0	0	0	0	0	0	0	0	0	0	0	0	0	0	0	0	0	0	0	0	0	0	0	0	0	0	0	0	0	0	0	0	0	0	0	0	0	0	0	0	0
C20orf166-AS1__chr20	0	0	0	0	0	0	0	0	0	0	0	0	0	0	0	0	0	0	0	0	0	0	0	0	0	0	0	0	0	0	0	0	0	0	0	0	0	0	0	0	0	0	0	0	0	0	0	0	0
C20orf194__chr20	0	0	0	1	0	0	2	1	1	0	0	1	0	1	0	1	0	1	0	0	0	0	0	0	0	1	0	0	0	0	1	0	0	0	0	0	0	1	0	1	1	0	1	1	0	0	0	0	0
C20orf196__chr20	0	0	0	0	0	0	1	0	0	0	0	0	0	0	0	0	0	0	0	0	0	0	0	0	0	0	0	0	0	0	0	0	0	0	0	0	0	0	0	0	0	0	0	0	0	0	0	0	0
C20orf201__chr20	0	0	0	0	0	0	0	0	0	0	0	0	0	0	0	0	0	0	0	0	0	0	0	0	0	0	0	0	0	0	0	0	0	0	0	0	0	0	0	0	0	0	0	0	0	0	0	0	0
C20orf203__chr20	0	0	0	0	0	0	0	0	0	0	0	0	0	0	0	0	0	0	0	0	0	0	0	0	0	0	0	0	0	0	0	0	0	0	0	0	0	0	0	0	0	0	0	0	0	0	0	0	0
C20orf24__chr20	0	0	0	0	0	0	0	0	0	0	0	0	0	0	0	0	0	0	0	0	0	0	0	0	0	0	0	0	0	0	0	0	0	0	1	0	0	0	0	0	0	0	0	0	0	0	0	0	0
C20orf27__chr20	2	2	3	1	0	2	2	2	3	0	5	3	1	3	6	5	0	1	1	1	3	0	3	1	2	4	5	1	5	4	3	8.01	8.01	1	3	3	2	2	4	5	2	4	5	8.01	0	0	2	1	1
C20orf96__chr20	0	0	0	0	0	0	0	0	0	0	0	1	0	0	0	0	0	0	0	0	0	0	1	0	0	0	0	0	0	0	0	1	0	0	1	0	1	0	0	0	0	1	1	0	0	0	0	0	0
C21orf119__chr21	0	0	0	0	0	0	0	0	0	0	0	0	0	0	0	0	0	0	0	0	0	0	0	0	0	0	0	0	0	0	0	0	0	0	0	0	0	0	0	0	0	0	0	0	0	0	0	1	0
C21orf15__chr21	0	0	0	0	0	0	0	0	0	0	0	0	0	0	0	0	0	0	0	0	0	0	0	0	0	0	0	0	0	0	0	0	0	0	0	0	0	0	0	0	0	0	0	0	0	0	0	0	0
C21orf2__chr21	0	0	0	0	0	0	0	0	0	0	0	1	0	0	1	1	0	0	0	0	0	0	3	0	1	0	0	0	0	0	0	0	0	0	0	0	1	1	1	0	0	0	0	0	0	0	0	0	0
C21orf33__chr21	1	1	1	0	0	0	0	0	1	0	0	2	0	1	3	1	0	2	0	1	0	0	2	2	0	2	0	0	0	1	2	1	1	0	0	0	0	1	2	0	0	3	0	4	0	0	0	1	3
C21orf49__chr21	0	0	0	0	0	0	0	0	0	0	0	0	0	0	0	0	0	0	0	0	0	0	0	0	0	0	0	0	0	0	0	0	0	0	0	0	0	0	0	0	0	0	0	0	0	0	0	0	0
C21orf58__chr21	0	0	0	0	0	1	2	0	0	0	0	1	0	0	2	0	0	0	0	0	0	0	1	0	0	0	0	0	0	2	3	3	1	0	2	0	0	1	1	3	0	0	0	0	0	0	0	1	0
C21orf59__chr21	2	2	2	3	0	7.01	2	0	1	0	0	5	4	4	5	1	0	8.01	1	1	0	3	1	2	6	3	1	5	3	6	2	3	6	2	8.01	3	6	3	5	3	2	6	5	7.01	0	0	1	2	3
C21orf62__chr21	0	0	0	0	0	1	0	0	0	0	0	0	0	0	0	0	0	0	0	0	0	0	0	0	0	0	0	0	0	0	1	0	0	0	0	0	0	0	0	0	0	0	0	0	0	0	0	0	0
C21orf67__chr21	0	0	0	0	0	0	0	0	0	0	0	0	0	0	0	0	0	0	0	0	0	0	0	0	0	0	0	0	0	0	0	0	0	0	0	0	0	0	0	0	0	0	0	0	0	0	0	0	0
C21orf7__chr21	0	0	1	0	0	0	0	1	0	0	0	0	0	0	0	0	0	0	0	0	0	0	0	0	1	0	0	0	0	2	0	3	0	0	1	0	1	0	2	0	0	0	0	0	0	0	1	1	2
C21orf88__chr21	0	0	0	0	0	0	0	0	0	0	0	0	0	0	1	0	0	0	0	0	0	0	0	0	0	0	0	0	0	0	0	0	0	0	0	0	0	0	0	0	0	0	0	1	0	0	0	0	0
C21orf91__chr21	0	0	0	0	0	3	2	0	1	0	0	0	0	0	2	0	0	0	1	0	0	0	0	0	0	1	1	2	0	2	0	1	1	0	1	0	0	0	0	0	0	0	0	0	0	0	0	0	0
C22orf23__chr22	0	0	0	0	0	0	0	0	0	0	0	0	0	0	0	0	0	0	0	0	0	0	0	0	0	0	1	0	0	1	0	0	0	0	0	0	0	0	0	0	0	0	0	0	0	0	0	0	0
C22orf24__chr22	0	0	0	0	0	0	0	0	0	0	0	0	0	0	0	0	0	0	0	0	0	0	0	0	0	0	0	0	0	0	0	0	0	0	0	0	0	0	0	0	0	0	0	0	0	0	0	0	0
C22orf26__chr22	0	0	0	0	0	0	0	0	0	0	0	0	0	0	0	0	0	0	0	0	0	0	0	0	0	0	0	0	0	0	0	0	0	0	0	0	0	0	0	0	0	0	0	0	0	0	0	0	0
C22orf28__chr22	1	5	2	0	0	5	7.01	1	5	0	4	6	3	3	6	2	0	6	1	3	2	0	4	0	7.01	4	3	3	1	10.01	10.01	10.01	6	3	3	3	4	4	13.02	3	1	6	6	6	0	1	5	2	1
C22orf29__chr22	0	0	1	0	0	1	1	0	0	0	0	1	1	0	2	0	0	2	0	0	1	0	0	0	1	0	2	1	0	1	1	1	2	0	1	2	1	2	6	1	0	0	1	3	0	0	0	1	1
C22orf32__chr22	1	2	2	1	1	1	0	0	1	0	1	4	1	1	1	1	0	0	0	1	0	0	3	0	1	2	4	2	1	8.01	1	2	4	0	5	2	4	1	1	1	2	4	1	1	0	0	1	2	5
C22orf34__chr22	0	0	0	0	0	0	0	0	0	0	0	0	0	0	0	0	0	0	0	0	0	0	0	0	0	0	0	0	0	0	0	0	0	0	0	0	0	0	0	0	0	0	0	0	0	0	0	0	0
C22orf39__chr22	2	1	3	0	0	3	1	1	1	0	0	4	0	0	1	0	0	0	0	1	0	0	1	0	0	0	1	0	0	0	1	1	0	3	2	2	1	4	2	2	1	3	6	4	0	0	0	2	0
C22orf43__chr22	0	0	0	0	0	0	0	0	0	0	0	0	0	0	0	0	0	0	0	0	0	0	0	0	0	0	0	0	0	0	0	0	0	0	0	0	0	0	0	0	0	0	0	0	0	0	0	0	0
C22orf46__chr22	0	0	0	0	0	0	0	0	0	0	0	0	0	0	0	0	0	0	0	0	0	0	0	0	0	0	0	0	0	0	1	0	0	0	0	0	2	0	0	0	0	0	0	1	0	0	0	0	0
C2CD2L__chr11	1	0	0	0	0	0	0	0	2	0	0	0	0	0	0	0	0	0	0	0	0	0	0	0	0	0	1	0	0	0	1	1	2	0	0	0	0	1	3	0	1	0	0	0	0	0	0	1	0
C2CD2__chr21	2	3	0	2	0	0	1	2	4	0	0	2	1	2	0	0	0	1	1	0	0	1	0	0	1	1	0	0	0	0	0	0	1	0	1	1	1	0	0	0	0	0	1	0	0	0	0	0	0
C2CD3__chr11	0	0	0	0	0	0	0	0	1	0	0	0	0	0	0	0	0	0	0	0	0	0	0	0	0	0	0	0	0	0	0	0	1	0	1	0	0	1	0	0	0	0	0	0	0	0	0	0	0
C2CD4A__chr15	0	0	0	0	0	0	0	0	0	0	0	0	0	0	0	0	0	0	0	0	0	0	0	0	0	0	0	0	0	0	0	0	0	0	0	0	0	0	0	0	0	0	0	0	0	0	0	0	0
C2CD4C__chr19	0	0	0	0	0	0	0	0	0	0	0	2	0	0	0	0	0	0	0	0	0	0	0	0	0	0	0	0	0	0	0	0	0	0	0	0	0	0	0	0	0	0	0	0	0	0	0	0	0
C2CD5__chr12	2	0	1	0	0	0	0	0	0	0	0	2	3	1	4	0	0	3	0	0	0	0	2	0	0	0	2	2	1	0	3	5	0	0	2	1	2	1	2	3	0	1	1	4	0	0	0	0	0
C2__chr6	0	0	0	0	0	0	0	0	0	0	0	0	0	0	0	0	0	0	0	0	0	0	0	0	0	0	0	0	0	0	0	0	0	0	0	0	0	0	0	0	0	0	0	0	0	0	0	0	0
C2orf15__chr2	0	0	0	0	0	0	0	0	0	0	0	0	0	0	0	0	0	0	0	0	0	0	0	0	0	0	0	0	0	0	0	0	0	0	0	0	0	0	0	0	0	0	0	0	0	0	0	0	0
C2orf27A__chr2	0	0	0	0	0	0	0	0	0	0	0	0	0	0	0	0	0	0	0	0	0	0	0	0	0	0	0	0	0	0	0	0	0	0	0	0	0	0	0	0	0	0	0	0	0	0	0	0	0
C2orf29__chr2	2	2	3	0	0	1	0	2	3	0	0	6	0	3	2	1	0	0	2	3	0	0	1	0	1	2	1	2	0	4	1	5	6	1	2	0	2	4	6	2	0	4	2	0	0	0	4	2	1
C2orf42__chr2	0	0	1	0	0	1	1	0	0	0	1	0	0	0	0	0	0	1	1	0	0	0	0	0	2	0	1	0	1	1	1	1	0	1	0	1	0	0	1	1	0	0	0	1	0	0	0	0	1
C2orf43__chr2	0	0	0	0	0	0	0	0	1	0	0	1	1	0	1	1	0	0	0	0	0	0	1	1	0	0	0	0	0	1	2	0	0	0	1	0	0	0	0	0	0	1	0	3	0	0	0	0	0
C2orf44__chr2	0	0	0	0	0	0	0	0	0	0	0	1	0	0	0	1	0	0	2	0	0	0	0	1	0	0	1	0	0	1	0	0	2	1	0	0	0	1	0	1	1	0	0	1	0	0	0	0	2
C2orf47__chr2	2	0	0	0	0	0	1	0	1	0	1	4	3	2	1	4	0	0	3	3	0	0	0	6	0	0	1	1	2	1	2	3	3	1	0	2	4	1	6	3	0	1	5	6	0	0	0	1	1
C2orf48__chr2	0	0	0	0	0	0	0	0	0	0	0	0	0	0	0	0	0	0	0	0	0	0	0	0	0	0	0	0	0	0	0	0	0	0	0	0	0	0	0	0	0	0	0	0	0	0	0	0	0
C2orf49__chr2	1	0	0	0	0	0	0	0	0	0	0	1	0	0	1	0	0	0	1	1	0	0	0	0	0	0	1	0	1	1	0	1	0	0	0	1	0	0	1	0	0	0	1	1	0	0	0	0	0
C2orf54__chr2	0	0	0	0	0	0	0	0	0	0	0	0	0	0	0	0	0	0	0	0	0	0	0	0	0	0	0	0	0	0	0	0	0	0	0	0	0	0	0	0	0	0	0	0	0	0	0	0	0
C2orf61__chr2	0	0	0	0	0	0	0	0	0	0	0	0	0	0	0	0	0	0	0	0	0	0	0	0	0	0	0	0	0	0	0	0	0	0	0	0	0	0	0	0	0	0	0	0	0	0	0	0	0
C2orf65__chr2	0	0	0	0	0	0	0	0	0	0	0	0	0	0	0	0	0	0	0	0	0	0	0	0	0	0	0	0	0	0	0	0	0	0	0	0	0	0	0	0	0	1	0	0	0	0	0	0	0
C2orf66__chr2	0	0	0	0	0	0	0	0	0	0	0	0	0	0	0	0	0	0	0	0	0	0	0	0	0	0	0	0	0	0	0	0	0	0	0	0	0	0	0	0	0	0	0	0	0	0	0	0	0
C2orf68__chr2	0	1	0	0	0	4	0	0	2	0	0	1	0	1	1	0	0	1	0	0	0	0	0	0	1	1	0	1	1	2	3	1	1	0	1	0	1	1	2	1	1	2	1	1	0	0	0	0	4
C2orf69__chr2	0	2	6	3	0	4	6	1	4	0	2	7.01	2	3	1	6	0	1	0	0	2	1	6	1	2	0	1	4	0	14.02	9.01	10.01	7.01	3	12.02	10.01	7.01	2	10.01	9.01	3	7.01	9.01	7.01	0	0	7.01	7.01	7.01
C2orf70__chr2	0	0	0	0	0	0	0	0	0	0	0	0	0	0	0	0	0	0	0	0	0	0	0	0	0	0	0	0	0	0	0	0	0	0	0	0	0	0	0	0	0	0	0	0	0	0	0	0	0
C2orf73__chr2	0	0	0	0	0	0	0	0	0	0	0	0	0	0	0	0	0	0	0	0	0	0	0	0	0	0	0	0	0	0	0	0	0	0	0	0	0	0	0	0	0	0	0	0	0	0	0	0	0
C2orf74__chr2	0	0	1	0	0	0	1	0	0	0	0	0	0	1	0	2	0	0	0	0	1	0	0	0	0	0	1	0	1	0	1	0	0	0	2	0	0	0	0	0	0	0	0	3	0	0	1	0	0
C2orf76__chr2	0	0	0	0	0	0	0	0	0	0	0	0	0	0	0	0	0	0	0	0	1	0	0	0	0	0	0	0	0	0	0	0	0	0	0	0	0	0	0	0	0	0	0	0	0	0	1	0	0
C2orf78__chr2	0	0	0	0	0	0	0	0	0	0	0	0	0	0	0	0	0	0	0	0	0	0	0	0	0	0	0	0	0	0	0	0	0	0	0	0	0	0	0	0	0	0	0	0	0	0	0	0	0
C2orf81__chr2	0	0	0	0	0	0	0	0	0	0	0	0	0	0	0	1	0	0	1	0	0	0	0	0	0	0	0	0	0	0	0	0	0	0	0	0	0	0	0	0	0	0	0	0	0	0	0	0	0
C2orf82__chr2	0	0	0	0	0	0	0	0	0	0	0	0	0	0	0	0	0	0	0	0	0	0	0	0	0	0	0	0	0	0	0	0	0	0	0	0	0	0	0	0	0	0	0	0	0	0	0	0	0
C2orf88__chr2	0	0	0	0	0	0	0	0	0	0	0	0	0	0	0	0	0	0	0	0	0	0	0	0	0	0	0	0	0	0	0	0	1	0	0	0	0	0	0	0	0	0	0	0	0	0	0	0	0
C2orf91__chr2	0	0	0	0	0	0	0	0	0	0	0	0	0	0	0	0	0	1	0	0	0	0	0	0	0	0	0	0	0	0	0	0	0	0	0	1	0	0	0	0	0	0	2	0	0	0	0	1	0
C3AR1__chr12	0	0	0	0	0	0	0	0	0	0	0	0	0	0	0	0	0	0	1	0	0	0	0	0	0	0	0	0	0	0	0	0	0	0	0	0	0	0	0	0	0	0	0	0	0	0	0	0	0
C3__chr19	0	0	0	0	0	0	0	0	0	0	0	0	0	0	0	0	0	0	0	0	0	0	0	0	0	0	0	0	0	0	0	0	0	0	0	0	0	0	0	0	0	0	0	0	0	0	0	0	0
C3orf14__chr3	0	0	1	0	0	0	0	0	1	0	3	0	0	0	0	0	0	0	1	0	0	0	0	0	1	0	0	0	0	0	0	0	0	0	2	0	0	2	0	0	0	0	3	0	0	0	0	0	0
C3orf17__chr3	4	3	1	1	0	0	1	0	0	0	1	4	0	2	2	1	0	0	0	0	1	0	3	0	2	0	1	1	0	1	3	2	3	2	3	1	3	3	1	2	0	1	1	1	0	0	2	0	2
C3orf18__chr3	0	0	0	0	0	0	0	0	0	0	0	1	0	0	0	0	0	0	0	0	0	0	0	0	0	0	0	0	0	0	0	0	0	0	1	0	0	1	0	0	0	0	1	0	0	0	0	0	0
C3orf20__chr3	0	0	0	0	0	0	0	0	0	0	0	0	0	0	0	0	0	0	0	0	0	0	0	0	0	0	0	0	0	0	0	0	0	0	0	0	0	0	0	0	0	0	0	0	0	0	0	0	0
C3orf33__chr3	0	0	0	0	0	0	0	0	0	0	0	0	0	1	0	0	0	0	0	0	0	0	0	0	0	0	0	0	0	0	0	0	0	0	0	0	0	0	1	0	0	0	1	1	0	0	1	0	0
C3orf35__chr3	0	0	0	0	0	0	0	0	0	0	0	0	0	0	0	0	0	0	0	0	0	0	0	0	0	0	0	0	0	0	0	0	0	0	0	0	0	0	0	0	0	0	0	0	0	0	0	0	0
C3orf37__chr3	1	2	0	0	0	1	1	1	1	0	0	2	1	2	2	0	0	5	1	0	2	0	1	0	1	0	0	0	1	0	0	3	2	1	5	0	3	0	2	3	1	0	0	2	0	0	0	0	0
C3orf38__chr3	0	0	0	0	0	1	1	1	0	0	0	2	0	1	1	1	0	0	0	1	0	0	0	0	0	0	1	0	0	0	2	1	2	2	1	1	0	2	3	3	1	0	1	1	0	0	0	1	0
C3orf43__chr3	0	0	0	0	0	0	0	0	0	0	0	0	0	0	0	0	0	0	0	0	0	0	0	0	0	0	0	0	0	0	0	0	0	0	0	0	0	0	0	0	0	0	0	0	0	0	0	0	0
C3orf49__chr3	0	0	0	0	0	0	0	0	0	0	0	0	0	0	0	0	0	0	0	0	0	0	0	0	0	0	0	0	0	0	0	0	0	0	0	0	0	0	0	0	0	0	0	0	0	0	0	0	0
C3orf52__chr3	0	0	0	1	0	1	1	0	0	0	0	1	0	0	0	0	0	0	0	0	0	0	0	0	0	0	1	1	0	4	0	2	1	0	1	1	0	1	0	0	0	0	1	0	0	0	1	1	0
C3orf55__chr3	0	1	0	1	0	0	0	1	1	0	0	1	0	0	0	0	0	0	0	0	0	0	1	1	0	0	0	0	0	0	1	0	1	0	0	0	0	3	0	0	0	0	1	0	0	0	0	0	2
C3orf58__chr3	1	0	1	1	0	0	0	0	3	0	0	2	1	0	3	1	0	4	1	1	0	0	1	1	3	0	0	0	0	1	1	0	1	0	2	0	2	1	0	0	2	0	1	0	0	0	1	0	2
C3orf62__chr3	0	2	2	0	0	0	0	1	0	0	1	0	1	0	1	2	0	0	0	0	0	0	0	0	2	2	0	0	0	2	0	0	1	0	0	0	0	0	1	0	1	0	0	1	0	0	0	0	1
C3orf67__chr3	1	0	0	0	0	0	0	0	0	0	0	0	0	0	0	0	0	0	0	0	0	0	0	0	1	0	0	0	0	0	0	0	0	0	0	0	1	0	0	0	0	0	0	0	0	0	0	0	0
C3orf70__chr3	0	0	0	0	0	0	0	0	0	0	0	0	0	0	0	0	0	0	0	0	0	0	0	0	0	0	0	0	0	0	0	0	0	0	1	0	0	0	0	0	0	0	0	0	0	0	0	0	0
C3orf72__chr3	0	0	0	0	0	0	0	0	0	0	0	0	0	1	0	0	0	0	1	0	0	0	0	1	0	0	0	0	0	0	0	0	0	0	0	0	0	0	0	0	0	0	0	0	0	0	0	0	0
C3orf80__chr3	0	0	0	0	0	0	0	0	0	0	0	0	0	0	0	0	0	0	0	0	0	0	0	0	0	0	0	0	0	0	0	0	0	0	0	0	0	0	0	0	0	0	0	0	0	0	0	0	0
C4orf19__chr4	0	0	0	0	0	0	0	0	0	0	0	0	0	0	0	0	0	0	0	0	0	0	0	0	0	0	0	0	0	0	0	0	0	0	0	0	0	0	0	1	0	0	0	1	0	0	0	0	0
C4orf21__chr4	0	0	0	0	0	0	0	1	0	0	0	0	0	1	1	0	0	1	0	1	3	0	1	0	1	0	0	1	1	0	1	0	2	0	0	1	1	1	2	0	1	0	0	0	0	0	1	0	0
C4orf22__chr4	0	0	0	0	0	0	0	0	0	0	0	0	0	0	1	0	0	0	0	0	1	0	0	0	0	0	0	0	0	0	0	1	0	0	0	0	0	0	0	0	0	0	0	0	0	0	0	0	0
C4orf26__chr4	0	0	0	0	0	0	0	0	0	0	0	0	0	0	0	0	0	0	0	0	0	0	0	0	0	0	0	0	0	0	0	0	0	0	0	0	0	0	0	0	0	0	0	0	0	0	0	0	0
C4orf27__chr4	0	2	2	1	0	1	2	1	2	0	1	4	0	3	1	1	0	4	5	0	0	0	1	0	5	3	3	4	0	5	2	2	0	0	3	3	2	4	1	1	1	5	5	2	0	0	3	4	0
C4orf29__chr4	0	0	0	0	0	0	0	0	0	0	1	0	0	0	0	1	0	0	0	1	0	0	0	0	0	0	0	0	0	0	2	1	0	0	0	1	1	0	0	2	0	0	1	1	0	0	0	0	0
C4orf32__chr4	0	0	0	0	0	0	0	0	0	0	0	0	0	0	0	0	0	0	0	0	0	0	0	0	0	0	0	1	0	2	0	0	0	0	1	0	0	0	0	0	0	0	1	0	0	0	0	0	0
C4orf33__chr4	0	0	1	0	0	0	0	0	0	0	0	1	0	1	1	0	0	0	0	0	0	0	0	0	0	0	0	2	0	0	0	1	0	0	0	0	1	0	1	0	0	0	1	0	0	0	0	0	1
C4orf36__chr4	0	0	0	0	0	0	0	0	0	0	0	0	0	0	0	0	0	0	0	0	0	0	0	0	0	0	0	0	0	0	0	0	0	0	0	0	0	0	0	0	0	0	0	0	0	0	0	0	0
C4orf3__chr4	1	6	2	0	0	6	7.01	3	1	0	2	7.01	2	5	5	2	0	2	4	1	2	0	2	3	5	5	3	0	0	9.01	2	7.01	6	3	7.01	4	8.01	5	13.02	6	1	8.01	0	2	0	0	5	3	10.01
C4orf40__chr4	0	0	0	0	0	0	0	0	0	0	0	0	0	0	0	0	0	0	0	0	0	0	0	0	0	0	0	0	0	0	0	0	0	0	0	0	0	0	0	0	0	0	0	0	0	0	0	0	0
C4orf46__chr4	6	2	2	0	0	2	5	1	0	0	1	3	0	4	1	2	0	0	2	1	2	0	0	3	1	0	1	2	3	10.01	6	1	6	4	7.01	2	3	8.01	8.01	2	4	2	6	10.01	0	0	0	6	1
C4orf47__chr4	0	0	0	0	0	0	0	0	0	0	0	0	0	0	0	0	0	1	0	0	0	0	0	0	0	0	0	0	0	0	0	0	0	0	0	0	0	0	0	0	0	0	0	0	0	0	0	0	0
C4orf48__chr4	2	1	4	1	1	9.01	7.01	0	6	0	2	2	1	1	4	3	0	4	1	5	1	1	3	0	2	4	3	0	7.01	8.01	7.01	9.01	12.02	0	7.01	8.01	7.01	3	5	1	0	5	7.01	3	1	1	0	1	4
C4orf52__chr4	0	0	2	1	0	3	2	0	2	0	1	2	1	0	1	1	0	3	0	2	0	0	1	0	0	0	2	0	0	1	1	0	2	0	1	2	1	1	7.01	0	1	3	0	4	0	0	0	0	0
C5AR1__chr19	0	0	0	0	0	0	0	0	0	0	0	0	0	0	0	0	0	0	0	0	0	0	0	0	0	0	0	0	0	0	0	0	0	0	0	0	0	0	0	0	0	0	0	0	0	0	0	0	0
C5__chr9	0	0	0	0	0	0	0	0	0	0	0	0	0	0	0	0	0	0	0	0	0	0	1	0	0	0	0	2	0	0	1	0	0	0	1	0	0	0	0	0	0	0	0	1	0	0	0	0	0
C5orf15__chr5	6	4	4	4	0	1	1	2	4	0	1	8.01	2	2	6	4	0	2	2	1	0	1	0	3	2	4	4	4	2	9.01	10.01	4	4	3	6	3	15.03	5	10.01	6	5	8.01	5	1	1	1	1	0	4
C5orf22__chr5	1	0	1	1	0	1	0	1	0	0	0	0	1	2	2	0	0	3	1	1	0	0	0	0	4	0	1	0	0	6	4	2	1	2	2	1	0	1	3	1	0	0	1	0	0	0	1	0	1
C5orf24__chr5	5	4	5	2	0	4	5	3	5	0	0	7.01	4	5	8.01	5	0	3	8.01	1	0	0	7.01	3	4	2	2	7.01	3	17.03	15.03	6	7.01	2	8.01	3	15.03	4	11.01	6	4	7.01	9.01	2	0	0	6	6	7.01
C5orf27__chr5	0	0	0	0	0	0	0	0	0	0	0	0	0	0	0	0	0	0	0	0	0	0	0	0	0	0	0	0	0	0	0	0	0	0	0	0	0	0	0	0	0	0	0	0	0	0	0	0	0
C5orf28__chr5	0	0	0	0	0	0	1	0	0	0	0	2	1	0	1	0	0	0	0	0	0	0	0	1	0	1	0	0	0	4	1	1	1	2	2	2	0	0	0	3	3	2	1	0	0	0	1	0	0
C5orf30__chr5	1	2	3	4	0	2	1	0	1	0	1	1	0	2	2	2	0	3	1	0	0	1	1	0	3	1	4	2	1	6	3	6	1	1	3	1	2	1	4	0	1	5	5	3	0	0	0	2	3
C5orf34__chr5	0	0	0	0	0	1	0	1	0	0	0	0	0	0	0	0	0	0	0	0	0	0	0	0	0	0	0	0	0	0	0	0	1	0	0	1	1	1	0	0	0	0	0	1	0	0	0	1	0
C5orf42__chr5	0	1	0	0	0	1	0	0	0	0	0	0	0	1	4	4	0	0	1	0	0	0	0	0	0	0	1	2	0	1	3	0	2	0	1	1	4	0	2	6	0	2	0	0	0	0	2	0	1
C5orf44__chr5	0	0	1	1	0	2	0	1	1	0	1	0	1	1	1	1	0	0	0	0	1	0	1	0	2	0	6	3	0	6	1	2	3	2	0	2	3	0	3	1	0	0	1	1	0	0	1	0	4
C5orf45__chr5	0	0	0	0	0	0	0	0	0	0	0	0	0	0	0	0	0	0	0	0	0	0	0	0	0	0	0	0	0	0	0	0	0	0	0	0	0	0	0	0	0	0	0	0	0	0	0	0	0
C5orf46__chr5	0	0	0	0	0	0	0	0	0	0	0	0	0	0	0	0	0	1	0	0	0	0	0	0	0	0	0	0	0	0	0	0	0	0	0	0	0	0	0	0	0	0	0	0	0	0	0	0	2
C5orf4__chr5	0	0	0	0	0	0	0	0	0	0	0	0	0	0	0	0	0	0	0	0	0	0	0	0	0	0	0	0	0	0	0	0	0	0	0	0	0	0	0	0	0	0	0	0	0	0	0	0	0
C5orf51__chr5	1	2	0	0	1	0	0	0	3	0	0	2	0	0	0	2	1	4	5	0	1	0	1	0	1	0	0	1	0	3	1	4	2	0	2	1	4	2	0	0	4	2	2	1	1	0	1	0	0
C5orf54__chr5	0	0	0	0	0	1	0	0	0	0	0	0	0	0	1	0	0	2	1	1	0	0	0	1	0	0	0	0	0	0	0	0	1	1	1	0	0	0	0	0	1	1	1	2	0	0	0	0	0
C5orf55__chr5	0	0	0	0	0	0	0	0	0	0	1	0	1	0	0	0	0	0	0	3	0	0	1	0	0	1	0	0	0	1	0	0	1	0	0	0	1	0	1	0	0	0	0	0	0	0	0	0	0
C5orf56__chr5	0	0	0	0	0	0	0	0	0	0	0	0	0	0	0	1	0	0	1	0	0	0	0	0	0	0	0	0	0	0	0	0	1	0	1	0	0	0	0	0	1	0	0	1	0	0	0	0	0
C5orf63__chr5	0	0	0	0	0	0	0	0	0	0	0	1	0	0	0	0	0	0	2	0	0	0	1	0	0	0	0	0	0	0	0	0	0	0	1	2	0	0	0	1	0	0	0	1	0	0	0	1	0
C5orf64__chr5	0	0	0	0	0	0	0	0	0	0	0	0	0	0	0	0	0	0	0	0	0	0	0	0	0	0	0	0	0	0	0	0	0	0	0	0	0	0	0	0	0	0	0	1	0	0	0	0	0
C6__chr5	0	0	0	0	0	0	0	0	0	0	0	0	0	0	0	0	0	0	0	0	0	0	0	0	0	0	0	1	0	0	0	0	0	0	0	0	0	0	0	0	0	0	0	0	0	0	0	0	0
C6orf106__chr6	1	2	1	1	0	0	1	5	1	0	0	1	0	1	1	2	0	3	0	0	0	0	0	0	3	0	2	1	0	1	2	4	1	0	0	0	1	0	4	3	1	2	0	1	0	0	1	1	0
C6orf120__chr6	2	2	1	1	0	1	1	2	0	0	1	1	0	0	3	0	0	2	4	0	0	0	0	2	2	0	2	1	0	5	5	5	4	1	2	0	0	1	1	2	1	1	1	6	0	1	1	2	2
C6orf123__chr6	0	0	0	0	0	0	0	0	0	0	0	0	0	0	0	0	0	0	0	0	0	0	0	0	0	0	0	0	0	0	0	0	0	0	0	0	0	0	0	0	0	0	0	0	0	0	0	0	0
C6orf132__chr6	0	0	0	0	0	1	0	0	1	0	1	0	0	1	0	0	0	0	0	0	0	0	0	0	0	0	0	0	0	1	0	3	0	0	0	0	1	0	0	0	0	0	0	0	0	0	0	0	0
C6orf136__chr6	1	1	0	0	0	1	1	1	1	0	0	0	3	2	3	0	0	0	1	0	1	0	0	0	3	0	1	3	1	5	4	4	2	0	1	0	0	3	3	1	0	3	1	1	0	0	1	1	2
C6orf141__chr6	0	0	0	0	0	0	0	0	0	0	0	0	0	0	0	0	0	0	0	0	0	0	0	0	0	0	0	0	0	0	1	0	0	0	2	0	0	1	0	0	0	0	0	0	0	0	0	0	0
C6orf147__chr6	0	0	0	0	0	0	1	0	0	0	0	0	0	1	0	0	0	0	0	0	0	0	0	0	0	0	0	0	0	1	0	0	0	0	0	0	1	0	0	0	0	1	0	1	0	0	1	0	0
C6orf163__chr6	0	0	0	0	0	0	0	0	0	0	0	0	0	0	0	0	0	0	0	0	0	0	0	0	0	0	0	0	0	0	0	0	0	0	0	0	0	0	0	1	0	0	0	0	0	0	0	0	0
C6orf164__chr6	0	0	0	0	0	0	0	0	0	0	0	0	0	0	0	0	0	0	0	0	0	0	0	0	0	0	0	0	0	0	0	0	0	0	0	0	0	0	0	0	0	0	0	0	0	0	0	0	0
C6orf165__chr6	0	0	0	0	0	0	0	0	0	0	0	1	0	0	0	0	0	0	0	0	0	0	0	0	0	0	0	0	0	0	0	0	0	0	0	0	0	0	0	0	0	0	0	0	0	0	0	0	0
C6orf170__chr6	0	0	0	0	0	0	0	0	0	0	0	0	0	0	0	0	0	0	0	0	0	0	0	0	0	1	0	0	0	0	0	0	0	0	0	0	1	0	0	0	0	0	0	0	0	0	0	0	1
C6orf1__chr6	2	0	2	0	0	2	3	2	0	0	0	0	0	0	1	3	0	0	0	1	0	0	1	0	1	0	2	1	0	2	2	1	1	0	0	2	4	2	3	1	0	0	1	5	0	0	1	0	2
C6orf203__chr6	0	0	2	0	0	1	0	1	0	0	2	0	0	1	0	0	0	1	2	0	0	0	2	1	0	2	2	0	1	2	2	2	2	0	2	0	1	2	0	0	0	2	0	3	0	0	0	2	2
C6orf211__chr6	0	3	1	0	0	0	1	1	1	0	1	0	0	0	1	0	0	0	0	0	0	0	0	0	2	0	1	0	1	6	3	3	1	0	2	2	0	0	2	1	0	0	3	0	0	0	3	0	1
C6orf226__chr6	0	0	0	0	0	0	0	0	0	0	0	0	0	0	1	0	0	1	1	0	0	0	0	0	0	0	0	0	0	0	1	0	0	0	0	0	0	1	0	0	0	0	1	0	0	0	0	0	0
C6orf25__chr6	0	0	0	0	0	0	0	0	0	0	0	0	0	0	0	0	0	0	0	0	0	0	1	0	0	0	0	0	0	0	0	0	0	0	0	0	0	0	0	0	0	0	0	0	0	0	0	0	0
C6orf47__chr6	0	0	0	0	0	2	1	0	1	0	0	1	0	0	0	3	0	0	1	0	0	0	0	0	1	0	1	0	0	0	0	1	1	0	1	1	0	1	0	2	0	1	0	1	0	0	0	1	1
C6orf48__chr6	6	8.01	9.01	4	1	4	9.01	3	2	0	6	10.01	6	4	9.01	9.01	0	3	4	5	0	0	1	0	5	3	13.02	7.01	1	15.03	16.03	18.04	14.02	5	6	6	9.01	6	12.02	6	9.01	9.01	11.01	11.01	0	1	1	3	9.01
C6orf52__chr6	0	0	0	0	0	0	0	0	0	0	0	0	0	0	1	0	0	0	0	0	0	0	0	0	0	0	0	0	0	0	0	0	0	0	0	0	0	0	0	0	0	0	0	0	0	0	0	0	0
C6orf57__chr6	0	0	0	0	0	0	0	0	0	0	0	0	0	0	0	0	0	0	0	0	0	0	0	0	0	0	0	0	0	0	1	1	0	1	0	0	0	0	0	0	0	0	0	0	0	0	0	0	0
C6orf58__chr6	0	0	0	0	0	0	0	0	0	0	0	0	0	0	0	0	0	0	0	0	0	0	0	0	0	0	0	0	0	0	0	0	0	0	0	0	0	0	0	0	0	0	0	0	0	0	0	0	0
C6orf62__chr6	4	9.01	18.04	8.01	0	11.01	5	9.01	4	1	11.01	40.19	8.01	13.02	16.03	6	0	6	9.01	2	2	1	10.01	4	16.03	16.03	6	9.01	9.01	38.17	9.01	11.01	9.01	6	22.06	5	14.02	10.01	19.04	14.02	15.03	6	6	24.07	0	1	11.01	11.01	14.02
C6orf70__chr6	1	1	1	0	0	0	0	1	0	0	1	1	0	0	0	0	0	0	0	2	0	1	1	0	1	0	0	0	0	1	0	0	0	0	1	0	3	0	0	0	0	0	0	2	0	0	0	0	1
C6orf7__chr6	0	0	0	0	0	0	0	0	0	0	0	0	0	0	0	0	0	0	0	0	0	0	0	0	0	0	0	0	0	0	0	0	0	0	0	0	0	0	0	0	0	0	0	0	0	0	0	0	0
C6orf89__chr6	4	0	2	3	0	1	3	1	1	0	1	5	0	1	1	4	0	2	1	0	0	0	3	0	5	1	0	0	3	4	5	4	2	0	4	1	2	1	3	6	0	1	2	4	0	0	0	2	1
C6orf99__chr6	0	0	0	0	0	0	0	0	0	0	2	0	0	0	0	0	0	0	0	0	0	0	0	0	0	0	0	0	1	0	2	0	0	1	0	1	0	0	0	0	0	0	0	0	0	0	0	0	0
C7__chr5	0	0	0	0	0	0	0	0	0	0	0	0	0	0	0	0	0	0	0	0	0	0	0	0	0	0	0	0	0	0	0	0	0	0	0	0	0	0	0	0	0	0	0	0	0	0	0	0	0
C7orf10__chr7	0	0	0	0	0	0	0	0	0	0	0	1	0	0	0	3	0	0	0	0	0	0	0	0	0	0	0	0	0	0	0	0	0	0	0	1	0	0	0	0	0	0	0	1	0	0	0	0	4
C7orf13__chr7	0	0	0	0	0	0	1	0	0	0	0	0	0	0	0	0	0	0	0	0	0	0	0	1	1	0	0	0	0	0	0	0	0	0	0	0	0	0	1	5	0	0	0	1	0	0	0	0	1
C7orf25__chr7	0	0	0	0	0	0	1	0	1	0	0	0	0	1	0	0	0	0	0	0	0	0	0	0	0	0	0	1	0	2	1	0	2	1	0	0	0	1	1	2	0	0	1	0	0	0	0	0	0
C7orf26__chr7	0	0	0	0	0	1	0	1	0	0	0	1	0	1	0	2	0	0	0	0	0	0	0	0	0	0	0	0	0	1	0	0	0	0	0	1	0	0	2	0	0	1	0	0	0	0	0	0	1
C7orf29__chr7	0	0	0	0	0	0	0	0	0	0	0	0	0	0	0	0	0	0	0	0	0	0	0	0	0	0	0	0	0	0	0	0	0	0	0	0	0	0	0	0	0	0	0	0	0	0	0	0	0
C7orf31__chr7	0	0	0	0	0	0	0	0	0	0	0	0	0	0	0	0	0	0	0	0	0	0	0	0	0	0	0	0	0	0	0	0	0	0	0	0	0	0	0	0	0	0	0	0	0	0	0	0	0
C7orf41__chr7	0	0	0	0	0	1	2	0	0	0	1	3	0	1	0	1	0	0	0	0	0	0	0	0	1	2	0	0	0	3	1	0	1	0	2	0	2	1	0	0	0	0	2	0	0	0	0	0	1
C7orf43__chr7	1	0	1	0	0	0	0	0	0	0	0	0	0	0	0	0	0	0	0	0	0	0	1	0	0	0	0	0	0	0	1	1	0	0	0	0	0	0	0	0	1	0	1	0	0	0	0	1	0
C7orf49__chr7	0	0	0	1	0	0	1	0	1	0	0	0	0	0	1	0	0	1	0	0	0	0	1	0	0	1	0	2	1	0	1	2	2	0	0	0	0	0	0	2	2	1	0	1	0	0	0	0	1
C7orf50__chr7	2	2	1	0	0	4	2	2	1	0	0	4	1	2	6	3	0	3	6	4	0	0	3	0	1	2	4	2	3	3	5	12.02	7.01	0	5	0	3	0	5	8.01	1	5	6	4	0	0	6	4	3
C7orf53__chr7	0	0	0	0	0	0	0	0	0	0	0	0	0	0	0	0	0	0	0	0	0	0	0	0	0	0	0	0	0	0	0	0	0	0	1	0	0	0	1	0	0	0	0	0	0	0	0	0	0
C7orf55-LUC7L2__chr7	0	0	0	0	0	0	0	0	0	0	0	0	0	0	1	0	0	0	0	0	0	0	0	0	0	0	0	0	0	0	0	0	0	0	0	0	0	0	0	0	0	0	0	0	0	0	0	0	0
C7orf55__chr7	0	0	0	0	0	0	0	0	1	0	1	1	0	0	0	0	0	0	0	0	0	0	0	0	1	1	1	0	0	1	0	0	0	0	0	0	0	0	1	1	0	0	1	0	0	0	0	1	0
C7orf57__chr7	0	0	0	0	0	0	0	0	0	0	0	0	0	0	0	0	0	0	0	0	0	0	0	0	0	0	0	0	0	0	0	0	0	0	0	0	0	0	0	0	0	0	0	0	0	0	0	0	0
C7orf60__chr7	0	1	3	1	0	0	1	0	0	0	0	4	0	0	0	2	0	0	0	0	0	0	1	0	1	0	0	1	0	2	3	2	0	0	3	0	1	0	2	0	1	1	0	1	0	0	1	1	3
C7orf61__chr7	0	0	1	1	0	0	0	0	0	0	0	0	0	0	0	0	0	0	0	0	0	0	0	0	0	0	0	0	0	0	0	1	0	0	1	0	0	0	0	0	1	0	0	0	0	0	0	0	0
C7orf63__chr7	0	0	0	0	0	1	0	0	0	0	0	0	0	0	0	0	0	0	0	0	0	0	0	0	0	0	0	0	0	0	0	0	0	0	0	0	0	0	0	0	0	0	0	1	0	0	0	0	0
C7orf65__chr7	0	0	0	0	0	0	0	0	0	0	0	0	0	0	0	0	0	0	0	0	0	0	1	0	0	0	0	0	0	0	0	0	0	0	0	0	0	0	0	0	0	1	0	0	0	0	0	0	0
C7orf69__chr7	0	0	0	0	0	0	0	0	0	0	0	0	0	0	0	0	0	0	0	0	0	0	0	0	0	0	0	0	0	0	0	0	0	0	0	0	0	0	0	0	0	0	0	0	0	0	0	0	0
C7orf71__chr7	0	0	0	0	0	0	0	0	0	0	0	0	0	0	0	0	0	0	0	0	0	0	0	0	0	0	0	0	0	0	0	0	0	0	0	0	0	0	0	0	0	0	0	0	0	0	0	0	0
C7orf72__chr7	0	0	1	0	0	0	0	0	0	0	0	0	0	0	0	0	0	0	0	0	0	0	0	0	0	0	0	0	0	0	0	0	0	0	0	0	0	0	0	0	0	0	0	0	0	0	0	0	0
C7orf73__chr7	4	2	2	6	0	6	5	7.01	9.01	0	5	17.03	5	10.01	4	3	0	5	11.01	2	1	0	6	1	7.01	3	6	5	1	19.04	13.02	9.01	9.01	10.01	10.01	15.03	6	10.01	11.01	11.01	7.01	5	6	13.02	0	0	5	3	14.02
C8G__chr9	0	0	0	0	0	0	0	0	0	0	0	0	0	0	0	0	0	0	0	0	0	0	0	0	0	0	0	0	0	0	0	0	0	0	0	0	0	0	0	0	0	0	0	0	0	0	0	0	0
C8orf31__chr8	0	0	0	0	0	0	0	0	0	0	0	0	0	0	0	0	0	0	0	0	0	0	0	0	0	0	0	0	0	0	0	0	0	0	0	0	0	0	0	0	0	0	0	0	0	0	0	0	0
C8orf33__chr8	1	1	6	2	0	1	2	0	4	0	1	5	3	4	4	1	0	1	2	1	0	0	0	0	1	2	3	1	2	5	0	4	2	0	4	2	3	5	4	1	1	3	2	3	0	0	2	1	1
C8orf37__chr8	0	0	0	0	0	3	0	0	0	0	2	1	0	0	0	0	0	0	0	0	0	0	0	0	0	0	1	0	0	0	0	0	0	0	1	0	0	0	0	0	0	0	0	0	0	0	0	0	0
C8orf40__chr8	1	0	1	0	0	3	0	1	3	0	0	1	0	1	1	0	0	0	1	0	0	1	2	0	0	1	1	0	0	1	1	0	0	0	2	0	1	0	4	1	1	0	0	1	1	0	0	0	0
C8orf42__chr8	0	0	0	0	0	0	0	0	0	0	0	0	0	0	2	0	0	0	0	0	0	0	0	0	0	0	0	0	0	0	1	2	0	0	1	0	0	0	0	0	0	0	0	1	0	0	0	0	0
C8orf44__chr8	0	0	0	0	0	0	0	0	0	0	0	0	0	0	0	0	0	1	0	0	0	0	0	0	0	0	0	0	0	0	1	0	1	0	0	0	0	0	0	0	0	0	0	0	0	0	0	0	0
C8orf46__chr8	0	0	0	0	0	0	0	0	0	0	0	0	0	0	0	0	0	0	0	0	0	0	0	0	0	0	0	0	0	0	0	0	0	0	0	0	0	0	0	0	0	0	0	0	0	0	0	0	0
C8orf58__chr8	0	0	4	0	0	1	0	0	2	0	0	2	0	3	1	0	0	0	0	0	1	0	0	0	1	0	1	2	1	0	1	3	1	0	1	0	1	0	1	0	1	1	0	3	0	0	1	2	0
C8orf59__chr8	1	1	2	2	0	14.02	2	1	3	0	2	6	2	5	4	3	0	0	5	2	0	0	2	1	1	6	6	2	1	7.01	3	7.01	5	0	4	2	1	4	8.01	3	3	3	9.01	1	0	0	4	3	4
C8orf76__chr8	0	1	2	2	0	0	0	0	0	0	1	0	0	1	2	0	0	0	2	0	0	0	0	0	0	0	1	1	1	0	0	0	1	2	0	0	1	0	0	1	0	1	0	1	0	0	0	0	1
C8orf82__chr8	0	0	0	0	0	0	1	0	0	0	0	0	0	0	1	1	0	1	0	0	0	0	0	0	3	0	0	0	0	0	2	0	0	0	0	1	0	0	0	1	0	0	1	0	0	0	0	0	0
C8orf86__chr8	0	0	0	0	0	0	0	0	0	0	0	0	0	0	0	0	0	0	0	0	0	0	0	0	0	0	0	0	0	0	0	0	0	0	0	0	0	0	0	0	0	0	0	0	0	0	0	0	0
C9__chr5	0	0	0	0	0	0	0	0	0	0	0	0	0	0	0	0	0	0	0	0	0	0	0	0	0	0	0	0	0	0	0	0	0	0	0	0	0	0	0	0	0	0	0	0	0	0	0	0	0
C9orf114__chr9	0	0	1	0	0	2	1	0	0	0	0	0	2	0	0	0	0	0	0	0	0	0	0	0	0	0	1	0	0	1	3	1	0	0	2	0	0	1	1	0	1	0	0	1	0	0	3	0	1
C9orf116__chr9	0	0	0	0	0	0	0	0	0	0	0	1	0	0	1	0	0	0	0	0	0	0	1	0	0	1	0	0	0	2	1	0	0	0	0	0	0	0	0	0	0	0	0	0	0	0	0	0	0
C9orf123__chr9	3	2	0	2	0	2	2	1	2	0	3	3	0	0	9.01	3	0	2	2	0	0	0	3	1	1	0	2	6	3	8.01	3	5	4	3	3	3	1	2	3	2	4	5	4	3	0	0	1	0	7.01
C9orf139__chr9	0	0	0	0	0	0	0	0	1	0	1	0	0	0	0	0	0	0	0	0	0	0	0	1	0	0	0	0	0	0	0	0	0	0	0	0	0	0	0	0	0	0	0	1	0	0	0	0	0
C9orf142__chr9	1	1	3	0	0	0	0	0	1	0	1	1	0	0	1	1	0	3	0	1	0	0	0	0	2	1	1	0	1	1	1	4	2	0	0	1	0	0	0	0	0	1	1	4	0	0	0	2	1
C9orf152__chr9	0	0	0	0	0	0	0	0	0	0	0	0	0	0	0	0	0	0	0	0	0	0	0	0	0	0	0	0	0	0	0	0	0	0	0	0	0	0	0	0	0	0	0	0	0	0	0	0	0
C9orf153__chr9	0	0	0	0	0	0	0	0	0	0	0	0	0	0	0	0	0	0	0	0	0	0	0	0	0	0	0	0	0	0	0	0	0	0	0	0	0	0	0	0	0	0	0	0	0	0	0	0	0
C9orf156__chr9	0	0	1	0	0	0	0	0	1	0	0	1	0	0	0	1	0	2	1	0	0	0	0	0	0	1	2	0	0	2	0	0	1	1	0	0	2	0	1	3	0	1	0	1	0	0	0	0	0
C9orf163__chr9	0	0	0	0	0	0	0	0	0	0	0	0	0	0	0	0	0	0	0	0	0	0	0	0	0	0	0	0	0	0	0	0	0	0	0	0	0	0	0	0	0	0	0	0	0	0	0	0	0
C9orf169__chr9	0	0	0	0	0	0	0	0	0	0	0	0	0	0	0	0	0	0	0	0	0	0	0	0	0	0	0	0	0	0	0	0	0	0	0	0	0	0	0	0	0	0	0	1	0	0	0	0	0
C9orf16__chr9	1	2	2	0	0	0	0	0	0	0	2	1	1	1	2	0	0	1	3	3	0	0	0	0	1	1	1	1	0	4	8.01	3	2	1	3	0	3	0	4	1	1	1	2	1	0	0	1	2	1
C9orf170__chr9	0	0	0	0	0	0	0	0	0	0	0	0	0	0	0	0	0	0	0	0	0	0	0	0	0	0	0	0	0	0	0	0	0	0	0	0	0	0	0	0	0	0	0	0	0	0	0	0	0
C9orf24__chr9	0	0	0	0	0	0	0	0	0	0	0	0	0	0	0	0	0	0	0	0	0	0	0	0	0	0	0	0	0	0	0	0	0	0	0	0	0	0	0	0	0	0	0	0	0	0	0	0	0
C9orf37__chr9	1	1	0	0	0	0	2	0	1	0	0	1	0	0	0	1	0	1	0	0	0	0	0	0	1	0	2	0	0	2	2	0	1	0	1	0	0	0	1	0	1	0	3	1	0	0	0	1	0
C9orf3__chr9	0	0	1	0	0	0	0	0	0	0	0	3	0	0	0	0	0	1	1	1	0	0	1	0	0	0	0	2	0	0	0	0	0	1	1	0	1	0	0	0	0	0	0	1	0	0	1	0	0
C9orf40__chr9	1	2	1	0	0	4	1	0	2	0	1	7.01	1	1	4	1	0	2	0	1	1	0	0	0	2	0	2	2	1	6	3	2	3	3	1	0	0	0	7.01	1	1	5	4	2	0	0	4	1	1
C9orf41__chr9	0	0	0	0	0	0	0	0	0	0	0	0	0	0	0	0	0	0	0	0	0	0	0	0	0	0	0	0	0	1	0	0	1	0	0	0	0	0	0	0	0	0	0	0	0	0	0	0	0
C9orf43__chr9	0	0	0	0	0	0	0	0	0	0	0	0	0	0	0	0	0	0	0	0	0	0	0	0	0	0	0	0	0	0	0	0	0	0	1	0	0	0	0	0	0	0	0	1	0	0	0	0	0
C9orf47__chr9	0	0	0	0	0	0	0	0	0	0	0	0	0	0	0	0	0	0	0	0	0	0	0	0	0	0	0	0	0	0	0	0	0	0	0	0	0	0	0	0	0	0	0	0	0	0	0	0	0
C9orf64__chr9	0	0	0	0	0	0	0	0	0	0	0	1	0	0	0	1	0	0	1	0	0	0	0	0	0	0	0	0	1	4	0	2	1	0	0	0	1	0	0	1	1	0	0	1	0	0	0	0	0
C9orf66__chr9	0	0	0	0	0	0	0	0	0	0	0	0	0	0	0	0	0	0	0	0	0	0	0	0	0	0	0	0	0	0	0	0	0	0	0	0	0	0	0	0	0	0	0	0	0	0	0	0	0
C9orf69__chr9	0	1	0	0	0	0	0	1	1	0	1	1	0	0	1	1	0	1	1	1	0	1	0	1	3	1	0	2	1	2	3	2	3	0	6	0	0	2	1	1	1	4	1	4	0	0	0	1	1
C9orf72__chr9	0	0	0	0	0	0	0	0	0	0	0	1	0	0	3	0	0	0	0	0	0	0	0	0	0	0	0	1	0	1	0	0	0	0	0	0	0	1	0	0	0	0	0	0	0	0	1	0	0
C9orf78__chr9	4	4	4	3	0	0	2	2	3	0	1	3	2	2	2	3	0	3	2	2	0	1	1	1	4	3	3	1	2	3	4	6	4	2	4	0	4	2	8.01	3	4	4	2	10.01	0	0	3	3	4
C9orf85__chr9	0	0	2	2	0	0	0	0	1	0	0	2	0	0	1	0	0	0	0	0	1	0	0	0	1	0	0	1	0	2	1	0	0	1	2	1	0	0	0	1	1	0	1	0	0	0	0	0	0
C9orf89__chr9	0	4	1	0	0	1	0	1	0	0	1	4	1	1	1	0	0	0	2	3	0	0	0	0	2	3	2	3	1	5	5	3	2	1	3	2	2	1	1	4	0	5	0	5	0	0	1	3	4
C9orf91__chr9	0	1	0	0	0	0	1	0	0	0	0	0	0	0	0	0	0	3	0	1	0	0	1	0	1	4	0	0	0	2	0	2	1	0	1	0	0	0	1	1	0	1	2	0	0	0	0	0	1
C9orf96__chr9	0	0	0	0	0	0	0	0	0	0	0	0	0	0	0	0	0	0	0	0	0	0	0	0	0	0	0	0	0	0	0	0	0	0	0	0	0	0	0	0	0	0	0	0	0	0	0	0	0
C9orf9__chr9	0	0	0	0	0	0	0	0	0	0	0	0	0	1	0	0	0	0	0	0	0	0	0	0	0	0	1	0	0	0	1	0	1	0	0	0	1	1	0	0	2	0	0	0	0	0	0	0	0
CA11__chr19	1	0	0	0	0	0	0	0	0	0	0	0	0	0	0	1	0	0	0	0	0	0	0	0	1	0	1	0	0	0	0	0	0	0	1	1	0	0	0	0	0	2	0	1	0	0	0	0	0
CA12__chr15	0	0	0	0	0	0	0	0	0	0	0	0	0	0	0	0	0	0	0	0	0	0	0	0	0	0	0	0	0	0	0	0	0	0	0	0	0	0	0	0	0	0	0	0	0	0	0	0	0
CA13__chr8	1	0	0	0	0	0	0	0	0	0	0	0	0	0	1	0	0	0	0	0	0	0	0	0	0	0	0	0	0	0	0	0	0	1	0	1	1	0	0	0	0	0	0	0	0	0	0	0	0
CA5BP1__chrX	0	0	0	0	0	0	1	0	0	0	0	0	0	0	0	0	0	0	0	0	0	0	0	0	0	1	0	0	0	0	0	0	0	0	0	0	0	0	0	0	0	0	0	0	0	0	0	0	0
CA5B__chrX	0	0	0	0	0	0	0	0	0	0	1	0	0	0	0	0	0	0	0	0	0	0	2	1	1	0	1	1	0	0	0	0	0	0	0	0	0	0	1	0	0	0	0	0	0	1	0	1	0
CA9__chr9	0	0	0	0	0	0	0	0	0	0	0	0	0	0	0	0	0	0	0	0	0	0	0	0	0	0	0	0	0	0	0	0	0	0	0	0	0	0	0	0	0	0	0	0	0	0	0	0	0
CAAP1__chr9	1	0	0	0	0	0	1	0	0	0	0	5	2	0	1	2	0	0	0	0	0	0	0	0	0	2	1	0	0	7.01	2	2	0	1	2	2	1	0	2	2	3	3	0	1	0	0	0	1	2
CAB39L__chr13	0	0	0	0	0	1	0	1	0	0	0	0	0	0	1	0	0	0	0	0	0	0	0	0	0	1	0	0	1	0	0	0	1	0	2	0	0	0	1	0	0	0	0	0	0	1	1	0	0
CAB39__chr2	2	1	1	1	0	3	2	1	6	0	5	5	0	1	4	8.01	0	0	2	1	2	0	4	0	1	4	2	1	0	5	12.02	2	2	0	7.01	5	6	0	2	2	3	1	2	6	0	0	4	2	1
CABIN1__chr22	0	1	0	1	0	3	1	0	1	0	0	0	0	1	2	0	0	0	0	0	0	0	0	0	2	1	0	0	0	1	2	1	4	0	1	0	2	0	3	1	0	1	4	1	0	0	0	1	0
CABLES1__chr18	0	0	0	0	0	0	0	0	1	0	1	1	0	0	1	1	0	0	1	0	0	0	0	0	1	0	1	0	0	3	0	0	0	0	1	0	1	0	0	0	0	0	0	1	0	0	0	0	0
CABLES2__chr20	0	1	1	0	0	0	0	1	1	0	0	3	1	2	4	0	0	1	0	1	0	0	0	1	0	0	0	0	0	1	1	0	2	0	0	0	0	2	0	5	1	1	0	0	0	0	1	0	0
CABP4__chr11	0	0	0	0	0	0	0	0	0	0	0	0	0	0	0	0	0	0	0	0	0	0	0	0	0	0	0	0	0	0	0	0	0	0	0	0	0	0	0	0	0	0	0	0	0	0	0	0	0
CABP5__chr19	0	0	0	0	0	0	0	0	0	0	0	0	0	0	0	0	0	0	0	0	0	0	0	0	0	0	0	0	0	0	0	0	0	0	0	0	0	0	0	0	0	0	0	0	0	0	0	0	0
CABYR__chr18	0	0	0	1	0	0	0	0	0	0	0	1	0	0	1	0	0	0	0	0	0	0	0	0	0	0	0	0	0	0	0	0	0	0	0	0	0	0	0	0	0	0	0	0	0	0	0	0	0
CACFD1__chr9	0	0	0	0	0	0	0	0	0	0	0	0	0	0	0	0	0	0	0	0	0	0	0	0	0	0	0	0	0	0	0	0	0	0	0	0	0	0	0	0	0	0	0	0	0	0	0	0	0
CACHD1__chr1	1	0	2	0	0	0	2	0	0	0	0	0	0	0	0	0	0	0	0	0	0	0	0	0	0	0	0	1	1	0	0	0	0	0	0	0	0	0	0	0	0	0	0	0	0	0	1	0	0
CACNA1A__chr19	0	0	0	0	0	0	0	0	0	0	0	0	0	0	0	0	0	0	0	0	0	0	0	0	0	0	0	0	0	0	0	0	0	0	0	0	0	0	0	0	0	0	0	0	0	0	0	0	0
CACNA1C__chr12	0	0	0	0	0	0	0	0	0	0	0	0	0	0	0	0	0	0	0	0	0	0	0	0	0	0	0	0	0	0	0	0	0	0	0	0	0	0	0	0	0	0	0	0	0	0	0	0	0
CACNA1E__chr1	0	0	0	0	0	0	0	0	0	0	0	0	0	0	0	0	0	0	0	0	0	0	0	0	0	0	0	0	0	0	0	0	0	0	0	0	0	0	0	0	0	0	0	0	0	0	0	0	0
CACNA1G__chr17	0	0	0	0	0	0	0	0	0	0	0	0	0	0	0	0	0	0	0	0	0	0	0	0	0	0	0	0	0	0	0	0	0	0	0	0	0	0	0	0	0	0	0	0	0	0	0	0	0
CACNA2D1__chr7	0	0	0	0	0	1	0	0	1	0	0	0	2	0	1	0	0	0	0	0	0	0	0	0	1	0	0	1	1	0	1	0	1	0	1	0	0	2	2	1	0	0	0	1	0	0	0	0	0
CACNA2D3__chr3	0	0	0	0	0	0	0	0	0	0	0	0	0	0	0	0	0	0	0	0	0	0	0	0	0	0	0	0	0	0	0	0	0	0	0	0	0	0	0	0	0	0	0	0	0	0	0	0	0
CACNB1__chr17	0	2	0	0	0	0	0	0	0	0	0	0	0	0	0	0	0	0	0	0	0	1	0	0	0	1	0	0	0	0	1	0	1	0	0	0	1	0	0	0	0	1	0	2	0	0	0	0	0
CACNB2__chr10	0	0	0	0	0	0	0	0	0	0	0	0	0	0	0	0	0	0	0	0	0	0	0	0	0	0	0	0	0	0	0	0	0	0	0	0	0	0	0	0	0	0	0	0	0	0	0	0	0
CACNB3__chr12	0	1	2	0	0	3	0	0	1	0	0	3	0	1	1	1	0	0	2	0	0	0	0	1	3	1	2	0	0	1	3	3	3	0	2	0	0	0	1	2	0	4	1	2	0	0	0	1	3
CACNB4__chr2	0	0	0	0	0	0	0	0	0	0	0	1	0	0	0	0	0	0	0	0	0	0	0	0	0	0	0	0	0	0	0	0	0	0	0	0	0	0	0	0	0	0	0	0	0	1	0	0	1
CACNG2__chr22	0	0	0	0	0	0	0	0	0	0	0	0	0	0	0	0	0	0	0	0	0	0	0	0	0	0	0	0	0	0	0	0	0	0	0	0	0	0	0	0	0	0	0	0	0	0	0	0	0
CACNG4__chr17	0	0	0	0	0	0	0	0	0	0	0	0	0	0	0	0	0	1	0	0	0	0	0	0	0	0	0	0	0	0	0	0	0	0	0	0	0	0	0	0	0	0	0	0	0	0	0	0	0
CACNG6__chr19	0	0	0	0	0	0	0	0	0	0	0	0	0	0	0	0	0	0	0	0	0	0	0	0	0	0	0	0	0	0	0	0	0	0	0	0	0	0	1	0	0	0	0	0	0	0	0	0	0
CACNG7__chr19	0	0	0	0	0	0	0	0	0	0	0	0	0	0	0	0	0	0	0	0	0	0	0	0	0	0	0	0	0	0	0	0	0	0	0	0	0	0	0	0	0	0	0	0	0	0	0	0	0
CACNG8__chr19	0	0	0	0	0	0	0	0	2	0	2	3	0	0	0	0	0	0	0	0	0	0	0	0	0	0	0	1	0	0	0	0	6	0	0	1	0	0	5	0	0	2	0	0	0	0	0	0	1
CACTIN-AS1__chr19	0	0	0	0	0	0	0	0	0	0	0	0	0	0	0	0	0	0	0	0	0	0	0	0	0	0	0	0	0	0	0	0	0	0	0	0	0	0	0	0	0	0	0	0	0	0	0	0	0
CACTIN__chr19	0	0	1	1	0	0	3	0	1	0	0	3	0	2	0	3	0	3	2	1	1	1	1	1	0	1	1	0	1	1	2	1	2	0	1	1	2	1	3	2	1	0	1	1	0	0	1	0	0
CACUL1__chr10	4	2	4	3	0	0	1	1	7.01	1	5	2	8.01	2	4	4	0	3	5	2	2	1	3	3	2	3	3	6	2	8.01	13.02	6	9.01	2	10.01	6	4	4	6	6	5	4	8.01	7.01	0	0	5	3	1
CACYBP__chr1	7.01	9.01	13.02	5	1	22.06	14.02	0	16.03	0	11.01	9.01	11.01	10.01	12.02	17.03	0	8.01	3	5	6	2	7.01	5	12.02	1	8.01	7.01	8.01	30.11	19.04	15.03	10.01	7.01	16.03	10.01	10.01	5	26.08	11.01	8.01	7.01	18.04	25.07	1	0	9.01	15.03	11.01
CADM1__chr11	1	3	7.01	2	0	4	1	5	3	1	2	9.01	6	1	7.01	0	0	4	5	1	1	2	4	2	3	2	3	8.01	2	10.01	5	1	4	2	7.01	5	8.01	3	8.01	10.01	12.02	7.01	3	10.01	0	0	6	2	3
CADM2-AS2__chr3	0	0	0	0	0	0	0	0	0	0	0	0	0	0	0	0	0	0	0	0	0	0	0	0	0	0	0	0	0	0	0	0	0	0	0	0	0	0	0	0	0	0	0	0	0	0	0	0	0
CADM2__chr3	0	0	0	0	0	0	0	0	0	0	0	0	0	0	0	0	0	0	0	0	0	0	0	0	0	0	0	0	0	0	0	0	0	0	0	0	0	0	0	0	0	0	0	0	0	0	0	0	0
CADM4__chr19	0	0	0	0	0	1	0	0	0	0	0	0	1	0	0	1	0	0	1	0	0	0	0	0	2	0	0	0	0	0	1	0	0	0	0	0	0	0	0	0	0	0	0	0	0	0	0	1	0
CADPS2__chr7	0	0	0	0	0	0	0	1	0	0	0	1	0	0	1	1	0	0	0	0	0	0	2	1	0	0	0	0	0	2	0	0	0	0	0	0	3	0	3	1	2	1	0	1	0	0	0	0	2
CAD__chr2	1	2	1	1	0	0	5	1	3	0	0	6	1	1	4	0	0	1	0	0	1	0	3	1	2	4	3	2	1	1	5	6	9.01	1	4	2	1	3	8.01	3	2	4	2	7.01	0	0	1	1	1
CAGE1__chr6	0	0	0	0	0	0	0	0	0	0	0	0	0	0	0	0	0	0	0	0	0	0	0	0	0	0	0	0	0	0	0	0	0	0	0	0	0	0	0	0	0	0	0	0	0	0	0	0	0
CAHM__chr6	0	0	0	0	0	0	0	0	0	0	0	0	0	0	0	0	0	0	0	0	0	0	0	0	0	0	0	0	0	0	0	0	0	0	0	0	0	0	0	0	1	0	0	0	0	0	0	0	0
CALB2__chr16	0	0	0	1	0	0	0	0	0	0	0	0	0	0	0	0	0	0	0	0	0	0	0	0	0	0	0	0	0	0	0	0	0	0	0	0	0	0	0	0	0	0	0	0	0	0	0	0	0
CALCOCO1__chr12	0	2	0	0	0	1	0	0	0	0	2	1	1	0	2	3	0	1	0	0	0	0	0	0	0	0	1	0	0	1	0	0	3	1	0	2	0	0	2	2	0	2	3	0	0	0	0	0	2
CALCOCO2__chr17	0	3	2	3	0	2	7.01	7.01	0	0	0	6	0	0	2	1	0	0	2	0	0	0	1	1	2	0	0	3	0	4	7.01	2	5	2	1	1	1	0	5	4	3	4	1	3	0	0	4	7.01	2
CALCRL__chr2	0	0	0	0	0	0	0	0	0	0	0	0	0	0	0	0	0	0	0	0	0	0	0	0	0	0	0	0	0	0	0	0	0	0	0	0	0	0	0	0	0	0	0	0	0	0	0	0	0
CALD1__chr7	5	9.01	13.02	17.03	0	11.01	17.03	10.01	25.07	0	18.04	53.34	7.01	13.02	20.05	16.03	0	12.02	15.03	4	1	0	16.03	13.02	17.03	13.02	22.06	22.06	11.01	36.15	21.05	17.03	20.05	9.01	17.03	15.03	36.15	12.02	41.2	36.15	13.02	35.15	11.01	19.04	0	0	16.03	16.03	36.15
CALHM1__chr10	1	0	0	0	0	0	0	0	0	0	0	0	0	0	0	1	0	0	0	0	0	0	0	1	0	0	0	0	0	0	1	0	0	0	0	0	0	0	0	0	0	0	0	1	0	0	0	1	0
CALHM2__chr10	0	0	0	0	0	0	0	0	0	0	1	1	0	0	0	0	0	1	1	0	1	0	1	0	2	0	1	0	0	0	0	0	1	0	0	0	0	2	0	1	0	1	0	0	0	0	0	0	1
CALM1__chr14	12.02	13.02	29.1	15.03	0	37.16	18.04	16.03	26.08	1	18.04	47.27	24.07	17.03	32.12	26.08	1	27.09	25.07	14.02	10.01	5	18.04	4	29.1	14.02	29.1	36.15	22.06	71.61	39.18	35.15	51.31	18.04	46.25	31.11	33.13	21.05	42.21	45.24	34.14	37.16	38.17	45.24	2	1	13.02	28.09	30.11
CALM2__chr2	36.15	40.19	72.63	44.23	1	46.25	32.12	21.05	38.17	0	48.28	121.78	33.13	34.14	52.33	48.28	0	23.06	22.06	28.09	15.03	5	34.14	30.11	54.35	19.04	35.15	56.38	23.06	109.44	79.76	114.57	74.67	32.12	73.65	76.7	74.67	46.25	118.69	75.69	53.34	84.86	57.39	69.58	3	2	51.31	37.16	126.93
CALM3__chr19	4	9.01	6	2	0	11.01	12.02	7.01	16.03	0	8.01	10.01	8.01	6	15.03	20.05	0	11.01	18.04	4	2	2	6	3	2	4	17.03	10.01	9.01	16.03	24.07	23.06	21.05	5	15.03	11.01	17.03	10.01	24.07	35.15	2	22.06	12.02	27.09	0	0	6	10.01	10.01
CALML4__chr15	0	0	0	0	0	1	0	0	0	0	0	0	0	0	1	1	0	0	0	0	0	0	0	0	0	0	1	1	1	1	0	0	0	0	1	2	0	0	0	0	0	1	0	1	1	0	1	0	0
CALN1__chr7	0	0	0	0	0	0	0	0	1	0	0	0	0	0	0	0	0	0	0	0	0	0	0	0	0	0	1	0	0	0	0	0	0	0	0	0	0	0	1	0	0	0	0	0	0	0	0	0	0
CALR__chr19	12.02	7.01	10.01	5	0	20.05	14.02	6	15.03	0	19.04	28.09	14.02	18.04	31.11	24.07	0	12.02	21.05	5	2	3	19.04	6	21.05	20.05	32.12	17.03	15.03	57.39	25.07	36.15	25.07	4	20.05	15.03	21.05	12.02	30.11	25.07	11.01	28.09	34.14	34.14	1	1	10.01	13.02	29.1
CALU__chr7	11.01	23.06	32.12	8.01	1	27.09	21.05	19.04	28.09	0	17.03	57.39	12.02	13.02	33.13	21.05	0	32.12	13.02	12.02	4	3	22.06	3	35.15	25.07	31.11	26.08	19.04	62.47	45.24	45.24	35.15	11.01	33.13	29.1	33.13	20.05	48.28	33.13	20.05	35.15	26.08	20.05	0	1	26.08	18.04	33.13
CAMK1D__chr10	0	0	1	0	0	0	2	0	0	0	0	1	0	0	1	1	0	0	0	0	0	0	0	0	0	0	0	0	1	0	1	0	0	0	0	0	0	1	1	0	0	1	0	0	0	0	0	0	0
CAMK1G__chr1	0	0	0	0	0	0	0	0	0	0	0	0	0	0	0	0	0	0	0	0	0	0	0	0	0	0	0	0	0	0	0	0	0	0	0	0	1	0	0	0	0	0	0	0	0	0	0	0	0
CAMK1__chr3	0	2	1	0	0	1	1	0	4	0	0	3	1	2	2	0	0	0	0	1	0	0	1	0	1	0	1	1	0	4	4	0	3	0	1	0	0	2	3	2	0	0	0	1	0	0	0	0	1
CAMK2B__chr7	0	0	0	0	0	0	0	0	0	0	0	0	0	0	1	0	0	0	0	0	0	0	0	0	0	0	0	0	0	0	0	2	0	0	0	0	0	0	0	0	0	0	0	1	0	0	0	0	0
CAMK2D__chr4	0	0	1	1	0	4	2	2	4	0	1	4	1	0	3	0	0	0	1	4	1	1	1	1	0	3	3	0	1	7.01	5	1	1	0	6	2	2	1	1	1	2	7.01	2	8.01	0	0	2	0	2
CAMK2G__chr10	0	1	2	1	0	2	0	2	4	0	4	2	2	2	3	1	0	3	0	0	0	0	1	1	2	0	3	1	1	6	3	7.01	1	1	9.01	2	1	3	8.01	5	1	2	2	2	0	1	1	2	1
CAMK2N1__chr1	0	1	0	1	0	7.01	2	3	2	0	1	2	0	1	6	0	0	3	0	1	1	0	1	1	2	1	2	1	0	3	7.01	5	1	1	4	1	1	1	8.01	1	5	4	1	10.01	0	0	1	1	2
CAMK2N2__chr3	0	0	1	0	0	0	0	0	2	0	1	0	0	0	1	0	0	0	1	0	0	0	1	0	0	1	0	0	0	2	2	1	1	0	0	0	0	1	0	1	0	0	0	1	0	0	1	0	0
CAMK4__chr5	0	0	0	0	0	1	0	0	1	0	0	2	0	0	0	0	0	0	0	0	0	0	0	0	0	0	0	0	0	0	0	0	0	0	0	0	0	0	0	0	0	0	0	0	0	0	0	0	0
CAMKK1__chr17	0	0	0	0	0	0	0	0	0	0	1	0	0	0	1	0	0	0	0	0	0	0	0	0	0	0	1	0	0	0	1	0	0	0	0	0	0	0	1	0	0	0	0	0	0	0	0	0	0
CAMKK2__chr12	1	2	1	1	0	2	1	2	0	0	0	1	1	1	3	3	0	2	1	3	0	1	2	1	2	1	4	1	1	3	2	1	0	0	8.01	2	2	0	0	0	4	0	1	3	0	0	1	1	1
CAMKMT__chr2	0	1	0	0	0	0	0	0	1	0	0	1	0	0	1	0	0	0	0	0	0	0	1	0	0	0	0	0	0	0	1	1	1	0	0	0	0	0	0	0	0	0	0	1	0	0	0	0	1
CAMLG__chr5	1	0	1	1	0	1	1	0	1	0	2	4	0	3	2	4	0	1	3	3	0	0	1	0	0	0	0	1	2	6	4	2	1	2	6	2	2	0	1	1	4	4	0	5	0	0	1	2	2
CAMSAP1__chr9	0	2	1	1	0	2	1	0	0	0	2	4	0	0	3	1	0	2	3	0	0	0	1	1	1	0	2	0	0	6	3	1	2	0	0	0	1	1	1	2	0	1	2	4	0	0	1	0	2
CAMSAP2__chr1	1	1	2	5	0	6	2	1	1	0	1	9.01	2	4	4	1	0	2	3	0	0	0	7.01	2	3	3	7.01	1	1	10.01	9.01	6	2	0	4	4	8.01	0	2	2	2	4	1	2	0	0	1	3	2
CAMSAP3__chr19	0	0	0	0	0	0	0	0	0	0	0	0	0	0	0	0	0	0	0	0	0	0	0	0	0	0	0	0	1	0	0	1	0	0	0	0	0	0	0	0	0	0	0	0	0	0	0	0	0
CAMTA1__chr1	2	1	2	1	0	2	1	0	4	0	4	8.01	2	1	1	4	0	3	4	2	2	0	1	1	2	2	10.01	3	5	9.01	3	7.01	2	2	8.01	6	2	3	7.01	3	2	4	3	7.01	0	0	2	3	5
CAMTA2__chr17	0	0	0	0	0	0	1	1	1	0	2	1	0	3	4	2	0	1	3	1	0	0	0	0	2	1	4	0	3	0	3	9.01	4	0	2	0	3	0	4	2	0	2	2	7.01	0	0	5	2	0
CAND1__chr12	3	3	3	5	0	7.01	13.02	1	11.01	0	7.01	28.09	2	10.01	16.03	3	0	13.02	6	5	1	0	1	4	13.02	7.01	15.03	15.03	5	32.12	10.01	7.01	9.01	3	9.01	8.01	10.01	9.01	14.02	7.01	7.01	6	7.01	13.02	0	0	5	4	14.02
CAND2__chr3	0	0	0	0	0	0	0	0	0	0	0	0	0	0	1	0	0	0	0	0	0	0	0	0	1	0	0	0	0	1	0	0	0	0	1	0	0	1	0	0	0	0	0	1	0	0	0	0	1
CANT1__chr17	3	2	2	1	0	8.01	2	1	4	0	3	4	6	2	3	7.01	0	6	1	0	0	0	2	2	0	1	2	0	2	8.01	6	7.01	6	2	4	0	6	3	5	5	1	3	5	6	0	0	0	1	2
CANX__chr5	19.04	22.06	23.06	16.03	0	20.05	23.06	10.01	31.11	0	22.06	68.56	18.04	38.17	51.31	23.06	1	25.07	22.06	17.03	6	1	21.05	15.03	23.06	23.06	40.19	46.25	31.11	72.63	44.23	37.16	46.25	15.03	36.15	16.03	45.24	18.04	58.41	45.24	37.16	48.28	36.15	58.41	1	1	28.09	16.03	34.14
CAP1__chr1	10.01	21.05	32.12	15.03	0	38.17	25.07	6	23.06	2	28.09	59.42	16.03	41.2	44.23	33.13	1	38.17	22.06	11.01	7.01	2	15.03	7.01	29.1	20.05	35.15	36.15	20.05	67.55	51.31	39.18	50.3	19.04	27.09	34.14	42.21	19.04	62.47	42.21	33.13	29.1	36.15	23.06	3	0	17.03	23.06	35.15
CAP2__chr6	1	2	1	1	0	5	1	3	3	0	2	8.01	4	4	2	6	0	1	0	1	1	1	1	1	2	2	1	2	1	4	6	5	2	1	6	2	7.01	2	10.01	9.01	0	8.01	2	5	0	0	2	0	4
CAPG__chr2	0	0	0	0	0	0	0	0	0	0	0	0	0	1	0	0	0	1	0	0	0	0	0	0	0	0	0	0	0	0	0	0	0	0	0	0	0	0	0	0	0	0	0	0	0	0	0	0	0
CAPN10__chr2	1	0	0	0	0	1	0	0	0	0	0	0	0	0	1	0	0	0	0	0	0	0	0	0	0	0	0	0	0	1	0	1	0	0	0	0	0	0	1	1	1	2	0	0	0	0	0	0	0
CAPN11__chr6	0	0	0	0	0	0	0	0	0	0	0	0	0	0	0	0	0	0	0	0	0	0	0	0	0	0	0	0	0	0	0	0	0	0	0	0	0	0	0	0	0	0	0	0	0	0	0	0	0
CAPN12__chr19	0	0	0	0	0	0	0	0	0	0	0	0	0	0	0	0	0	0	0	0	0	0	0	0	0	0	0	0	0	0	0	0	0	0	0	0	0	0	0	0	0	0	0	0	0	0	0	0	0
CAPN1__chr11	2	4	0	0	1	1	2	1	5	0	1	3	1	1	3	6	0	1	1	0	0	1	4	0	2	2	3	1	2	3	7.01	4	6	0	7.01	1	1	0	5	3	1	6	3	4	0	0	1	3	0
CAPN2__chr1	8.01	10.01	25.07	6	0	11.01	15.03	9.01	22.06	0	16.03	53.34	7.01	21.05	32.12	14.02	1	9.01	21.05	9.01	4	2	17.03	8.01	15.03	22.06	27.09	18.04	11.01	55.37	35.15	30.11	19.04	10.01	37.16	12.02	14.02	13.02	34.14	18.04	16.03	14.02	8.01	28.09	1	0	12.02	17.03	23.06
CAPN3__chr15	0	0	0	0	0	0	0	0	0	0	0	0	0	0	0	0	0	0	0	0	0	0	0	0	0	0	0	0	0	0	0	0	0	0	0	0	0	0	0	0	0	0	0	0	0	0	0	0	0
CAPN5__chr11	0	0	0	0	0	0	1	0	0	0	0	1	0	0	2	0	0	1	0	0	1	1	0	0	0	1	2	0	0	3	1	0	0	0	2	0	1	0	0	1	1	0	0	0	0	0	1	0	0
CAPN7__chr3	0	0	1	1	0	3	2	0	1	0	0	4	2	0	0	0	0	1	3	0	0	0	0	1	0	1	1	3	4	1	1	1	4	1	1	1	1	1	0	0	0	2	0	1	0	0	0	0	0
CAPN8__chr1	0	0	0	0	0	0	0	0	0	0	0	0	0	0	1	0	0	0	0	0	0	0	0	0	0	0	0	0	0	0	0	0	0	0	0	0	0	0	0	0	0	0	0	0	0	0	0	0	0
CAPNS1__chr19	18.04	29.1	26.08	8.01	0	30.11	47.27	14.02	37.16	1	17.03	42.21	34.14	22.06	50.3	30.11	2	40.19	25.07	21.05	6	3	25.07	6	39.18	31.11	26.08	12.02	31.11	51.31	70.6	73.65	44.23	10.01	85.88	13.02	36.15	40.19	80.78	86.91	19.04	62.47	29.1	63.48	0	1	10.01	34.14	36.15
CAPNS2__chr16	0	0	0	0	0	0	0	0	0	0	0	0	0	0	0	0	0	0	0	0	0	0	0	0	0	0	0	0	0	0	0	0	0	0	0	0	0	0	0	0	0	0	0	0	0	0	0	0	0
CAPRIN1__chr11	7.01	7.01	6	7.01	0	4	5	1	17.03	0	6	13.02	5	9.01	9.01	10.01	0	2	8.01	4	4	0	8.01	5	7.01	9.01	8.01	10.01	4	23.06	14.02	26.08	14.02	1	22.06	9.01	13.02	11.01	16.03	18.04	8.01	17.03	11.01	16.03	0	0	5	9.01	11.01
CAPRIN2__chr12	6	1	0	1	0	4	4	2	5	0	3	3	4	1	4	6	0	9.01	6	2	1	0	0	0	4	2	2	11.01	1	4	9.01	7.01	2	1	7.01	0	2	2	5	5	10.01	6	6	1	0	0	0	1	4
CAPS2__chr12	0	0	0	0	0	0	0	0	0	0	0	0	0	1	0	0	0	0	0	0	0	0	0	0	0	0	0	0	0	0	0	0	0	1	1	0	0	0	0	0	0	0	0	0	0	0	0	0	0
CAPSL__chr5	0	0	0	0	0	0	0	0	0	0	0	0	0	0	0	0	0	0	0	0	0	0	0	0	0	0	0	0	0	0	0	0	1	0	0	0	0	0	0	0	0	0	0	0	0	0	0	0	0
CAPS__chr19	0	0	0	0	0	0	0	0	0	0	0	0	0	0	0	0	0	0	1	0	0	0	0	0	0	0	0	0	0	0	0	0	0	0	0	0	0	0	0	1	0	0	0	0	0	0	0	0	0
CAPZA1__chr1	9.01	14.02	17.03	9.01	1	26.08	10.01	14.02	14.02	1	8.01	52.33	9.01	11.01	15.03	23.06	1	14.02	7.01	11.01	11.01	2	10.01	8.01	18.04	10.01	10.01	14.02	9.01	57.39	23.06	20.05	21.05	7.01	25.07	15.03	24.07	13.02	27.09	23.06	13.02	26.08	10.01	44.23	0	2	14.02	10.01	24.07
CAPZA2__chr7	2	4	3	4	1	1	5	3	3	0	4	15.03	2	6	13.02	3	0	4	3	6	3	2	4	7.01	12.02	4	10.01	10.01	9.01	37.16	6	7.01	3	2	2	7.01	9.01	3	12.02	8.01	2	8.01	5	5	0	1	5	3	4
CAPZB__chr1	4	10.01	6	5	0	3	15.03	3	19.04	0	9.01	26.08	9.01	9.01	18.04	12.02	1	11.01	12.02	3	3	1	6	5	9.01	4	20.05	6	9.01	16.03	17.03	29.1	26.08	3	20.05	8.01	14.02	10.01	28.09	22.06	3	19.04	10.01	19.04	0	0	2	10.01	15.03
CARD10__chr22	0	0	1	0	0	2	0	0	0	0	0	0	0	0	0	0	0	1	1	0	0	0	0	0	0	0	1	2	0	2	2	2	0	0	1	0	1	0	2	0	2	1	1	0	0	0	0	1	3
CARD6__chr5	0	0	0	0	0	0	0	0	1	0	0	0	0	0	1	0	0	0	0	0	0	0	0	0	1	0	0	0	0	0	1	0	1	0	0	0	1	0	2	0	0	0	0	0	0	0	0	0	1
CARD8__chr19	0	1	0	0	0	1	1	1	0	0	1	1	0	0	0	5	0	1	0	0	0	0	0	0	0	0	0	2	0	0	0	3	2	2	2	1	0	0	1	2	0	0	0	1	0	0	0	2	0
CARD9__chr9	0	0	0	0	0	0	0	0	0	0	0	0	0	0	0	0	0	0	0	0	0	0	0	0	0	0	0	0	0	0	0	0	0	0	0	0	0	0	0	0	0	0	0	0	0	0	0	0	0
CARHSP1__chr16	0	2	1	0	0	0	1	0	2	1	0	0	0	1	2	2	0	3	2	1	1	0	0	0	0	0	3	1	1	4	4	3	2	1	2	0	2	2	3	1	1	4	3	5	0	0	1	1	0
CARKD__chr13	1	2	0	0	0	1	2	1	1	0	1	0	1	3	3	2	0	0	2	0	1	0	1	0	0	1	1	2	2	5	3	2	2	0	1	2	0	2	3	1	2	6	2	6	0	0	2	0	2
CARM1__chr19	1	0	1	0	0	2	2	1	2	0	2	8.01	1	3	6	3	0	3	3	1	0	0	2	0	3	1	1	1	0	3	2	9.01	1	1	5	2	2	7.01	7.01	4	1	4	1	6	0	0	2	0	3
CARNS1__chr11	0	0	0	0	0	0	0	0	0	0	0	0	0	0	0	0	0	0	0	0	0	0	0	0	0	0	0	0	0	0	0	0	0	0	0	0	0	0	0	0	0	0	0	0	0	0	0	0	0
CARS2__chr13	1	0	3	0	0	0	1	0	9.01	0	2	0	1	1	5	1	0	3	0	0	0	0	1	0	1	3	0	1	2	3	3	5	2	1	3	2	3	0	11.01	10.01	1	3	3	4	0	0	2	0	3
CARS__chr11	2	1	1	2	0	3	0	0	1	0	0	0	3	0	2	1	0	4	2	1	1	0	3	0	3	2	1	2	1	2	0	2	5	1	6	1	0	3	5	1	1	1	1	2	0	0	3	0	1
CASC1__chr12	0	0	0	0	0	0	0	0	0	0	0	0	0	0	0	0	0	0	0	0	0	0	0	0	0	0	0	0	0	0	0	0	0	0	0	0	1	0	0	0	0	0	0	0	0	0	0	0	0
CASC2__chr10	0	0	0	0	0	0	0	0	0	0	0	0	0	0	0	0	0	0	0	0	0	0	0	0	0	0	0	0	0	0	0	0	0	0	0	0	0	0	0	0	0	0	0	0	0	0	0	0	0
CASC3__chr17	0	2	0	0	0	2	0	0	1	0	0	8.01	3	2	3	2	0	3	0	1	1	0	2	1	2	1	4	3	0	6	2	3	8.01	2	6	0	7.01	2	6	3	2	4	4	4	0	0	0	3	1
CASC4__chr15	1	3	2	1	0	3	4	2	0	0	1	5	0	1	6	1	0	4	1	2	0	0	1	0	2	3	1	2	2	7.01	6	3	2	2	5	2	3	3	5	4	1	8.01	1	6	0	0	4	1	2
CASC5__chr15	2	3	2	1	0	4	1	3	5	0	3	0	0	2	0	1	0	1	0	0	0	0	2	3	0	0	0	0	0	0	3	1	2	0	10.01	1	3	8.01	10.01	10.01	2	9.01	2	6	0	0	2	4	1
CASD1__chr7	0	0	1	0	0	0	2	0	0	0	0	3	2	0	2	0	0	0	0	0	0	0	0	0	1	0	1	0	0	2	1	0	2	0	3	0	0	1	0	0	0	0	0	0	0	0	0	0	1
CASKIN2__chr17	0	0	0	0	0	0	0	0	0	0	0	0	0	0	0	0	0	0	0	0	0	0	0	0	0	0	0	0	0	0	0	0	0	0	0	1	0	0	0	0	1	0	2	1	0	0	0	0	0
CASK__chrX	0	2	2	0	0	0	0	1	0	0	0	2	1	1	1	3	0	2	4	0	1	0	0	2	0	4	0	3	1	7.01	3	1	0	0	0	1	0	2	2	1	1	3	0	0	1	0	1	0	2
CASP10__chr2	0	0	0	0	0	0	0	0	0	0	0	0	0	0	0	0	0	0	0	0	0	0	1	0	0	0	0	0	0	0	0	0	0	0	0	0	2	0	0	1	0	0	0	0	0	0	0	0	0
CASP14__chr19	0	0	0	0	0	0	0	0	0	0	0	0	0	0	0	0	0	0	0	0	0	0	0	0	0	0	0	0	0	0	0	0	0	0	1	0	0	0	0	0	0	0	0	0	0	0	0	0	0
CASP1__chr11	0	0	0	0	0	0	0	1	0	0	1	1	0	0	1	0	0	0	0	0	0	0	0	0	0	2	0	0	0	1	1	0	2	0	0	2	0	0	0	0	0	0	0	1	0	0	0	0	0
CASP2__chr7	0	0	2	0	0	3	2	0	6	0	1	3	2	6	4	2	1	7.01	0	4	0	1	4	1	6	0	3	5	0	9.01	8.01	3	1	1	1	0	4	1	8.01	2	4	5	3	5	0	0	2	0	0
CASP3__chr4	1	2	2	0	0	2	1	1	1	0	2	3	0	4	1	3	1	0	3	1	2	0	2	0	1	1	5	2	0	4	3	1	2	0	4	0	2	0	4	5	1	5	3	1	0	0	2	0	0
CASP4__chr11	0	1	0	2	0	0	2	0	2	0	1	0	2	1	4	0	0	0	0	0	0	0	0	0	1	1	4	1	1	1	3	0	3	0	4	2	0	0	1	1	0	3	1	0	0	0	1	0	3
CASP6__chr4	1	2	0	0	0	3	1	0	1	0	2	2	0	1	0	2	0	0	3	0	0	0	3	0	3	0	0	2	1	4	1	8.01	4	1	2	1	0	2	6	5	4	5	1	9.01	0	0	0	2	0
CASP7__chr10	0	0	0	2	0	1	1	1	0	0	0	5	1	0	3	0	0	0	1	0	0	0	0	0	1	0	0	0	1	3	3	1	0	2	2	0	1	0	3	0	1	1	0	2	0	0	0	2	0
CASP8AP2__chr6	0	7.01	1	2	0	0	2	0	1	0	2	3	1	1	6	3	0	2	0	0	0	0	0	0	1	1	4	4	1	0	0	0	0	0	2	0	2	1	1	0	1	2	0	2	0	0	0	0	1
CASP8__chr2	0	0	2	0	0	1	0	0	0	0	0	1	0	0	1	0	0	0	0	0	0	0	0	0	0	1	0	0	0	0	0	0	0	0	0	1	1	0	0	0	0	0	0	1	0	0	0	0	1
CASP9__chr1	0	0	0	0	0	1	0	0	0	0	0	0	0	0	0	0	0	0	0	0	0	0	0	0	0	0	0	0	0	0	0	1	0	0	0	0	0	0	0	0	0	0	0	1	0	0	0	0	1
CAST__chr5	3	2	16.03	0	0	11.01	12.02	7.01	15.03	0	1	21.05	2	2	11.01	10.01	0	12.02	7.01	9.01	4	1	7.01	1	6	7.01	2	8.01	4	12.02	14.02	15.03	19.04	3	14.02	2	15.03	8.01	22.06	16.03	9.01	11.01	12.02	11.01	0	0	3	5	4
CASZ1__chr1	0	0	0	0	0	0	0	0	0	0	0	0	0	0	0	0	0	0	0	0	0	0	0	0	0	0	0	0	0	0	0	0	1	0	0	0	0	0	0	0	0	0	0	0	0	0	0	0	0
CATSPER1__chr11	0	0	0	0	0	0	0	0	0	0	0	1	0	0	0	1	0	0	0	0	0	0	0	0	0	0	0	0	0	0	1	0	0	1	0	1	0	0	0	0	0	2	0	0	0	0	0	0	0
CATSPER2P1__chr15	0	0	0	0	0	0	0	0	0	0	0	0	0	0	0	0	0	0	0	0	0	0	0	0	0	0	0	0	0	0	0	0	0	0	0	0	0	0	0	0	0	0	0	1	0	0	0	0	0
CATSPER2__chr15	0	0	1	0	0	0	0	0	1	0	0	0	0	0	0	0	0	1	0	0	0	0	0	0	0	0	0	0	0	0	1	0	0	0	0	0	0	0	2	1	0	0	1	1	0	0	0	0	0
CATSPER3__chr5	0	0	0	0	0	0	0	0	0	0	0	0	0	0	0	0	0	0	0	0	0	0	0	0	0	0	0	0	0	0	0	0	0	0	0	0	0	0	0	0	0	0	0	0	0	0	0	0	0
CATSPERB__chr14	0	0	0	0	0	0	0	0	0	0	0	0	0	0	0	0	0	0	0	0	0	0	0	0	0	0	0	0	0	0	0	0	0	0	0	0	0	0	0	0	0	0	0	0	0	0	0	0	0
CATSPERD__chr19	0	0	0	0	0	0	0	0	0	0	0	0	0	0	0	0	0	0	0	0	0	0	0	0	0	0	0	0	0	0	0	0	0	0	0	0	0	0	0	0	0	0	0	0	0	0	0	0	0
CATSPERG__chr19	0	0	0	0	0	0	0	0	0	0	0	0	0	0	0	0	0	0	1	0	0	0	0	0	0	0	0	0	0	0	0	0	0	0	0	0	0	0	0	0	0	0	0	0	0	0	0	0	0
CAT__chr11	1	2	2	1	0	3	2	1	4	0	4	7.01	1	0	1	3	0	3	5	0	1	2	1	0	3	1	2	3	1	9.01	0	1	3	1	5	1	2	4	6	2	2	0	0	4	0	0	1	2	2
CAV1__chr7	30.11	64.5	67.55	23.06	2	61.45	52.33	39.18	34.14	1	37.16	250.48	32.12	47.27	88.95	48.28	1	41.2	45.24	35.15	20.05	8.01	51.31	27.09	31.11	47.27	75.69	59.42	65.51	196.62	110.46	75.69	117.66	51.31	93.04	65.51	89.97	41.2	103.28	111.49	55.37	69.58	62.47	108.41	4	0	59.42	31.11	142.43
CAV2__chr7	1	10.01	8.01	7.01	0	9.01	10.01	5	16.03	0	10.01	45.24	7.01	10.01	14.02	10.01	0	4	2	6	6	3	10.01	5	5	5	7.01	9.01	7.01	18.04	25.07	10.01	7.01	6	17.03	16.03	12.02	2	30.11	23.06	9.01	14.02	5	12.02	2	1	8.01	8.01	31.11
CBFA2T2__chr20	1	0	0	0	0	0	3	0	0	0	2	1	0	0	1	0	0	0	0	0	0	0	0	0	1	0	1	0	0	1	2	1	3	0	1	1	0	0	1	0	0	1	0	2	0	0	0	0	1
CBFB__chr16	7.01	8.01	6	5	0	3	3	10.01	13.02	0	8.01	18.04	4	6	6	10.01	0	0	9.01	8.01	4	1	8.01	7.01	3	3	7.01	13.02	9.01	29.1	8.01	12.02	19.04	6	13.02	15.03	7.01	6	8.01	16.03	7.01	14.02	12.02	17.03	1	0	13.02	8.01	14.02
CBLB__chr3	0	1	3	0	0	0	0	0	0	0	0	0	0	2	1	0	0	0	0	0	0	0	0	0	0	3	0	1	0	2	1	0	1	0	1	0	0	2	2	1	1	0	0	0	0	0	0	0	0
CBLL1__chr7	1	3	4	1	0	5	0	3	1	0	3	1	0	0	1	1	0	1	5	0	0	0	0	0	2	0	5	2	1	3	5	3	4	0	2	0	0	3	5	8.01	1	0	2	4	0	0	1	0	1
CBLN3__chr14	0	0	0	0	0	0	0	1	0	0	0	0	0	0	0	1	0	0	0	0	0	0	0	0	0	2	0	0	0	0	1	0	0	0	0	0	1	0	1	0	0	0	0	2	0	0	0	0	0
CBL__chr11	1	4	0	1	0	2	2	3	6	0	0	2	0	1	1	3	0	1	0	0	0	0	6	3	3	3	1	1	2	3	4	1	1	0	1	4	3	4	3	3	0	5	3	2	0	0	0	0	0
CBR1__chr21	0	5	1	1	0	5	8.01	4	3	0	5	10.01	1	4	6	4	0	4	4	3	1	0	1	1	4	5	5	2	5	13.02	4	6	6	1	3	4	10.01	10.01	4	9.01	3	10.01	7.01	7.01	1	0	2	3	4
CBR3__chr21	0	1	5	2	0	1	0	2	1	0	2	2	0	1	0	2	0	1	0	1	1	0	1	0	0	1	5	0	0	4	3	4	2	1	0	2	1	2	7.01	2	2	4	1	2	0	0	4	2	5
CBR4__chr4	0	0	0	0	0	0	1	0	0	0	1	1	0	0	0	0	0	0	1	0	1	0	0	0	0	1	1	0	0	1	1	3	1	0	1	1	0	4	2	3	2	1	1	1	0	0	0	0	2
CBS__chr21	0	0	0	0	0	0	1	0	1	0	0	0	0	1	2	0	0	0	1	0	0	0	0	0	0	0	1	0	0	2	0	0	0	1	0	0	0	1	1	0	0	1	0	2	0	0	0	0	0
CBWD1__chr9	0	0	0	0	0	0	0	0	0	0	0	0	0	0	1	0	0	0	0	0	0	0	0	0	1	0	0	0	0	0	1	0	1	0	0	0	0	0	1	1	0	0	0	0	0	0	0	0	0
CBWD5__chr9	1	0	0	0	0	0	0	0	0	0	0	0	0	0	0	0	0	0	0	0	0	0	0	0	0	0	0	0	0	0	0	0	0	0	0	0	0	0	0	0	0	0	0	0	0	0	0	0	0
CBX1__chr17	10.01	4	9.01	1	0	5	9.01	3	5	0	8.01	17.03	9.01	7.01	12.02	10.01	0	9.01	7.01	2	0	2	12.02	5	9.01	6	7.01	7.01	7.01	16.03	16.03	16.03	11.01	1	14.02	5	15.03	5	20.05	13.02	9.01	17.03	12.02	13.02	0	0	10.01	4	4
CBX2__chr17	0	0	0	0	0	0	0	0	0	0	0	0	0	0	2	0	0	0	0	0	0	0	0	0	0	0	1	0	0	1	0	0	0	0	2	0	0	0	0	1	1	0	0	1	0	0	0	0	0
CBX3P2__chr18	0	0	0	0	0	0	0	0	0	0	0	0	0	0	0	0	0	0	0	0	0	0	0	0	0	0	0	0	1	0	0	0	0	0	0	0	0	0	0	0	0	0	0	0	0	0	0	0	0
[truncated: 13,958 more rows]
[truncated: 335 more columns]
