# Supplementary material for: Time-resolved single-cell sequencing identifies multiple waves of mRNA decay during the mitosis-to-G1 phase transition
Source: eLife. 2022 Feb 1;11:e71356. doi: 10.7554/eLife.71356 (PMC8806192; doi:10.7554/eLife.71356)
Supplement: Source data 3. [file elife-71356-data3.csv]

GENEID	1	2	3	4	5	6	7	8	9	10	11	12	13	14	15	16	17	18	19	20	21	22	23	24	25	26	27	28	29	30	31	32	33	34	35	36	37	38	39	40	41	42	43	44	45	46	47	48	49
A1BG-AS1__chr19	0	0	0	0	0	0	0	0	0	0	0	0	0	0	0	0	0	0	0	0	0	0	0	0	0	0	0	0	0	0	0	0	0	0	0	0	0	0	0	0	0	0	0	0	0	0	0	0	0
A1BG__chr19	0	0	0	0	1	1	0	0	2	0	1	0	0	0	0	1	0	1	0	0	0	0	0	0	1	0	0	0	0	0	0	0	1	0	0	0	0	0	0	0	0	0	0	0	1	0	0	0	0
A1CF__chr10	0	0	0	0	0	0	0	0	0	0	0	0	0	0	0	0	0	0	0	0	0	0	0	0	0	0	0	0	0	0	0	0	0	0	0	0	0	0	0	0	0	0	0	0	0	0	0	0	0
A2ML1__chr12	0	0	0	0	0	0	0	0	0	0	0	0	0	0	0	0	0	0	0	0	0	0	0	0	0	0	0	0	0	0	0	0	0	0	0	0	0	0	1	0	0	0	0	0	0	0	0	0	0
A4GALT__chr22	0	0	0	0	0	0	0	0	0	0	0	0	0	0	0	0	0	0	0	1	0	0	0	0	0	0	0	0	0	0	0	0	0	0	0	0	0	0	0	0	0	0	0	0	1	0	0	0	0
AAAS__chr12	9,01	0	2	10,01	6	3	4	0	16,03	9,01	6	0	3	2	0	9,01	0	8,01	0	8,01	9,01	14,02	0	0	15,03	0	3	5	1	3	9,01	2	11,01	3	0	0	0	0	0	1	0	0	0	10,01	5	9,01	2	9,01	8,01
AACS__chr12	3	0	3	1	2	1	1	0	4	6	1	0	2	2	0	1	0	1	0	2	3	4	0	0	4	0	3	0	0	2	3	0	5	3	0	0	0	0	0	0	0	0	0	4	3	0	1	1	2
AADACL3__chr1	0	0	0	0	0	0	0	0	0	0	0	0	0	0	0	0	0	0	0	0	0	0	0	0	0	0	0	0	0	0	0	0	1	0	0	0	0	0	0	0	0	0	0	0	0	0	0	0	0
AADACL4__chr1	0	0	0	0	0	0	0	0	0	0	0	0	0	0	0	0	0	0	0	0	0	0	0	0	0	0	0	0	0	0	0	0	0	0	0	0	0	0	0	0	0	0	0	0	0	0	0	0	0
AADAC__chr3	0	0	0	0	0	0	0	0	0	0	0	0	0	0	0	0	0	0	0	0	0	0	0	0	0	0	0	0	0	0	0	0	0	0	0	0	0	0	0	0	0	0	0	0	0	0	0	0	0
AADAT__chr4	1	0	1	1	3	0	0	0	3	1	0	0	0	1	0	1	0	1	0	4	1	0	0	0	3	0	0	0	0	0	0	0	2	1	0	0	0	1	0	0	1	0	0	3	0	1	0	2	3
AAED1__chr9	1	0	0	0	2	0	0	0	1	1	0	0	0	0	0	0	0	0	0	1	0	0	0	0	4	0	0	0	0	0	2	0	0	0	0	0	0	0	0	0	0	0	0	1	1	0	0	0	0
AAGAB__chr15	2	0	2	3	2	1	0	0	4	6	1	0	2	0	0	5	0	0	0	3	5	5	0	0	1	0	0	3	0	3	2	0	4	1	0	0	0	0	1	0	0	0	0	1	3	1	1	0	2
AAK1__chr2	5	0	0	3	3	2	2	0	3	1	0	0	1	0	0	0	0	4	0	4	4	7,01	0	0	4	0	2	0	1	0	2	0	3	1	0	0	1	0	0	0	0	0	0	0	2	2	0	6	7,01
AAMDC__chr11	2	0	0	3	1	1	0	0	1	1	0	0	1	1	0	0	0	0	0	0	0	1	0	0	2	0	0	1	0	1	0	0	0	0	0	0	0	0	0	0	0	0	0	0	1	0	0	0	1
AAMP__chr2	6	0	2	7,01	3	5	2	0	4	1	0	0	2	3	0	3	0	2	0	3	1	6	0	0	10,01	0	1	0	0	3	2	0	2	3	0	0	0	0	1	0	0	0	0	0	3	1	2	6	1
AAR2__chr20	4	0	1	4	0	3	1	0	2	2	4	0	3	1	0	1	0	2	0	6	2	4	0	0	3	0	0	0	2	1	2	0	2	0	0	0	0	0	0	0	0	0	0	1	2	2	0	2	3
AARD__chr8	0	0	0	0	0	0	0	0	0	0	0	0	0	0	0	0	0	0	0	0	0	0	0	0	0	0	0	0	0	0	0	0	0	0	0	0	0	0	0	0	0	0	0	0	0	0	0	0	0
AARS2__chr6	0	0	0	4	2	0	0	0	1	1	0	0	0	1	0	0	0	0	0	1	1	1	0	0	1	0	0	0	0	1	0	0	0	0	0	0	0	0	0	0	0	0	0	2	1	0	0	1	2
AARS__chr16	6	0	2	7,01	7,01	5	2	0	7,01	3	3	0	6	4	0	1	0	6	0	11,01	6	6	0	0	7,01	0	4	1	4	2	7,01	0	15,03	2	0	0	0	0	0	0	0	0	0	5	6	4	1	1	10,01
AASDHPPT__chr11	4	0	2	13,02	4	2	4	0	6	10,01	3	0	1	2	0	3	0	4	0	2	5	20,05	0	0	3	0	3	0	0	2	5	0	6	4	0	0	0	0	0	0	0	0	0	5	2	5	5	2	6
AASDH__chr4	1	0	0	2	0	0	0	0	1	1	2	0	0	0	0	0	0	0	0	1	1	1	0	0	0	0	1	0	0	0	0	0	0	3	0	0	0	0	0	0	0	0	0	0	0	0	0	0	1
AASS__chr7	4	0	7,01	2	2	1	2	0	2	3	1	0	1	2	0	0	1	5	0	3	5	3	0	0	3	1	2	1	2	5	1	0	2	7,01	0	0	0	0	0	0	1	0	0	10,01	17,03	1	0	5	0
AATF__chr17	4	0	1	6	5	1	1	0	5	3	4	0	0	4	0	2	0	6	0	4	8,01	2	0	0	5	0	1	1	1	0	5	0	3	0	0	1	0	0	0	0	0	0	0	5	1	3	1	1	1
ABAT__chr16	0	0	0	0	0	0	0	0	0	0	0	0	0	0	0	0	0	0	0	0	0	0	0	0	0	0	0	0	0	0	0	0	0	0	0	0	0	0	0	0	0	0	0	0	0	0	0	0	0
ABCA10__chr17	0	0	0	1	0	0	0	0	0	0	0	0	0	0	0	0	0	0	0	0	0	0	0	0	0	0	0	0	0	0	0	0	0	0	0	0	0	0	0	0	0	0	0	0	0	0	0	0	0
ABCA11P__chr4	0	0	0	0	0	0	0	0	1	0	0	0	0	0	0	0	0	0	0	0	0	0	0	0	0	0	0	0	0	0	0	0	0	0	0	0	0	0	0	0	0	0	0	0	0	0	0	0	0
ABCA12__chr2	0	0	0	0	0	0	0	0	0	0	0	0	0	0	0	0	0	0	0	0	0	1	0	0	0	0	0	0	0	0	0	0	0	0	0	0	0	0	0	0	0	0	0	0	0	0	0	0	0
ABCA13__chr7	0	0	0	0	0	0	0	0	0	0	0	0	0	0	0	0	0	0	0	0	0	0	0	0	0	0	0	0	0	0	0	0	0	0	0	0	0	0	0	0	0	0	0	0	0	0	0	0	0
ABCA17P__chr16	0	0	0	0	0	0	0	0	0	0	0	0	0	0	0	0	0	0	0	0	0	0	0	0	0	0	0	0	0	0	0	0	0	0	0	0	0	0	0	0	0	0	0	0	0	0	0	0	0
ABCA1__chr9	1	0	6	1	0	0	1	0	0	0	0	0	0	4	0	0	0	2	0	3	0	1	0	0	0	0	0	0	2	6	0	0	0	0	0	0	0	0	0	0	0	0	0	7,01	11,01	0	0	0	0
ABCA2__chr9	0	0	0	1	0	0	0	0	1	1	1	0	1	0	0	2	0	0	0	3	2	1	0	0	3	0	1	0	0	2	1	0	3	0	0	0	0	0	0	0	0	0	0	0	1	0	1	0	3
ABCA3__chr16	0	0	0	0	0	0	0	0	0	0	0	0	0	0	0	2	0	0	0	1	0	1	0	0	0	0	0	0	0	0	0	0	1	1	0	0	0	0	0	0	0	0	0	0	0	0	0	0	0
ABCA4__chr1	0	0	0	0	0	0	0	0	0	0	0	0	0	0	0	0	0	0	0	0	0	0	0	0	0	0	0	0	0	0	0	0	0	0	0	0	0	0	0	0	0	0	0	0	0	0	0	0	0
ABCA5__chr17	0	0	0	0	0	0	0	0	0	0	0	0	0	0	0	0	0	0	0	0	0	0	0	0	0	0	0	0	0	0	0	0	0	0	0	1	0	0	0	0	0	0	0	0	1	0	0	0	0
ABCA7__chr19	0	0	1	0	0	0	1	0	0	0	0	0	0	0	0	0	0	0	0	0	0	0	0	0	0	0	0	0	0	0	0	0	0	2	0	0	0	0	0	0	0	0	0	1	1	0	0	1	0
ABCA9__chr17	1	0	0	0	0	0	0	0	0	0	0	0	0	0	0	0	0	0	0	0	0	0	0	0	0	0	0	0	0	0	0	0	0	0	0	0	0	0	0	0	0	0	0	0	0	0	0	0	0
ABCB10__chr1	0	0	0	1	1	0	2	0	1	2	0	0	0	0	0	1	0	2	0	0	4	0	0	0	2	0	2	0	0	3	0	0	4	0	0	0	0	0	0	0	0	0	0	1	0	0	1	1	2
ABCB5__chr7	1	0	0	0	0	0	0	0	0	0	0	0	0	0	0	0	0	0	0	0	0	0	0	0	0	0	0	0	0	0	0	0	0	0	0	0	0	0	0	0	0	0	0	0	0	0	0	0	1
ABCB6__chr2	0	0	0	0	0	0	3	0	0	0	0	0	0	0	0	1	0	0	0	1	0	0	0	0	1	0	1	0	0	1	0	0	1	0	0	0	0	0	0	0	0	0	0	0	0	3	0	0	0
ABCB7__chrX	1	0	0	0	0	1	0	0	1	2	0	0	0	1	0	1	0	1	0	1	0	2	0	0	0	0	1	0	1	1	0	0	0	0	0	0	0	0	0	0	0	0	0	1	2	1	0	1	0
ABCB8__chr7	0	0	0	2	0	1	1	0	0	1	2	0	0	0	0	2	0	3	0	0	1	1	0	0	2	0	0	0	0	0	1	0	2	0	0	0	0	0	0	0	0	0	0	3	0	0	2	0	2
ABCB9__chr12	3	0	0	1	0	0	1	0	2	1	0	0	0	1	0	0	0	2	1	2	0	0	0	0	0	0	0	2	2	0	1	0	0	1	0	0	0	0	0	0	0	0	0	1	3	0	4	0	3
ABCC10__chr6	0	0	1	3	4	5	0	0	0	4	0	0	0	2	0	4	0	0	0	3	0	3	0	0	0	0	0	0	0	0	2	0	2	0	0	0	0	0	0	0	0	0	0	1	0	0	4	0	0
ABCC13__chr21	0	0	0	0	0	0	0	0	0	0	0	0	0	0	0	0	0	0	0	0	0	1	0	0	0	0	0	0	0	0	0	0	0	0	0	0	0	0	0	0	0	0	0	0	0	0	0	0	0
ABCC1__chr16	5	0	4	1	2	2	1	0	1	1	1	0	0	7,01	0	0	0	0	0	1	3	2	0	0	4	0	0	0	0	3	2	0	1	3	0	0	0	0	0	0	0	0	0	4	1	4	2	0	2
ABCC2__chr10	0	0	0	0	0	0	0	0	0	0	0	0	0	0	0	0	0	0	0	0	0	0	0	0	0	0	0	0	0	0	0	0	0	0	0	0	0	0	0	0	0	0	0	0	0	0	0	0	0
ABCC3__chr17	2	0	3	1	0	0	5	0	0	0	3	0	0	0	0	0	0	3	0	5	1	2	0	0	0	0	6	0	1	6	0	0	0	0	0	0	0	0	0	0	0	0	0	7,01	2	0	0	9,01	0
ABCC4__chr13	4	0	1	1	1	0	0	0	4	2	0	0	1	3	0	1	0	1	0	1	2	0	0	0	6	0	0	1	0	1	0	0	1	2	0	0	0	0	0	0	0	0	0	0	5	1	1	1	0
ABCC5__chr3	3	0	1	3	0	0	0	0	0	1	1	0	0	0	0	2	0	1	0	1	0	3	0	0	3	0	1	0	1	3	1	0	2	0	0	0	0	0	0	0	0	0	0	2	2	0	0	0	2
ABCC6__chr16	0	0	0	0	0	0	0	0	0	0	0	0	0	0	0	0	0	0	0	0	0	0	0	0	0	0	0	0	0	0	0	0	0	0	0	0	0	0	0	0	0	0	0	0	0	0	0	0	0
ABCC9__chr12	0	0	0	0	0	0	0	0	0	0	0	0	0	0	0	0	0	0	0	0	0	0	0	0	0	0	0	0	0	0	0	0	0	0	0	0	0	0	0	0	0	0	0	1	0	0	0	0	0
ABCD1__chrX	0	0	1	1	0	0	0	0	5	1	2	0	1	3	0	4	0	1	0	1	4	2	0	0	2	0	0	0	0	7,01	1	0	2	0	0	0	0	0	0	0	0	0	0	0	0	0	5	3	1
ABCD3__chr1	5	0	0	3	5	4	5	0	7,01	6	1	0	1	3	0	2	1	2	0	3	2	6	0	0	5	0	1	5	1	5	4	0	9,01	6	0	0	0	0	0	0	0	0	0	3	7,01	0	3	2	10,01
ABCD4__chr14	0	0	0	3	1	2	1	0	0	0	2	0	0	0	0	2	0	1	0	1	1	0	0	0	1	0	0	0	0	2	0	0	1	0	0	0	0	0	0	0	0	0	0	0	0	3	0	2	1
ABCE1__chr4	10,01	0	3	19,04	14,02	13,02	0	0	14,02	10,01	7,01	1	9,01	8,01	0	13,02	0	14,02	0	6	21,05	21,05	0	0	19,04	0	3	5	3	0	12,02	0	19,04	5	0	0	0	0	0	0	0	0	1	1	1	14,02	9,01	10,01	15,03
ABCF1__chr6	8,01	0	2	2	5	6	0	0	7,01	3	5	0	1	2	0	3	0	2	0	4	4	6	0	0	8,01	0	1	1	1	2	0	0	3	0	0	0	0	0	0	0	0	0	0	1	3	4	4	4	3
ABCF2__chr7	6	0	3	14,02	7,01	2	0	0	5	6	5	0	7,01	3	0	6	0	4	0	5	8,01	2	0	0	7,01	0	0	1	0	0	13,02	0	8,01	0	0	0	0	0	1	0	0	0	0	3	3	3	0	3	8,01
ABCF3__chr3	0	0	1	2	1	1	1	0	2	1	0	0	2	2	0	4	0	0	0	2	2	4	0	0	0	0	0	0	0	0	4	0	4	1	0	0	0	0	0	0	0	0	0	0	1	1	1	1	2
ABCG1__chr21	0	0	0	0	0	0	0	0	0	0	0	0	0	0	0	0	0	0	0	0	0	0	0	0	0	0	0	0	0	0	0	0	0	0	0	0	1	0	0	0	0	0	0	0	0	0	0	0	0
ABCG2__chr4	0	0	0	2	0	0	0	0	0	0	0	0	0	0	0	0	0	0	0	2	0	0	0	0	0	0	0	0	0	0	0	0	2	0	0	0	0	0	0	0	0	0	0	0	0	0	0	0	0
ABCG4__chr11	0	0	0	0	0	0	0	0	0	0	0	0	0	0	0	0	0	0	0	0	0	0	0	0	0	0	0	0	0	0	0	0	0	0	0	0	0	0	0	0	0	0	0	0	0	0	0	0	0
ABHD10__chr3	2	0	1	0	3	1	0	0	8,01	2	0	0	1	4	0	2	0	0	0	3	1	3	0	0	6	0	1	1	0	0	2	0	3	0	0	0	0	0	0	0	0	0	0	1	1	0	1	1	5
ABHD11-AS1__chr7	0	0	0	0	0	0	0	0	0	0	0	0	0	0	0	0	0	0	0	0	0	0	0	0	0	0	0	0	0	0	0	0	0	0	0	0	0	0	0	0	0	0	0	0	0	0	0	0	0
ABHD11__chr7	0	0	0	1	0	0	0	0	1	1	0	0	0	0	0	5	0	1	0	1	5	2	0	0	0	0	0	1	0	0	4	0	2	0	0	0	0	0	0	0	0	0	0	0	1	2	1	1	1
ABHD12B__chr14	0	0	0	0	0	0	0	0	0	0	0	0	0	0	0	0	0	0	0	0	0	0	0	0	0	0	0	0	0	0	0	0	0	0	0	0	0	0	0	0	0	0	0	0	0	0	0	0	0
ABHD12__chr20	7,01	0	1	15,03	3	0	1	0	13,02	9,01	4	0	4	4	0	2	0	3	0	5	7,01	8,01	0	0	5	0	0	0	2	4	6	0	10,01	5	0	1	0	0	0	0	0	0	0	2	5	5	5	6	6
ABHD13__chr13	3	0	0	3	0	2	0	0	3	1	0	0	4	6	0	0	0	2	0	1	0	1	0	0	1	0	0	0	0	0	0	0	1	1	0	0	0	0	0	0	0	0	0	1	1	0	1	1	2
ABHD14A__chr3	1	0	0	1	0	2	0	0	3	1	2	0	3	3	0	1	0	1	0	0	0	2	0	0	2	0	1	0	0	3	1	0	1	2	0	0	0	0	0	0	0	0	0	1	4	1	1	2	1
ABHD14B__chr3	0	0	0	3	2	3	3	0	2	0	2	0	3	3	0	0	0	0	0	0	0	1	0	0	3	0	0	0	2	4	3	0	0	1	0	0	0	0	0	0	0	0	0	0	0	0	1	0	2
ABHD15__chr17	0	0	1	1	1	0	0	0	0	0	0	0	0	0	0	0	0	0	0	3	0	1	0	0	0	0	0	0	0	0	0	0	0	0	0	0	0	0	0	0	0	0	0	1	0	0	0	0	1
ABHD16A__chr6	5	0	5	4	5	1	0	0	5	3	5	1	3	4	0	4	0	2	0	2	4	7,01	0	0	10,01	0	1	1	2	4	0	0	0	3	0	0	0	0	0	0	0	0	0	0	4	2	3	2	7,01
ABHD1__chr2	0	0	0	0	0	0	0	0	0	0	0	0	0	0	0	0	0	0	0	0	0	0	0	0	0	0	0	0	0	0	0	0	0	0	0	0	0	0	0	0	0	0	0	0	0	1	0	0	0
ABHD2__chr15	6	0	2	10,01	5	1	2	0	8,01	6	3	0	2	6	0	6	0	1	0	8,01	10,01	4	0	0	4	0	1	1	0	1	10,01	0	11,01	8,01	0	0	0	0	0	0	0	0	0	6	6	4	5	2	12,02
ABHD3__chr18	1	0	0	2	2	0	1	0	0	0	2	0	1	0	0	2	0	0	0	0	0	6	0	0	0	0	0	1	0	0	1	0	2	0	0	0	0	0	0	0	0	0	0	0	1	0	3	0	0
ABHD4__chr14	3	0	6	4	1	8,01	6	0	1	1	3	0	6	0	1	5	0	3	0	11,01	4	3	0	0	5	0	3	2	2	5	2	1	4	2	0	0	0	0	0	0	0	0	0	5	5	1	1	2	4
ABHD5__chr3	2	2	0	2	3	4	5	0	4	5	3	0	0	3	0	1	0	4	0	1	4	3	0	0	4	0	0	1	0	0	0	0	4	0	0	0	0	0	1	0	0	0	1	1	5	2	1	0	1
ABHD6__chr3	1	0	0	2	0	0	0	0	0	1	2	0	0	0	0	1	0	0	0	1	0	1	0	0	0	0	0	0	0	3	2	0	0	0	0	0	0	0	0	0	0	0	0	1	0	1	0	0	0
ABHD8__chr19	0	0	0	0	0	1	0	0	2	2	1	0	0	0	0	1	0	1	0	1	1	1	0	0	0	0	0	1	0	1	0	0	1	0	0	0	0	0	0	0	0	0	0	1	1	0	0	0	0
ABI1__chr10	5	0	4	3	3	3	1	0	8,01	6	1	0	6	5	0	2	0	1	0	11,01	1	2	0	0	8,01	0	2	0	0	3	2	0	6	6	0	0	0	0	0	1	0	0	0	6	4	1	1	6	10,01
ABI2__chr2	11,01	0	2	5	8,01	2	5	0	12,02	6	3	0	3	11,01	0	7,01	0	5	0	10,01	2	15,03	0	0	9,01	0	3	2	2	2	11,01	0	10,01	2	0	0	0	0	0	0	0	0	0	4	5	3	4	6	5
ABI3BP__chr3	0	0	0	0	0	0	0	0	0	0	0	0	0	0	0	0	0	0	0	0	0	0	0	0	0	0	0	0	0	0	0	0	0	0	0	0	0	0	0	0	0	0	0	0	0	0	0	0	0
ABI3__chr17	0	0	0	0	0	0	0	0	0	0	0	0	0	0	0	0	0	0	0	0	0	0	0	0	0	0	0	0	0	0	0	0	0	0	0	0	0	0	0	0	0	0	0	0	0	0	0	0	0
ABL1__chr9	16,03	0	3	11,01	3	6	5	0	7,01	7,01	0	0	1	9,01	0	8,01	0	2	0	7,01	5	6	0	0	5	0	2	1	1	1	2	0	13,02	1	0	0	1	0	1	0	0	0	0	2	5	3	3	11,01	10,01
ABL2__chr1	13,02	0	2	2	11,01	11,01	4	0	3	4	4	0	3	2	0	4	0	2	0	14,02	7,01	5	0	0	32,12	0	1	4	2	0	3	0	14,02	2	0	0	0	0	0	0	0	0	1	5	0	2	4	0	8,01
ABLIM1__chr10	1	0	3	3	0	1	1	0	3	0	0	0	1	0	0	0	0	0	0	4	4	2	0	0	0	0	1	1	1	2	1	0	1	4	0	0	0	0	0	0	0	0	0	6	8,01	0	0	4	4
ABLIM2__chr4	0	0	0	0	0	0	0	0	0	0	0	0	0	0	0	0	0	0	0	0	0	0	0	0	0	0	0	0	0	0	0	0	0	0	0	0	0	0	0	0	0	0	0	0	0	0	0	0	0
ABLIM3__chr5	2	0	1	2	5	2	1	0	0	1	1	0	4	2	0	6	0	4	0	5	1	0	0	0	3	0	1	0	1	1	2	0	2	0	0	0	0	0	0	0	0	0	0	4	6	3	1	3	3
ABRACL__chr6	6	0	0	7,01	4	3	2	0	12,02	7,01	4	0	3	1	0	2	0	6	0	5	5	5	0	1	4	0	4	0	0	3	2	0	8,01	1	0	0	0	0	0	0	0	0	0	1	1	8,01	6	1	1
ABR__chr17	2	0	1	9,01	3	4	1	0	9,01	1	1	0	3	1	0	2	0	4	0	7,01	2	4	0	0	4	0	0	0	0	2	6	0	4	1	0	0	0	0	0	0	0	0	0	4	5	2	0	4	5
ABT1__chr6	2	0	2	3	3	1	2	0	4	1	1	0	1	1	0	4	0	2	0	0	0	2	0	0	3	0	0	2	0	1	3	0	5	3	0	0	0	0	0	0	0	0	0	0	2	5	1	0	5
ABTB1__chr3	0	0	1	0	0	1	0	0	0	0	0	0	0	0	0	0	0	0	0	1	0	0	0	0	0	0	3	0	0	1	0	0	0	0	0	0	0	0	0	0	0	0	0	0	0	0	0	2	1
ABTB2__chr11	4	0	0	1	1	2	0	0	2	1	0	0	0	0	0	0	0	1	0	1	0	1	0	0	0	0	0	0	0	0	1	0	0	0	0	0	0	0	0	0	0	0	0	1	0	0	0	2	0
ACAA1__chr3	1	0	2	1	0	1	1	0	1	3	2	0	0	0	0	2	0	1	0	3	0	2	0	0	0	0	0	1	2	2	5	0	2	0	0	0	0	0	0	0	0	0	0	1	1	2	1	2	2
ACAA2__chr18	4	0	1	5	1	1	1	0	3	2	1	0	2	2	0	2	0	2	0	5	3	1	0	0	0	0	3	0	1	1	2	0	5	1	0	0	0	0	0	0	0	0	0	3	1	1	1	3	4
ACACA__chr17	3	0	0	2	1	1	0	0	1	3	3	0	0	0	0	3	0	2	0	1	2	4	0	0	2	0	0	1	0	0	1	0	2	0	0	0	0	0	0	0	0	0	0	1	0	1	0	0	1
ACACB__chr12	0	0	0	0	0	0	0	0	0	0	0	0	0	0	0	0	0	2	0	0	0	0	0	0	0	0	0	0	0	0	0	0	0	0	0	0	0	0	0	0	0	0	0	0	0	0	0	0	0
ACAD10__chr12	0	0	0	0	0	0	0	0	1	0	0	1	0	1	0	0	0	1	0	1	1	1	0	0	1	0	0	0	0	0	0	0	0	3	0	0	0	0	0	0	0	0	0	1	1	0	0	1	1
ACAD8__chr11	2	0	1	1	1	1	2	0	2	1	0	0	0	1	0	1	0	0	0	3	2	1	0	1	2	0	0	0	0	0	0	0	0	0	0	0	0	0	0	0	0	0	0	0	1	1	0	1	1
ACAD9__chr3	1	0	1	5	3	1	0	0	2	4	2	0	0	2	0	1	0	3	0	0	2	6	0	0	2	0	0	1	0	2	1	0	2	1	0	0	0	0	0	0	0	0	0	4	2	3	4	1	1
ACADL__chr2	0	0	0	0	0	0	0	0	2	0	0	0	0	0	0	0	0	0	0	0	0	0	0	0	0	0	0	0	0	0	0	0	0	0	0	0	0	0	0	0	0	0	0	0	0	0	0	0	1
ACADM__chr1	1	0	2	2	6	0	3	0	8,01	3	0	0	1	4	0	1	0	1	0	3	2	5	0	0	4	0	0	1	0	2	1	0	5	1	0	0	0	0	0	0	0	0	0	1	0	1	1	1	0
ACADSB__chr10	4	0	1	1	1	0	2	0	1	8,01	1	0	2	2	0	2	0	1	0	4	1	1	0	0	8,01	0	1	0	0	1	1	0	3	1	0	0	0	0	2	0	0	0	0	1	2	0	0	1	2
ACADS__chr12	0	0	0	0	0	0	0	0	0	1	0	0	0	0	0	0	0	0	0	0	0	0	0	0	0	0	0	0	0	0	0	0	0	0	0	0	0	0	0	0	0	0	0	0	0	0	0	0	0
ACADVL__chr17	16,03	0	5	16,03	7,01	13,02	6	0	6	8,01	3	0	4	12,02	0	7,01	0	5	1	9,01	4	15,03	0	0	18,04	0	2	3	6	7,01	8,01	0	16,03	11,01	0	0	0	0	0	0	0	0	0	16,03	13,02	5	3	8,01	11,01
ACAP1__chr17	0	0	0	0	0	0	0	0	0	0	0	0	0	0	0	0	0	0	0	0	0	0	0	0	0	0	0	0	0	0	0	0	0	0	0	0	0	0	0	0	0	0	0	0	0	0	0	0	0
ACAP2__chr3	0	0	0	3	4	3	4	0	4	5	0	0	2	3	0	1	0	3	0	8,01	1	5	0	0	1	0	2	0	1	1	1	0	4	3	0	0	0	1	0	0	0	0	0	1	4	0	0	0	4
ACAP3__chr1	1	0	0	4	2	2	0	0	0	0	1	0	0	1	0	2	0	0	0	0	4	0	0	0	1	0	1	0	1	0	1	0	2	0	0	1	0	1	0	0	0	0	0	0	1	0	0	0	1
ACAT1__chr11	2	0	0	4	2	2	2	0	6	3	5	0	1	3	0	5	0	5	0	7,01	2	5	0	0	3	0	1	4	1	0	1	0	4	3	0	0	0	0	0	0	0	0	0	5	1	1	1	2	2
ACAT2__chr6	1	0	0	2	2	1	0	0	0	0	0	0	0	0	0	0	0	1	0	0	0	1	0	0	1	0	0	0	0	0	0	0	0	0	0	0	0	0	0	0	0	0	0	0	1	0	0	0	2
ACBD3__chr1	3	0	0	4	3	1	0	0	7,01	4	3	1	0	7,01	0	3	0	5	0	5	2	5	0	0	2	0	0	1	1	6	2	0	5	3	0	0	0	0	0	0	0	0	0	0	1	0	1	3	3
ACBD4__chr17	0	0	2	8,01	1	1	0	0	1	1	0	0	0	0	0	0	0	0	0	1	1	0	0	0	0	0	0	0	2	0	0	0	1	0	0	0	0	0	0	0	0	0	0	0	2	0	1	5	0
ACBD5__chr10	1	0	0	5	0	3	1	0	2	4	1	0	1	1	0	0	0	0	0	3	0	0	0	0	2	0	2	0	0	1	1	0	1	3	0	0	0	0	0	0	0	0	0	0	0	1	0	1	1
ACBD6__chr1	5	1	2	5	5	6	1	0	6	2	2	0	3	0	0	2	0	1	0	6	5	3	1	0	2	0	2	1	2	0	6	0	9,01	5	1	0	0	0	0	0	0	0	0	4	3	1	2	5	10,01
ACBD7__chr10	0	0	0	0	1	0	0	0	0	0	0	0	0	0	0	0	0	1	0	1	0	0	0	0	1	0	0	0	0	0	1	0	1	1	0	0	0	0	0	0	0	0	0	0	0	1	0	0	0
ACCSL__chr11	0	0	0	0	0	0	0	0	0	0	0	0	0	0	0	0	0	0	0	0	0	0	0	0	0	0	0	0	0	0	0	0	0	0	0	0	0	0	0	0	0	0	0	0	0	0	0	0	0
ACCS__chr11	0	0	0	0	0	1	0	0	0	0	0	0	0	0	0	0	0	0	0	0	0	0	0	0	0	0	0	0	0	0	0	0	0	0	0	0	0	0	0	0	0	0	0	0	1	0	0	0	0
ACD__chr16	1	0	1	2	0	2	0	0	1	1	1	0	1	0	0	0	0	3	0	1	1	2	0	0	4	0	1	0	0	0	1	0	4	1	0	0	0	0	0	0	0	0	0	2	0	1	0	2	2
ACER3__chr11	2	0	0	0	1	0	0	0	2	1	0	0	0	2	0	3	0	0	0	0	0	1	0	0	1	0	0	0	0	0	2	0	0	0	0	0	0	0	0	0	0	0	0	0	0	0	0	0	2
ACE__chr17	1	0	0	1	0	0	1	0	0	0	0	0	0	0	0	0	0	0	0	0	0	0	0	0	1	0	1	0	0	0	0	0	0	0	0	0	0	0	0	0	0	0	0	0	0	0	0	0	0
ACIN1__chr14	12,02	0	10,01	15,03	17,03	10,01	8,01	0	11,01	15,03	11,01	0	12,02	11,01	0	8,01	0	11,01	0	17,03	9,01	19,04	0	0	11,01	0	5	4	8,01	6	8,01	1	18,04	9,01	0	1	0	0	1	0	0	0	2	4	18,04	7,01	7,01	16,03	10,01
ACLY__chr17	8,01	0	3	21,05	9,01	11,01	5	0	15,03	13,02	9,01	0	12,02	6	0	15,03	1	7,01	0	11,01	8,01	12,02	0	0	14,02	0	1	5	3	3	5	0	28,09	4	0	0	0	1	0	0	0	0	0	6	8,01	5	4	10,01	18,04
ACN9__chr7	1	0	0	0	2	0	0	0	0	0	0	0	0	0	0	1	0	1	0	2	0	1	0	0	1	0	0	0	0	0	0	0	0	0	0	0	0	0	0	0	0	0	0	0	1	0	0	2	1
ACO1__chr9	3	0	5	4	5	2	0	0	1	6	1	0	0	1	0	3	0	3	0	14,02	0	6	0	0	5	0	3	1	2	1	1	0	8,01	4	0	0	0	0	0	0	0	0	1	4	5	4	2	0	4
ACO2__chr22	0	0	0	0	0	0	0	0	0	0	0	0	0	0	0	0	0	0	0	0	0	0	0	0	0	0	0	0	0	0	0	0	0	0	0	0	0	0	0	0	0	0	0	0	0	0	0	0	0
ACOT11__chr1	0	0	0	0	0	0	0	0	0	0	0	0	0	0	0	0	0	0	0	0	0	1	0	0	0	0	0	0	0	0	0	0	0	0	0	0	0	0	1	0	0	0	0	0	0	0	0	0	0
ACOT13__chr6	2	0	0	0	0	0	1	0	0	0	1	0	0	0	0	1	0	0	0	2	0	3	0	0	0	0	1	1	1	0	0	0	3	1	0	0	0	0	0	0	0	0	0	1	3	1	0	2	1
ACOT2__chr14	0	0	0	0	0	0	0	0	0	0	0	0	0	0	0	0	0	0	0	0	0	0	0	0	1	0	0	0	0	0	0	0	0	0	0	0	0	0	0	0	0	0	0	0	0	0	0	0	0
ACOT4__chr14	0	0	0	0	0	0	0	0	0	0	0	0	0	0	0	0	0	0	0	0	0	0	0	0	0	0	0	0	0	0	0	0	0	0	0	0	0	0	0	0	0	0	0	0	0	0	0	0	0
ACOT7__chr1	2	0	2	18,04	7,01	8,01	1	0	22,06	8,01	2	0	9,01	4	0	9,01	0	6	0	11,01	6	10,01	0	0	12,02	0	0	1	2	2	12,02	0	27,09	6	0	0	0	0	0	0	0	0	0	8,01	1	5	3	1	14,02
ACOT8__chr20	0	0	0	0	0	0	0	0	2	0	0	0	1	0	0	1	0	0	0	0	0	1	0	0	0	0	0	0	0	0	0	0	0	0	0	0	0	0	0	0	0	0	0	0	0	0	0	1	1
ACOT9__chrX	3	0	1	7,01	4	5	0	0	3	3	2	0	1	0	0	1	0	1	0	8,01	5	1	0	0	3	0	0	2	1	3	5	0	9,01	1	0	0	0	0	0	0	0	0	0	4	1	1	2	1	3
ACOX1__chr17	3	0	1	2	0	2	0	0	1	0	0	0	3	2	0	1	0	0	0	3	0	0	0	0	4	0	0	1	0	0	0	0	1	0	0	0	0	0	0	1	0	0	1	1	3	0	0	1	3
ACOX2__chr3	1	0	0	0	0	0	0	0	0	0	0	0	1	0	0	0	0	0	0	2	0	0	0	0	1	0	1	1	0	0	0	0	0	0	0	0	0	0	0	0	0	0	0	2	0	0	0	1	0
ACOX3__chr4	1	0	1	3	0	1	0	0	0	1	0	0	0	0	0	0	0	0	0	0	1	0	0	0	0	0	0	0	1	0	0	0	1	0	0	0	0	0	0	0	0	0	0	1	0	0	0	0	1
ACP1__chr2	5	0	6	20,05	4	8,01	4	0	4	6	7,01	0	2	3	0	7,01	0	8,01	0	11,01	9,01	8,01	0	0	4	0	0	7,01	1	3	7,01	0	11,01	5	0	0	0	0	1	1	0	0	0	3	5	8,01	3	7,01	15,03
ACP2__chr11	0	0	0	0	0	0	0	0	3	0	0	0	1	0	0	2	0	2	0	0	0	0	0	0	1	0	0	0	0	0	0	0	0	0	0	0	0	0	0	0	0	0	0	2	3	0	0	0	0
ACP6__chr1	1	0	0	1	0	1	0	0	1	0	0	0	1	1	0	1	0	1	0	2	0	0	0	0	0	0	0	0	0	1	0	0	0	0	0	0	0	0	0	0	0	0	0	0	0	0	0	1	2
ACPL2__chr3	0	0	0	1	0	1	0	0	0	0	0	0	0	0	0	0	0	0	0	0	1	0	0	0	1	0	0	0	0	1	0	0	0	0	0	0	0	0	0	0	0	0	0	0	1	0	0	2	2
ACPP__chr3	0	0	0	0	0	0	0	0	0	0	0	0	0	0	0	0	0	0	0	0	0	1	0	0	0	0	0	0	0	0	0	0	0	0	0	0	0	0	0	0	0	0	0	0	0	0	0	0	0
ACRBP__chr12	0	0	0	0	0	0	0	0	0	0	0	0	0	0	0	0	0	0	0	0	0	0	0	0	0	0	0	0	0	0	0	0	0	0	0	0	0	0	0	0	0	0	0	0	0	0	0	0	0
ACRC__chrX	0	0	0	1	0	0	0	0	0	0	1	0	0	0	0	0	0	0	0	0	0	0	0	0	0	0	0	0	0	0	0	0	0	0	0	0	0	0	0	0	0	0	0	0	0	0	0	1	0
ACSF2__chr17	0	0	1	0	0	1	0	0	0	0	0	0	1	1	0	1	0	0	0	1	0	2	0	0	2	0	0	0	0	0	1	0	0	3	0	0	0	0	1	0	0	0	0	0	3	0	0	1	1
ACSF3__chr16	2	0	0	0	0	4	1	0	2	0	0	0	0	0	0	1	0	2	0	0	1	1	0	0	2	0	1	0	0	2	1	0	0	1	0	0	0	0	0	0	0	0	0	3	3	0	0	1	3
ACSL1__chr4	1	0	0	1	1	1	0	0	0	3	0	0	1	0	0	0	0	1	0	2	1	4	0	0	0	0	0	1	0	0	0	0	4	0	0	0	0	0	0	0	0	0	0	3	0	1	1	1	0
ACSL3__chr2	5	0	3	8,01	0	1	3	0	4	4	2	0	1	1	0	4	0	3	0	8,01	4	13,02	0	0	11,01	0	3	0	0	1	3	0	13,02	2	0	0	0	0	0	0	0	0	0	1	2	0	2	1	6
ACSL4__chrX	15,03	0	4	11,01	4	4	2	0	2	7,01	4	0	7,01	7,01	0	2	0	9,01	0	7,01	7,01	4	0	0	10,01	0	1	3	0	2	5	0	20,05	4	0	0	0	0	0	0	0	0	1	3	4	0	3	1	6
ACSL5__chr10	0	0	0	0	1	0	0	0	0	0	1	0	0	0	0	0	0	0	0	0	0	0	0	0	0	0	0	0	1	0	1	0	0	2	0	0	0	0	0	0	0	0	0	0	0	0	0	1	0
ACSL6__chr5	0	0	0	0	0	0	0	0	0	0	0	0	0	0	0	0	0	0	0	0	0	0	0	0	0	0	0	0	0	0	0	0	0	0	0	0	0	0	0	0	0	0	0	0	0	0	0	0	0
ACSM2A__chr16	0	0	0	0	0	0	0	0	0	0	0	0	0	0	0	0	0	0	0	0	0	0	0	0	0	0	0	0	0	0	0	0	0	0	0	0	0	0	0	0	0	0	0	0	0	0	0	0	0
ACSM3__chr16	0	0	0	0	0	0	0	0	0	0	0	0	0	0	0	0	0	0	0	0	0	0	0	0	0	0	0	0	0	0	0	0	0	0	0	0	0	0	0	0	0	0	0	0	0	0	0	0	0
ACSM5__chr16	0	0	0	0	0	0	0	0	0	0	0	0	0	0	0	0	0	0	0	0	0	0	0	0	0	0	0	0	0	0	0	0	0	0	0	0	0	0	0	0	0	0	0	0	0	0	0	0	0
ACSS1__chr20	0	0	0	0	0	0	0	0	0	0	0	0	0	0	0	0	0	0	0	0	0	0	0	0	0	0	0	0	0	0	0	0	0	0	0	0	0	0	0	0	0	0	0	0	0	0	0	0	0
ACSS2__chr20	0	0	1	0	0	0	0	0	0	0	1	0	0	3	0	1	0	0	0	1	0	2	0	0	0	0	0	0	0	1	3	0	0	0	0	0	0	0	0	0	0	0	0	1	2	0	0	3	0
ACSS3__chr12	0	0	0	0	0	0	0	0	0	0	0	0	1	0	0	0	0	0	0	0	0	0	0	0	0	0	0	1	0	0	0	0	0	0	0	0	0	0	0	0	0	0	0	0	0	0	0	0	1
ACTA1__chr1	0	0	0	0	0	0	0	0	0	0	0	0	0	0	0	0	0	0	0	0	0	0	0	0	0	0	0	0	0	0	0	0	0	0	0	0	0	0	0	0	0	0	0	0	0	0	0	0	0
ACTA2__chr10	4	1	1	2	3	5	11,01	0	6	9,01	9,01	0	4	3	0	4	1	1	0	2	4	9,01	0	0	15,03	0	1	0	5	12,02	4	0	2	5	0	0	0	0	0	0	0	0	0	6	7,01	4	4	1	34,14
ACTBL2__chr5	0	0	0	0	0	0	0	0	0	0	0	0	0	0	0	0	0	0	0	0	0	0	0	0	0	0	0	0	0	0	0	0	0	0	0	0	0	0	0	0	0	0	0	0	0	0	0	0	2
ACTB__chr7	645,18	8,01	217,66	1171,54	666,3	433,06	206,07	5	878,79	736,31	366,91	12,02	382,25	245,16	0	596,31	0	483,38	1	762,73	685,17	429,73	5	8,01	803,89	5	184,05	206,07	157,99	368,01	581,3	4	1067,72	377,86	8,01	6	9,01	12,02	9,01	10,01	12,02	5	21,05	333,15	228,21	389,94	305,05	174,65	1202,27
ACTC1__chr15	0	0	0	0	0	0	0	0	0	0	0	0	0	0	0	0	0	0	0	0	0	0	0	0	0	0	0	0	0	0	0	0	0	0	0	0	0	0	0	0	0	0	0	0	0	0	0	0	0
ACTG1P4__chr1	0	0	0	0	0	0	0	0	1	0	0	0	0	0	0	0	0	0	0	0	0	0	0	0	0	0	0	0	0	0	0	0	0	0	0	0	0	0	0	0	0	0	0	0	0	0	0	0	0
ACTG1__chr17	337,49	3	191,38	823,4	444,19	277,14	160,07	1	613,7	462,06	238,8	2	208,18	148,65	2	358,17	1	287,85	0	376,77	426,4	307,2	0	2	402,06	1	166,31	87,93	62,47	378,96	313,67	4	644,01	200,82	7,01	5	5	1	2	4	4	0	7,01	383,35	201,87	207,13	159,03	144,5	658,07
ACTG2__chr2	0	0	0	1	0	0	0	0	0	0	0	0	0	0	0	0	0	0	0	0	0	0	0	0	0	0	0	0	0	1	0	0	0	0	0	0	0	0	0	0	0	0	0	0	0	0	0	0	3
ACTL10__chr20	0	0	0	1	0	0	0	0	0	1	0	0	0	0	0	0	0	0	0	1	0	0	0	0	0	0	0	0	0	0	0	0	0	0	0	0	0	0	0	0	0	0	0	0	0	0	0	0	0
ACTL6A__chr3	10,01	0	1	12,02	8,01	0	1	0	21,05	6	0	0	2	4	1	8,01	0	2	0	6	2	8,01	0	0	11,01	0	1	1	0	0	7,01	0	17,03	2	0	0	0	0	0	0	0	0	0	2	1	8,01	6	0	18,04
ACTN1__chr14	101,23	0	16,03	99,18	83,84	37,16	24,07	0	72,63	64,5	41,2	0	26,08	27,09	3	39,18	1	21,05	0	44,23	65,51	68,56	0	0	63,48	1	18,04	15,03	10,01	33,13	49,29	1	93,04	23,06	0	1	0	0	0	0	3	0	1	29,1	18,04	47,27	14,02	38,17	107,38
ACTN4__chr19	96,11	0	10,01	130,03	76,7	37,16	15,03	1	92,01	49,29	45,24	0	14,02	11,01	0	74,67	0	32,12	0	81,8	67,55	49,29	1	0	88,95	0	12,02	18,04	16,03	35,15	50,3	1	94,06	26,08	2	4	0	1	0	1	0	0	1	24,07	17,03	46,25	19,04	27,09	73,65
ACTR10__chr14	6	0	4	8,01	2	3	2	0	10,01	3	0	0	3	5	0	3	0	2	0	3	4	13,02	0	0	7,01	0	1	1	1	6	6	0	2	4	0	0	0	0	0	0	0	0	0	2	9,01	2	2	9,01	9,01
ACTR1A__chr10	23,06	0	6	25,07	11,01	12,02	7,01	0	33,13	16,03	7,01	1	11,01	10,01	0	22,06	0	13,02	0	19,04	13,02	27,09	0	0	13,02	0	3	4	5	9,01	14,02	0	33,13	9,01	0	0	0	0	0	0	0	0	0	9,01	20,05	10,01	13,02	8,01	21,05
ACTR1B__chr2	8,01	0	0	10,01	7,01	7,01	1	0	1	3	0	1	4	8,01	0	4	0	4	0	1	1	3	0	0	9,01	0	0	1	1	0	3	0	7,01	4	0	0	0	1	0	1	0	0	0	7,01	4	2	1	2	4
ACTR2__chr2	19,04	0	14,02	30,11	33,13	18,04	7,01	0	33,13	29,1	18,04	0	15,03	15,03	0	14,02	0	20,05	0	16,03	17,03	24,07	0	0	33,13	0	4	5	6	3	17,03	0	34,14	8,01	0	0	2	0	0	0	1	0	0	8,01	8,01	7,01	15,03	6	34,14
ACTR3BP5__chr10	0	0	0	0	0	0	0	0	0	0	0	0	0	0	0	0	0	0	0	0	0	0	0	0	0	0	0	0	0	0	0	0	0	0	0	0	0	0	0	0	0	0	0	0	0	0	0	0	0
ACTR3B__chr7	0	0	0	0	0	0	0	0	0	0	1	0	0	0	0	0	0	0	0	0	0	0	0	0	0	0	0	0	0	0	0	0	0	0	0	0	0	0	0	0	0	0	1	0	1	0	0	0	0
ACTR3C__chr7	0	0	0	0	0	0	0	0	0	0	0	0	0	0	0	0	0	0	0	0	0	0	0	0	0	0	0	0	0	0	0	0	0	0	0	0	0	0	0	0	0	0	0	0	0	0	0	0	0
ACTR3__chr2	19,04	0	9,01	34,14	24,07	9,01	1	0	26,08	43,22	15,03	0	8,01	10,01	0	18,04	0	14,02	0	16,03	23,06	23,06	0	0	36,15	0	6	6	3	8,01	21,05	0	34,14	14,02	0	1	0	1	1	0	0	0	0	18,04	7,01	14,02	10,01	10,01	30,11
ACTR5__chr20	0	0	0	0	0	0	0	0	0	0	0	0	0	0	0	0	0	0	0	0	0	0	0	0	0	0	0	0	0	0	0	0	3	0	0	0	0	0	0	0	0	0	0	0	0	0	0	0	0
ACTR6__chr12	1	0	0	1	1	2	1	0	1	1	0	0	1	2	0	0	0	0	0	1	2	4	0	0	2	0	0	0	0	0	0	0	3	1	0	0	0	0	0	0	0	0	1	0	1	1	1	1	1
ACTR8__chr3	1	0	0	1	1	2	0	0	1	1	0	0	0	1	0	0	0	3	0	1	2	1	0	0	0	0	0	0	0	0	1	0	0	0	0	0	0	0	0	0	0	0	0	0	0	1	0	0	0
ACTRT3__chr3	0	0	0	0	0	0	1	0	0	0	0	0	0	0	0	0	0	0	0	0	0	0	0	0	0	0	0	0	0	0	0	0	0	0	0	0	0	0	0	0	1	0	0	1	0	0	0	0	1
ACVR1B__chr12	1	0	0	3	0	0	1	0	2	0	0	0	0	1	0	1	0	0	0	3	0	0	0	0	5	0	1	0	0	0	3	0	0	0	0	0	0	0	0	0	0	0	0	2	2	0	0	3	1
ACVR1C__chr2	0	0	0	0	0	0	0	0	0	0	0	0	0	0	0	0	0	0	0	0	0	0	0	0	0	0	0	0	0	0	0	0	0	0	0	0	0	0	0	0	0	0	0	0	0	0	0	0	0
ACVR1__chr2	3	0	1	1	0	3	3	0	5	1	1	0	0	2	0	4	0	0	0	5	2	8,01	0	0	1	0	2	4	2	2	3	0	4	2	0	0	0	0	0	0	0	0	0	3	1	3	0	1	4
ACVR2A__chr2	0	0	0	1	0	0	0	0	0	0	2	0	0	0	0	0	0	0	0	1	0	1	0	0	0	0	0	0	0	0	0	0	0	0	0	0	0	0	0	0	0	0	0	3	0	0	0	2	2
ACVR2B-AS1__chr3	0	0	0	0	0	0	1	0	0	0	0	0	0	0	0	0	0	0	0	0	0	0	0	0	0	0	0	0	0	0	0	0	0	0	0	0	0	0	0	0	0	0	0	0	0	0	0	0	0
ACVR2B__chr3	0	0	0	3	0	0	0	0	0	1	0	0	1	1	0	1	0	0	0	0	0	0	0	0	0	0	0	0	0	0	0	0	2	0	0	0	0	0	0	0	0	0	0	0	0	0	0	0	0
ACVRL1__chr12	0	0	0	0	0	0	0	0	0	0	0	0	0	0	0	0	0	0	0	0	0	0	0	0	0	0	0	0	0	0	0	0	0	0	0	0	0	0	0	0	0	0	0	0	0	0	0	0	0
ACYP1__chr14	2	0	1	2	0	0	0	0	5	1	0	0	0	0	0	4	0	0	0	0	1	5	0	0	1	0	1	0	1	1	2	0	2	4	0	0	0	0	0	0	0	0	1	2	0	2	1	0	3
ACYP2__chr2	3	0	1	0	2	0	1	0	0	1	2	0	0	1	0	3	0	0	0	1	1	1	0	0	0	0	1	0	0	0	0	0	1	1	0	0	0	0	0	0	0	0	0	2	1	0	0	2	0
ADAL__chr15	0	0	1	2	0	0	0	0	1	0	1	0	0	1	0	0	0	1	0	0	0	0	0	0	0	0	0	1	0	1	1	0	1	0	0	0	0	0	0	0	0	0	0	0	0	0	1	2	0
ADAM10__chr15	1	0	2	0	1	0	0	0	0	0	1	0	0	0	0	2	0	0	0	1	0	2	0	0	2	0	0	1	0	2	1	0	0	0	0	0	0	0	0	0	0	0	0	0	1	0	0	5	0
ADAM11__chr17	0	0	0	0	0	0	0	0	0	0	0	0	0	0	0	0	0	0	0	0	0	0	0	0	0	0	0	0	0	0	0	0	0	0	0	0	0	0	0	0	0	0	0	0	0	0	0	0	0
ADAM12__chr10	1	0	0	4	0	1	0	0	4	2	2	0	2	3	0	0	0	0	0	1	1	4	0	0	4	0	1	0	0	1	2	0	1	2	0	0	0	0	0	0	0	0	0	1	3	2	0	1	0
ADAM15__chr1	0	0	0	0	0	2	0	0	2	1	0	0	1	1	0	3	0	1	0	2	3	2	0	0	4	0	0	0	0	0	1	0	1	0	0	0	0	0	0	0	0	0	0	0	4	3	0	1	1
ADAM17__chr2	1	0	1	0	0	0	1	0	0	0	1	0	0	0	0	0	0	0	0	0	1	1	0	0	2	0	1	1	2	0	0	0	0	0	0	0	0	0	0	0	0	0	0	1	3	2	2	0	1
ADAM19__chr5	1	0	0	10,01	14,02	2	1	0	0	5	0	0	3	2	0	8,01	0	9,01	0	4	2	3	0	0	9,01	0	2	1	1	5	6	0	6	0	0	0	0	0	0	0	0	0	0	2	5	2	2	1	16,03
ADAM1A__chr12	0	0	0	0	0	0	0	0	0	3	0	0	0	1	0	1	0	0	0	0	1	0	0	0	0	0	0	0	0	3	0	0	0	0	0	0	0	0	0	0	0	0	0	0	0	0	0	0	0
ADAM20P1__chr14	0	0	0	0	0	0	0	0	0	0	1	0	0	0	0	0	0	0	0	0	0	0	0	0	0	0	0	0	0	0	0	0	0	0	0	0	0	0	0	0	0	0	0	0	0	0	0	0	0
ADAM20__chr14	0	0	0	0	0	0	0	0	0	0	0	0	0	0	0	0	0	0	0	0	0	0	0	0	0	0	0	0	0	0	0	0	0	0	0	0	0	0	0	0	0	0	0	0	0	0	0	0	0
ADAM21__chr14	0	0	0	0	0	0	0	0	0	0	0	0	0	0	0	0	0	0	0	0	0	0	0	0	0	0	0	0	0	0	0	0	0	0	0	0	0	0	0	0	0	0	0	0	0	0	0	0	0
ADAM22__chr7	0	0	0	1	1	0	0	0	0	0	0	0	0	0	0	0	0	0	0	0	0	1	0	0	1	0	0	0	0	1	0	0	1	0	0	0	0	0	0	1	0	0	0	0	0	0	0	0	1
ADAM23__chr2	2	0	0	0	0	0	0	0	0	0	1	0	0	0	0	0	0	1	0	0	0	1	0	0	1	0	0	0	0	0	1	0	1	1	0	0	0	0	0	0	0	0	0	1	0	0	1	0	1
ADAM28__chr8	0	0	0	0	0	0	0	0	0	0	0	0	0	0	0	0	0	0	0	0	0	0	0	0	0	0	0	0	0	0	0	0	0	0	0	0	0	0	0	0	0	0	0	0	0	0	0	0	0
ADAM33__chr20	0	0	0	0	0	0	0	0	0	0	0	0	0	0	0	0	0	0	0	0	0	0	0	0	0	0	0	0	0	0	0	0	0	0	0	0	0	0	0	0	0	0	0	0	0	0	0	0	0
ADAM8__chr10	0	0	0	0	0	1	0	0	0	3	1	0	0	0	0	0	0	0	0	1	0	0	0	0	0	0	1	0	0	0	0	0	0	0	0	0	0	0	0	0	0	0	0	1	0	1	0	0	0
ADAM9__chr8	17,03	0	9,01	26,08	15,03	25,07	9,01	0	23,06	32,12	11,01	0	5	13,02	0	20,05	0	11,01	0	31,11	17,03	45,24	1	2	19,04	0	4	14,02	6	11,01	24,07	0	28,09	11,01	0	0	2	0	1	1	1	0	0	10,01	31,11	8,01	5	9,01	29,1
ADAMTS10__chr19	0	0	0	1	0	0	2	0	0	2	1	0	1	0	0	0	0	1	0	1	1	0	0	1	0	0	1	0	0	1	1	0	3	0	0	0	0	0	0	0	0	0	0	1	1	0	0	2	0
ADAMTS12__chr5	0	0	0	0	0	0	0	0	0	0	0	0	0	1	0	0	0	0	0	0	0	0	0	0	0	0	0	0	0	1	1	0	0	0	0	0	0	0	0	0	0	0	0	0	1	0	1	1	1
ADAMTS13__chr9	0	0	0	0	0	0	0	0	0	0	0	0	0	0	0	0	0	0	0	0	0	0	0	0	0	0	0	0	0	0	0	0	0	0	0	0	0	0	0	0	0	0	0	0	1	0	0	1	0
ADAMTS14__chr10	0	0	0	0	0	0	0	0	0	0	0	0	0	0	0	0	0	0	0	2	0	0	0	0	0	0	0	0	0	0	0	0	0	0	0	0	0	0	0	0	0	0	0	0	0	0	0	0	0
ADAMTS15__chr11	0	0	4	0	0	0	0	0	1	0	2	0	0	0	0	2	0	2	0	1	0	0	0	0	0	0	2	0	0	0	3	0	0	1	0	0	0	0	0	0	0	0	0	2	1	0	0	0	1
ADAMTS16__chr5	0	0	0	0	0	0	0	0	0	0	0	0	0	0	0	0	0	0	0	0	1	0	0	0	0	0	0	0	0	0	0	0	0	0	0	0	0	0	0	0	0	0	0	0	0	0	0	0	0
ADAMTS17__chr15	0	0	0	0	0	0	0	0	0	0	0	0	0	0	0	0	0	0	0	0	0	0	0	0	0	0	2	0	0	0	0	0	0	0	0	0	0	0	0	0	0	0	0	0	0	0	0	0	0
ADAMTS18__chr16	0	0	0	0	0	0	0	0	0	0	0	0	0	0	0	0	0	0	0	0	0	0	0	0	0	0	0	0	0	0	0	0	0	0	0	0	0	0	0	0	0	0	0	0	0	0	0	0	0
ADAMTS1__chr21	0	0	0	23,06	3	0	0	0	0	1	0	0	3	0	0	1	0	0	0	0	2	0	0	0	0	0	0	0	1	0	2	0	2	0	0	0	0	0	0	0	0	0	1	0	0	0	0	0	0
ADAMTS2__chr5	1	0	0	0	0	0	0	0	0	0	0	0	0	0	0	0	0	0	0	0	0	0	0	0	0	0	0	0	0	0	0	0	0	0	0	0	0	0	0	0	0	0	0	0	0	0	0	0	0
ADAMTS3__chr4	0	1	0	0	0	0	0	0	0	0	0	0	1	0	0	1	0	0	0	0	0	0	0	0	0	0	0	0	0	0	0	0	0	0	0	0	0	0	0	0	0	0	0	1	0	0	0	1	0
ADAMTS4__chr1	0	0	0	0	0	0	0	0	0	0	0	0	0	0	0	0	0	0	0	0	0	0	0	0	0	0	0	0	0	0	0	0	0	0	0	0	0	0	0	0	0	0	0	0	0	0	0	0	0
ADAMTS5__chr21	0	0	0	3	0	0	0	0	0	0	0	0	0	0	0	0	0	0	0	0	0	0	0	0	2	0	0	0	0	0	0	0	0	0	0	0	0	0	0	0	0	0	0	0	1	0	0	0	1
ADAMTS6__chr5	2	0	0	1	3	0	0	0	0	0	3	0	1	1	0	0	0	2	0	1	2	0	0	0	6	0	0	0	0	0	0	0	3	0	0	0	0	0	0	0	0	0	0	1	0	0	0	0	1
ADAMTS7__chr15	1	0	1	0	0	1	2	0	0	1	1	0	0	0	0	4	0	1	0	1	1	5	0	0	2	0	2	1	0	2	0	0	1	4	0	0	0	0	0	0	0	0	0	4	4	0	0	1	2
ADAMTS9__chr3	0	0	0	0	0	0	0	0	0	0	0	0	0	0	0	0	0	0	0	0	0	0	0	0	0	0	0	0	0	0	0	0	0	0	0	0	0	0	0	0	0	0	0	0	0	0	0	0	0
ADAMTSL1__chr9	2	0	2	2	0	2	1	0	3	1	2	0	2	3	0	2	0	3	0	5	3	5	0	0	12,02	0	3	2	1	2	2	0	5	6	0	0	0	0	0	0	0	0	0	0	4	3	1	5	4
ADAMTSL3__chr15	0	0	0	0	0	0	0	0	0	0	0	0	1	2	0	0	0	1	0	3	0	0	0	0	4	1	0	0	0	0	1	0	2	0	0	0	0	0	0	0	0	0	0	0	0	1	0	0	0
ADAMTSL4__chr1	0	0	0	0	0	0	0	0	0	1	0	0	0	0	0	0	0	0	0	0	0	0	0	0	1	0	0	0	0	0	1	0	0	0	0	0	0	0	0	0	0	0	0	0	0	0	0	0	0
ADAMTSL5__chr19	2	0	0	0	0	0	0	0	0	1	0	0	0	0	0	0	0	0	0	0	0	0	0	0	0	0	0	0	0	0	0	0	0	0	0	0	0	0	0	0	0	0	0	0	0	0	0	1	0
ADARB1__chr21	0	0	0	1	0	0	0	0	0	0	0	0	0	0	0	0	0	0	0	0	1	0	0	0	0	0	0	0	0	1	0	0	1	0	0	0	0	0	0	0	0	0	0	0	2	1	0	0	0
ADARB2__chr10	0	0	0	0	0	0	0	0	0	0	0	0	0	0	0	0	0	0	0	0	0	0	0	0	0	0	0	0	0	0	0	0	0	0	0	0	0	0	0	0	0	0	0	0	0	0	0	0	0
ADAR__chr1	4	0	12,02	15,03	11,01	14,02	6	1	18,04	11,01	8,01	1	3	9,01	0	14,02	0	9,01	0	7,01	8,01	17,03	0	0	11,01	0	6	4	2	14,02	9,01	2	20,05	9,01	0	0	0	0	1	0	1	0	0	9,01	10,01	2	7,01	12,02	9,01
ADAT1__chr16	3	0	0	0	2	1	0	0	1	1	0	0	0	0	0	0	0	1	0	0	0	1	0	0	0	0	0	1	0	0	0	0	0	2	0	0	0	0	0	0	0	0	0	1	0	0	1	0	1
ADAT2__chr6	0	0	1	1	0	0	0	0	0	1	0	0	1	0	0	2	0	0	0	0	0	0	0	0	0	0	0	0	0	0	1	0	1	0	0	0	0	0	0	0	0	0	0	0	0	0	1	0	0
ADAT3__chr19	0	0	0	0	1	0	1	0	0	1	1	0	0	0	0	1	0	1	0	0	0	0	0	0	1	0	0	0	0	1	2	0	0	0	0	0	0	0	0	0	0	0	0	0	0	1	1	0	0
ADA__chr20	0	0	0	0	0	0	0	0	2	0	0	0	0	0	0	2	0	0	0	1	0	0	0	0	0	0	0	0	0	0	0	0	1	0	0	0	0	0	0	0	0	0	0	1	0	0	0	0	0
ADCK1__chr14	2	0	0	0	0	1	0	0	0	0	0	0	0	1	0	1	0	1	0	1	1	0	0	0	0	0	0	0	0	0	1	0	0	0	0	0	0	0	0	0	0	0	0	0	0	0	0	0	0
ADCK2__chr7	0	0	0	1	0	0	0	0	2	1	0	0	0	0	0	0	0	1	0	0	0	1	0	0	0	0	1	0	0	0	0	0	0	0	0	0	0	0	0	0	0	0	0	0	0	0	0	0	0
ADCK3__chr1	1	0	0	2	0	0	0	0	3	0	0	0	1	2	0	1	0	0	0	1	0	1	0	0	2	0	0	0	0	2	1	0	0	0	0	0	0	0	0	0	0	0	0	2	2	2	0	0	0
ADCK4__chr19	0	0	5	0	0	0	1	0	1	0	0	0	0	1	0	0	0	0	0	0	0	0	0	0	3	0	1	0	0	0	1	0	0	0	0	0	0	0	0	0	0	0	0	0	0	0	0	2	1
ADCK5__chr8	0	0	0	0	1	0	2	0	0	0	0	0	0	1	0	1	0	0	0	1	0	0	0	0	1	0	0	0	0	0	1	0	1	0	0	0	0	0	0	0	0	0	0	0	0	0	1	1	1
ADCY10P1__chr6	0	0	0	0	0	0	0	0	0	0	0	0	0	0	0	1	0	0	0	0	0	0	0	0	0	0	0	0	0	0	0	0	0	0	0	0	0	0	0	0	0	0	0	0	0	0	0	0	0
ADCY10__chr1	0	0	0	0	0	0	0	0	0	0	0	0	0	0	0	0	0	0	0	0	0	0	0	0	0	0	0	0	0	0	0	0	0	0	0	0	0	0	0	0	0	0	0	0	0	0	0	0	0
ADCY2__chr5	0	0	0	0	0	0	0	0	0	0	0	0	0	0	0	0	0	0	0	0	0	0	0	0	0	0	0	0	0	0	0	0	0	0	0	0	0	0	0	0	0	0	0	0	0	0	0	0	0
ADCY3__chr2	0	0	0	4	1	1	0	0	3	0	0	0	0	0	0	2	0	0	0	2	0	0	0	0	0	0	0	0	0	0	0	0	0	0	0	0	0	0	0	0	0	0	0	0	0	0	0	0	0
ADCY5__chr3	0	0	0	0	0	0	0	0	0	0	0	0	0	0	0	0	0	0	0	0	0	0	0	0	0	0	0	0	0	0	0	0	0	0	0	0	0	0	0	0	0	0	0	0	0	0	0	0	0
ADCY6__chr12	0	0	1	3	1	0	2	0	1	0	0	0	1	3	0	0	0	1	0	2	3	0	0	0	2	0	0	0	0	1	3	0	1	1	0	0	0	0	0	0	0	0	0	1	2	1	0	3	1
ADCY7__chr16	0	0	0	0	0	1	0	0	0	0	0	0	0	0	0	0	0	0	0	0	0	0	0	0	0	0	0	0	0	1	0	0	0	0	0	0	0	0	0	0	0	0	0	0	0	0	0	0	0
ADCY9__chr16	1	0	0	1	0	0	0	0	0	0	0	0	1	0	0	0	0	0	0	0	0	0	0	0	1	0	2	0	0	0	1	0	1	0	0	0	0	0	0	0	0	0	0	1	0	0	0	0	0
ADCYAP1R1__chr7	0	0	0	0	0	0	0	0	0	0	0	0	0	0	0	0	0	0	0	0	0	0	0	0	0	0	0	1	0	0	0	0	0	0	0	0	0	0	0	0	0	0	0	0	0	0	0	0	0
ADC__chr1	0	0	0	0	0	1	0	0	0	0	0	0	0	0	0	0	0	0	0	4	0	0	0	0	0	0	0	0	0	3	0	0	0	0	0	0	0	0	0	0	0	0	0	2	2	0	0	0	1
ADD1__chr4	18,04	1	8,01	25,07	17,03	10,01	5	0	16,03	18,04	7,01	0	5	8,01	0	7,01	0	15,03	0	19,04	9,01	23,06	0	0	26,08	0	2	6	8,01	9,01	15,03	0	18,04	6	0	1	0	0	0	0	0	0	0	20,05	12,02	4	7,01	11,01	17,03
ADD2__chr2	1	0	0	1	3	0	0	0	3	0	1	0	1	0	0	0	0	5	0	1	1	1	0	0	2	0	0	1	0	0	2	0	8,01	1	0	0	0	0	0	0	0	0	0	0	1	0	0	0	5
ADD3__chr10	9,01	0	0	11,01	8,01	1	3	0	8,01	10,01	0	0	6	5	0	4	0	0	0	25,07	3	17,03	0	0	8,01	0	5	2	0	15,03	2	0	3	1	0	0	0	0	1	0	0	0	0	10,01	6	2	3	4	8,01
ADH4__chr4	0	0	0	0	0	0	0	0	0	0	0	0	0	0	0	0	0	0	0	0	0	0	0	0	0	0	0	0	0	0	0	0	0	0	0	0	0	0	0	0	0	0	0	0	0	0	0	0	0
ADH5__chr4	15,03	0	10,01	28,09	17,03	19,04	7,01	0	31,11	19,04	6	0	19,04	13,02	1	16,03	0	15,03	0	15,03	15,03	31,11	1	0	39,18	0	2	5	5	24,07	7,01	1	36,15	11,01	0	0	0	0	0	2	0	0	4	18,04	23,06	7,01	10,01	14,02	33,13
ADHFE1__chr8	2	0	1	0	0	0	0	0	0	0	0	0	0	0	0	0	0	0	0	0	0	0	0	0	0	0	1	0	0	1	0	0	0	0	0	0	0	0	0	0	0	0	0	0	0	0	0	0	0
ADI1__chr2	11,01	0	6	14,02	4	5	3	0	10,01	5	5	0	1	7,01	0	6	0	10,01	0	11,01	13,02	13,02	0	0	9,01	0	2	4	2	1	4	0	7,01	3	1	0	0	0	0	0	1	1	0	9,01	7,01	3	3	12,02	6
ADIPOQ-AS1__chr3	0	0	0	0	0	0	0	0	0	0	0	0	0	0	0	0	0	0	0	0	0	0	0	0	0	0	0	0	1	0	0	0	0	0	0	0	0	0	0	0	0	0	0	0	0	0	0	0	0
ADIPOQ__chr3	0	0	0	0	0	0	0	0	0	0	0	0	0	0	0	0	0	0	0	0	0	0	0	0	0	0	0	0	0	0	0	0	0	0	0	0	0	0	0	0	0	0	0	0	0	0	0	0	0
ADIPOR1__chr1	9,01	0	1	6	7,01	1	6	0	8,01	14,02	1	0	1	9,01	1	8,01	0	5	0	7,01	7,01	8,01	0	1	9,01	0	1	5	0	4	9,01	0	5	3	0	0	0	0	0	0	0	0	1	7,01	7,01	5	2	4	14,02
ADIPOR2__chr12	4	0	3	2	1	3	1	0	4	7,01	2	0	1	0	0	4	0	1	0	12,02	5	4	0	0	6	0	1	1	3	2	1	0	6	4	0	0	0	0	0	0	0	0	0	3	4	1	3	1	4
ADK__chr10	9,01	0	5	14,02	6	7,01	1	0	21,05	15,03	11,01	0	3	3	0	5	0	8,01	0	8,01	11,01	7,01	0	0	17,03	0	1	3	2	2	12,02	0	16,03	6	0	0	0	1	1	2	0	0	1	2	4	8,01	4	0	15,03
ADM2__chr22	0	0	0	0	0	0	0	0	0	0	0	0	0	0	0	0	0	0	0	0	0	0	0	0	0	0	0	0	0	0	0	0	0	0	0	0	0	0	0	0	0	0	0	0	0	0	0	0	0
ADM5__chr19	0	0	0	0	0	0	3	0	1	0	0	0	0	0	0	1	0	1	0	0	0	1	0	0	0	0	1	0	0	0	0	0	2	0	0	0	0	0	0	0	0	0	0	0	0	0	0	0	0
ADM__chr11	5	0	4	1	3	1	2	0	4	0	0	0	0	0	0	2	0	1	0	2	5	0	0	0	0	0	1	0	0	0	1	0	17,03	3	0	0	0	0	0	0	0	0	0	3	2	1	0	67,55	0
ADNP2__chr18	2	0	4	0	0	0	0	0	1	1	0	1	1	0	0	1	0	1	0	0	1	1	0	0	2	0	2	0	1	1	0	0	1	0	0	0	0	0	0	0	0	0	0	1	0	0	0	1	0
ADNP__chr20	0	0	3	5	2	1	0	0	1	2	3	0	2	0	0	2	0	2	0	2	1	3	0	0	3	0	0	2	1	4	3	0	1	0	0	0	0	0	0	0	0	1	0	0	5	1	0	1	1
ADORA1__chr1	0	0	0	0	0	0	0	0	2	1	0	0	0	0	0	0	0	0	0	0	2	0	0	0	0	0	0	0	0	0	0	0	0	0	0	0	0	0	0	0	0	0	0	0	0	0	0	0	0
ADORA2A__chr22	0	0	0	0	0	0	0	0	0	0	0	0	0	0	0	0	0	0	0	0	0	0	0	0	0	0	0	0	0	0	0	0	0	0	0	0	0	0	0	0	0	0	0	0	0	0	0	0	0
ADORA2B__chr17	12,02	0	1	7,01	1	3	2	0	1	3	2	0	1	5	0	2	0	2	0	4	3	3	0	0	9,01	0	1	2	0	0	2	0	4	1	0	0	0	0	0	1	0	0	0	0	0	2	2	0	9,01
ADORA3__chr1	0	0	0	0	0	0	0	0	0	0	0	0	0	0	0	0	0	0	0	0	0	0	0	0	0	0	0	0	0	0	0	0	0	0	0	0	0	0	0	0	0	0	0	0	0	0	0	0	0
ADO__chr10	2	0	1	6	7,01	5	6	1	4	6	0	0	2	3	0	4	0	5	0	7,01	2	5	0	0	6	0	0	2	2	2	4	0	5	0	0	0	0	0	0	1	0	0	1	4	2	2	3	3	6
ADPGK-AS1__chr15	0	0	0	0	0	0	0	0	0	0	0	0	0	0	0	0	0	0	0	0	0	0	0	0	0	0	0	0	0	0	0	0	0	0	0	0	0	0	0	0	0	0	0	0	0	0	0	0	0
ADPGK__chr15	4	0	0	3	1	0	0	0	5	2	0	0	2	6	0	0	0	1	0	2	2	3	1	0	3	0	0	0	2	3	3	0	1	1	0	0	0	0	0	0	0	0	0	0	0	3	0	0	4
ADPRHL1__chr13	0	0	0	1	0	0	0	0	0	0	0	0	0	0	0	0	0	0	0	0	0	0	0	0	1	0	0	0	0	0	1	0	0	0	0	0	0	0	0	0	0	0	0	0	0	0	0	0	0
ADPRHL2__chr1	1	0	3	0	1	1	0	0	3	5	2	0	2	2	0	3	0	0	0	1	0	1	0	0	3	0	1	0	0	2	3	0	2	1	0	0	0	0	0	0	0	0	0	0	0	0	2	1	2
ADPRH__chr3	0	0	0	0	0	0	0	0	2	0	0	0	0	0	0	0	0	0	0	0	0	0	0	0	0	0	0	0	0	0	0	0	0	0	0	0	0	0	0	0	0	0	0	0	0	0	0	0	0
ADPRM__chr17	0	0	0	1	0	1	1	0	0	2	0	0	1	0	0	2	0	2	0	0	0	3	0	0	1	0	2	0	0	0	0	0	2	0	0	0	0	0	0	0	0	0	0	0	0	0	0	2	1
ADRA1B__chr5	0	0	0	0	0	0	0	0	0	0	0	0	0	0	0	0	0	0	0	0	0	0	0	0	0	0	0	0	0	0	0	0	0	0	0	0	0	0	0	0	0	0	0	0	0	0	0	0	0
ADRA2C__chr4	0	0	0	0	0	0	0	0	0	0	0	0	0	0	0	0	0	0	0	0	0	0	0	0	0	0	0	0	0	0	0	0	0	0	0	0	0	0	0	0	0	0	0	0	0	0	0	0	0
ADRB1__chr10	0	0	0	0	0	0	0	0	0	0	0	0	0	0	0	0	0	0	0	0	0	0	0	0	0	0	0	0	0	0	0	0	0	0	0	0	0	0	0	0	0	0	0	0	0	0	0	0	0
ADRB2__chr5	3	0	0	1	1	0	0	0	3	6	4	0	0	0	0	0	0	1	0	0	0	0	0	0	5	0	0	1	0	0	0	0	4	0	0	0	0	0	0	0	0	0	0	0	0	0	0	0	2
ADRB3__chr8	0	0	0	0	0	0	0	0	0	0	0	0	0	0	0	0	0	0	0	0	0	0	0	0	0	0	0	0	0	0	0	0	0	0	0	0	0	0	0	0	0	0	0	0	0	0	0	0	0
ADRBK1__chr11	2	0	1	3	5	1	1	0	7,01	1	4	0	1	6	0	0	0	1	0	1	1	6	0	0	6	0	0	1	1	0	6	0	4	0	0	0	0	0	0	0	0	0	0	1	2	0	0	4	1
ADRBK2__chr22	0	0	0	0	0	0	0	0	0	0	0	0	0	0	0	0	0	0	0	0	0	0	0	0	0	0	0	0	0	0	0	0	0	0	0	0	0	0	0	0	0	0	0	0	0	0	0	0	0
ADRM1__chr20	4	0	0	2	2	3	0	0	1	4	3	0	4	0	0	3	0	5	0	5	3	7,01	0	0	3	0	1	2	0	1	9,01	0	8,01	2	0	0	0	0	0	0	0	0	1	3	0	3	3	3	2
ADSL__chr22	10,01	0	7,01	4	10,01	15,03	5	0	8,01	17,03	5	0	8,01	5	0	1	0	10,01	1	3	11,01	7,01	0	1	8,01	0	4	4	0	2	4	0	14,02	5	0	0	0	0	0	0	0	0	0	4	3	8,01	6	2	8,01
ADSSL1__chr14	0	0	0	0	0	0	0	0	0	0	0	0	0	0	0	0	0	0	0	0	0	0	0	0	0	0	0	0	0	0	0	0	0	0	0	0	0	0	0	1	0	0	0	0	1	0	0	0	0
ADSS__chr1	5	0	5	7,01	7,01	10,01	3	0	6	5	3	0	2	4	0	6	0	4	0	5	2	8,01	0	0	12,02	0	1	3	0	2	2	0	6	4	0	0	0	0	0	0	0	0	0	5	3	4	5	4	9,01
ADTRP__chr6	2	0	0	3	1	1	0	0	0	1	2	0	1	0	0	0	0	0	0	0	0	0	0	0	2	0	0	0	0	0	0	0	0	0	0	0	0	0	0	0	0	0	0	0	1	2	0	0	2
AEBP1__chr7	0	0	0	0	0	0	0	0	0	0	0	0	0	0	0	0	0	0	0	0	0	0	0	0	0	0	0	0	0	0	0	0	0	0	0	0	0	0	0	0	0	0	0	0	0	0	0	0	0
AEBP2__chr12	1	0	1	10,01	2	4	1	0	4	2	2	0	2	4	0	3	0	4	0	3	3	5	0	0	2	0	1	0	0	1	4	0	4	2	0	0	0	0	0	0	0	0	0	2	2	2	2	2	1
AEN__chr15	1	0	0	0	2	1	1	0	1	6	1	0	1	1	0	1	0	0	0	2	0	4	0	0	2	0	1	1	0	1	2	0	5	2	0	0	0	0	0	0	0	0	0	2	2	0	0	0	1
AES__chr19	23,06	0	18,04	28,09	30,11	29,1	6	0	42,21	27,09	19,04	1	17,03	25,07	1	26,08	0	22,06	0	35,15	38,17	40,19	0	0	23,06	0	7,01	6	9,01	21,05	38,17	1	31,11	15,03	0	2	0	0	0	1	0	0	1	32,12	21,05	18,04	15,03	19,04	38,17
AFAP1-AS1__chr4	0	0	1	0	0	0	0	0	0	0	0	0	0	0	0	0	0	0	0	0	0	0	0	0	0	0	0	0	0	0	1	0	0	0	0	0	0	0	0	0	0	0	0	0	0	0	0	0	0
AFAP1L1__chr5	1	0	0	3	2	0	0	0	0	1	0	0	0	0	0	1	0	3	0	3	0	1	0	0	0	0	0	0	0	0	1	0	1	0	0	0	0	0	0	0	0	0	0	0	0	0	0	0	1
AFAP1L2__chr10	0	0	0	0	0	0	0	0	0	0	0	0	0	0	0	0	0	0	0	0	0	0	0	0	0	0	0	0	0	0	0	0	1	0	0	0	0	0	0	0	0	0	0	0	0	0	0	0	0
AFAP1__chr4	8,01	0	5	11,01	20,05	9,01	1	0	7,01	8,01	6	0	2	18,04	0	7,01	1	9,01	0	10,01	8,01	12,02	0	0	16,03	0	2	6	2	16,03	2	0	11,01	14,02	0	0	0	0	0	0	0	0	0	7,01	13,02	1	4	8,01	19,04
AFF1__chr4	5	0	2	2	1	2	1	0	8,01	0	2	0	2	2	0	0	0	1	0	1	1	5	0	0	7,01	0	5	0	1	2	2	0	6	3	0	1	0	0	0	0	0	0	1	1	6	2	4	1	4
AFF2__chrX	0	0	0	0	0	0	0	0	0	0	0	0	0	0	0	0	0	0	0	0	0	0	0	0	0	0	0	0	0	0	0	0	0	0	0	0	0	0	0	0	0	0	0	0	0	0	0	0	0
AFF3__chr2	7,01	0	1	1	0	3	0	0	5	1	2	0	1	2	0	0	0	8,01	0	8,01	1	4	0	0	2	0	1	0	1	1	2	0	0	4	0	0	0	0	0	0	1	0	0	3	1	2	0	0	0
AFF4__chr5	3	0	4	8,01	4	1	4	0	5	6	3	0	2	11,01	1	6	0	6	0	7,01	3	4	0	0	5	1	1	2	0	3	4	0	6	5	0	1	1	0	0	0	0	0	0	2	7,01	4	2	6	2
AFG3L1P__chr16	2	0	2	2	0	2	0	0	1	1	0	0	0	0	0	0	0	1	0	0	0	4	0	0	0	0	0	1	0	0	1	0	1	2	0	0	0	0	0	0	0	0	0	0	0	1	2	0	1
AFG3L2__chr18	11,01	0	2	11,01	5	6	1	0	3	3	3	0	3	1	0	2	0	0	0	5	5	1	0	0	4	0	3	3	2	0	3	0	11,01	6	0	0	0	0	0	0	0	0	2	4	3	1	3	2	7,01
AFMID__chr17	0	0	0	1	1	0	0	0	1	0	0	0	0	0	0	1	0	2	0	0	0	0	0	0	0	0	0	0	0	0	2	0	2	0	0	0	0	0	0	0	0	0	0	0	0	1	0	0	0
AFP__chr4	0	0	0	1	2	0	0	0	0	0	0	0	0	0	0	0	0	0	0	0	1	0	0	0	0	0	0	0	0	0	0	0	0	0	0	0	0	0	0	0	0	0	0	0	0	0	0	0	1
AFTPH__chr2	6	0	2	2	0	1	1	0	2	0	1	0	2	3	0	0	0	1	0	3	0	4	0	0	2	0	0	0	3	3	3	0	1	1	0	1	0	0	0	0	0	0	0	0	1	1	2	1	0
AGAP1__chr2	0	0	0	1	0	0	0	0	1	0	0	0	2	0	0	0	0	1	0	6	1	2	0	0	5	0	0	0	0	1	0	0	0	3	0	0	0	0	0	0	0	0	0	1	1	0	0	0	1
AGAP2__chr12	0	0	0	0	0	0	0	0	0	0	0	0	0	0	0	0	0	0	0	0	0	0	0	0	0	0	0	0	0	0	0	0	0	0	0	0	0	0	0	0	0	0	0	0	0	0	0	0	0
AGAP3__chr7	4	0	3	5	0	0	0	0	4	3	0	0	2	0	0	1	0	2	0	10,01	1	1	0	0	5	0	0	0	1	2	5	0	1	1	0	0	0	0	0	0	0	0	1	3	0	0	1	2	2
AGAP5__chr10	0	0	0	0	0	0	0	0	0	0	0	0	0	0	0	0	0	0	0	0	0	0	0	0	0	0	0	0	0	0	0	0	0	0	0	0	0	0	0	0	0	0	0	0	0	0	0	0	0
AGAP6__chr10	0	0	0	0	0	0	0	0	0	0	0	0	0	0	0	0	0	0	0	0	0	1	0	0	0	0	0	0	0	0	0	0	0	0	0	0	0	0	0	0	0	0	0	0	0	0	0	1	0
AGAP7__chr10	0	0	0	0	0	0	0	0	0	0	0	0	0	0	0	0	0	0	0	0	0	0	0	0	0	0	0	0	0	0	0	0	0	0	0	0	0	0	0	0	0	0	0	0	0	0	0	0	0
AGAP8__chr10	0	0	0	1	0	0	0	0	0	0	0	0	0	0	0	0	0	0	0	0	0	0	0	0	0	0	0	0	0	0	0	0	0	0	0	0	0	0	0	0	0	0	0	0	0	0	0	0	0
AGA__chr4	1	0	1	1	0	2	0	0	3	0	1	0	1	1	0	0	0	0	0	2	0	1	0	0	0	0	0	1	0	0	0	0	0	0	0	0	0	0	0	0	0	0	0	1	4	1	0	0	1
AGBL2__chr11	2	0	0	0	0	0	0	0	0	0	0	0	0	0	0	1	0	0	0	0	0	0	0	0	0	0	0	0	0	0	0	0	0	0	0	0	0	0	0	0	0	0	0	0	0	0	0	0	0
AGBL3__chr7	0	0	0	0	0	0	0	0	0	0	0	0	0	0	0	0	0	0	0	0	0	0	0	0	0	0	0	0	0	0	0	0	0	0	0	0	0	0	0	0	0	0	0	0	0	0	0	0	0
AGBL5__chr2	0	0	0	0	1	0	1	0	2	3	1	0	0	2	0	2	0	2	0	2	0	1	0	0	0	0	0	0	0	1	3	0	0	4	0	0	0	0	0	0	0	0	0	1	1	0	0	1	0
AGER__chr6	0	0	0	2	0	0	0	0	0	1	1	0	0	0	0	0	0	0	0	0	0	3	0	0	0	0	0	0	0	0	0	0	1	0	0	0	0	0	0	0	0	0	1	0	1	0	0	0	0
AGFG1__chr2	9,01	0	1	17,03	5	6	0	0	12,02	3	4	0	0	5	0	3	0	2	0	3	3	7,01	0	0	3	0	3	1	1	2	2	0	8,01	2	0	0	0	0	0	0	0	0	1	1	5	3	3	1	4
AGFG2__chr7	1	0	0	0	0	0	0	0	0	0	0	0	0	0	0	0	0	0	0	0	0	0	0	0	0	0	0	0	0	0	0	0	0	1	0	0	0	0	0	0	0	0	0	0	0	0	0	0	0
AGGF1__chr5	0	0	4	5	3	4	0	0	5	1	3	0	1	2	0	0	0	5	0	2	3	4	0	0	3	0	1	1	0	0	6	0	2	0	0	0	0	0	0	0	0	0	1	1	3	2	0	3	8,01
AGK__chr7	3	0	3	1	2	0	1	0	4	2	1	0	2	0	0	0	0	1	0	0	4	1	0	0	4	0	0	1	0	1	3	0	9,01	0	0	0	0	0	0	0	0	0	0	1	2	0	0	1	4
AGL__chr1	1	0	0	0	0	0	0	0	1	3	0	0	1	0	0	1	0	0	0	3	0	1	0	0	2	0	1	0	0	4	4	0	1	0	0	0	0	0	0	0	0	0	0	1	3	0	0	4	1
AGMAT__chr1	0	0	0	0	0	0	0	0	0	0	1	0	1	0	0	0	0	0	0	0	0	0	0	0	0	0	0	0	0	0	0	0	0	1	0	0	0	0	0	0	0	0	0	0	0	1	0	0	0
AGMO__chr7	0	0	0	0	0	0	0	0	0	0	0	0	0	0	0	0	0	0	0	0	0	0	0	0	0	0	0	0	0	0	0	0	0	0	0	0	0	0	0	0	0	0	0	0	0	0	0	0	0
AGPAT1__chr6	2	0	1	1	2	3	3	0	5	1	0	0	0	2	0	2	0	3	0	1	0	3	0	0	1	0	0	0	0	2	3	0	5	0	0	0	0	0	0	1	0	0	0	1	2	2	2	3	4
AGPAT2__chr9	1	0	1	3	0	1	0	0	0	0	0	0	1	2	0	2	0	1	0	3	2	2	0	0	0	0	0	1	0	1	1	0	3	0	0	0	0	0	0	0	0	0	0	0	2	0	0	1	0
AGPAT3__chr21	2	0	2	16,03	4	5	0	0	14,02	9,01	1	1	10,01	7,01	0	5	0	6	0	5	11,01	9,01	0	0	2	0	0	0	1	3	2	0	7,01	6	0	0	0	0	0	0	0	0	1	2	7,01	1	0	4	0
AGPAT4-IT1__chr6	0	0	1	0	0	0	0	0	1	0	0	0	0	0	0	0	0	0	0	0	0	0	0	0	0	0	0	0	0	0	0	0	0	0	0	0	0	0	0	0	0	0	0	1	0	0	0	2	2
AGPAT4__chr6	2	0	1	0	1	1	0	0	1	0	1	0	2	0	0	1	0	2	0	1	0	0	0	0	1	0	0	0	0	2	0	0	2	0	0	0	0	0	0	0	1	0	0	1	3	4	0	0	1
AGPAT5__chr8	5	0	3	20,05	2	3	4	0	3	4	1	0	3	2	0	4	0	6	0	6	9,01	7,01	0	0	9,01	0	0	2	1	1	6	0	8,01	4	0	0	0	0	0	0	0	1	0	1	7,01	4	2	0	8,01
AGPAT6__chr8	1	0	0	3	2	2	1	0	6	6	4	0	2	5	0	4	0	4	0	6	5	2	0	0	0	0	1	2	0	1	0	0	4	1	0	0	0	0	0	1	0	0	0	1	1	1	1	1	3
AGPAT9__chr4	1	0	0	4	1	1	0	0	0	6	0	0	1	1	0	2	0	1	0	3	4	1	0	0	2	0	3	0	0	0	3	0	3	1	0	0	0	0	0	0	0	0	0	2	0	0	3	0	1
AGPHD1__chr15	0	0	0	1	0	0	0	0	0	0	0	0	0	0	0	0	0	0	0	0	0	0	0	0	0	0	1	0	0	0	0	0	0	0	0	0	0	0	0	0	0	0	0	0	0	0	0	0	0
AGPS__chr2	5	0	2	8,01	6	3	0	0	3	5	0	0	1	3	0	7,01	0	3	0	3	3	5	0	0	7,01	0	1	3	0	2	3	0	6	0	0	0	0	0	0	0	0	0	0	2	6	1	1	2	5
AGRN__chr1	7,01	0	8,01	7,01	8,01	14,02	4	0	9,01	2	9,01	1	7,01	7,01	0	7,01	0	3	0	8,01	7,01	14,02	0	0	10,01	0	7,01	1	1	12,02	3	0	13,02	10,01	0	0	0	0	1	0	0	0	0	13,02	17,03	7,01	3	13,02	7,01
AGTPBP1__chr9	0	0	0	0	0	0	0	0	2	1	0	0	0	0	0	0	0	0	0	2	1	1	0	0	3	0	0	0	0	0	0	0	0	0	0	0	0	1	0	0	0	0	0	0	1	1	1	2	2
AGTR1__chr3	0	0	0	0	0	0	0	0	0	0	0	0	0	0	0	0	0	0	0	0	1	0	0	0	0	0	0	0	0	0	0	0	0	0	0	0	0	0	0	0	0	0	0	0	2	0	0	0	0
AGTRAP__chr1	1	0	0	5	0	2	1	0	13,02	2	0	0	1	0	0	6	0	3	0	3	2	8,01	0	0	2	0	2	1	1	0	7,01	0	5	1	0	0	0	0	0	0	0	0	0	1	2	0	0	0	1
AGXT2L2__chr5	0	0	1	1	0	0	1	0	0	2	0	0	0	0	0	0	0	0	0	0	0	0	0	0	2	0	0	0	0	1	1	0	0	0	0	0	0	0	0	0	0	0	0	0	1	0	0	0	0
AHCTF1__chr1	7,01	0	1	5	8,01	9,01	3	0	4	4	2	0	2	5	0	3	0	4	0	5	5	6	0	0	11,01	0	1	2	2	0	3	0	4	2	0	0	0	0	0	0	0	0	0	1	6	5	6	0	4
AHCYL1__chr1	14,02	0	2	7,01	11,01	3	3	0	14,02	13,02	4	0	3	5	0	4	0	4	0	13,02	5	17,03	0	1	11,01	0	10,01	3	2	9,01	1	0	12,02	4	1	0	0	0	0	0	0	0	0	6	15,03	4	2	7,01	9,01
AHCYL2__chr7	1	0	4	2	0	1	0	0	0	0	0	0	1	3	0	0	0	0	0	1	1	0	0	0	1	0	0	0	0	1	1	0	0	0	0	0	0	0	0	0	0	0	0	3	0	0	0	0	2
AHCY__chr20	5	0	4	9,01	2	1	3	0	11,01	7,01	2	0	2	1	0	7,01	0	5	1	5	6	10,01	0	0	7,01	0	2	1	4	6	4	0	5	4	1	0	0	0	0	0	0	0	0	2	2	7,01	3	2	6
AHDC1__chr1	3	0	4	3	0	2	2	0	3	2	0	0	1	2	0	0	0	0	0	4	1	0	0	0	1	0	0	0	1	1	1	0	0	3	0	0	0	0	0	0	0	0	0	0	2	0	0	2	0
AHI1__chr6	5	0	3	5	1	4	2	0	0	0	0	0	0	3	0	1	0	0	0	2	6	4	0	0	7,01	0	0	0	1	2	4	0	4	0	0	0	0	0	0	0	0	0	0	3	3	0	5	3	4
AHNAK2__chr14	4	0	10,01	11,01	3	8,01	1	0	17,03	11,01	5	0	11,01	6	0	6	0	11,01	0	13,02	6	15,03	0	0	9,01	0	2	1	2	8,01	3	0	26,08	2	0	0	0	0	0	0	0	0	0	2	17,03	1	1	6	8,01
AHNAK__chr11	28,09	1	10,01	43,22	39,18	33,13	13,02	0	45,24	47,27	25,07	0	20,05	18,04	0	31,11	0	14,02	0	39,18	30,11	33,13	0	0	32,12	0	8,01	13,02	13,02	9,01	10,01	0	71,61	12,02	0	0	0	0	0	0	0	0	1	13,02	24,07	11,01	12,02	16,03	28,09
AHRR__chr5	2	0	1	1	1	1	0	0	0	1	0	0	0	2	0	2	0	0	0	2	0	1	0	0	0	0	2	0	0	0	0	0	0	0	0	0	0	0	0	0	0	0	0	1	3	1	0	1	0
AHR__chr7	2	0	10,01	1	2	9,01	3	0	10,01	2	4	0	8,01	5	0	7,01	0	1	0	19,04	3	20,05	0	0	3	0	4	0	1	2	12,02	0	9,01	4	1	0	0	0	0	0	0	0	0	10,01	6	7,01	3	6	5
AHSA1__chr14	6	0	2	8,01	4	4	0	0	10,01	8,01	2	0	5	3	0	7,01	0	6	0	7,01	5	10,01	0	0	5	0	1	4	0	3	5	0	1	4	0	0	0	0	0	0	0	0	1	1	3	5	2	8,01	4
AHSA2__chr2	0	0	0	1	0	3	1	0	0	1	0	0	1	1	0	1	0	1	0	6	2	3	0	0	2	0	1	1	1	2	0	0	3	0	0	0	0	0	0	0	0	0	0	1	2	1	0	6	0
AICDA__chr12	0	0	0	0	0	0	0	0	0	0	0	0	0	0	0	0	0	0	0	0	0	0	0	0	0	0	0	0	0	0	0	0	0	0	0	0	0	0	0	0	0	0	0	0	0	0	0	0	0
AIDA__chr1	18,04	0	4	22,06	11,01	8,01	8,01	0	26,08	13,02	5	0	4	13,02	0	8,01	0	10,01	0	27,09	12,02	20,05	0	0	28,09	0	3	8,01	3	6	28,09	0	25,07	3	0	0	0	0	0	0	0	0	0	4	1	3	9,01	5	11,01
AIF1L__chr9	0	0	0	0	0	0	0	0	0	0	0	0	0	0	0	0	0	0	0	0	0	0	0	0	0	0	0	0	0	0	0	0	0	0	0	0	0	0	0	0	0	0	0	0	0	0	0	0	0
AIFM1__chrX	1	0	1	3	3	1	0	0	1	1	1	0	1	0	0	2	0	3	0	1	0	1	0	0	1	0	0	0	0	0	3	0	3	0	0	0	0	0	0	0	0	0	0	2	0	1	0	2	2
AIFM2__chr10	1	0	0	1	1	1	0	0	0	2	1	0	1	0	0	2	0	0	0	2	1	5	0	0	2	0	0	1	0	2	5	0	2	0	0	0	0	0	0	0	0	0	0	4	0	1	0	0	3
AIG1__chr6	3	0	4	5	2	1	4	0	5	1	1	0	1	4	0	1	0	2	0	5	3	3	0	0	0	0	3	1	0	0	2	0	2	1	0	0	0	0	0	0	0	0	0	4	2	1	0	2	1
AIM1L__chr1	0	0	0	0	0	0	0	0	0	0	0	0	0	0	0	0	0	0	0	0	0	0	0	0	0	0	0	0	0	0	0	0	0	0	0	0	0	0	0	0	0	0	0	0	0	0	0	0	0
AIM1__chr6	0	0	0	0	0	0	0	0	0	0	0	0	0	0	0	0	0	1	0	0	0	0	0	0	0	0	0	0	0	0	0	0	0	0	0	0	0	0	0	0	0	0	0	0	0	0	0	0	1
AIMP1__chr4	5	0	2	5	2	3	0	0	8,01	3	1	0	4	3	0	5	0	5	0	4	6	10,01	0	0	6	0	1	0	0	1	4	0	7,01	5	0	0	0	0	0	0	0	0	0	4	2	4	1	6	2
AIMP2__chr7	0	0	0	0	0	0	0	0	0	0	0	0	0	0	0	0	0	0	0	0	0	0	0	0	0	0	0	0	0	0	0	0	0	0	0	0	0	0	0	0	0	0	0	0	0	0	0	0	0
AIPL1__chr17	0	0	0	0	0	0	0	0	0	0	0	0	0	0	0	0	0	0	0	0	0	0	0	0	0	0	0	0	0	0	0	0	0	0	0	0	0	0	0	0	0	0	0	0	0	0	0	0	0
AIP__chr11	1	0	3	2	0	1	0	0	2	2	2	0	2	2	0	2	0	2	0	7,01	5	0	0	0	2	0	1	3	0	1	3	0	4	2	0	0	0	0	0	0	0	0	0	5	3	3	0	4	2
AIRE__chr21	0	0	0	0	0	0	0	0	0	0	0	0	0	0	0	0	0	0	0	0	0	0	0	0	0	0	0	0	0	0	0	0	0	0	0	0	0	0	0	0	0	0	0	0	0	0	0	0	0
AJAP1__chr1	0	0	0	0	0	0	0	0	0	0	0	0	0	0	0	0	0	0	0	0	0	0	0	0	0	0	0	0	0	0	0	0	0	0	0	0	0	0	0	0	0	0	0	0	0	0	0	0	0
AJUBA__chr14	3	0	0	2	2	7,01	2	0	6	3	3	0	2	6	0	2	0	3	0	4	1	4	0	0	4	0	2	0	1	0	2	0	7,01	4	0	0	0	0	0	0	0	0	0	1	5	2	0	2	6
AK1__chr9	2	0	0	2	6	2	2	0	7,01	4	8,01	0	1	3	0	2	0	2	0	6	1	3	0	0	3	0	1	0	0	2	1	0	3	1	0	0	0	0	0	0	0	0	0	2	6	3	2	1	3
AK2__chr1	9,01	0	2	16,03	5	14,02	2	0	9,01	6	4	0	3	5	0	5	0	8,01	0	18,04	6	7,01	0	1	13,02	0	1	4	2	1	10,01	0	20,05	3	0	0	0	1	0	0	0	0	0	2	4	6	2	6	18,04
AK3__chr9	7,01	0	9,01	8,01	9,01	3	3	0	4	11,01	1	0	0	4	0	3	0	0	0	12,02	6	0	0	0	7,01	0	6	4	4	7,01	6	0	9,01	8,01	0	0	0	0	0	0	1	0	1	10,01	12,02	4	6	2	9,01
AK4__chr1	1	0	0	4	4	2	0	0	3	0	0	0	2	1	0	1	0	0	0	0	1	0	0	0	0	0	1	1	0	4	3	0	0	1	0	0	0	0	0	0	0	0	0	2	2	0	0	0	3
AK5__chr1	13,02	0	6	2	1	7,01	2	0	8,01	6	0	0	1	1	0	2	0	7,01	0	6	0	2	0	0	10,01	0	1	4	1	5	6	0	0	2	0	0	0	0	0	0	0	0	0	8,01	7,01	7,01	2	6	5
AK7__chr14	0	0	0	0	0	0	0	0	0	0	0	0	0	0	0	0	0	0	0	0	0	0	0	0	0	0	0	0	0	0	0	0	0	0	0	0	0	0	0	0	0	0	0	0	0	0	0	0	0
AK8__chr9	0	0	0	0	0	0	0	0	0	0	0	0	0	0	0	0	0	0	0	0	0	0	0	0	0	0	0	0	0	0	0	0	0	0	0	0	0	0	0	0	0	0	0	0	0	0	0	0	0
AKAP10__chr17	3	0	1	3	2	1	2	0	1	1	0	0	2	5	0	0	0	0	0	0	1	9,01	0	0	0	0	0	2	0	2	6	0	1	2	0	1	0	0	0	0	0	0	0	5	4	0	0	3	0
AKAP11__chr13	8,01	0	3	3	6	3	1	0	3	4	1	0	1	2	0	1	0	3	0	2	2	5	0	0	2	0	1	0	0	0	4	0	6	1	0	0	0	0	0	0	0	0	0	1	2	2	0	0	3
AKAP12__chr6	10,01	0	0	13,02	5	3	4	0	8,01	7,01	7,01	0	2	1	0	5	0	7,01	0	9,01	12,02	6	0	1	8,01	0	0	1	0	1	5	0	25,07	1	0	0	0	0	0	0	0	0	1	4	0	0	0	1	9,01
AKAP13__chr15	2	0	2	1	4	4	1	0	1	0	2	0	0	1	0	1	0	5	0	6	1	1	0	0	5	0	0	4	0	0	2	0	1	1	0	0	0	0	0	0	0	0	0	2	4	0	2	1	3
AKAP1__chr17	2	0	0	0	0	1	1	0	1	0	0	0	1	0	0	0	0	0	0	1	2	0	0	0	1	0	0	0	0	0	4	0	2	0	0	0	0	0	0	0	0	0	0	0	0	0	0	0	2
AKAP3__chr12	0	0	0	0	0	0	0	0	0	0	0	0	0	0	0	0	0	0	0	0	0	0	0	0	0	0	0	0	0	0	0	0	0	0	0	0	0	0	0	0	0	0	0	0	0	0	0	0	0
AKAP5__chr14	1	0	0	1	0	1	0	0	2	0	0	0	0	1	0	0	0	0	0	0	0	0	0	0	2	0	0	0	0	1	3	0	0	0	0	0	0	0	0	0	0	0	0	1	0	0	0	0	1
AKAP6__chr14	0	0	1	0	0	0	0	0	0	0	0	0	0	0	0	0	0	0	0	0	0	0	0	0	0	0	0	0	0	0	0	0	0	0	0	0	0	0	0	0	0	0	0	0	0	0	0	0	0
AKAP7__chr6	3	0	0	2	0	0	0	0	0	1	0	0	1	0	0	0	0	0	0	0	2	0	0	0	1	0	0	0	0	0	1	0	0	2	0	0	0	0	0	0	0	0	0	0	0	0	0	0	0
AKAP8L__chr19	0	0	0	1	1	0	0	0	0	0	0	0	0	1	0	1	0	0	0	0	1	0	0	0	3	0	0	0	1	0	0	0	0	1	0	0	0	0	0	0	0	0	0	1	0	0	1	3	0
AKAP8__chr19	4	0	0	3	1	6	2	0	5	1	1	0	1	2	0	0	0	2	0	4	2	3	0	0	5	0	1	0	0	1	3	0	1	1	0	0	0	0	0	0	0	0	0	0	1	5	1	0	0
AKAP9__chr7	2	0	0	1	1	5	6	0	5	2	4	1	0	1	0	0	0	4	0	10,01	3	0	0	0	7,01	0	2	0	0	1	3	0	5	0	0	0	0	0	0	0	0	0	0	5	10,01	0	1	1	6
AKD1__chr6	2	0	0	0	0	0	0	0	0	0	0	0	0	0	0	0	0	0	0	1	0	3	0	0	1	0	0	0	0	0	0	0	0	0	0	0	0	0	0	0	0	0	0	0	0	0	0	0	0
AKIP1__chr11	1	0	0	7,01	3	1	1	0	1	0	1	0	2	0	0	0	0	1	0	0	1	3	0	0	3	0	0	1	0	0	1	0	5	0	0	0	0	0	0	0	0	0	0	0	2	0	1	3	1
AKIRIN1__chr1	4	0	5	6	2	4	3	0	11,01	3	3	0	4	5	0	1	0	0	0	8,01	2	5	0	0	2	0	1	2	1	1	5	0	7,01	3	0	1	0	0	0	0	0	0	0	1	7,01	4	3	4	4
AKIRIN2__chr6	2	0	0	1	1	0	1	0	4	2	1	0	1	2	0	0	0	2	0	3	2	8,01	0	1	11,01	0	2	1	0	4	1	0	4	2	0	0	0	0	0	0	0	0	0	2	2	2	2	0	7,01
AKNA__chr9	0	0	0	1	0	1	2	0	1	2	0	0	0	1	0	2	0	0	0	2	0	1	0	0	0	0	1	1	0	1	0	0	1	0	0	0	0	0	0	0	0	0	0	1	1	0	0	0	1
AKR1A1__chr1	6	0	3	11,01	7,01	2	2	0	10,01	3	2	0	2	5	0	4	0	7,01	0	6	6	6	0	0	7,01	0	1	0	0	3	8,01	0	10,01	3	0	0	0	0	0	0	0	0	1	2	3	3	0	2	7,01
AKR1B10__chr7	0	0	0	0	0	0	0	0	0	0	0	0	0	0	0	0	0	0	0	0	0	0	0	0	0	0	0	0	0	0	0	0	0	0	0	0	0	0	0	0	0	0	0	1	0	0	0	0	0
AKR1B1__chr7	14,02	0	3	9,01	2	10,01	2	0	8,01	13,02	8,01	0	9,01	11,01	1	10,01	0	8,01	0	13,02	5	16,03	0	0	12,02	0	5	5	1	7,01	12,02	0	14,02	8,01	0	0	0	0	0	0	0	0	0	5	10,01	6	5	8,01	12,02
AKR1C2__chr10	0	0	0	0	0	0	0	0	0	0	0	0	0	0	0	0	0	0	0	0	0	0	0	0	0	0	0	0	0	0	0	0	0	0	0	0	0	0	0	0	0	0	0	0	0	0	0	0	0
AKR1C3__chr10	0	0	0	0	0	0	0	0	0	0	0	0	0	0	0	0	0	0	0	1	0	2	0	0	0	0	1	0	1	0	0	0	1	0	0	0	0	0	0	0	0	0	0	1	1	0	0	1	0
AKR7A2__chr1	3	0	1	4	3	5	1	1	5	2	6	0	1	3	0	8,01	0	3	0	3	8,01	6	0	0	4	0	1	2	0	3	5	0	7,01	1	1	0	0	0	1	0	0	0	0	4	0	2	7,01	2	4
AKR7A3__chr1	0	0	0	0	0	0	0	0	0	0	0	0	0	0	0	0	0	0	0	0	0	0	0	0	0	0	0	0	0	0	0	0	0	0	0	0	0	0	0	0	0	0	0	0	0	0	0	0	0
AKR7L__chr1	0	0	0	0	0	0	0	0	0	0	0	0	0	0	0	0	0	1	0	0	0	1	0	0	0	0	0	0	0	0	0	0	0	0	0	0	0	0	0	0	0	0	0	0	1	0	0	0	0
AKT1S1__chr19	2	0	3	16,03	13,02	7,01	0	1	14,02	5	7,01	0	7,01	4	0	10,01	0	6	0	9,01	12,02	13,02	1	0	9,01	0	3	1	6	4	8,01	0	13,02	5	0	0	0	0	0	0	0	0	1	3	7,01	10,01	4	12,02	10,01
AKT1__chr14	19,04	0	3	15,03	11,01	8,01	3	0	16,03	13,02	5	0	4	5	1	12,02	0	9,01	0	4	17,03	7,01	0	0	9,01	0	1	1	3	5	20,05	0	24,07	0	0	0	0	0	0	0	0	0	1	3	3	11,01	3	6	22,06
AKT2__chr19	5	0	2	10,01	5	6	2	0	6	5	3	0	4	3	0	0	0	0	0	6	2	5	0	0	6	0	0	1	1	0	2	0	5	5	0	0	0	0	0	0	0	0	0	2	7,01	3	0	3	1
AKT3__chr1	7,01	0	1	9,01	4	3	0	0	10,01	1	0	0	2	0	0	3	0	6	0	5	3	8,01	0	0	11,01	0	1	0	1	3	4	0	2	2	1	0	0	0	0	0	0	0	0	0	3	5	1	5	5
AKTIP__chr16	3	0	0	0	1	1	0	0	0	0	0	0	1	0	0	0	0	0	0	0	2	2	0	0	0	0	0	1	0	1	0	0	5	0	0	0	0	0	0	0	0	0	0	5	2	1	0	3	2
ALAD__chr9	2	0	2	2	0	7,01	3	0	8,01	1	1	0	1	1	0	6	0	4	0	1	1	0	0	0	1	0	4	2	1	2	1	0	5	3	0	0	0	0	0	0	0	0	0	7,01	2	2	1	3	3
ALAS1__chr3	5	0	1	1	1	2	1	0	0	0	2	0	0	3	0	1	0	1	0	1	1	0	0	0	1	0	1	0	1	1	1	0	3	0	0	0	0	0	0	0	0	0	0	2	0	1	2	0	2
ALB__chr4	0	0	0	0	0	0	0	0	0	0	0	0	0	0	0	0	0	0	0	0	0	0	0	0	0	0	0	0	0	0	0	0	0	0	0	0	0	0	0	0	0	0	0	0	0	0	0	0	0
ALCAM__chr3	35,15	0	12,02	77,72	25,07	20,05	15,03	0	55,37	41,2	31,11	1	15,03	44,23	0	32,12	0	41,2	1	61,45	41,2	45,24	0	0	44,23	0	19,04	21,05	8,01	33,13	52,33	0	85,88	16,03	1	2	3	0	1	2	1	1	0	24,07	41,2	17,03	19,04	20,05	43,22
ALDH16A1__chr19	1	0	0	3	1	4	1	0	2	1	3	0	0	1	0	1	0	2	0	0	0	2	0	0	0	0	1	1	2	0	0	0	3	0	0	0	0	0	1	0	0	0	0	0	0	2	2	1	0
ALDH18A1__chr10	8,01	0	5	9,01	3	3	4	0	4	3	3	1	2	6	0	4	0	5	0	12,02	7,01	6	0	0	3	0	0	1	1	5	9,01	0	4	6	0	0	0	0	0	0	0	0	0	3	0	7,01	3	4	8,01
ALDH1A1__chr9	0	0	0	0	0	0	0	0	0	0	0	0	0	1	0	0	0	0	0	0	0	0	0	0	0	0	0	0	2	9,01	0	0	0	0	0	0	0	0	0	0	0	0	0	0	0	0	0	0	0
ALDH1A3__chr15	23,06	0	5	22,06	5	4	12,02	0	19,04	7,01	2	0	8,01	14,02	0	4	0	6	0	11,01	3	24,07	0	0	8,01	0	0	3	7,01	8,01	8,01	0	9,01	27,09	0	0	0	0	1	0	1	0	0	10,01	13,02	15,03	6	16,03	17,03
ALDH1B1__chr9	1	0	1	0	0	1	1	0	0	0	1	0	2	1	0	2	0	0	0	1	0	1	0	0	0	0	0	0	0	1	3	0	0	0	0	0	0	0	0	0	0	0	0	0	2	0	1	1	0
ALDH1L2__chr12	0	0	0	0	0	0	0	0	0	0	0	0	0	1	0	0	0	0	0	3	0	0	0	0	0	0	0	0	0	0	0	0	0	0	0	0	0	0	0	0	0	0	0	0	0	0	0	0	0
ALDH2__chr12	1	0	1	2	2	0	0	0	4	0	1	0	0	1	0	0	0	2	0	0	0	1	0	0	1	0	1	0	1	0	0	0	0	0	0	0	0	0	0	0	0	0	0	0	6	0	0	3	1
ALDH3A2__chr17	3	0	2	1	1	11,01	4	0	11,01	5	1	0	6	2	0	4	0	6	0	5	5	3	0	0	2	0	2	0	1	0	6	0	5	1	0	0	1	0	1	0	0	0	0	3	1	1	1	3	5
ALDH3B1__chr11	4	0	3	2	2	7,01	2	0	6	3	2	0	3	0	0	1	0	2	0	4	0	6	0	0	2	0	2	0	3	3	2	0	4	3	0	0	0	0	0	0	0	0	0	1	4	2	0	1	2
ALDH3B2__chr11	0	0	0	0	0	0	0	0	0	0	0	0	0	0	0	0	0	0	0	0	0	0	0	0	0	0	0	0	0	0	0	0	0	0	0	0	0	0	0	0	0	0	0	0	0	0	0	0	0
ALDH4A1__chr1	0	0	0	1	0	0	0	0	1	0	1	0	0	0	0	2	0	0	0	0	0	0	0	0	0	0	0	1	0	0	0	0	2	0	0	0	0	0	0	0	0	0	0	3	0	0	2	0	0
ALDH5A1__chr6	0	0	2	1	0	0	0	0	0	2	1	0	2	0	0	2	0	0	0	3	0	1	0	0	1	0	1	0	0	0	0	0	0	1	0	0	0	0	0	0	0	0	0	1	1	0	0	0	1
ALDH6A1__chr14	0	0	2	0	0	0	0	0	0	0	0	0	0	0	0	0	0	0	0	1	0	0	0	0	1	0	0	0	0	0	1	0	0	1	0	0	0	0	0	0	0	0	0	0	0	0	0	0	0
ALDH7A1__chr5	13,02	1	4	8,01	9,01	10,01	3	0	15,03	10,01	5	0	3	6	0	10,01	0	8,01	0	19,04	0	15,03	0	0	18,04	0	4	2	2	5	10,01	3	7,01	8,01	0	0	0	0	0	0	0	0	1	7,01	5	9,01	8,01	5	13,02
ALDH8A1__chr6	1	0	0	0	0	0	0	0	0	0	0	0	0	0	0	0	0	0	0	0	0	0	0	0	0	0	0	0	0	0	0	0	0	0	0	0	0	0	0	0	0	0	0	0	0	0	0	0	0
ALDH9A1__chr1	19,04	0	6	8,01	4	5	8,01	0	15,03	10,01	4	0	6	7,01	0	7,01	0	3	0	11,01	6	7,01	0	0	15,03	0	2	1	1	6	10,01	0	10,01	3	0	1	1	0	0	0	0	0	0	7,01	6	3	2	3	11,01
ALDOA__chr16	13,02	0	5	34,14	33,13	19,04	7,01	0	59,42	28,09	14,02	0	20,05	20,05	0	40,19	0	30,11	0	24,07	42,21	32,12	0	0	40,19	0	6	6	15,03	22,06	33,13	0	21,05	12,02	0	0	0	0	1	1	0	0	0	21,05	34,14	24,07	13,02	22,06	31,11
ALDOB__chr9	0	0	0	0	0	0	0	0	0	0	0	0	0	0	0	0	0	0	0	0	0	0	0	0	0	0	0	0	0	0	0	0	0	0	0	0	0	0	0	0	0	0	0	0	0	0	0	0	0
ALDOC__chr17	0	0	0	0	0	0	0	0	0	0	0	0	0	0	0	0	0	0	0	0	0	0	0	0	0	0	0	0	0	0	0	0	0	0	0	0	0	0	0	1	0	0	0	0	0	0	0	0	0
ALG10B__chr12	2	0	0	6	1	0	0	0	1	5	0	0	0	1	0	0	0	0	0	0	3	1	0	0	3	0	0	0	0	1	2	0	1	2	0	0	0	0	0	0	0	0	0	0	0	1	1	0	4
ALG10__chr12	0	0	0	0	0	0	0	0	1	1	0	0	1	0	0	0	0	0	0	0	0	1	0	0	1	0	0	1	0	0	0	0	0	0	0	0	0	0	0	0	0	0	0	0	0	0	0	0	0
ALG11__chr13	1	0	0	0	0	0	0	0	0	0	0	0	0	0	0	0	0	0	0	0	0	0	0	0	0	0	0	0	0	0	0	0	0	0	0	0	0	0	0	0	0	0	0	0	0	0	0	0	0
ALG12__chr22	4	0	0	3	1	4	0	0	2	2	2	0	1	4	0	0	0	0	0	2	0	4	0	0	1	0	0	0	3	5	2	0	4	2	0	0	0	0	0	0	0	0	0	0	2	2	1	2	1
ALG13__chrX	2	0	0	6	1	1	0	0	1	1	0	0	1	2	0	3	0	1	0	2	2	2	1	0	3	0	0	0	0	1	4	0	5	2	0	0	0	0	0	0	0	0	0	2	0	0	0	1	1
ALG14__chr1	1	0	1	0	0	0	0	0	2	1	2	0	0	3	0	3	0	1	0	1	1	3	0	0	4	0	1	0	0	0	0	0	2	0	0	0	0	0	0	0	0	0	0	1	2	2	0	1	1
ALG1L9P__chr11	0	0	0	0	0	0	0	0	0	0	0	0	0	0	0	0	0	0	0	1	0	1	0	0	0	0	0	0	0	0	0	0	0	0	0	0	0	0	0	0	0	0	0	0	0	0	0	0	0
ALG1__chr16	1	0	0	0	0	0	0	0	0	0	0	0	0	0	0	0	0	0	0	0	0	0	0	0	0	0	0	0	0	0	0	0	1	0	0	0	0	0	0	0	0	0	0	0	1	0	0	0	0
ALG2__chr9	2	0	3	7,01	3	1	1	0	4	3	9,01	0	0	3	0	4	0	5	0	6	4	4	0	0	0	0	0	1	1	5	1	0	3	2	0	0	0	0	0	0	0	0	0	0	3	4	4	7,01	5
ALG3__chr3	10,01	0	1	7,01	2	6	4	0	14,02	4	4	0	6	6	0	12,02	0	8,01	0	9,01	5	6	0	0	10,01	0	1	0	1	7,01	4	0	20,05	4	0	0	1	0	0	0	0	0	0	4	6	13,02	4	0	7,01
ALG5__chr13	10,01	1	0	4	0	3	2	0	6	5	4	0	0	6	0	3	0	4	0	0	1	1	0	0	4	0	2	2	0	2	6	0	2	2	0	0	0	0	0	0	1	0	0	2	2	2	2	3	4
ALG6__chr1	2	0	0	0	1	1	1	0	2	0	0	0	3	0	0	2	0	0	0	1	0	3	0	0	0	0	0	1	0	0	2	0	3	0	0	0	0	0	0	0	0	0	0	0	0	0	0	0	4
ALG8__chr11	11,01	0	0	12,02	9,01	2	1	0	11,01	7,01	2	0	1	3	0	9,01	0	7,01	0	6	7,01	6	0	0	10,01	0	1	2	0	0	8,01	0	14,02	4	0	0	0	0	0	0	0	0	0	1	1	3	0	2	4
ALG9__chr11	7,01	0	1	4	1	1	0	0	0	2	0	0	3	1	0	4	0	0	0	2	0	2	0	0	1	0	0	0	0	0	4	0	2	1	0	0	0	0	0	0	0	0	0	0	3	2	2	1	1
ALKBH1__chr14	1	0	0	0	1	0	1	0	0	1	0	0	0	1	0	0	0	2	0	1	0	6	0	0	0	0	0	1	1	0	0	0	4	1	1	0	0	0	0	0	0	0	0	0	0	0	0	0	0
ALKBH2__chr12	1	0	0	2	1	1	0	0	2	0	0	0	0	1	0	0	0	0	0	0	0	0	0	0	0	0	0	0	0	0	0	0	2	1	0	0	0	0	0	0	0	0	0	0	1	0	0	0	0
ALKBH3__chr11	1	0	1	1	1	0	0	0	0	3	2	0	0	0	0	1	0	0	0	1	0	1	0	0	4	0	1	2	0	0	0	0	2	1	0	0	0	0	0	0	0	0	0	0	0	2	2	0	0
ALKBH4__chr7	0	0	0	1	0	0	1	0	0	0	0	0	0	0	0	2	0	0	0	0	1	1	0	0	0	0	0	0	0	0	0	0	0	0	0	0	0	0	0	0	0	0	0	0	1	0	0	0	1
ALKBH5__chr17	11,01	0	2	11,01	6	4	1	1	8,01	4	2	0	5	7,01	0	3	0	4	0	10,01	8,01	8,01	0	0	13,02	0	3	3	4	3	3	0	22,06	2	0	0	0	0	0	0	0	0	0	4	3	3	3	11,01	11,01
ALKBH6__chr19	1	0	0	5	0	1	1	0	0	2	0	0	0	1	0	0	0	0	0	3	4	0	0	0	3	0	1	0	0	0	2	0	1	1	0	0	0	0	0	0	0	0	0	3	1	0	0	0	1
ALKBH7__chr19	2	0	3	1	0	1	1	0	4	0	0	0	1	0	0	3	0	2	0	2	0	1	0	0	5	0	0	0	0	1	1	0	0	1	0	0	0	0	0	0	0	0	0	1	1	0	2	1	0
ALKBH8__chr11	0	0	1	0	1	0	0	0	2	2	1	0	1	0	0	0	0	1	0	0	1	1	0	0	0	0	0	0	0	0	0	0	0	0	0	0	0	0	0	0	0	0	0	1	1	0	0	0	1
ALK__chr2	0	0	0	0	0	0	0	0	0	0	0	0	0	0	0	0	0	0	0	0	0	0	0	0	0	0	0	0	0	0	0	0	0	0	0	0	0	0	0	0	0	0	0	0	0	0	0	0	0
ALMS1P__chr2	0	0	0	0	0	0	0	0	0	0	0	0	0	0	0	0	0	0	0	0	0	0	0	0	0	0	0	0	0	0	0	0	0	0	0	0	0	0	0	0	0	0	0	0	0	0	0	0	0
ALMS1__chr2	1	0	0	0	1	0	2	0	1	0	0	0	0	0	0	1	0	0	0	0	0	1	0	0	0	0	1	0	0	0	0	0	1	0	0	0	1	0	0	0	0	0	0	0	0	1	0	0	2
ALOX12B__chr17	0	0	0	0	0	0	0	0	0	0	0	0	0	0	0	0	0	0	0	0	0	0	0	0	0	0	0	0	0	0	0	0	0	0	0	0	0	0	0	0	0	0	0	0	0	0	0	0	0
ALOX12__chr17	0	0	0	0	0	0	0	0	0	0	0	0	0	0	0	0	0	0	0	0	0	0	0	0	0	0	0	0	0	0	0	0	0	0	0	0	0	0	0	0	0	0	0	0	0	0	0	0	0
ALOX5AP__chr13	0	0	0	0	0	0	0	0	0	0	0	0	0	0	0	0	0	0	0	2	0	0	0	0	0	0	0	0	0	0	0	0	0	0	0	0	0	0	0	0	0	0	0	0	0	0	0	3	0
ALOX5__chr10	0	0	0	0	0	0	0	0	0	0	0	0	0	0	0	0	0	0	0	0	0	0	0	0	0	0	0	0	0	0	0	0	0	0	0	0	0	0	0	0	0	0	0	0	0	0	0	0	0
ALPK1__chr4	0	0	0	0	2	0	0	0	3	0	0	0	0	0	0	2	0	0	0	1	0	4	0	0	2	0	0	1	0	1	0	0	0	0	0	0	0	0	0	0	0	0	0	2	2	0	1	1	1
ALPK2__chr18	0	0	0	0	0	0	0	0	0	0	0	0	0	0	0	0	0	0	0	0	0	0	0	0	0	0	0	0	0	0	0	0	0	0	0	0	0	0	0	0	0	0	0	0	0	0	0	0	0
ALPK3__chr15	0	0	0	0	0	0	0	0	0	0	0	0	0	0	0	0	0	0	0	0	0	0	0	0	0	0	0	1	0	0	0	0	0	0	0	0	0	0	0	0	0	0	0	0	0	0	0	0	0
ALPP__chr2	0	0	0	0	0	0	0	0	0	0	0	0	0	0	0	0	0	0	0	0	0	0	0	0	0	0	0	0	0	0	0	0	0	0	0	0	0	0	0	0	0	0	0	0	0	0	0	0	0
ALS2CL__chr3	0	0	0	1	0	1	0	0	0	0	0	0	0	0	0	0	0	0	0	0	0	0	0	0	0	0	0	0	1	0	0	0	0	0	0	0	0	0	0	0	0	0	0	0	0	0	0	0	0
ALS2CR11__chr2	0	0	0	0	0	0	0	0	0	0	0	0	0	0	0	0	0	0	0	0	0	0	0	0	0	0	0	0	0	0	0	0	0	0	0	0	0	0	0	0	0	0	0	0	0	0	0	0	0
ALS2CR12__chr2	0	0	0	0	0	0	0	0	0	0	0	0	0	0	0	0	0	0	0	0	0	0	0	0	0	0	0	0	0	0	0	0	0	0	0	0	0	0	0	0	0	0	0	0	0	0	0	0	0
ALS2CR8__chr2	0	0	0	0	0	0	0	0	0	0	0	0	0	1	1	0	0	0	0	1	0	0	0	0	1	0	0	0	0	2	0	0	1	0	0	0	0	0	0	0	0	0	0	0	0	0	1	0	0
ALS2__chr2	9,01	0	1	4	1	0	0	0	2	5	1	0	4	3	0	3	0	0	0	2	0	1	0	0	4	0	0	1	0	5	1	0	1	2	0	0	0	0	0	0	0	0	0	0	3	0	0	3	3
ALX1__chr12	0	0	1	0	2	0	0	0	0	0	1	0	1	1	0	1	0	0	0	1	1	0	0	0	0	0	0	1	0	0	1	0	0	2	0	0	0	0	0	0	0	0	0	0	0	0	0	0	0
ALYREF__chr17	0	0	0	7,01	6	1	1	0	8,01	10,01	3	1	5	6	0	5	0	4	0	2	4	4	0	0	7,01	0	0	5	3	0	9,01	0	3	1	0	0	0	1	0	0	0	0	0	0	0	1	1	1	4
AMBRA1__chr11	2	0	1	1	0	0	1	0	3	3	2	0	1	2	0	0	0	1	0	2	4	0	0	0	1	0	0	0	0	2	0	0	0	0	0	0	0	0	0	0	0	0	0	2	0	0	0	1	0
AMD1__chr6	9,01	0	0	8,01	3	4	2	0	8,01	5	2	0	0	1	0	6	0	1	0	1	6	12,02	0	0	20,05	0	1	2	0	0	3	0	7,01	0	0	0	0	0	0	0	0	0	2	3	1	2	5	0	11,01
AMDHD2__chr16	0	0	0	0	0	0	0	0	1	1	0	0	0	0	0	0	0	0	0	0	1	0	0	0	0	0	0	0	0	0	0	0	0	0	0	0	0	0	0	0	0	0	0	0	0	0	0	0	0
AMELX__chrX	0	0	0	0	0	0	0	0	0	0	0	0	0	0	0	0	0	0	0	0	0	0	0	0	0	0	0	0	0	0	0	0	0	0	0	0	0	0	0	0	0	0	0	0	0	0	1	0	0
AMER1__chrX	0	0	0	0	0	0	0	0	0	0	0	0	0	0	0	0	0	0	0	0	0	0	0	0	0	0	0	0	0	0	0	0	0	0	0	0	0	0	0	0	0	0	0	0	0	0	0	0	0
AMER2__chr13	0	0	0	0	0	0	0	0	0	0	0	0	0	0	1	0	0	0	0	0	0	0	0	0	0	0	0	0	0	0	0	0	0	0	0	0	0	0	0	0	0	0	0	0	0	0	0	0	0
AMER3__chr2	0	0	0	0	0	0	0	0	0	0	0	0	0	0	0	0	0	0	0	0	0	0	0	0	0	0	0	0	0	0	0	0	0	0	0	0	0	0	0	0	0	0	0	0	0	0	0	0	0
AMFR__chr16	1	0	0	3	2	0	2	0	9,01	5	1	0	1	0	0	1	1	3	0	4	4	7,01	0	0	6	0	2	0	1	2	2	0	2	0	0	0	0	0	0	0	0	0	0	1	5	2	0	3	5
AMH__chr19	2	0	0	0	0	0	0	0	1	0	0	0	1	0	0	0	0	0	0	0	0	0	0	0	0	0	0	0	0	0	0	0	0	0	0	0	0	0	0	0	0	0	0	0	0	0	0	1	0
AMIGO1__chr1	0	0	0	0	0	0	0	0	0	0	0	0	0	0	0	0	0	0	0	0	0	0	0	0	0	0	0	0	0	0	0	0	0	0	0	0	0	0	0	0	0	0	0	0	0	0	0	0	0
AMIGO2__chr12	80,78	1	26,08	23,06	31,11	53,34	12,02	0	44,23	24,07	48,28	0	36,15	64,5	0	21,05	0	43,22	0	27,09	45,24	13,02	0	0	66,53	1	29,1	8,01	22,06	52,33	76,7	1	64,5	41,2	0	2	2	0	0	0	1	0	1	46,25	47,27	16,03	11,01	44,23	65,51
AMIGO3__chr3	0	0	0	0	0	0	0	0	0	0	0	0	1	1	0	0	0	0	0	0	0	1	0	0	0	0	0	0	0	1	1	0	1	0	0	0	0	0	0	0	0	0	0	0	0	0	0	0	0
AMMECR1L__chr2	0	0	0	1	3	0	1	0	10,01	2	2	0	0	2	0	3	0	2	0	1	1	2	0	0	1	0	2	1	0	0	1	0	1	0	0	0	0	0	0	0	1	0	0	2	5	2	2	3	5
AMMECR1__chrX	3	0	0	2	2	1	1	0	4	2	0	0	2	1	0	0	0	3	0	1	4	5	0	0	1	0	0	2	1	0	3	0	2	0	0	0	0	1	0	0	0	0	1	1	0	2	0	0	2
AMN1__chr12	0	0	2	0	1	0	2	0	1	0	1	0	0	0	0	0	0	1	0	1	0	0	0	0	2	0	0	0	0	0	1	0	0	0	0	0	0	0	0	0	0	0	0	0	0	0	1	0	2
AMOTL1__chr11	5	0	3	2	2	7,01	3	0	1	2	0	1	8,01	4	0	4	0	4	0	7,01	2	2	0	0	8,01	0	5	1	0	1	3	0	11,01	2	0	1	0	0	0	0	0	0	0	8,01	4	5	2	9,01	4
AMOTL2__chr3	6	0	2	25,07	29,1	15,03	2	0	20,05	27,09	16,03	0	11,01	1	0	7,01	0	9,01	0	15,03	24,07	14,02	0	0	15,03	3	3	4	8,01	22,06	13,02	0	18,04	7,01	0	0	0	0	0	1	0	0	0	9,01	14,02	2	4	8,01	7,01
AMOT__chrX	1	0	1	0	0	0	0	0	2	2	0	0	0	0	0	2	0	0	0	2	0	0	0	0	1	0	0	0	0	0	2	0	5	0	0	0	0	0	0	0	0	0	0	0	0	0	1	1	1
AMPD2__chr1	1	0	4	5	1	2	2	0	4	3	1	0	2	2	0	5	0	3	0	2	2	8,01	0	0	1	0	1	0	2	1	0	1	2	1	0	0	0	0	0	0	0	1	0	1	5	1	2	3	2
AMPD3__chr11	0	0	0	0	1	0	1	0	0	0	0	0	1	0	0	1	0	1	0	1	0	0	0	0	0	0	0	0	0	0	0	0	0	1	0	0	0	0	0	0	0	0	0	0	0	1	0	1	0
AMPH__chr7	0	0	0	0	0	0	0	0	0	0	0	0	0	0	0	0	0	0	0	0	0	0	0	0	0	0	0	0	0	0	0	0	0	0	0	0	0	0	0	0	0	0	0	0	0	0	0	0	0
AMTN__chr4	7,01	0	1	5	27,09	15,03	1	0	7,01	1	1	0	7,01	1	0	0	0	13,02	0	22,06	5	2	0	0	6	0	0	2	5	5	3	0	5	4	0	0	0	0	0	0	1	0	0	6	3	0	8,01	1	16,03
AMT__chr3	2	0	4	0	0	0	0	0	0	0	0	0	0	1	0	0	0	0	0	0	0	0	0	0	0	0	0	0	0	1	0	0	0	0	0	0	0	0	0	0	0	0	0	0	0	1	0	1	1
AMY2B__chr1	1	0	0	1	0	1	0	0	0	0	0	0	0	1	0	0	0	0	0	1	0	0	0	0	1	0	0	0	0	0	0	0	0	1	0	0	0	0	0	0	0	0	0	0	1	1	0	0	0
AMZ1__chr7	0	0	0	0	0	0	0	0	0	0	0	0	0	0	0	0	0	0	0	0	0	0	0	0	0	0	0	0	0	0	0	0	0	0	0	0	0	0	0	0	0	0	0	0	0	0	0	0	0
AMZ2P1__chr17	0	0	0	0	1	0	0	0	1	0	0	0	0	1	0	0	0	1	0	1	1	0	0	0	2	0	3	0	0	1	0	0	1	1	0	0	0	0	0	0	0	0	0	1	2	0	0	0	0
AMZ2__chr17	4	0	6	3	1	4	1	0	6	6	2	0	4	4	0	4	0	4	0	12,02	0	3	0	0	10,01	0	0	5	2	0	3	0	5	2	0	0	0	0	0	0	0	0	0	2	2	6	3	2	8,01
ANAPC10__chr4	1	0	1	1	2	0	0	0	1	1	0	0	0	2	0	1	0	1	0	0	0	1	0	0	4	0	1	1	0	0	0	0	2	2	0	0	0	0	0	0	0	0	0	0	1	1	0	0	4
ANAPC11__chr17	9,01	0	3	7,01	1	6	2	0	10,01	5	3	0	1	0	0	0	0	3	0	7,01	5	14,02	0	0	9,01	0	3	1	2	0	5	0	5	2	0	0	0	0	0	0	0	0	0	3	2	3	2	1	5
ANAPC13__chr3	10,01	0	3	11,01	6	5	8,01	0	9,01	13,02	7,01	0	10,01	7,01	0	9,01	0	7,01	0	4	6	15,03	0	0	19,04	0	4	1	1	3	5	0	12,02	5	0	0	0	0	0	0	0	0	0	2	3	8,01	5	13,02	11,01
ANAPC15__chr11	0	0	0	0	0	0	0	0	0	0	0	0	0	0	0	0	0	0	0	0	0	0	0	0	0	0	0	0	0	0	0	0	0	0	0	0	0	0	0	0	0	0	0	0	0	0	0	0	0
ANAPC16__chr10	6	0	5	3	1	7,01	4	0	10,01	8,01	5	0	1	4	0	4	0	3	0	5	4	11,01	0	0	4	0	1	2	2	2	4	0	5	4	0	0	0	0	0	0	0	0	0	4	7,01	6	3	8,01	1
ANAPC1__chr2	2	0	1	3	0	3	1	0	3	2	1	0	0	0	0	6	0	2	0	3	4	2	0	0	2	0	0	1	0	1	4	0	2	1	0	0	0	0	0	0	0	0	0	0	1	0	0	2	5
ANAPC2__chr9	2	0	0	0	0	0	0	0	0	2	0	0	0	0	0	0	0	0	0	0	1	1	0	0	0	0	0	0	1	1	0	0	2	1	0	0	0	0	0	0	0	0	0	0	0	0	0	0	0
ANAPC4__chr4	1	0	0	4	0	0	1	0	0	4	0	0	1	1	0	0	0	1	0	0	3	0	0	0	5	0	0	0	0	1	2	0	1	1	0	0	0	0	0	0	0	0	0	0	0	0	0	0	3
ANAPC5__chr12	20,05	0	9,01	25,07	11,01	8,01	2	0	13,02	17,03	7,01	0	11,01	5	0	15,03	0	13,02	0	11,01	10,01	19,04	0	0	25,07	0	4	9,01	4	5	18,04	0	20,05	15,03	0	0	0	1	0	0	0	0	1	5	7,01	8,01	8,01	10,01	22,06
ANAPC7__chr12	8,01	0	1	9,01	2	3	2	0	10,01	7,01	3	0	6	2	0	2	0	7,01	0	5	4	3	0	1	9,01	0	0	3	0	0	7,01	0	12,02	3	0	0	0	0	0	0	0	0	0	2	1	3	4	1	8,01
ANGEL1__chr14	1	0	1	0	1	0	0	0	0	1	0	0	0	1	0	1	0	0	0	1	0	2	0	0	0	0	1	0	0	1	0	0	0	1	0	0	0	0	0	0	0	0	0	0	0	0	0	0	0
ANGEL2__chr1	5	0	4	4	1	1	2	0	2	1	0	0	2	2	0	8,01	0	0	0	3	0	1	0	0	1	0	1	1	0	2	6	0	3	2	0	0	0	0	0	0	0	0	0	0	1	1	1	0	1
ANGPT1__chr8	0	0	1	0	0	0	0	0	2	0	1	0	0	1	0	0	0	0	0	2	0	0	0	0	0	0	0	0	0	0	0	0	0	0	0	0	0	0	0	0	0	0	0	1	4	1	0	1	0
ANGPT2__chr8	0	0	0	0	0	0	0	0	0	0	0	0	0	0	0	0	0	0	0	0	0	0	0	0	0	0	0	0	0	0	0	0	0	0	0	0	0	0	0	0	0	0	0	0	0	0	0	0	0
ANGPTL2__chr9	2	0	5	2	0	4	4	0	2	0	0	0	1	0	0	2	0	0	0	2	0	1	0	0	0	0	0	0	0	0	0	0	1	2	0	0	0	0	0	0	0	0	0	2	2	0	0	0	2
ANGPTL4__chr19	0	0	1	0	0	0	0	0	0	0	0	0	0	0	0	0	0	0	0	0	0	0	0	0	0	0	1	0	0	1	0	0	0	0	0	0	0	0	0	0	0	0	0	1	2	0	0	5	0
ANG__chr14	0	0	0	2	1	0	0	0	2	2	0	0	1	2	0	0	0	1	0	0	0	0	0	0	3	0	0	1	1	0	0	0	2	0	0	0	0	0	0	0	0	0	0	0	0	1	0	1	0
ANK1__chr8	0	0	1	0	0	0	0	0	0	0	0	0	0	0	0	0	0	0	0	1	0	0	0	0	0	0	0	0	0	0	0	0	0	0	0	0	0	0	0	0	0	0	1	0	2	0	0	0	0
ANK2__chr4	0	0	2	0	0	2	0	0	0	0	1	0	1	0	0	0	0	0	0	0	0	2	0	0	0	0	0	0	0	1	0	0	0	0	0	0	0	0	0	0	0	0	0	2	1	1	0	0	0
ANK3__chr10	0	0	0	0	0	2	4	0	0	0	0	0	0	3	0	0	2	1	0	1	1	0	0	0	2	0	1	0	0	0	1	0	1	3	0	0	0	0	1	0	0	0	0	2	5	0	1	1	2
ANKAR__chr2	0	0	0	0	0	0	0	0	0	0	0	0	0	0	0	0	0	0	0	0	0	0	0	0	0	0	0	0	0	1	0	0	0	0	0	0	0	0	0	0	0	0	0	0	0	0	0	0	0
ANKDD1A__chr15	0	0	0	0	0	0	0	0	0	0	0	0	0	0	0	0	0	0	0	0	0	0	0	0	0	0	0	0	0	0	0	0	0	0	0	0	0	0	0	0	0	0	0	0	0	0	0	0	1
ANKEF1__chr20	0	0	0	0	0	0	1	0	0	0	0	0	0	0	0	0	0	0	0	0	0	0	0	0	1	0	0	0	0	1	0	0	0	0	0	0	0	0	0	0	0	0	0	0	1	0	0	0	0
ANKFN1__chr17	0	0	0	0	0	0	0	0	0	2	0	0	0	0	0	0	0	0	0	0	0	0	0	0	0	0	0	0	0	0	0	0	0	0	0	0	0	0	0	0	0	0	0	0	0	0	0	0	0
ANKFY1__chr17	2	0	0	2	2	0	0	0	3	4	2	0	1	0	0	5	0	0	0	2	1	4	0	0	1	0	1	0	1	2	1	0	5	1	0	0	0	0	0	0	0	0	0	3	1	0	0	4	6
ANKHD1-EIF4EBP3__chr5	0	0	0	0	0	0	0	0	0	0	0	0	0	0	0	0	0	0	0	0	0	0	0	0	0	0	0	0	0	0	0	0	0	0	0	0	0	0	0	0	0	0	0	0	0	0	0	0	0
ANKHD1__chr5	2	0	0	3	2	0	4	0	4	0	3	0	0	1	0	1	0	2	0	4	0	9,01	0	0	2	0	0	0	0	0	2	0	2	0	0	0	0	0	0	0	0	0	0	1	0	1	1	0	1
ANKH__chr5	5	0	1	1	0	1	4	0	1	0	1	0	0	1	0	0	0	0	0	1	0	2	0	0	1	0	1	0	0	0	1	0	2	0	0	0	1	0	0	0	0	0	0	3	4	0	0	3	0
ANKIB1__chr7	2	1	2	7,01	3	2	5	0	9,01	1	4	0	3	4	0	0	0	4	0	13,02	3	8,01	0	0	5	0	0	2	1	7,01	4	0	10,01	6	0	0	0	0	0	0	0	0	0	1	7,01	3	1	2	5
ANKK1__chr11	0	0	0	0	0	0	0	0	0	0	0	0	0	0	0	0	0	0	0	0	0	0	0	0	0	0	0	0	0	0	0	0	0	0	0	0	0	0	0	0	0	0	0	0	0	0	0	0	0
ANKLE1__chr19	0	0	0	1	0	0	0	0	0	0	0	0	0	0	0	0	0	0	0	0	0	0	0	0	0	0	0	0	0	0	0	0	0	0	0	0	0	0	0	0	0	0	0	0	0	0	0	0	0
ANKLE2__chr12	10,01	0	7,01	16,03	6	5	2	0	10,01	9,01	7,01	0	5	6	0	5	0	2	0	10,01	4	14,02	0	0	8,01	0	5	0	5	4	7,01	0	14,02	3	0	0	0	0	0	1	0	0	0	7,01	7,01	1	3	10,01	6
ANKMY1__chr2	0	0	0	0	1	0	1	0	0	0	0	0	0	0	0	0	0	0	0	1	0	0	0	0	2	0	0	0	0	0	1	0	0	0	0	0	0	0	0	0	0	0	0	0	0	0	0	1	0
ANKMY2__chr7	4	0	2	2	0	1	0	0	2	0	0	0	1	0	0	0	0	0	0	1	4	0	0	0	2	0	0	0	0	0	4	0	0	1	0	0	0	0	0	0	0	0	0	0	1	2	1	1	0
ANKRA2__chr5	1	0	2	3	0	2	1	0	1	3	0	0	1	3	0	0	0	0	0	2	0	1	0	0	3	0	0	0	0	6	1	0	0	1	0	0	0	1	0	0	0	0	0	1	1	0	0	4	2
ANKRD10__chr13	3	0	5	2	1	1	0	0	5	3	0	0	0	0	0	0	0	1	0	4	0	0	0	0	0	0	0	1	0	1	1	0	4	0	0	0	0	0	0	0	0	0	0	2	1	1	0	4	0
ANKRD11__chr16	14,02	0	7,01	11,01	11,01	6	2	0	7,01	8,01	4	0	1	7,01	0	8,01	0	9,01	0	14,02	9,01	16,03	0	0	18,04	0	8,01	2	5	7,01	9,01	0	4	3	0	0	0	0	0	0	0	0	0	10,01	12,02	6	8,01	9,01	13,02
ANKRD12__chr18	4	0	3	0	1	5	8,01	0	6	1	0	0	2	5	0	1	0	2	0	6	7,01	0	0	0	3	0	1	0	2	2	0	0	6	3	0	0	0	0	0	1	0	0	0	2	2	1	3	2	3
ANKRD13A__chr12	9,01	0	4	18,04	4	4	0	0	3	9,01	3	0	2	0	0	7,01	0	1	0	3	7,01	3	0	0	9,01	0	2	2	0	0	5	0	9,01	1	0	1	0	0	0	0	0	0	0	1	3	2	1	2	6
ANKRD13B__chr17	0	0	0	2	1	2	1	0	0	0	0	0	1	1	0	0	0	0	0	0	1	1	0	0	1	0	0	0	2	0	0	0	1	0	0	0	0	0	0	0	0	0	0	0	1	0	0	1	1
ANKRD13C__chr1	2	0	1	1	2	1	0	0	1	2	1	0	0	1	0	0	0	2	0	0	0	2	0	0	1	0	0	0	0	2	0	0	1	1	0	0	0	0	0	0	0	0	0	4	1	1	0	0	2
ANKRD13D__chr11	1	0	3	1	1	3	1	0	1	3	1	0	0	1	0	0	0	1	0	4	0	2	0	0	3	0	0	0	1	1	0	0	2	0	0	0	0	0	0	0	0	0	0	3	3	0	0	5	0
ANKRD16__chr10	0	0	0	0	0	0	1	0	1	0	0	0	0	0	0	2	0	0	0	0	0	0	0	0	0	0	0	0	0	1	1	0	0	1	0	0	0	0	0	0	0	0	0	0	0	0	1	1	0
ANKRD17__chr4	6	0	5	4	5	0	5	0	1	3	3	0	3	3	2	4	0	3	0	17,03	5	7,01	0	0	3	0	3	4	1	2	2	0	9,01	3	0	0	0	0	0	0	0	0	0	4	5	1	3	2	2
ANKRD18A__chr9	0	0	0	0	0	0	0	0	0	0	0	0	0	0	0	0	0	0	0	0	0	0	0	0	0	0	0	0	0	0	0	0	0	0	0	0	0	0	0	0	0	0	0	0	0	0	0	0	0
ANKRD18B__chr9	0	0	0	0	0	0	0	0	0	0	0	0	0	0	0	0	0	0	0	1	0	0	0	0	0	0	0	0	0	0	0	0	0	0	0	0	0	0	0	0	0	0	0	0	0	0	0	0	0
ANKRD18DP__chr3	0	0	0	0	0	0	0	0	0	2	0	0	1	0	0	0	0	0	0	1	1	0	0	0	0	0	0	0	0	0	0	0	0	0	0	0	0	0	0	0	0	0	0	0	0	0	0	0	0
ANKRD19P__chr9	0	0	0	0	0	0	0	0	0	0	0	0	0	0	0	0	0	0	0	0	0	0	0	0	1	0	0	0	0	0	0	0	0	0	0	0	0	0	0	0	0	0	0	0	0	0	0	0	0
ANKRD1__chr10	4	0	0	0	1	0	0	0	2	4	5	0	1	0	0	0	0	2	0	0	0	0	0	0	0	0	0	0	2	1	0	0	2	4	0	0	0	0	0	0	0	0	0	1	0	0	0	0	4
ANKRD20A12P__chr1	0	0	0	0	0	0	0	0	0	0	1	0	1	0	0	0	0	0	0	0	0	0	0	0	0	0	0	1	0	0	0	0	0	0	0	0	0	0	0	0	0	0	0	0	2	0	0	0	0
ANKRD20A19P__chr13	0	0	0	0	0	0	0	0	0	0	0	0	0	0	0	0	0	0	0	0	0	0	0	0	0	0	0	0	0	0	0	0	0	0	0	0	0	0	0	0	0	0	0	0	0	0	0	0	0
ANKRD20A8P__chr2	0	0	0	0	0	0	0	0	0	0	0	0	0	0	0	0	0	0	0	0	0	0	0	0	0	0	0	0	0	0	0	0	0	0	0	0	0	0	0	0	0	0	0	0	0	0	0	0	0
ANKRD20A9P__chr13	3	0	2	5	1	3	2	0	2	3	2	0	4	4	0	0	0	1	0	2	0	7,01	0	0	3	0	0	2	0	2	4	0	1	1	0	0	1	0	0	0	0	0	0	2	2	3	1	2	3
ANKRD22__chr10	0	0	0	0	0	0	0	0	0	0	0	0	0	0	0	0	0	0	0	0	0	0	0	0	0	0	0	1	0	0	0	0	0	0	0	0	0	0	0	0	0	0	0	0	0	0	0	0	0
ANKRD23__chr2	0	0	0	0	0	0	0	0	0	0	0	0	0	0	0	0	0	0	0	0	1	0	0	0	0	0	0	0	0	0	0	0	0	0	0	0	0	0	0	0	0	0	0	0	1	0	0	0	0
ANKRD24__chr19	0	0	0	0	0	0	0	0	0	0	0	0	0	0	0	0	0	0	0	0	0	0	0	0	0	0	0	0	0	0	0	0	0	0	0	0	0	0	0	0	0	0	0	0	0	0	0	0	0
ANKRD26P1__chr16	0	0	0	0	0	0	0	0	0	0	0	0	0	0	0	0	0	0	0	0	0	0	0	0	0	0	0	0	0	0	0	0	0	0	0	0	0	0	0	0	0	0	0	0	0	0	0	0	0
ANKRD26P3__chr13	0	0	0	0	0	0	0	0	0	0	0	0	0	0	0	0	0	0	0	0	0	0	0	0	0	0	0	0	0	0	0	0	0	0	0	0	0	0	0	0	0	0	0	0	0	0	0	0	0
ANKRD26__chr10	3	0	3	3	0	0	0	0	0	1	0	0	2	0	0	0	0	3	0	0	1	3	0	0	5	0	2	0	1	0	0	0	1	1	0	0	0	0	0	0	0	0	0	5	2	0	2	0	0
ANKRD27__chr19	5	0	1	4	7,01	1	0	0	1	1	0	1	1	0	0	0	0	0	0	1	2	1	0	0	1	0	0	0	0	4	0	0	2	0	0	0	0	0	0	0	0	0	0	1	0	0	3	1	2
ANKRD28__chr3	14,02	0	0	7,01	5	5	3	0	5	1	3	0	1	1	0	3	0	0	0	6	1	2	0	0	11,01	0	2	2	0	4	3	0	9,01	1	0	0	0	0	0	0	0	0	0	6	4	2	3	2	12,02
ANKRD29__chr18	0	0	0	0	0	0	0	0	0	0	0	0	0	0	0	0	0	0	0	0	0	0	0	0	0	0	0	0	0	0	0	0	0	0	0	0	0	0	0	0	0	0	0	0	0	0	0	0	0
ANKRD2__chr10	0	0	0	0	0	0	0	0	0	0	0	0	0	0	0	0	0	0	0	0	0	0	0	0	0	0	0	0	0	0	0	0	0	0	0	0	0	0	0	0	0	0	0	0	0	0	0	1	0
ANKRD30BL__chr2	0	0	0	0	2	0	1	0	0	0	0	0	0	0	0	0	0	0	0	2	2	1	0	0	0	0	0	0	0	0	0	0	0	0	0	0	0	0	0	0	0	0	0	0	0	1	1	0	0
ANKRD30BP2__chr21	0	0	0	0	0	0	0	0	0	0	0	0	0	0	0	0	0	0	0	0	0	1	0	0	1	0	0	0	0	0	0	0	0	0	0	0	0	0	0	0	0	0	0	1	0	0	0	0	0
ANKRD32__chr5	1	0	0	0	0	0	2	0	0	4	1	0	0	0	0	1	0	0	0	1	3	2	0	0	3	0	0	0	0	0	1	0	0	0	0	0	0	0	0	0	0	0	0	0	0	0	0	0	2
ANKRD33B__chr5	0	0	0	0	0	0	0	0	1	0	0	0	0	0	0	0	0	0	0	2	2	0	0	0	0	0	0	0	0	0	0	0	0	1	0	0	1	0	0	0	0	0	0	0	0	0	0	1	0
ANKRD34A__chr1	0	0	0	1	0	0	1	0	0	0	1	0	0	0	0	0	0	2	0	0	0	1	0	0	0	0	0	0	0	0	1	0	0	1	0	0	0	0	0	0	0	0	0	0	1	0	0	2	0
ANKRD34B__chr5	0	0	0	0	0	0	0	0	0	0	0	0	0	0	0	0	0	0	0	0	0	0	0	0	0	0	0	0	0	0	0	0	0	0	0	0	0	0	0	0	0	0	0	0	0	0	0	0	0
ANKRD36BP1__chr1	0	0	0	0	0	0	0	0	1	0	0	0	0	1	0	0	0	0	0	0	0	0	0	0	0	0	0	0	0	0	0	0	0	0	0	0	0	0	0	0	0	0	0	0	0	0	0	0	0
ANKRD36B__chr2	3	0	0	0	0	0	0	0	0	4	0	0	0	2	0	0	0	1	0	0	0	1	0	0	2	0	0	0	0	0	0	0	1	2	0	0	0	0	0	0	0	0	0	1	0	0	0	0	2
ANKRD36__chr2	1	0	1	0	0	0	0	0	0	0	0	0	0	0	0	0	0	0	0	0	0	0	0	0	0	0	0	0	0	0	0	0	0	0	0	0	0	0	0	0	0	0	0	0	0	0	0	0	0
ANKRD37__chr4	1	0	0	0	0	0	0	0	0	1	1	0	0	1	0	0	0	0	0	1	0	0	0	0	0	0	0	0	0	0	0	0	1	0	0	0	0	0	0	0	0	0	0	0	1	0	0	0	0
ANKRD39__chr2	0	0	1	5	1	1	0	0	1	3	0	0	0	0	0	1	0	0	0	0	1	0	0	0	1	0	0	0	0	1	1	0	0	0	0	0	0	0	0	0	0	0	0	0	1	0	1	0	3
ANKRD40__chr17	12,02	0	2	5	5	1	2	0	3	7,01	5	0	2	0	0	2	0	4	0	8,01	3	5	0	0	5	0	1	4	4	4	5	0	6	1	1	0	0	0	0	0	0	0	0	4	4	3	0	5	11,01
ANKRD42__chr11	0	0	0	0	1	0	0	0	0	0	0	0	0	0	0	0	0	0	0	0	0	0	0	0	0	0	0	0	0	0	0	0	0	0	0	0	0	0	0	0	0	0	0	0	0	0	0	1	0
ANKRD44__chr2	1	0	0	0	3	0	0	0	0	0	0	0	1	0	0	1	0	1	0	0	0	0	0	0	0	0	0	0	0	0	0	0	1	2	0	0	0	0	0	0	0	0	0	1	1	0	0	0	0
ANKRD45__chr1	0	0	1	0	0	0	0	0	0	0	0	0	0	0	0	0	0	0	0	0	1	0	0	0	0	0	0	0	0	0	0	0	0	1	0	0	0	0	1	0	0	0	0	0	0	0	0	0	0
ANKRD46__chr8	1	0	0	1	0	2	0	0	0	1	0	0	0	1	0	0	0	1	0	0	1	0	0	0	0	0	0	1	0	2	0	0	0	2	0	0	0	0	0	0	0	0	0	1	0	1	1	0	0
ANKRD49__chr11	1	0	1	1	1	0	0	0	2	0	0	0	1	0	0	1	0	0	0	1	0	3	0	0	1	0	0	0	0	0	1	0	1	0	0	0	0	0	0	0	0	0	0	0	0	0	0	1	0
ANKRD50__chr4	6	0	1	3	5	2	2	0	5	5	6	0	0	0	0	1	0	1	0	6	2	3	0	0	10,01	0	0	0	2	0	1	0	7,01	1	0	0	0	0	0	0	0	0	0	0	4	3	1	4	1
ANKRD52__chr12	11,01	0	1	10,01	1	4	2	0	11,01	4	4	0	4	4	0	2	0	3	0	5	10,01	13,02	0	0	19,04	0	3	4	1	1	3	0	10,01	0	1	0	0	0	0	0	0	0	0	2	5	2	1	3	7,01
ANKRD53__chr2	0	0	0	0	0	0	0	0	0	0	0	0	0	0	0	1	0	0	0	0	0	0	0	0	0	0	0	0	0	0	0	0	0	0	0	0	0	0	0	0	0	0	0	0	0	0	0	0	0
ANKRD54__chr22	0	0	0	0	1	0	0	0	0	0	0	0	1	0	0	2	0	1	0	0	2	1	0	0	2	0	0	0	0	0	2	0	0	0	0	0	0	0	0	0	0	0	0	1	0	0	1	1	0
ANKRD61__chr7	0	0	0	0	0	0	0	0	0	0	0	0	0	0	0	0	0	0	0	0	0	0	0	0	0	0	0	0	0	0	0	0	0	0	0	0	0	0	0	0	0	0	0	0	0	0	0	0	0
ANKRD62P1-PARP4P3__chr22	0	0	0	1	0	0	0	0	0	0	0	0	0	0	0	0	0	0	0	0	0	0	0	0	0	0	0	0	0	0	0	0	0	0	0	0	0	0	0	0	0	0	0	0	0	0	0	0	0
ANKRD65__chr1	0	0	0	0	0	0	0	0	0	0	0	0	0	0	0	1	0	0	0	0	0	0	0	0	0	0	0	0	0	0	0	0	0	0	0	0	0	0	0	0	0	0	0	0	0	1	0	0	0
ANKRD6__chr6	0	0	0	0	0	0	0	0	0	0	0	0	0	0	0	0	0	0	0	0	0	0	0	0	0	0	0	0	0	0	0	0	0	0	0	0	0	0	0	0	0	0	0	0	0	0	0	0	0
ANKRD7__chr7	0	0	0	0	0	0	0	0	0	0	0	0	0	0	0	0	0	0	0	0	0	0	0	0	0	0	0	0	0	0	0	0	0	0	0	0	0	0	0	0	0	0	0	0	0	0	0	0	0
ANKRD9__chr14	3	0	0	1	1	0	1	0	3	4	0	0	1	2	0	1	0	1	0	0	1	8,01	0	0	2	0	0	1	0	0	4	0	2	0	0	0	0	0	0	0	0	0	0	4	0	0	2	1	0
ANKS1A__chr6	2	0	0	0	3	0	0	0	1	0	0	0	1	2	0	0	0	1	0	4	0	1	0	0	0	0	0	1	0	0	0	0	1	0	0	0	0	0	0	0	0	0	0	0	0	0	0	0	0
ANKS1B__chr12	0	0	0	0	0	0	0	0	0	0	0	0	0	0	0	0	0	0	0	0	0	0	0	0	0	0	0	0	0	0	0	0	0	0	0	0	0	0	0	0	0	0	0	0	0	0	0	0	0
ANKS3__chr16	0	0	0	0	0	1	0	0	0	0	1	0	0	0	0	1	0	0	0	1	0	1	0	0	1	0	0	0	0	0	1	0	0	0	0	0	0	0	0	0	0	0	0	0	1	0	0	1	0
ANKS4B__chr16	0	0	0	0	0	0	0	0	0	0	0	0	0	0	0	0	0	0	0	0	0	0	0	0	0	0	0	0	0	0	0	0	0	0	0	0	0	0	0	0	0	0	0	0	0	0	0	0	0
ANKS6__chr9	1	0	2	0	2	1	0	0	1	0	0	0	0	0	0	0	0	1	0	2	0	0	0	0	1	0	0	0	0	0	1	0	1	0	0	0	0	0	0	0	0	0	0	0	0	1	2	1	1
ANKZF1__chr2	0	0	1	0	3	0	0	0	3	3	1	0	0	2	0	0	0	0	0	2	0	0	0	0	0	0	0	0	0	2	0	0	0	0	0	0	0	0	0	0	0	0	0	0	1	0	0	0	0
ANLN__chr7	41,2	0	2	31,11	16,03	0	1	0	73,65	24,07	0	0	2	2	0	14,02	0	0	0	2	10,01	42,21	0	0	54,35	1	2	4	2	4	6	0	43,22	1	0	0	1	0	0	0	0	0	0	0	1	12,02	12,02	0	54,35
ANO10__chr3	1	0	1	3	1	2	1	0	4	3	0	0	0	0	0	0	0	0	0	1	0	6	0	0	3	0	0	1	0	2	3	0	2	1	0	0	0	0	0	0	0	0	0	3	6	1	4	1	1
ANO2__chr12	0	0	0	0	0	0	0	0	0	0	0	0	0	0	0	0	0	0	0	0	0	0	0	0	0	0	0	0	0	0	0	0	0	0	0	0	0	0	0	0	0	0	0	0	0	0	0	0	0
ANO5__chr11	0	0	0	0	0	0	0	0	0	0	0	0	0	0	0	0	0	0	0	0	0	0	0	0	0	0	0	0	0	0	0	0	0	0	0	0	0	0	0	0	0	0	0	0	0	0	0	0	0
ANO6__chr12	5	0	2	5	8,01	8,01	1	0	5	6	3	0	2	5	0	3	0	2	0	9,01	3	5	0	0	5	0	0	3	0	4	3	0	3	1	0	0	0	0	0	0	0	0	0	5	4	1	1	5	4
ANO7__chr2	0	0	0	0	0	1	0	0	0	0	0	0	0	0	0	0	0	0	0	0	0	0	0	0	1	0	0	0	0	0	0	0	0	0	0	0	0	0	0	0	0	0	0	1	0	0	0	0	0
ANO8__chr19	0	0	0	0	0	0	1	0	1	0	0	0	1	0	0	0	0	0	0	0	0	1	0	0	2	0	0	1	0	1	0	0	3	0	0	0	0	0	0	0	0	0	0	1	1	0	1	1	2
ANP32A-IT1__chr15	0	0	0	0	0	0	0	0	0	0	0	0	0	0	0	0	0	0	0	0	0	0	0	0	0	0	0	0	0	0	0	0	1	0	0	0	0	0	0	0	0	0	0	0	0	0	0	0	0
ANP32A__chr15	11,01	0	2	12,02	8,01	4	3	0	17,03	12,02	4	0	4	3	0	6	0	6	0	9,01	9,01	14,02	0	0	8,01	0	2	3	4	7,01	3	0	9,01	5	0	0	0	0	1	0	0	0	0	4	2	5	6	6	10,01
ANP32B__chr9	32,12	1	12,02	59,42	34,14	19,04	5	0	45,24	44,23	19,04	1	21,05	12,02	0	28,09	0	19,04	0	38,17	47,27	33,13	1	0	41,2	0	4	15,03	4	9,01	43,22	0	56,38	20,05	0	0	1	0	1	2	1	0	1	7,01	11,01	30,11	22,06	16,03	30,11
ANP32C__chr4	0	0	0	0	0	0	0	0	0	0	0	0	0	0	0	0	0	0	0	0	0	0	0	0	0	0	0	0	0	0	0	0	0	0	0	0	0	0	0	0	0	0	0	0	0	0	0	0	0
ANP32E__chr1	13,02	0	3	10,01	12,02	2	1	0	25,07	13,02	4	0	7,01	1	0	9,01	0	7,01	0	7,01	8,01	19,04	0	0	18,04	0	0	8,01	0	3	7,01	0	21,05	9,01	0	0	0	0	0	0	0	0	1	3	1	8,01	11,01	3	17,03
ANPEP__chr15	0	0	4	14,02	3	19,04	0	0	3	8,01	4	0	7,01	0	0	8,01	0	6	0	1	8,01	4	0	0	0	0	2	2	1	3	3	0	16,03	6	0	0	0	0	0	0	0	0	1	1	5	2	3	2	4
ANTXR1__chr2	15,03	0	3	9,01	6	4	5	0	13,02	4	9,01	0	2	5	0	6	0	7,01	0	13,02	7,01	9,01	0	0	16,03	0	3	0	1	10,01	12,02	0	10,01	2	0	0	0	0	1	0	0	0	0	14,02	9,01	3	1	6	10,01
ANTXR2__chr4	7,01	0	1	13,02	4	4	5	0	5	6	6	0	1	3	0	4	0	8,01	0	10,01	4	38,17	0	0	13,02	0	10,01	4	1	6	1	0	11,01	4	0	1	1	0	0	0	0	0	0	8,01	3	4	7,01	4	20,05
ANXA10__chr4	0	0	0	0	0	0	0	0	0	0	0	0	0	0	0	0	0	0	0	0	0	4	0	0	0	0	0	0	0	0	0	0	0	0	0	0	0	0	0	0	0	0	0	0	0	0	0	0	0
ANXA11__chr10	10,01	0	12,02	18,04	11,01	12,02	5	0	17,03	12,02	9,01	0	5	8,01	0	4	0	9,01	0	24,07	7,01	8,01	0	1	16,03	0	6	0	4	8,01	6	0	17,03	9,01	0	0	0	0	1	0	1	0	0	10,01	4	10,01	11,01	9,01	24,07
ANXA1__chr9	46,25	0	20,05	43,22	35,15	28,09	17,03	0	66,53	42,21	15,03	0	34,14	22,06	0	24,07	0	32,12	0	42,21	33,13	30,11	0	0	40,19	0	9,01	20,05	5	16,03	26,08	0	64,5	25,07	0	0	0	0	1	0	0	0	0	28,09	36,15	17,03	22,06	34,14	47,27
ANXA2P1__chr4	0	0	0	0	1	0	0	0	2	0	0	0	1	0	0	0	0	0	0	2	0	1	0	0	1	0	0	0	0	0	0	0	1	0	0	0	0	0	0	0	0	0	0	2	0	0	0	0	0
ANXA2P2__chr9	0	0	2	5	1	3	1	0	2	0	4	0	0	0	0	1	0	1	0	1	3	1	0	0	0	0	1	0	0	0	1	0	0	1	0	0	0	0	0	0	0	0	0	0	0	2	1	2	0
ANXA2P3__chr10	0	0	0	1	0	0	0	0	0	0	0	0	0	0	0	0	0	0	0	0	0	1	0	0	0	0	0	0	0	0	1	0	0	0	0	0	0	0	0	0	0	0	0	0	0	0	0	0	0
ANXA2R__chr5	0	0	0	0	0	0	0	0	0	0	0	0	0	0	0	0	0	0	0	0	0	0	0	0	0	0	0	0	0	0	0	0	0	0	0	0	0	0	0	0	0	0	0	0	0	0	0	0	0
ANXA2__chr15	223,99	1	96,11	413,1	243,04	190,33	101,23	1	262,18	252,6	133,12	1	131,06	159,03	0	161,11	0	141,4	0	260,05	222,93	216,6	0	0	231,39	3	26,08	61,45	33,13	128,99	199,77	1	352,72	133,12	2	1	0	2	0	1	0	2	5	186,14	150,72	153,83	88,95	130,03	260,05
ANXA3__chr4	4	0	0	4	4	4	0	0	2	6	0	0	0	1	0	3	0	1	0	3	2	0	0	0	2	0	0	1	0	1	2	0	0	2	0	0	0	0	0	0	0	0	0	0	3	1	0	1	4
ANXA4__chr2	6	0	5	4	5	8,01	3	0	7,01	4	5	0	2	4	0	4	0	4	0	8,01	3	7,01	0	0	3	0	0	1	3	3	4	0	5	1	0	0	0	0	0	0	0	0	0	5	7,01	5	3	3	6
ANXA5__chr4	190,33	1	59,42	168,39	124,87	98,16	50,3	1	142,43	85,88	44,23	1	66,53	84,86	2	72,63	1	78,74	0	160,07	123,84	117,66	0	1	173,61	1	24,07	38,17	51,31	82,82	107,38	1	146,57	64,5	3	1	3	0	1	4	3	0	7,01	106,36	78,74	99,18	48,28	75,69	183,01
ANXA6__chr5	17,03	0	12,02	43,22	15,03	19,04	8,01	0	23,06	17,03	10,01	1	8,01	12,02	0	13,02	1	10,01	0	17,03	21,05	20,05	1	0	13,02	0	10,01	9,01	8,01	14,02	8,01	0	21,05	4	0	0	1	0	1	0	0	0	2	23,06	9,01	15,03	10,01	13,02	29,1
ANXA7__chr10	13,02	0	7,01	16,03	6	4	3	0	16,03	14,02	4	0	3	7,01	0	8,01	0	6	0	15,03	7,01	17,03	0	0	6	0	5	4	1	3	9,01	0	14,02	3	0	0	0	0	1	0	0	0	0	6	2	9,01	9,01	5	8,01
ANXA9__chr1	0	0	0	0	0	0	0	0	0	0	0	0	0	0	0	1	0	0	0	0	0	0	0	0	0	0	0	0	0	0	0	0	0	0	0	0	0	0	0	0	0	0	0	0	1	0	0	0	0
AOAH__chr7	0	0	0	0	0	0	0	0	0	0	0	0	0	0	0	0	0	0	0	0	0	0	0	0	0	0	1	0	0	0	0	0	0	0	0	0	0	0	0	0	0	0	0	0	0	0	0	0	0
AOC2__chr17	0	0	0	1	0	0	0	0	0	0	0	0	0	0	0	0	0	0	0	0	0	0	0	0	0	0	0	0	0	0	0	0	0	0	0	0	0	0	0	0	0	0	0	0	0	0	0	0	0
AOC3__chr17	0	0	0	0	0	0	0	0	0	0	0	0	0	0	0	0	0	0	0	0	0	0	0	0	0	0	0	0	0	0	0	0	0	0	0	0	0	0	0	0	0	0	0	0	0	0	0	0	0
AOC4__chr17	0	0	0	0	0	0	0	0	0	0	0	0	0	0	0	0	0	0	0	0	0	0	0	0	0	0	0	0	0	0	0	0	0	0	0	0	0	0	0	0	0	0	0	0	0	0	0	0	0
AOX1__chr2	1	0	0	3	0	0	0	0	4	6	2	0	0	2	0	0	0	1	0	0	4	0	0	0	2	0	0	0	0	0	1	0	3	1	0	0	0	0	1	0	0	0	0	1	0	0	0	3	0
AP1AR__chr4	0	0	2	1	1	1	0	0	3	0	0	0	0	0	0	0	0	0	0	0	1	2	0	0	1	0	1	0	0	1	0	0	1	0	0	0	0	0	0	0	0	0	1	0	1	1	1	0	0
AP1B1__chr22	5	0	0	5	2	1	0	0	3	1	4	0	4	2	0	4	0	1	0	2	4	8,01	1	0	8,01	0	2	2	0	3	11,01	0	6	3	0	0	0	0	0	1	0	0	0	4	4	3	3	1	2
AP1G1__chr16	8,01	0	0	4	1	9,01	3	0	5	7,01	2	0	2	4	0	6	0	5	0	6	1	5	0	0	5	0	2	4	2	3	3	0	4	2	0	0	0	1	0	0	0	0	1	2	7,01	4	0	4	8,01
AP1G2__chr14	0	0	0	0	0	0	0	0	1	1	0	0	0	1	0	1	0	0	0	1	0	0	0	0	1	0	0	0	0	0	1	0	0	1	0	0	0	0	0	0	0	0	0	1	0	0	1	0	2
AP1M1__chr19	7,01	0	3	14,02	4	8,01	0	0	22,06	1	10,01	0	1	4	0	12,02	0	4	0	4	9,01	5	0	0	8,01	0	0	2	3	2	7,01	0	17,03	3	1	0	0	0	0	0	0	0	1	5	3	5	1	4	13,02
AP1M2__chr19	5	0	0	2	0	2	0	0	13,02	6	1	0	0	0	0	3	0	4	0	2	4	0	0	0	7,01	0	0	1	1	0	3	0	1	0	0	0	0	0	0	0	0	0	0	1	1	2	0	0	2
AP1S1__chr7	1	0	0	2	0	2	0	0	2	2	0	0	0	0	0	0	0	2	0	1	1	2	0	0	0	1	0	0	1	0	0	0	0	0	0	0	0	0	0	0	0	0	0	1	1	0	2	0	3
AP1S2__chrX	3	0	3	7,01	5	4	1	0	3	1	3	0	3	5	0	5	0	5	0	4	3	5	0	0	4	0	1	1	2	1	3	0	5	0	0	0	0	0	0	0	0	0	0	5	2	2	1	2	5
AP1S3__chr2	0	0	0	0	0	0	0	0	3	0	0	0	1	2	0	0	0	1	0	2	1	1	0	0	2	0	0	1	1	0	0	0	1	1	0	0	0	0	0	0	1	0	0	0	2	1	0	0	0
AP2A1__chr19	0	0	0	0	0	0	0	0	0	0	0	0	0	1	0	0	0	0	0	0	1	0	0	0	2	0	0	0	0	0	0	0	0	0	0	0	0	0	0	0	0	0	0	0	0	0	0	0	1
AP2A2__chr11	8,01	0	1	11,01	9,01	1	1	0	7,01	3	3	0	5	2	0	6	0	1	0	6	2	7,01	0	0	10,01	0	0	2	2	3	1	0	7,01	2	0	0	0	0	0	0	0	0	0	6	3	6	4	7,01	6
AP2B1__chr17	11,01	0	2	18,04	11,01	11,01	3	0	14,02	17,03	15,03	0	7,01	8,01	0	7,01	0	6	0	6	8,01	3	0	0	7,01	0	2	3	2	4	6	0	28,09	2	0	0	0	0	1	1	0	0	0	5	8,01	6	4	7,01	16,03
AP2M1__chr3	26,08	1	16,03	56,38	21,05	38,17	16,03	0	57,39	36,15	33,13	0	18,04	27,09	0	34,14	0	33,13	0	42,21	28,09	48,28	0	0	37,16	0	13,02	6	7,01	28,09	20,05	0	45,24	17,03	0	0	1	0	2	0	0	0	2	28,09	30,11	32,12	8,01	17,03	46,25
AP2S1__chr19	24,07	0	7,01	25,07	17,03	20,05	12,02	0	37,16	20,05	14,02	0	13,02	14,02	0	24,07	0	21,05	0	24,07	13,02	36,15	0	0	14,02	0	7,01	10,01	5	6	33,13	0	26,08	12,02	1	0	1	1	2	0	0	0	3	22,06	18,04	17,03	9,01	14,02	22,06
AP3B1__chr5	14,02	0	2	18,04	5	3	1	0	23,06	7,01	9,01	0	2	4	0	5	0	3	0	13,02	11,01	10,01	0	0	20,05	0	6	3	2	1	6	0	6	3	1	0	0	1	1	0	0	0	2	10,01	12,02	4	4	3	15,03
AP3B2__chr15	0	0	0	0	0	0	0	0	0	0	0	0	0	0	0	0	0	0	0	0	0	0	0	0	0	0	0	0	0	0	0	0	0	0	0	0	0	0	0	0	0	0	0	0	0	0	0	0	0
AP3D1__chr19	8,01	0	5	7,01	10,01	3	1	0	10,01	11,01	5	0	3	9,01	0	9,01	0	4	0	11,01	8,01	19,04	0	0	8,01	0	2	1	3	8,01	10,01	0	2	2	1	0	0	0	0	2	0	0	0	4	5	2	3	4	9,01
AP3M1__chr10	18,04	0	3	15,03	6	4	1	0	13,02	20,05	10,01	0	2	7,01	0	13,02	1	14,02	0	7,01	5	23,06	0	0	9,01	0	2	4	1	7,01	18,04	0	7,01	4	0	0	0	0	0	1	0	0	0	7,01	5	11,01	6	5	14,02
AP3M2__chr8	2	0	0	2	3	0	0	0	0	0	1	0	0	0	0	2	0	1	0	1	1	2	0	0	0	0	0	2	0	0	0	0	5	1	0	0	0	0	0	0	0	1	0	0	2	1	0	0	1
AP3S1__chr5	13,02	0	2	17,03	10,01	12,02	3	0	14,02	9,01	5	0	6	8,01	0	13,02	0	8,01	0	14,02	10,01	11,01	0	0	10,01	0	1	7,01	0	5	7,01	0	21,05	5	0	0	0	0	0	0	0	0	1	3	5	7,01	9,01	5	8,01
AP4B1-AS1__chr1	0	0	0	0	0	0	0	0	0	0	0	0	0	0	0	0	0	0	0	0	0	0	0	0	0	0	0	0	0	0	0	0	0	0	0	0	0	0	0	0	0	0	0	0	0	0	0	0	0
AP4B1__chr1	5	0	0	8,01	6	3	1	0	1	2	1	0	1	0	0	0	0	3	0	0	1	4	0	1	1	0	0	0	0	2	4	0	7,01	2	0	0	0	0	0	0	0	0	0	0	1	3	5	0	4
AP4E1__chr15	2	0	0	0	0	1	0	0	1	0	2	0	1	1	0	0	0	0	0	2	2	1	0	0	4	0	0	0	0	0	2	0	4	2	0	0	0	0	0	0	0	0	0	0	0	0	1	3	0
AP4M1__chr7	0	0	1	0	0	1	0	0	1	0	0	0	0	0	0	0	0	0	0	0	1	0	0	0	1	0	1	0	0	1	0	0	0	1	0	0	0	0	0	0	0	0	0	0	0	0	0	1	0
AP4S1__chr14	3	0	2	0	0	0	0	0	5	3	0	0	2	0	0	1	0	1	0	0	0	1	0	0	1	0	1	0	0	1	0	0	3	1	0	0	0	0	1	0	0	0	0	3	1	0	0	4	1
AP5B1__chr11	0	0	0	7,01	1	0	0	0	2	2	1	0	1	0	0	0	0	1	0	0	1	5	0	0	2	0	0	0	0	1	0	0	1	1	0	0	0	0	0	0	0	0	0	2	0	0	1	0	1
AP5M1__chr14	2	0	0	1	1	1	0	0	1	1	0	0	1	2	0	0	0	0	0	2	0	1	0	0	0	0	0	1	0	1	0	0	3	0	0	0	0	0	0	0	0	0	0	0	0	0	2	1	3
AP5S1__chr20	1	0	2	2	2	0	0	0	1	0	0	0	1	5	0	0	0	1	0	2	2	1	0	0	2	0	0	0	0	1	0	0	1	0	0	0	0	0	0	0	0	0	0	0	0	0	0	0	1
AP5Z1__chr7	2	0	1	1	1	0	0	0	0	0	0	1	0	0	0	1	0	0	0	1	0	0	0	0	0	0	1	0	0	0	0	0	1	0	0	0	0	0	0	0	0	0	0	0	1	0	0	0	0
APAF1__chr12	0	0	0	2	0	0	0	0	0	0	0	0	0	0	0	0	0	0	0	0	0	0	0	0	2	0	0	0	0	0	0	0	0	0	0	0	0	0	0	0	0	0	0	0	0	0	0	0	0
APBA1__chr9	0	0	0	0	0	0	0	0	0	0	0	0	0	0	0	0	0	0	0	0	0	0	0	0	0	0	0	0	0	0	0	0	0	0	0	0	0	0	0	0	0	0	0	0	0	0	0	0	0
APBA2__chr15	1	0	0	0	0	1	0	0	1	1	0	0	0	1	0	0	0	0	0	4	1	0	0	0	0	0	1	1	0	1	0	0	4	0	0	0	0	0	0	0	0	0	0	2	1	0	0	0	1
APBA3__chr19	0	0	0	1	0	0	0	0	0	1	0	0	1	0	0	0	0	4	0	1	0	1	0	0	0	0	0	0	0	0	0	0	3	0	0	0	0	0	0	0	0	0	0	0	1	0	0	2	1
APBB1IP__chr10	0	0	0	0	0	0	0	0	0	0	0	0	0	0	0	0	0	0	0	0	0	0	0	0	0	0	0	0	0	0	0	0	0	0	0	0	0	0	0	0	0	0	0	0	0	0	0	0	0
APBB1__chr11	0	0	1	4	1	1	1	0	2	1	0	0	1	7,01	0	1	0	0	0	1	2	1	0	0	5	0	0	0	2	1	1	1	1	0	0	0	0	0	0	0	0	0	0	1	4	0	0	2	2
APBB2__chr4	7,01	0	0	4	5	5	1	0	3	1	3	0	4	4	0	1	0	5	0	4	3	0	0	0	7,01	0	3	2	0	2	1	0	6	5	0	0	0	0	0	0	0	0	0	1	4	5	0	2	12,02
APBB3__chr5	3	0	3	2	1	5	2	0	2	1	5	0	0	1	0	0	0	1	0	4	4	1	0	0	0	0	1	0	1	7,01	1	0	0	1	0	0	0	0	0	0	0	0	0	1	3	0	0	1	1
APC2__chr19	0	0	0	0	1	0	0	0	0	0	0	0	0	0	0	0	0	0	0	0	0	0	0	0	0	0	0	0	0	0	0	0	0	0	0	0	0	0	0	0	0	0	0	0	0	0	0	0	0
APCDD1L-AS1__chr20	0	0	0	0	0	0	0	0	0	0	0	0	0	0	0	0	0	0	0	1	0	0	0	0	0	0	0	0	0	0	0	0	0	0	0	0	0	0	0	0	0	0	0	2	0	0	0	0	0
APCDD1L__chr20	0	0	0	0	0	0	0	0	0	0	0	0	0	0	0	0	0	0	0	0	0	0	0	0	0	0	0	0	0	0	0	0	0	0	0	0	0	0	0	0	0	0	0	1	0	0	0	1	0
APCDD1__chr18	0	0	0	0	0	0	0	0	0	0	0	0	0	0	0	0	0	0	0	0	0	0	0	0	0	0	0	0	0	0	0	0	0	0	0	0	0	0	0	0	0	0	0	0	0	0	0	0	0
APC__chr5	4	0	1	3	2	1	2	0	3	5	0	0	2	2	0	0	0	0	0	5	2	3	0	0	4	0	2	0	0	1	2	0	3	0	0	0	0	0	0	0	0	0	0	0	3	0	0	0	0
APEH__chr3	4	0	1	5	4	3	2	0	4	4	1	0	0	4	0	5	0	2	0	1	2	2	0	0	5	0	1	0	0	1	4	0	2	6	0	0	0	0	0	0	0	0	0	3	0	1	0	5	2
APEX1__chr14	27,09	0	14,02	35,15	21,05	24,07	17,03	0	45,24	21,05	14,02	0	25,07	17,03	0	16,03	0	20,05	0	26,08	35,15	23,06	0	0	34,14	0	8,01	8,01	3	22,06	32,12	0	48,28	12,02	0	1	1	1	0	0	0	0	1	13,02	12,02	24,07	24,07	13,02	29,1
APEX2__chrX	3	0	2	3	2	2	1	0	6	3	0	0	0	3	0	3	0	4	0	2	3	1	0	0	3	0	0	2	2	2	3	0	14,02	0	0	0	0	0	0	1	0	0	0	0	2	0	1	0	5
APH1A__chr1	0	0	1	5	0	3	0	0	1	4	1	0	0	1	0	6	0	0	0	4	1	2	0	0	0	0	1	3	2	0	1	0	0	0	0	0	0	0	0	0	0	0	0	1	2	2	0	0	0
APH1B__chr15	1	0	0	3	1	2	0	0	2	0	0	0	0	2	0	1	0	0	0	0	0	0	0	0	1	0	1	1	0	0	0	0	0	1	0	0	0	0	0	0	0	0	0	0	2	0	0	1	1
API5__chr11	10,01	0	6	19,04	10,01	5	1	0	14,02	15,03	11,01	0	8,01	6	0	8,01	0	12,02	0	21,05	11,01	13,02	0	0	15,03	0	1	1	5	8,01	11,01	0	13,02	8,01	0	0	0	0	0	1	0	0	4	6	3	6	10,01	3	17,03
APIP__chr11	4	0	1	5	0	0	1	0	8,01	3	1	0	0	0	0	2	0	1	0	0	4	4	0	0	5	0	0	0	0	0	4	0	4	0	0	0	0	0	0	0	0	0	0	0	1	1	2	2	1
APITD1__chr1	0	0	0	3	1	3	0	0	3	3	0	0	0	2	0	1	0	3	0	0	2	1	0	0	3	0	1	0	0	0	3	0	2	0	0	0	0	0	0	0	0	0	0	3	0	0	0	0	5
APLF__chr2	1	0	0	1	0	0	0	0	0	0	0	0	0	0	0	0	0	0	0	0	0	0	0	0	0	0	0	0	1	1	0	0	0	0	0	0	0	0	0	0	0	0	0	0	0	1	0	0	0
APLP1__chr19	6	0	0	6	2	5	4	0	3	2	4	0	2	8,01	0	1	0	1	0	8,01	2	11,01	0	0	4	0	4	1	3	5	1	0	5	1	0	0	0	0	0	0	0	0	3	11,01	8,01	3	1	9,01	5
APLP2__chr11	58,41	0	37,16	52,33	56,38	41,2	42,21	0	80,78	50,3	37,16	0	29,1	97,13	0	58,41	2	34,14	1	116,63	46,25	114,57	2	0	54,35	0	27,09	17,03	24,07	53,34	44,23	1	50,3	22,06	1	1	1	1	3	3	2	1	13,02	74,67	87,93	44,23	25,07	107,38	82,82
APMAP__chr20	8,01	0	9,01	10,01	5	4	9,01	0	13,02	6	3	0	3	8,01	0	7,01	0	10,01	0	7,01	3	16,03	0	0	8,01	0	2	3	0	2	5	0	12,02	5	0	0	0	0	0	1	0	0	0	4	11,01	5	4	6	10,01
APOA1BP__chr1	8,01	0	0	5	5	2	0	0	6	2	4	0	7,01	1	0	1	0	1	0	6	1	2	0	0	2	0	1	2	3	2	2	0	4	2	0	0	0	0	0	0	0	0	0	1	8,01	2	2	1	4
APOBEC3A__chr22	0	0	0	0	0	0	0	0	0	0	0	0	0	0	0	0	0	0	0	0	1	0	0	0	0	0	0	0	0	0	0	0	0	0	0	0	0	0	0	0	0	0	0	0	0	0	0	0	0
APOBEC3B__chr22	0	0	0	1	0	0	0	0	1	1	0	0	1	0	0	0	0	0	0	0	0	1	0	0	0	0	0	0	0	0	0	0	0	0	0	0	0	0	0	0	0	0	0	0	0	1	1	0	1
APOBEC3C__chr22	2	0	0	1	1	0	0	0	3	4	0	0	0	2	0	0	0	1	0	1	2	1	0	0	6	0	2	0	1	0	3	0	4	0	0	0	0	0	0	1	0	0	0	1	2	0	0	1	0
APOBEC3D__chr22	0	0	0	0	0	0	0	0	0	0	0	0	0	0	0	0	0	0	0	0	0	0	0	0	0	0	0	0	0	0	0	0	0	0	0	0	0	0	0	0	0	0	0	0	0	0	0	0	0
APOBEC3F__chr22	0	0	0	0	0	0	0	0	0	0	0	0	0	0	0	0	0	0	0	0	0	0	0	0	0	0	0	0	0	0	0	0	1	0	0	0	0	0	0	0	0	0	0	2	1	0	0	0	0
APOBEC3G__chr22	0	0	0	0	0	0	0	0	0	0	0	0	0	0	0	0	0	0	0	0	0	0	0	0	0	0	0	0	0	0	0	0	0	0	0	0	0	0	0	0	0	0	0	0	0	0	0	0	0
APOBEC3H__chr22	0	0	0	0	0	0	0	0	0	0	0	0	0	0	0	0	0	0	0	0	0	0	0	0	0	0	0	0	0	0	0	0	0	0	0	0	0	0	0	0	0	0	0	0	0	0	0	0	0
APOBR__chr16	0	0	0	0	0	0	0	0	0	0	0	0	0	0	0	0	0	0	0	0	0	0	0	0	0	0	0	0	0	0	0	0	0	0	0	0	0	0	0	0	0	0	0	0	0	0	0	0	0
APOC1P1__chr19	0	0	0	0	0	0	0	0	0	0	0	0	0	0	0	0	0	0	0	0	0	0	0	0	1	0	0	0	0	0	0	0	0	0	0	0	0	0	0	0	0	0	0	0	0	0	0	0	0
APOC1__chr19	1	0	0	0	0	0	0	0	0	0	0	0	0	0	0	0	0	0	0	0	0	0	0	0	0	0	0	0	0	0	0	0	0	0	0	0	0	0	0	0	0	0	0	0	0	0	0	0	0
APOD__chr3	0	0	0	0	0	0	0	0	0	0	0	0	0	0	0	0	0	0	0	0	0	0	0	0	0	0	0	0	0	0	0	0	0	0	0	0	0	0	0	0	0	0	0	0	0	0	0	0	0
APOE__chr19	0	0	0	0	0	0	0	0	0	0	0	0	0	0	0	0	0	0	0	0	0	0	0	0	0	0	0	0	0	0	0	0	0	0	0	0	0	0	0	0	0	0	0	0	0	0	0	0	0
APOL1__chr22	0	0	0	0	0	0	0	0	0	0	0	0	0	1	0	0	0	0	0	0	0	0	0	0	0	0	0	0	0	0	0	0	0	0	0	0	0	0	0	0	0	0	0	0	0	0	0	0	0
APOL2__chr22	1	0	0	0	0	0	2	0	1	0	1	0	3	1	0	0	0	1	0	2	0	0	0	0	0	0	2	0	0	1	1	0	0	0	0	0	0	0	0	0	0	0	0	0	3	2	1	2	0
APOL3__chr22	0	0	0	0	0	0	0	0	0	0	0	0	0	0	0	0	0	0	0	0	0	0	0	0	0	0	0	0	0	0	0	0	0	0	0	0	0	0	0	0	0	0	0	0	0	0	0	0	0
APOL4__chr22	0	0	0	0	0	0	0	0	0	0	0	0	0	0	0	0	0	2	0	0	0	0	0	0	0	0	0	0	1	0	2	0	0	0	0	0	0	0	0	0	0	0	0	0	0	0	1	0	0
APOL6__chr22	0	0	0	1	2	1	0	0	2	0	1	0	0	0	0	0	0	0	0	0	0	0	0	0	0	0	3	0	0	1	2	0	1	0	0	0	1	0	1	0	0	0	0	3	3	1	0	1	1
APOLD1__chr12	8,01	0	1	3	1	1	0	0	4	0	0	0	0	1	0	1	0	2	0	3	0	10,01	0	0	4	0	0	0	0	0	1	0	4	1	0	0	0	0	1	0	0	0	0	4	1	1	0	1	5
APOM__chr6	0	0	0	1	0	1	0	0	0	0	0	0	1	0	0	0	0	0	0	0	0	0	0	0	0	0	0	0	0	0	0	0	0	0	0	0	0	0	0	0	0	0	0	0	1	2	0	1	0
APOOL__chrX	1	0	1	4	3	6	1	0	1	1	1	0	0	1	1	0	0	0	0	0	2	1	0	0	2	0	0	1	0	0	0	0	7,01	1	0	0	0	0	0	0	0	0	0	1	3	0	0	3	1
APOO__chrX	1	0	0	5	2	4	3	0	7,01	3	1	0	1	1	0	0	0	0	0	2	5	2	0	0	3	0	1	0	0	1	1	0	0	0	0	0	0	0	0	0	0	0	0	0	3	0	1	0	3
APOPT1__chr14	1	0	2	2	1	1	0	0	3	2	0	0	2	0	0	2	0	1	0	4	0	3	0	0	1	0	0	1	2	0	2	0	5	0	0	0	0	0	0	0	0	0	0	1	1	0	0	0	4
APPBP2__chr17	3	0	2	2	6	7,01	3	0	2	2	1	0	2	5	0	2	0	3	0	11,01	8,01	2	0	0	1	0	5	3	1	4	4	0	1	1	0	0	0	0	0	0	0	0	1	7,01	6	2	3	7,01	6
APPL1__chr3	5	0	1	0	4	5	1	0	3	6	0	0	1	0	0	1	0	4	0	10,01	3	13,02	0	0	6	0	0	0	0	2	4	0	9,01	1	0	0	0	0	0	0	0	0	0	3	1	1	2	0	2
APPL2__chr12	19,04	0	6	10,01	10,01	7,01	7,01	0	15,03	19,04	9,01	0	2	9,01	1	7,01	0	10,01	0	15,03	9,01	13,02	0	0	26,08	0	2	1	3	11,01	7,01	0	15,03	4	0	0	1	0	0	0	0	0	0	10,01	3	13,02	3	6	13,02
APP__chr21	21,05	0	10,01	13,02	10,01	10,01	4	1	8,01	12,02	6	0	4	15,03	0	6	0	9,01	0	50,3	9,01	35,15	0	0	26,08	0	7,01	2	6	33,13	6	0	18,04	15,03	0	0	0	0	1	0	0	0	1	12,02	13,02	7,01	2	29,1	20,05
APRT__chr16	4	0	0	6	2	2	0	0	3	3	3	0	1	0	0	3	0	3	0	3	2	2	0	0	4	0	1	1	1	1	3	0	3	0	0	0	0	1	0	0	0	0	0	3	3	4	1	2	2
APTX__chr9	4	0	0	3	0	1	0	0	2	4	1	0	3	1	0	1	0	0	0	2	5	1	0	0	3	0	1	1	0	2	2	0	3	1	0	0	0	0	0	0	0	0	0	0	2	3	2	4	5
AQP11__chr11	0	0	0	0	0	2	0	0	0	0	0	0	0	0	0	0	0	0	0	0	0	0	0	0	0	0	0	0	0	0	0	0	1	0	0	0	0	0	0	0	0	0	0	0	0	0	0	0	0
AQP3__chr9	0	0	0	0	0	0	0	0	0	0	0	0	0	0	0	0	0	0	0	0	0	0	0	0	0	0	0	0	0	0	0	0	0	0	0	0	0	0	0	0	0	0	0	0	0	0	0	0	0
AQP6__chr12	0	0	0	0	0	0	0	0	0	0	0	0	0	0	0	0	0	0	0	0	0	0	0	0	0	0	0	0	0	0	0	0	0	0	0	0	0	0	0	0	0	0	0	0	0	0	0	0	0
AQP7P1__chr9	0	0	0	0	0	0	0	0	0	0	0	0	0	0	0	0	0	0	0	0	0	0	0	0	0	0	0	0	0	0	0	0	0	0	0	0	0	0	0	0	0	0	0	0	0	0	0	0	0
AQP7P3__chr9	0	0	0	0	0	0	0	0	0	0	0	0	0	0	0	0	0	0	0	0	0	0	0	0	0	0	0	0	0	0	0	0	0	0	0	0	0	0	0	0	0	0	0	0	0	0	0	0	0
AQP8__chr16	0	0	0	0	0	0	0	0	0	0	0	0	0	0	0	0	0	0	0	0	0	0	0	0	0	0	0	0	0	0	0	0	0	0	0	0	0	0	0	0	0	0	0	0	0	0	0	0	0
AQPEP__chr5	0	0	0	0	0	0	0	0	0	0	0	0	0	0	0	0	0	0	0	0	0	0	0	0	0	0	0	0	0	0	0	0	0	0	0	0	0	0	0	0	0	0	0	0	0	0	0	0	0
AQR__chr15	6	0	0	2	1	2	1	0	2	1	1	0	4	6	0	3	0	1	0	0	1	6	0	0	0	0	2	2	0	0	0	0	7,01	0	0	0	0	0	0	0	0	0	0	1	0	0	1	3	2
ARAF__chrX	3	0	0	7,01	1	2	2	0	2	2	1	0	2	5	0	2	0	0	0	7,01	3	5	0	0	4	0	1	1	1	0	0	0	2	1	0	0	0	0	0	0	0	0	0	1	0	1	0	1	4
ARAP1__chr11	1	0	0	2	0	4	0	0	0	1	0	0	0	1	0	0	0	0	0	1	0	1	0	0	0	0	0	0	0	1	0	0	1	0	0	0	0	0	0	0	0	0	0	0	2	0	1	0	1
ARAP2__chr4	0	0	0	0	0	0	1	0	0	0	1	0	0	2	0	0	0	0	0	0	0	1	0	0	0	0	0	0	0	0	0	0	0	0	0	0	0	0	0	0	0	0	0	0	0	0	0	2	1
ARAP3__chr5	3	0	2	1	0	6	2	0	2	2	0	0	1	4	0	1	0	1	0	2	0	0	0	0	2	0	0	0	1	3	0	0	2	1	0	0	0	0	0	0	0	0	0	3	5	0	0	0	1
ARCN1__chr11	16,03	0	5	24,07	20,05	13,02	5	1	12,02	11,01	9,01	0	13,02	18,04	0	12,02	0	3	0	16,03	16,03	17,03	0	1	23,06	0	2	7,01	7,01	16,03	18,04	0	29,1	13,02	0	1	1	1	0	0	0	0	1	10,01	15,03	10,01	13,02	14,02	21,05
ARF1__chr1	32,12	0	13,02	59,42	22,06	34,14	14,02	0	52,33	45,24	19,04	0	24,07	31,11	0	39,18	0	24,07	1	53,34	33,13	52,33	0	0	40,19	0	6	14,02	8,01	13,02	34,14	0	46,25	17,03	1	1	0	0	0	0	0	0	1	17,03	27,09	25,07	16,03	21,05	38,17
ARF3__chr12	25,07	0	11,01	32,12	21,05	10,01	15,03	0	30,11	16,03	8,01	0	14,02	14,02	0	31,11	0	14,02	0	28,09	27,09	20,05	0	0	42,21	0	7,01	11,01	2	14,02	18,04	0	33,13	17,03	0	0	0	0	1	0	0	1	1	19,04	18,04	25,07	8,01	13,02	31,11
ARF4__chr3	40,19	0	13,02	56,38	51,31	24,07	14,02	0	37,16	37,16	14,02	0	14,02	50,3	0	13,02	0	31,11	0	56,38	26,08	53,34	1	0	37,16	0	11,01	26,08	9,01	32,12	28,09	0	36,15	35,15	0	0	0	0	0	1	0	0	0	42,21	44,23	16,03	25,07	23,06	66,53
ARF5__chr7	5	0	0	4	5	3	2	0	2	3	1	1	3	5	0	4	0	1	0	8,01	2	6	0	0	3	0	2	1	0	2	3	0	3	4	1	0	0	0	0	0	0	0	0	4	3	1	1	1	5
ARF6__chr14	29,1	0	5	6	8,01	16,03	8,01	0	22,06	17,03	10,01	1	7,01	3	0	16,03	0	21,05	0	12,02	14,02	27,09	0	0	22,06	0	7,01	5	8,01	5	10,01	0	32,12	3	0	0	0	0	0	0	0	0	1	4	8,01	12,02	12,02	8,01	37,16
ARFGAP1__chr20	2	0	0	3	1	1	0	0	0	0	2	0	1	1	0	1	0	0	0	5	1	2	0	0	7,01	0	0	1	0	3	0	0	3	2	0	0	0	0	0	0	0	0	0	3	1	2	0	1	0
ARFGAP2__chr11	3	0	2	6	4	1	2	0	2	3	1	0	3	2	0	2	0	2	0	2	3	3	0	0	2	0	0	0	0	4	3	0	4	2	0	0	0	0	0	0	0	0	0	2	2	1	4	3	1
ARFGAP3__chr22	6	0	6	2	7,01	2	1	0	5	6	2	0	1	4	0	4	0	2	0	3	4	9,01	0	0	0	0	1	0	0	1	2	0	6	4	0	0	0	0	0	0	0	0	1	5	3	0	4	4	11,01
ARFGEF1__chr8	3	0	3	5	2	3	1	0	2	2	2	0	0	3	0	0	0	2	0	2	2	1	0	0	1	0	1	0	0	1	2	0	3	5	0	0	0	0	0	0	0	0	0	2	4	3	1	3	3
ARFGEF2__chr20	6	0	4	1	6	4	2	0	3	2	3	0	0	2	0	3	0	3	0	4	2	8,01	0	0	6	0	1	2	1	3	2	0	7,01	2	0	0	0	0	0	0	0	0	0	4	0	0	0	0	5
ARFIP1__chr4	5	0	3	4	6	2	4	0	10,01	7,01	4	0	1	2	0	3	0	2	0	3	2	3	0	0	3	0	5	1	1	7,01	0	0	11,01	4	0	0	1	0	1	0	0	0	0	3	1	4	1	2	0
ARFIP2__chr11	5	0	4	3	3	6	1	0	6	4	2	0	1	1	0	6	0	2	0	2	5	1	0	0	3	0	0	1	1	6	5	0	5	4	0	0	0	0	0	1	0	0	1	10,01	5	5	6	2	3
ARFRP1__chr20	1	0	0	0	1	0	0	0	5	0	0	0	2	0	0	4	0	2	0	0	1	1	0	0	1	0	0	0	0	0	3	0	3	1	0	0	0	0	0	0	0	0	0	0	2	1	0	0	0
ARG2__chr14	2	0	0	0	0	0	0	0	0	0	0	0	0	0	0	0	0	0	0	0	0	2	0	0	0	0	0	0	0	0	0	0	0	0	0	0	0	0	0	0	0	0	0	0	0	0	0	0	0
ARGFX__chr3	0	0	0	0	0	0	0	0	0	0	0	0	0	0	0	0	0	0	0	0	0	1	0	0	0	0	0	0	0	1	0	0	0	0	0	0	0	0	0	0	0	0	1	0	0	0	0	0	0
ARGLU1__chr13	3	0	3	7,01	4	6	5	0	8,01	8,01	6	0	2	3	0	3	0	2	0	7,01	5	4	0	0	2	0	1	0	1	4	8,01	0	9,01	3	0	1	0	2	0	0	0	0	0	2	2	3	4	7,01	9,01
ARHGAP10__chr4	0	0	1	1	1	2	1	0	0	0	0	0	0	0	0	0	0	0	0	2	0	2	0	0	3	0	0	0	0	0	0	0	0	0	0	0	0	0	0	0	0	0	0	0	1	0	0	1	2
ARHGAP11A__chr15	13,02	0	0	4	0	0	0	0	8,01	0	0	0	0	0	0	1	0	0	0	0	3	8,01	0	0	18,04	0	0	3	0	0	2	0	15,03	0	0	0	1	0	1	0	0	0	0	0	0	1	1	0	19,04
ARHGAP11B__chr15	0	0	0	0	0	0	0	0	0	0	0	0	0	0	0	0	0	0	0	0	0	0	0	0	0	0	0	0	0	0	0	0	0	0	0	0	0	0	0	0	0	0	0	0	0	0	0	0	1
ARHGAP12__chr10	3	0	2	3	2	1	8,01	0	8,01	2	0	0	0	5	0	2	0	2	0	5	1	2	0	0	2	0	1	3	0	1	2	0	1	7,01	0	0	1	0	1	0	0	0	0	2	1	1	0	0	0
ARHGAP17__chr16	3	0	2	5	4	2	2	0	2	3	2	0	5	4	0	5	0	4	0	0	5	3	0	0	4	0	1	0	1	1	1	0	10,01	3	0	0	0	0	0	0	0	0	0	2	1	1	0	3	4
ARHGAP18__chr6	9,01	0	5	2	2	7,01	3	0	7,01	6	0	0	2	5	0	3	0	5	1	10,01	3	2	0	0	4	0	2	0	0	3	2	0	10,01	7,01	0	0	0	0	1	0	0	0	0	10,01	12,02	0	0	6	8,01
ARHGAP19__chr10	1	0	0	1	1	0	0	0	4	1	0	0	1	1	0	0	0	1	0	0	0	2	0	0	1	0	0	1	0	1	1	0	1	3	0	0	0	0	0	0	0	0	0	0	0	0	0	0	2
ARHGAP1__chr11	6	0	5	4	7,01	6	5	0	6	6	3	0	6	13,02	0	10,01	0	10,01	0	10,01	11,01	6	1	0	27,09	0	6	2	3	11,01	6	0	9,01	2	0	0	1	0	1	0	1	0	1	5	14,02	5	4	9,01	13,02
ARHGAP21__chr10	6	0	1	7,01	0	2	4	0	9,01	9,01	1	0	2	5	0	5	0	4	0	7,01	0	10,01	0	0	5	0	1	0	2	3	3	0	10,01	1	0	0	0	0	0	0	0	0	0	4	3	2	2	1	7,01
ARHGAP22__chr10	4	0	1	4	2	4	1	0	4	4	4	0	4	3	0	0	0	0	0	2	1	1	0	0	3	0	2	0	0	1	1	0	6	5	0	0	0	0	0	0	0	0	1	4	1	3	1	4	6
ARHGAP23__chr17	11,01	0	9,01	14,02	10,01	10,01	7,01	0	18,04	9,01	5	0	7,01	12,02	0	16,03	0	9,01	0	29,1	12,02	15,03	0	1	5	0	5	2	6	6	12,02	0	14,02	16,03	1	0	0	0	0	0	0	1	0	8,01	10,01	5	5	19,04	9,01
ARHGAP24__chr4	0	0	1	0	0	0	0	0	1	0	0	0	0	1	0	0	0	0	0	0	1	0	0	0	0	0	1	0	1	0	0	0	0	2	0	0	0	0	0	0	0	0	0	0	1	0	0	1	2
ARHGAP26__chr5	4	0	2	0	1	2	0	0	2	0	0	0	0	4	0	0	0	0	0	3	0	1	0	0	0	0	0	0	0	0	0	0	0	1	0	0	0	0	0	0	0	0	0	0	0	0	0	1	0
ARHGAP27__chr17	0	0	0	1	0	2	0	0	0	0	0	0	0	0	0	0	0	0	0	0	0	0	0	0	0	0	0	1	0	2	1	0	0	1	0	0	0	0	0	0	0	0	0	0	0	0	0	1	0
ARHGAP29__chr1	14,02	0	2	13,02	3	9,01	1	0	10,01	18,04	4	0	3	7,01	0	3	0	16,03	0	7,01	10,01	2	0	0	23,06	0	0	3	2	0	6	0	24,07	7,01	1	0	0	0	0	0	0	0	0	0	8,01	0	5	0	16,03
ARHGAP30__chr1	0	0	0	0	0	0	0	0	0	0	0	0	0	0	0	0	0	0	0	0	0	0	0	0	0	0	0	0	0	0	0	0	0	0	0	0	0	0	0	0	0	0	0	0	0	0	0	0	0
ARHGAP31__chr3	1	0	0	2	2	1	0	0	1	2	0	0	0	0	0	0	0	1	0	0	0	2	0	0	0	0	0	1	0	0	0	0	0	2	0	0	0	0	0	0	0	0	0	1	0	2	0	1	0
ARHGAP32__chr11	1	0	1	2	0	1	1	0	2	1	1	0	0	0	0	0	0	0	0	5	1	1	0	0	0	0	1	0	0	0	2	0	0	0	0	0	0	0	0	0	0	0	0	1	0	0	0	0	0
ARHGAP33__chr19	2	0	1	1	1	0	1	0	1	0	0	0	0	1	0	5	0	2	0	1	0	1	0	0	4	0	0	1	1	3	0	0	4	0	0	0	0	0	0	0	0	0	0	1	0	0	0	0	2
ARHGAP35__chr19	6	0	2	5	2	8,01	4	0	7,01	4	2	0	5	5	0	4	0	13,02	0	18,04	9,01	10,01	0	0	10,01	0	0	1	3	5	3	0	11,01	4	0	0	0	0	0	0	0	0	0	8,01	7,01	3	7,01	9,01	6
ARHGAP39__chr8	0	0	1	1	3	0	0	0	0	0	1	0	0	1	0	0	0	0	0	2	0	1	0	0	1	0	0	0	0	2	0	0	1	0	0	0	0	0	0	0	0	0	0	0	2	0	1	0	0
ARHGAP40__chr20	0	0	0	0	0	0	0	0	0	0	0	0	0	0	0	0	0	0	0	0	0	0	0	0	0	0	0	0	0	0	0	0	0	0	0	0	0	0	0	0	0	0	0	0	0	0	0	0	0
ARHGAP42__chr11	0	0	0	0	0	0	0	0	0	0	0	0	0	0	0	0	0	0	0	0	1	0	0	0	0	0	0	0	0	0	0	0	0	0	0	0	0	0	0	0	0	0	0	0	0	0	0	0	0
ARHGAP4__chrX	0	0	0	0	0	0	0	0	0	0	0	0	0	0	0	0	0	0	0	0	0	0	0	0	0	0	0	0	0	0	0	0	0	0	0	0	0	0	0	0	0	0	0	0	0	0	0	0	0
ARHGAP5-AS1__chr14	0	0	0	0	0	0	0	0	0	0	0	0	0	0	0	0	0	0	0	1	0	0	0	0	0	0	0	0	0	0	0	0	0	0	0	0	0	0	0	0	0	0	0	0	1	0	0	0	0
ARHGAP5__chr14	6	0	5	7,01	2	2	3	0	3	5	3	0	3	4	0	1	0	3	0	5	4	3	0	0	3	0	0	4	0	1	3	0	2	2	0	0	0	0	0	0	1	0	0	1	4	1	1	11,01	10,01
ARHGAP6__chrX	0	0	0	0	0	0	0	0	0	0	0	0	0	0	0	0	0	0	0	0	0	0	0	0	0	0	0	0	0	0	0	0	0	0	0	0	0	0	0	0	0	0	0	0	1	0	0	1	0
ARHGAP9__chr12	0	0	0	0	0	0	0	0	0	0	0	0	0	0	0	0	0	0	0	0	0	0	0	0	0	0	0	0	0	0	0	0	0	0	0	0	0	0	0	0	0	0	0	0	0	0	0	0	0
ARHGDIA__chr17	23,06	2	7,01	69,58	26,08	30,11	3	0	63,48	35,15	28,09	0	29,1	9,01	0	31,11	0	14,02	0	23,06	40,19	23,06	0	0	57,39	0	8,01	5	5	13,02	46,25	0	73,65	7,01	0	0	2	0	0	1	0	0	0	11,01	11,01	25,07	16,03	19,04	40,19
ARHGDIB__chr12	1	0	0	3	1	2	0	0	2	3	3	0	0	0	0	2	0	3	0	2	1	3	0	0	5	0	1	3	0	0	1	0	4	0	0	0	0	0	0	0	0	0	0	0	2	0	0	0	12,02
ARHGEF10L__chr1	1	0	0	2	0	1	3	0	0	0	0	0	0	1	0	0	0	0	0	1	0	0	0	0	0	0	0	1	0	0	1	0	3	0	0	0	0	0	0	0	0	0	0	0	1	0	0	0	1
ARHGEF10__chr8	3	0	2	9,01	1	1	4	0	0	4	1	0	1	0	0	4	0	0	0	0	0	5	0	0	1	0	1	2	0	2	5	0	2	0	0	0	0	0	0	0	0	0	0	2	1	2	1	7,01	3
ARHGEF11__chr1	2	0	2	0	2	3	0	0	0	1	0	0	1	0	0	0	0	0	0	2	2	0	0	0	1	0	1	1	2	0	2	0	4	1	0	0	0	0	0	0	0	0	0	1	5	1	0	0	2
ARHGEF12__chr11	13,02	0	7,01	9,01	6	16,03	4	0	10,01	4	5	2	2	5	0	8,01	0	9,01	0	15,03	3	13,02	0	0	6	0	3	6	2	7,01	8,01	0	10,01	1	0	0	0	0	0	0	0	0	1	4	6	6	2	10,01	8,01
ARHGEF17__chr11	0	0	0	1	0	1	1	0	2	0	0	0	0	2	0	0	0	0	0	2	0	1	0	0	1	0	0	0	1	1	1	0	0	0	0	0	0	0	0	0	0	0	0	0	2	0	0	2	1
ARHGEF18__chr19	2	0	0	1	2	0	1	0	2	1	0	0	0	1	0	2	0	1	0	4	0	4	0	0	2	0	0	0	1	5	2	0	0	0	0	0	0	0	0	0	0	0	0	0	1	3	1	0	0
ARHGEF19__chr1	0	0	0	0	0	0	0	0	0	0	0	0	0	0	0	0	0	0	0	0	0	0	0	0	0	0	0	0	0	0	0	0	0	0	0	0	0	0	0	0	0	0	0	0	0	0	0	0	0
ARHGEF1__chr19	1	0	1	4	2	2	1	0	2	0	2	0	3	1	0	5	0	2	0	1	2	1	0	0	3	0	0	0	0	2	1	0	11,01	0	1	1	0	0	0	0	0	0	2	2	0	2	0	2	3
ARHGEF25__chr12	0	0	0	0	0	0	0	0	0	0	0	0	0	0	0	0	0	0	0	1	0	0	0	0	0	0	0	0	0	0	0	0	0	0	0	0	0	0	0	0	0	0	0	0	0	0	0	0	0
ARHGEF26-AS1__chr3	0	0	0	0	0	0	0	0	0	0	0	0	0	0	0	0	0	0	0	0	0	0	0	0	0	0	0	0	0	0	0	0	0	0	0	0	0	0	0	0	0	0	0	0	0	0	0	0	0
ARHGEF26__chr3	2	0	0	0	1	0	0	1	0	0	0	0	0	0	0	1	0	0	0	0	2	0	0	0	0	0	0	1	0	0	1	0	1	1	0	0	0	0	0	0	0	0	0	0	0	1	0	0	0
ARHGEF28__chr5	4	0	4	1	4	4	1	0	5	1	3	0	0	8,01	0	0	0	0	0	9,01	1	3	0	0	3	0	2	0	1	5	3	0	3	3	0	0	0	0	0	1	0	0	0	2	1	0	0	2	14,02
ARHGEF2__chr1	2	0	2	5	6	1	3	0	2	8,01	1	0	2	2	0	4	0	3	0	4	1	3	0	0	6	0	5	1	0	1	0	0	8,01	3	1	0	0	0	0	0	0	0	0	3	8,01	1	5	5	9,01
ARHGEF33__chr2	0	0	0	0	0	0	0	0	0	0	0	0	0	0	0	0	0	0	0	0	0	0	0	0	0	0	0	0	0	0	0	0	0	0	0	0	0	0	0	0	0	0	0	0	0	0	0	0	0
ARHGEF35__chr7	1	0	0	0	1	0	0	0	0	0	0	0	0	1	0	0	0	0	0	0	0	0	0	0	0	0	0	1	0	0	0	0	1	0	0	0	0	0	0	0	0	0	0	1	0	0	0	0	0
ARHGEF37__chr5	0	0	0	0	0	0	0	0	0	0	0	0	0	0	0	0	0	0	0	0	0	0	0	0	0	0	0	0	0	0	0	0	0	0	0	0	0	0	0	0	0	0	0	0	1	0	0	0	0
ARHGEF39__chr9	0	0	1	0	0	0	0	0	0	0	0	0	0	0	0	0	0	0	0	0	0	0	0	0	1	0	0	0	0	0	0	0	1	0	0	0	0	0	0	0	0	0	0	0	0	0	0	0	1
ARHGEF3__chr3	0	0	0	0	1	1	1	0	2	0	0	0	0	1	0	0	0	1	0	0	1	0	0	0	0	0	0	0	0	0	2	0	0	0	0	0	0	0	0	0	0	0	0	2	2	0	0	0	0
ARHGEF40__chr14	5	0	2	3	9,01	7,01	0	0	8,01	3	3	0	2	3	0	5	0	1	0	13,02	8,01	4	0	0	3	0	1	0	1	5	4	0	11,01	3	0	0	0	0	0	0	0	0	1	4	5	0	2	2	2
ARHGEF5__chr7	1	0	0	0	0	0	0	0	0	0	0	0	0	0	0	0	0	0	0	0	0	0	0	0	0	0	1	0	0	0	0	0	0	0	0	0	0	0	0	0	0	0	0	0	0	0	0	2	0
ARHGEF6__chrX	0	0	2	1	0	2	0	0	1	1	0	0	0	0	0	0	0	0	0	3	0	0	0	0	0	0	0	0	0	0	0	0	0	0	0	0	0	0	0	0	0	0	0	0	2	0	0	1	0
ARHGEF7__chr13	0	0	0	0	2	0	2	0	2	0	1	0	1	1	0	2	0	1	0	1	0	4	0	0	2	0	0	0	0	0	1	0	2	0	0	0	0	0	0	0	0	0	1	1	1	1	0	2	5
ARHGEF9__chrX	0	0	0	0	0	0	0	0	0	0	0	0	0	1	0	0	0	2	0	1	2	0	0	0	1	0	0	0	0	0	0	0	0	1	0	0	0	0	1	0	0	0	0	1	3	0	0	0	0
ARID1A__chr1	7,01	0	2	4	4	4	2	0	1	3	5	0	0	4	0	0	0	2	0	9,01	1	1	0	0	2	0	0	0	0	3	2	0	6	1	0	0	0	0	0	0	1	0	0	1	1	5	0	3	15,03
ARID1B__chr6	3	0	5	1	5	2	1	0	2	1	0	0	3	1	0	1	0	1	0	2	4	7,01	0	0	2	0	1	1	1	0	4	0	11,01	1	0	0	1	0	0	0	0	0	0	0	1	0	0	2	2
ARID2__chr12	6	0	0	4	3	3	0	0	11,01	0	2	0	1	4	0	3	0	7,01	0	7,01	1	5	0	0	3	0	4	3	1	5	2	0	2	0	0	0	0	0	0	0	0	0	0	2	2	2	1	4	1
ARID3A__chr19	0	0	0	0	1	0	0	0	0	0	0	0	0	0	0	0	0	0	0	0	0	0	0	0	0	0	0	0	0	0	0	0	0	0	0	0	0	0	0	0	0	0	0	0	2	0	0	0	0
ARID3B__chr15	2	0	2	0	0	0	0	0	2	1	0	0	0	1	0	0	0	1	0	0	1	0	0	0	3	0	0	0	0	0	1	0	0	0	0	0	0	0	0	0	0	0	0	0	0	0	0	1	3
ARID3C__chr9	0	0	0	0	0	0	0	0	0	0	0	0	0	0	0	0	0	0	0	0	0	0	0	0	0	0	0	0	0	0	0	0	0	0	0	0	0	0	0	0	0	0	0	0	0	0	0	0	0
ARID4A__chr14	1	0	6	0	0	0	0	0	2	1	0	0	0	2	0	0	0	1	0	2	1	0	0	0	0	0	2	0	0	1	1	0	0	2	0	0	0	0	0	1	0	0	0	2	0	2	0	0	0
ARID4B__chr1	0	0	6	3	1	4	1	0	2	2	0	0	2	2	0	4	0	3	0	6	4	8,01	0	0	7,01	0	3	0	0	2	0	0	3	0	0	0	0	0	0	0	0	0	0	3	1	3	1	6	3
ARID5A__chr2	2	0	0	0	0	0	0	0	0	0	0	0	0	0	0	4	0	0	0	0	0	0	0	0	2	0	0	0	0	0	0	0	0	0	0	0	0	0	0	0	0	0	0	2	1	2	0	0	0
ARID5B__chr10	3	0	8,01	0	20,05	4	0	0	6	6	5	0	2	1	0	1	0	8,01	0	26,08	1	1	1	0	1	0	2	0	6	2	3	2	5	2	0	0	0	0	0	0	0	0	1	6	2	1	5	7,01	9,01
ARIH1__chr15	3	0	3	1	0	4	2	0	4	2	1	0	4	5	0	7,01	0	1	0	5	5	9,01	0	0	4	1	0	3	2	3	3	0	3	3	0	1	0	0	0	0	0	0	0	3	9,01	3	1	3	2
ARIH2OS__chr3	0	0	0	0	0	0	0	0	0	0	0	0	0	0	0	0	0	0	0	0	0	0	0	0	0	0	0	0	0	0	0	0	0	1	0	0	0	0	0	0	0	0	0	0	0	0	0	0	0
ARIH2__chr3	5	0	3	5	2	4	2	0	6	4	2	0	2	1	0	3	0	4	0	6	3	3	0	0	6	0	4	2	0	1	1	0	6	2	0	0	0	0	0	0	0	0	0	5	2	4	7,01	2	0
ARL11__chr13	0	0	0	0	0	0	0	0	0	0	0	0	0	1	0	0	0	0	0	0	0	0	0	0	0	0	0	0	0	0	0	0	0	0	0	0	0	0	0	0	0	0	0	0	0	0	0	0	0
ARL13B__chr3	0	0	0	3	0	0	0	0	0	0	0	0	0	0	0	0	0	0	0	0	2	0	0	0	1	0	1	0	0	1	2	0	3	1	0	0	0	0	0	0	0	0	0	0	0	1	0	0	2
ARL14EP__chr11	0	0	0	0	0	0	0	0	1	1	1	0	1	0	0	0	0	0	0	0	0	3	0	0	0	0	0	0	0	0	0	0	1	1	0	0	0	0	0	0	0	0	0	1	0	0	0	0	0
ARL14__chr3	0	0	0	0	0	0	0	0	0	0	0	0	0	0	0	0	0	0	0	0	0	0	0	0	0	0	0	0	0	0	0	0	0	0	0	0	0	0	0	0	0	0	0	0	0	0	0	0	0
ARL15__chr5	0	0	0	0	0	0	0	0	0	0	0	0	0	0	0	0	0	0	0	1	0	0	0	0	0	0	0	0	0	0	0	0	0	0	0	0	0	0	0	0	0	0	0	0	1	0	0	0	0
ARL16__chr17	5	0	0	7,01	2	2	0	0	3	4	2	0	1	1	0	2	0	2	0	0	0	0	0	0	4	0	0	0	2	0	4	0	3	0	0	0	0	0	0	0	0	0	0	2	4	3	1	0	2
ARL17A__chr17	0	0	0	0	0	0	0	0	0	0	0	0	0	0	0	0	0	0	0	0	0	0	0	0	0	0	0	0	0	0	0	0	0	0	0	0	0	0	0	0	0	0	0	0	0	0	0	0	0
ARL1__chr12	8,01	0	2	7,01	6	7,01	2	0	10,01	5	7,01	0	3	5	0	2	0	2	0	5	14,02	16,03	0	0	9,01	0	1	6	2	5	5	0	10,01	6	0	1	0	0	0	0	0	0	0	9,01	9,01	2	4	4	6
ARL2BP__chr16	6	0	0	8,01	6	2	2	0	5	9,01	1	0	0	3	0	6	0	2	0	1	6	3	0	0	5	0	0	3	0	4	0	0	10,01	2	0	0	0	0	1	0	0	0	0	3	4	1	1	5	3
ARL2__chr11	12,02	0	3	10,01	3	7,01	3	0	6	8,01	2	0	6	10,01	0	7,01	0	2	0	7,01	5	9,01	0	0	11,01	0	0	1	2	1	3	0	8,01	3	0	0	0	0	0	0	0	0	0	6	3	9,01	1	1	18,04
ARL3__chr10	7,01	0	6	5	2	6	3	0	12,02	5	4	0	2	5	0	7,01	0	5	0	12,02	4	12,02	1	0	10,01	0	3	5	1	4	9,01	0	14,02	7,01	0	0	0	0	1	0	1	0	0	6	4	1	5	5	17,03
ARL4A__chr7	1	0	0	4	0	1	0	0	2	2	0	0	0	0	0	2	0	0	0	3	1	1	0	0	5	0	0	0	0	1	2	0	1	1	0	0	0	0	0	0	0	0	0	0	0	0	0	0	0
ARL4C__chr2	34,14	0	29,1	20,05	9,01	33,13	18,04	0	36,15	13,02	29,1	0	44,23	53,34	0	60,44	0	45,24	0	70,6	21,05	15,03	0	1	19,04	0	7,01	21,05	14,02	22,06	75,69	1	22,06	17,03	0	0	0	0	0	1	0	0	1	18,04	44,23	35,15	17,03	26,08	23,06
ARL4D__chr17	2	0	0	2	1	0	0	0	0	1	1	0	3	1	0	0	0	1	0	5	1	3	0	0	3	0	0	0	0	3	0	0	1	1	0	0	0	0	0	0	0	0	0	0	1	1	0	0	4
ARL5A__chr2	6	1	2	6	5	8,01	6	1	8,01	2	0	0	4	5	0	7,01	0	7,01	0	9,01	4	3	0	0	10,01	0	2	4	2	2	4	0	6	2	0	0	0	0	0	0	0	0	0	6	6	6	3	3	3
ARL5B__chr10	0	0	0	0	0	0	0	0	1	0	1	0	0	0	0	0	0	0	0	0	0	1	0	0	0	0	0	0	0	0	0	0	1	0	0	0	0	0	0	0	0	0	0	0	0	1	0	0	1
ARL6IP1__chr16	66,53	0	4	79,76	39,18	3	2	0	146,57	36,15	25,07	1	14,02	8,01	0	34,14	0	7,01	0	23,06	26,08	230,33	0	0	70,6	0	7,01	28,09	5	6	52,33	0	55,37	32,12	0	0	0	1	0	0	2	0	1	9,01	6	45,24	45,24	8,01	57,39
ARL6IP4__chr12	11,01	0	1	14,02	7,01	6	6	0	13,02	8,01	1	0	4	3	0	5	0	8,01	0	10,01	6	7,01	0	0	8,01	0	4	1	3	2	6	0	18,04	4	0	0	0	0	0	0	0	0	0	7,01	2	5	3	0	11,01
ARL6IP5__chr3	24,07	0	11,01	12,02	8,01	13,02	7,01	0	22,06	17,03	17,03	1	3	9,01	0	14,02	0	11,01	0	37,16	12,02	24,07	0	0	11,01	0	7,01	3	3	13,02	15,03	0	19,04	8,01	0	0	0	0	0	0	0	0	0	24,07	16,03	8,01	4	10,01	12,02
ARL6IP6__chr2	0	0	0	8,01	0	0	2	0	4	2	0	0	0	0	0	1	0	1	0	1	1	1	0	0	2	0	2	0	0	0	4	0	2	1	0	0	0	0	0	0	0	0	0	0	0	1	0	0	0
ARL6__chr3	1	0	0	0	0	0	0	0	0	0	0	0	0	0	0	0	0	0	0	0	0	1	0	0	0	0	0	0	0	0	1	0	1	0	0	0	0	0	0	0	0	0	0	0	1	0	0	0	0
ARL8A__chr1	3	0	2	0	2	1	2	0	7,01	3	2	0	1	4	0	1	0	1	0	7,01	4	3	0	0	7,01	0	1	1	2	3	0	0	1	0	0	0	0	0	0	0	0	0	0	0	3	1	1	10,01	3
ARL8B__chr3	7,01	0	3	5	3	1	4	0	10,01	6	0	0	2	3	0	7,01	0	5	0	6	8,01	6	0	0	8,01	0	0	3	2	8,01	3	0	12,02	1	0	0	0	0	0	0	0	0	0	5	5	2	0	4	12,02
ARL9__chr4	0	0	0	0	0	0	0	0	0	0	0	0	0	0	0	0	0	0	0	0	0	0	0	0	0	0	0	0	0	0	0	0	0	0	0	0	0	0	0	0	0	0	0	0	0	0	0	0	0
ARMC10__chr7	4	0	1	4	7,01	4	1	0	4	2	0	0	4	1	0	1	0	4	0	1	2	11,01	0	0	3	0	1	0	1	1	2	0	6	2	0	0	0	0	0	0	0	0	1	5	2	3	5	2	3
ARMC12__chr6	0	0	0	0	0	0	0	0	0	0	0	0	0	0	0	0	0	0	0	0	0	0	0	0	0	0	0	0	0	0	0	0	0	0	0	0	0	0	0	0	0	0	0	0	0	0	0	0	0
ARMC1__chr8	12,02	0	2	4	3	2	3	0	3	3	2	0	3	3	0	3	0	4	0	4	4	4	0	0	8,01	0	2	0	2	2	11,01	0	13,02	1	0	0	0	0	0	0	0	0	0	0	0	5	4	4	5
ARMC2__chr6	0	0	0	0	0	0	0	0	0	0	0	0	0	0	0	0	0	0	0	1	0	0	0	0	0	0	0	0	0	0	0	0	0	0	0	0	0	0	0	0	0	0	0	0	0	0	0	0	0
ARMC4__chr10	0	0	0	1	0	0	0	0	3	0	0	0	0	0	0	0	0	0	0	2	0	0	0	0	0	0	0	0	0	0	3	0	0	0	0	0	0	0	0	0	0	0	0	0	0	0	0	0	0
ARMC5__chr16	0	0	1	1	4	0	1	0	1	5	0	0	1	1	0	0	0	1	0	0	1	3	0	0	3	0	0	0	0	0	0	0	0	0	1	0	0	0	0	0	0	0	0	0	1	1	0	0	1
ARMC6__chr19	3	0	0	5	1	3	1	0	2	2	1	0	0	0	0	1	0	3	0	2	1	2	0	0	0	0	0	0	0	0	2	0	3	3	0	0	0	0	0	0	0	0	0	1	1	1	1	0	3
ARMC7__chr17	1	0	0	0	0	0	2	0	2	1	0	0	0	1	0	0	0	1	0	0	0	0	0	0	0	0	0	0	0	0	0	0	1	0	0	0	0	0	0	0	0	0	0	1	1	0	0	1	0
ARMC8__chr3	2	0	2	0	3	3	0	0	2	1	1	0	0	2	0	1	0	4	0	2	1	1	0	0	7,01	0	0	0	2	1	1	0	6	1	0	0	0	0	0	0	0	0	0	2	3	0	3	0	2
ARMC9__chr2	0	0	1	2	1	1	2	0	5	1	2	0	1	1	0	2	0	1	0	1	2	1	0	0	1	0	2	1	0	0	0	0	2	1	0	0	2	0	0	0	0	0	0	1	0	1	0	2	2
ARMCX1__chrX	1	0	2	2	0	4	1	0	6	0	0	0	1	2	0	1	0	4	0	5	1	0	0	0	1	0	1	3	0	1	1	0	2	0	0	0	0	0	0	0	0	0	0	0	2	1	1	2	4
ARMCX2__chrX	3	0	0	8,01	2	2	2	0	6	0	2	0	2	3	0	0	0	5	0	4	1	2	0	0	3	0	1	4	0	8,01	7,01	0	8,01	2	0	0	0	0	0	0	0	0	0	0	7,01	2	0	0	5
ARMCX3__chrX	3	0	0	5	2	4	3	0	5	0	2	0	1	3	0	2	0	2	0	3	1	6	0	0	4	0	0	1	1	1	1	0	5	1	0	0	0	0	0	0	0	0	0	2	9,01	2	1	6	7,01
ARMCX5__chrX	0	0	0	0	1	1	0	0	0	0	0	0	1	1	0	0	0	1	0	2	0	0	0	0	2	0	0	0	0	0	0	0	1	0	0	0	0	0	0	0	0	0	0	0	3	2	0	1	1
ARMCX6__chrX	3	0	2	2	3	2	3	0	4	1	2	0	0	1	0	1	0	3	0	4	2	6	0	0	5	0	4	1	2	1	1	0	2	4	0	0	0	0	0	0	0	0	0	3	1	2	4	3	3
ARMS2__chr10	0	0	0	0	0	0	0	0	0	0	0	0	0	0	0	0	0	0	0	0	0	0	0	0	0	0	0	0	0	0	0	0	0	0	0	0	0	0	0	0	0	0	0	0	0	0	0	0	0
ARNT2__chr15	0	0	1	1	3	1	3	0	0	0	0	0	0	0	0	0	0	2	0	2	0	2	0	0	1	0	0	0	0	7,01	0	0	2	3	0	0	0	0	0	0	0	0	0	3	3	1	0	0	0
ARNTL2__chr12	10,01	0	1	7,01	1	2	2	0	6	3	0	0	1	1	0	3	0	0	0	2	4	4	0	0	6	0	0	1	1	0	8,01	0	9,01	3	0	0	0	0	0	0	0	0	0	0	1	2	1	0	7,01
ARNTL__chr11	1	0	0	2	1	0	0	0	5	0	1	0	0	0	0	0	0	1	0	4	0	3	0	0	2	0	3	0	0	0	0	0	0	1	0	0	0	0	0	0	0	0	0	0	0	0	1	0	4
ARNT__chr1	1	0	2	1	0	1	1	0	0	1	0	0	0	0	0	0	0	0	0	1	3	1	0	0	0	0	0	1	0	0	1	0	1	2	0	0	0	0	0	0	0	0	0	0	0	0	0	1	0
ARPC1A__chr7	21,05	0	5	29,1	21,05	21,05	4	0	19,04	32,12	8,01	0	24,07	16,03	1	20,05	0	12,02	0	34,14	18,04	25,07	0	0	21,05	0	10,01	8,01	4	14,02	18,04	0	45,24	8,01	1	0	0	1	0	1	0	0	1	28,09	10,01	10,01	10,01	8,01	32,12
ARPC1B__chr7	21,05	0	8,01	14,02	11,01	15,03	5	0	12,02	13,02	13,02	0	5	13,02	0	10,01	0	11,01	0	14,02	8,01	24,07	0	0	13,02	0	2	1	2	4	14,02	0	9,01	9,01	0	0	0	0	1	0	0	0	0	15,03	9,01	3	6	8,01	11,01
ARPC2__chr2	62,47	0	21,05	84,86	75,69	47,27	29,1	1	106,36	60,44	35,15	0	42,21	40,19	1	62,47	0	56,38	1	92,01	76,7	96,11	0	0	81,8	0	25,07	29,1	24,07	21,05	66,53	1	95,08	32,12	2	1	3	4	1	0	0	1	3	34,14	40,19	46,25	26,08	27,09	85,88
ARPC3__chr12	34,14	0	12,02	43,22	33,13	23,06	15,03	0	29,1	28,09	20,05	0	26,08	18,04	0	28,09	0	15,03	0	34,14	11,01	34,14	0	0	31,11	0	6	10,01	4	19,04	31,11	0	41,2	23,06	0	0	0	0	0	1	0	1	0	27,09	19,04	15,03	9,01	13,02	34,14
ARPC4__chr3	13,02	0	6	29,1	11,01	13,02	5	0	15,03	13,02	8,01	0	12,02	9,01	0	25,07	0	7,01	0	10,01	20,05	19,04	0	0	27,09	0	6	3	8,01	6	11,01	0	18,04	3	0	0	0	0	1	0	0	0	4	17,03	7,01	11,01	12,02	13,02	18,04
ARPC5L__chr9	5	0	2	10,01	4	1	0	0	5	6	1	0	1	4	0	0	0	4	0	0	5	7,01	0	0	3	0	0	1	0	3	7,01	0	7,01	1	0	0	0	0	0	0	1	0	0	1	2	6	3	1	0
ARPC5__chr1	31,11	0	5	41,2	27,09	11,01	8,01	0	33,13	36,15	13,02	0	17,03	12,02	1	32,12	0	11,01	1	12,02	19,04	51,31	0	0	27,09	0	5	10,01	4	16,03	32,12	0	32,12	9,01	0	0	1	0	0	0	0	0	0	23,06	15,03	21,05	18,04	5	45,24
ARPP19__chr15	23,06	0	4	15,03	11,01	7,01	5	0	19,04	21,05	9,01	0	3	5	2	22,06	0	4	0	8,01	7,01	20,05	0	0	28,09	0	4	9,01	4	1	18,04	0	22,06	6	0	0	0	0	0	0	0	0	0	8,01	9,01	6	7,01	10,01	27,09
ARPP21__chr3	0	0	0	0	0	0	0	0	0	0	0	0	0	0	0	0	0	0	0	0	0	0	0	0	0	0	0	0	0	0	0	0	0	0	0	0	0	0	0	0	0	0	0	0	0	0	0	0	0
ARRB1__chr11	2	0	0	0	0	0	0	0	0	0	0	0	0	0	0	0	0	0	0	0	0	1	0	0	0	0	0	0	0	0	0	0	0	1	0	0	0	0	0	0	0	0	0	1	2	0	0	0	0
ARRB2__chr17	1	0	0	3	0	0	3	0	5	2	0	0	1	0	0	0	0	2	0	0	2	0	0	0	1	0	0	0	0	2	1	0	2	0	0	0	0	0	0	0	0	0	0	0	0	0	0	0	3
ARRDC1__chr9	1	0	2	1	2	4	1	0	1	2	1	0	0	2	0	0	0	1	0	3	1	1	0	0	2	0	2	0	0	0	0	0	5	0	0	0	0	0	0	0	0	0	0	2	2	0	0	1	3
ARRDC2__chr19	0	0	0	0	0	1	0	0	0	0	0	0	0	1	0	1	0	0	0	0	0	0	0	0	0	0	0	0	0	1	1	0	0	1	0	0	0	0	0	0	0	0	0	2	0	0	0	2	0
ARRDC3-AS1__chr5	0	0	0	0	0	0	0	0	0	0	0	0	0	0	0	0	0	0	0	1	0	0	0	0	0	0	0	0	0	0	0	0	0	0	0	0	0	0	0	0	0	0	0	0	1	0	0	0	0
ARRDC3__chr5	5	0	3	1	0	0	3	0	7,01	1	1	0	3	2	0	2	0	0	0	6	0	15,03	0	0	5	0	0	1	0	3	2	0	0	4	0	1	0	0	0	0	1	0	1	7,01	2	0	0	13,02	2
ARRDC4__chr15	0	0	0	1	0	0	0	0	0	3	0	0	0	1	0	0	0	0	0	2	0	1	0	0	0	0	0	0	0	1	0	0	0	1	0	0	0	0	0	0	0	0	0	0	0	4	0	0	0
ARSA__chr22	0	0	1	0	0	1	2	0	0	1	0	0	0	2	0	0	0	1	0	2	2	0	0	0	1	0	1	0	0	1	0	0	0	0	0	0	0	0	1	0	0	0	0	2	4	0	0	1	0
ARSB__chr5	2	0	0	2	0	1	0	0	0	0	2	0	0	2	0	2	0	3	0	2	2	3	0	0	1	0	1	0	0	1	1	0	1	0	0	0	0	0	0	0	0	0	0	0	3	2	0	1	3
ARSD__chrX	0	0	0	0	1	1	1	0	0	0	0	0	2	2	0	1	0	1	0	3	0	0	0	0	1	0	1	0	0	3	1	0	1	0	0	0	0	0	0	0	0	0	0	1	2	0	0	1	1
ARSE__chrX	0	0	0	0	0	0	0	0	0	0	0	0	0	0	0	0	0	0	0	0	0	0	0	0	0	0	1	0	0	0	1	0	0	0	0	0	0	0	0	0	0	0	0	0	0	0	0	1	0
ARSF__chrX	0	0	0	0	0	0	0	0	0	0	0	0	0	0	0	0	0	0	0	0	0	0	0	0	0	0	0	0	0	0	0	0	0	0	0	0	0	0	0	0	0	0	0	0	0	0	0	0	0
ARSG__chr17	0	0	0	0	0	0	0	0	0	0	0	0	0	0	0	0	0	0	0	0	0	0	0	0	0	0	0	0	0	1	0	0	0	0	0	0	0	0	0	0	0	0	0	0	0	1	0	1	0
ARSI__chr5	1	0	1	0	0	0	0	0	1	0	0	0	2	0	0	1	0	0	0	1	0	0	0	0	1	0	0	0	0	2	0	0	0	0	0	0	0	0	0	0	0	0	0	0	1	0	0	0	0
ARSJ__chr4	2	0	1	2	1	0	0	0	3	1	1	0	0	0	0	1	0	2	0	0	4	0	0	0	2	0	0	2	0	0	0	0	4	0	0	0	0	0	0	0	0	0	0	0	1	0	1	0	0
ARSK__chr5	0	0	1	3	0	1	1	0	3	1	0	0	1	2	0	1	0	2	0	2	0	1	0	0	2	0	0	0	1	0	0	0	0	0	0	0	0	0	0	0	0	0	0	0	0	0	0	0	2
ARTN__chr1	0	0	0	0	0	0	0	0	0	0	0	0	0	0	0	0	0	0	0	0	0	0	0	0	0	0	0	0	0	0	0	0	1	0	0	0	0	0	0	0	0	0	0	0	0	0	0	0	0
ARV1__chr1	0	0	2	0	4	1	1	0	2	1	0	0	0	3	0	2	0	2	0	3	0	2	0	0	3	0	1	1	1	1	0	0	1	3	0	0	0	0	2	0	0	0	0	3	1	1	0	1	1
ARVCF__chr22	0	0	0	0	0	0	0	0	0	0	0	0	0	0	0	0	0	0	0	0	0	0	0	0	0	0	0	0	0	0	0	0	0	0	0	0	0	0	0	0	0	0	0	0	0	0	0	0	0
ARX__chrX	0	0	0	0	0	0	0	0	0	0	0	0	0	0	0	0	0	0	0	0	0	0	0	0	0	0	0	0	0	0	0	0	0	0	0	0	0	0	0	0	0	0	0	0	0	0	0	0	0
AR__chrX	0	0	0	0	0	0	0	0	0	0	0	0	0	0	0	0	0	0	0	0	0	0	0	0	0	0	0	0	0	0	0	0	0	0	0	0	0	0	0	0	0	0	0	0	0	0	0	0	0
ASAH1__chr8	3	0	6	3	2	0	2	0	6	1	1	0	0	7,01	0	3	0	0	0	2	1	5	0	0	5	0	1	3	4	4	8,01	0	2	1	0	0	0	0	0	0	0	0	0	4	1	2	0	10,01	4
ASAH2__chr10	0	0	0	0	0	0	0	0	0	0	0	0	0	0	0	0	0	0	0	0	0	0	0	0	0	0	0	0	0	0	0	0	0	0	0	0	0	0	0	0	0	0	0	0	0	0	0	0	0
ASAP1-IT1__chr8	0	0	0	0	0	0	0	0	0	0	0	0	0	0	0	0	0	0	0	0	0	2	0	0	0	0	0	0	0	0	0	0	0	0	0	0	0	0	0	0	0	0	0	0	0	0	0	0	0
ASAP1__chr8	14,02	0	12,02	13,02	4	14,02	2	0	11,01	7,01	4	0	5	11,01	0	0	0	5	0	24,07	8,01	10,01	0	1	11,01	0	10,01	2	1	11,01	3	0	9,01	7,01	0	0	0	0	2	0	0	0	0	7,01	12,02	1	1	21,05	10,01
ASAP2__chr2	11,01	0	8,01	9,01	2	15,03	1	0	7,01	11,01	4	0	2	9,01	1	3	0	7,01	0	17,03	7,01	15,03	0	0	7,01	0	10,01	1	3	10,01	9,01	0	14,02	8,01	0	1	0	0	1	0	0	0	0	14,02	23,06	4	5	20,05	13,02
ASAP3__chr1	0	0	0	2	0	1	0	0	0	0	0	0	0	1	0	0	0	0	0	1	1	0	0	0	0	0	0	0	0	0	1	0	0	1	0	0	0	1	0	0	0	0	0	1	0	0	0	0	0
ASB11__chrX	0	0	0	0	0	0	0	0	0	1	0	0	0	0	0	0	0	0	0	0	0	0	0	0	1	0	0	0	0	0	0	0	0	0	0	0	0	0	0	0	0	0	0	0	0	0	0	0	0
ASB13__chr10	0	0	0	0	1	0	0	0	0	0	0	0	0	1	0	0	0	0	0	1	0	0	0	0	0	0	0	0	0	0	0	0	0	0	0	0	0	0	0	0	0	0	0	2	1	1	0	0	0
ASB16-AS1__chr17	0	0	1	1	0	1	0	0	0	0	1	0	0	0	0	0	0	0	0	1	1	1	0	0	1	0	0	0	0	0	0	0	0	1	0	0	0	0	0	0	0	0	0	1	0	0	1	0	3
ASB1__chr2	6	0	0	5	2	2	4	0	3	7,01	1	0	0	3	0	2	0	2	0	2	4	0	0	0	6	0	0	0	2	1	3	0	1	3	0	0	0	0	0	0	0	0	0	4	4	1	0	3	3
ASB3__chr2	2	0	1	1	0	0	0	0	2	3	1	0	0	0	0	2	0	2	0	0	1	2	0	0	0	0	0	2	0	1	0	0	0	1	0	0	0	0	0	0	0	0	0	0	0	0	0	0	0
ASB4__chr7	0	0	0	0	0	0	0	0	0	0	0	0	0	0	0	0	0	0	0	0	0	1	0	0	0	0	0	0	0	0	0	0	0	0	0	0	0	0	0	0	0	0	0	0	0	0	0	0	0
ASB6__chr9	2	0	1	2	2	0	0	0	2	0	0	0	2	0	0	1	0	0	0	2	2	2	0	0	0	0	0	1	1	1	0	0	0	2	0	0	0	0	0	0	0	0	0	1	2	1	0	2	2
ASB7__chr15	0	0	0	1	0	2	1	0	6	1	0	0	0	0	0	1	0	0	0	3	0	2	0	0	1	0	1	0	0	0	0	0	0	1	0	0	0	0	0	1	0	0	0	1	0	0	0	2	1
ASB8__chr12	2	0	1	2	4	6	1	0	6	4	1	0	2	7,01	0	2	0	6	0	1	3	2	0	0	7,01	0	2	1	0	2	0	0	2	8,01	0	0	0	0	0	0	0	0	0	3	4	3	1	1	3
ASB9__chrX	0	0	0	0	0	0	0	0	0	0	0	0	0	0	0	0	0	0	0	0	0	0	0	0	0	0	0	0	0	0	0	0	0	0	0	0	0	0	0	0	0	0	0	0	0	0	0	0	0
ASCC1__chr10	1	0	3	0	6	2	4	0	3	1	0	0	1	3	0	2	0	5	0	3	0	1	0	0	4	0	3	1	1	0	0	0	4	0	0	0	0	0	0	0	0	0	0	4	6	2	1	2	6
ASCC2__chr22	3	0	4	2	3	1	1	0	9,01	2	0	0	4	2	0	2	0	0	0	9,01	5	4	0	0	7,01	0	0	1	0	3	1	0	6	0	0	1	0	0	0	0	0	0	0	0	4	3	2	1	6
ASCC3__chr6	7,01	0	0	6	0	4	1	0	5	2	1	0	1	5	0	1	0	0	0	5	11,01	2	0	0	6	0	0	0	0	4	2	0	9,01	1	0	0	0	0	0	0	0	0	0	2	7,01	0	4	5	7,01
ASCL1__chr12	0	0	0	0	0	0	0	0	0	0	0	0	0	0	0	0	0	0	0	0	0	0	0	0	0	0	0	0	0	0	0	0	0	0	0	0	0	0	0	0	0	0	0	0	0	0	0	0	0
ASF1A__chr6	4	0	0	4	3	5	2	0	16,03	3	4	0	1	0	0	5	0	5	0	3	3	8,01	0	0	4	0	1	2	2	1	4	0	10,01	4	0	0	0	0	1	1	0	0	0	5	4	4	6	2	8,01
ASF1B__chr19	13,02	0	0	15,03	3	1	0	0	21,05	8,01	1	0	0	1	0	4	0	3	0	0	7,01	5	0	0	28,09	0	0	0	1	0	9,01	0	9,01	0	0	0	0	0	0	0	0	0	0	0	1	6	2	2	17,03
ASGR1__chr17	0	0	0	0	0	0	0	0	0	1	0	0	0	0	0	0	0	0	0	0	0	0	0	0	0	0	0	0	0	0	0	0	0	0	0	0	0	0	0	0	0	0	0	0	0	0	0	0	0
ASH1L-AS1__chr1	0	0	0	0	0	0	0	0	0	1	0	0	0	0	0	0	0	0	0	0	0	1	0	0	0	0	0	0	0	0	0	0	1	0	0	0	0	0	0	0	0	0	0	0	0	0	0	0	0
ASH1L__chr1	4	0	3	2	1	3	2	0	4	5	1	0	0	2	0	1	0	3	0	6	5	3	0	0	3	0	0	1	0	0	1	0	0	1	0	0	0	0	0	0	0	0	0	2	1	1	2	1	0
ASH2L__chr8	7,01	0	4	5	5	0	2	0	3	3	0	0	1	2	0	3	0	6	0	3	5	3	0	0	2	0	1	1	0	3	6	0	13,02	5	0	0	0	0	0	0	0	0	0	2	1	5	4	3	9,01
ASIC1__chr12	0	0	0	3	0	0	1	0	1	0	0	0	0	0	0	1	0	0	0	3	0	2	0	0	0	0	0	0	1	0	0	0	1	0	0	0	1	0	0	0	2	0	0	3	3	3	0	1	0
ASIC3__chr7	0	0	0	0	0	0	0	0	0	0	0	0	0	0	0	0	0	0	0	0	0	0	0	0	0	0	1	0	0	0	0	0	0	0	0	0	0	0	0	0	0	0	0	0	0	0	0	0	2
ASL__chr7	3	0	2	6	2	1	0	0	3	3	0	0	2	0	0	3	0	4	0	0	1	0	0	0	1	0	0	0	0	2	2	0	5	0	0	0	0	0	0	0	0	0	0	0	2	2	0	1	0
ASNA1__chr19	9,01	0	3	19,04	8,01	2	5	0	12,02	8,01	8,01	0	3	1	0	14,02	0	7,01	0	10,01	6	8,01	0	0	8,01	0	3	2	1	4	10,01	0	1	4	0	0	0	0	0	0	1	0	0	4	8,01	10,01	2	5	11,01
ASNSD1__chr2	3	0	1	6	4	0	1	0	6	6	0	0	3	1	0	3	0	5	0	9,01	2	2	0	0	6	0	0	3	1	0	2	0	8,01	1	0	0	0	0	0	0	0	0	0	1	2	1	1	0	2
ASNS__chr7	2	0	1	0	2	3	0	0	1	4	1	0	3	0	0	1	0	3	0	3	1	2	0	0	0	0	2	0	1	0	1	0	3	1	0	0	0	0	0	0	0	0	0	1	1	0	0	0	3
ASPHD1__chr16	0	0	2	1	0	0	0	0	1	0	0	0	0	0	0	1	0	0	0	0	0	0	0	0	0	0	0	0	0	0	0	0	0	0	0	0	0	0	0	0	0	0	0	0	0	0	0	1	0
ASPHD2__chr22	0	0	0	0	0	0	0	0	0	0	0	0	0	0	0	0	0	1	0	0	0	0	0	0	0	0	0	0	0	0	0	0	0	0	0	0	0	0	0	0	0	0	0	0	0	0	0	2	0
ASPH__chr8	45,24	0	29,1	56,38	43,22	37,16	22,06	1	54,35	47,27	18,04	1	27,09	69,58	0	31,11	0	39,18	1	65,51	49,29	95,08	0	0	63,48	0	9,01	17,03	12,02	21,05	45,24	0	61,45	31,11	0	1	2	0	1	1	0	0	0	53,34	44,23	27,09	21,05	43,22	46,25
ASPM__chr1	34,14	0	0	7,01	0	1	0	0	24,07	11,01	0	1	0	0	0	9,01	0	0	0	0	7,01	38,17	0	0	36,15	0	0	4	1	0	4	0	31,11	1	0	0	0	0	1	0	0	0	1	0	0	10,01	1	0	31,11
ASPN__chr9	0	0	0	0	0	0	0	0	0	0	0	0	0	0	0	0	0	0	0	0	0	0	0	0	0	0	0	0	0	0	0	0	0	0	0	0	0	0	0	0	0	0	0	0	0	0	0	0	0
ASPRV1__chr2	0	0	0	0	0	0	0	0	0	0	0	0	0	0	0	0	0	0	0	0	0	0	0	0	0	0	0	0	0	0	0	0	0	0	0	0	0	0	0	0	0	0	0	0	0	0	0	0	0
ASPSCR1__chr17	1	0	2	0	0	0	1	0	1	0	0	0	1	0	0	2	0	0	0	0	1	0	0	0	1	0	2	0	0	0	0	0	0	0	0	0	0	0	0	0	0	0	0	1	1	0	0	1	3
ASRGL1__chr11	0	0	0	0	0	0	0	0	0	0	0	0	0	0	0	1	0	0	0	0	0	0	0	0	0	0	0	1	0	0	0	0	1	1	0	0	0	0	0	0	0	0	0	0	0	0	0	0	0
ASS1__chr9	0	0	0	0	0	1	0	0	0	0	0	0	0	0	0	0	0	0	0	0	0	0	0	0	0	0	0	0	0	0	0	0	0	0	0	0	0	0	0	0	0	0	0	0	0	0	0	0	0
ASTE1__chr3	0	0	0	1	0	1	0	0	0	0	0	0	0	0	0	0	0	1	0	0	0	1	0	0	0	0	0	0	0	0	0	0	1	0	0	0	0	0	0	0	0	0	0	0	0	0	0	0	1
ASTN2__chr9	1	0	0	0	0	0	0	0	0	0	0	0	0	2	0	0	0	0	0	0	0	0	0	0	0	0	0	1	0	0	0	0	0	0	0	0	1	0	3	0	0	0	0	0	1	0	1	0	0
ASUN__chr12	5	0	0	1	1	4	0	0	6	6	2	0	5	4	0	3	0	3	0	4	5	3	0	0	9,01	0	1	0	1	2	1	0	7,01	1	0	1	0	0	0	0	0	0	0	4	5	3	0	2	10,01
ASXL1__chr20	4	0	4	6	4	4	1	0	4	2	0	0	3	4	0	3	0	3	0	5	0	6	0	0	3	0	1	1	0	2	4	0	12,02	1	0	0	0	0	0	0	0	0	0	2	8,01	1	1	1	6
ASXL2__chr2	0	0	0	0	0	0	0	0	0	1	0	0	2	0	0	0	0	2	0	0	0	0	0	0	1	0	0	0	0	0	0	0	2	0	0	0	0	0	0	0	0	0	0	0	0	1	0	0	0
ASXL3__chr18	0	0	0	0	0	0	0	0	0	0	0	0	0	0	0	0	0	0	0	0	0	0	0	0	0	0	0	0	0	0	0	0	0	0	0	0	0	0	0	0	0	0	0	0	0	0	0	0	0
ASZ1__chr7	0	0	0	0	0	0	0	0	0	0	0	0	0	0	0	0	0	0	0	0	0	0	0	0	0	0	0	0	0	0	0	0	0	0	0	0	0	0	0	0	0	0	0	0	0	0	0	0	0
ATAD1__chr10	4	0	2	4	3	3	0	0	0	2	2	0	7,01	0	0	2	0	8,01	0	3	1	4	0	0	4	0	2	4	1	3	2	0	5	3	0	0	0	0	0	0	0	0	0	2	2	1	5	1	1
ATAD2B__chr2	0	0	1	0	0	0	0	0	3	0	2	0	2	0	0	0	0	0	0	0	0	0	0	0	0	0	1	0	0	0	0	0	0	0	0	0	0	0	0	0	0	0	0	0	0	0	0	0	1
ATAD2__chr8	1	0	0	10,01	2	2	0	0	0	6	0	1	1	2	0	3	0	0	0	1	4	5	0	0	12,02	0	0	0	0	1	14,02	0	7,01	3	0	0	0	1	0	0	0	0	0	2	1	1	1	0	3
ATAD3A__chr1	3	0	0	5	6	1	0	0	2	2	0	0	0	0	0	3	0	0	0	0	2	1	0	0	4	0	0	1	0	0	2	0	0	2	0	0	0	0	0	0	0	0	0	0	1	1	0	0	0
ATAD3B__chr1	1	0	0	1	2	1	0	0	0	0	0	0	0	0	0	1	0	0	0	0	1	1	0	0	0	0	0	1	0	0	2	0	1	1	0	0	0	0	0	0	0	0	0	0	0	0	0	0	1
ATAD3C__chr1	0	0	1	0	0	0	0	0	0	0	0	0	0	0	0	0	0	1	0	0	0	0	0	0	1	0	0	0	0	1	0	0	0	0	0	0	0	0	0	0	0	0	0	0	0	0	0	0	0
ATAD5__chr17	0	0	0	1	0	0	0	0	2	0	0	0	0	0	0	0	0	0	0	0	2	3	0	0	1	0	0	0	0	0	4	0	1	0	0	0	0	0	0	0	0	0	0	0	0	0	0	0	0
ATAT1__chr6	0	0	0	0	0	0	1	0	0	0	0	1	0	0	0	0	0	0	0	0	0	0	0	0	0	0	0	0	0	1	0	0	0	0	0	0	0	0	0	0	0	0	0	0	0	0	0	2	0
ATCAY__chr19	1	0	0	0	1	0	0	0	0	0	0	0	0	1	0	0	0	0	0	1	1	0	0	0	0	0	0	0	0	0	0	0	0	0	0	0	0	0	0	0	0	0	0	0	0	0	0	0	0
ATE1__chr10	1	0	1	2	0	1	0	0	0	0	0	0	0	0	0	1	0	0	0	0	1	2	0	0	0	0	0	0	0	0	0	0	0	1	0	0	0	0	0	0	0	0	0	0	0	0	1	0	1
ATF1__chr12	1	0	3	4	4	3	7,01	0	3	2	4	0	2	2	0	2	0	1	0	7,01	1	5	0	0	2	0	0	1	1	0	6	0	4	5	0	0	0	0	0	0	0	0	0	2	5	3	2	2	0
ATF2__chr2	2	0	5	1	0	5	2	0	4	2	1	0	1	5	0	1	0	4	0	6	2	4	0	0	9,01	0	3	2	3	2	2	0	2	1	0	0	0	0	0	0	0	0	1	5	1	1	3	6	7,01
ATF3__chr1	0	0	0	1	0	0	0	0	0	0	0	0	0	0	0	0	0	0	0	0	0	0	0	0	0	0	0	0	0	0	0	0	0	0	0	0	0	0	0	0	0	0	0	0	0	0	0	0	0
ATF4__chr22	15,03	0	6	13,02	18,04	35,15	4	0	18,04	23,06	12,02	0	6	12,02	0	10,01	0	9,01	0	8,01	18,04	26,08	0	0	26,08	0	5	3	10,01	18,04	3	0	15,03	12,02	0	0	0	0	0	1	0	0	2	24,07	17,03	15,03	9,01	18,04	24,07
ATF5__chr19	0	0	1	1	1	0	0	0	2	4	1	0	2	0	0	0	0	1	0	0	3	0	0	0	6	0	0	0	1	0	4	0	3	2	0	0	0	0	1	0	0	0	0	0	1	5	3	1	2
ATF6B__chr6	0	0	0	0	0	0	0	0	0	0	1	0	0	0	0	0	0	1	0	1	0	0	0	0	0	0	0	0	0	0	0	0	0	2	0	0	0	0	0	0	0	0	0	0	0	2	2	0	0
ATF6__chr1	13,02	0	1	3	2	3	1	0	10,01	7,01	1	0	1	1	0	2	0	3	0	9,01	1	12,02	0	0	10,01	0	2	1	5	7,01	0	0	11,01	3	0	0	0	0	0	0	0	0	0	10,01	4	2	3	6	9,01
ATF7IP2__chr16	0	0	0	0	0	0	0	0	0	0	0	0	0	0	0	1	0	0	0	0	0	0	0	0	0	0	0	0	0	0	0	0	0	0	0	0	0	0	0	0	0	0	0	0	0	0	0	0	0
ATF7IP__chr12	2	0	2	2	4	0	0	0	3	2	0	0	0	2	0	0	0	0	0	0	1	1	0	0	1	0	0	3	2	0	1	0	0	0	0	0	0	0	0	1	0	0	1	1	3	1	0	1	4
ATF7__chr12	1	0	0	2	6	2	0	0	2	0	3	0	1	5	0	1	0	1	0	0	4	4	1	0	0	0	1	1	1	1	4	0	1	2	0	0	0	0	0	0	0	0	0	0	1	1	1	2	4
ATG10__chr5	2	0	0	1	0	0	0	0	0	0	0	0	0	0	0	0	0	0	0	1	1	1	0	0	0	0	0	0	2	0	0	0	0	1	0	0	0	0	0	0	0	0	0	0	0	0	2	0	0
ATG12__chr5	7,01	0	5	2	2	1	2	0	3	5	1	0	1	4	0	4	0	2	0	5	2	11,01	0	0	5	0	1	1	2	2	7,01	0	6	0	0	0	0	0	0	0	0	0	1	2	1	0	2	2	8,01
ATG13__chr11	3	0	2	8,01	3	6	0	0	3	2	1	0	2	2	0	2	0	1	0	3	6	5	0	0	7,01	0	3	0	2	0	4	0	7,01	2	0	0	0	0	0	0	0	0	0	4	3	0	1	4	5
ATG14__chr14	3	0	1	0	0	1	1	0	0	1	0	0	1	5	0	2	0	1	0	1	2	3	0	0	3	0	0	1	3	1	0	0	1	0	0	0	0	0	0	0	0	0	0	3	2	0	0	1	1
ATG16L1__chr2	5	0	0	1	0	4	1	0	1	1	2	0	2	0	0	1	0	2	0	1	3	4	0	0	4	0	0	0	0	0	0	0	6	0	0	0	0	0	0	0	0	0	0	3	2	0	2	1	0
ATG16L2__chr11	1	0	0	0	0	0	0	0	0	1	0	0	0	0	0	0	0	0	0	0	0	0	0	0	1	0	0	0	0	0	1	0	0	0	0	0	0	0	0	0	0	0	0	0	1	0	0	0	0
ATG2A__chr11	1	0	1	1	1	1	0	0	1	0	0	0	0	0	0	0	0	0	0	2	1	2	0	0	0	0	1	1	0	1	0	0	1	0	0	0	0	0	0	0	0	0	0	3	0	0	3	1	0
ATG2B__chr14	0	0	2	1	0	3	1	0	3	1	2	0	2	4	0	0	0	1	0	9,01	0	6	0	0	1	0	1	1	0	0	2	0	0	2	0	1	0	0	0	0	0	0	0	2	5	2	0	6	6
ATG3__chr3	6	0	2	6	9,01	2	6	0	13,02	15,03	2	0	6	9,01	0	6	0	2	0	7,01	8,01	9,01	0	0	12,02	0	0	1	0	7,01	9,01	0	10,01	4	0	0	0	0	0	1	0	0	0	7,01	4	3	6	3	7,01
ATG4A__chrX	0	0	0	0	0	0	0	0	0	0	0	0	0	1	0	1	0	0	0	2	0	0	0	0	1	0	0	0	0	1	0	0	0	0	0	0	0	0	0	0	0	0	0	1	0	0	0	0	1
ATG4B__chr2	4	0	0	9,01	1	2	2	0	6	2	1	0	3	3	0	6	0	2	0	6	0	3	0	0	4	0	2	1	0	6	6	0	10,01	1	0	1	0	0	0	0	0	0	1	1	5	3	2	3	5
ATG4C__chr1	5	0	1	1	0	0	2	0	3	2	1	0	0	0	0	0	0	2	0	0	0	2	0	0	4	0	1	0	0	0	5	0	4	3	0	0	0	0	0	0	0	0	0	1	0	0	0	1	0
ATG4D__chr19	0	0	0	0	0	0	0	0	0	0	0	0	0	0	0	0	0	0	0	0	0	0	0	0	0	0	0	0	0	0	0	0	0	0	0	0	0	0	0	0	0	0	0	0	0	0	0	0	0
ATG5__chr6	5	0	0	0	0	3	0	0	4	1	3	0	4	1	0	5	0	2	0	7,01	4	2	0	0	5	0	0	0	0	1	2	0	1	1	0	0	0	0	0	1	0	0	0	1	0	1	1	5	3
ATG7__chr3	0	0	1	2	0	0	2	0	0	0	0	0	0	0	0	1	0	2	0	2	0	2	0	0	0	0	0	0	0	0	1	0	1	0	0	0	0	0	0	0	0	0	0	2	1	0	0	0	2
ATG9A__chr2	1	0	2	3	1	2	1	0	7,01	1	3	0	2	1	0	6	0	1	0	4	0	2	0	0	4	0	2	0	0	2	1	0	5	1	0	0	0	0	0	0	0	0	0	4	2	1	1	2	6
ATHL1__chr11	0	0	1	0	0	1	0	0	0	0	0	0	0	0	0	0	0	0	0	0	0	1	0	0	0	0	2	0	0	0	0	0	0	0	0	0	0	0	0	0	0	0	0	0	1	0	0	0	0
ATIC__chr2	11,01	0	2	18,04	6	11,01	2	0	11,01	8,01	4	0	2	0	0	6	0	3	0	9,01	8,01	5	0	0	16,03	0	1	1	1	0	9,01	0	12,02	3	0	0	0	0	0	0	0	0	0	1	2	7,01	2	6	15,03
ATL1__chr14	0	0	0	0	0	0	0	0	0	0	0	0	0	0	0	0	0	0	0	0	0	0	0	0	0	0	0	0	1	0	0	0	0	0	0	0	0	0	0	0	0	0	0	0	0	0	0	0	0
ATL2__chr2	0	0	0	1	0	0	0	0	0	0	0	0	1	0	0	0	0	0	0	0	0	2	0	0	1	0	0	0	0	0	0	0	4	1	0	0	0	0	0	0	0	0	0	0	0	0	2	0	1
ATL3__chr11	2	0	0	2	1	2	0	0	2	1	0	0	0	1	0	0	0	1	0	1	0	3	0	0	1	0	0	0	0	0	4	0	2	0	0	1	0	0	0	0	0	0	0	0	1	1	0	3	1
ATMIN__chr16	3	0	3	3	5	5	4	0	2	1	4	0	0	2	0	4	0	3	0	8,01	0	10,01	0	0	4	0	2	2	4	2	4	0	3	4	0	0	0	0	0	0	0	0	0	5	1	3	4	3	3
ATM__chr11	9,01	0	1	3	2	0	1	0	2	2	0	0	2	1	0	4	0	4	0	2	0	7,01	0	0	6	0	7,01	2	2	4	1	0	8,01	2	0	0	0	0	0	0	0	0	1	1	1	1	1	1	10,01
ATN1__chr12	50,3	2	18,04	54,35	22,06	28,09	30,11	0	64,5	46,25	21,05	2	14,02	21,05	0	32,12	0	16,03	0	55,37	37,16	70,6	0	1	49,29	0	17,03	12,02	19,04	24,07	61,45	0	53,34	20,05	0	0	3	0	0	2	0	0	2	68,56	42,21	31,11	15,03	31,11	46,25
ATOH7__chr10	0	0	0	0	0	0	0	0	0	0	0	0	0	0	0	0	0	0	0	0	0	0	0	0	0	0	0	0	0	0	0	0	0	0	0	0	0	0	0	0	0	0	0	0	0	0	0	0	0
ATOH8__chr2	1	0	2	3	0	3	4	0	4	0	1	0	0	6	0	0	0	1	0	6	0	1	0	0	1	0	0	0	0	0	1	0	0	0	0	0	0	0	0	0	0	0	0	0	0	1	0	2	1
ATOX1__chr5	6	0	1	5	2	2	0	0	3	3	1	0	3	1	0	0	0	1	0	6	0	3	0	0	1	0	1	2	0	4	1	0	5	1	0	0	0	0	0	0	0	0	0	4	0	1	1	1	4
ATP10A__chr15	0	0	0	0	0	0	0	0	0	0	0	0	0	0	0	0	0	0	0	0	0	1	0	0	0	0	0	0	0	0	0	0	0	0	0	0	0	0	0	0	0	0	0	0	0	0	0	0	2
ATP10D__chr4	3	0	0	1	1	1	1	0	4	0	4	0	0	2	0	0	0	1	0	3	0	1	0	0	4	0	1	2	0	1	2	0	1	3	0	0	0	0	0	0	0	0	0	2	6	0	1	1	2
ATP11A__chr13	2	0	0	0	0	2	1	0	0	0	0	0	1	0	0	0	0	0	0	1	1	2	0	0	1	0	0	0	2	1	2	0	4	1	0	0	0	0	0	0	0	0	0	0	0	0	1	1	1
ATP11B__chr3	5	0	3	0	5	1	0	0	2	1	0	0	1	2	0	1	0	1	0	2	1	2	0	0	1	0	0	0	1	2	1	0	2	1	0	0	0	0	0	0	0	0	0	4	2	2	1	1	2
ATP11C__chrX	2	0	0	2	2	1	0	0	1	1	0	0	0	1	0	2	0	4	0	0	3	2	0	0	4	0	0	0	0	0	3	0	9,01	0	0	0	0	0	0	0	0	0	0	0	1	2	0	0	8,01
ATP13A1__chr19	3	0	2	3	3	1	2	0	2	3	0	0	4	4	0	0	0	1	0	3	0	5	0	0	4	0	2	0	0	2	0	0	3	1	0	0	0	0	0	0	0	0	0	4	1	1	0	3	0
ATP13A2__chr1	6	0	0	6	5	2	2	0	3	4	3	0	0	7,01	0	6	0	1	0	4	7,01	8,01	0	0	11,01	0	5	2	1	6	2	1	5	4	0	0	0	0	0	0	0	0	0	5	10,01	0	1	2	8,01
ATP13A3__chr3	8,01	0	7,01	8,01	4	4	9,01	0	6	4	1	0	1	4	0	6	0	12,02	0	11,01	5	6	0	0	10,01	0	0	7,01	4	5	6	0	3	1	0	1	2	0	0	0	0	0	0	8,01	13,02	5	0	4	6
ATP1A1OS__chr1	0	0	0	0	0	0	0	0	0	0	0	0	0	0	0	0	0	0	0	0	0	0	0	0	0	0	0	0	0	0	1	0	0	1	0	0	0	0	0	0	0	0	0	0	0	0	0	0	0
ATP1A1__chr1	3	0	6	8,01	7,01	6	6	0	6	13,02	5	0	1	8,01	0	13,02	0	2	0	9,01	5	22,06	0	0	8,01	0	2	4	1	3	5	1	9,01	3	0	0	0	0	0	1	0	0	1	2	9,01	7,01	3	7,01	6
ATP1A2__chr1	0	0	0	0	0	0	0	0	0	0	0	0	0	0	0	0	0	0	0	0	0	0	0	0	0	0	0	0	0	0	0	0	0	0	0	0	0	0	0	0	0	0	0	0	0	0	0	0	0
ATP1A3__chr19	0	0	1	0	0	1	0	0	0	0	0	0	0	0	0	0	0	0	0	1	0	0	0	0	1	0	0	0	0	0	0	0	2	0	0	0	0	0	0	0	0	0	0	0	0	0	0	0	1
ATP1B1__chr1	1	1	4	4	6	2	0	0	1	3	1	0	3	3	0	2	0	1	0	3	5	11,01	0	0	7,01	0	4	2	1	2	3	0	5	1	0	0	0	0	0	0	0	0	1	2	4	0	2	4	10,01
ATP1B2__chr17	0	0	0	0	1	0	0	0	0	0	0	0	0	0	0	0	0	0	0	0	0	0	0	0	0	0	0	0	0	0	0	0	0	0	0	0	0	0	0	0	0	0	0	0	0	0	0	0	0
ATP1B3__chr3	28,09	0	5	35,15	24,07	13,02	20,05	1	50,3	35,15	10,01	0	10,01	7,01	0	19,04	1	18,04	0	31,11	26,08	33,13	0	0	36,15	1	6	6	5	10,01	29,1	0	31,11	8,01	1	0	2	0	0	0	0	0	1	9,01	13,02	25,07	13,02	18,04	50,3
ATP1B4__chrX	0	0	0	0	0	0	0	0	0	0	0	0	0	0	0	0	0	0	0	0	0	0	0	0	0	0	0	0	0	0	0	0	0	0	0	0	0	0	0	0	0	0	0	0	0	0	0	0	0
ATP2A1__chr16	0	0	0	0	0	0	0	0	0	0	0	0	0	0	0	0	0	0	0	0	0	0	0	0	2	0	0	0	0	0	0	0	0	0	0	0	0	0	0	0	0	0	0	0	0	0	0	0	0
ATP2A2__chr12	21,05	0	10,01	30,11	20,05	15,03	8,01	0	17,03	14,02	10,01	1	15,03	17,03	0	19,04	0	15,03	0	20,05	23,06	29,1	0	0	23,06	0	22,06	7,01	5	27,09	28,09	0	38,17	10,01	2	0	0	0	1	1	0	0	4	21,05	23,06	8,01	6	14,02	40,19
ATP2B1__chr12	9,01	0	5	6	6	0	2	0	3	1	0	0	0	4	0	5	0	4	0	8,01	2	3	0	0	14,02	0	1	0	1	1	2	0	3	0	0	0	0	0	0	0	0	0	1	4	0	4	2	2	12,02
ATP2B4__chr1	12,02	0	6	20,05	2	14,02	3	0	9,01	10,01	2	0	9,01	9,01	0	10,01	0	10,01	0	11,01	8,01	11,01	0	0	8,01	0	5	3	1	4	3	2	15,03	4	0	0	0	0	0	0	0	0	0	10,01	14,02	6	1	1	5
ATP2C1__chr3	4	0	2	6	6	7,01	7,01	0	4	2	7,01	0	0	2	0	2	0	7,01	0	14,02	3	10,01	0	0	5	0	3	9,01	0	7,01	6	0	1	1	0	0	0	1	0	0	0	0	0	4	4	1	1	0	6
ATP2C2__chr16	0	0	0	0	0	0	0	0	0	0	0	0	0	0	0	0	0	0	0	0	0	0	0	0	0	0	0	0	0	0	0	0	0	0	0	0	0	0	0	0	0	0	0	0	0	0	0	0	0
ATP5A1__chr18	35,15	1	14,02	55,37	26,08	29,1	9,01	0	55,37	35,15	20,05	0	18,04	24,07	0	41,2	0	18,04	0	30,11	32,12	50,3	0	0	41,2	0	6	15,03	8,01	11,01	34,14	0	49,29	15,03	0	1	1	0	2	0	1	0	0	24,07	25,07	29,1	15,03	21,05	33,13
ATP5B__chr12	46,25	0	15,03	50,3	50,3	41,2	13,02	0	77,72	51,31	24,07	0	30,11	22,06	0	52,33	0	35,15	0	70,6	32,12	49,29	0	0	63,48	0	9,01	16,03	7,01	22,06	44,23	3	68,56	22,06	0	0	0	0	0	0	0	0	3	31,11	36,15	42,21	22,06	23,06	59,42
ATP5C1__chr10	16,03	0	10,01	23,06	14,02	17,03	7,01	0	18,04	5	10,01	0	5	17,03	0	7,01	0	16,03	0	22,06	9,01	24,07	0	0	18,04	0	3	8,01	3	6	7,01	0	19,04	9,01	0	1	0	1	0	0	0	0	0	17,03	8,01	7,01	11,01	8,01	19,04
ATP5D__chr19	6	0	2	3	4	4	1	0	10,01	2	0	0	2	1	0	3	0	2	0	5	8,01	1	1	0	8,01	0	1	0	1	2	9,01	0	4	1	0	0	0	0	0	0	0	0	0	3	3	2	3	1	3
ATP5EP2__chr13	1	0	2	1	3	0	2	0	3	0	1	0	0	0	0	1	0	0	0	2	0	1	0	0	2	0	0	0	1	0	1	0	2	1	0	0	0	0	0	0	0	0	0	1	0	2	1	3	1
ATP5E__chr20	2	0	0	1	1	0	0	0	3	0	1	0	0	0	0	0	0	0	0	0	0	0	0	0	1	0	0	0	1	0	0	0	2	0	0	0	0	0	0	0	0	0	0	0	0	0	0	1	0
ATP5F1__chr1	15,03	0	7,01	17,03	21,05	4	3	0	26,08	15,03	6	1	11,01	9,01	0	11,01	0	19,04	0	18,04	21,05	26,08	0	0	29,1	0	6	5	3	7,01	13,02	0	35,15	4	0	0	1	1	0	0	0	0	0	11,01	9,01	9,01	11,01	14,02	21,05
ATP5G1__chr17	11,01	0	3	9,01	9,01	6	2	0	11,01	11,01	2	0	10,01	3	0	5	0	8,01	0	8,01	7,01	12,02	0	0	18,04	0	2	3	2	5	11,01	0	12,02	1	1	0	0	0	0	0	0	0	1	3	4	7,01	7,01	0	14,02
ATP5G2__chr12	61,45	0	33,13	50,3	38,17	39,18	22,06	0	93,04	34,14	35,15	0	31,11	34,14	0	37,16	0	33,13	0	70,6	36,15	72,63	0	0	80,78	1	26,08	25,07	21,05	27,09	40,19	0	43,22	25,07	2	0	0	1	0	1	0	0	2	57,39	36,15	32,12	29,1	41,2	61,45
ATP5G3__chr2	35,15	0	5	25,07	19,04	12,02	12,02	0	42,21	20,05	18,04	0	16,03	13,02	0	27,09	0	25,07	0	32,12	30,11	23,06	0	0	42,21	2	7,01	16,03	7,01	8,01	22,06	0	21,05	13,02	0	0	0	0	0	0	0	0	0	9,01	10,01	22,06	16,03	12,02	25,07
ATP5H__chr17	19,04	0	11,01	12,02	21,05	14,02	3	1	21,05	16,03	15,03	0	12,02	8,01	0	17,03	0	7,01	0	14,02	8,01	30,11	0	0	16,03	0	4	5	3	7,01	15,03	0	14,02	8,01	1	0	0	0	0	0	0	0	0	9,01	3	11,01	12,02	7,01	15,03
ATP5I__chr4	8,01	0	0	2	2	3	1	0	5	4	2	0	7,01	1	0	8,01	0	3	0	5	0	5	0	0	9,01	0	0	1	1	2	1	0	3	3	0	0	0	0	0	0	0	0	0	3	3	5	4	2	8,01
ATP5J2-PTCD1__chr7	0	0	0	0	0	0	0	0	0	0	0	0	0	0	0	0	0	0	0	0	0	0	0	0	0	0	0	0	0	0	0	0	0	0	0	0	0	0	0	0	0	0	0	0	0	0	0	0	0
ATP5J2__chr7	19,04	0	8,01	27,09	16,03	17,03	8,01	0	29,1	14,02	16,03	0	13,02	8,01	0	20,05	0	9,01	0	31,11	16,03	21,05	0	0	36,15	0	9,01	6	5	9,01	21,05	0	31,11	7,01	2	0	1	1	0	1	1	0	1	14,02	9,01	16,03	10,01	12,02	25,07
ATP5J__chr21	23,06	0	9,01	23,06	15,03	17,03	4	0	27,09	24,07	12,02	0	16,03	13,02	0	15,03	0	17,03	0	19,04	24,07	37,16	0	0	22,06	0	6	8,01	4	13,02	28,09	0	23,06	19,04	0	0	0	0	0	0	0	0	0	15,03	12,02	10,01	20,05	12,02	26,08
ATP5L2__chr22	1	0	0	0	0	0	0	0	0	0	0	0	0	0	0	0	0	0	0	0	0	0	0	0	0	0	0	0	0	0	0	0	0	0	0	0	0	0	0	0	0	0	0	0	0	0	0	0	0
ATP5L__chr11	17,03	0	3	14,02	12,02	12,02	5	0	23,06	18,04	10,01	0	8,01	6	0	20,05	0	7,01	0	8,01	7,01	13,02	0	0	11,01	0	7,01	12,02	3	11,01	9,01	0	16,03	5	0	1	0	0	0	0	0	0	1	8,01	6	10,01	5	6	12,02
ATP5O__chr21	17,03	0	5	13,02	19,04	12,02	4	0	19,04	11,01	9,01	0	10,01	5	0	12,02	1	13,02	0	23,06	12,02	17,03	0	0	14,02	0	3	6	4	2	18,04	0	23,06	2	0	0	0	0	0	0	0	0	0	6	14,02	8,01	7,01	6	10,01
ATP5SL__chr19	9,01	0	3	9,01	5	7,01	3	0	9,01	4	9,01	0	2	3	0	3	1	8,01	0	3	7,01	9,01	0	0	5	0	0	0	5	1	3	0	11,01	1	0	0	0	0	0	0	0	0	1	10,01	8,01	3	1	2	4
ATP5S__chr14	1	0	0	2	2	0	0	0	1	1	0	0	0	0	0	0	0	0	0	2	0	0	0	0	1	0	0	0	0	0	0	0	0	0	0	0	0	0	0	0	0	0	0	1	1	0	0	0	3
ATP6AP1L__chr5	0	0	0	0	0	0	0	0	0	0	0	0	0	0	0	0	0	0	0	0	0	0	0	0	0	0	0	0	0	0	0	0	0	0	0	0	0	0	0	0	0	0	0	0	0	0	0	2	0
ATP6AP1__chrX	4	0	5	7,01	5	2	3	0	1	1	0	0	0	6	0	5	0	0	0	6	2	5	0	0	4	0	1	0	3	4	10,01	0	2	6	0	0	0	0	1	1	0	0	0	7,01	11,01	1	0	7,01	4
ATP6AP2__chrX	11,01	0	4	14,02	6	13,02	6	0	24,07	9,01	10,01	0	4	20,05	0	13,02	0	10,01	0	26,08	9,01	27,09	0	0	14,02	0	5	4	4	12,02	8,01	1	22,06	11,01	0	0	0	0	0	0	0	0	0	30,11	20,05	12,02	4	21,05	37,16
ATP6V0A1__chr17	2	0	3	4	2	3	3	0	0	0	0	0	1	3	0	0	0	1	0	6	0	2	0	0	2	0	4	0	3	6	1	0	7,01	2	0	0	0	0	0	0	0	0	0	4	4	1	0	3	2
ATP6V0A2__chr12	3	1	0	4	0	0	0	0	2	5	1	0	1	0	0	2	0	0	0	1	0	3	0	0	1	0	0	0	0	1	3	0	1	1	0	0	0	0	0	0	0	0	1	0	0	2	0	2	1
ATP6V0A4__chr7	0	0	0	0	0	0	0	0	0	0	0	0	0	0	0	0	0	0	0	0	0	0	0	0	0	0	0	0	0	0	0	0	0	0	0	0	0	0	0	0	0	0	0	0	0	0	0	0	0
ATP6V0B__chr1	18,04	1	3	11,01	11,01	5	3	0	19,04	11,01	8,01	0	6	2	0	8,01	0	8,01	0	6	3	27,09	0	0	21,05	0	4	3	1	6	7,01	0	19,04	5	0	0	0	0	0	0	0	0	0	9,01	9,01	5	3	5	18,04
ATP6V0CP3__chr6	0	0	0	0	0	0	0	0	0	0	0	0	0	0	0	0	0	0	0	0	0	0	0	0	0	0	0	0	0	0	0	0	0	0	0	0	0	0	0	0	0	0	0	0	0	1	0	0	0
ATP6V0C__chr16	22,06	0	19,04	33,13	34,14	29,1	10,01	0	49,29	28,09	20,05	0	27,09	13,02	0	28,09	0	26,08	0	39,18	20,05	48,28	0	0	48,28	0	13,02	6	14,02	20,05	35,15	0	61,45	23,06	0	0	0	0	0	0	0	0	2	21,05	25,07	24,07	12,02	20,05	55,37
ATP6V0D1__chr16	8,01	1	4	7,01	5	3	5	0	6	2	2	0	2	4	0	5	0	4	0	11,01	5	6	0	0	13,02	0	0	1	3	2	4	0	7,01	3	0	0	0	0	0	0	0	0	0	2	7,01	1	4	7,01	2
ATP6V0D2__chr8	0	0	0	0	0	0	0	0	0	0	0	0	0	0	0	0	0	0	1	0	0	0	0	0	0	0	0	0	0	0	0	0	0	0	0	0	0	0	0	0	0	0	0	0	0	0	0	0	0
ATP6V0E1__chr5	9,01	0	5	9,01	8,01	4	6	0	12,02	9,01	6	1	2	7,01	0	3	0	3	0	21,05	1	9,01	0	0	13,02	0	5	1	7,01	4	5	0	11,01	2	0	0	0	0	0	0	0	0	0	13,02	11,01	3	4	10,01	7,01
ATP6V0E2-AS1__chr7	0	0	0	0	0	0	0	0	0	0	0	0	0	2	0	0	0	0	0	0	0	0	0	0	0	0	0	0	0	0	0	0	0	0	0	0	0	0	0	0	0	0	0	0	0	0	0	0	0
ATP6V0E2__chr7	0	0	1	1	2	1	0	0	1	0	0	0	3	2	0	2	0	2	0	1	2	4	0	0	2	0	1	0	0	1	4	0	9,01	3	0	0	0	0	0	0	0	0	0	2	0	1	0	0	1
ATP6V1A__chr3	20,05	0	8,01	5	3	10,01	5	0	6	11,01	4	0	5	9,01	0	7,01	0	6	0	21,05	8,01	13,02	0	0	11,01	0	4	3	3	9,01	5	0	12,02	4	0	0	0	0	0	0	0	0	1	8,01	16,03	5	4	17,03	12,02
ATP6V1B1__chr2	0	0	0	1	0	0	0	0	1	0	2	0	0	0	0	0	0	0	0	0	0	1	0	0	0	0	2	0	0	0	2	0	2	0	0	0	0	0	0	0	0	0	0	3	0	0	0	3	0
ATP6V1B2__chr8	14,02	0	14,02	22,06	8,01	12,02	4	0	12,02	11,01	8,01	0	8,01	4	0	10,01	0	7,01	0	17,03	8,01	20,05	0	0	30,11	0	6	7,01	7,01	14,02	7,01	0	34,14	12,02	0	1	0	0	0	1	0	0	1	19,04	13,02	5	2	8,01	23,06
ATP6V1C1__chr8	3	0	0	2	0	1	1	0	5	0	0	0	3	0	0	1	0	1	0	3	1	5	0	0	4	0	0	2	0	1	4	0	4	1	0	0	0	0	0	0	0	0	0	1	4	2	0	0	3
ATP6V1D__chr14	6	0	1	11,01	3	6	3	0	9,01	5	3	0	1	5	0	2	0	2	0	9,01	3	13,02	0	0	10,01	0	0	4	0	3	6	0	8,01	6	0	0	0	0	0	0	0	0	0	5	3	2	2	2	10,01
ATP6V1E1__chr22	5	0	4	7,01	7,01	0	4	0	11,01	6	5	0	4	7,01	0	5	0	7,01	0	9,01	5	15,03	0	0	4	0	0	6	4	3	9,01	0	9,01	4	0	0	0	0	0	0	0	0	0	7,01	14,02	4	3	15,03	11,01
ATP6V1E2__chr2	0	0	0	0	0	0	0	0	0	1	0	0	1	0	0	0	0	0	0	0	0	0	0	0	0	0	0	0	0	0	0	0	0	0	0	0	0	0	0	0	0	0	0	0	0	0	0	0	0
ATP6V1F__chr7	9,01	0	8,01	14,02	6	16,03	3	0	9,01	4	8,01	0	6	6	0	13,02	0	3	0	9,01	4	12,02	0	0	9,01	0	2	5	2	4	9,01	0	7,01	3	0	0	0	0	0	0	1	0	3	9,01	5	7,01	6	5	10,01
ATP6V1G1__chr9	2	0	2	2	5	4	2	0	4	3	2	0	1	6	0	3	0	2	0	3	2	13,02	0	0	5	0	4	1	1	9,01	3	0	4	2	0	0	0	0	0	0	0	0	0	2	7,01	1	7,01	3	5
ATP6V1G2__chr6	0	0	0	2	0	0	0	0	0	0	0	0	1	0	0	0	0	0	0	0	0	0	0	0	0	0	0	0	0	0	0	0	0	0	0	0	0	0	0	0	0	0	0	2	1	0	0	1	0
ATP6V1G3__chr1	0	0	0	0	0	0	0	0	0	0	0	0	0	0	0	0	0	0	0	0	0	0	0	0	0	0	0	0	0	0	0	0	0	0	0	0	0	0	0	0	0	0	0	0	0	0	0	0	0
ATP6V1H__chr8	9,01	0	1	11,01	3	1	1	0	6	6	2	0	7,01	4	0	2	0	3	0	1	3	4	0	0	4	0	3	0	3	5	1	0	5	3	0	0	0	0	1	0	0	0	0	9,01	7,01	0	1	5	8,01
ATP7A__chrX	1	0	1	0	0	0	0	0	1	0	0	0	0	0	0	0	0	1	0	0	0	4	0	0	0	0	0	0	0	3	1	0	0	0	0	0	0	0	0	0	0	0	0	2	1	0	0	1	0
ATP7B__chr13	0	0	0	0	0	0	0	0	0	0	0	0	0	0	0	0	0	0	0	0	0	0	0	0	0	0	0	0	0	0	0	0	0	0	0	0	0	0	0	0	0	0	0	0	0	0	0	0	0
ATP8A1__chr4	0	0	0	0	0	0	0	0	0	0	0	0	0	0	0	0	0	0	0	0	0	0	0	0	0	0	0	0	0	0	0	0	0	0	0	0	0	0	0	0	0	0	0	0	0	0	0	0	0
ATP8A2__chr13	0	0	0	0	0	0	0	0	0	0	0	0	0	0	0	0	0	0	0	0	0	0	0	0	0	0	0	0	0	0	0	0	0	0	0	0	0	0	0	0	0	0	0	0	0	0	0	0	0
ATP8B1__chr18	7,01	0	5	4	12,02	4	4	0	1	2	5	0	1	10,01	0	0	0	4	0	11,01	4	2	0	0	5	0	0	1	2	6	2	0	9,01	6	0	0	0	0	0	0	0	0	0	3	1	3	0	2	12,02
ATP8B2__chr1	1	0	0	1	1	0	0	0	0	1	0	0	0	1	0	1	0	1	0	1	1	0	0	0	0	0	0	0	0	1	1	0	0	0	0	0	0	0	0	0	0	0	0	0	0	0	0	0	1
ATP8B4__chr15	0	0	0	0	0	0	0	0	0	0	0	0	0	0	0	0	0	0	0	0	0	0	0	0	0	0	0	0	0	0	0	0	0	0	0	0	0	0	0	0	0	0	0	0	0	0	0	0	0
ATP8B5P__chr9	0	0	0	0	0	0	0	0	0	0	0	0	1	0	0	0	0	0	0	0	0	0	0	0	0	0	0	0	0	0	0	0	0	0	0	0	0	0	0	0	0	0	0	0	0	0	0	0	0
ATP9A__chr20	0	0	2	5	2	0	1	0	0	0	0	0	0	0	0	0	0	0	0	2	1	1	0	0	1	0	1	2	0	1	0	0	0	0	0	1	0	0	0	0	0	0	0	4	1	0	0	1	2
ATP9B__chr18	2	0	0	1	0	0	2	0	1	4	0	0	0	0	0	1	0	0	0	3	0	0	0	0	1	0	0	1	0	0	1	0	0	0	0	0	0	0	0	0	0	0	0	0	1	1	0	0	0
ATPAF1__chr1	6	0	1	5	3	1	1	0	5	5	1	0	4	2	0	0	0	0	0	4	3	4	0	0	4	1	0	3	1	0	4	0	6	0	0	0	1	0	0	0	0	0	0	0	0	1	3	1	0
ATPAF2__chr17	2	0	1	0	0	1	0	0	1	0	0	0	1	2	0	0	0	1	0	1	0	0	0	0	1	0	0	1	0	1	1	0	1	0	0	0	0	0	0	0	0	0	0	1	1	0	0	0	0
ATPBD4-AS1__chr15	0	0	0	0	0	0	1	0	0	0	0	0	0	0	0	0	0	0	0	0	0	0	0	0	0	0	0	0	0	0	0	0	0	0	0	0	0	0	0	0	0	0	0	0	2	0	0	0	0
ATPBD4__chr15	0	0	1	0	0	1	0	0	2	0	0	0	0	0	0	0	0	1	0	1	0	2	0	0	0	0	0	0	1	1	0	0	1	0	0	0	0	0	0	0	0	0	0	1	0	1	0	1	0
ATPIF1__chr1	7,01	0	4	15,03	8,01	8,01	4	0	25,07	14,02	8,01	0	6	5	0	13,02	1	9,01	0	14,02	7,01	14,02	0	0	11,01	0	2	8,01	1	10,01	12,02	0	16,03	8,01	0	0	0	0	1	0	0	0	0	8,01	8,01	10,01	7,01	6	10,01
ATRAID__chr2	9,01	0	2	13,02	6	2	3	0	8,01	9,01	3	0	1	7,01	0	4	0	7,01	0	8,01	7,01	16,03	0	0	11,01	0	4	2	1	3	3	0	6	3	0	0	0	0	0	1	0	0	0	4	7,01	4	2	6	10,01
ATRIP__chr3	4	0	0	0	0	0	0	0	1	2	0	0	0	0	0	0	0	0	0	0	0	0	0	0	0	0	0	0	0	0	0	0	1	0	0	0	0	0	0	0	0	0	0	0	0	0	0	0	1
ATRNL1__chr10	7,01	0	1	1	0	0	1	0	6	2	0	0	1	3	0	1	0	2	0	1	1	2	0	0	1	0	0	1	0	0	1	0	2	0	0	0	0	0	0	0	0	0	0	0	0	1	0	2	0
ATRN__chr20	1	0	1	2	1	1	0	0	1	1	1	0	2	5	0	1	0	1	0	2	0	3	0	0	1	0	0	0	0	0	1	0	4	1	0	0	0	0	1	0	0	0	0	1	2	0	0	1	1
ATRX__chrX	7,01	0	7,01	10,01	5	4	7,01	0	12,02	7,01	4	0	4	5	0	2	0	9,01	0	19,04	7,01	19,04	0	0	9,01	0	3	4	10,01	7,01	9,01	0	10,01	5	0	0	0	0	0	0	0	0	2	12,02	7,01	6	4	11,01	13,02
ATR__chr3	5	0	3	2	3	1	1	0	2	2	1	0	3	1	0	2	0	1	0	0	2	2	0	0	4	0	2	1	0	1	1	0	1	0	0	0	0	0	0	0	1	0	0	1	1	0	2	2	2
ATXN10__chr22	20,05	2	2	12,02	8,01	5	3	0	10,01	13,02	9,01	0	7,01	6	0	12,02	0	9,01	0	14,02	3	15,03	0	0	15,03	0	1	3	0	5	19,04	0	11,01	7,01	0	0	0	0	0	0	0	0	0	12,02	10,01	14,02	5	1	15,03
ATXN1L__chr16	1	0	0	2	0	2	0	0	2	0	0	0	1	0	0	2	0	0	0	0	1	5	0	0	3	0	1	0	0	1	2	0	1	0	0	0	0	0	0	0	0	0	0	1	0	1	1	0	1
ATXN1__chr6	3	0	1	1	1	2	0	0	3	0	0	0	0	1	0	0	0	2	0	3	2	1	0	0	3	0	2	0	1	0	1	0	1	3	0	0	0	0	0	0	0	0	0	9,01	1	0	2	8,01	7,01
ATXN2L__chr16	17,03	0	4	19,04	9,01	4	3	0	29,1	14,02	7,01	0	8,01	8,01	0	8,01	0	9,01	0	14,02	13,02	13,02	0	0	12,02	0	1	6	8,01	8,01	12,02	0	11,01	13,02	0	0	1	0	0	0	0	0	0	4	8,01	6	3	6	8,01
ATXN2__chr12	14,02	0	7,01	11,01	11,01	11,01	6	0	3	8,01	11,01	0	5	7,01	0	6	0	13,02	0	20,05	14,02	9,01	0	0	14,02	0	6	2	4	9,01	8,01	0	12,02	17,03	0	3	0	0	0	0	0	0	0	4	14,02	7,01	7,01	7,01	16,03
ATXN3__chr14	0	0	0	0	0	0	0	0	1	2	0	0	0	2	0	3	0	1	0	5	0	0	0	0	3	0	1	0	0	0	0	0	1	1	0	0	0	0	0	0	0	0	0	0	0	1	0	0	0
ATXN7L1__chr7	1	0	0	0	0	0	0	0	0	0	1	0	0	1	0	0	0	0	0	2	0	3	0	0	0	0	0	0	0	0	0	0	0	1	0	0	0	0	0	0	0	0	0	1	2	0	0	2	0
ATXN7L2__chr1	0	0	0	0	1	1	0	0	2	0	1	0	0	0	0	0	0	0	0	1	0	0	0	0	0	0	0	0	0	0	0	0	0	0	0	0	0	0	0	0	0	0	0	0	1	1	1	1	0
ATXN7L3B__chr12	4	0	1	10,01	10,01	6	5	0	6	5	3	1	1	8,01	0	3	0	5	0	10,01	3	10,01	0	0	12,02	0	5	1	1	2	6	0	7,01	5	0	0	0	0	0	0	0	0	0	3	15,03	7,01	2	9,01	11,01
ATXN7L3__chr17	4	0	6	3	7,01	4	2	0	7,01	2	2	0	2	3	0	1	0	1	0	4	1	2	0	0	5	0	1	0	0	4	2	0	11,01	2	0	0	1	0	0	0	0	0	0	2	1	0	0	3	3
ATXN7__chr3	0	0	0	1	1	0	0	0	0	0	1	0	0	0	0	1	0	1	0	0	0	1	0	0	2	0	1	0	1	2	0	0	0	2	0	0	0	0	0	0	0	0	0	0	0	0	0	1	0
ATXN8OS__chr13	1	0	0	0	1	0	0	0	0	0	1	0	0	0	0	0	0	0	0	0	0	0	0	0	2	0	0	1	0	0	0	0	0	0	0	0	0	0	0	0	0	0	0	0	0	0	0	0	0
AUH__chr9	2	0	0	0	1	0	0	0	2	0	0	0	0	0	0	0	0	1	0	2	1	2	0	0	0	0	0	0	1	0	0	0	5	0	0	0	0	0	0	0	0	0	0	0	1	0	0	1	0
AUNIP__chr1	1	0	0	0	0	0	0	0	0	0	0	0	0	0	0	0	0	1	0	0	1	0	0	0	0	0	0	0	0	0	2	0	0	0	0	0	0	0	0	0	0	0	0	0	0	1	0	0	0
AUP1__chr2	6	0	1	15,03	3	6	0	0	6	5	1	0	2	4	0	7,01	0	4	0	10,01	1	5	0	0	12,02	0	2	0	0	2	5	0	7,01	2	0	1	0	0	0	0	0	0	0	3	4	7,01	3	4	6
AURKAIP1__chr1	5	0	2	8,01	7,01	2	1	0	9,01	2	2	0	6	3	0	12,02	0	2	0	4	4	10,01	0	0	9,01	0	2	2	0	2	7,01	0	7,01	3	0	0	0	0	0	0	0	0	0	2	5	4	1	4	7,01
AURKAPS1__chr1	0	0	0	0	0	0	0	0	0	0	0	0	0	0	0	0	0	0	0	0	0	0	0	0	0	0	0	0	0	0	0	0	0	0	0	0	0	0	0	0	0	0	0	0	0	0	0	0	0
AURKA__chr20	13,02	0	0	5	0	0	0	0	43,22	9,01	0	0	1	0	0	7,01	0	0	0	0	2	46,25	0	0	19,04	0	0	1	0	0	4	0	19,04	0	0	0	0	0	0	0	0	0	0	0	1	6	1	0	27,09
AURKB__chr17	12,02	0	0	1	2	0	1	0	21,05	4	0	0	0	2	0	9,01	0	0	0	0	0	10,01	0	0	25,07	0	0	0	0	0	1	0	34,14	0	0	0	0	0	0	1	0	0	1	0	0	1	2	0	20,05
AURKC__chr19	0	0	0	0	0	0	0	0	0	0	0	0	0	0	0	0	0	0	0	0	0	0	0	0	0	0	0	0	0	0	0	0	0	1	0	0	0	0	0	0	0	0	0	0	0	0	0	0	0
AUTS2__chr7	0	0	0	0	0	0	0	0	0	3	0	0	1	1	0	1	0	0	0	4	3	1	0	0	0	0	0	2	0	0	1	0	0	0	0	0	0	0	0	0	0	0	0	0	0	0	0	0	0
AVEN__chr15	0	0	0	2	2	3	0	0	8,01	1	1	0	1	0	0	1	0	1	0	4	5	0	0	0	3	0	0	1	0	1	4	0	5	2	0	0	0	0	0	0	1	0	1	0	0	0	1	1	4
AVIL__chr12	0	0	0	0	0	0	0	0	1	0	0	0	0	0	0	0	0	0	0	0	0	0	0	0	0	0	0	0	0	1	0	0	0	0	0	0	0	0	0	0	0	0	0	0	0	1	0	3	0
AVL9__chr7	0	0	1	0	0	0	0	0	0	0	0	0	0	0	0	1	0	0	0	1	0	0	0	0	1	0	0	0	0	0	0	0	0	0	0	0	0	0	0	0	0	0	0	0	0	1	0	0	1
AVPI1__chr10	1	0	0	3	1	0	0	0	0	1	2	0	2	1	0	0	0	0	0	1	2	0	0	0	3	0	1	0	1	1	3	0	2	0	0	0	0	0	0	0	0	0	0	0	0	0	1	0	2
AXIN1__chr16	0	0	1	1	2	0	0	0	1	0	0	0	1	2	0	1	0	0	0	2	1	3	0	0	0	0	0	0	0	4	2	0	2	1	0	0	0	0	0	0	0	0	0	0	2	1	0	2	0
AXIN2__chr17	0	0	0	0	0	0	0	0	0	0	0	0	0	0	0	0	0	0	0	0	0	0	0	0	0	0	0	0	0	0	0	0	0	0	0	0	0	0	0	0	0	0	0	0	0	0	0	0	0
AXL__chr19	70,6	1	16,03	128,99	53,34	96,11	10,01	0	106,36	66,53	46,25	0	37,16	33,13	1	80,78	0	43,22	1	85,88	59,42	46,25	0	0	82,82	0	8,01	25,07	18,04	18,04	51,31	0	136,22	26,08	0	0	2	1	0	0	0	1	1	26,08	18,04	44,23	20,05	25,07	66,53
AZI1__chr17	1	0	0	0	0	1	0	0	0	0	1	0	0	0	0	0	0	0	0	2	0	1	0	0	1	0	0	0	0	0	0	0	1	0	0	0	0	0	0	0	0	0	0	0	0	0	0	0	1
AZI2__chr3	6	0	2	4	2	0	0	0	5	1	1	0	0	2	0	6	0	1	0	5	6	7,01	0	0	3	0	1	1	1	2	3	0	3	3	0	0	0	0	0	0	0	0	0	2	1	0	0	3	3
AZIN1__chr8	7,01	0	2	15,03	10,01	10,01	2	0	13,02	15,03	4	0	8,01	5	0	8,01	0	5	0	14,02	8,01	18,04	0	0	11,01	0	1	2	1	0	7,01	0	11,01	4	0	0	0	0	0	0	0	0	0	10,01	2	6	3	8,01	11,01
B2M__chr15	68,56	1	35,15	52,33	48,28	28,09	28,09	0	34,14	25,07	25,07	0	15,03	42,21	0	32,12	0	41,2	0	84,86	30,11	93,04	0	0	47,27	0	37,16	9,01	6	38,17	48,28	0	35,15	37,16	0	0	0	1	0	1	0	0	2	78,74	42,21	28,09	19,04	73,65	58,41
B3GALNT1__chr3	1	0	1	0	1	0	0	0	2	2	0	0	0	1	0	0	0	2	0	4	1	0	0	0	0	0	2	0	1	2	4	0	0	2	0	0	0	0	0	0	0	0	0	2	0	3	0	4	3
B3GALNT2__chr1	3	0	0	2	2	0	2	0	5	1	0	0	1	0	0	4	0	2	0	3	3	1	0	0	2	0	0	0	0	1	6	0	2	1	0	0	0	0	0	0	0	0	0	0	0	3	1	0	3
B3GALT2__chr1	0	0	0	0	0	0	0	0	0	0	0	0	0	0	0	0	0	0	0	0	0	0	0	0	0	0	0	0	0	0	0	0	0	0	0	0	0	0	0	0	0	0	0	0	0	0	0	0	0
B3GALT4__chr6	0	0	0	0	0	0	0	0	0	0	0	0	0	0	0	0	0	0	0	0	0	0	0	0	0	0	0	0	0	0	0	0	0	0	0	0	0	0	0	0	0	0	0	0	0	0	0	0	0
B3GALT6__chr1	2	0	0	0	2	3	1	0	3	0	0	0	0	2	0	3	0	0	0	1	0	1	0	0	2	0	0	2	1	2	1	0	4	2	0	0	0	0	0	1	0	0	0	2	3	3	1	2	2
B3GALTL__chr13	8,01	0	0	0	2	0	0	0	2	2	1	0	0	2	0	2	0	0	0	2	3	1	0	0	1	0	0	0	1	1	5	0	3	1	0	0	0	0	1	0	0	0	0	1	0	1	0	3	4
B3GAT1__chr11	0	0	0	0	0	0	0	0	0	0	0	0	0	0	0	0	0	0	0	0	0	0	0	0	0	0	0	0	0	0	0	0	0	0	0	0	0	0	0	0	0	0	0	0	0	0	0	0	0
B3GAT3__chr11	0	0	0	2	0	2	0	0	2	0	0	0	0	2	0	1	0	1	0	1	0	2	0	0	4	0	0	0	0	1	0	0	1	1	0	0	0	0	0	0	0	0	0	0	1	0	0	1	2
B3GNT1__chr11	0	0	1	2	2	2	1	0	1	0	1	0	1	2	0	3	0	1	0	4	2	5	0	0	3	0	3	1	0	1	3	0	1	1	0	0	0	0	0	0	0	0	0	5	7,01	2	0	4	1
B3GNT2__chr2	0	0	3	3	0	0	0	0	1	0	0	0	0	0	0	0	0	0	0	2	0	0	0	0	1	0	0	0	0	0	1	0	1	0	0	0	0	0	0	0	0	0	0	0	1	1	0	0	1
B3GNT4__chr12	0	0	0	0	0	0	0	0	0	0	0	0	0	0	0	0	0	0	0	0	0	0	0	0	0	0	0	0	0	0	0	0	0	0	0	0	0	0	0	0	0	0	0	0	0	0	0	0	0
B3GNT5__chr3	0	0	0	2	0	1	0	0	2	0	0	0	0	3	0	0	0	2	0	0	1	1	0	0	0	0	0	0	0	0	0	0	0	0	0	0	0	0	0	0	0	0	0	0	0	0	0	1	0
B3GNT6__chr11	0	0	0	0	0	0	0	0	0	0	0	0	0	0	0	0	0	0	0	0	0	0	0	0	0	0	0	0	0	0	0	0	0	0	0	0	0	0	0	0	0	0	0	0	0	0	0	0	0
B3GNT7__chr2	0	0	0	0	0	0	0	0	0	0	0	0	1	0	0	0	0	0	0	0	0	0	0	0	0	0	1	0	0	0	0	0	0	0	0	0	0	0	0	0	0	0	0	0	0	0	0	0	2
B3GNT9__chr16	1	0	0	0	0	0	0	0	1	0	0	0	0	0	0	0	0	1	0	1	1	0	0	0	1	0	0	0	0	0	1	0	0	0	0	0	0	0	0	0	0	0	0	0	0	0	0	0	0
B3GNTL1__chr17	1	0	1	0	2	0	0	0	1	4	0	0	0	0	0	0	0	1	0	0	0	2	0	0	2	0	0	0	0	0	0	0	0	0	0	0	0	0	0	0	0	0	0	0	0	0	0	0	0
B4GALNT1__chr12	1	0	0	0	0	0	0	0	0	0	0	0	0	0	0	0	0	0	0	1	0	1	0	0	1	0	0	0	0	0	0	0	0	0	0	0	0	0	0	0	0	0	0	0	0	0	0	0	1
B4GALNT4__chr11	1	0	0	0	1	0	1	0	1	1	0	0	0	1	0	2	0	0	0	1	0	1	0	0	0	0	0	0	0	4	0	0	3	0	0	1	0	0	0	0	0	0	0	0	2	0	0	1	1
B4GALT1__chr9	3	0	6	6	3	2	7,01	0	6	9,01	3	0	1	3	0	5	0	4	0	8,01	8,01	4	0	0	2	0	1	0	2	3	2	0	3	2	0	0	0	0	0	1	0	0	0	5	6	5	2	6	4
B4GALT2__chr1	7,01	0	0	6	1	5	0	0	9,01	3	3	0	1	2	0	5	0	1	0	11,01	3	5	0	0	8,01	0	1	0	0	0	6	0	6	1	0	0	0	0	0	0	0	0	0	0	1	0	4	3	9,01
B4GALT3__chr1	2	0	1	2	1	1	0	0	6	3	0	0	3	0	0	2	0	0	0	3	0	3	0	0	4	0	2	2	0	2	4	0	4	1	0	0	0	0	1	0	0	0	0	2	1	1	1	0	3
B4GALT4__chr3	1	0	0	1	0	0	1	0	2	1	0	0	0	0	0	0	0	0	0	1	0	3	0	0	0	0	0	0	0	2	2	0	0	0	0	0	0	0	0	1	0	0	0	0	0	0	0	0	0
B4GALT5__chr20	7,01	0	6	13,02	4	3	3	0	17,03	9,01	1	0	5	2	1	7,01	0	6	0	14,02	6	9,01	0	0	12,02	0	6	1	2	2	7,01	0	10,01	6	1	0	0	0	0	0	1	0	0	4	26,08	5	1	23,06	4
B4GALT6__chr18	1	0	1	2	0	0	0	0	2	2	0	0	1	0	0	0	0	1	0	2	1	2	0	0	1	0	0	0	0	0	3	0	1	0	0	2	0	0	0	0	0	0	0	2	0	1	2	0	3
B4GALT7__chr5	0	0	1	1	0	0	0	0	1	2	1	0	1	1	0	1	0	2	0	1	0	0	0	0	0	0	0	0	0	0	1	0	0	1	0	0	0	0	0	0	0	0	0	0	4	1	0	0	0
B9D1__chr17	2	0	0	1	0	3	0	0	1	0	1	0	1	1	0	0	0	2	0	2	0	1	0	0	0	0	0	0	3	0	0	0	1	0	0	0	0	0	0	0	0	0	0	2	2	1	1	1	0
B9D2__chr19	0	0	0	0	0	0	0	0	0	1	1	0	0	0	0	1	0	0	0	0	0	1	0	0	3	0	0	0	0	0	0	0	0	0	0	0	0	0	0	0	0	0	0	0	0	0	0	0	0
BAALC__chr8	0	0	0	0	0	0	0	0	0	0	0	0	0	0	0	0	0	0	0	0	0	0	0	0	0	0	0	0	0	0	0	0	0	0	0	0	0	0	0	0	0	0	0	0	0	0	0	0	0
BAAT__chr9	0	0	0	0	0	0	0	0	0	0	0	0	0	0	0	0	0	0	0	0	0	0	0	0	0	0	0	0	0	0	1	0	0	0	0	0	0	0	1	0	0	0	0	0	0	0	0	0	0
BABAM1__chr19	9,01	0	1	9,01	9,01	7,01	2	0	5	9,01	9,01	0	3	7,01	0	11,01	0	3	0	8,01	9,01	12,02	0	0	8,01	0	2	4	3	4	8,01	0	9,01	4	0	0	0	0	0	0	0	0	1	5	4	7,01	3	5	14,02
BACE1-AS__chr11	0	0	0	0	0	0	0	0	0	0	0	0	0	0	0	0	0	1	0	0	0	0	0	0	0	0	0	0	0	0	0	0	0	0	0	0	0	0	0	0	0	0	0	0	0	0	0	0	0
BACE1__chr11	8,01	0	5	7,01	4	2	0	0	7,01	1	0	0	1	4	0	1	0	4	0	4	3	7,01	0	0	5	0	0	0	2	1	3	0	6	1	0	0	0	0	0	0	0	0	0	3	4	4	2	5	4
BACE2__chr21	6	0	3	19,04	6	5	6	0	4	5	3	0	4	6	0	6	1	4	0	7,01	9,01	3	0	0	7,01	0	4	6	1	4	6	0	8,01	2	0	0	0	0	1	0	0	0	0	2	9,01	2	1	8,01	15,03
BACH1__chr21	0	0	0	4	3	1	0	0	1	1	1	0	0	0	0	1	0	1	0	2	1	2	0	0	4	0	2	0	3	0	1	0	3	0	0	0	0	0	0	0	0	0	0	1	1	2	1	1	1
BACH2__chr6	0	0	0	0	0	0	0	0	0	0	0	0	0	0	0	0	0	0	0	0	0	0	0	0	0	0	0	0	0	0	0	0	0	0	0	0	0	0	0	0	0	0	0	0	0	0	0	0	0
BAD__chr11	1	0	0	6	3	3	1	0	5	6	1	0	0	3	0	3	0	4	0	8,01	2	4	0	0	2	0	1	1	1	2	2	0	9,01	1	0	0	0	0	0	0	0	0	0	3	5	1	2	3	8,01
BAG1__chr9	2	0	0	0	1	5	1	0	0	1	1	0	2	1	1	2	0	0	0	0	0	3	0	0	0	0	0	1	1	0	0	0	1	1	0	0	0	0	0	0	0	0	0	1	0	1	0	1	0
BAG2__chr6	8,01	0	2	10,01	4	1	0	0	4	2	5	0	1	4	1	6	0	6	0	3	4	3	0	0	2	0	0	5	0	2	8,01	0	6	5	0	0	0	0	0	0	0	0	1	2	1	0	0	1	4
BAG3__chr10	20,05	0	6	17,03	9,01	4	3	0	27,09	15,03	6	0	2	11,01	0	12,02	1	11,01	1	17,03	9,01	19,04	0	0	9,01	0	2	10,01	5	6	6	0	13,02	7,01	0	0	0	0	0	0	0	0	0	10,01	3	10,01	2	17,03	16,03
BAG4__chr8	1	0	0	5	0	0	0	0	0	1	2	0	0	0	0	2	0	1	0	2	2	5	0	0	0	0	1	2	1	0	0	0	3	0	0	0	0	0	0	0	0	0	0	2	3	0	0	0	3
BAG5__chr14	2	0	2	7,01	3	7,01	0	0	7,01	1	0	0	2	2	0	6	0	4	0	4	2	5	0	0	4	0	0	1	4	0	4	0	7,01	1	0	0	0	0	0	0	0	0	0	4	5	3	0	1	6
BAG6__chr6	10,01	1	3	10,01	6	6	3	0	5	5	2	0	3	9,01	0	8,01	0	4	0	6	7,01	5	0	0	10,01	0	4	1	3	3	6	0	7,01	3	0	0	0	0	0	0	0	0	0	7,01	3	3	6	6	6
BAHCC1__chr17	1	0	0	1	0	0	0	0	3	0	0	0	0	0	0	2	0	0	0	2	0	0	0	0	0	0	0	0	0	0	0	0	1	0	0	0	0	0	0	0	0	0	0	0	0	0	0	0	0
BAHD1__chr15	1	0	1	8,01	1	0	1	0	4	3	3	0	6	1	0	2	0	0	0	1	4	7,01	0	1	3	0	0	0	1	1	4	0	5	0	1	0	0	0	0	0	0	0	0	1	0	2	0	4	1
BAI2__chr1	1	0	1	2	1	0	0	0	2	0	0	0	1	2	0	3	0	0	0	3	0	1	0	0	0	0	0	0	1	1	2	0	0	1	0	0	0	0	0	0	0	0	0	0	5	1	0	2	2
BAI3__chr6	0	0	0	0	0	0	0	0	0	0	0	0	0	0	0	0	0	0	0	0	0	0	0	0	0	0	0	0	0	0	0	0	0	0	0	0	0	0	0	0	0	0	0	0	0	0	0	0	0
BAIAP2-AS1__chr17	0	0	0	0	0	0	0	0	0	0	1	0	0	0	0	1	0	0	0	2	1	0	0	0	0	0	0	0	0	0	0	0	0	0	0	0	0	0	0	0	0	0	0	0	3	0	0	0	1
BAIAP2L1__chr7	2	0	0	0	0	0	0	0	1	3	0	0	0	3	0	1	0	1	0	1	0	0	0	0	2	0	1	0	1	0	0	0	1	0	0	0	0	0	0	0	0	0	0	0	4	0	0	3	2
BAIAP2L2__chr22	0	0	0	0	0	0	0	0	0	0	0	0	0	0	0	0	0	0	0	0	0	0	0	0	0	0	0	0	0	0	0	0	0	0	0	0	0	0	0	0	0	0	0	0	0	0	0	0	0
BAIAP2__chr17	1	0	6	2	3	3	4	0	2	3	2	0	2	2	0	1	0	3	0	4	1	5	0	0	0	0	0	1	1	4	1	0	2	1	0	0	0	0	0	0	0	0	0	1	1	0	1	3	2
BAK1__chr6	2	0	1	1	2	0	0	0	0	3	0	0	1	1	0	4	0	1	0	1	1	0	0	0	1	0	0	0	0	1	0	0	2	1	0	0	0	0	0	0	0	0	0	0	0	1	0	1	0
BAMBI__chr10	2	0	1	1	0	0	1	0	3	0	1	0	1	1	0	0	0	2	0	8,01	0	0	0	0	0	0	0	0	0	2	3	0	2	0	0	0	0	0	0	0	0	0	1	2	2	2	0	1	0
BANF1__chr11	16,03	0	7,01	36,15	16,03	15,03	7,01	0	30,11	19,04	8,01	0	19,04	16,03	1	28,09	0	19,04	0	28,09	8,01	18,04	0	0	23,06	1	4	11,01	4	2	19,04	0	35,15	11,01	0	1	1	1	4	0	0	0	2	8,01	13,02	12,02	16,03	8,01	31,11
BANK1__chr4	0	0	0	0	0	0	0	0	0	0	0	0	0	0	0	0	0	0	0	0	1	0	0	0	0	0	0	0	0	1	2	0	1	0	0	0	0	0	0	0	0	0	0	0	0	0	0	0	1
BANP__chr16	0	0	0	0	0	0	0	0	4	1	0	0	1	1	0	0	0	0	0	0	0	1	0	0	0	0	0	0	0	0	0	0	1	1	0	0	0	0	0	0	0	0	0	0	3	0	0	0	0
BAP1__chr3	2	0	1	2	2	2	1	0	5	4	0	0	0	4	0	2	0	1	0	5	1	0	0	0	3	0	1	0	1	0	2	0	0	1	0	0	0	0	0	0	0	0	0	1	2	0	2	0	1
BARD1__chr2	4	0	0	0	0	1	0	0	0	0	0	0	0	0	0	1	0	0	0	0	4	0	0	0	1	0	0	0	0	0	0	0	1	0	0	0	0	0	0	0	0	0	0	0	0	0	0	1	2
BASP1P1__chr13	0	0	0	0	0	0	0	0	0	0	0	0	0	0	0	0	0	0	0	0	0	0	0	0	0	0	0	0	0	0	0	0	0	0	0	0	0	0	0	0	0	0	0	0	0	0	0	0	0
BASP1__chr5	23,06	0	6	48,28	19,04	18,04	8,01	0	39,18	18,04	13,02	0	8,01	22,06	0	12,02	0	14,02	0	17,03	19,04	22,06	0	0	28,09	0	7,01	8,01	4	9,01	18,04	0	42,21	11,01	1	0	0	0	0	0	0	0	1	12,02	19,04	18,04	8,01	6	22,06
BATF2__chr11	0	0	0	0	0	0	0	0	0	0	0	0	0	1	0	0	0	0	0	0	0	0	0	0	1	0	0	0	0	0	0	0	0	0	0	0	0	0	0	0	0	0	0	0	0	0	0	0	0
BATF3__chr1	0	0	0	0	0	0	0	0	0	0	0	0	0	0	0	0	0	0	0	0	1	0	0	0	1	0	0	0	0	0	1	0	0	0	0	0	0	0	0	0	0	0	0	0	0	1	0	0	0
BAX__chr19	4	0	0	0	1	1	1	0	4	1	0	0	0	1	0	2	0	0	0	1	0	3	0	0	5	0	0	1	0	1	1	0	2	0	0	0	0	0	0	0	0	0	0	0	2	0	1	0	2
BAZ1A__chr14	7,01	0	4	6	4	6	6	0	7,01	6	6	0	4	3	0	3	1	6	0	2	8,01	12,02	0	0	7,01	0	1	1	3	3	9,01	0	14,02	3	0	0	0	0	0	1	1	0	0	2	1	8,01	2	6	4
BAZ1B__chr7	10,01	0	6	9,01	4	1	5	0	5	5	2	0	1	4	0	5	0	5	0	7,01	4	18,04	0	0	15,03	0	1	4	1	4	7,01	0	16,03	3	0	0	0	1	1	0	0	0	1	1	5	2	1	3	8,01
BAZ2A__chr12	5	0	4	6	4	1	2	0	4	2	2	1	5	4	1	1	0	3	0	8,01	0	2	0	0	6	0	4	0	3	6	0	0	3	3	0	0	2	0	0	0	0	0	0	2	10,01	4	0	3	10,01
BAZ2B__chr2	2	0	0	0	0	2	1	0	1	1	2	0	1	2	0	0	0	0	0	8,01	2	2	0	0	1	0	2	0	1	0	0	0	1	2	0	0	0	0	0	0	0	0	0	3	1	2	0	2	1
BBC3__chr19	0	0	0	1	0	1	0	0	1	0	0	0	1	0	0	0	0	0	0	0	0	0	0	0	2	0	1	0	0	0	0	0	1	0	0	0	0	0	0	0	0	0	0	0	1	0	0	0	0
BBIP1__chr10	3	1	0	6	1	2	0	0	0	0	1	0	0	1	0	0	0	1	0	1	1	3	0	0	2	0	0	1	0	1	4	0	2	2	0	0	0	0	0	0	0	0	0	1	2	1	2	2	2
BBOX1__chr11	0	0	0	0	0	0	0	0	0	0	0	0	0	0	0	0	0	0	0	0	0	0	0	0	0	0	1	0	0	0	0	0	0	0	0	0	0	0	0	0	0	0	0	1	0	0	0	0	0
BBS10__chr12	2	0	1	3	2	2	1	0	0	4	2	0	0	1	0	0	0	2	0	3	2	0	0	0	1	0	0	1	0	0	0	0	3	0	0	0	0	0	0	0	0	0	0	1	4	2	0	3	0
BBS12__chr4	1	0	0	0	0	0	0	0	0	0	0	0	0	0	0	0	0	0	0	2	0	1	0	0	0	0	0	0	0	0	0	0	0	0	0	0	0	0	0	0	0	0	0	0	0	0	0	1	0
BBS1__chr11	4	0	0	0	0	0	1	0	2	0	0	0	1	3	0	1	0	2	0	2	2	1	0	0	2	0	1	0	0	4	1	0	1	3	0	0	0	0	0	0	0	0	0	4	0	0	1	2	0
BBS2__chr16	1	0	1	2	0	2	1	0	3	1	0	0	0	1	0	1	0	1	0	1	0	2	0	0	3	0	1	0	0	1	1	0	1	1	1	0	0	0	0	0	0	0	0	3	2	0	2	2	5
BBS4__chr15	1	0	0	0	0	1	1	0	2	1	0	0	1	0	0	1	0	0	0	2	1	0	0	0	0	0	0	0	0	0	2	0	0	0	0	0	0	0	1	0	0	0	0	1	7,01	0	1	0	3
BBS5__chr2	0	0	0	0	1	0	0	0	1	1	0	0	0	0	0	0	0	0	0	0	3	0	0	0	1	0	0	0	0	0	1	0	0	0	0	0	0	0	0	0	0	0	0	0	0	0	0	0	0
BBS7__chr4	1	0	0	2	1	1	0	0	0	2	0	0	2	0	0	2	0	0	0	1	0	1	0	0	4	0	0	1	0	0	1	0	3	0	0	0	1	0	0	0	0	0	0	1	0	1	0	0	3
BBS9__chr7	4	0	0	0	1	0	1	0	0	1	3	0	0	0	0	0	0	0	0	0	0	2	0	0	0	0	1	0	1	0	0	0	0	0	0	0	0	0	0	0	0	0	0	4	4	0	0	3	0
BBX__chr3	15,03	0	6	3	2	2	4	0	7,01	0	1	0	1	2	0	5	0	0	0	14,02	8,01	9,01	0	0	6	0	2	2	1	7,01	3	0	7,01	0	0	0	0	0	1	0	0	0	0	4	10,01	1	2	6	9,01
BCAM__chr19	0	0	1	1	0	1	0	0	0	1	0	0	0	0	0	1	0	0	0	0	0	0	0	0	0	0	0	0	0	0	0	0	0	0	0	0	0	0	0	0	0	0	0	1	0	0	0	1	0
BCAP29__chr7	6	0	20,05	9,01	2	3	6	0	23,06	5	4	0	4	3	0	6	0	0	0	10,01	5	9,01	0	0	20,05	0	2	5	3	5	7,01	0	6	10,01	0	0	0	0	0	0	0	0	1	12,02	9,01	7,01	2	6	24,07
BCAP31__chrX	11,01	0	5	33,13	13,02	13,02	8,01	0	33,13	11,01	9,01	0	10,01	12,02	0	17,03	0	8,01	0	20,05	14,02	25,07	0	0	21,05	0	3	1	2	9,01	26,08	1	19,04	8,01	0	2	0	0	0	1	0	0	0	19,04	10,01	9,01	13,02	9,01	13,02
BCAR1__chr16	5	0	5	3	2	0	0	0	9,01	4	2	0	3	5	0	4	0	5	0	5	8,01	5	0	0	3	0	3	0	2	2	4	0	6	7,01	0	0	0	0	0	0	0	0	1	3	5	0	6	6	8,01
BCAR3__chr1	9,01	0	1	3	16,03	2	0	0	5	17,03	3	0	4	3	0	2	0	2	0	9,01	9,01	2	0	0	13,02	0	0	5	4	5	1	0	16,03	7,01	1	0	0	0	0	0	0	0	0	1	1	4	2	3	18,04
BCAS1__chr20	0	0	0	0	0	0	0	0	0	0	0	0	0	0	0	0	0	0	0	0	0	0	0	0	0	0	0	0	0	0	0	0	0	0	0	0	0	0	0	0	0	0	0	0	0	0	0	0	0
BCAS2__chr1	0	0	0	5	2	1	1	0	7,01	1	2	0	2	1	0	1	0	0	0	2	1	4	0	0	3	0	1	0	0	1	1	0	4	1	0	0	0	0	0	0	0	0	0	1	0	2	2	0	2
BCAS3__chr17	0	0	0	0	0	0	0	0	0	0	2	0	1	0	0	0	0	0	0	1	0	2	0	0	0	0	0	0	0	1	0	0	0	0	0	0	0	0	0	0	0	0	0	3	1	0	0	1	0
BCAS4__chr20	0	0	2	2	1	0	0	0	1	0	1	0	0	1	0	0	0	0	0	1	0	1	0	0	3	0	0	1	1	1	0	0	0	0	0	0	0	0	0	0	0	0	0	1	1	0	0	0	0
BCAT1__chr12	35,15	0	18,04	43,22	27,09	37,16	10,01	0	38,17	27,09	8,01	1	15,03	10,01	1	31,11	0	31,11	0	63,48	42,21	15,03	0	0	37,16	0	8,01	10,01	10,01	44,23	36,15	0	62,47	14,02	0	0	0	0	0	0	1	0	0	28,09	40,19	21,05	19,04	17,03	61,45
BCAT2__chr19	1	0	1	2	1	3	2	0	1	1	0	0	1	0	0	4	0	0	0	6	2	1	0	0	2	0	0	0	0	2	0	0	1	0	0	0	0	1	0	0	0	0	1	0	0	2	0	2	2
BCCIP__chr10	4	0	2	20,05	11,01	3	1	0	10,01	12,02	2	0	3	6	0	10,01	0	10,01	0	15,03	9,01	10,01	0	0	15,03	0	1	4	2	1	8,01	0	15,03	6	0	0	0	0	0	0	0	0	0	1	2	11,01	11,01	3	10,01
BCDIN3D-AS1__chr12	0	0	0	1	0	0	0	0	0	0	0	0	0	0	0	0	0	0	0	0	0	0	0	0	0	0	0	0	0	0	0	0	0	0	0	0	0	0	0	0	0	0	0	0	0	1	0	0	0
BCDIN3D__chr12	0	0	0	2	2	0	0	0	0	0	0	0	0	2	0	0	0	0	0	1	0	0	0	0	0	0	0	0	0	1	0	0	0	0	0	0	0	0	0	0	0	0	0	0	0	0	0	0	1
BCHE__chr3	2	0	2	1	1	1	4	0	1	1	3	0	1	6	0	4	0	2	0	0	0	4	0	0	3	0	1	0	1	1	0	0	3	0	0	0	1	0	0	0	0	0	0	8,01	3	0	1	3	4
BCKDHA__chr19	1	0	2	1	1	1	0	0	3	2	1	0	1	0	0	1	0	2	0	1	0	1	0	0	2	0	0	2	1	0	2	0	1	0	0	0	0	0	0	0	0	0	0	0	1	0	0	2	0
BCKDHB__chr6	1	0	1	1	1	0	3	0	4	1	1	0	0	3	0	3	0	3	0	1	2	0	0	0	0	0	0	0	0	0	0	0	0	0	0	0	0	0	0	0	0	0	0	1	1	1	1	0	2
BCKDK__chr16	7,01	0	2	13,02	3	6	2	0	11,01	6	3	0	3	7,01	1	2	0	2	0	16,03	3	7,01	0	0	8,01	0	1	0	3	6	7,01	0	10,01	1	0	0	0	0	0	0	0	0	0	6	2	5	5	3	5
BCL10__chr1	0	0	0	3	3	2	0	0	1	1	0	0	0	1	0	2	0	0	0	2	3	2	0	0	5	0	0	1	2	2	0	0	4	2	0	0	0	0	0	0	0	0	0	2	1	0	2	3	5
BCL11A__chr2	0	0	0	3	0	0	0	0	0	0	0	0	0	0	0	0	0	0	0	0	0	0	0	0	0	0	0	0	0	0	1	0	1	0	0	0	0	0	0	0	0	0	0	0	0	0	0	0	0
BCL11B__chr14	0	0	0	0	0	0	0	0	0	0	0	0	0	0	0	0	0	0	0	0	0	0	0	0	0	0	0	0	0	0	0	0	0	0	0	0	0	0	0	0	0	0	0	0	0	0	0	0	0
BCL2A1__chr15	0	0	0	0	0	0	0	0	0	0	0	0	0	0	0	0	0	0	0	0	0	0	0	0	0	0	0	0	0	0	0	0	0	0	0	0	0	0	0	0	0	0	0	0	0	0	0	0	0
BCL2L11__chr2	2	0	1	1	0	0	0	0	1	0	0	0	0	0	0	1	0	1	0	4	0	0	0	0	0	0	0	0	0	0	3	0	3	1	0	0	0	0	0	0	0	0	0	0	0	0	0	0	1
BCL2L12__chr19	3	0	0	4	2	0	0	0	6	5	0	0	0	1	0	2	0	0	0	0	1	8,01	0	0	0	0	0	3	0	0	0	0	2	0	0	0	0	0	0	0	0	0	0	0	0	1	1	0	4
BCL2L13__chr22	10,01	0	3	5	0	5	4	0	11,01	9,01	7,01	1	6	4	0	2	0	1	0	20,05	3	8,01	0	0	10,01	0	0	2	3	10,01	2	0	3	2	0	0	0	0	0	0	0	0	0	7,01	7,01	9,01	2	2	8,01
BCL2L15__chr1	0	0	0	0	0	0	0	0	0	0	0	0	0	0	0	0	0	0	0	0	0	1	0	0	0	0	0	0	0	0	0	0	0	0	0	0	0	0	0	0	0	0	0	1	0	0	0	0	0
BCL2L1__chr20	6	0	0	4	5	6	2	0	4	7,01	3	0	5	13,02	0	9,01	0	7,01	0	11,01	2	11,01	0	0	13,02	0	5	2	6	7,01	4	0	23,06	2	0	0	0	0	1	0	0	0	0	1	16,03	1	1	5	11,01
BCL2L2__chr14	0	0	1	1	1	5	1	0	1	1	3	0	5	3	0	0	0	1	0	0	0	4	0	0	2	0	0	2	0	2	0	0	1	0	0	0	0	0	0	0	0	0	0	0	3	1	0	0	3
BCL2__chr18	0	0	0	0	1	0	0	0	0	0	0	0	0	0	0	1	0	0	0	0	0	0	0	0	1	0	0	0	0	0	1	0	0	0	0	0	0	0	0	0	0	0	0	0	0	0	0	0	2
BCL3__chr19	0	0	9,01	3	0	0	5	0	1	0	0	0	0	0	0	3	0	2	0	3	0	10,01	0	0	0	0	0	0	2	0	0	0	1	0	0	0	0	0	0	0	0	0	0	3	2	1	0	11,01	1
BCL6__chr3	0	0	2	0	1	0	0	0	2	0	0	0	0	3	0	1	0	0	0	3	1	0	0	0	1	0	2	1	2	3	1	0	0	0	0	1	0	0	0	0	0	0	0	2	1	0	0	0	1
BCL7A__chr12	1	0	0	0	0	0	0	0	3	0	0	0	0	2	0	0	0	0	0	0	0	0	0	0	1	0	0	0	0	0	1	0	0	0	0	0	0	0	0	0	0	0	1	0	0	0	0	0	0
BCL7B__chr7	7,01	0	1	6	3	3	1	0	2	5	1	0	5	3	0	2	0	8,01	0	6	3	0	0	0	5	0	0	1	4	5	2	0	12,02	1	0	0	0	0	0	0	0	0	0	4	0	2	3	1	4
BCL7C__chr16	1	0	0	2	4	3	0	0	6	7,01	1	0	1	4	0	5	0	1	0	3	3	8,01	0	0	6	0	0	1	1	0	3	0	3	1	0	0	0	0	0	0	0	0	1	1	1	0	2	2	4
BCL9L__chr11	2	0	4	8,01	3	7,01	0	0	10,01	8,01	2	0	6	9,01	0	14,02	0	5	0	11,01	3	5	0	0	6	0	2	3	2	4	9,01	0	3	1	1	0	0	0	1	0	0	1	2	6	6	5	3	9,01	6
BCL9__chr1	0	0	0	2	0	0	1	0	1	0	0	0	0	0	0	0	0	0	0	1	0	0	0	0	1	0	0	0	1	2	1	0	0	0	0	0	0	0	0	0	0	0	0	1	1	0	0	0	1
BCLAF1__chr6	20,05	0	8,01	28,09	7,01	11,01	5	0	21,05	23,06	8,01	0	8,01	11,01	0	16,03	0	15,03	0	15,03	12,02	8,01	0	0	20,05	0	2	2	1	6	16,03	1	11,01	1	0	0	0	0	2	0	0	0	0	12,02	8,01	6	8,01	9,01	19,04
BCMO1__chr16	0	0	0	0	0	0	0	0	0	0	0	0	0	0	0	0	0	0	0	0	0	0	0	0	0	0	0	0	0	0	0	0	0	0	0	0	0	0	0	0	0	0	0	0	0	0	0	0	0
BCO2__chr11	0	0	0	0	0	0	0	0	0	0	1	0	0	1	0	0	0	0	0	0	0	0	0	0	0	0	0	0	0	0	0	0	0	1	0	0	0	0	0	0	0	0	0	1	0	0	0	0	0
BCORL1__chrX	0	0	0	0	1	0	0	0	1	0	0	0	1	0	0	2	0	0	0	3	1	1	0	0	0	0	0	0	1	0	2	0	0	0	0	0	0	0	0	1	0	0	0	0	2	1	0	0	0
BCOR__chrX	1	0	1	3	2	0	0	0	2	6	0	0	1	0	0	2	0	2	0	1	3	1	0	0	1	0	2	1	0	0	0	0	1	0	0	0	0	0	0	0	0	0	0	0	2	0	0	0	2
BCR__chr22	0	0	0	2	0	1	1	0	1	0	0	0	0	0	0	2	0	0	0	1	1	2	0	0	1	0	0	0	0	0	0	0	1	0	0	0	0	0	0	0	0	0	0	0	2	2	0	0	4
BCS1L__chr2	2	0	0	4	1	2	0	0	5	2	2	0	0	0	0	1	0	0	0	1	7,01	0	0	0	2	0	0	2	0	1	1	0	4	0	0	0	0	0	0	0	0	0	0	1	1	3	1	0	1
BCYRN1__chrX	9,01	0	3	12,02	4	6	1	0	0	2	0	0	10,01	4	0	2	0	2	0	9,01	15,03	0	0	0	8,01	0	1	6	1	1	0	0	24,07	3	0	0	0	0	0	0	0	0	0	0	1	0	4	1	5
BDH1__chr3	0	0	0	0	1	0	0	0	0	0	0	0	1	0	0	0	0	0	0	0	0	0	0	0	0	0	0	0	0	2	0	0	0	0	0	0	0	0	0	0	0	0	0	0	0	0	0	1	0
BDH2__chr4	5	0	3	5	0	2	6	0	0	3	3	0	1	3	0	1	0	2	0	4	1	2	0	0	2	0	4	0	1	4	2	0	2	0	0	0	0	0	0	0	0	0	1	8,01	1	2	0	2	6
BDNF-AS__chr11	0	0	0	0	0	0	0	0	0	0	0	0	0	0	0	0	0	0	0	0	0	0	0	0	2	0	0	0	0	0	0	0	0	0	0	0	0	0	0	0	0	0	0	0	0	0	0	1	0
BDNF__chr11	3	0	1	4	7,01	0	0	0	2	5	1	0	1	2	0	0	0	0	0	0	2	1	0	0	4	0	0	0	2	0	0	0	0	1	0	0	0	0	0	0	0	0	0	3	2	2	5	1	1
BDP1__chr5	3	0	1	3	6	1	0	0	3	0	2	0	1	2	0	1	0	4	0	2	1	3	0	0	2	0	1	0	0	0	0	0	1	1	0	0	0	0	0	0	0	0	0	1	1	1	4	0	4
BEAN1__chr16	2	0	0	0	0	0	0	0	0	0	0	0	0	0	0	0	0	0	0	0	0	0	0	0	2	0	0	0	0	0	0	0	0	0	0	0	0	0	0	0	0	0	0	1	0	0	0	0	3
BECN1__chr17	0	0	0	0	0	0	0	0	0	0	0	0	0	0	0	0	0	0	0	0	0	0	0	0	0	0	0	0	0	0	0	0	0	0	0	0	0	0	0	0	0	0	0	0	0	0	0	0	0
BEGAIN__chr14	0	0	0	0	0	0	0	0	0	0	0	0	0	0	0	0	0	0	0	0	0	0	0	0	0	0	0	0	0	0	0	0	0	0	0	0	0	0	0	0	0	0	0	0	0	0	0	1	0
BEND2__chrX	1	0	0	0	0	0	0	0	0	0	0	0	0	1	0	0	0	0	0	0	0	0	0	0	0	0	0	0	0	0	0	0	1	0	0	0	0	0	0	0	0	0	0	0	0	0	0	0	1
BEND3P3__chr10	0	0	0	0	0	0	1	0	0	0	0	0	0	0	0	0	0	0	0	1	0	0	0	0	0	0	0	1	0	0	0	0	0	0	0	0	0	0	0	0	0	0	0	0	0	0	0	0	0
BEND3__chr6	1	0	0	0	1	0	0	0	1	1	0	0	0	0	0	0	0	2	0	0	1	1	0	0	0	0	0	0	0	0	0	0	0	0	0	0	0	0	0	0	0	0	0	0	1	1	1	2	1
BEND4__chr4	0	0	0	0	0	1	0	0	0	0	0	0	1	0	0	0	0	0	0	0	1	0	0	0	0	0	0	0	0	0	0	0	1	3	0	0	0	0	0	0	0	0	0	0	0	0	0	0	0
BEND5__chr1	0	0	0	0	0	0	0	0	0	0	0	0	0	0	0	0	0	0	0	0	0	0	0	0	0	0	0	0	0	0	0	0	0	0	0	0	0	0	0	0	0	0	0	0	0	0	0	0	0
BEND6__chr6	2	0	1	0	1	0	0	0	0	0	0	0	0	0	0	2	0	1	0	0	1	1	0	0	1	0	0	0	0	0	0	0	5	1	0	0	0	0	0	0	0	0	0	1	2	0	0	0	0
BEND7__chr10	5	0	2	2	0	0	0	0	6	2	0	0	0	3	0	1	0	1	0	2	1	2	0	0	2	0	0	0	0	1	3	0	0	0	0	0	0	0	0	0	0	0	0	3	0	1	0	0	1
BEST1__chr11	0	0	0	0	0	0	0	0	0	0	0	0	0	0	0	0	0	0	0	0	0	0	0	0	0	0	0	0	0	0	0	0	0	0	0	0	0	0	0	0	0	0	0	0	0	0	0	0	0
BEST3__chr12	0	0	0	0	0	0	0	0	0	0	0	0	0	0	0	0	0	0	0	0	0	0	0	0	0	0	0	0	0	0	0	0	2	0	0	0	0	0	0	0	0	0	0	0	0	0	0	0	0
BEST4__chr1	0	0	0	0	0	0	0	0	0	0	0	0	0	0	0	0	0	0	0	0	0	0	0	0	0	0	0	0	0	0	0	0	0	0	0	0	0	0	0	0	0	0	0	0	0	0	0	0	0
BET1L__chr11	1	0	2	2	3	1	1	0	0	0	2	0	2	0	0	2	0	4	0	3	2	5	0	0	2	0	2	0	2	1	1	0	2	0	0	0	0	0	0	0	0	0	0	0	2	8,01	1	3	9,01
BET1__chr7	2	0	4	1	1	0	2	0	6	1	0	0	2	4	0	3	0	1	0	7,01	3	4	0	0	2	0	2	1	0	2	1	0	3	5	0	0	0	0	0	0	0	0	0	5	4	3	2	4	2
BEX1__chrX	27,09	0	23,06	29,1	21,05	22,06	23,06	0	15,03	25,07	19,04	1	14,02	37,16	0	8,01	0	23,06	0	87,93	12,02	19,04	0	0	32,12	0	15,03	6	15,03	28,09	24,07	0	13,02	26,08	0	0	3	0	0	3	0	0	3	36,15	42,21	17,03	15,03	25,07	32,12
BEX2__chrX	0	0	0	0	0	0	1	0	0	0	0	0	0	0	0	0	0	0	0	1	1	1	0	0	2	0	1	1	0	0	0	0	0	0	0	0	0	0	0	0	0	0	0	1	1	1	0	2	0
BEX4__chrX	1	0	0	0	0	0	0	0	0	0	0	0	0	0	0	0	0	0	0	0	0	0	0	0	0	0	1	0	0	1	0	0	2	0	0	0	0	0	0	0	0	0	0	2	4	0	0	3	0
BFAR__chr16	5	0	1	8,01	3	5	6	0	5	6	0	0	6	4	0	3	0	2	0	16,03	13,02	7,01	0	0	6	0	0	1	1	3	5	1	3	2	0	0	0	0	0	1	1	0	1	2	5	2	1	2	7,01
BFSP1__chr20	0	0	0	0	0	0	0	0	0	0	0	0	0	0	0	0	0	0	0	0	0	1	0	0	0	0	1	0	0	0	0	0	0	0	0	0	0	0	0	0	0	0	0	1	1	0	0	2	0
BGLAP__chr1	0	0	0	0	0	0	1	0	0	0	0	0	0	0	0	0	0	0	0	0	0	0	0	0	0	0	0	0	0	0	0	0	0	0	0	0	0	0	0	0	0	0	0	0	0	0	0	0	0
BGN__chrX	2	0	7,01	0	0	0	4	0	0	9,01	5	0	1	2	0	21,05	0	7,01	0	6	0	1	0	0	15,03	0	1	0	2	1	0	0	0	0	0	0	0	0	0	0	0	0	0	16,03	6	0	1	8,01	29,1
BHLHB9__chrX	1	0	0	1	0	1	0	0	2	0	0	0	0	0	0	1	0	0	0	2	0	0	0	0	0	0	0	0	0	0	0	0	0	0	0	0	0	0	0	0	0	0	0	0	0	0	0	0	0
BHLHE22__chr8	0	0	0	0	0	0	0	0	0	0	0	0	0	0	0	0	0	0	0	0	0	0	0	0	0	0	0	0	0	0	0	0	0	0	0	0	0	0	0	0	0	0	0	0	0	0	0	0	0
BHLHE40__chr3	1	0	1	2	0	0	1	0	0	2	0	0	0	0	0	0	0	0	0	3	0	0	0	0	0	0	0	0	0	0	0	0	2	3	0	0	0	0	0	0	0	0	0	0	0	0	0	1	3
BHLHE41__chr12	2	0	4	0	2	0	2	0	0	0	1	0	4	0	0	1	0	4	0	4	1	12,02	0	0	0	0	6	2	3	18,04	0	0	1	3	0	0	0	0	0	1	0	0	0	12,02	19,04	0	0	2	2
BHMT2__chr5	0	0	0	2	0	0	0	0	0	0	1	0	0	0	0	0	0	0	0	2	1	0	0	0	0	0	0	0	0	0	0	0	0	0	0	0	0	0	0	0	0	0	0	1	2	0	1	0	0
BHMT__chr5	0	0	0	0	0	0	0	0	0	0	0	0	0	0	0	0	0	0	0	0	0	0	0	0	0	0	0	0	0	0	0	0	0	0	0	0	0	0	0	0	0	0	0	0	0	0	0	0	0
BICC1__chr10	1	0	0	0	0	0	0	0	0	0	0	0	0	0	0	0	0	0	0	0	0	0	0	0	0	0	0	0	0	0	0	0	0	0	0	0	0	0	0	0	0	0	0	0	1	0	0	0	0
BICD1__chr12	0	0	2	1	0	0	0	0	0	0	0	0	0	1	0	0	0	1	0	3	1	3	0	0	3	0	1	0	0	0	1	0	0	1	0	0	0	0	0	0	0	0	0	0	0	1	0	0	0
BICD2__chr9	2	0	2	2	3	2	0	0	6	4	3	0	0	2	0	3	0	3	0	3	1	4	0	0	3	0	2	1	1	1	3	0	5	2	0	0	0	0	0	0	0	0	0	1	3	3	2	2	4
BID__chr22	0	0	2	8,01	3	2	1	0	1	1	1	0	2	3	0	2	0	3	0	5	4	3	0	0	4	0	0	0	1	1	2	0	3	4	0	0	0	0	0	0	0	0	0	4	1	1	0	1	4
BIK__chr22	0	0	0	0	0	0	0	0	0	0	0	0	0	0	0	0	0	0	0	0	0	0	0	0	0	0	0	0	0	0	0	0	0	0	0	0	0	0	0	0	0	0	0	0	0	0	0	0	0
BIN1__chr2	5	0	2	10,01	10,01	9,01	3	0	15,03	7,01	6	0	4	6	1	4	0	10,01	0	13,02	10,01	4	0	0	3	0	0	0	3	3	9,01	0	12,02	6	0	0	1	0	0	0	0	0	1	8,01	3	5	0	5	13,02
BIN3__chr8	2	0	0	1	0	1	0	0	0	1	1	0	0	0	0	0	0	2	0	1	0	0	0	0	0	0	0	0	0	0	1	0	1	0	0	0	0	0	0	0	0	0	0	1	1	2	0	1	2
BIRC2__chr11	11,01	0	2	17,03	11,01	3	6	0	17,03	7,01	6	1	2	1	0	3	0	2	0	10,01	4	9,01	0	0	16,03	0	2	3	1	4	0	0	15,03	3	0	1	0	0	0	1	0	0	0	2	2	5	4	1	18,04
BIRC3__chr11	0	0	0	3	0	0	0	0	0	0	0	0	1	0	0	0	0	0	0	0	0	0	0	0	0	0	0	0	0	0	0	0	2	0	0	0	0	0	0	0	0	0	0	12,02	0	0	0	0	1
BIRC5__chr17	10,01	0	0	12,02	10,01	3	0	0	25,07	10,01	7,01	0	4	0	0	15,03	0	2	0	0	11,01	19,04	0	0	13,02	1	0	4	0	0	9,01	0	12,02	2	1	2	0	0	0	0	0	0	0	0	0	7,01	4	0	10,01
BIRC6__chr2	5	0	2	8,01	0	5	1	0	3	3	2	0	1	0	0	5	0	2	0	3	2	1	0	0	2	0	0	1	0	2	3	0	3	3	0	0	0	0	0	0	0	0	0	2	3	2	0	2	5
BIRC7__chr20	0	0	0	0	0	0	0	0	0	0	0	0	0	0	0	0	0	0	0	0	0	0	0	0	0	0	0	0	0	0	0	0	0	0	0	0	0	0	0	0	0	0	0	0	0	0	0	1	0
BIVM-ERCC5__chr13	1	0	0	0	0	0	0	0	0	0	0	0	0	0	0	0	0	0	0	0	0	0	0	0	0	0	0	0	0	0	0	0	0	0	0	0	0	0	0	0	0	0	0	0	0	0	0	0	0
BIVM__chr13	4	0	1	6	0	1	0	0	4	3	2	0	1	1	0	0	0	3	0	4	3	5	0	0	1	0	2	1	1	3	1	0	3	1	0	0	0	0	0	1	0	0	0	1	5	0	0	1	0
BLCAP__chr20	0	0	0	4	3	2	1	0	2	0	0	0	1	0	0	1	0	2	0	5	1	1	0	0	1	0	0	1	1	2	2	0	2	0	0	0	0	0	0	0	0	0	0	1	1	1	2	0	1
BLID__chr11	0	0	0	0	0	0	0	0	0	1	0	0	0	0	0	0	0	0	0	1	1	0	0	0	0	0	0	0	0	0	0	0	0	1	0	0	0	0	0	0	0	0	0	0	0	0	0	0	0
BLMH__chr17	2	0	1	4	4	6	0	0	9,01	3	3	0	2	0	0	5	0	2	0	5	3	2	0	0	5	0	0	1	1	1	5	0	7,01	2	0	0	0	0	0	0	0	0	0	2	3	4	5	2	6
BLM__chr15	0	0	0	0	0	0	0	0	0	0	0	0	1	1	0	0	0	0	0	0	1	0	0	0	0	0	0	0	0	0	1	0	1	0	0	0	0	0	0	0	0	0	0	0	0	1	0	0	2
BLOC1S1-RDH5__chr12	1	0	0	0	0	0	0	0	1	0	1	0	0	0	0	0	0	2	0	2	0	0	0	0	0	0	0	0	0	0	0	0	1	1	0	0	0	0	0	0	0	0	0	0	0	0	0	1	0
BLOC1S1__chr12	5	1	1	4	5	5	1	0	2	1	4	0	1	0	0	6	0	6	0	13,02	4	10,01	0	0	12,02	0	0	4	2	4	4	0	4	2	0	0	1	0	0	0	1	0	1	4	1	3	6	3	12,02
BLOC1S2__chr10	13,02	0	3	8,01	5	9,01	5	0	11,01	6	5	0	11,01	10,01	0	5	0	4	0	6	4	23,06	0	0	22,06	0	2	3	1	9,01	2	0	11,01	3	0	0	0	0	0	0	0	0	0	6	11,01	3	2	2	3
BLOC1S3__chr19	0	0	0	1	0	0	0	0	0	1	0	0	0	0	0	1	0	0	0	0	1	1	0	0	7,01	0	1	0	1	0	0	0	1	0	0	0	0	0	0	1	0	0	0	0	0	0	0	1	0
BLOC1S4__chr4	2	0	0	1	1	2	2	0	4	0	0	0	2	1	0	2	0	1	0	0	1	2	0	0	0	0	0	0	0	2	2	0	1	3	0	0	0	0	0	0	0	0	0	1	2	2	1	0	1
BLOC1S6__chr15	5	0	5	7,01	5	5	4	0	11,01	7,01	6	0	2	6	0	6	0	6	0	8,01	5	10,01	0	0	4	0	2	7,01	1	2	5	0	2	7,01	0	0	0	0	2	0	0	0	0	1	6	4	3	4	11,01
BLVRA__chr7	2	0	4	8,01	2	6	1	0	8,01	4	1	0	1	3	0	2	0	4	0	5	1	10,01	0	0	5	0	0	0	4	4	1	0	6	1	0	0	0	0	0	0	0	0	0	3	2	3	2	3	7,01
BLVRB__chr19	3	0	1	1	0	1	1	0	1	1	1	0	1	2	0	0	0	0	0	0	0	2	0	0	0	0	0	0	0	0	0	0	1	1	0	0	0	0	0	0	0	0	0	2	2	0	1	0	0
BLZF1__chr1	0	0	0	0	1	0	0	0	0	0	0	0	1	0	0	0	0	1	0	1	0	1	0	0	0	0	0	0	0	0	0	0	1	1	0	0	0	0	0	0	0	0	0	0	0	0	0	0	3
BMF__chr15	0	0	2	0	0	0	2	0	2	1	0	0	0	2	0	0	0	3	0	4	1	1	0	0	1	0	0	0	1	4	0	0	0	2	0	0	0	0	0	0	0	0	0	2	3	1	1	2	0
BMI1__chr10	0	0	0	0	0	0	0	0	0	0	0	0	0	0	0	0	0	0	0	0	0	0	0	0	0	0	0	0	0	0	0	0	0	0	0	0	0	0	0	0	0	0	0	0	0	0	0	0	0
BMP1__chr8	6	0	1	4	2	5	5	0	5	5	4	0	0	5	0	2	0	0	0	5	2	1	0	0	5	0	5	0	1	11,01	3	0	8,01	1	0	1	1	0	1	0	0	0	0	20,05	11,01	1	2	7,01	6
BMP2K__chr4	0	0	0	0	1	0	0	0	1	1	0	0	0	0	0	0	0	0	0	0	0	0	0	0	0	0	0	1	0	0	0	0	1	1	0	0	0	0	0	0	0	0	0	0	0	0	0	2	4
BMP2__chr20	0	0	0	0	0	0	0	0	0	0	0	0	0	2	0	0	0	3	0	0	0	0	0	0	0	0	0	0	0	0	0	0	0	0	0	0	0	0	0	0	0	0	0	0	0	0	0	0	0
BMP3__chr4	0	0	0	0	0	0	0	0	0	0	0	0	0	0	0	0	0	0	0	0	0	0	0	0	0	0	0	0	0	0	0	0	0	0	0	0	0	0	0	0	0	0	0	0	0	0	0	0	0
BMP4__chr14	5	0	14,02	2	6	27,09	4	0	10,01	6	2	0	8,01	0	0	4	0	4	0	15,03	1	0	0	0	0	0	4	1	12,02	10,01	20,05	0	1	2	0	0	1	0	0	0	0	0	1	22,06	12,02	5	0	8,01	6
BMP6__chr6	0	0	1	0	0	0	0	0	0	0	0	0	0	0	0	0	0	0	0	0	0	1	0	0	0	0	0	0	0	2	0	0	1	0	0	0	0	0	0	0	0	0	0	0	0	0	0	2	0
BMP7__chr20	0	0	0	0	0	0	0	0	0	0	0	0	0	0	0	0	0	0	0	0	0	0	0	0	0	0	0	0	0	0	0	0	0	0	0	0	0	0	0	0	0	0	0	0	0	0	0	0	0
BMP8B__chr1	0	0	0	0	0	0	0	0	0	0	0	0	0	0	0	0	0	0	0	0	0	0	0	0	0	0	0	0	0	0	0	0	0	0	0	0	0	0	0	0	0	0	0	0	0	0	0	0	0
BMPER__chr7	0	0	0	2	0	1	0	0	0	0	0	0	0	0	0	0	0	0	0	0	0	0	0	0	0	0	0	0	0	0	0	0	0	0	0	0	0	0	0	0	0	0	0	0	1	0	0	0	0
BMPR1A__chr10	1	0	2	2	5	2	0	0	2	1	2	0	0	1	0	1	0	0	0	4	2	6	0	0	1	0	0	0	1	2	4	0	2	3	0	0	0	0	0	0	0	0	0	0	2	0	0	0	0
BMPR1B__chr4	0	0	0	0	0	0	0	0	0	0	0	0	0	0	0	0	0	0	0	0	0	0	0	0	0	0	0	0	0	0	0	0	0	0	0	0	0	0	0	0	0	0	0	0	0	0	0	0	0
BMPR2__chr2	1	0	4	15,03	4	12,02	3	0	2	7,01	5	0	0	3	0	2	0	10,01	0	14,02	3	11,01	0	0	8,01	1	6	3	3	3	3	0	16,03	8,01	0	0	0	0	0	0	0	0	0	4	2	2	3	7,01	7,01
BMS1P4__chr10	0	0	0	0	0	0	0	0	0	0	1	0	0	0	0	0	0	0	0	0	0	0	0	0	0	0	0	0	0	0	0	0	0	0	0	0	0	0	0	0	0	0	0	0	0	0	0	0	0
BMS1__chr10	1	0	2	3	1	1	0	0	1	0	0	0	2	2	0	3	0	2	0	1	1	6	0	1	1	0	1	0	1	0	1	0	1	2	0	0	0	0	0	0	0	0	0	0	1	0	2	1	0
BNC1__chr15	0	0	0	0	0	0	0	0	0	1	0	0	0	0	0	0	0	1	0	0	1	0	0	0	0	0	0	0	0	1	0	0	6	0	0	0	0	0	0	0	0	0	0	0	0	0	1	0	1
BNC2__chr9	2	0	3	3	2	4	3	0	2	0	2	0	2	2	0	1	0	6	0	8,01	5	1	0	0	5	0	0	3	0	5	3	0	1	2	0	0	0	0	1	0	0	0	1	8,01	9,01	0	1	3	8,01
BNIP1__chr5	3	0	0	1	0	1	1	0	0	0	0	0	1	0	0	0	0	0	0	0	0	0	0	0	1	0	0	0	0	0	1	0	0	0	0	0	0	0	0	0	0	0	0	0	0	0	0	0	0
BNIP2__chr15	3	0	2	3	4	1	1	0	1	7,01	2	0	3	4	0	2	0	1	0	6	2	4	0	0	5	0	1	0	0	1	5	0	2	0	0	0	0	0	0	0	0	0	0	1	1	0	5	3	7,01
BNIP3L__chr8	12,02	0	10,01	9,01	11,01	20,05	7,01	0	16,03	11,01	14,02	0	6	4	0	10,01	0	14,02	0	33,13	13,02	22,06	0	0	7,01	0	10,01	1	2	15,03	14,02	0	15,03	5	0	3	0	0	1	0	0	0	0	16,03	11,01	5	6	19,04	19,04
BNIP3__chr10	8,01	0	13,02	18,04	34,14	37,16	3	0	38,17	29,1	3	0	14,02	29,1	0	15,03	0	21,05	0	26,08	16,03	29,1	0	0	35,15	1	10,01	3	9,01	20,05	25,07	0	41,2	15,03	0	2	0	0	0	1	0	1	1	14,02	14,02	16,03	6	31,11	9,01
BNIPL__chr1	0	0	0	0	0	0	0	0	0	0	0	0	0	0	0	0	0	0	0	0	0	0	0	0	0	0	0	0	1	0	0	0	0	0	0	0	0	0	0	0	0	0	0	0	0	0	0	0	0
BOC__chr3	0	0	0	0	0	0	2	0	0	0	0	0	0	0	0	0	0	0	0	0	0	0	0	0	1	0	0	0	0	0	0	0	0	0	0	0	0	0	0	0	0	0	0	0	0	0	0	0	0
BOD1L1__chr4	3	0	5	2	0	2	1	0	6	10,01	1	1	2	2	0	2	0	3	0	5	4	2	0	0	3	0	3	0	0	1	5	0	4	2	0	0	0	1	0	0	0	0	0	1	4	0	1	4	5
BOD1__chr5	2	0	1	1	2	1	0	0	5	3	3	0	1	0	0	0	0	0	0	1	0	2	0	0	3	0	1	0	0	2	1	0	2	0	0	0	0	0	0	0	0	0	0	2	2	1	1	1	1
BOK-AS1__chr2	0	0	0	0	0	0	0	0	0	0	0	0	0	0	0	0	0	0	0	0	0	0	0	0	0	0	0	0	0	0	0	0	0	0	0	0	0	0	0	0	0	0	0	0	0	0	0	0	0
BOK__chr2	1	0	0	5	2	3	2	0	3	1	5	0	0	6	0	3	0	1	0	0	4	4	0	0	1	0	0	1	0	2	5	0	4	1	0	0	0	0	0	0	0	0	0	1	0	3	1	0	0
BOLA1__chr1	2	0	1	0	1	0	0	0	0	2	0	0	0	0	0	0	0	0	0	0	0	0	0	0	1	0	0	0	1	1	0	0	3	0	0	0	0	0	0	0	0	0	0	0	0	0	0	1	2
BOLA3-AS1__chr2	5	0	0	1	0	1	0	0	2	0	0	0	2	0	0	0	0	0	0	0	1	0	0	0	0	0	0	0	0	0	1	0	0	0	0	0	0	0	0	0	0	0	0	0	1	1	0	0	0
BOLA3__chr2	1	0	1	13,02	2	3	0	0	4	5	0	0	4	0	0	4	0	2	0	4	5	4	0	0	9,01	0	0	8,01	1	2	9,01	0	2	5	0	0	0	0	0	0	0	0	0	3	0	3	8,01	1	3
BOP1__chr8	2	0	0	0	1	0	0	0	0	2	1	0	2	0	0	1	0	0	0	1	4	0	0	0	3	0	1	0	1	2	2	0	0	0	0	0	0	0	0	0	0	0	0	0	2	2	2	0	5
BORA__chr13	2	0	0	0	0	0	0	0	2	0	0	0	0	0	0	0	0	0	0	0	0	1	0	0	2	0	0	0	0	0	0	0	0	0	0	0	0	0	0	0	0	0	0	0	0	0	0	0	2
BPGM__chr7	5	0	0	4	3	3	3	0	4	1	1	0	1	0	0	1	0	0	0	5	2	2	0	0	4	0	1	1	1	0	1	0	8,01	0	0	0	0	0	0	0	0	0	0	1	0	2	0	0	3
BPHL__chr6	2	0	3	2	0	2	1	0	3	2	1	0	1	0	0	0	0	0	0	4	1	0	0	0	0	0	0	0	0	1	1	0	0	0	0	0	0	0	0	0	0	0	0	1	1	0	1	3	2
BPNT1__chr1	1	0	0	2	0	0	2	0	2	0	0	0	0	0	0	1	0	0	0	1	1	1	0	0	0	0	1	0	0	0	0	0	3	0	0	0	0	0	0	0	0	0	0	2	1	1	0	0	1
BPTF__chr17	9,01	0	6	5	6	7,01	2	1	3	4	6	0	2	6	0	4	0	6	0	10,01	2	8,01	1	0	11,01	0	1	1	0	5	2	0	6	0	0	0	1	0	0	0	0	0	0	7,01	10,01	0	4	4	1
BRAF__chr7	0	0	0	0	0	0	0	0	0	0	0	0	0	0	0	0	0	0	0	0	0	0	0	0	0	0	0	0	0	0	0	0	0	0	0	0	0	0	0	0	0	0	0	0	0	1	0	0	0
BRAP__chr12	1	0	0	1	0	0	1	0	1	1	1	0	1	1	0	1	0	1	0	0	1	1	0	0	0	0	0	0	0	1	1	0	1	1	0	0	0	0	0	0	0	0	0	1	2	1	1	1	1
BRAT1__chr7	1	0	2	4	1	4	2	0	1	1	2	0	0	0	0	0	0	1	0	0	2	1	0	0	1	0	1	0	0	0	2	0	4	3	0	0	0	0	0	0	0	0	0	0	0	0	0	4	2
BRCA1__chr17	5	0	0	5	0	0	1	0	4	2	0	0	0	0	0	1	0	0	0	0	6	2	0	0	11,01	0	0	0	0	0	5	0	24,07	0	1	0	0	0	0	0	0	0	0	0	0	3	1	1	7,01
BRCA2__chr13	1	0	0	1	0	0	0	0	0	0	0	0	0	0	0	0	0	0	0	0	0	1	0	0	1	0	0	0	0	0	1	0	2	0	0	0	0	0	0	0	0	0	0	0	0	0	0	0	1
BRCC3__chrX	1	0	1	2	0	0	1	0	3	2	1	0	1	4	0	1	0	3	0	2	1	2	0	0	2	0	0	2	0	1	1	0	3	1	0	0	0	0	0	0	0	0	0	0	0	1	0	4	6
BRD1__chr22	3	0	5	0	2	0	1	0	0	2	0	0	0	0	0	0	0	0	0	0	1	2	0	0	2	0	0	1	0	2	2	0	1	0	0	0	0	0	0	0	0	0	0	1	0	0	0	2	1
BRD2__chr6	2	0	3	11,01	3	4	0	0	6	2	2	0	4	5	0	2	0	1	0	6	7,01	9,01	0	1	4	0	4	1	0	6	9,01	0	5	3	0	0	0	1	0	0	0	0	0	4	4	4	4	4	2
BRD3__chr9	1	0	1	0	0	1	0	0	1	0	1	0	0	0	0	0	0	1	0	4	3	4	0	0	2	0	0	0	1	1	0	0	3	1	0	0	0	0	0	0	0	0	0	3	2	0	0	4	2
BRD4__chr19	7,01	0	2	3	4	3	2	0	7,01	6	2	0	1	0	0	3	0	3	0	7,01	7,01	4	0	0	7,01	0	0	0	1	2	1	0	6	1	0	0	0	0	0	0	0	0	0	4	2	3	0	2	2
BRD7P3__chr6	0	0	0	0	0	0	0	0	0	0	0	0	0	0	0	0	1	0	0	0	0	0	0	0	0	0	0	0	0	0	0	0	0	0	0	0	0	0	0	0	0	0	0	0	0	0	0	0	0
BRD7__chr16	5	0	1	9,01	4	3	3	0	4	3	0	0	3	0	0	5	0	4	0	2	5	12,02	0	0	5	0	0	1	0	3	2	0	7,01	2	0	0	0	0	0	0	0	0	0	4	4	5	3	1	5
BRD8__chr5	17,03	0	2	2	2	0	3	0	13,02	1	0	0	2	2	0	3	0	1	0	3	5	18,04	0	0	15,03	0	0	0	0	3	2	0	8,01	4	0	0	0	0	0	0	0	0	0	2	5	3	2	1	11,01
BRD9__chr5	0	0	1	2	0	2	0	0	4	2	0	0	3	4	0	0	0	0	0	5	2	5	0	0	2	0	1	1	0	1	2	0	3	1	0	0	0	0	0	0	0	0	0	1	5	2	0	3	2
BRDT__chr1	0	0	0	0	0	0	0	0	0	0	0	0	0	1	0	0	0	0	0	0	0	0	0	0	0	0	0	0	0	0	0	0	0	0	0	0	0	0	0	0	0	0	0	0	0	0	0	0	0
BRE-AS1__chr2	0	0	0	0	0	0	0	0	0	0	0	0	0	0	0	0	0	0	0	0	0	0	0	0	1	0	0	0	0	0	0	0	0	0	0	0	0	0	0	0	0	0	0	0	0	0	0	0	0
BREA2__chr8	0	0	0	0	0	0	0	0	0	0	0	0	0	0	0	0	0	0	0	0	0	0	0	0	0	0	0	0	0	0	0	0	0	0	0	0	0	0	0	0	0	0	0	0	0	0	0	0	0
BRE__chr2	1	0	3	4	1	1	1	0	1	1	1	0	0	1	0	2	0	0	0	1	2	1	0	0	3	0	2	2	0	1	0	0	2	1	0	0	0	0	0	0	0	0	0	0	1	3	0	4	3
BRF1__chr14	2	0	0	0	0	1	0	0	2	0	0	0	1	0	0	1	0	1	0	2	0	0	0	0	2	0	0	0	0	0	0	0	1	2	0	0	0	0	0	0	0	0	0	0	0	1	0	1	0
BRF2__chr8	1	0	0	0	0	1	0	0	0	0	0	0	0	1	0	0	0	0	0	0	1	0	0	0	0	0	0	0	1	3	0	0	1	0	0	0	0	0	0	0	0	0	0	0	0	1	0	0	1
BRI3BP__chr12	1	0	0	1	0	0	0	0	1	0	0	0	0	0	0	0	0	0	0	0	0	1	0	0	0	0	0	1	0	0	5	0	2	0	0	0	0	0	0	0	0	0	0	0	0	1	0	0	0
BRI3__chr7	19,04	0	15,03	26,08	33,13	20,05	16,03	0	20,05	35,15	15,03	0	13,02	15,03	0	22,06	0	8,01	0	22,06	20,05	39,18	0	0	33,13	0	9,01	8,01	4	14,02	25,07	0	31,11	15,03	0	0	0	0	0	0	0	0	0	22,06	22,06	20,05	14,02	21,05	33,13
BRICD5__chr16	0	0	0	0	0	0	0	0	0	0	0	0	0	0	0	0	0	0	0	0	1	0	0	0	0	0	0	0	0	0	0	0	0	0	0	0	0	0	0	0	0	0	0	0	0	1	0	0	0
BRIP1__chr17	6	0	0	1	1	0	0	0	3	3	1	0	0	0	0	1	0	0	0	1	5	2	0	0	9,01	0	0	0	0	0	3	0	3	0	0	0	0	0	0	0	0	0	0	1	0	0	0	0	7,01
BRIX1__chr5	4	0	0	7,01	2	2	1	0	3	9,01	3	0	0	1	0	2	0	4	0	2	3	7,01	0	0	7,01	0	1	4	0	3	6	0	5	1	0	0	0	0	0	0	0	0	0	0	3	5	2	3	7,01
BRK1__chr3	12,02	0	7,01	25,07	16,03	11,01	6	0	22,06	12,02	8,01	0	7,01	12,02	1	15,03	0	11,01	0	25,07	14,02	22,06	1	0	11,01	0	9,01	9,01	7,01	13,02	15,03	0	20,05	11,01	1	0	1	0	0	0	0	0	1	24,07	16,03	9,01	7,01	6	30,11
BRMS1L__chr14	1	0	1	0	2	1	0	0	0	1	0	0	0	0	0	2	0	2	0	0	3	0	0	0	1	0	0	0	0	0	0	0	0	0	0	0	0	0	0	1	0	0	0	0	1	0	2	0	1
BRMS1__chr11	2	0	1	0	6	0	2	0	4	6	3	0	1	0	0	3	0	0	0	2	2	9,01	0	0	3	0	0	1	0	1	1	0	1	1	0	0	0	0	0	0	0	0	0	0	2	3	1	0	4
BROX__chr1	0	0	0	0	0	0	0	0	2	0	0	0	0	0	0	0	0	0	0	0	0	0	0	0	0	0	0	0	0	0	0	0	0	0	0	0	0	0	0	0	0	0	0	0	0	0	0	0	0
BRPF1__chr3	2	0	0	0	1	2	0	0	1	1	1	0	3	1	0	0	0	0	0	0	2	0	0	0	2	0	0	0	0	1	0	0	5	1	0	0	0	0	0	0	0	0	0	0	1	1	0	2	2
BRPF3__chr6	3	0	1	1	5	1	1	0	1	2	0	0	0	1	0	3	0	1	0	4	4	1	0	0	0	0	0	1	1	3	0	0	5	2	0	0	0	0	0	0	0	0	0	0	8,01	0	1	1	1
BRSK1__chr19	0	0	1	4	0	0	0	0	0	0	0	0	2	1	0	0	0	1	0	0	0	1	0	0	0	0	0	0	0	0	0	0	1	0	0	0	0	0	0	0	0	0	0	0	0	0	0	1	1
BRSK2__chr11	0	0	0	0	0	0	0	0	0	0	0	0	0	0	0	0	0	0	0	0	0	0	0	0	0	0	0	0	0	0	0	0	0	0	0	0	0	0	0	0	0	0	0	0	0	0	0	0	0
BRWD1__chr21	4	0	3	1	2	2	1	0	3	1	2	0	1	3	0	3	0	3	0	3	0	0	0	0	3	0	2	0	4	2	0	0	2	2	0	0	0	0	0	0	1	0	0	2	2	2	0	4	2
BRWD3__chrX	0	0	0	1	0	1	1	0	0	4	0	0	0	1	0	0	0	2	0	0	0	1	0	0	0	0	1	0	0	0	1	0	0	1	0	0	0	0	0	0	0	0	0	0	1	0	0	0	2
BSDC1__chr1	3	0	3	2	1	3	0	0	1	0	1	0	1	2	0	0	0	1	0	0	1	0	0	0	3	0	1	0	0	4	0	0	1	0	0	1	0	0	0	0	0	0	0	1	3	1	1	1	0
BSG__chr19	14,02	0	5	36,15	22,06	21,05	9,01	0	42,21	18,04	10,01	2	14,02	25,07	0	30,11	0	12,02	0	38,17	18,04	30,11	0	1	28,09	0	14,02	4	12,02	18,04	34,14	1	36,15	14,02	0	0	0	0	0	0	0	0	0	35,15	24,07	10,01	6	23,06	32,12
BSN-AS2__chr3	0	0	1	0	0	0	0	0	0	0	0	0	0	0	0	0	0	0	0	0	0	0	0	0	0	0	0	0	0	0	0	0	0	0	0	0	0	0	0	0	0	0	0	0	0	0	1	0	1
BSN__chr3	0	0	0	0	0	0	0	0	0	0	0	0	0	0	0	0	0	0	0	0	0	0	0	0	0	0	0	0	0	0	0	0	0	0	0	0	0	0	0	0	0	0	0	0	0	0	0	0	0
BST1__chr4	0	0	0	0	0	0	0	0	0	0	0	0	0	0	0	0	0	0	0	1	0	0	0	0	0	0	0	0	0	0	0	0	0	0	0	0	0	0	0	0	0	0	0	0	0	0	0	0	0
BST2__chr19	0	0	0	0	0	0	0	0	0	0	0	0	0	0	0	0	0	0	0	0	0	0	0	0	0	0	0	0	0	0	0	0	0	0	0	0	0	0	0	0	0	0	0	0	0	0	0	0	0
BTAF1__chr10	1	0	4	0	2	7,01	0	0	8,01	2	1	0	4	6	0	0	0	3	0	2	3	4	0	0	3	0	2	1	0	1	3	0	4	1	0	0	0	0	0	0	0	0	0	1	1	1	0	4	0
BTBD10__chr11	3	0	1	5	8,01	3	0	0	3	1	4	0	1	6	0	1	0	2	0	2	2	7,01	0	0	5	0	3	0	0	1	1	0	9,01	2	0	0	0	0	0	0	0	0	0	1	3	2	1	3	4
BTBD11__chr12	0	0	0	1	0	0	0	0	0	0	1	0	1	0	0	0	0	0	0	0	0	0	0	0	0	0	0	0	0	0	0	0	1	0	0	0	0	0	0	0	0	0	0	0	1	0	0	0	0
BTBD16__chr10	0	0	0	0	0	0	1	0	0	0	0	0	0	0	0	0	0	0	0	1	0	0	0	0	0	0	0	0	0	0	0	0	0	0	0	0	0	0	0	0	0	0	0	0	0	0	0	0	0
BTBD19__chr1	0	0	0	0	0	0	0	0	0	0	0	0	0	0	0	0	0	0	0	0	0	0	0	0	0	0	0	0	0	0	0	0	0	0	0	0	0	0	0	0	0	0	0	1	0	0	0	0	0
BTBD1__chr15	2	0	0	6	3	6	0	0	2	2	1	0	1	0	0	4	0	1	0	3	1	6	0	0	3	0	0	1	0	1	1	0	10,01	2	0	0	0	0	0	0	0	0	1	1	3	2	2	0	6
BTBD2__chr19	5	0	4	11,01	10,01	7,01	6	0	9,01	8,01	6	0	2	8,01	0	4	0	1	0	11,01	13,02	10,01	0	0	5	0	1	5	2	12,02	6	0	7,01	3	0	0	0	0	0	0	0	0	0	8,01	10,01	5	5	7,01	7,01
BTBD3__chr20	4	0	0	1	2	0	1	0	3	1	0	0	1	0	0	0	0	0	0	1	0	1	0	0	0	0	0	1	0	0	1	0	2	0	0	0	0	0	0	0	0	0	0	0	1	0	2	0	1
BTBD6__chr14	1	0	0	5	3	0	0	1	11,01	2	0	0	2	2	0	2	0	6	0	2	2	2	0	0	4	0	0	1	0	1	8,01	0	3	0	0	0	0	0	0	0	0	0	0	1	2	0	2	1	5
BTBD7__chr14	2	1	4	0	1	0	3	0	0	5	1	0	1	3	0	2	0	4	0	7,01	0	2	0	0	4	0	0	1	0	0	8,01	0	3	2	0	0	0	0	0	0	0	0	0	1	2	1	1	3	3
BTBD8__chr1	0	0	0	0	0	0	0	0	0	0	0	0	0	0	0	0	0	0	0	0	0	0	0	0	0	0	0	0	0	0	0	0	0	0	0	0	0	0	0	0	0	0	0	0	0	0	0	0	0
BTBD9__chr6	0	0	0	1	0	0	0	0	2	0	0	0	0	0	0	1	0	1	0	0	0	1	0	0	0	0	0	0	0	0	0	0	1	0	0	0	0	0	0	0	0	0	0	0	0	0	0	2	1
BTC__chr4	0	0	0	0	0	0	0	0	0	0	0	0	0	0	0	0	0	0	0	0	0	0	0	0	0	0	0	0	0	0	0	0	0	0	0	0	0	0	0	0	0	0	0	0	0	0	0	0	0
BTD__chr3	0	0	0	0	1	0	0	0	2	2	3	0	0	0	0	1	0	0	0	1	0	2	0	0	2	0	0	1	0	1	0	0	2	0	0	0	0	0	0	0	0	0	0	0	1	2	3	2	2
BTF3L4__chr1	11,01	0	4	6	6	8,01	5	0	6	12,02	5	0	6	4	0	5	0	10,01	0	6	4	18,04	0	1	8,01	0	5	5	1	5	8,01	0	10,01	5	0	0	0	0	0	0	0	0	0	2	8,01	7,01	7,01	7,01	9,01
BTF3P11__chr13	0	0	0	0	0	0	0	0	0	0	0	0	0	0	0	0	0	0	0	0	0	0	0	0	0	0	0	0	0	0	0	0	0	0	0	0	0	0	0	0	0	0	0	0	0	0	0	0	0
BTF3__chr5	43,22	0	21,05	51,31	52,33	34,14	15,03	0	62,47	47,27	40,19	0	33,13	31,11	0	45,24	0	41,2	0	47,27	34,14	55,37	0	0	61,45	0	11,01	22,06	6	26,08	45,24	0	80,78	27,09	0	1	0	0	0	1	0	0	0	39,18	31,11	29,1	26,08	35,15	66,53
BTG1__chr12	10,01	0	1	6	9,01	5	0	0	13,02	6	0	0	2	3	0	2	0	3	0	9,01	3	8,01	0	0	15,03	0	3	2	1	3	4	0	10,01	4	0	0	0	0	0	1	1	0	1	11,01	3	5	4	2	15,03
BTG2__chr1	0	0	0	2	1	3	0	0	2	0	0	0	1	0	0	2	0	0	0	0	0	1	0	0	0	0	0	0	2	1	0	0	0	0	0	0	0	0	0	0	0	0	1	1	5	0	0	0	0
BTG3__chr21	9,01	0	0	12,02	2	0	1	0	4	5	0	0	1	2	0	2	0	4	0	3	4	13,02	0	0	12,02	0	0	2	1	0	5	0	8,01	0	0	0	0	0	0	0	0	0	1	1	2	1	0	2	11,01
BTLA__chr3	0	0	0	0	0	0	0	0	0	0	0	0	0	0	0	0	0	0	0	0	0	0	0	0	0	0	0	0	0	0	0	0	0	0	0	0	0	0	0	0	0	0	0	0	1	0	0	0	0
BTN2A1__chr6	2	0	0	4	1	2	0	0	2	1	0	0	1	4	0	4	0	1	0	3	2	3	0	0	2	0	2	0	0	0	0	0	3	1	0	0	0	0	0	0	0	0	0	4	1	0	1	0	3
BTN2A2__chr6	0	0	0	0	0	0	0	0	1	0	0	0	0	0	0	0	0	1	0	0	0	0	0	0	1	0	0	0	0	0	0	0	0	0	0	0	0	0	0	0	0	0	0	0	1	2	1	5	1
BTN2A3P__chr6	0	0	0	0	0	0	0	0	0	0	0	0	0	0	0	0	0	0	0	0	0	0	0	0	0	0	0	0	0	0	0	0	0	0	0	0	0	0	0	0	0	0	0	0	0	0	0	0	0
BTN3A1__chr6	3	0	0	2	0	0	0	0	3	0	0	0	0	2	0	1	0	0	0	1	0	1	0	0	1	0	0	0	1	0	0	0	0	1	0	0	0	0	0	0	0	0	0	2	1	0	2	1	1
BTN3A2__chr6	3	0	1	0	1	1	0	0	0	0	0	0	1	1	0	1	0	1	0	3	1	1	0	0	1	0	2	0	0	5	0	0	0	1	0	0	0	0	0	0	0	0	0	1	1	0	0	0	1
BTN3A3__chr6	1	0	0	1	1	0	0	0	1	0	0	0	1	0	0	0	0	0	0	0	0	1	0	0	0	0	1	0	0	0	0	0	0	0	0	0	0	0	0	0	0	0	0	0	0	0	0	1	1
BTNL3__chr5	0	0	0	0	0	0	0	0	0	0	0	0	0	0	0	0	0	0	0	0	0	0	0	0	0	0	0	0	0	0	0	0	0	0	0	0	0	0	1	0	0	0	0	0	0	0	0	0	0
BTNL8__chr5	0	0	0	0	0	0	0	0	0	0	0	0	0	0	0	0	0	0	0	0	0	0	0	0	0	0	0	0	0	0	0	0	0	0	0	0	0	0	0	0	0	0	0	0	0	0	0	0	0
BTRC__chr10	2	0	1	1	0	4	0	0	2	1	1	0	2	2	0	1	0	2	0	1	1	2	0	0	2	0	0	0	0	2	4	0	0	1	0	0	0	0	0	0	0	0	0	1	0	1	1	0	2
BUB1B__chr15	12,02	0	0	7,01	0	0	0	0	32,12	6	1	0	1	0	0	2	0	0	0	1	0	28,09	0	0	14,02	0	0	1	2	0	3	0	6	1	0	0	0	0	0	0	0	0	0	0	0	9,01	2	0	11,01
BUB1__chr2	12,02	0	0	7,01	3	0	0	0	9,01	7,01	2	0	0	0	0	4	0	0	0	0	1	12,02	0	0	10,01	0	0	3	0	0	2	1	13,02	0	0	0	0	0	0	0	0	0	0	1	0	1	1	1	9,01
BUB3__chr10	79,76	0	7,01	28,09	11,01	12,02	1	0	81,8	26,08	11,01	0	6	8,01	0	24,07	0	13,02	0	15,03	20,05	41,2	0	0	56,38	0	1	9,01	1	5	21,05	0	81,8	10,01	0	1	1	0	0	0	0	0	0	6	5	14,02	10,01	6	58,41
BUD13__chr11	1	0	0	1	1	0	0	0	2	1	0	0	1	0	0	1	0	0	0	0	0	0	0	0	3	0	2	1	0	0	1	0	0	1	0	0	0	0	0	0	0	0	0	0	1	0	2	0	1
BUD31__chr7	0	0	0	4	2	1	0	0	2	0	1	0	1	2	0	1	0	1	0	0	1	1	0	0	2	0	0	1	0	1	0	0	3	0	0	0	0	0	0	0	0	0	0	1	0	2	0	1	2
BVES__chr6	1	0	1	0	0	2	0	0	0	0	0	0	1	0	0	1	0	0	0	0	0	1	0	1	0	0	0	2	1	1	2	0	1	0	0	0	0	0	0	0	0	0	0	0	0	0	0	0	1
BYSL__chr6	0	0	1	3	1	0	1	0	1	0	1	0	0	0	0	1	0	4	0	0	3	0	0	0	1	0	0	0	0	0	0	0	1	1	0	0	0	0	0	0	0	0	0	0	0	0	1	3	1
BZRAP1-AS1__chr17	0	0	0	0	0	0	0	0	0	0	0	0	0	0	0	0	0	1	0	0	0	0	0	0	0	0	0	0	0	1	0	0	0	0	0	0	0	0	0	0	0	0	0	1	1	0	0	0	1
BZRAP1__chr17	1	0	0	0	0	2	1	0	0	2	1	0	0	0	1	0	0	0	0	0	0	0	0	0	1	0	0	0	0	2	0	0	0	0	0	0	0	0	0	0	0	0	0	2	2	0	0	3	0
BZW1__chr2	32,12	0	7,01	64,5	39,18	17,03	3	0	48,28	29,1	15,03	0	26,08	27,09	0	35,15	0	24,07	0	36,15	44,23	50,3	0	0	42,21	0	7,01	21,05	5	9,01	34,14	0	61,45	21,05	0	1	1	1	0	0	1	0	0	9,01	20,05	21,05	10,01	14,02	43,22
BZW2__chr7	4	0	1	2	2	3	1	0	4	11,01	1	0	1	4	0	5	0	0	0	2	3	4	0	0	4	0	1	3	1	0	3	0	5	3	0	0	0	0	0	0	0	0	0	4	1	7,01	2	1	7,01
C10orf107__chr10	0	0	0	0	0	0	0	0	0	0	0	0	0	0	0	0	0	0	0	0	0	0	0	0	0	0	0	0	0	0	0	0	0	0	0	0	0	0	0	0	0	0	0	1	0	0	0	0	0
C10orf10__chr10	0	0	1	0	0	0	0	0	0	0	0	0	1	1	0	0	0	0	0	0	0	0	0	0	0	0	0	0	0	0	0	0	0	0	0	0	0	0	0	0	0	0	0	0	0	0	0	0	0
C10orf111__chr10	0	0	0	0	0	0	0	0	0	0	0	0	1	0	0	0	0	0	0	0	0	0	0	0	0	0	0	0	0	0	0	0	1	0	0	0	0	0	1	0	0	0	0	0	0	1	0	0	0
C10orf114__chr10	0	0	0	0	0	1	0	0	2	0	0	0	0	0	0	0	0	0	0	0	0	0	0	0	0	0	0	0	0	0	0	0	0	0	0	0	0	0	0	0	0	0	0	0	0	0	0	0	0
C10orf118__chr10	0	0	0	1	3	0	0	0	0	0	1	0	0	0	0	0	0	2	0	1	0	0	0	0	2	0	0	0	1	0	0	0	2	0	0	0	0	0	0	0	0	0	0	0	1	1	0	1	2
C10orf12__chr10	2	0	0	0	1	0	0	0	0	0	0	0	0	0	0	0	0	1	0	0	0	2	0	0	3	0	0	0	0	0	1	0	0	0	0	0	0	0	0	0	0	0	0	0	0	1	0	0	0
C10orf137__chr10	6	0	1	3	2	0	1	0	2	4	2	0	1	4	0	1	0	4	0	5	2	1	0	0	0	0	0	1	0	2	4	0	6	0	0	0	0	0	0	0	0	0	0	3	2	0	1	7,01	3
C10orf25__chr10	0	0	0	0	0	0	0	0	0	0	0	0	0	0	0	0	0	0	0	0	0	0	0	0	0	0	0	0	0	0	0	0	0	0	0	0	0	0	0	0	0	0	0	0	0	0	0	0	0
C10orf2__chr10	0	0	0	0	0	1	0	0	0	1	0	0	0	0	0	1	0	0	0	0	0	0	0	0	1	0	0	0	0	0	0	0	1	2	0	0	0	0	0	0	0	0	0	0	0	0	1	2	1
C10orf32__chr10	3	0	3	4	0	4	1	0	7,01	6	0	0	1	2	0	2	0	0	0	5	1	10,01	0	0	0	0	1	1	1	0	0	0	4	0	0	0	0	0	1	1	0	0	1	6	6	0	4	1	5
C10orf35__chr10	0	0	0	1	1	0	0	0	0	0	0	0	0	0	0	0	0	0	0	0	0	0	0	0	0	0	0	0	0	0	0	0	0	0	0	0	0	0	0	0	0	0	0	0	0	0	0	0	0
C10orf54__chr10	0	0	0	0	0	0	0	0	0	0	0	0	0	0	0	0	0	0	0	0	0	0	0	0	0	0	0	0	0	1	0	0	0	0	0	0	0	0	0	0	0	0	0	0	4	0	0	0	0
C10orf55__chr10	0	0	0	0	0	0	0	0	0	0	0	0	0	0	0	0	0	0	0	0	0	1	0	0	0	0	0	0	0	0	0	0	0	1	0	0	0	0	0	0	0	0	0	0	0	0	0	0	0
C10orf62__chr10	0	0	0	0	0	0	0	0	0	0	0	0	0	0	0	0	0	0	0	0	0	0	0	0	0	0	0	0	0	0	0	0	0	0	0	0	0	0	0	0	0	0	0	0	0	0	0	0	0
C10orf68__chr10	0	0	0	0	0	1	0	0	0	0	0	0	0	0	0	0	0	0	0	0	0	0	0	0	0	0	0	0	0	0	0	0	0	0	0	0	0	0	0	0	0	0	0	0	0	0	0	0	0
C10orf76__chr10	1	0	0	0	0	0	0	0	4	0	0	0	0	0	0	1	0	1	0	0	1	4	0	0	1	0	1	0	0	0	0	0	0	0	0	0	0	0	0	0	0	0	0	1	1	1	0	3	2
C10orf88__chr10	0	0	0	2	1	2	0	0	1	2	2	0	0	2	0	1	0	1	0	0	0	5	1	0	4	0	0	0	0	2	1	0	4	1	0	0	0	0	0	0	0	0	0	0	2	0	3	1	0
C10orf90__chr10	0	0	0	0	0	0	0	0	0	0	0	0	0	0	0	0	0	0	0	0	0	0	0	0	0	0	0	0	0	0	0	0	0	0	0	0	0	0	0	0	0	0	0	0	0	0	0	0	0
C10orf95__chr10	0	0	0	0	0	0	0	0	0	0	0	0	0	0	0	0	0	0	0	0	0	0	0	0	0	0	0	0	0	0	0	0	0	0	0	0	0	0	0	0	0	0	0	0	0	0	0	0	0
C11orf1__chr11	3	0	0	1	1	2	1	0	4	1	0	0	1	1	0	0	0	1	0	1	1	3	0	0	1	0	3	0	0	3	0	0	0	3	0	0	0	1	0	0	0	0	0	2	5	0	1	0	4
C11orf24__chr11	0	0	0	9,01	3	5	0	0	1	1	4	0	3	0	0	4	0	4	0	2	5	4	0	0	2	0	0	0	1	0	2	0	2	3	0	0	0	0	0	0	0	0	0	1	0	2	5	0	9,01
C11orf30__chr11	1	0	0	1	0	1	0	0	0	0	0	0	0	0	0	1	0	0	0	1	1	0	0	0	1	0	0	0	0	0	1	0	0	0	0	0	0	0	0	0	0	0	0	0	1	0	1	0	0
C11orf31__chr11	11,01	0	5	11,01	7,01	8,01	2	0	15,03	14,02	16,03	0	7,01	6	0	6	0	6	0	6	10,01	13,02	0	0	13,02	0	1	5	4	1	14,02	0	12,02	4	0	0	0	0	0	0	1	0	0	6	13,02	7,01	3	7,01	6
C11orf35__chr11	0	0	0	0	0	0	0	0	0	0	0	0	0	0	0	0	0	0	0	0	0	0	0	0	0	0	0	0	0	2	0	0	0	0	0	0	0	0	0	0	0	0	0	0	0	0	0	0	0
C11orf44__chr11	0	0	0	0	0	0	0	0	0	0	0	0	0	0	0	0	0	0	0	0	0	0	0	0	0	0	0	0	0	0	0	0	0	0	0	0	0	0	0	0	0	0	0	0	0	0	0	0	0
C11orf45__chr11	0	0	0	0	0	0	0	0	0	0	0	0	0	0	0	0	0	0	0	1	0	0	0	0	0	0	0	0	0	0	0	0	0	0	0	0	0	0	0	0	0	0	0	0	0	0	0	0	0
C11orf48__chr11	3	0	0	6	0	1	0	0	3	3	1	0	4	0	0	3	0	4	0	2	2	0	0	0	4	0	1	2	0	0	1	0	3	0	0	0	0	0	0	0	0	0	0	3	0	7,01	0	1	0
C11orf49__chr11	2	0	1	1	1	3	1	0	2	0	3	0	2	0	0	0	0	1	0	2	1	2	0	0	5	0	0	1	1	2	0	0	1	1	0	0	0	0	0	0	0	0	0	3	5	0	2	4	1
C11orf54__chr11	1	0	1	3	0	0	4	0	4	1	0	0	0	2	0	3	0	2	0	0	1	5	0	0	2	0	0	0	1	1	0	0	1	1	0	0	0	0	0	0	0	0	0	6	0	0	0	2	2
C11orf57__chr11	3	0	1	1	2	5	0	0	2	2	0	0	1	0	0	0	0	1	0	2	2	2	0	0	6	0	0	0	1	2	1	0	1	0	0	0	0	0	0	0	0	0	0	1	3	2	3	1	4
C11orf58__chr11	12,02	0	13,02	9,01	7,01	15,03	2	0	22,06	7,01	10,01	1	10,01	7,01	0	11,01	0	9,01	0	22,06	12,02	24,07	0	0	16,03	0	10,01	5	5	11,01	15,03	0	24,07	7,01	0	0	0	0	0	0	0	0	1	14,02	14,02	9,01	12,02	6	11,01
C11orf63__chr11	1	0	0	0	0	0	0	0	1	0	0	0	0	0	0	0	0	0	0	1	0	2	0	0	0	0	0	0	0	1	1	0	0	0	0	0	0	0	0	0	0	0	0	0	0	0	0	0	0
C11orf65__chr11	0	0	0	0	0	0	0	0	0	1	0	0	0	0	0	0	0	0	0	0	0	0	0	0	0	0	0	0	0	0	0	0	0	0	0	0	0	0	0	0	0	0	0	0	0	0	0	0	0
C11orf68__chr11	4	0	6	16,03	11,01	7,01	2	1	35,15	10,01	6	0	0	2	0	10,01	0	16,03	0	8,01	9,01	6	0	0	15,03	0	5	4	1	0	1	0	10,01	3	0	0	0	0	0	0	0	0	0	2	2	3	5	7,01	15,03
C11orf70__chr11	0	0	1	0	0	0	0	0	1	0	1	0	0	0	0	0	0	0	0	1	0	0	0	0	0	0	0	0	0	1	0	0	0	0	0	0	0	0	0	0	0	0	0	0	0	1	1	0	1
C11orf71__chr11	0	0	1	0	0	0	0	0	0	0	0	0	0	0	0	0	0	0	0	0	0	0	0	0	0	0	0	0	0	0	0	0	0	0	0	0	0	0	0	0	0	0	0	0	0	0	0	0	0
C11orf73__chr11	2	0	1	3	3	0	2	0	2	4	3	0	6	2	0	3	0	4	0	4	3	4	0	0	7,01	0	2	3	0	3	6	0	7,01	0	0	0	0	0	0	0	0	0	1	2	2	2	3	4	3
C11orf74__chr11	0	0	1	0	0	0	0	0	1	0	0	0	0	1	0	0	0	0	0	2	0	1	0	0	0	0	0	0	0	0	0	0	2	0	0	0	0	0	0	0	0	0	0	0	2	0	1	0	0
C11orf75__chr11	0	0	0	0	3	0	0	0	0	1	0	0	0	0	0	0	0	1	0	0	0	0	0	0	0	0	1	0	0	0	2	0	1	0	0	0	0	0	0	0	0	0	0	2	1	0	0	1	1
C11orf80__chr11	1	0	0	0	1	1	0	0	1	3	2	0	0	0	0	0	0	1	0	0	1	0	0	0	4	0	1	0	1	0	2	0	4	0	0	0	0	0	0	0	0	0	0	0	1	0	1	1	0
C11orf82__chr11	1	0	0	1	0	0	0	0	1	0	0	0	1	0	0	0	0	0	0	0	0	3	0	0	1	0	0	0	0	0	1	0	1	0	0	0	0	0	0	0	0	0	0	0	0	0	0	0	0
C11orf83__chr11	1	0	0	0	1	0	0	0	1	2	0	0	1	0	0	1	0	0	0	1	1	1	0	0	2	0	0	0	0	0	1	0	1	0	0	0	0	0	0	0	0	0	0	0	1	2	1	2	1
C11orf84__chr11	6	0	2	2	1	1	2	0	4	3	3	0	4	1	1	2	0	2	0	0	1	3	0	0	2	0	0	0	1	3	5	0	8,01	0	0	0	0	0	0	0	1	0	0	1	1	1	1	2	3
C11orf91__chr11	0	0	0	1	0	0	0	0	0	0	0	0	0	0	0	0	0	0	0	0	0	0	0	0	0	0	0	0	0	0	0	0	0	0	0	0	0	0	0	0	0	0	0	0	0	0	0	0	0
C11orf94__chr11	0	0	0	0	0	0	0	0	0	0	0	0	0	0	0	0	0	0	0	0	0	0	0	0	0	0	0	0	0	0	0	0	0	0	0	0	0	0	0	0	0	0	0	0	0	0	0	0	0
C11orf95__chr11	1	0	0	1	2	3	0	0	5	0	1	0	0	0	0	0	0	1	0	1	1	2	0	0	0	0	0	0	0	6	0	0	2	2	0	0	0	0	0	0	0	0	0	1	1	0	0	1	0
C12orf10__chr12	4	0	3	9,01	1	4	4	0	4	7,01	2	0	3	1	0	3	0	3	0	7,01	1	5	0	0	6	0	1	0	1	2	1	0	4	2	0	0	0	0	0	0	0	0	0	6	2	0	2	1	7,01
C12orf23__chr12	6	0	4	10,01	6	5	4	0	19,04	10,01	4	0	4	9,01	0	9,01	0	4	0	13,02	3	21,05	0	0	9,01	0	3	5	5	2	5	0	5	3	0	0	0	0	0	0	0	0	0	13,02	19,04	6	3	8,01	11,01
C12orf29__chr12	3	0	0	4	2	1	0	0	0	4	2	0	2	0	0	2	0	3	0	1	2	3	0	0	3	0	1	0	0	1	2	0	6	0	0	0	0	0	0	0	1	0	0	0	1	1	1	1	3
C12orf43__chr12	1	0	0	3	0	6	0	0	3	0	1	0	3	1	0	2	0	1	0	0	2	1	0	0	1	0	0	1	0	1	2	0	1	0	0	0	0	0	0	0	0	0	0	0	1	5	1	0	0
C12orf44__chr12	6	0	0	2	3	0	0	0	2	3	0	0	0	1	0	2	0	1	0	4	1	6	0	0	1	0	1	0	0	3	4	0	5	0	0	0	0	0	0	0	0	0	0	1	1	3	0	1	2
C12orf45__chr12	5	0	0	3	1	2	0	0	1	4	1	0	2	0	0	1	0	0	0	1	1	3	0	0	0	0	0	2	0	1	5	0	2	1	0	0	0	0	1	0	0	0	0	1	1	1	0	0	2
C12orf49__chr12	3	0	0	1	0	1	0	0	4	1	0	0	0	1	0	0	0	0	0	5	0	1	0	0	0	0	0	1	0	0	0	0	1	0	0	0	0	0	0	0	0	0	0	1	0	1	0	0	1
C12orf4__chr12	1	0	2	2	1	2	3	0	1	5	0	0	2	0	0	2	0	1	0	4	4	6	0	0	3	0	3	0	0	0	3	0	6	2	0	0	0	0	0	0	0	0	0	3	1	0	0	0	6
C12orf52__chr12	1	0	2	7,01	3	7,01	1	0	14,02	1	3	0	4	2	0	6	0	2	0	10,01	6	2	0	0	12,02	0	4	1	0	3	1	0	3	0	0	0	0	0	0	0	0	0	1	5	6	2	5	5	5
C12orf57__chr12	6	1	6	7,01	3	11,01	0	0	7,01	5	4	0	7,01	6	0	11,01	0	8,01	0	12,02	5	18,04	0	0	11,01	0	9,01	5	3	13,02	4	0	12,02	5	0	0	0	0	0	0	0	0	0	3	9,01	11,01	5	12,02	10,01
C12orf5__chr12	5	0	0	6	1	2	1	0	4	5	2	0	3	3	0	5	0	1	0	1	5	4	0	0	4	0	0	1	1	2	4	0	2	0	0	0	0	0	0	0	0	0	0	0	1	1	2	2	3
C12orf60__chr12	0	0	0	0	0	0	0	0	0	0	0	0	0	0	0	1	0	0	0	0	0	0	0	0	1	0	0	0	0	0	2	0	3	0	0	0	0	0	0	0	0	0	0	0	0	0	0	0	0
C12orf61__chr12	0	0	0	1	0	0	0	0	0	0	0	0	0	1	0	0	0	0	0	0	0	0	0	0	0	0	0	0	0	0	0	0	0	0	0	0	0	0	0	0	0	0	0	0	0	0	0	0	0
C12orf65__chr12	3	0	0	0	3	2	0	0	1	2	0	0	0	1	0	0	0	3	0	2	1	2	0	0	5	0	0	0	1	0	6	0	2	1	0	0	0	0	0	0	0	0	0	1	0	1	1	0	10,01
C12orf66__chr12	0	0	0	0	0	0	0	0	0	0	0	0	1	0	0	0	0	1	0	0	0	0	0	0	0	0	0	0	0	0	0	0	0	0	0	0	0	0	0	0	0	0	0	0	1	0	0	0	0
C12orf68__chr12	3	0	0	0	0	0	0	0	0	0	0	0	0	0	0	0	0	0	0	0	0	0	0	0	0	0	0	0	0	2	2	0	1	0	0	0	0	0	0	0	0	0	0	0	0	0	0	1	1
C12orf70__chr12	0	0	0	0	0	0	0	0	0	0	0	0	0	0	0	0	0	0	0	0	0	0	0	0	0	0	0	0	0	0	0	0	0	0	0	0	0	0	0	0	0	0	0	0	0	0	0	0	0
C12orf73__chr12	1	0	2	0	0	2	0	0	0	4	1	0	4	0	0	0	0	0	0	0	0	2	0	0	2	0	0	2	0	1	0	0	2	0	0	0	0	0	0	0	0	0	0	2	1	0	2	2	1
C12orf75__chr12	66,53	0	8,01	82,82	67,55	18,04	13,02	0	94,06	67,55	45,24	0	16,03	18,04	1	35,15	0	30,11	0	27,09	50,3	49,29	0	0	63,48	1	4	27,09	12,02	19,04	44,23	0	109,44	24,07	0	0	1	0	0	0	0	0	2	13,02	11,01	34,14	17,03	7,01	107,38
C12orf76__chr12	1	0	0	3	0	0	2	0	0	3	0	0	1	1	0	0	0	0	0	3	0	8,01	0	0	2	0	0	0	1	0	0	0	4	1	0	0	0	0	0	0	0	0	0	2	3	1	0	0	0
C12orf77__chr12	0	0	0	0	0	0	0	0	0	0	0	0	0	0	0	0	0	0	0	0	0	0	0	0	0	0	0	0	0	0	0	0	0	0	0	0	0	0	0	0	0	0	0	0	0	0	0	0	0
C13orf45__chr13	0	0	0	0	0	0	0	0	0	0	0	0	0	0	0	0	0	0	0	0	0	0	0	0	0	0	0	0	0	0	0	0	0	0	0	0	0	0	0	0	0	0	0	0	1	0	0	0	0
C14orf101__chr14	0	0	1	0	0	0	1	0	0	0	0	0	1	1	0	1	0	0	0	0	0	4	0	0	1	0	2	0	0	0	0	0	4	0	0	0	0	0	0	0	0	0	0	1	2	0	0	1	1
C14orf105__chr14	0	0	0	1	0	0	0	0	0	0	0	0	0	0	0	0	0	0	0	0	0	0	0	0	0	0	0	0	0	0	0	0	0	0	0	0	0	0	0	0	0	0	0	0	0	0	0	0	0
C14orf119__chr14	3	0	4	6	2	2	1	0	10,01	5	4	0	0	2	0	2	0	9,01	0	5	2	8,01	0	0	2	0	2	2	0	1	7,01	0	0	2	0	0	0	0	0	0	0	0	0	3	1	5	1	0	3
C14orf132__chr14	0	0	0	0	0	0	0	0	0	0	0	0	0	0	0	0	0	0	0	0	0	0	0	0	0	0	0	0	0	0	0	0	0	0	0	0	0	0	0	0	0	0	0	0	0	0	0	0	0
C14orf142__chr14	2	0	0	3	0	0	0	0	0	1	0	0	0	0	0	2	0	3	0	1	6	2	0	0	1	0	0	0	0	0	1	0	0	0	0	0	0	0	0	0	0	0	0	1	1	0	0	1	2
C14orf159__chr14	3	0	3	0	0	0	3	0	2	0	0	0	0	1	0	1	0	4	0	1	0	0	0	0	1	0	0	0	0	3	2	0	2	1	0	0	1	0	0	0	0	0	0	1	1	1	1	2	0
C14orf166__chr14	8,01	0	5	16,03	7,01	2	3	0	8,01	5	4	0	7,01	6	0	10,01	0	3	0	6	13,02	13,02	0	0	7,01	0	5	2	5	3	10,01	0	14,02	3	0	0	0	0	0	0	0	0	1	5	8,01	3	3	4	8,01
C14orf169__chr14	0	0	0	1	0	0	0	0	0	2	2	0	1	1	0	0	0	1	0	0	0	4	0	0	1	0	0	2	0	0	1	0	0	1	0	0	0	0	0	0	0	0	0	0	0	2	1	0	1
C14orf182__chr14	0	0	0	0	0	0	0	0	0	1	0	0	0	0	0	0	0	0	0	0	1	1	0	0	1	0	0	0	0	0	2	0	0	0	0	0	0	0	0	0	0	0	0	0	0	0	0	0	0
C14orf1__chr14	2	0	4	4	1	5	2	0	5	2	0	0	3	2	0	1	0	3	0	4	1	4	0	0	9,01	0	0	0	3	4	1	0	3	0	0	0	0	0	0	0	0	0	0	2	5	0	1	4	2
C14orf23__chr14	0	0	0	0	0	0	0	0	0	0	0	0	0	0	0	0	0	0	0	0	0	0	0	0	0	0	0	0	0	0	0	0	0	0	0	0	0	0	0	0	0	0	0	0	0	0	0	0	0
C14orf28__chr14	0	0	0	0	1	0	0	0	0	0	0	0	0	1	0	0	0	1	0	0	0	0	0	0	0	0	0	0	0	3	0	0	0	0	0	0	0	0	0	0	0	0	0	0	1	0	0	0	0
C14orf2__chr14	5	0	6	8,01	9,01	6	3	1	7,01	6	2	0	8,01	1	0	7,01	0	5	0	13,02	7,01	9,01	0	0	7,01	0	2	3	3	0	9,01	0	7,01	4	0	0	0	0	0	0	0	0	0	7,01	1	7,01	2	5	6
C14orf37__chr14	0	0	0	0	0	0	0	0	0	0	0	0	0	0	0	0	0	0	0	0	0	0	0	0	0	0	0	0	0	0	0	0	0	0	0	0	0	0	0	0	0	0	0	0	0	0	0	1	0
C14orf39__chr14	0	0	0	0	0	0	0	0	0	0	0	0	0	0	0	0	0	0	0	0	0	0	0	0	0	0	0	0	0	0	0	0	0	0	0	0	0	0	0	0	0	0	0	0	0	0	0	0	0
C14orf64__chr14	0	0	0	0	0	0	0	0	0	0	0	0	0	0	0	0	0	0	0	0	0	0	0	0	0	0	0	0	0	0	0	0	0	0	0	0	0	0	0	0	0	0	0	0	0	0	0	0	0
C14orf79__chr14	0	0	0	0	1	0	0	0	0	0	1	0	0	2	0	0	0	1	0	0	0	0	0	0	0	0	0	0	0	0	1	0	0	1	0	0	0	0	0	0	0	0	0	0	2	0	1	1	2
C14orf80__chr14	0	0	0	0	0	0	0	0	5	0	0	0	1	0	0	0	0	0	0	0	1	2	0	0	0	0	0	0	0	0	1	0	0	0	0	0	0	0	0	0	0	0	0	0	0	0	0	0	2
C14orf93__chr14	0	0	0	1	4	1	0	0	2	0	1	0	0	0	0	0	0	1	1	0	1	3	0	0	0	0	0	0	0	0	0	0	2	0	0	0	0	0	0	0	0	0	0	0	0	0	0	0	0
C15orf37__chr15	0	0	0	0	0	0	0	0	1	0	0	0	0	0	0	0	0	0	0	0	0	1	0	0	0	0	1	0	0	0	0	0	0	1	0	0	0	0	0	0	0	0	0	0	1	0	0	0	0
C15orf38__chr15	0	0	0	0	0	0	0	0	1	0	0	0	0	0	0	0	0	0	0	1	0	0	0	0	1	0	0	0	0	0	0	0	2	0	0	0	0	0	0	0	0	0	0	0	0	0	0	0	0
C15orf39__chr15	2	0	0	1	4	1	0	0	1	1	0	0	0	0	0	0	0	1	0	0	0	1	0	0	2	0	0	0	0	0	0	0	2	0	0	0	0	0	0	0	0	0	1	0	0	0	2	0	1
C15orf40__chr15	0	0	0	0	1	1	2	0	1	2	1	0	1	0	0	1	0	1	0	1	2	3	0	0	0	0	1	0	0	0	2	0	1	0	0	1	0	0	0	0	0	0	0	2	1	2	0	1	0
C15orf41__chr15	0	0	1	1	0	1	0	0	0	0	1	0	2	0	0	0	0	0	0	0	0	1	0	0	0	0	0	0	0	2	0	0	1	0	0	0	0	0	0	0	0	0	0	1	0	0	0	0	2
C15orf52__chr15	3	0	1	5	7,01	10,01	3	0	3	4	2	0	3	6	0	2	0	4	0	4	4	5	0	0	5	0	0	1	1	2	0	0	7,01	1	0	0	0	0	0	0	0	0	0	2	2	1	2	0	2
C15orf54__chr15	0	0	0	0	0	0	0	0	0	0	0	0	0	0	0	0	0	0	0	0	0	0	0	0	0	0	0	0	0	0	0	0	0	0	0	0	0	0	0	0	0	0	0	0	0	0	0	0	0
C15orf55__chr15	0	0	0	0	0	0	0	0	0	0	0	0	0	0	0	0	0	0	0	0	0	0	0	0	0	0	0	0	0	0	0	0	0	0	0	0	0	0	0	0	0	0	0	0	0	0	0	0	0
C15orf57__chr15	0	0	0	0	1	2	0	0	4	0	0	0	0	2	0	4	0	0	0	5	1	1	0	0	3	0	0	0	0	1	0	0	0	2	0	0	0	0	0	1	0	0	0	1	0	0	0	0	1
C15orf59__chr15	0	0	0	0	0	0	0	0	0	0	0	0	0	0	0	0	0	0	0	0	0	0	0	0	0	0	0	0	0	0	0	0	0	0	0	0	0	0	0	0	0	0	0	0	0	0	0	0	0
C15orf61__chr15	0	0	0	2	1	0	2	0	0	0	0	0	0	0	0	1	0	1	0	2	0	1	0	0	3	0	0	0	1	3	1	0	2	0	0	0	0	0	0	0	0	0	0	0	1	0	1	2	0
C15orf62__chr15	0	0	0	0	0	0	0	0	0	0	0	0	0	0	0	0	0	0	0	0	0	0	0	0	0	0	0	0	0	0	0	0	0	0	0	0	0	0	0	0	0	0	0	0	0	0	0	0	0
C16orf13__chr16	4	1	0	3	5	5	1	0	8,01	3	7,01	0	4	3	0	8,01	0	2	0	5	7,01	12,02	0	0	11,01	0	2	0	0	4	5	0	4	1	0	0	0	0	0	0	0	0	0	4	7,01	3	4	7,01	5
C16orf3__chr16	0	0	0	0	0	0	0	0	0	0	0	0	0	0	0	0	0	0	0	0	0	0	0	0	0	0	0	0	0	0	0	0	0	0	0	0	0	0	0	0	0	0	0	0	0	0	0	0	0
C16orf45__chr16	4	0	3	1	1	4	1	0	4	2	4	0	0	2	0	0	0	1	0	6	0	13,02	0	0	1	0	1	1	0	4	0	0	2	0	0	0	0	0	0	0	0	0	1	8,01	0	2	1	5	2
C16orf46__chr16	0	0	0	0	0	0	0	0	0	0	0	0	0	0	0	0	0	1	0	0	0	1	0	0	0	0	0	0	0	0	0	0	0	0	0	0	0	0	0	0	0	0	0	0	0	0	0	0	0
C16orf52__chr16	0	0	2	3	2	0	1	0	1	2	0	0	1	3	0	0	0	0	0	1	1	0	0	0	1	0	3	0	0	0	0	0	1	4	0	0	0	0	0	1	0	0	0	0	1	0	2	1	0
C16orf55__chr16	2	0	0	3	0	2	0	0	5	0	0	0	0	2	0	1	0	1	0	2	0	1	0	1	1	0	0	1	0	0	1	0	5	1	0	0	0	1	1	0	0	0	0	0	0	0	2	1	2
C16orf58__chr16	9,01	0	9,01	9,01	5	5	2	0	6	10,01	2	0	3	11,01	0	4	0	3	0	9,01	8,01	1	0	0	6	0	1	0	1	10,01	4	0	4	3	0	0	0	0	0	0	0	0	0	2	3	1	3	6	4
C16orf59__chr16	0	0	0	0	0	0	0	0	0	0	0	0	0	0	0	0	0	0	0	0	0	0	0	0	0	0	0	0	0	0	0	0	0	0	0	0	0	0	0	0	0	0	0	0	0	1	0	0	0
C16orf62__chr16	2	0	0	1	1	3	0	0	1	3	1	0	1	1	1	3	0	2	0	8,01	0	2	0	0	4	0	2	0	0	2	1	0	1	0	0	0	0	0	0	0	0	0	1	3	3	0	2	2	2
C16orf70__chr16	1	0	0	0	0	0	0	0	1	1	1	0	1	0	0	0	0	0	0	1	0	0	0	0	0	0	0	0	0	0	1	0	1	0	0	0	0	0	0	0	0	0	0	0	0	0	0	0	1
C16orf72__chr16	7,01	0	1	7,01	3	3	5	0	10,01	3	1	0	1	5	0	1	0	4	0	10,01	5	10,01	0	0	3	0	1	2	0	3	0	0	8,01	2	0	0	0	0	0	0	0	0	1	1	4	4	1	3	3
C16orf74__chr16	0	0	0	2	3	1	0	0	1	3	0	0	1	0	0	0	0	0	0	0	1	0	0	0	3	0	0	0	0	0	1	0	1	1	0	0	0	0	0	0	0	0	0	0	0	0	2	1	0
C16orf80__chr16	8,01	0	1	12,02	9,01	4	4	0	5	3	0	0	2	1	0	2	0	1	0	6	3	11,01	0	0	2	0	0	2	0	0	6	0	6	0	0	0	0	0	0	0	0	0	1	4	2	10,01	2	0	10,01
C16orf86__chr16	0	0	0	0	0	0	0	0	0	0	0	0	0	0	0	0	0	0	0	0	0	0	0	0	0	0	0	0	0	0	0	0	0	0	0	0	0	0	0	0	0	0	0	0	0	0	0	0	0
C16orf87__chr16	3	0	1	1	0	0	0	0	1	0	1	0	1	0	0	0	0	3	0	1	1	1	0	0	0	0	1	0	0	0	1	0	1	0	0	0	0	0	0	0	0	0	0	1	0	0	0	1	1
C16orf88__chr16	0	0	0	1	1	2	0	0	0	0	1	0	1	0	0	2	0	1	0	0	0	1	0	0	1	0	0	0	0	0	1	0	1	0	0	0	0	0	0	0	0	0	0	0	1	0	0	0	0
C16orf89__chr16	0	0	0	1	0	0	0	0	0	0	0	0	0	0	0	0	0	0	0	0	0	0	0	0	0	0	0	0	0	0	0	0	0	0	0	0	0	0	0	0	0	0	0	0	0	0	0	0	0
C16orf91__chr16	0	0	0	0	0	1	1	0	0	0	1	0	0	0	0	2	0	2	0	1	2	1	0	0	2	0	1	0	1	0	2	0	4	0	0	0	0	0	0	0	0	0	0	1	0	0	1	1	1
C16orf93__chr16	0	0	0	0	0	0	0	0	0	1	0	0	0	0	0	0	0	0	0	0	2	0	0	0	0	0	0	0	0	0	0	0	0	0	0	0	0	0	0	0	0	0	0	0	0	0	0	0	0
C16orf95__chr16	0	0	0	0	0	0	0	0	1	1	0	0	0	0	0	0	0	1	0	1	0	0	0	0	0	0	0	0	0	1	0	0	0	0	0	0	0	0	0	0	0	0	0	0	0	0	0	0	0
C17orf100__chr17	1	0	0	1	0	0	0	0	0	0	0	0	0	1	0	3	0	0	0	0	0	0	0	0	0	0	0	0	0	2	2	0	0	0	0	0	0	0	0	0	0	0	0	0	0	0	2	0	0
C17orf102__chr17	1	0	0	0	0	0	0	0	0	0	0	0	0	0	0	0	0	0	0	0	0	0	0	0	0	0	0	0	0	0	0	0	0	0	0	0	0	0	0	0	0	0	0	0	0	0	0	0	0
C17orf103__chr17	1	0	0	0	0	1	1	0	0	0	0	0	0	1	0	0	0	0	0	0	0	0	0	0	0	0	0	0	1	0	0	0	0	1	0	0	0	0	0	0	0	0	0	3	2	0	0	3	0
C17orf104__chr17	0	0	0	0	0	0	0	0	0	0	0	0	0	0	0	0	0	0	0	0	0	0	0	0	0	0	0	0	0	0	0	0	0	0	0	0	0	0	0	0	0	0	0	0	0	0	0	0	0
C17orf107__chr17	0	0	0	1	0	0	0	0	0	0	0	0	0	0	0	0	0	0	0	0	0	0	0	0	0	0	0	0	0	0	0	0	0	0	0	0	0	0	0	0	0	0	0	0	0	0	0	0	0
C17orf51__chr17	0	0	0	2	1	0	0	0	0	0	0	0	0	0	0	1	0	0	0	0	2	1	0	0	0	0	0	0	0	0	0	0	1	0	0	0	0	0	0	0	0	0	0	0	0	3	0	0	0
C17orf53__chr17	0	0	0	0	0	0	0	0	0	0	0	0	0	0	0	0	0	0	0	0	0	1	0	0	0	0	0	1	0	0	0	0	1	0	0	0	0	0	0	0	0	0	0	0	0	0	0	0	0
C17orf58__chr17	3	0	1	1	0	1	0	0	1	1	0	0	0	2	0	0	0	2	0	1	1	1	0	0	0	0	0	2	0	0	1	0	1	0	0	0	0	0	0	0	0	0	0	0	0	0	0	1	2
C17orf59__chr17	0	0	0	0	1	1	0	0	0	0	0	0	0	0	0	1	0	0	0	1	0	0	0	0	1	0	0	0	0	0	0	0	1	0	0	0	0	0	0	0	0	0	0	0	0	0	0	0	1
C17orf62__chr17	2	0	1	0	2	1	2	0	2	2	0	0	0	4	0	0	0	1	0	1	0	4	0	0	4	0	0	0	1	0	2	0	3	0	0	0	0	0	0	0	0	0	0	5	0	0	0	2	4
C17orf67__chr17	0	0	0	0	0	1	0	0	3	0	0	0	0	0	0	0	0	1	0	0	0	0	0	0	0	0	0	0	0	0	0	0	0	0	0	0	0	0	0	0	0	0	0	0	0	0	0	0	2
C17orf70__chr17	1	0	1	2	0	3	1	0	0	1	0	0	1	1	0	1	0	0	0	3	1	0	0	0	3	0	0	0	0	0	1	0	1	1	0	0	0	0	0	0	0	0	0	1	0	2	0	2	1
C17orf75__chr17	0	0	1	1	1	4	0	0	6	2	1	0	0	2	0	1	0	0	0	3	0	3	0	0	1	0	0	0	0	1	1	0	2	1	0	0	0	0	0	0	0	0	0	0	4	2	2	0	1
C17orf76-AS1__chr17	37,16	1	34,14	46,25	45,24	56,38	18,04	0	70,6	48,28	26,08	0	40,19	31,11	1	47,27	0	33,13	0	57,39	44,23	53,34	0	0	55,37	0	17,03	18,04	14,02	16,03	38,17	1	52,33	27,09	0	2	2	0	1	1	0	1	0	56,38	33,13	45,24	30,11	38,17	52,33
C17orf77__chr17	0	0	0	0	0	0	0	0	0	0	0	0	0	1	0	0	0	0	0	0	0	0	0	0	0	0	0	0	0	0	0	0	0	0	0	0	0	0	0	0	0	0	0	0	0	0	0	1	0
C17orf80__chr17	2	0	0	2	3	2	2	0	2	0	0	0	2	2	0	0	0	0	0	0	0	1	0	0	2	0	0	0	0	0	0	0	0	0	0	0	0	0	0	0	0	0	0	0	2	2	1	10,01	0
C17orf82__chr17	0	0	0	0	0	0	0	0	0	0	0	0	1	0	0	0	0	0	0	0	0	0	0	0	0	0	0	0	0	0	0	0	0	0	0	0	0	0	0	0	0	0	0	0	0	0	0	0	0
C17orf85__chr17	3	0	1	4	1	6	2	0	5	3	2	0	1	2	0	6	0	3	0	4	3	3	0	0	7,01	0	2	0	1	1	2	0	4	2	0	0	0	1	0	0	0	0	0	4	1	3	0	2	2
C17orf89__chr17	2	0	0	5	2	3	1	0	5	2	4	0	5	3	0	3	0	5	0	5	2	2	0	0	6	1	0	3	0	0	2	0	2	0	0	0	0	0	0	0	0	0	0	1	1	1	2	0	6
C17orf96__chr17	0	0	0	1	0	0	0	0	0	0	0	0	0	0	0	0	0	1	0	0	0	0	0	0	0	0	0	0	0	0	1	0	1	0	0	0	0	0	0	0	0	0	0	0	0	0	0	0	0
C17orf97__chr17	4	0	1	0	1	0	1	0	1	0	1	0	0	0	0	0	0	0	0	2	0	1	0	0	0	0	0	0	0	0	0	0	0	1	0	0	0	0	0	0	0	0	0	0	0	1	1	1	1
C17orf98__chr17	0	0	0	0	0	0	0	0	0	0	0	0	0	0	0	0	0	0	0	0	0	0	0	0	0	0	0	0	0	0	0	0	0	0	0	0	0	0	0	0	0	0	0	0	0	0	0	0	0
C18orf21__chr18	0	0	1	0	1	2	1	0	2	0	1	0	0	0	0	0	0	3	0	0	1	1	0	0	1	0	0	1	0	1	0	0	1	0	0	0	0	0	0	0	0	0	0	1	0	0	1	1	1
C18orf25__chr18	2	0	2	4	0	4	1	0	1	0	3	0	0	1	0	0	0	0	0	2	1	2	0	0	5	0	0	1	0	0	0	0	0	2	0	0	0	0	0	0	0	0	0	2	0	1	0	2	2
C18orf32__chr18	0	0	0	0	0	0	0	0	0	1	0	0	0	0	0	0	0	0	0	0	0	0	0	0	0	0	0	0	0	0	0	0	0	0	0	0	0	0	0	0	0	0	0	0	0	0	0	0	0
C18orf54__chr18	7,01	0	0	9,01	1	0	0	0	5	3	0	2	0	0	0	0	0	0	0	1	1	1	0	0	4	0	0	1	0	0	2	0	9,01	0	0	0	1	0	0	0	0	0	0	0	0	0	2	0	4
C18orf56__chr18	0	0	0	0	0	0	1	0	0	0	1	0	0	0	0	1	0	0	0	0	0	1	0	0	0	0	0	0	0	0	0	0	0	0	0	0	0	0	0	0	0	0	0	0	0	0	1	0	0
C18orf61__chr18	1	0	0	0	0	0	0	0	0	1	0	0	0	0	0	0	0	0	0	0	1	0	0	0	0	0	0	0	0	0	0	0	0	0	0	0	0	0	0	0	0	0	0	0	0	0	0	0	0
C18orf63__chr18	0	0	0	0	0	0	0	0	0	0	0	0	0	0	0	0	0	0	0	0	0	0	0	0	0	0	0	0	0	0	0	0	0	0	0	0	0	0	0	0	0	0	0	0	0	0	0	0	0
C18orf8__chr18	0	0	0	2	0	0	0	0	1	1	0	0	1	0	0	2	0	1	0	1	0	1	0	0	0	0	0	0	0	0	0	0	0	0	0	0	0	0	0	0	0	0	0	0	1	0	0	0	0
C19orf10__chr19	8,01	0	2	8,01	8,01	5	3	0	6	8,01	3	0	1	7,01	0	9,01	0	5	0	17,03	2	16,03	0	0	5	0	0	1	0	4	9,01	0	3	3	0	0	0	0	0	0	0	0	1	3	11,01	11,01	3	12,02	10,01
C19orf12__chr19	1	0	0	3	1	4	0	0	2	0	2	0	0	1	0	1	0	2	0	3	4	0	0	0	0	0	0	0	0	1	0	0	1	0	0	0	0	0	0	0	0	0	0	0	2	0	0	1	1
C19orf18__chr19	0	0	0	0	0	0	0	0	0	0	0	0	0	0	0	0	0	0	0	0	0	0	0	0	0	0	0	0	0	0	0	0	0	0	0	0	0	0	0	0	0	0	0	0	1	0	0	1	0
C19orf24__chr19	2	0	1	5	0	4	0	0	4	2	1	0	0	2	0	1	0	2	0	1	2	2	0	0	6	0	1	0	1	0	1	0	1	1	0	0	0	0	0	0	0	0	0	1	0	0	1	2	1
C19orf25__chr19	5	0	0	0	2	2	0	0	5	5	0	0	0	0	0	2	0	1	0	1	2	2	0	0	5	0	0	0	0	0	1	0	0	0	0	0	0	0	0	0	0	0	0	0	1	6	0	1	1
C19orf38__chr19	0	0	0	0	0	0	0	0	0	0	0	0	0	0	0	0	0	0	0	0	0	0	0	0	0	0	0	0	0	0	0	0	0	0	0	0	0	0	0	0	0	0	0	0	0	0	0	0	0
C19orf40__chr19	0	0	0	0	0	0	1	0	0	1	0	0	0	0	0	0	0	0	0	0	0	0	0	0	1	0	0	0	0	0	0	0	0	0	0	0	0	0	0	0	0	0	0	0	0	0	0	2	0
C19orf43__chr19	14,02	0	5	9,01	8,01	9,01	8,01	0	20,05	6	5	0	7,01	4	0	10,01	0	5	0	13,02	9,01	12,02	0	0	24,07	1	5	5	2	7,01	7,01	0	23,06	6	0	0	0	0	0	1	0	0	2	6	10,01	5	5	5	15,03
C19orf44__chr19	0	0	0	0	0	0	0	0	0	1	0	0	0	0	0	0	0	0	0	0	0	0	0	0	0	0	0	0	0	0	0	0	1	1	0	0	0	0	0	0	0	0	0	0	0	0	0	0	0
C19orf47__chr19	3	0	0	0	1	0	0	0	2	1	0	0	0	0	0	1	0	1	0	0	0	0	0	0	0	0	0	0	0	0	2	0	0	0	0	0	0	0	0	0	0	0	0	1	0	0	0	0	1
C19orf48__chr19	0	0	0	6	2	1	1	0	2	5	1	0	3	0	0	2	0	4	0	4	9,01	2	0	0	7,01	0	0	0	0	2	4	0	4	1	0	0	0	0	0	0	0	0	0	0	0	1	1	3	4
C19orf52__chr19	0	0	0	0	0	1	0	0	1	2	0	0	1	0	0	3	0	0	0	0	0	2	0	0	0	0	2	2	0	0	2	0	2	1	0	0	0	0	0	0	0	0	0	1	0	0	0	1	1
C19orf53__chr19	7,01	0	2	8,01	9,01	4	2	0	7,01	9,01	5	0	1	5	0	8,01	0	3	0	7,01	3	4	0	0	6	0	1	1	3	3	8,01	0	9,01	0	0	0	0	0	0	0	0	0	0	7,01	6	2	2	4	5
C19orf54__chr19	4	0	0	2	1	0	1	0	0	0	0	0	0	1	0	1	0	2	0	2	1	1	0	0	2	0	0	0	0	0	0	0	0	0	0	0	0	0	0	0	0	0	0	1	3	1	0	1	2
C19orf55__chr19	0	0	0	0	0	0	0	0	0	0	0	0	0	0	0	0	0	0	0	0	0	0	0	0	0	0	0	0	0	0	0	0	0	0	0	0	0	0	0	0	0	0	0	0	0	0	0	0	1
C19orf57__chr19	0	0	0	0	0	0	0	0	0	1	0	0	0	0	0	0	0	0	0	0	1	1	0	0	0	0	0	0	0	0	1	0	0	0	0	0	0	0	0	0	0	0	0	0	0	0	0	0	1
C19orf60__chr19	0	0	0	2	1	3	0	0	4	5	2	0	0	0	0	1	0	2	0	4	0	1	0	0	2	0	0	0	0	2	3	0	6	0	0	0	0	0	0	0	0	0	0	0	0	1	0	0	0
C19orf66__chr19	6	0	3	1	1	5	0	0	3	1	0	0	3	0	0	2	0	1	0	3	0	0	0	0	6	0	2	1	4	3	4	0	5	1	0	0	0	0	0	1	0	0	0	6	4	2	2	3	3
C19orf69__chr19	0	0	0	0	0	0	0	0	0	0	0	0	0	0	0	0	0	0	0	0	0	0	0	0	0	0	0	0	0	0	0	0	0	0	0	0	0	0	0	0	0	0	0	0	0	0	0	0	0
C19orf6__chr19	4	0	3	2	3	4	2	0	6	3	1	0	2	4	0	1	0	2	0	2	1	3	0	0	5	0	0	0	2	2	1	0	3	1	0	0	0	0	0	0	0	0	0	3	5	1	0	1	4
C19orf70__chr19	1	0	1	1	2	3	0	0	3	4	1	0	0	0	0	2	0	1	0	4	3	2	0	0	4	0	3	1	0	0	5	0	4	1	0	0	0	0	0	0	0	0	0	1	2	1	1	0	8,01
C19orf73__chr19	0	0	0	0	0	0	0	0	0	0	1	0	0	0	0	0	0	0	0	0	0	0	0	0	0	0	0	0	0	0	0	0	0	0	0	0	0	0	0	0	0	0	0	0	0	0	0	0	0
C19orf80__chr19	0	0	0	0	0	0	0	0	0	0	0	0	0	0	0	0	0	0	0	0	0	0	0	0	0	0	0	0	0	0	0	0	0	0	0	0	0	0	0	0	0	0	0	0	0	0	0	0	0
C1D__chr2	4	0	1	2	1	2	0	0	6	4	1	0	1	1	0	2	0	3	0	7,01	10,01	3	0	0	1	0	0	2	0	3	0	0	4	0	0	1	0	0	0	0	0	0	0	2	2	2	1	1	0
C1GALT1C1__chrX	6	0	1	9,01	1	1	2	0	3	1	1	0	1	4	0	3	0	2	0	1	1	2	0	0	2	0	0	2	2	2	2	0	1	3	0	0	0	0	0	0	0	0	0	3	1	2	1	0	4
C1GALT1__chr7	5	0	3	5	5	2	2	0	5	5	2	0	3	6	0	1	0	6	0	8,01	4	2	0	0	7,01	0	1	2	1	1	5	0	13,02	6	0	0	0	0	0	0	0	0	0	5	4	2	5	2	7,01
C1QBP__chr17	7,01	0	2	8,01	6	6	1	0	11,01	5	3	0	2	3	0	10,01	0	6	0	4	7,01	4	0	0	12,02	0	1	1	0	1	5	0	14,02	3	0	0	0	0	0	0	0	0	0	1	4	5	5	1	8,01
C1QL1__chr17	6	0	2	12,02	2	13,02	7,01	0	9,01	6	5	0	12,02	4	0	5	0	2	0	0	8,01	6	0	0	6	0	0	3	2	5	11,01	0	12,02	4	0	0	0	0	0	1	0	0	0	4	3	4	1	4	15,03
C1QL4__chr12	0	0	0	0	0	0	0	0	0	0	0	0	0	0	0	0	0	0	0	0	0	0	0	0	0	0	0	0	0	0	0	0	0	0	0	0	0	0	0	0	0	0	0	0	0	0	0	0	0
C1QTNF1__chr17	0	0	0	0	0	0	2	0	0	0	0	0	0	0	0	0	0	0	0	3	0	0	0	0	0	0	1	0	0	2	0	0	0	0	0	0	0	0	0	0	0	0	0	3	0	0	0	0	0
C1QTNF2__chr5	1	0	0	0	0	0	0	0	2	0	0	0	0	0	0	1	0	0	0	0	1	0	0	0	0	0	0	0	0	0	0	0	0	1	0	0	0	0	0	0	0	0	0	0	0	1	0	0	1
C1QTNF3__chr5	0	0	0	0	0	0	0	0	0	0	0	0	0	0	0	0	0	0	0	0	0	0	0	0	0	0	0	0	0	0	0	0	0	0	0	0	0	0	0	0	0	0	0	0	0	0	0	0	0
C1QTNF4__chr11	0	0	0	0	0	0	0	0	0	0	0	0	0	0	0	0	0	0	0	0	0	0	0	0	0	0	0	0	0	0	0	0	0	0	0	0	0	0	0	0	0	0	0	0	1	0	0	0	0
C1QTNF6__chr22	2	0	1	2	0	0	0	0	1	1	0	0	1	2	0	0	0	0	0	0	0	0	0	0	1	0	0	0	1	0	0	0	0	0	0	0	0	0	0	0	0	0	0	2	0	1	0	2	1
C1QTNF9B-AS1__chr13	0	0	0	0	0	0	0	0	0	0	0	0	0	0	0	0	0	0	0	0	0	0	0	0	0	0	0	0	0	0	0	0	0	0	0	0	0	0	0	0	0	0	0	0	0	0	0	0	0
C1QTNF9__chr13	0	0	0	0	0	0	0	0	0	0	0	0	0	0	0	0	0	0	0	0	0	0	0	0	0	0	0	0	0	0	0	0	0	0	0	0	0	0	0	0	0	0	0	0	0	0	0	0	0
C1RL-AS1__chr12	0	0	0	0	0	0	0	0	2	0	0	0	0	0	0	0	0	0	0	1	2	1	0	0	0	0	0	0	0	0	0	0	0	0	0	0	0	0	0	0	0	0	0	0	0	0	0	0	0
C1RL__chr12	0	0	3	1	0	1	1	0	1	0	1	0	2	1	0	4	0	1	0	3	0	1	0	0	4	0	1	0	1	4	0	0	0	0	0	0	0	0	0	0	0	0	0	3	6	1	0	8,01	0
C1R__chr12	1	0	1	0	1	1	2	1	3	0	0	0	0	3	0	1	0	1	0	2	0	0	0	0	0	0	0	0	1	5	0	0	0	0	0	0	0	0	0	0	0	0	0	6	3	1	1	3	0
C1S__chr12	0	0	0	0	1	0	1	0	0	0	2	0	0	2	0	0	0	0	0	1	0	1	0	0	0	0	0	0	0	1	0	0	0	0	0	0	0	0	0	0	0	0	0	5	2	0	0	2	2
C1orf101__chr1	0	0	0	0	0	0	0	0	0	0	0	0	0	0	0	0	0	0	0	0	0	0	0	0	0	0	0	0	0	0	0	0	0	0	0	0	0	0	0	0	0	0	0	0	0	0	0	0	0
C1orf106__chr1	0	0	0	0	0	0	0	0	0	1	0	0	0	0	0	0	0	0	0	0	0	0	0	0	0	0	0	1	0	0	0	0	0	0	0	0	0	0	0	0	0	0	0	0	0	0	0	0	0
C1orf109__chr1	2	0	0	0	0	0	0	0	4	0	0	0	1	0	0	0	0	0	0	1	0	3	0	0	0	0	0	0	0	2	3	0	5	0	0	0	0	0	0	0	0	0	0	3	0	2	1	1	2
C1orf110__chr1	2	0	0	0	1	0	0	0	5	1	0	0	0	0	0	0	0	0	0	0	0	0	0	0	2	0	0	0	0	0	0	0	0	0	0	0	0	0	0	0	0	0	0	0	0	0	0	0	1
C1orf112__chr1	1	0	0	1	0	0	0	0	3	2	0	0	1	0	0	1	0	0	0	0	0	1	0	0	1	0	0	0	0	0	1	0	0	0	0	0	0	0	0	0	0	0	0	0	0	0	1	0	2
C1orf122__chr1	5	0	4	7,01	5	5	0	0	10,01	10,01	10,01	0	9,01	8,01	0	8,01	0	2	0	14,02	6	8,01	0	0	8,01	0	3	3	1	5	12,02	0	7,01	1	0	0	0	0	0	0	0	0	1	5	9,01	9,01	3	9,01	14,02
C1orf123__chr1	4	0	0	2	1	0	1	0	5	6	0	0	2	2	0	1	0	2	0	3	4	3	0	0	4	0	1	1	0	1	3	0	8,01	1	0	0	0	0	0	0	0	0	0	2	3	2	1	3	6
C1orf131__chr1	4	0	0	2	0	0	0	0	0	0	3	0	1	0	0	0	0	0	0	3	1	2	0	0	0	0	0	1	0	0	1	0	1	0	0	0	0	0	0	0	0	0	0	0	1	1	0	0	0
C1orf140__chr1	0	0	0	0	0	0	0	0	0	0	0	0	0	0	0	0	0	0	0	0	0	0	0	0	0	0	0	0	0	0	0	0	0	0	0	0	0	0	0	0	0	0	0	0	0	0	0	0	1
C1orf145__chr1	0	0	0	0	0	1	0	0	0	0	0	0	0	0	0	0	0	0	0	0	0	0	0	0	0	0	0	0	0	0	0	0	0	0	0	0	0	0	0	0	0	0	0	0	0	0	0	0	0
C1orf159__chr1	1	0	0	0	0	0	0	0	1	0	0	0	0	0	0	0	0	0	0	0	0	2	0	0	0	0	0	0	0	0	0	0	0	0	0	0	0	0	0	0	0	0	0	0	1	0	0	0	0
C1orf162__chr1	0	0	0	0	0	0	0	0	0	0	0	0	0	0	0	0	0	0	0	2	0	0	0	0	0	0	0	0	0	0	1	0	0	0	0	0	0	0	0	0	0	0	0	0	0	0	0	0	0
C1orf168__chr1	0	0	0	0	0	0	0	0	0	0	0	0	0	0	0	0	0	0	0	0	0	0	0	0	0	0	0	0	0	0	0	0	0	0	0	0	0	0	0	0	0	0	0	0	0	0	0	0	0
C1orf173__chr1	0	0	0	0	0	0	0	0	0	0	0	0	0	0	0	0	0	0	0	0	0	0	0	0	0	0	0	0	0	0	0	0	0	0	0	0	0	0	0	0	0	0	0	0	0	0	0	0	0
C1orf174__chr1	3	0	1	1	2	0	0	0	2	2	0	0	0	1	0	2	0	1	0	4	1	3	0	0	4	0	1	2	0	0	3	0	6	0	0	0	0	0	0	0	0	0	0	1	1	5	2	0	2
C1orf186__chr1	0	0	0	0	1	0	0	0	1	0	0	0	0	0	0	0	0	0	0	0	0	1	0	0	0	0	0	0	0	0	0	0	0	1	0	0	0	0	0	0	0	0	0	0	2	0	2	0	0
C1orf192__chr1	0	0	0	0	0	0	0	0	0	0	0	0	0	0	0	0	0	0	0	0	0	0	0	0	0	0	0	0	0	0	0	0	0	0	0	0	0	0	0	0	0	0	0	0	0	0	0	0	0
C1orf198__chr1	1	0	1	1	2	2	0	0	3	1	2	0	2	3	0	1	0	0	0	4	1	3	0	0	0	0	0	1	1	1	1	0	5	0	0	0	0	0	0	0	0	0	0	0	3	0	1	0	0
C1orf204__chr1	0	0	0	0	0	0	0	0	0	0	0	0	0	0	0	0	0	0	0	0	0	0	0	0	0	0	0	0	0	2	0	0	0	0	0	0	0	0	0	0	0	0	0	0	0	0	0	0	0
C1orf213__chr1	0	0	0	0	0	0	0	0	0	0	0	0	0	0	0	0	0	0	0	1	0	0	0	0	1	0	0	0	0	0	0	0	0	0	0	0	0	0	0	0	0	0	0	1	0	0	0	0	0
C1orf216__chr1	0	0	0	1	0	0	0	0	0	3	0	0	0	0	0	0	0	0	0	2	0	0	0	0	1	0	0	0	0	0	0	0	1	0	0	0	0	0	0	0	0	0	0	0	1	1	0	0	0
C1orf21__chr1	6	0	3	2	0	3	0	0	9,01	5	0	0	0	2	0	1	0	0	0	4	5	3	0	0	11,01	0	0	2	0	0	8,01	0	6	0	0	0	0	0	0	0	0	0	0	3	3	2	0	1	5
C1orf220__chr1	0	0	0	0	0	1	0	0	0	1	0	0	0	0	0	0	0	0	0	1	1	0	0	0	0	0	0	0	0	0	0	0	0	0	0	0	0	0	1	0	0	0	0	0	0	1	0	0	0
C1orf226__chr1	0	0	0	2	0	0	0	0	1	1	0	0	1	0	0	0	0	0	0	0	0	0	0	0	2	0	0	0	0	0	2	0	1	0	0	0	0	0	0	0	0	0	0	0	0	0	0	0	2
C1orf228__chr1	0	0	0	0	0	0	0	0	0	0	0	0	0	0	0	0	0	0	0	1	0	0	0	0	0	0	0	0	0	0	0	0	0	0	0	0	0	0	0	0	0	0	0	0	0	0	0	0	0
C1orf229__chr1	0	0	0	0	0	0	0	0	0	0	0	0	0	0	0	0	0	0	0	0	0	0	0	0	0	0	0	0	0	0	0	0	0	0	0	0	0	0	0	0	0	0	0	0	0	0	0	0	0
C1orf233__chr1	0	0	0	0	0	0	0	0	0	0	0	0	0	0	0	0	0	0	0	0	0	0	0	0	0	0	0	1	0	0	0	0	0	0	0	0	0	0	0	0	0	0	0	0	0	0	0	0	0
C1orf27__chr1	0	0	3	2	1	2	0	0	4	1	0	0	1	0	0	0	0	0	0	1	1	1	0	0	5	0	1	1	0	3	2	0	6	0	0	0	0	0	0	0	0	0	0	3	0	0	0	6	3
C1orf35__chr1	1	0	0	1	0	1	0	0	3	1	1	0	1	0	0	0	0	1	0	3	0	0	0	0	0	0	0	0	0	0	2	0	0	0	0	0	0	0	0	0	0	0	0	0	0	1	0	0	0
C1orf43__chr1	26,08	0	10,01	18,04	10,01	15,03	10,01	0	29,1	11,01	8,01	0	12,02	8,01	1	24,07	0	12,02	0	18,04	12,02	36,15	0	0	21,05	0	4	5	3	14,02	14,02	0	19,04	11,01	0	0	0	0	0	0	0	0	3	12,02	16,03	11,01	20,05	14,02	16,03
C1orf50__chr1	0	0	1	2	0	1	0	0	0	0	0	0	0	0	0	2	0	0	0	1	1	0	0	0	2	0	0	0	0	0	0	0	1	1	0	0	0	0	0	0	0	0	0	2	0	1	0	0	1
C1orf51__chr1	0	0	0	0	0	0	0	0	0	0	0	0	0	1	0	0	0	0	0	2	0	0	0	0	0	0	0	0	0	0	0	0	0	0	0	0	0	0	0	0	0	0	0	0	0	0	1	0	0
C1orf52__chr1	2	0	2	4	2	0	1	0	4	1	2	0	2	0	0	2	0	1	0	1	2	4	0	0	0	0	0	1	4	5	2	0	0	4	0	0	0	0	0	0	0	0	0	3	1	0	1	0	0
C1orf53__chr1	0	0	1	2	2	0	1	0	0	0	1	0	0	0	0	1	0	1	0	0	1	2	0	0	0	0	0	0	0	0	3	0	0	0	0	0	0	0	0	0	0	0	0	0	0	0	0	1	1
C1orf54__chr1	0	0	2	0	0	0	0	0	0	0	0	0	0	0	0	0	0	1	0	0	0	0	0	0	0	0	0	0	0	0	0	0	0	1	0	0	0	0	0	0	0	0	0	1	0	0	0	0	0
C1orf56__chr1	1	0	0	0	0	2	0	0	0	0	0	0	0	0	0	0	0	1	0	0	0	0	0	0	0	0	0	0	0	0	0	0	0	0	0	0	0	0	0	0	0	0	0	0	0	0	0	2	0
C1orf61__chr1	0	0	0	0	0	0	0	0	1	0	0	0	0	0	0	0	0	0	0	0	0	0	1	0	0	0	0	0	0	0	0	0	1	0	0	0	0	0	0	0	0	0	0	0	0	0	0	0	0
C1orf63__chr1	1	0	1	1	1	4	2	0	0	0	1	0	2	1	0	1	0	0	0	9,01	0	4	0	0	3	0	1	3	2	4	0	0	2	1	0	0	0	0	0	1	0	0	1	5	3	0	0	7,01	2
C1orf74__chr1	0	0	0	0	0	0	0	0	0	0	0	0	0	0	0	0	0	0	0	0	0	0	0	0	0	0	0	0	0	0	0	0	0	0	0	0	0	0	0	0	0	0	0	0	0	0	0	0	0
C1orf85__chr1	0	0	0	1	1	0	1	0	0	1	1	0	0	0	0	1	0	1	0	0	1	1	0	0	1	0	0	0	0	0	0	0	0	0	0	0	0	0	0	0	0	0	0	0	1	0	0	0	0
C1orf86__chr1	2	0	1	1	4	1	0	0	5	2	2	0	2	6	0	1	0	0	0	3	1	4	0	0	4	0	0	0	2	6	2	0	6	1	0	0	0	0	0	0	0	0	0	2	1	1	0	0	4
C20orf111__chr20	1	0	1	2	1	1	0	0	3	1	2	0	0	0	0	1	0	1	0	3	0	4	0	0	3	0	0	0	0	0	0	0	3	0	0	0	0	0	0	0	0	0	1	3	1	1	2	3	5
C20orf112__chr20	1	0	2	0	0	2	3	0	2	3	1	0	1	1	0	0	0	0	0	3	0	0	0	0	1	0	0	0	0	1	1	0	0	0	0	1	0	0	0	0	0	0	0	0	2	0	0	5	1
C20orf118__chr20	0	0	0	0	0	0	0	0	0	0	0	0	0	0	0	0	0	0	0	0	0	0	0	0	0	0	0	0	0	0	0	0	0	0	0	0	0	0	0	0	0	0	0	0	0	0	0	0	1
C20orf141__chr20	0	0	0	0	0	0	0	0	0	0	0	0	0	0	0	0	0	0	0	0	0	0	0	0	0	0	0	0	0	0	0	0	0	0	0	0	0	0	0	0	0	0	0	0	0	0	0	0	0
C20orf166-AS1__chr20	0	0	0	0	0	0	0	0	0	0	0	0	0	0	0	0	0	0	0	0	0	0	0	0	0	0	0	0	0	0	0	0	0	0	0	0	0	0	0	0	0	0	0	0	0	0	0	0	0
C20orf194__chr20	1	0	0	2	1	0	0	0	0	0	0	0	1	0	0	1	0	1	0	1	0	0	0	0	0	0	0	0	0	0	0	0	1	0	0	0	0	0	0	0	0	0	0	0	0	0	0	0	3
C20orf196__chr20	0	0	0	0	0	0	0	0	0	0	0	0	0	0	0	0	0	0	0	0	0	0	0	0	0	0	0	0	0	0	0	0	0	0	0	0	0	0	0	0	0	0	0	0	0	0	0	0	0
C20orf201__chr20	0	0	0	0	0	0	0	0	0	0	0	0	0	0	0	0	0	0	0	0	0	0	0	0	0	0	0	0	0	0	0	0	0	0	0	0	0	0	0	0	0	0	0	0	0	0	0	0	0
C20orf203__chr20	0	0	0	0	0	0	0	0	0	0	0	0	0	0	0	0	0	0	0	0	0	0	0	0	0	0	0	0	0	0	0	0	0	0	0	0	0	0	0	0	0	0	0	0	0	0	0	0	0
C20orf27__chr20	7,01	0	0	8,01	8,01	5	0	0	10,01	4	4	0	3	2	0	9,01	0	4	0	2	8,01	6	0	0	6	0	0	3	0	0	7,01	0	10,01	1	0	0	0	0	0	0	0	0	0	0	1	2	6	0	7,01
C20orf96__chr20	0	0	0	0	0	1	0	0	0	1	1	0	0	1	0	0	0	0	0	2	0	0	0	0	1	0	1	0	0	1	0	0	0	1	0	0	0	0	0	0	0	0	0	1	1	0	1	0	0
C21orf119__chr21	0	0	0	0	1	0	0	0	0	0	0	0	0	0	0	0	0	0	0	1	0	0	0	0	0	0	0	0	0	0	0	0	0	0	0	0	0	0	0	0	0	0	0	0	0	0	0	0	0
C21orf2__chr21	1	0	0	1	1	0	1	0	1	0	0	0	0	0	0	1	0	1	0	1	0	0	0	0	0	0	1	0	0	0	0	0	0	0	0	0	0	0	0	0	0	0	0	0	0	0	0	0	0
C21orf33__chr21	0	0	4	0	2	1	1	0	1	2	2	0	2	0	0	3	0	0	0	0	3	4	0	0	0	0	1	0	1	0	0	0	1	0	0	0	0	0	0	0	0	0	0	0	2	2	1	2	1
C21orf49__chr21	0	0	0	0	0	0	0	0	0	0	0	0	0	0	0	0	0	0	0	0	0	0	0	0	0	0	0	0	0	0	0	0	0	0	0	0	0	0	0	0	0	0	0	0	0	0	0	0	0
C21orf58__chr21	3	0	0	0	0	0	0	0	3	2	0	0	0	0	0	0	0	1	0	0	0	2	0	0	9,01	0	0	0	0	2	2	0	11,01	0	0	0	0	0	0	0	0	0	0	0	2	0	0	1	1
C21orf59__chr21	3	0	2	4	3	3	1	0	5	5	1	0	4	2	0	2	0	1	0	1	3	6	0	3	6	0	1	0	0	0	1	0	3	2	0	0	0	0	0	0	0	0	0	1	1	0	0	4	3
C21orf62__chr21	0	0	0	0	0	0	0	0	0	0	0	0	0	0	0	0	0	0	0	0	0	0	0	0	0	0	0	0	0	0	0	0	0	0	0	0	0	0	0	0	0	0	0	0	0	0	0	0	0
C21orf67__chr21	0	0	0	0	0	0	0	0	0	0	0	0	0	0	0	0	0	0	0	0	0	0	0	0	0	0	0	0	0	0	0	0	0	0	0	0	0	0	0	0	0	0	0	0	0	0	0	0	0
C21orf7__chr21	1	0	0	0	0	0	0	0	0	0	0	0	0	0	0	1	0	2	0	0	0	0	0	0	0	0	0	0	0	0	0	0	0	1	0	0	0	0	0	0	0	0	0	1	0	0	0	0	2
C21orf88__chr21	0	0	0	0	0	0	0	0	0	0	0	0	0	0	0	0	0	0	0	0	0	0	0	0	0	0	0	0	0	0	0	0	0	0	0	0	0	0	0	0	0	0	0	0	0	0	0	0	0
C21orf91__chr21	1	0	1	0	2	0	0	0	0	0	0	0	0	0	0	0	0	0	0	0	0	3	0	0	0	0	0	0	0	1	0	0	0	0	0	0	0	0	0	0	0	0	0	0	0	1	1	0	0
C22orf15__chr22	0	0	0	0	0	0	0	0	0	0	0	0	0	0	0	0	0	0	0	0	0	0	0	0	0	0	0	0	0	0	0	0	0	0	0	0	0	0	0	0	0	0	0	0	0	0	0	0	0
C22orf23__chr22	1	0	0	0	0	0	0	0	0	0	0	0	0	0	0	0	0	0	0	0	0	1	0	0	0	0	0	0	0	0	0	0	0	0	0	0	0	0	0	0	0	0	0	0	0	1	0	0	0
C22orf26__chr22	0	0	0	0	0	0	0	0	0	0	0	0	0	0	0	0	0	0	0	0	0	0	0	0	0	0	0	0	0	0	0	0	0	0	0	0	0	0	0	0	0	0	0	0	0	0	0	0	0
C22orf28__chr22	4	0	5	7,01	7,01	4	0	0	12,02	7,01	5	0	8,01	2	0	7,01	0	5	0	8,01	7,01	10,01	0	0	3	0	1	2	1	4	4	0	9,01	2	0	0	0	0	0	0	0	0	0	5	5	7,01	4	3	3
C22orf29__chr22	3	0	1	3	3	0	1	0	2	1	0	0	1	0	0	1	0	1	0	1	1	0	0	0	1	0	0	0	1	1	0	0	3	0	0	0	0	0	1	0	0	0	0	0	0	2	3	0	2
C22orf32__chr22	4	0	0	1	1	2	1	0	1	3	2	0	2	0	0	2	0	2	0	8,01	1	1	0	0	4	0	2	3	0	0	3	0	4	3	0	0	0	0	0	0	0	0	0	0	0	0	1	1	2
C22orf39__chr22	2	0	2	4	2	3	0	0	3	2	4	0	1	4	0	1	1	0	0	3	2	1	0	0	6	0	1	1	0	1	7,01	0	4	1	0	0	0	0	0	0	0	0	0	2	1	1	3	0	1
C22orf43__chr22	0	0	0	0	0	0	0	0	0	0	0	0	0	0	0	0	0	0	0	0	0	0	0	0	0	0	0	0	0	0	0	0	0	0	0	0	0	0	0	0	0	0	0	0	0	0	0	0	0
C22orf46__chr22	0	0	0	0	1	0	0	0	0	0	0	0	0	1	0	0	0	1	0	0	0	0	0	0	1	0	0	0	0	0	1	0	0	1	0	0	0	0	0	0	0	0	0	0	0	0	1	0	1
C2CD2L__chr11	1	0	0	1	3	0	0	0	3	0	0	0	0	1	0	0	0	0	0	0	4	0	0	0	1	0	0	0	0	0	0	0	1	1	0	0	0	0	0	0	0	0	0	0	0	0	0	0	0
C2CD2__chr21	1	0	0	2	0	2	0	0	0	0	0	0	2	0	0	2	0	0	0	1	0	0	0	0	0	0	0	0	1	0	1	0	0	2	0	0	0	0	0	0	0	0	0	1	0	0	1	0	0
C2CD3__chr11	0	0	0	0	0	0	0	0	0	0	0	0	0	0	0	0	0	0	0	0	0	0	0	0	0	0	0	0	0	0	0	0	0	0	0	0	0	0	0	0	0	0	0	0	0	0	0	0	0
C2CD4C__chr19	0	0	0	0	0	0	0	0	0	1	0	0	0	0	0	0	0	0	0	0	0	0	0	0	0	0	0	0	0	0	0	0	0	0	0	0	0	0	0	0	0	0	0	0	0	0	0	0	0
C2CD5__chr12	11,01	0	2	5	4	7,01	0	0	6	2	1	1	3	2	0	0	0	1	1	3	1	4	0	0	2	0	3	0	2	0	2	0	4	0	0	0	0	0	0	0	0	0	0	0	3	1	1	5	2
C2__chr6	0	0	0	0	0	0	0	0	0	0	0	0	0	0	0	0	0	0	0	0	0	0	0	0	0	0	0	0	0	0	0	0	0	0	0	0	0	0	0	0	0	0	0	0	0	0	0	0	0
C2orf15__chr2	0	0	0	0	0	0	1	0	0	0	0	0	0	0	0	0	0	0	0	1	0	0	0	0	0	0	0	0	0	0	0	0	0	0	0	0	0	0	0	0	0	0	0	0	0	0	0	0	0
C2orf29__chr2	1	0	4	2	1	4	0	0	6	5	1	0	0	2	0	4	0	2	0	3	2	5	0	0	2	0	0	1	0	2	4	0	2	1	0	0	0	0	0	0	0	0	0	2	1	0	2	1	5
C2orf42__chr2	1	0	0	1	0	0	0	0	0	0	0	0	0	1	0	0	0	0	0	0	0	1	0	0	1	0	0	0	0	0	2	0	0	0	0	0	0	0	0	0	0	0	0	0	1	0	2	0	2
C2orf43__chr2	1	0	0	1	0	0	0	0	2	1	1	0	1	0	0	0	0	0	0	0	0	0	0	0	2	0	0	0	0	0	2	0	1	0	0	0	0	0	0	0	0	0	0	0	0	0	0	1	0
C2orf44__chr2	0	0	0	1	0	0	0	0	1	0	1	0	1	1	0	0	0	0	0	1	0	0	0	0	0	0	0	0	1	0	0	0	0	0	0	0	0	0	0	0	0	0	0	0	0	1	0	1	2
C2orf47__chr2	4	0	1	3	2	2	2	0	3	5	1	0	0	1	0	1	0	2	0	3	2	2	0	0	3	0	0	1	0	0	0	0	4	0	0	0	0	0	0	0	0	0	0	1	0	2	0	2	3
C2orf49__chr2	0	0	0	0	0	0	1	0	0	2	1	0	0	1	0	1	0	1	0	2	0	2	0	0	2	0	0	0	0	0	0	0	0	0	0	0	0	0	0	0	0	0	0	0	0	1	0	1	0
C2orf54__chr2	0	0	0	0	0	0	0	0	1	0	0	0	0	0	0	0	0	0	0	0	0	0	0	0	0	0	0	0	0	0	0	0	0	0	0	0	0	0	0	0	0	0	0	0	0	0	0	0	0
C2orf62__chr2	0	0	0	0	0	0	0	0	0	0	0	0	0	0	0	0	0	0	0	0	0	0	0	0	0	0	0	0	0	0	0	0	0	0	0	0	0	0	0	0	0	0	0	0	0	0	0	0	0
C2orf65__chr2	0	0	0	0	0	0	0	0	0	0	0	0	0	0	0	0	0	0	0	0	0	0	0	0	0	0	0	0	0	0	0	0	0	1	0	0	0	0	0	0	0	0	0	0	0	0	0	0	0
C2orf66__chr2	0	0	0	0	0	0	0	0	0	0	0	0	0	0	0	0	0	0	0	0	0	0	0	0	0	0	0	0	0	0	0	0	0	0	0	0	0	0	0	0	0	0	0	0	2	0	0	0	0
C2orf68__chr2	2	0	0	1	3	1	4	0	3	1	1	0	3	2	0	2	0	1	0	5	1	0	0	0	1	0	0	0	0	1	1	1	1	1	0	0	0	0	0	0	0	0	0	1	0	0	0	0	6
C2orf69__chr2	16,03	0	1	5	1	0	0	0	13,02	2	2	0	2	0	0	0	0	4	0	1	1	1	1	0	12,02	0	1	0	0	0	6	1	10,01	0	0	0	0	0	0	0	0	0	0	0	2	5	1	0	9,01
C2orf73__chr2	0	0	0	0	0	0	0	0	0	0	0	0	0	0	0	0	0	0	0	0	0	0	0	0	0	0	0	0	0	1	0	0	0	0	0	0	0	0	0	0	0	0	0	0	0	0	0	0	0
C2orf74__chr2	0	0	1	2	0	2	0	0	0	0	0	0	0	0	0	2	0	0	0	0	1	0	0	0	2	0	1	0	0	1	0	0	0	1	0	0	0	0	0	0	0	0	0	1	0	0	1	0	0
C2orf76__chr2	0	0	0	0	0	0	1	0	0	0	0	0	0	0	0	0	0	0	0	0	0	1	0	0	1	0	0	0	0	0	0	0	0	0	0	0	0	0	0	0	0	0	0	1	0	0	0	0	1
C2orf78__chr2	0	0	0	0	0	0	0	0	0	0	0	0	0	0	0	0	0	0	0	0	0	0	0	0	0	0	0	0	0	0	0	0	0	0	0	0	0	0	0	0	0	0	0	0	0	0	0	0	0
C2orf81__chr2	0	0	1	0	0	0	0	0	0	0	0	0	0	2	0	1	0	0	0	0	0	1	0	0	1	0	0	0	0	0	0	0	0	0	0	0	0	0	0	0	0	0	0	0	0	0	0	2	0
C2orf82__chr2	0	0	0	0	0	0	0	0	0	0	0	0	0	0	0	0	0	0	0	0	0	0	0	0	0	0	0	0	0	0	0	0	0	0	0	0	0	0	0	0	0	0	0	0	0	0	0	0	0
C2orf91__chr2	0	0	0	0	0	0	0	0	0	0	0	0	0	0	0	0	0	0	0	0	1	0	0	0	0	0	0	0	0	0	0	0	0	0	0	0	0	0	0	0	0	0	0	0	0	0	0	0	0
C3AR1__chr12	0	0	0	0	0	0	0	0	0	0	0	0	0	0	0	0	0	0	0	0	0	0	0	0	0	0	0	0	0	0	0	0	0	0	0	0	0	0	0	0	0	0	0	0	0	0	0	0	2
C3__chr19	0	0	0	0	0	0	0	0	0	0	0	0	0	0	0	0	0	0	0	0	0	0	0	0	0	0	0	0	0	0	0	0	0	0	0	0	0	0	0	0	0	0	0	0	1	0	0	0	0
C3orf14__chr3	1	0	0	1	0	0	0	0	0	0	0	0	1	0	0	0	0	0	0	0	0	0	0	0	0	0	0	0	0	0	0	0	2	0	0	0	0	0	0	0	0	0	0	0	0	0	0	0	2
C3orf17__chr3	1	0	0	3	0	0	2	0	3	4	2	0	1	2	0	0	0	2	0	0	0	7,01	0	0	0	0	3	2	0	1	4	0	5	1	0	0	1	0	0	0	0	0	0	3	3	2	3	2	1
C3orf18__chr3	1	0	0	0	0	0	0	0	0	0	0	0	0	0	0	0	0	0	0	1	0	0	0	0	0	0	0	0	0	0	0	0	0	0	0	0	0	0	0	0	0	0	0	0	1	0	0	0	0
C3orf30__chr3	0	0	0	0	0	0	0	0	0	0	0	0	0	0	0	0	0	0	0	0	0	0	0	0	0	0	0	0	0	0	0	0	0	0	0	0	0	0	1	0	0	0	0	0	0	0	0	0	0
C3orf33__chr3	0	0	0	1	1	1	0	0	0	0	0	0	0	1	0	0	0	0	0	0	0	0	0	0	0	0	0	0	0	1	0	0	0	1	0	0	0	0	0	0	0	0	0	0	0	0	0	1	0
C3orf35__chr3	0	0	0	0	0	0	0	0	0	0	0	0	0	0	0	0	0	0	0	0	1	0	0	0	0	0	0	0	0	0	0	0	0	0	0	0	0	0	0	0	0	0	0	0	0	0	0	0	0
C3orf37__chr3	1	0	0	1	9,01	2	1	0	0	5	1	0	0	1	0	4	0	3	0	0	2	4	0	0	2	0	1	2	0	2	0	0	5	0	0	0	0	0	0	0	0	0	0	2	0	4	0	0	1
C3orf38__chr3	1	0	2	2	0	2	1	0	2	0	4	0	1	1	0	4	0	1	0	2	2	0	0	0	4	0	0	0	0	1	7,01	0	3	0	0	0	0	0	0	0	0	0	0	4	1	0	3	0	4
C3orf43__chr3	0	0	0	0	0	0	0	0	0	0	0	0	0	0	0	0	0	0	0	0	0	0	0	0	0	0	0	0	0	0	0	0	0	0	0	0	0	0	0	0	0	0	0	0	0	0	0	0	0
C3orf49__chr3	0	0	0	0	0	0	0	0	0	0	0	0	0	0	0	0	0	1	0	0	0	0	0	0	0	0	0	0	0	0	0	0	0	0	0	0	0	0	0	0	0	0	0	0	0	0	0	0	0
C3orf52__chr3	2	0	1	0	0	0	0	0	1	0	0	0	0	0	0	0	0	0	0	0	1	0	0	0	3	1	0	2	0	0	0	0	1	1	0	0	0	0	0	0	0	0	0	0	0	1	0	0	2
C3orf55__chr3	0	0	0	0	0	0	0	0	1	0	2	0	0	0	0	0	0	2	0	2	2	0	0	0	0	0	0	0	0	1	1	0	0	0	0	0	0	0	0	0	0	0	0	1	0	0	0	3	1
C3orf58__chr3	1	0	0	1	1	0	0	0	3	2	0	0	1	0	0	0	0	0	0	0	1	0	0	0	1	0	0	0	1	1	0	0	0	1	0	0	0	1	0	0	0	0	0	3	0	0	0	1	2
C3orf62__chr3	4	0	0	0	0	0	1	0	0	0	0	0	0	2	0	0	0	1	0	0	2	0	0	0	1	0	0	0	0	0	1	0	0	0	0	0	0	0	0	0	0	0	0	1	0	0	0	1	0
C3orf67__chr3	0	0	0	0	0	0	0	0	0	0	0	0	0	0	0	0	0	0	0	0	0	0	0	0	0	0	0	0	0	0	0	0	1	0	0	0	0	0	0	0	0	0	0	0	0	0	0	0	0
C3orf70__chr3	0	0	0	0	0	0	0	0	0	0	0	0	0	0	0	0	0	0	0	0	0	0	0	0	0	0	0	0	0	0	0	0	0	0	0	0	0	0	0	0	0	0	0	0	0	0	0	0	0
C3orf72__chr3	0	0	0	0	0	0	0	0	0	1	0	0	0	0	0	0	0	1	0	0	0	0	0	0	0	0	0	0	0	1	0	0	0	0	0	0	0	0	0	0	0	0	0	0	0	0	0	0	0
C3orf80__chr3	0	0	0	0	0	0	0	0	0	0	0	0	0	0	0	0	0	0	0	0	0	0	0	0	0	0	0	0	0	0	0	0	0	0	0	0	0	0	0	0	0	0	0	2	0	0	0	0	0
C4BPA__chr1	0	0	0	0	0	0	0	0	0	0	0	0	0	0	0	0	0	0	0	0	0	0	0	0	0	0	0	0	0	0	0	0	0	0	0	0	0	0	0	0	0	0	0	0	0	0	0	0	0
C4orf19__chr4	0	0	0	0	0	0	0	0	0	0	0	0	0	0	0	0	0	0	0	0	0	0	0	0	0	0	0	0	0	0	0	0	0	0	0	0	0	0	0	0	0	0	1	0	0	0	0	0	0
C4orf21__chr4	1	0	0	1	0	0	0	0	1	0	0	0	0	0	0	1	0	0	0	0	1	1	0	0	1	0	0	0	0	0	1	0	1	0	0	0	0	0	0	0	0	0	0	0	0	0	0	0	0
C4orf22__chr4	0	0	0	0	0	1	1	0	0	0	0	0	0	0	0	0	0	0	0	0	0	0	0	0	0	0	0	0	0	0	0	0	0	0	0	0	0	0	0	0	0	0	0	0	0	0	0	0	0
C4orf26__chr4	0	0	0	0	0	0	0	0	0	0	0	0	0	0	0	0	0	0	0	0	0	0	0	0	0	0	2	0	0	0	0	0	0	0	0	0	0	0	0	0	0	0	0	0	0	0	0	0	0
C4orf27__chr4	3	0	2	3	3	1	0	0	6	5	0	0	0	2	0	1	0	2	0	2	1	3	0	0	5	0	2	1	0	1	3	0	3	2	0	0	0	0	0	0	0	0	0	0	1	1	1	1	5
C4orf29__chr4	0	0	0	1	0	0	0	0	0	0	0	0	0	0	0	0	0	0	0	0	0	0	0	0	0	0	0	0	0	0	0	0	0	0	0	0	0	0	0	0	0	0	0	0	0	0	0	0	0
C4orf32__chr4	0	0	0	2	0	0	0	0	3	0	0	0	0	0	0	0	0	0	0	0	1	0	0	0	1	0	0	0	0	0	0	0	1	0	0	0	0	0	0	0	0	0	0	0	0	0	0	0	1
C4orf33__chr4	1	0	0	1	1	3	1	0	1	0	0	0	0	2	0	1	0	0	0	1	1	1	0	0	0	0	0	0	0	0	2	0	0	1	0	0	0	0	0	0	0	0	0	0	0	0	0	2	0
C4orf3__chr4	4	0	6	5	5	6	5	0	6	5	9,01	0	6	14,02	0	3	0	7,01	0	16,03	2	9,01	0	0	10,01	0	3	2	2	8,01	6	0	1	7,01	0	0	0	0	0	0	0	0	1	7,01	12,02	2	3	13,02	5
C4orf46__chr4	8,01	0	0	7,01	3	1	0	0	13,02	2	0	0	0	17,03	0	1	0	1	0	1	2	7,01	0	0	6	0	0	0	0	3	5	0	10,01	0	0	0	0	0	0	0	1	0	0	0	0	3	0	1	8,01
C4orf47__chr4	0	0	0	0	0	0	0	0	0	0	0	0	0	0	0	0	0	0	0	0	0	0	0	0	0	0	0	0	0	0	1	0	0	0	0	0	0	0	0	0	0	0	0	0	0	0	0	1	0
C4orf48__chr4	8,01	0	3	13,02	0	4	2	0	5	3	2	0	3	0	0	4	0	0	0	4	0	6	0	0	6	0	2	0	0	5	3	0	7,01	2	0	0	0	0	0	0	0	0	0	8,01	4	3	1	2	10,01
C4orf52__chr4	0	0	3	2	0	5	1	0	1	4	2	0	2	1	0	0	0	4	0	3	1	2	0	0	4	0	2	0	0	1	1	0	2	0	0	1	0	0	0	0	0	0	0	4	1	1	0	0	1
C5AR1__chr19	0	0	0	0	0	0	0	0	0	0	1	0	0	0	0	0	0	0	0	0	0	0	0	0	0	0	1	0	0	1	0	0	0	0	0	0	0	0	0	0	0	0	0	3	3	0	0	1	0
C5__chr9	0	0	0	0	0	0	0	0	0	0	0	0	0	0	0	1	0	0	0	0	0	1	0	0	3	0	0	0	1	0	0	0	1	1	0	0	0	0	0	0	0	0	0	0	0	0	0	0	0
C5orf15__chr5	17,03	0	7,01	10,01	7,01	8,01	6	0	6	6	9,01	0	5	11,01	0	8,01	0	7,01	0	16,03	4	17,03	0	0	13,02	0	3	4	3	13,02	11,01	0	12,02	7,01	0	0	0	0	0	0	0	0	0	8,01	16,03	12,02	6	14,02	10,01
C5orf22__chr5	2	0	1	1	3	1	0	0	1	3	1	0	0	3	0	2	0	3	0	2	0	1	0	0	2	0	0	1	0	1	1	0	0	0	0	0	0	0	0	0	0	0	0	0	1	2	1	0	3
C5orf24__chr5	8,01	2	14,02	14,02	4	6	10,01	0	12,02	6	5	1	11,01	5	0	6	0	7,01	0	18,04	5	9,01	0	0	20,05	0	3	8,01	1	10,01	8,01	0	5	10,01	0	0	1	1	0	0	0	0	0	5	9,01	5	6	8,01	4
C5orf27__chr5	0	0	0	0	0	0	0	0	0	0	0	0	0	0	0	0	0	0	0	0	0	0	0	0	0	0	0	0	0	0	0	0	0	0	0	0	0	0	0	0	0	0	0	0	0	0	0	0	0
C5orf28__chr5	1	0	1	1	1	2	0	0	0	2	0	0	0	1	0	1	0	0	0	0	0	1	0	0	2	0	0	0	0	0	0	0	1	0	0	0	0	0	0	0	0	0	0	0	2	1	0	2	2
C5orf30__chr5	4	0	1	17,03	8,01	0	1	0	5	22,06	3	0	1	2	0	9,01	0	3	0	2	7,01	2	0	0	0	0	2	6	0	0	1	0	7,01	1	0	0	0	0	0	0	0	0	0	3	10,01	0	6	1	4
C5orf34__chr5	0	0	0	3	0	0	0	0	1	0	0	0	0	0	0	0	0	0	0	0	0	2	0	0	2	0	0	0	0	0	1	0	2	0	0	0	0	0	0	0	0	0	0	0	0	0	0	0	5
C5orf42__chr5	1	0	0	3	0	1	0	0	1	4	0	0	0	0	0	0	0	0	0	3	1	4	0	0	0	0	1	0	0	0	0	0	5	0	0	0	0	0	0	0	0	0	0	0	3	0	0	3	1
C5orf44__chr5	0	0	0	3	1	2	0	0	2	5	1	0	0	2	0	2	0	0	0	1	0	3	0	0	2	0	0	0	1	3	2	0	2	0	0	0	0	0	0	0	0	0	0	1	3	3	0	1	3
C5orf46__chr5	0	0	0	0	0	0	1	0	0	0	0	0	0	0	0	0	0	0	0	0	0	0	0	0	0	0	0	0	0	0	0	0	0	0	0	0	0	0	0	0	0	0	0	0	0	0	0	0	0
C5orf48__chr5	0	0	0	0	0	0	0	0	0	0	0	0	0	0	0	0	0	0	0	0	0	0	0	0	0	0	0	0	0	0	0	0	0	0	0	0	0	0	0	0	0	0	0	0	0	0	0	0	0
C5orf4__chr5	0	0	1	0	0	1	0	0	0	0	0	0	0	3	0	1	0	0	0	0	0	2	0	0	0	0	1	0	0	1	0	0	0	0	0	0	0	0	0	0	0	0	0	4	0	0	0	0	0
C5orf51__chr5	0	0	2	0	1	3	6	0	1	0	0	0	1	0	0	0	0	2	0	0	1	1	0	0	1	0	0	0	0	0	0	0	2	2	0	0	0	0	1	0	0	0	0	0	2	1	1	0	2
C5orf54__chr5	0	0	0	1	0	1	0	0	0	0	0	0	0	0	0	0	0	0	0	1	1	1	0	0	0	0	0	1	0	0	0	0	0	0	0	0	0	0	0	0	0	0	0	2	1	2	0	0	1
C5orf55__chr5	0	0	0	0	0	0	0	0	0	1	0	1	0	0	0	2	0	0	0	1	0	1	0	0	0	0	1	0	0	0	0	0	0	1	0	0	0	0	0	0	0	0	0	1	0	0	0	0	0
C5orf56__chr5	0	0	0	0	0	0	1	0	1	0	2	0	0	2	0	0	0	0	0	1	0	1	0	0	0	0	0	0	0	0	1	0	0	0	0	0	0	0	0	0	0	0	0	1	0	0	0	1	0
C5orf63__chr5	0	0	0	0	0	0	0	0	0	0	0	0	0	0	0	0	0	0	0	0	0	0	0	0	0	0	0	0	0	0	0	0	0	0	0	0	0	0	0	0	0	0	0	0	0	0	0	0	0
C5orf64__chr5	0	0	0	0	0	0	0	0	0	0	0	0	0	0	0	0	0	0	0	0	0	0	0	0	0	0	0	0	0	0	0	0	0	0	0	0	0	0	0	0	0	0	0	0	0	0	0	0	0
C6orf106__chr6	0	0	0	0	2	2	0	0	1	1	1	0	0	0	0	0	0	1	0	1	1	1	0	0	5	0	2	1	1	0	0	0	3	0	0	0	0	0	0	0	0	0	0	0	1	2	0	3	3
C6orf120__chr6	2	0	1	6	4	4	2	0	7,01	9,01	3	0	4	0	0	7,01	0	3	0	3	1	1	0	0	1	0	0	1	1	2	2	0	7,01	2	0	0	0	0	0	0	1	0	1	3	4	3	2	0	4
C6orf132__chr6	0	0	0	0	0	0	0	0	0	1	0	0	0	0	0	1	0	1	0	0	1	0	0	0	0	0	0	0	0	0	0	0	0	0	0	0	0	0	0	0	0	0	0	0	0	0	1	0	0
C6orf136__chr6	4	0	5	4	2	2	1	0	4	1	2	0	0	1	0	1	0	0	0	3	0	6	0	0	5	0	1	0	0	0	4	0	0	0	0	0	0	0	0	0	0	0	0	3	0	3	0	0	3
C6orf141__chr6	0	0	0	0	0	0	0	0	0	0	0	0	0	0	0	0	0	1	0	0	0	0	0	0	1	0	0	0	0	0	0	0	0	0	0	0	0	0	0	0	0	0	0	0	0	0	0	0	0
C6orf147__chr6	0	0	0	0	1	0	0	0	0	0	1	0	0	2	0	0	0	0	0	0	0	0	0	0	0	0	0	0	0	0	0	0	0	1	0	0	0	0	0	0	0	0	0	0	0	0	0	0	1
C6orf163__chr6	0	0	0	0	0	0	0	0	0	0	0	0	0	0	0	0	0	0	0	0	0	0	0	0	0	0	0	0	0	0	0	0	0	0	0	0	0	0	0	0	0	0	0	0	0	0	0	0	0
C6orf164__chr6	0	0	0	0	0	0	0	0	0	0	0	0	0	0	0	0	0	1	0	0	0	0	0	0	0	0	0	0	0	0	0	0	0	0	0	0	0	0	0	0	0	0	0	0	0	0	0	0	0
C6orf165__chr6	0	0	0	0	0	0	0	0	0	0	0	0	0	0	0	0	0	0	0	0	0	0	0	0	0	0	0	0	0	0	0	0	0	0	0	0	0	0	0	0	0	0	0	0	0	0	0	0	0
C6orf170__chr6	0	0	0	0	0	0	1	0	0	0	0	0	0	0	0	0	0	1	0	0	0	0	0	0	0	0	0	0	0	0	0	0	1	0	0	0	0	0	0	0	0	0	0	1	0	0	0	0	0
C6orf1__chr6	3	0	0	0	1	2	0	0	4	2	0	0	4	0	0	0	0	1	0	3	2	1	0	0	1	0	0	0	0	0	1	0	4	0	0	0	0	0	0	0	0	0	0	0	1	0	0	2	0
C6orf203__chr6	3	0	0	2	2	2	1	0	0	2	1	0	5	1	0	0	0	0	0	2	0	0	0	0	1	0	1	2	0	0	2	0	5	2	0	0	0	0	0	0	0	0	0	2	3	4	0	0	3
C6orf211__chr6	2	0	0	3	4	3	1	0	4	4	0	0	0	1	0	4	0	1	0	3	3	6	0	0	2	0	0	1	0	2	4	0	5	5	0	0	0	0	0	1	0	0	0	3	1	2	1	0	2
C6orf226__chr6	0	0	0	0	0	0	0	0	1	1	0	0	0	4	0	1	0	0	0	0	0	0	0	0	0	0	0	0	0	0	0	0	0	0	0	0	0	0	0	0	0	0	0	0	0	0	0	0	0
C6orf47__chr6	1	0	0	1	0	2	0	0	0	1	0	0	1	0	0	1	0	0	0	1	3	2	0	0	2	0	0	0	0	0	1	0	0	0	0	0	0	0	0	0	1	0	0	1	0	2	0	2	1
C6orf48__chr6	12,02	0	9,01	18,04	10,01	8,01	6	0	12,02	11,01	9,01	0	6	4	1	16,03	0	12,02	0	22,06	8,01	21,05	0	0	22,06	0	5	7,01	2	10,01	4	0	15,03	5	0	1	0	0	0	0	0	0	1	11,01	10,01	6	9,01	10,01	13,02
C6orf52__chr6	0	0	0	0	0	0	0	0	0	0	0	0	0	0	0	0	0	0	0	0	0	0	0	0	0	0	0	0	0	0	0	0	0	0	0	0	0	0	0	0	0	0	0	0	0	0	0	0	0
C6orf57__chr6	1	0	0	0	0	0	0	0	0	0	0	0	0	0	0	0	0	0	0	0	0	0	0	0	0	0	0	0	0	0	0	0	0	0	0	0	0	0	0	0	0	0	0	0	0	0	0	0	0
C6orf62__chr6	9,01	0	4	8,01	7,01	8,01	5	0	11,01	13,02	4	0	8,01	7,01	0	19,04	0	5	0	14,02	8,01	22,06	0	0	7,01	0	3	2	1	7,01	3	0	23,06	5	0	0	0	0	1	0	0	0	0	10,01	17,03	11,01	4	5	7,01
C6orf70__chr6	1	0	1	1	0	1	0	0	1	0	0	0	1	0	0	2	0	0	0	1	0	0	0	0	0	0	1	0	1	0	3	0	0	0	0	0	0	0	0	0	0	0	0	1	1	2	0	1	2
C6orf89__chr6	5	0	1	3	0	0	1	0	9,01	2	0	0	2	4	0	3	0	3	0	9,01	2	1	0	0	2	0	1	1	0	3	5	0	3	2	0	0	0	0	0	0	0	0	0	1	4	3	0	1	1
C6orf99__chr6	0	0	0	0	0	0	0	0	0	0	0	0	0	0	0	0	0	0	0	0	0	0	0	0	0	0	0	0	0	0	0	0	0	0	0	0	0	0	0	0	0	0	0	0	0	0	0	0	0
C7orf10__chr7	0	0	0	0	0	0	0	0	0	0	0	0	0	0	0	1	0	0	0	0	1	0	0	0	0	0	0	0	1	1	0	0	0	0	0	0	0	0	0	0	0	0	0	0	5	0	0	0	1
C7orf13__chr7	1	0	1	1	1	1	0	0	2	2	0	0	0	1	0	0	0	1	0	4	0	0	0	0	0	0	0	0	1	0	2	0	0	0	0	0	0	0	0	0	0	0	0	0	0	1	1	1	0
C7orf25__chr7	0	0	1	0	1	0	0	0	0	2	0	0	0	0	0	3	0	1	0	0	1	1	0	0	2	0	2	0	1	2	0	0	0	0	0	0	0	0	0	0	0	0	0	0	0	0	0	1	2
C7orf26__chr7	0	0	0	1	0	1	0	0	0	0	0	0	0	0	0	0	0	0	0	1	1	1	0	0	0	0	0	0	0	0	1	0	2	0	0	0	0	0	0	0	0	0	0	0	0	0	1	2	0
C7orf29__chr7	0	0	0	0	0	0	0	0	0	0	0	0	0	0	0	0	0	0	0	0	0	0	0	0	0	0	0	0	0	0	0	0	0	0	0	0	0	0	0	0	0	0	0	0	0	0	0	0	0
C7orf31__chr7	0	0	0	0	0	0	0	0	0	0	0	0	0	0	0	0	0	0	0	0	0	0	0	0	0	0	0	0	0	0	0	0	0	0	0	0	0	0	0	0	0	0	0	0	0	0	0	0	0
C7orf41__chr7	0	0	0	0	1	0	0	0	3	0	3	0	0	0	0	0	0	3	0	1	1	0	0	0	2	0	0	0	0	1	0	0	2	0	0	0	0	0	0	0	0	0	0	0	2	0	2	1	1
C7orf43__chr7	0	0	2	0	0	1	0	0	0	0	0	0	0	0	0	0	0	0	0	1	0	1	0	0	0	0	0	0	1	0	1	0	0	0	0	0	0	0	0	0	0	0	0	1	0	1	0	0	0
C7orf49__chr7	0	0	0	0	1	0	0	0	0	0	0	0	0	0	0	0	0	0	0	0	0	1	0	0	0	0	0	0	0	0	1	0	0	0	0	0	0	0	0	0	0	0	0	0	0	0	0	0	0
C7orf50__chr7	3	0	5	11,01	6	3	1	0	13,02	5	4	0	5	3	0	7,01	0	0	0	11,01	2	7,01	0	0	8,01	0	1	0	0	3	6	0	11,01	3	0	0	0	1	0	0	0	0	0	2	2	7,01	4	3	6
C7orf53__chr7	0	0	0	0	0	0	0	0	0	0	0	0	0	0	0	0	0	0	0	0	0	0	0	0	0	0	0	0	0	0	0	0	0	0	0	0	0	0	0	0	0	0	0	0	0	0	0	1	0
C7orf55-LUC7L2__chr7	0	0	0	0	0	0	0	0	0	0	0	0	0	0	0	0	0	0	0	0	0	0	0	0	0	0	0	0	0	0	0	0	0	0	0	0	0	0	0	0	0	0	0	0	0	1	0	0	0
C7orf55__chr7	0	0	0	0	0	0	0	0	0	1	0	0	0	2	0	1	0	0	0	0	0	0	0	0	0	0	0	0	0	0	0	1	0	0	0	0	0	0	0	0	0	0	0	0	2	0	0	3	1
C7orf60__chr7	2	0	0	3	3	0	3	0	2	1	0	0	2	0	0	0	0	4	0	0	2	0	0	0	0	0	1	0	0	1	0	0	1	2	0	0	0	0	0	0	0	0	0	0	2	1	0	0	3
C7orf61__chr7	0	0	0	0	0	1	0	0	0	0	0	0	0	0	0	0	0	0	0	0	1	2	0	0	0	0	0	0	0	0	0	0	0	0	0	0	0	0	0	0	0	0	1	1	0	0	0	1	1
C7orf63__chr7	0	0	0	0	0	0	0	0	0	0	0	0	0	0	0	0	0	0	0	1	0	0	0	0	0	0	0	0	1	0	0	0	0	0	0	0	0	0	0	0	0	0	0	0	2	0	0	0	0
C7orf65__chr7	0	0	0	0	0	0	0	0	0	0	0	0	0	0	0	0	0	0	0	0	0	0	0	0	0	0	0	0	0	0	0	0	0	0	0	0	0	0	0	0	0	0	0	0	0	0	0	0	0
C7orf69__chr7	0	0	0	0	0	0	0	0	0	0	0	0	0	0	0	0	0	0	0	0	0	0	0	0	0	0	0	0	0	0	0	0	0	0	0	0	0	0	0	0	0	0	0	0	0	0	0	0	0
C7orf73__chr7	21,05	0	4	14,02	6	3	5	0	17,03	14,02	9,01	0	12,02	13,02	0	10,01	0	8,01	0	17,03	10,01	13,02	0	0	14,02	0	2	8,01	1	4	8,01	0	11,01	8,01	0	0	0	0	0	0	0	0	1	7,01	12,02	2	14,02	4	20,05
C8G__chr9	0	0	0	0	0	0	0	0	0	0	0	0	0	0	0	0	0	0	0	0	0	0	0	0	0	0	0	0	0	0	0	0	0	0	0	0	0	0	0	0	0	0	0	0	0	0	0	0	0
C8orf31__chr8	2	0	1	0	0	0	0	0	0	0	0	0	0	0	0	0	0	0	0	0	0	0	0	0	0	0	0	0	0	0	0	0	0	0	0	0	0	0	0	0	0	0	0	0	0	0	0	0	0
C8orf33__chr8	1	0	1	4	2	6	2	0	5	5	3	0	6	0	0	4	0	6	0	4	3	5	0	0	1	0	2	2	0	1	8,01	0	11,01	2	0	0	0	0	0	0	0	0	1	2	0	2	2	4	3
C8orf34__chr8	0	0	0	0	0	0	0	0	0	0	0	0	0	0	0	0	0	0	0	0	0	0	0	0	0	0	0	0	0	0	0	0	0	0	0	0	0	0	0	0	0	0	0	0	0	0	0	0	0
C8orf37__chr8	0	0	0	0	0	0	0	0	0	0	0	0	0	0	0	0	0	0	0	0	0	0	0	0	0	0	0	0	0	0	0	0	1	0	0	0	0	0	0	0	0	0	0	0	0	0	0	0	0
C8orf40__chr8	4	0	2	0	1	5	1	0	1	2	1	0	2	3	0	1	0	2	0	3	2	4	0	0	2	0	0	1	1	2	0	0	0	3	0	0	0	0	0	0	0	0	0	1	1	3	2	2	2
C8orf42__chr8	0	0	0	2	2	0	1	0	1	0	0	0	0	0	0	0	0	0	0	0	0	0	0	0	0	0	1	1	2	0	0	0	0	0	0	0	0	0	0	0	0	0	0	0	0	0	0	0	0
C8orf44__chr8	0	0	0	0	0	0	0	0	0	0	0	0	0	0	0	0	0	1	0	0	0	0	0	0	0	0	0	0	0	0	0	0	1	0	0	0	0	0	0	0	0	0	0	0	0	0	0	1	1
C8orf46__chr8	0	0	0	0	0	0	0	0	0	0	0	0	0	0	0	0	0	0	0	1	0	0	0	0	0	0	0	0	0	0	0	0	0	0	0	0	0	0	0	0	0	0	0	0	1	0	0	0	0
C8orf47__chr8	0	0	0	0	0	0	0	0	0	0	0	0	0	0	0	0	0	0	0	0	0	0	0	0	0	0	0	0	0	0	0	0	0	0	0	0	0	0	0	0	0	0	0	0	1	0	0	0	0
C8orf56__chr8	0	0	0	0	0	0	0	0	0	0	0	0	0	0	0	0	0	0	0	0	0	0	0	0	0	0	0	0	0	0	0	0	0	0	0	0	0	0	0	0	0	0	0	0	0	0	0	0	0
C8orf58__chr8	0	0	1	1	1	2	0	0	1	0	3	0	1	0	0	0	0	2	0	4	1	0	0	0	0	0	0	0	0	0	1	0	1	1	0	0	0	0	0	0	0	0	0	0	0	0	0	3	1
C8orf59__chr8	0	0	1	1	1	4	1	0	4	3	1	0	2	1	0	0	0	1	0	2	0	4	0	0	5	0	2	1	1	1	2	0	5	0	0	0	0	0	0	0	0	0	0	3	3	1	4	0	4
C8orf76__chr8	1	0	0	0	2	1	0	0	0	2	1	0	2	1	0	2	0	0	0	0	1	2	0	0	0	0	0	1	2	2	2	0	1	0	0	0	0	0	0	0	0	0	0	0	0	0	1	0	0
C8orf82__chr8	0	0	1	1	0	1	1	0	1	0	0	0	0	1	0	1	0	0	0	0	0	0	0	0	0	0	0	0	0	0	1	0	3	0	0	0	0	0	0	0	0	0	0	1	2	0	0	1	2
C8orf86__chr8	0	0	0	0	0	0	0	0	0	0	0	0	0	0	0	0	0	0	0	0	0	0	0	0	0	0	0	0	0	0	0	0	0	0	0	0	0	0	0	0	0	0	0	0	0	0	0	0	0
C9__chr5	0	0	0	0	0	0	0	0	0	0	0	0	0	0	0	0	0	0	0	0	0	0	0	0	0	0	0	0	0	0	0	0	0	0	0	0	0	0	0	0	0	0	0	0	0	0	0	0	0
C9orf114__chr9	2	0	1	2	2	0	0	0	1	1	0	0	1	1	0	2	0	0	0	0	2	0	0	0	1	0	0	1	0	2	3	0	2	0	0	0	0	0	0	0	0	0	0	2	2	1	1	1	0
C9orf116__chr9	0	0	0	2	0	0	0	0	0	0	0	0	0	1	0	0	0	0	0	0	0	3	0	0	0	0	0	0	0	0	1	0	2	0	0	0	0	0	0	0	0	0	0	0	1	0	0	0	0
C9orf117__chr9	0	0	0	0	0	0	0	0	0	0	0	0	0	0	0	0	0	0	0	0	0	0	0	0	0	0	0	0	0	0	0	0	0	0	0	0	0	0	0	0	0	0	0	0	0	0	0	0	0
C9orf123__chr9	3	0	2	8,01	5	4	2	0	3	3	4	0	2	5	0	4	0	4	0	3	3	12,02	0	0	8,01	0	0	4	0	0	3	0	2	1	0	0	0	0	0	0	0	0	0	0	1	1	3	1	5
C9orf139__chr9	0	0	0	0	0	0	0	0	0	0	0	0	0	0	0	0	0	0	0	0	0	0	0	0	0	0	0	0	0	1	0	0	0	0	0	0	0	0	0	0	0	0	0	0	0	0	0	0	0
C9orf142__chr9	3	0	3	1	4	0	0	0	8,01	2	1	0	1	1	0	3	0	1	0	2	0	2	0	0	2	0	0	0	0	0	1	0	1	0	0	0	0	0	0	0	0	0	0	0	0	3	1	0	4
C9orf152__chr9	0	0	0	0	0	0	0	0	0	0	0	0	0	0	0	0	0	0	0	0	0	0	0	0	0	0	0	0	0	0	1	0	0	0	0	0	0	0	0	0	0	0	0	0	0	0	0	0	0
C9orf153__chr9	0	0	0	0	0	0	0	0	0	0	0	0	0	0	0	0	0	0	0	0	0	0	0	0	0	0	0	0	0	0	0	0	0	0	0	0	0	0	0	0	0	0	0	0	0	0	0	0	0
C9orf156__chr9	0	0	1	0	0	0	0	0	2	1	0	0	0	0	0	0	0	0	0	0	0	0	0	0	1	0	0	0	0	1	1	0	0	0	0	0	0	0	0	0	0	0	0	0	0	0	0	2	0
C9orf163__chr9	0	0	0	0	0	0	0	0	0	0	0	0	0	0	0	0	0	0	0	0	0	0	0	0	0	0	0	0	0	0	0	0	0	0	0	0	0	0	0	0	0	0	0	0	0	0	0	0	0
C9orf169__chr9	0	0	0	0	0	0	0	0	0	0	0	0	1	0	0	0	0	0	0	0	0	0	0	0	0	0	0	0	0	0	0	0	0	0	0	0	0	0	0	0	0	0	0	0	0	0	0	0	0
C9orf16__chr9	8,01	0	1	9,01	6	5	0	0	9,01	3	5	0	2	2	0	5	0	1	0	5	4	9,01	0	0	7,01	0	4	0	3	2	5	0	2	5	0	0	0	0	0	0	0	0	0	10,01	6	4	3	6	9,01
C9orf24__chr9	0	0	0	0	0	0	0	0	0	0	0	0	0	0	0	0	0	0	0	0	0	0	0	0	0	0	0	0	0	0	0	0	0	0	0	0	0	0	0	0	0	0	0	0	0	0	0	0	0
C9orf37__chr9	1	0	0	0	0	1	0	0	0	0	1	0	0	0	0	1	0	1	0	0	2	0	0	0	4	0	0	0	0	0	1	0	1	1	0	0	0	0	0	0	0	0	0	2	0	0	0	0	2
C9orf3__chr9	0	0	1	0	0	1	1	0	4	0	0	0	0	2	0	5	0	0	0	2	0	1	0	0	1	0	0	0	1	0	1	0	2	0	0	0	0	0	0	0	0	0	0	1	5	0	0	0	0
C9orf40__chr9	1	0	0	5	1	2	0	0	3	4	0	0	0	0	0	0	0	0	0	2	5	3	0	0	3	0	0	1	0	0	0	0	4	0	0	0	0	0	0	0	0	0	0	0	0	1	0	0	4
C9orf41__chr9	1	0	0	1	0	0	0	0	0	0	0	0	0	0	0	1	0	0	0	0	0	0	0	0	0	0	0	0	1	0	0	0	0	0	0	0	0	0	0	0	0	0	0	0	0	0	1	0	0
C9orf43__chr9	0	0	0	0	0	0	1	0	0	0	0	0	0	0	0	0	0	0	0	0	0	0	0	0	0	0	0	0	0	0	0	0	0	0	0	0	0	0	0	0	0	0	0	0	0	0	0	0	0
C9orf47__chr9	0	0	0	0	0	0	0	0	0	0	0	0	0	0	0	1	0	0	0	0	0	0	0	0	0	0	0	0	0	0	0	0	0	0	0	0	0	0	0	0	0	0	0	0	0	0	0	0	0
C9orf50__chr9	0	0	0	0	0	0	0	0	0	0	0	0	0	0	0	0	0	0	0	0	0	0	0	0	0	0	0	0	0	0	0	0	0	0	0	0	0	0	0	0	0	0	0	0	0	0	0	0	0
C9orf64__chr9	0	0	0	3	0	0	0	0	0	0	0	0	0	1	0	0	0	0	0	0	1	0	0	0	0	0	0	0	0	0	0	0	2	0	0	0	0	0	0	0	0	0	0	0	0	0	0	0	2
C9orf66__chr9	0	0	0	0	0	0	0	0	0	0	0	0	0	0	0	0	0	0	0	0	0	0	0	0	0	0	0	0	0	0	0	0	0	0	0	0	0	0	0	0	0	0	0	0	0	0	0	0	0
C9orf69__chr9	4	0	1	1	3	1	1	0	3	1	0	0	1	3	0	2	0	1	0	2	7,01	3	0	0	6	0	0	2	0	1	2	0	7,01	0	0	0	0	0	0	0	0	0	0	0	0	1	1	0	5
C9orf72__chr9	1	0	0	0	3	1	0	0	0	1	0	0	0	0	0	0	0	0	0	1	1	0	0	0	0	0	0	0	0	0	1	0	0	0	0	0	0	0	0	0	0	0	0	0	0	1	1	0	0
C9orf78__chr9	3	0	4	8,01	6	7,01	1	0	7,01	6	3	0	2	0	0	5	0	0	0	4	4	9,01	0	0	9,01	1	1	4	0	1	8,01	0	16,03	4	0	0	0	0	0	0	0	0	0	6	7,01	2	3	5	4
C9orf84__chr9	0	0	0	0	0	0	0	0	0	0	0	0	0	0	0	0	0	0	0	0	0	0	0	0	0	0	0	0	0	0	0	0	0	0	0	0	0	0	0	0	0	0	0	0	0	0	0	0	0
C9orf85__chr9	1	0	1	0	0	1	0	0	1	1	0	0	1	0	0	0	0	0	0	0	0	0	0	0	1	0	1	0	0	1	2	0	0	1	0	0	0	0	0	0	0	0	0	5	2	0	0	0	0
C9orf89__chr9	3	0	6	1	2	10,01	4	0	1	4	0	0	2	3	0	7,01	0	4	0	9,01	5	18,04	1	0	6	0	5	0	0	7,01	2	0	3	0	0	0	0	0	0	0	0	0	0	17,03	6	1	2	8,01	4
C9orf91__chr9	0	0	3	1	1	0	0	0	0	0	0	0	1	0	0	0	0	1	0	0	0	0	0	0	0	0	0	1	1	0	3	0	1	1	0	0	0	0	0	0	0	0	0	0	0	0	2	1	0
C9orf96__chr9	0	0	0	0	0	0	0	0	0	0	0	0	0	0	0	0	0	0	0	0	0	0	0	0	0	0	0	0	0	0	0	0	0	0	0	0	0	0	0	0	0	0	0	0	0	0	0	0	0
C9orf9__chr9	0	0	0	1	1	1	0	0	0	0	0	0	0	1	0	0	0	0	0	0	0	0	0	0	0	0	0	0	0	1	0	0	0	0	0	0	0	0	0	0	0	0	0	2	1	1	0	0	0
CA11__chr19	0	0	1	0	0	0	2	0	0	0	0	0	0	1	0	0	0	1	0	1	0	2	0	0	0	0	0	0	0	2	1	0	0	1	0	0	0	0	0	1	0	0	0	2	3	1	0	4	0
CA12__chr15	0	0	0	0	0	0	0	0	0	0	0	0	0	0	0	0	0	0	0	0	0	0	0	0	0	0	0	0	0	0	0	0	0	0	0	0	0	0	0	0	0	0	0	0	0	0	0	0	0
CA13__chr8	1	0	0	0	0	1	0	1	1	1	0	0	0	0	0	0	0	0	0	0	0	0	0	0	0	0	2	0	0	0	1	0	2	1	0	0	0	0	0	0	0	0	0	0	0	0	2	0	0
CA14__chr1	0	0	0	0	0	0	0	0	0	0	0	0	0	0	0	0	0	0	0	0	0	0	0	0	0	0	0	0	0	0	0	0	0	0	0	0	0	0	0	0	0	0	0	0	0	0	0	0	0
CA3__chr8	0	0	0	0	0	0	0	0	0	0	0	0	0	0	0	0	0	0	0	0	0	0	0	0	0	0	0	0	0	0	0	0	0	0	0	0	0	0	0	0	0	0	0	0	0	0	0	0	0
CA5BP1__chrX	0	0	0	0	0	0	0	0	0	0	0	0	0	0	0	0	0	0	0	0	0	0	0	0	0	0	0	0	0	0	0	0	1	0	0	0	0	0	0	0	0	0	0	0	0	0	0	0	0
CA5B__chrX	0	0	0	0	0	0	0	0	0	0	0	0	0	1	0	0	0	0	0	0	0	0	0	0	0	0	0	0	0	0	0	0	0	0	0	0	0	0	0	0	0	0	0	0	0	1	0	0	0
CA9__chr9	0	0	0	0	0	0	0	0	0	0	0	0	0	2	0	0	0	0	0	0	0	0	0	0	0	0	0	0	0	1	0	0	0	0	0	0	0	0	0	0	0	0	0	0	0	0	0	0	0
CAAP1__chr9	5	0	0	1	0	1	1	0	0	2	2	0	0	0	0	2	0	3	0	3	1	2	0	0	0	0	6	2	0	2	6	0	2	0	0	0	0	0	0	0	0	0	0	0	0	3	0	0	0
CAB39L__chr13	1	0	1	0	0	0	2	0	0	0	0	0	2	0	0	0	0	1	0	0	0	0	0	0	2	0	0	0	0	0	0	0	0	0	0	0	0	0	0	0	0	0	0	1	3	0	0	0	0
CAB39__chr2	5	0	1	4	1	4	1	0	7,01	7,01	0	0	2	4	0	6	0	5	0	12,02	4	11,01	0	0	0	0	1	1	3	0	6	0	12,02	1	0	0	0	0	0	0	0	0	0	3	2	4	7,01	5	5
CABIN1__chr22	2	0	0	3	3	3	1	0	1	2	2	0	0	0	0	0	0	0	0	2	1	2	0	0	4	0	4	0	0	0	1	0	4	0	0	0	0	0	0	0	0	0	0	0	2	1	0	1	2
CABLES1__chr18	3	0	0	2	2	1	1	0	1	0	1	0	0	1	0	1	0	0	0	5	0	0	0	0	1	0	2	0	1	0	2	0	0	2	0	0	0	0	0	0	0	0	0	0	3	1	0	1	0
CABLES2__chr20	4	0	0	2	3	0	0	0	0	4	0	0	0	2	0	1	0	0	0	1	1	1	0	0	0	0	0	0	1	0	1	0	1	0	1	0	0	0	0	0	0	0	0	0	0	0	0	0	1
CABP1__chr12	0	0	0	0	0	0	0	0	0	0	0	0	0	0	0	0	0	0	0	0	0	0	0	0	0	0	0	0	0	0	0	0	0	0	0	0	0	0	0	0	0	0	0	0	0	0	0	0	0
CABP4__chr11	0	0	0	0	0	0	0	0	0	0	0	0	0	0	0	0	0	0	0	0	0	0	0	0	0	0	0	0	0	0	0	0	0	0	0	0	0	0	0	0	0	0	0	0	0	0	0	0	0
CABYR__chr18	1	0	0	0	0	0	0	0	0	0	0	0	0	2	0	0	0	0	0	0	0	0	0	0	0	0	1	0	0	1	0	0	0	0	0	0	0	0	0	1	0	0	0	0	0	0	0	0	0
CACFD1__chr9	0	0	0	0	0	0	0	0	0	0	0	0	0	0	0	0	0	0	0	0	0	1	0	0	0	0	3	0	0	3	1	0	0	0	0	0	0	0	0	0	0	0	0	1	0	0	0	1	0
CACHD1__chr1	1	0	0	1	0	0	0	0	0	0	2	0	0	0	0	0	0	2	0	2	0	1	0	0	0	0	0	0	0	1	1	0	0	1	0	0	0	0	0	0	0	0	0	0	0	0	0	0	0
CACNA1C__chr12	0	0	0	0	0	0	0	0	0	0	0	0	0	0	0	0	0	0	0	0	0	0	0	0	0	0	0	0	0	0	0	0	0	0	0	0	0	0	0	0	0	0	0	0	0	0	0	0	0
CACNA1G__chr17	0	0	0	0	0	0	0	0	0	0	0	0	0	0	0	0	0	0	0	0	0	0	0	0	0	0	0	0	0	0	0	0	0	0	0	0	0	0	0	0	0	0	0	0	0	0	0	0	0
CACNA2D1__chr7	0	0	0	0	1	0	3	0	0	1	0	0	0	1	0	0	0	0	0	2	0	0	0	0	1	0	0	0	0	0	0	0	0	0	0	0	0	0	0	0	0	0	0	0	1	0	0	1	0
CACNA2D3__chr3	0	0	0	0	0	0	0	0	0	0	0	0	0	0	0	0	0	0	0	0	0	0	0	0	0	0	0	0	0	0	0	0	0	0	0	0	0	0	0	0	0	0	0	0	0	0	0	0	0
CACNB1__chr17	3	0	1	0	0	1	0	0	0	0	1	0	0	2	0	0	0	0	0	0	0	0	0	0	0	0	1	0	0	0	0	0	3	1	0	0	0	0	0	0	0	0	0	0	0	0	0	0	0
CACNB2__chr10	0	0	0	0	0	0	0	0	0	0	0	0	0	0	0	0	0	1	0	1	0	0	0	0	0	0	0	0	0	0	0	0	0	0	0	0	0	0	0	0	0	0	0	0	0	0	0	0	0
CACNB3__chr12	5	0	2	2	3	4	1	0	4	1	3	0	3	11,01	0	9,01	0	0	0	6	1	11,01	0	0	6	0	0	2	3	3	2	0	12,02	2	0	0	1	0	0	0	0	1	0	7,01	3	4	0	7,01	2
CACNB4__chr2	0	0	2	0	0	0	0	0	0	0	1	0	0	0	0	0	0	0	0	0	1	0	0	0	0	0	0	0	0	0	1	0	0	0	0	0	0	0	0	0	0	0	0	0	0	0	0	0	0
CACNG2__chr22	0	0	0	1	0	0	0	0	0	0	0	0	0	0	0	0	0	0	0	0	0	0	0	0	0	0	0	0	0	0	0	0	0	0	0	0	0	0	0	0	0	0	0	0	0	0	0	0	0
CACNG4__chr17	0	0	0	0	0	0	0	0	0	0	0	0	0	0	0	0	0	0	0	0	0	0	0	0	0	0	0	0	0	0	0	0	0	0	0	0	0	0	0	0	0	0	0	0	0	0	0	0	0
CACNG6__chr19	0	0	0	0	0	0	0	0	0	0	0	0	0	0	0	0	0	0	0	0	0	0	0	0	0	0	0	0	0	0	0	0	0	0	0	0	0	0	0	0	0	0	0	0	0	0	0	0	1
CACNG7__chr19	0	0	0	0	0	0	0	0	0	0	0	0	0	0	0	0	0	0	0	0	0	0	0	0	0	0	1	0	1	0	0	0	0	0	0	0	0	0	0	0	0	0	0	0	0	0	0	1	0
CACNG8__chr19	1	0	5	1	1	1	0	0	0	0	0	0	0	1	0	1	0	0	0	0	1	1	0	0	1	0	0	0	0	0	0	0	0	1	0	0	0	0	0	0	0	0	1	0	1	1	2	2	1
CACTIN-AS1__chr19	0	0	0	0	0	0	0	0	0	0	0	0	0	0	0	0	0	0	0	0	0	0	0	0	0	0	0	0	0	0	0	0	0	0	0	0	0	0	0	0	0	0	0	0	0	0	0	0	0
CACTIN__chr19	1	0	0	2	1	1	0	0	0	10,01	1	0	0	3	0	2	0	2	0	0	1	2	0	0	4	0	1	1	1	2	0	0	1	2	0	0	0	0	0	0	0	0	0	0	2	1	1	0	1
CACUL1__chr10	2	0	5	12,02	12,02	3	2	0	13,02	5	4	1	1	1	0	6	0	7,01	0	5	6	6	0	0	5	0	3	0	1	1	4	0	9,01	5	0	0	0	0	1	0	0	0	0	7,01	6	3	5	5	14,02
CACYBP__chr1	22,06	1	5	20,05	13,02	4	0	0	21,05	18,04	11,01	0	9,01	5	0	13,02	0	9,01	0	9,01	17,03	10,01	0	0	31,11	0	3	5	2	1	14,02	0	21,05	4	0	0	0	0	0	0	1	0	0	2	3	17,03	6	0	21,05
CADM1__chr11	17,03	0	15,03	6	9,01	9,01	18,04	0	24,07	2	3	0	3	3	0	3	0	13,02	0	19,04	8,01	18,04	0	0	13,02	0	8,01	3	4	5	6	0	3	12,02	0	0	1	0	0	1	0	0	0	27,09	18,04	7,01	4	16,03	9,01
CADM2__chr3	0	0	0	0	0	0	0	0	0	0	0	0	0	0	0	0	0	0	0	0	0	0	0	0	0	0	0	0	0	0	0	0	0	0	0	0	0	0	0	0	0	0	0	0	0	0	0	0	0
CADM4__chr19	0	0	2	0	1	0	1	0	0	0	0	0	0	0	0	0	0	0	0	2	0	0	0	0	0	0	0	0	0	1	0	0	0	0	0	0	0	0	0	0	0	0	0	2	2	0	1	0	3
CADPS2__chr7	0	0	1	0	0	0	0	0	0	0	0	0	0	1	0	0	0	0	0	0	0	2	0	0	0	0	1	0	0	1	0	0	1	0	0	0	0	0	0	0	0	0	0	0	0	0	0	0	2
CADPS__chr3	0	0	0	0	0	0	0	0	0	0	0	0	0	0	0	0	0	0	0	0	0	0	0	0	0	0	0	0	0	0	0	0	0	0	0	0	0	0	0	0	0	0	0	0	0	0	0	0	0
CAD__chr2	4	0	0	6	4	3	0	0	3	7,01	1	0	0	0	0	2	0	2	0	2	4	1	0	0	8,01	0	0	3	0	0	3	0	5	1	0	0	0	0	0	0	0	0	0	0	1	2	1	0	2
CAHM__chr6	0	0	0	0	1	0	0	0	0	1	0	0	0	0	0	0	0	0	0	0	0	0	0	0	0	0	0	0	0	0	0	0	0	0	0	0	0	0	0	0	0	0	0	0	0	0	0	0	0
CALB1__chr8	0	0	0	0	0	0	0	0	0	0	0	0	0	0	0	0	0	0	0	0	0	0	0	0	0	0	0	0	0	0	0	0	0	0	0	0	0	0	0	0	0	0	0	0	0	0	0	0	0
CALB2__chr16	0	0	0	0	0	0	0	0	0	0	0	0	0	0	0	0	0	0	0	0	0	0	0	0	0	0	0	0	0	0	0	0	0	0	0	0	0	0	0	0	0	0	0	0	0	0	0	0	0
CALCOCO1__chr12	3	0	6	7,01	1	5	2	0	5	2	0	0	0	3	0	3	0	1	0	7,01	0	6	0	0	7,01	0	5	1	4	5	4	0	2	2	0	0	1	0	0	0	0	0	2	9,01	11,01	2	0	11,01	5
CALCOCO2__chr17	9,01	0	3	6	3	1	1	0	3	4	2	0	2	3	0	3	0	0	0	2	2	1	0	0	8,01	0	3	3	2	3	1	0	2	2	0	0	0	0	0	0	0	0	0	1	3	5	4	6	1
CALCRL__chr2	0	0	0	0	0	1	0	0	0	0	0	0	0	0	0	0	0	0	0	0	0	1	0	0	0	0	0	0	0	0	0	0	0	0	0	0	0	0	0	0	0	0	0	0	0	0	0	0	0
CALD1__chr7	44,23	0	17,03	33,13	17,03	16,03	21,05	0	28,09	17,03	8,01	0	5	18,04	0	11,01	0	16,03	0	29,1	27,09	21,05	0	0	27,09	1	9,01	3	5	30,11	15,03	0	21,05	10,01	0	0	1	1	0	0	0	0	2	38,17	22,06	12,02	3	6	49,29
CALHM1__chr10	0	0	0	0	0	0	0	0	0	0	0	0	0	0	0	0	0	0	0	0	0	0	0	0	0	0	0	0	0	0	0	0	0	0	0	0	0	0	0	0	0	0	0	0	0	0	0	0	0
CALHM2__chr10	2	0	1	1	0	2	0	0	0	0	0	0	1	0	0	0	0	0	0	1	1	0	0	0	0	0	0	0	2	0	1	0	2	2	0	0	0	0	0	0	0	0	1	2	1	1	0	0	2
CALM1__chr14	32,12	0	3	44,23	15,03	17,03	4	0	53,34	29,1	20,05	0	16,03	13,02	0	15,03	0	21,05	2	19,04	39,18	22,06	0	0	35,15	0	3	13,02	3	5	25,07	0	55,37	10,01	0	0	1	0	0	0	1	0	0	7,01	10,01	12,02	18,04	3	52,33
CALM2__chr2	137,26	2	41,2	108,41	76,7	53,34	36,15	0	193,48	84,86	59,42	0	46,25	51,31	0	56,38	0	48,28	0	96,11	78,74	199,77	0	1	119,72	0	18,04	41,2	22,06	38,17	83,84	1	116,63	36,15	0	0	0	0	1	3	1	0	8,01	60,44	60,44	72,63	43,22	47,27	170,48
CALM3__chr19	18,04	0	5	21,05	9,01	8,01	3	0	25,07	21,05	11,01	1	13,02	6	0	17,03	0	9,01	0	21,05	11,01	27,09	0	0	20,05	0	1	7,01	3	5	26,08	0	21,05	7,01	0	1	0	0	0	0	0	0	0	3	2	14,02	7,01	3	19,04
CALML4__chr15	0	0	0	1	0	0	0	0	1	1	0	0	0	0	0	0	0	2	0	0	1	0	0	0	0	0	0	0	0	0	0	0	1	0	0	0	0	0	0	0	0	0	0	0	0	0	0	0	0
CALN1__chr7	0	0	0	0	0	0	0	0	0	0	0	0	0	0	0	0	0	0	0	1	0	1	0	0	0	0	0	0	0	0	0	0	0	0	0	0	0	0	0	0	0	0	0	0	0	0	0	0	0
CALR__chr19	43,22	0	9,01	69,58	25,07	18,04	28,09	0	49,29	21,05	23,06	0	19,04	42,21	0	26,08	1	22,06	1	50,3	22,06	70,6	0	1	49,29	1	15,03	9,01	4	31,11	29,1	0	47,27	15,03	0	2	1	0	1	1	1	0	1	51,31	54,35	17,03	6	40,19	64,5
CALU__chr7	27,09	0	11,01	61,45	26,08	19,04	15,03	1	24,07	39,18	12,02	2	15,03	32,12	0	28,09	0	6	1	39,18	29,1	55,37	0	0	36,15	0	6	8,01	7,01	15,03	25,07	0	39,18	16,03	0	0	0	0	0	1	1	0	4	15,03	23,06	27,09	16,03	17,03	41,2
CAMK1D__chr10	0	0	4	0	0	0	0	0	0	1	0	0	0	0	0	0	0	2	0	3	0	0	0	0	0	0	0	0	0	1	0	0	0	0	0	0	0	0	0	0	0	0	0	0	0	0	0	0	1
CAMK1G__chr1	0	0	1	0	0	0	0	0	0	0	0	0	1	0	0	0	0	0	0	3	0	0	0	0	0	0	1	0	0	0	0	0	0	0	0	0	0	0	0	0	0	0	0	0	3	1	0	0	0
CAMK1__chr3	4	0	2	1	4	0	1	0	5	1	0	0	0	1	0	2	0	2	0	1	3	2	0	0	1	0	0	1	2	2	1	0	4	2	0	0	0	0	0	0	0	0	0	1	0	1	1	2	3
CAMK2A__chr5	0	0	0	0	0	0	0	0	0	0	0	0	0	0	0	0	0	0	0	1	0	0	0	0	0	0	0	0	0	0	0	0	0	0	0	0	0	0	0	0	0	0	0	1	0	0	0	0	0
CAMK2B__chr7	0	0	0	0	0	0	0	0	0	0	0	0	0	0	0	0	0	0	0	0	0	0	0	0	0	0	0	0	0	0	0	0	0	0	0	0	0	0	0	0	0	0	0	0	0	0	1	0	0
CAMK2D__chr4	0	0	4	3	2	5	1	0	6	3	3	0	1	5	0	2	0	1	0	6	1	0	0	0	6	0	1	2	0	4	1	0	4	3	0	0	0	0	1	0	1	0	0	4	3	2	2	1	5
CAMK2G__chr10	6	0	1	10,01	3	4	1	0	4	2	2	1	1	3	0	3	0	1	0	6	7,01	1	0	0	7,01	0	1	1	1	4	6	0	3	4	0	0	0	0	0	0	0	0	0	3	6	1	1	4	2
CAMK2N1__chr1	10,01	0	2	15,03	7,01	3	1	0	4	12,02	1	0	7,01	1	0	7,01	0	5	0	7,01	11,01	5	0	0	8,01	0	3	7,01	1	2	3	0	5	4	0	0	0	2	0	0	0	0	0	2	1	4	5	10,01	4
CAMK2N2__chr3	0	0	0	2	0	0	0	0	0	2	1	0	0	1	0	1	0	0	0	0	2	0	0	0	0	0	0	0	0	0	2	0	0	0	0	0	0	0	0	0	0	0	0	0	0	0	0	1	0
CAMK4__chr5	0	0	0	0	0	0	0	0	0	0	1	0	0	0	0	0	0	0	0	0	0	2	0	0	0	0	0	0	0	0	1	0	0	0	0	0	0	0	0	0	0	0	0	0	0	0	0	0	0
CAMKK1__chr17	0	0	0	0	0	0	0	0	0	0	1	0	0	0	0	1	0	0	0	0	0	0	0	0	0	0	0	0	0	0	0	0	0	0	0	0	0	0	0	0	0	0	0	0	0	0	0	0	0
CAMKK2__chr12	0	0	2	4	3	4	2	0	5	4	1	0	2	3	0	4	0	2	0	4	2	3	0	0	0	0	1	1	1	1	4	0	3	2	0	0	0	0	0	0	0	0	0	0	1	1	0	1	2
CAMKMT__chr2	0	0	0	1	0	0	0	0	1	3	0	0	0	0	0	0	0	0	0	0	0	0	0	0	0	0	0	0	0	0	0	0	1	0	0	0	0	0	0	0	0	0	0	0	0	0	1	0	0
CAMLG__chr5	4	0	8,01	6	1	3	6	0	4	2	1	0	3	3	0	2	0	5	0	7,01	3	8,01	0	0	3	0	1	1	1	4	3	0	2	1	0	0	0	0	0	0	0	0	0	3	3	3	3	7,01	1
CAMSAP1__chr9	1	0	0	2	4	0	1	0	3	2	0	0	3	1	0	1	0	0	0	3	0	4	0	0	6	1	1	0	0	0	1	0	1	1	0	0	0	0	0	0	0	1	0	0	3	0	0	1	3
CAMSAP2__chr1	3	0	2	4	5	4	2	0	2	1	2	0	1	0	0	5	0	3	0	7,01	2	7,01	0	0	2	0	0	0	2	5	8,01	0	6	1	0	0	0	0	0	0	0	0	0	3	3	5	0	4	3
CAMSAP3__chr19	0	0	0	0	0	0	0	0	0	0	0	0	0	0	0	0	0	0	0	0	0	1	0	0	0	0	0	0	0	0	0	0	0	0	0	0	0	0	0	0	0	0	0	0	0	0	0	0	1
CAMTA1__chr1	9,01	0	5	7,01	7,01	0	2	0	9,01	3	3	0	3	4	0	5	0	1	0	6	0	5	0	0	5	0	2	1	2	3	4	0	4	1	0	0	0	0	0	0	1	0	0	1	5	3	3	3	4
CAMTA2__chr17	4	0	1	8,01	3	0	5	0	4	5	1	0	3	5	0	6	0	2	0	5	2	0	0	0	4	0	0	0	1	5	0	0	5	2	0	0	0	0	0	0	1	0	0	3	5	3	1	3	3
CAND1__chr12	13,02	0	6	16,03	4	8,01	4	0	17,03	15,03	8,01	0	7,01	7,01	0	9,01	0	8,01	0	15,03	11,01	14,02	0	0	15,03	0	5	1	5	8,01	14,02	0	16,03	6	2	0	0	0	0	0	0	0	1	7,01	11,01	8,01	4	7,01	21,05
CAND2__chr3	0	0	0	0	0	0	0	0	1	0	0	0	0	0	0	0	0	0	0	0	0	0	0	0	0	0	0	0	0	0	0	0	0	0	0	0	0	0	0	0	0	0	0	0	0	0	0	0	0
CANT1__chr17	1	0	0	13,02	1	5	0	0	9,01	2	0	0	1	2	0	8,01	0	3	0	9,01	0	11,01	0	0	2	0	0	4	3	6	4	0	6	1	0	0	0	0	0	0	0	0	0	0	1	4	1	1	8,01
CANX__chr5	70,6	3	13,02	79,76	36,15	39,18	20,05	0	52,33	49,29	39,18	0	20,05	30,11	2	44,23	1	26,08	0	76,7	30,11	58,41	0	1	46,25	1	14,02	19,04	18,04	28,09	27,09	0	81,8	21,05	0	3	2	0	1	0	0	0	2	44,23	47,27	15,03	14,02	29,1	67,55
CAP1__chr1	32,12	0	12,02	61,45	42,21	28,09	15,03	0	34,14	40,19	15,03	0	18,04	14,02	0	37,16	0	26,08	1	49,29	31,11	45,24	0	0	39,18	0	7,01	10,01	6	22,06	29,1	0	44,23	27,09	0	0	0	0	0	1	0	0	2	24,07	15,03	26,08	23,06	13,02	54,35
CAP2__chr6	9,01	0	9,01	8,01	6	5	5	0	6	2	1	0	4	4	0	5	0	3	0	9,01	4	2	0	0	14,02	0	1	2	1	3	6	0	2	7,01	0	0	0	0	0	0	0	0	1	3	3	2	0	4	8,01
CAPG__chr2	0	0	0	0	0	0	0	0	0	0	0	0	0	0	0	0	0	0	0	0	0	0	0	0	0	0	0	0	0	0	0	0	0	0	0	0	0	0	0	0	0	0	0	0	1	0	0	0	0
CAPN10__chr2	0	0	0	1	0	0	0	0	2	1	0	0	0	0	0	0	0	0	0	0	1	0	0	0	1	0	0	0	0	0	3	0	1	0	0	0	0	0	0	0	0	0	0	0	1	0	1	0	3
CAPN14__chr2	0	0	0	0	0	0	0	0	0	0	0	0	0	0	0	0	0	0	0	0	0	0	0	0	0	0	0	0	1	0	0	0	0	0	0	0	0	0	0	0	0	0	0	0	0	0	0	0	0
CAPN1__chr11	2	0	2	9,01	9,01	6	7,01	0	7,01	11,01	10,01	0	1	6	0	10,01	0	5	0	13,02	5	2	0	0	5	0	2	0	3	8,01	2	1	9,01	1	0	0	0	0	0	0	0	0	0	6	8,01	3	0	5	10,01
CAPN2__chr1	32,12	0	24,07	61,45	35,15	23,06	17,03	0	39,18	27,09	28,09	0	14,02	24,07	0	33,13	0	22,06	0	49,29	28,09	50,3	1	0	29,1	0	6	14,02	7,01	19,04	31,11	1	57,39	23,06	0	2	2	0	0	1	2	0	0	30,11	22,06	32,12	24,07	16,03	33,13
CAPN3__chr15	0	0	0	0	0	0	0	0	0	0	0	0	0	0	0	0	0	1	0	0	1	0	0	0	0	0	0	0	0	0	0	0	0	0	0	0	0	0	0	0	0	0	0	0	1	0	0	0	0
CAPN5__chr11	0	0	0	4	3	1	0	0	5	4	0	0	1	1	0	2	0	5	0	7,01	2	6	0	0	3	0	1	0	0	3	0	0	3	2	0	0	0	0	0	0	0	0	0	2	0	3	1	0	1
CAPN7__chr3	3	0	1	2	0	1	0	0	1	0	1	0	1	3	0	3	0	1	0	0	5	2	0	0	3	0	0	0	0	3	1	0	2	0	0	0	0	0	0	1	0	0	0	3	3	1	3	0	0
CAPNS1__chr19	99,18	2	60,44	87,93	82,82	100,2	42,21	2	174,65	82,82	66,53	0	52,33	46,25	0	73,65	0	62,47	0	95,08	61,45	119,72	0	0	80,78	2	33,13	16,03	18,04	58,41	92,01	0	131,06	43,22	1	0	5	1	2	0	1	0	2	80,78	75,69	43,22	29,1	56,38	120,75
CAPNS2__chr16	0	0	0	0	0	0	0	0	0	0	1	0	0	0	0	0	0	0	0	0	0	0	0	0	0	0	0	0	0	0	0	0	0	0	0	0	0	0	0	0	0	0	0	0	0	0	0	0	0
CAPRIN1__chr11	15,03	0	3	35,15	14,02	12,02	5	0	17,03	25,07	5	0	10,01	12,02	0	24,07	0	10,01	0	15,03	18,04	35,15	0	0	27,09	0	6	14,02	6	12,02	24,07	1	22,06	10,01	1	0	0	0	0	1	0	0	1	12,02	15,03	9,01	15,03	10,01	17,03
CAPRIN2__chr12	2	0	3	7,01	4	10,01	2	0	3	11,01	6	0	0	5	0	4	0	4	0	7,01	1	4	0	0	6	0	1	0	0	5	3	0	3	4	0	0	0	0	0	0	0	0	0	7,01	10,01	4	2	7,01	10,01
CAPS2__chr12	0	0	0	1	0	1	0	0	0	0	0	0	0	0	0	0	0	1	0	0	0	0	0	0	0	0	0	0	0	0	0	0	0	0	0	0	0	0	0	0	1	0	0	1	0	0	0	0	0
CAPSL__chr5	0	0	0	0	0	0	0	0	0	0	0	0	0	0	0	0	0	0	0	0	0	0	0	0	0	0	0	0	0	0	0	0	0	0	0	0	0	0	0	0	0	0	0	0	0	0	0	0	0
CAPS__chr19	0	0	1	0	0	0	0	0	1	0	0	0	0	0	0	0	0	0	0	0	0	0	0	0	0	0	0	0	0	0	0	0	0	0	0	0	0	0	0	0	0	0	0	1	0	0	0	1	0
CAPZA1__chr1	41,2	0	15,03	43,22	14,02	20,05	8,01	0	56,38	48,28	17,03	0	17,03	12,02	1	24,07	0	18,04	0	29,1	37,16	36,15	0	0	42,21	0	8,01	22,06	11,01	7,01	36,15	0	59,42	18,04	2	0	1	2	2	1	1	0	2	20,05	22,06	21,05	16,03	26,08	35,15
CAPZA2__chr7	18,04	0	6	7,01	13,02	11,01	7,01	1	10,01	14,02	10,01	0	5	6	0	9,01	0	5	0	16,03	9,01	10,01	0	0	8,01	0	5	1	3	7,01	6	0	14,02	1	0	0	0	0	0	0	1	0	0	16,03	8,01	13,02	7,01	10,01	15,03
CAPZB__chr1	15,03	0	17,03	38,17	17,03	8,01	8,01	0	41,2	19,04	14,02	0	7,01	10,01	0	13,02	1	25,07	0	39,18	29,1	22,06	0	0	31,11	0	2	5	3	21,05	18,04	0	30,11	18,04	0	0	1	0	0	1	0	0	4	12,02	8,01	22,06	11,01	8,01	28,09
CARD10__chr22	3	0	1	2	1	3	0	0	2	0	0	0	0	0	0	3	0	0	0	5	0	1	0	0	3	1	2	0	0	0	1	0	2	1	0	0	0	0	0	0	0	0	0	2	1	1	1	1	2
CARD11__chr7	0	0	0	0	0	0	0	0	0	0	0	0	0	0	0	0	0	0	0	0	0	0	0	0	0	0	0	0	0	0	0	0	0	0	0	0	0	0	0	0	0	0	0	0	0	0	0	0	0
CARD16__chr11	0	0	0	0	0	0	0	0	0	0	0	0	0	0	0	0	0	0	0	0	0	1	0	0	0	0	0	0	0	0	0	0	0	0	0	0	0	0	0	0	0	0	0	0	0	0	0	0	0
CARD6__chr5	1	0	0	0	0	0	0	0	1	1	0	0	0	1	0	0	0	2	0	1	0	0	0	0	0	0	1	0	0	1	1	0	0	0	0	0	0	0	0	0	0	0	1	0	2	0	0	0	0
CARD8__chr19	4	0	1	1	0	2	1	0	0	0	0	0	1	0	0	0	0	0	0	1	0	1	0	0	0	0	0	0	0	1	1	0	0	0	0	0	0	0	0	0	0	0	0	0	0	0	0	0	1
CARD9__chr9	0	0	0	0	1	0	0	0	0	0	0	0	0	0	0	0	0	0	0	0	0	0	0	0	0	0	0	0	0	0	0	0	0	0	0	0	0	0	0	0	0	0	0	0	0	0	0	0	0
CARHSP1__chr16	1	0	0	4	3	1	1	0	6	4	1	0	1	1	0	0	0	3	0	2	4	6	0	0	5	0	0	1	0	3	2	0	4	2	0	0	0	0	0	0	0	0	0	2	3	3	1	1	1
CARKD__chr13	2	0	2	5	1	3	1	0	1	1	1	0	5	2	0	0	0	1	0	3	3	5	0	0	3	0	0	0	0	1	2	0	2	1	0	0	0	0	0	0	0	0	0	3	0	3	1	0	1
CARM1__chr19	7,01	0	2	20,05	4	3	2	0	7,01	5	5	0	5	3	0	3	0	5	0	3	14,02	4	0	0	7,01	0	2	3	2	3	3	0	9,01	1	0	0	0	0	0	0	0	0	0	3	7,01	3	3	3	6
CARNS1__chr11	0	0	0	0	0	0	0	0	0	0	0	0	0	0	0	0	0	0	0	0	0	0	0	0	0	0	0	0	0	0	0	0	0	0	0	0	0	0	0	0	0	0	0	0	0	0	0	0	0
CARS2__chr13	3	0	0	4	3	1	0	0	3	5	5	0	2	1	1	6	0	2	0	2	3	2	0	0	6	0	0	1	0	1	2	0	7,01	1	0	0	0	0	0	0	0	0	0	1	0	3	0	0	8,01
CARS__chr11	1	0	0	4	2	4	0	0	2	3	0	0	3	1	0	0	0	0	0	6	1	2	0	0	8,01	0	0	0	1	1	0	0	5	1	0	0	0	0	0	0	0	0	0	4	1	0	1	0	0
CASC1__chr12	0	0	0	0	0	0	0	0	0	0	0	0	0	0	0	0	0	0	0	0	0	0	0	0	0	0	0	0	0	0	0	0	0	0	0	0	0	0	0	0	0	0	0	0	0	0	0	0	0
CASC2__chr10	0	0	0	0	0	0	0	0	1	0	0	0	0	0	0	1	0	0	0	0	1	0	0	0	1	0	0	0	0	0	0	0	1	0	0	0	0	0	0	0	0	0	0	0	0	0	0	0	0
CASC3__chr17	1	0	2	3	4	4	1	0	8,01	4	2	0	1	2	0	6	0	3	0	5	7,01	3	0	0	6	0	0	1	1	1	5	0	9,01	3	1	0	0	0	0	0	0	0	0	1	2	1	3	0	2
CASC4__chr15	5	0	9,01	9,01	5	6	5	0	5	5	3	0	7,01	11,01	0	13,02	0	3	0	10,01	1	16,03	0	0	7,01	0	5	2	7,01	7,01	0	0	6	7,01	0	0	0	0	1	0	0	0	0	13,02	11,01	1	6	5	6
CASC5__chr15	4	0	0	2	0	0	0	0	3	0	0	0	1	0	0	0	0	0	0	0	0	0	0	0	5	0	0	1	0	0	0	0	2	0	0	0	0	0	0	0	0	0	0	0	0	0	0	1	2
CASD1__chr7	0	0	2	0	0	0	1	0	0	3	0	0	0	0	0	0	0	0	0	1	0	1	0	0	0	0	3	0	0	2	0	0	3	0	0	0	0	0	0	0	0	0	0	0	4	1	0	3	3
CASKIN2__chr17	0	0	0	1	0	0	0	0	1	0	0	0	1	1	0	0	0	0	0	0	0	1	0	0	1	0	0	0	0	0	0	0	0	0	0	0	0	0	0	0	0	0	0	1	1	0	0	1	0
CASK__chrX	2	0	2	3	2	1	0	0	5	4	0	0	0	1	0	3	0	0	0	1	2	2	0	0	2	0	3	1	0	2	4	0	2	1	0	1	0	0	1	0	0	0	0	0	3	0	3	0	1
CASP10__chr2	1	0	0	0	0	0	0	0	0	0	0	0	0	0	0	0	0	0	0	0	0	0	0	0	0	0	0	0	0	3	2	0	1	0	0	0	0	0	0	0	0	0	0	0	0	0	0	0	0
CASP14__chr19	0	0	0	0	0	0	0	0	0	0	0	0	0	0	0	0	0	0	0	0	0	0	0	0	0	0	0	0	0	0	0	0	0	0	0	0	0	0	0	0	0	0	0	0	0	0	0	0	0
CASP1__chr11	1	0	0	0	0	1	1	0	3	0	0	0	0	0	0	2	0	0	0	0	0	0	0	0	2	0	1	0	0	0	0	0	2	0	0	0	0	0	0	0	0	0	0	1	0	0	2	1	0
CASP2__chr7	3	0	0	6	2	1	0	0	3	6	1	0	3	0	0	2	0	2	0	3	4	1	0	0	4	0	0	1	0	0	3	0	2	1	1	0	0	0	0	0	0	0	0	2	3	2	2	0	3
CASP3__chr4	1	0	2	5	2	5	0	0	8,01	2	0	0	0	1	0	0	0	1	0	0	1	3	0	0	5	0	0	0	0	0	1	0	4	0	0	0	0	0	0	0	0	0	0	0	2	2	2	1	3
CASP4__chr11	4	0	0	2	0	0	0	0	1	0	1	0	2	3	0	1	0	1	0	1	0	1	0	0	4	0	0	1	0	1	1	0	2	1	0	0	0	0	0	0	0	0	0	3	1	1	2	1	1
CASP5__chr11	0	0	0	0	0	0	0	0	0	0	0	0	0	0	0	0	0	0	0	0	0	0	0	0	0	0	0	0	0	0	0	0	0	0	0	0	0	0	0	0	0	0	0	0	0	0	0	0	0
CASP6__chr4	3	0	0	6	2	1	2	0	8,01	1	2	0	0	0	0	6	0	0	0	3	2	10,01	0	0	4	0	1	1	0	0	0	0	3	1	0	0	0	0	0	0	0	0	0	4	1	1	1	0	3
CASP7__chr10	1	0	0	4	1	2	1	0	1	1	0	0	0	0	0	1	0	1	0	5	0	1	0	0	0	0	0	1	0	1	0	0	1	5	0	0	0	0	0	0	0	0	0	0	2	0	0	1	2
CASP8AP2__chr6	4	0	3	8,01	4	0	1	0	1	0	1	0	1	1	0	2	0	1	0	1	3	5	0	0	1	0	0	0	1	0	6	0	2	2	0	0	0	1	0	0	0	0	0	3	0	1	0	2	3
CASP8__chr2	1	0	0	0	1	0	0	0	0	0	0	0	1	1	0	0	0	0	0	1	0	0	0	0	3	0	0	1	0	0	0	0	1	0	0	0	0	0	0	0	0	0	0	1	1	0	0	0	0
CASP9__chr1	1	0	0	1	0	0	0	0	0	0	0	0	0	0	0	1	0	0	0	0	0	1	0	0	1	0	0	0	0	1	0	0	1	1	0	0	0	0	0	0	0	0	0	0	0	0	0	0	0
CASS4__chr20	0	0	0	0	0	0	0	0	0	0	0	0	0	0	0	0	0	0	0	0	0	0	0	0	0	0	0	0	0	0	0	0	0	0	0	0	0	0	0	0	0	0	0	0	0	0	0	0	0
CAST__chr5	6	0	8,01	23,06	9,01	15,03	1	0	21,05	7,01	9,01	0	7,01	5	1	7,01	0	5	0	17,03	11,01	24,07	0	0	13,02	0	2	2	0	7,01	15,03	0	15,03	9,01	1	2	0	0	0	0	0	0	0	7,01	13,02	7,01	2	6	14,02
CASZ1__chr1	0	0	0	0	0	0	0	0	0	0	0	0	0	0	0	0	0	0	0	0	0	0	0	0	0	0	0	0	0	0	0	0	0	0	0	0	0	0	0	0	0	0	0	0	0	0	0	0	0
CATSPER1__chr11	0	0	0	1	0	0	0	0	0	0	0	0	0	0	0	0	0	1	0	0	0	0	0	0	0	0	0	0	0	0	0	0	0	0	0	0	0	0	0	0	0	0	0	1	0	0	0	0	0
CATSPER2P1__chr15	0	0	0	0	0	0	0	0	0	0	0	0	0	0	0	0	0	0	0	0	0	0	0	0	0	0	0	0	0	0	0	0	0	0	0	0	0	0	0	0	0	0	0	0	0	0	0	0	0
CATSPER2__chr15	0	0	0	0	0	0	0	0	0	0	0	0	1	0	0	0	0	1	0	0	0	0	0	0	0	0	0	0	0	0	0	0	0	0	0	0	0	0	0	0	0	0	0	0	0	0	0	0	0
CATSPER3__chr5	0	0	0	0	0	0	0	0	0	0	0	0	0	0	0	0	0	0	0	0	0	0	0	0	0	0	0	0	0	0	0	0	0	0	0	0	0	0	0	0	0	0	0	0	0	0	0	0	0
CATSPERD__chr19	0	0	0	0	0	0	0	0	0	0	0	0	0	0	0	0	0	0	0	0	0	0	0	0	0	0	0	0	0	0	0	0	0	0	0	0	0	0	0	0	0	0	0	0	0	0	0	0	0
CAT__chr11	3	0	3	4	1	8,01	1	0	2	1	2	0	1	4	0	0	0	1	0	6	2	5	0	0	7,01	0	1	1	1	0	1	0	5	1	0	0	0	0	0	0	0	0	2	5	3	3	2	3	3
CAV1__chr7	188,24	1	57,39	103,28	139,33	137,26	26,08	0	221,88	112,52	99,18	1	46,25	61,45	1	78,74	1	132,09	0	271,79	122,81	63,48	0	0	143,47	0	37,16	53,34	32,12	29,1	102,25	0	156,95	65,51	2	4	4	0	2	4	1	0	3	39,18	76,7	105,33	65,51	32,12	185,1
CAV2__chr7	25,07	0	11,01	15,03	8,01	24,07	7,01	0	19,04	9,01	13,02	0	2	17,03	0	8,01	0	6	0	24,07	15,03	20,05	0	0	36,15	0	8,01	4	6	2	14,02	1	17,03	8,01	0	0	0	0	0	0	0	1	1	5	28,09	8,01	13,02	17,03	32,12
CBFA2T2__chr20	0	0	0	2	0	3	0	0	1	0	1	0	1	0	0	0	0	0	0	3	0	0	0	0	1	0	0	0	0	1	3	0	0	2	0	0	0	0	0	0	1	0	0	2	1	0	0	1	1
CBFB__chr16	15,03	0	2	24,07	13,02	5	3	0	23,06	10,01	6	0	6	9,01	0	11,01	0	4	0	11,01	19,04	33,13	0	0	14,02	0	4	7,01	1	2	13,02	0	18,04	3	0	0	0	0	1	1	0	0	1	6	3	9,01	5	4	16,03
CBLB__chr3	3	0	0	0	2	3	1	0	3	0	0	0	1	1	0	0	0	7,01	0	4	1	0	0	0	2	0	0	4	1	3	3	0	2	1	0	0	0	0	0	0	0	0	0	7,01	1	0	1	6	0
CBLL1__chr7	7,01	0	0	3	1	5	5	0	6	3	1	0	0	3	0	2	0	1	0	1	0	3	0	0	3	0	1	1	1	1	2	0	7,01	3	0	0	0	0	0	0	0	0	0	0	1	1	1	0	6
CBLN1__chr16	0	0	0	0	0	0	0	0	0	0	0	0	0	0	0	0	0	0	0	0	0	0	0	0	0	0	0	0	0	0	0	0	0	0	0	0	0	0	0	0	0	0	0	0	0	0	0	0	0
CBLN3__chr14	0	0	2	0	1	0	0	0	0	0	0	0	0	1	0	0	0	0	0	5	0	0	0	0	0	0	0	0	1	0	0	0	1	0	0	0	0	0	0	0	0	0	0	0	3	0	0	0	0
CBLN4__chr20	0	0	0	0	0	0	0	0	0	0	0	0	0	0	0	0	0	0	0	0	0	0	0	0	0	0	0	0	0	0	0	0	0	0	0	0	0	0	0	0	0	0	0	0	0	0	0	0	0
CBL__chr11	3	0	0	2	1	6	2	0	3	0	0	0	2	0	0	2	0	0	0	2	2	1	0	0	3	0	0	0	0	1	1	0	2	3	0	0	0	0	0	0	0	0	0	0	0	2	0	0	7,01
CBR1__chr21	6	0	0	12,02	4	3	3	0	10,01	6	0	0	1	5	0	6	0	6	0	9,01	4	6	0	0	3	0	1	0	0	6	7,01	0	13,02	1	0	0	0	0	0	0	0	0	0	3	4	0	5	5	9,01
CBR3-AS1__chr21	0	0	0	0	2	1	0	0	0	0	0	0	0	0	0	0	0	1	0	0	0	0	0	0	0	0	0	0	0	0	0	0	0	0	0	0	0	0	0	0	0	0	0	0	0	0	0	0	0
CBR3__chr21	0	0	0	2	1	0	0	0	4	1	0	0	0	0	0	0	0	0	0	0	2	6	0	0	0	0	0	1	0	0	2	0	6	0	0	0	0	0	0	0	0	0	0	0	0	2	1	0	1
CBR4__chr4	1	0	2	1	0	0	0	0	4	2	0	0	0	2	0	5	0	3	0	1	0	1	0	0	2	0	2	1	0	1	3	0	0	3	0	0	0	0	0	0	0	0	0	4	2	0	0	0	1
CBS__chr21	3	0	1	1	3	9,01	1	0	0	2	1	0	1	2	0	3	0	1	0	4	0	0	0	0	1	0	1	0	0	8,01	0	0	6	0	0	0	0	0	0	0	0	0	0	0	2	2	1	0	4
CBWD1__chr9	0	0	0	0	0	0	0	0	0	0	0	0	0	0	0	0	0	1	0	0	0	0	0	0	0	0	0	0	0	0	0	0	0	0	0	0	0	0	0	0	0	0	0	0	0	0	0	0	0
CBWD2__chr2	0	0	0	0	0	0	0	0	0	0	0	0	0	0	0	0	0	0	0	0	0	0	0	0	0	0	0	0	0	0	0	0	0	0	0	0	0	0	0	0	0	0	0	0	0	0	0	0	0
CBWD5__chr9	0	0	0	0	0	0	0	0	0	0	0	0	0	0	0	0	0	0	0	0	0	0	0	0	0	0	0	0	0	0	0	0	0	0	0	0	0	0	0	0	0	0	0	0	0	0	0	0	0
CBX1__chr17	10,01	0	2	17,03	4	0	2	0	12,02	14,02	4	0	9,01	1	0	6	0	2	0	7,01	6	8,01	0	0	6	0	1	6	0	2	8,01	0	15,03	8,01	0	0	0	0	0	0	0	0	0	1	1	1	5	1	9,01
CBX2__chr17	1	0	0	0	0	0	1	0	4	0	0	0	0	0	0	0	0	1	0	0	0	0	0	0	0	0	0	0	0	0	0	0	0	0	0	0	0	0	0	0	0	0	0	0	0	0	0	0	0
CBX3P2__chr18	0	0	0	0	0	0	0	0	0	0	2	0	0	0	0	0	0	0	0	0	0	0	0	0	0	0	0	0	0	0	0	0	0	0	0	0	0	0	0	0	0	0	0	0	0	0	0	0	0
CBX3__chr7	50,3	0	19,04	51,31	34,14	12,02	10,01	0	48,28	38,17	13,02	0	15,03	19,04	1	22,06	0	24,07	0	30,11	22,06	63,48	0	0	33,13	0	6	11,01	3	14,02	36,15	0	45,24	8,01	1	0	1	0	1	0	1	0	1	20,05	14,02	25,07	18,04	16,03	27,09
CBX4__chr17	4	0	1	6	3	2	1	0	4	6	0	0	1	5	0	4	0	4	0	2	2	3	0	0	7,01	0	0	1	1	2	4	0	3	2	0	0	0	1	0	0	0	0	0	3	2	0	1	4	3
CBX5__chr12	43,22	0	8,01	32,12	43,22	16,03	2	0	77,72	43,22	11,01	0	17,03	6	0	24,07	0	20,05	1	29,1	21,05	48,28	0	0	64,5	0	9,01	14,02	13,02	8,01	28,09	0	66,53	12,02	0	0	2	1	2	2	4	0	2	6	15,03	25,07	15,03	14,02	75,69
CBX6__chr22	7,01	0	1	4	2	0	2	0	4	1	1	0	0	1	0	1	0	0	0	5	3	2	0	0	7,01	0	0	0	0	0	1	0	0	0	0	0	0	0	0	0	0	0	1	1	2	2	2	0	5
CBX7__chr22	0	0	0	0	0	2	0	0	0	0	0	0	2	0	0	0	0	0	0	1	0	0	0	0	0	0	0	0	0	0	1	0	0	0	0	0	0	0	0	0	0	0	0	1	1	0	0	0	0
CBX8__chr17	0	0	0	1	0	1	1	0	0	1	0	0	1	0	0	0	0	0	0	0	0	0	0	0	1	0	0	0	0	0	0	0	0	0	0	0	0	0	0	0	0	0	0	0	0	0	1	0	0
CBY1__chr22	5	0	2	1	2	5	0	0	8,01	0	4	1	2	1	0	2	0	1	0	3	3	6	0	0	6	0	4	2	0	1	5	0	3	1	0	0	0	0	0	0	0	0	0	2	2	2	0	0	9,01
CC2D1A__chr19	1	0	1	0	1	0	0	0	2	0	2	0	0	1	0	0	0	1	0	1	1	0	0	0	1	0	0	0	1	0	0	0	1	0	0	0	0	0	0	0	1	0	0	0	0	0	0	1	0
CC2D1B__chr1	2	0	3	2	1	1	1	0	1	5	1	0	0	3	0	3	0	2	0	1	2	3	0	0	3	0	1	0	0	0	4	0	3	0	0	0	0	0	0	0	0	0	0	0	3	0	2	3	2
CC2D2A__chr4	1	0	0	4	0	3	0	0	3	1	5	0	2	3	0	0	0	0	0	0	0	0	0	0	0	0	0	0	0	0	1	0	1	0	0	0	0	0	0	0	0	0	0	1	0	0	2	0	1
CCAR1__chr10	16,03	0	8,01	20,05	8,01	29,1	6	0	16,03	25,07	18,04	0	9,01	7,01	0	9,01	3	14,02	0	27,09	12,02	23,06	0	0	23,06	0	8,01	6	7,01	16,03	11,01	0	18,04	9,01	0	0	1	1	0	2	0	0	1	7,01	13,02	14,02	16,03	25,07	9,01
CCBE1__chr18	13,02	0	1	14,02	3	5	4	0	12,02	6	3	0	1	9,01	0	4	0	1	0	5	11,01	3	0	0	14,02	0	0	5	0	1	1	0	17,03	1	0	0	0	0	0	0	0	0	1	0	0	5	0	2	26,08
CCBL1__chr9	0	0	0	2	3	2	0	0	1	0	0	0	0	0	0	1	0	1	0	3	1	0	0	0	2	0	1	0	0	0	1	0	2	0	0	0	0	0	0	0	0	0	0	0	1	0	0	0	0
CCBL2__chr1	3	0	6	0	5	1	4	0	4	0	0	0	0	1	0	1	0	1	0	2	0	1	0	0	3	0	0	0	1	1	4	0	1	0	0	0	0	0	0	0	0	0	0	1	5	1	2	0	0
CCBP2__chr3	0	0	0	0	0	0	0	0	0	0	0	0	0	0	0	0	0	0	0	0	0	0	0	0	0	0	0	0	0	0	0	0	0	0	0	0	0	0	0	0	0	0	0	0	0	0	0	0	0
[truncated: 13,680 more rows]
[truncated: 335 more columns]
