# Supplementary material for: Time-resolved single-cell sequencing identifies multiple waves of mRNA decay during the mitosis-to-G1 phase transition
Source: eLife. 2022 Feb 1;11:e71356. doi: 10.7554/eLife.71356 (PMC8806192; doi:10.7554/eLife.71356)
Supplement: Source data 4. [file elife-71356-data4.xlsx]

## Sheet: Blad1
Cell_Id	1	2	3	4	5	6	7	8	9	10	11	12	13	14	15	16	17	18	19	20	21	22	23	24	25	26	27	28	29	30	31	32	33	34	35	36	37	38	39	40	41	42	43	44	45	46	47	48	49
Plate_Id	plate_1	plate_1	plate_1	plate_1	plate_1	plate_1	plate_1	plate_1	plate_1	plate_1	plate_1	plate_1	plate_1	plate_1	plate_1	plate_1	plate_1	plate_1	plate_1	plate_1	plate_1	plate_1	plate_1	plate_1	plate_1	plate_1	plate_1	plate_1	plate_1	plate_1	plate_1	plate_1	plate_1	plate_1	plate_1	plate_1	plate_1	plate_1	plate_1	plate_1	plate_1	plate_1	plate_1	plate_1	plate_1	plate_1	plate_1	plate_1	plate_1
Well_Id	68	56	175	53	130	58	54	66	153	63	39	61	52	285	106	369	368	31	32	59	44	233	84	62	132	365	35	320	33	200	291	371	57	71	279	40	213	202	77	51	281	42	89	224	276	207	367	376	176
Fucci_g1	74	49	955	3	987	85	108	-5	255	6	82	77	-93	1964	983	6285	6913	97	75	69	56	3794	591	115	916	2955	73	6371	85	1040	1474	3807	79	63	2198	110	2245	719	965	-12	2336	55	904	5220	1238	1917	5486	4903	1059
Fucci_g2	23403	23709	74	20775	146	18112	14445	13708	121	18422	15437	12432	26267	89	91	89	118	13818	16413	16645	17091	96	48	13621	48	86	18638	116	19054	94	106	129	12741	20733	54	15785	104	25	41	21208	62	23154	112	88	59	60	111	81	82
Cell cycle phase	G2/M	G2/M	G1	G2/M	G1	G2/M	G2/M	G2/M	G1	G2/M	G2/M	G2/M	G2/M	G1	G1	G1	G1	G2/M	G2/M	G2/M	G2/M	G1	G1	G2/M	G1	G1	G2/M	G1	G2/M	G1	G1	G1	G2/M	G2/M	G1	G2/M	G1	G1	G1	G2/M	G1	G2/M	G1	G1	G1	G1	G1	G1	G1
Cell cycle time	0	0	56.5511	0	57.7934	0	0	0	23.5545	0	0	0	0	90.4634	57.6389	190.175	202.215	0	0	0	0	137.783	41.1217	0	55.0158	117.51	0	191.844	0	59.8184	75.1394	138.083	0	0	97.2501	0	98.5789	46.8578	56.941	0	101.122	0	54.5386	168.845	67.0616	89.0634	174.295	162.226	60.5348
[truncated: 792 more columns]
