# Supplementary material for: Time-resolved single-cell sequencing identifies multiple waves of mRNA decay during the mitosis-to-G1 phase transition
Source: eLife. 2022 Feb 1;11:e71356. doi: 10.7554/eLife.71356 (PMC8806192; doi:10.7554/eLife.71356)
Supplement: Supplementary file 1. — This file contains analyses that were used throughout the study, in Figure 1D–E, Figure 1—figure supplement 1J,L,N, Figures 2A–B–3C and Figure 3—figure supplement 1B-G. [file elife-71356-supp1.xlsx]

## Sheet: Fig. 1D
	Fig. 1D: Polynomial fit of FUCCI-G1 fluorescence intensities during the first 10 hours of G1 phase
	Fit: y = p1*x^3 + p2*x^2 + p3*x + p4
	p1	p2	p3	p4
	-4.0562e-09	4.0124e-06	0.00025118	-0.0015
		mKO2 fluorescence relative to early-S phase
	Time after metaphase (min)	Data Mean	Data SEM*	Data Std*	Polynomial Fit	Std FUCCI G1 timing		*In figure 1D the SEM of the three experiments is plotted, the Std is used to compute the variability in cell timing (Fig. S1C).
	0	0	0	0.013372	-0.00145483	34.6887
	5	0.000388039	0.0004	0.0110789	-9.91091e-05	27.8443
	10	0.00219449	0.001	0.0156051	0.00145419	34.0682
	15	0.00329972	0.001	0.0157904	0.00320202	32.331
	20	0.00817428	0.0016	0.0190807	0.00514134	35.607
	25	0.00925399	0.004	0.017377	0.00726911	31.2477
	30	0.0111031	0.0034	0.0163453	0.00958229	28.1591
	35	0.012966	0.0029	0.018899	0.0120778	30.3688
	40	0.0137466	0.0027	0.0184212	0.0147527	28.3646
	45	0.0150282	0.0032	0.0170472	0.0176038	31.574
	50	0.0163939	0.0036	0.0171689	0.0206282	29.3694
	55	0.0187333	0.0055	0.0181043	0.0238228	29.1062
	60	0.0214204	0.0079	0.0201163	0.0271845	30.7613
	65	0.0239042	0.0081	0.0217278	0.0307104	31.6194
	70	0.0285441	0.0102	0.0238508	0.0343973	33.2131
	75	0.0320402	0.0102	0.0241366	0.0382422	31.9986
	80	0.0375864	0.0112	0.0256306	0.0422422	32.6134
	85	0.0428781	0.0114	0.0270782	0.046394	33.1453
	90	0.0479566	0.0129	0.0302766	0.0506948	35.8959
	95	0.0530233	0.0133	0.0300587	0.0551414	34.2767
	100	0.0591142	0.0146	0.0326684	0.0597309	36.1413
	105	0.0635555	0.0149	0.0322143	0.0644601	34.4273
	110	0.0693167	0.0163	0.0354379	0.069326	36.8877
	115	0.0746216	0.0157	0.0353604	0.0743257	35.7114
	120	0.0808007	0.0185	0.0394187	0.079456	38.9094
	125	0.0853308	0.0179	0.0406581	0.0847139	39.1154
	130	0.0943535	0.0211	0.0489659	0.0900963	46.3908
	135	0.101598	0.0215	0.0481535	0.0956003	44.4237
	140	0.108631	0.0238	0.056333	0.101223	51.2366
	145	0.112024	0.0263	0.0528824	0.106961	46.795
	150	0.118737	0.0297	0.0571342	0.112811	49.6769
	155	0.123242	0.0289	0.0579044	0.118771	49.3378
	160	0.12786	0.0289	0.0553615	0.124837	46.1522
	165	0.135773	0.0299	0.0592308	0.131006	48.6109
	170	0.143467	0.0304	0.0627105	0.137275	50.686
	175	0.149831	0.0301	0.0646225	0.143642	51.4164
	180	0.15722	0.0312	0.0689004	0.150103	54.0886
	185	0.164103	0.032	0.0716476	0.156655	55.4719
	190	0.168378	0.0343	0.0748869	0.163295	57.2362
	195	0.176092	0.0355	0.08003	0.170019	60.4879
	200	0.179752	0.0357	0.0757242	0.176826	56.3256
	205	0.188192	0.035	0.0762107	0.183712	55.9867
	210	0.197273	0.038	0.079974	0.190674	58.1524
	215	0.198664	0.0336	0.0754309	0.197709	54.1227
	220	0.205719	0.0334	0.0747312	0.204813	53.0407
	225	0.212103	0.0344	0.0746211	0.211984	52.435
	230	0.219949	0.0358	0.0791164	0.219219	55.1572
	235	0.227142	0.0359	0.0824853	0.226515	57.0594
	240	0.238322	0.0412	0.0873387	0.233868	60.0061
	245	0.245451	0.0424	0.0920032	0.241276	62.8061
	250	0.254274	0.0427	0.093593	0.248735	63.4459
	255	0.26335	0.0444	0.0972461	0.256243	65.5379
	260	0.264257	0.0402	0.0899625	0.263796	60.1047
	265	0.273683	0.0388	0.0873073	0.271392	57.9453
	270	0.273634	0.0391	0.0866735	0.279027	57.2051
	275	0.28332	0.0406	0.0872992	0.286699	57.3426
	280	0.288173	0.0425	0.0902445	0.294403	59.0523
	285	0.296087	0.0452	0.0945377	0.302138	61.6733
	290	0.302219	0.0444	0.0936329	0.309901	60.8485
	295	0.312007	0.0528	0.11335	0.317687	73.7917
	300	0.330148	0.0585	0.128666	0.325495	83.899
	305	0.335045	0.0516	0.113798	0.33332	73.7016
	310	0.346922	0.0525	0.116051	0.341161	75.0586
	315	0.345599	0.0497	0.116075	0.349014	74.9597
	320	0.351944	0.0571	0.123306	0.356875	79.6993
	325	0.357209	0.0558	0.119778	0.364743	77.2939
	330	0.364566	0.0571	0.119799	0.372613	77.2926
	335	0.365946	0.0551	0.11567	0.380484	74.5654
	340	0.376486	0.06	0.124734	0.388351	80.6626
	345	0.38804	0.0631	0.135281	0.396211	87.8647
	350	0.395476	0.0626	0.12581	0.404063	81.6097
	355	0.401771	0.0598	0.120654	0.411902	78.3093
	360	0.413792	0.0652	0.138199	0.419726	90.4273
	365	0.415792	0.0626	0.13099	0.427531	85.7653
	370	0.422151	0.0639	0.137279	0.435315	90.4045
	375	0.431918	0.0666	0.140923	0.443075	93.3198
	380	0.438101	0.0708	0.147633	0.450807	98.5042
	385	0.445742	0.0705	0.148369	0.458508	99.5645
	390	0.461366	0.067	0.151814	0.466176	102.665
	395	0.47104	0.0725	0.158699	0.473807	108.456
	400	0.477133	0.0768	0.166342	0.481398	115.109
	405	0.490475	0.0761	0.171291	0.488947	120.011
	410	0.492071	0.0727	0.156854	0.49645	109.781
	415	0.51024	0.0798	0.171168	0.503903	122.427
	420	0.510757	0.0815	0.169108	0.511305	122.159
	425	0.505895	0.0724	0.15304	0.518653	110.267
	430	0.511463	0.0688	0.152938	0.525942	111.567
	435	0.523483	0.0772	0.158458	0.53317	117.898
	440	0.53202	0.0789	0.179428	0.540334	140.349
	445	0.534332	0.0693	0.16924	0.547431	132.582
	450	0.549308	0.0791	0.187391	0.554458	159.925
	455	0.563741	0.0817	0.184674	0.561412	163.936
	460	0.566644	0.0766	0.168049	0.568289	142.594
	465	0.582074	0.0733	0.16981	0.575087	152.583
	470	0.595243	0.0783	0.208632	0.581803	139.646
	475	0.617398	0.0896	0.198629	0.588434	134.075
	480	0.619045	0.0939	0.211004	0.594976	142.783
	485	0.619238	0.0912	0.203123	0.601427	138.668
	490	0.621429	0.0896	0.212241	0.607783	145.426
	495	0.628077	0.0955	0.227611	0.614042	156.22
	500	0.626857	0.0939	0.222588	0.6202	154.109
	505	0.636222	0.0915	0.214472	0.626255	150.076
	510	0.655747	0.0968	0.235146	0.632203	164.462
	515	0.663306	0.0909	0.237853	0.638041	167.469
	520	0.660337	0.1007	0.237429	0.643767	168.55
	525	0.674156	0.0839	0.192509	0.649376	141.067
	530	0.670139	0.0772	0.182538	0.654867	135.97
	535	0.694799	0.0775	0.190375	0.660236	142.588
	540	0.693116	0.0953	0.249747	0.665481	182.553
	545	0.686231	0.0827	0.2095	0.670597	158.314
	550	0.671137	0.0634	0.168014	0.675582	132.529
	555	0.691242	0.0762	0.169625	0.680434	135.337
	560	0.682104	0.0817	0.181213	0.685148	144.978
	565	0.69183	0.0732	0.181698	0.689722	147.221
	570	0.66984	0.0497	0.134519	0.694153	116.283
	575	0.700916	0.0662	0.1633	0.698438	138.631
	580	0.702929	0.0605	0.139211	0.702574	123.587
	585	0.726228	0.0663	0.162752	0.706557	142.561
	590	0.705225	0.0597	0.180496	0.710385	157.275
	595	0.687829	0.0849	0.166289	0.714055	149.763
	600	0.711139	0.0985	0.173912	0.717563	157.669
	605	0.690531	0.103	0.178547	0.720907
	610	0.678648	0.0915	0.167704	0.724083
	615	0.643486	0.1053	0.234412	0.727089
	620	0.740996	0.0652	0.11928	0.729921
	625	0.711399	0.0672	0.119742	0.732577
	630	0.721652	0.0449	0.0956074	0.735053
	635	0.742753	0.0677	0.141613	0.737346
	640	0.753687	0.0728	0.1343	0.739454
	645	0.751592	0.0775	0.128195	0.741372
	650	0.746022	0.0794	0.136281	0.743099
	655	0.747067	0.0892	0.131096	0.744631
	660	0.734658	0.1075	0.179619	0.745966
	665	0.723083	0.1042	0.176866	0.747099
	670	0.749842	0.1099	0.18177	0.748028
	675	0.748982	0.169	0.172694	0.74875
	680	0.724376	0.1747	0.192767	0.749263
	685	0.714406	0.2255	0.229364	0.749562
	690	0.783967	0.1685	0.171672	0.749644
	695	0.788521	0.1326	0.147011	0.749508
	700	0.79009	0.1341	0.164807	0.74915

## Sheet: Fig. S1J
	Supplemental Fig. 1J: FUCCI G1 fluorescence intensities measured by FACS during sorting of G1 cells, and the assigned G1 cell cycle times using the polynomial fit of Fig. 1B.
	Replicate Experiment 1				Replicate Experiment 2				Replicate Experiment 3
	Average S-phase FUCCI G1 value:		38433.8		Average S-phase FUCCI G1 value:		28473.1		Average S-phase FUCCI G1 value:		4424
	FUCCI G1 value	Normalized FUCCI G1 value	Time since metaphase (min)		FUCCI G1 value	Normalized FUCCI G1 value	Time since metaphase (min)		FUCCI G1 value	Normalized FUCCI G1 value	Time since metaphase (min)
	255	0.00663479	23.5545		145	0.00509253	19.8799		54	0.0122061	35.2477
	312	0.00811786	26.8813		176	0.00618128	22.4986		58	0.0131103	36.9697
	392	0.0101994	31.2707		194	0.00681345	23.9653		70	0.0158228	41.9128
	410	0.0106677	32.2194		199	0.00698906	24.3662		74	0.0167269	43.4944
	418	0.0108758	32.6369		263	0.00923679	29.2777		76	0.017179	44.274
	425	0.011058	33.0001		281	0.00986897	30.5934		88	0.0198915	48.8078
	444	0.0115523	33.9766		391	0.0137323	38.1314		95	0.0214738	51.3495
	456	0.0118646	34.5864		414	0.01454	39.6143		110	0.0248644	56.5758
	457	0.0118906	34.637		460	0.0161556	42.4986		115	0.0259946	58.2581
	484	0.0125931	35.9896		498	0.0174902	44.8064		117	0.0264467	58.9233
	509	0.0132436	37.2201		514	0.0180521	45.7595		129	0.0291591	62.8285
	511	0.0132956	37.3176		538	0.018895	47.1695		144	0.0325497	67.5215
	528	0.0137379	38.1419		539	0.0189302	47.2278		152	0.034358	69.9479
	538	0.0139981	38.6226		541	0.0190004	47.3442		164	0.0370705	73.4977
	539	0.0140241	38.6705		550	0.0193165	47.8661		165	0.0372966	73.7889
	562	0.0146225	39.7642		566	0.0198784	48.7865		169	0.0382007	74.9471
	566	0.0147266	39.9528		566	0.0198784	48.7865		169	0.0382007	74.9471
	567	0.0147526	39.9999		590	0.0207213	50.1496		175	0.039557	76.6648
	579	0.0150649	40.5628		596	0.020932	50.4872		186	0.0420434	79.756
	583	0.0151689	40.7495		601	0.0211077	50.7676		191	0.0431736	81.1377
	590	0.0153511	41.0753		601	0.0211077	50.7676		193	0.0436257	81.6864
	591	0.0153771	41.1217		615	0.0215993	51.5482		195	0.0440778	82.233
	599	0.0155852	41.4921		618	0.0217047	51.7146		216	0.0488246	87.8467
	603	0.0156893	41.6767		622	0.0218452	51.9361		217	0.0490506	88.1087
	613	0.0159495	42.1363		626	0.0219857	52.157		227	0.051311	90.7027
	622	0.0161837	42.5478		627	0.0220208	52.2122		232	0.0524412	91.9832
	626	0.0162877	42.73		632	0.0221964	52.4874		247	0.0558318	95.7621
	630	0.0163918	42.9118		638	0.0224071	52.8167		251	0.056736	96.7548
	638	0.0166	43.2741		641	0.0225125	52.9809		252	0.056962	97.002
	643	0.0167301	43.4998		662	0.02325	54.1226		252	0.056962	97.002
	645	0.0167821	43.5899		679	0.0238471	55.037		261	0.0589964	99.21
	646	0.0168081	43.6349		681	0.0239173	55.144		262	0.0592224	99.4535
	648	0.0168602	43.7249		684	0.0240227	55.3044		264	0.0596745	99.9395
	651	0.0169382	43.8597		685	0.0240578	55.3577		277	0.062613	103.064
	655	0.0170423	44.039		708	0.0248656	56.5776		298	0.0673599	107.996
	656	0.0170683	44.0838		709	0.0249007	56.6303		316	0.0714286	112.119
	689	0.0179269	45.548		738	0.0259192	58.1468		318	0.0718807	112.571
	694	0.018057	45.7677		738	0.0259192	58.1468		325	0.0734629	114.147
	701	0.0182392	46.0743		740	0.0259895	58.2505		336	0.0759494	116.596
	701	0.0182392	46.0743		747	0.0262353	58.6128		341	0.0770796	117.7
	704	0.0183172	46.2054		754	0.0264811	58.9739		344	0.0777577	118.359
	705	0.0183432	46.249		775	0.0272187	60.0496		358	0.0809222	121.406
	707	0.0183953	46.3363		781	0.0274294	60.3549		362	0.0818264	122.269
	708	0.0184213	46.3798		785	0.0275699	60.5579		365	0.0825045	122.914
	714	0.0185774	46.6409		814	0.0285884	62.0186		368	0.0831826	123.556
	716	0.0186294	46.7277		819	0.028764	62.2684		380	0.0858951	126.107
	717	0.0186555	46.7711		820	0.0287991	62.3183		388	0.0877034	127.791
	719	0.0187075	46.8578		821	0.0288342	62.3682		398	0.0899638	129.878
	741	0.0192799	47.8059		821	0.0288342	62.3682		410	0.0926763	132.357
	762	0.0198263	48.7015		828	0.0290801	62.7167		410	0.0926763	132.357
	765	0.0199044	48.8287		841	0.0295367	63.3609		432	0.0976492	136.834
	774	0.0201385	49.2093		846	0.0297123	63.6077		458	0.103526	142.019
	775	0.0201645	49.2515		867	0.0304498	64.6382		475	0.107369	145.352
	776	0.0201906	49.2936		867	0.0304498	64.6382		500	0.11302	150.177
	781	0.0203207	49.5042		872	0.0306254	64.8822		501	0.113246	150.368
	797	0.020737	50.1747		885	0.031082	65.514		501	0.113246	150.368
	820	0.0213354	51.13		899	0.0315737	66.1904		503	0.113698	150.75
	832	0.0216476	51.6245		923	0.0324166	67.3408		509	0.115054	151.893
	837	0.0217777	51.8298		947	0.0332595	68.4798		512	0.115732	152.462
	840	0.0218558	51.9527		950	0.0333648	68.6214		520	0.117541	153.975
	840	0.0218558	51.9527		961	0.0337512	69.1392		522	0.117993	154.352
	851	0.022142	52.4022		963	0.0338214	69.233		531	0.120027	156.043
	858	0.0223241	52.6871		975	0.0342429	69.7948		549	0.124096	159.394
	861	0.0224022	52.809		985	0.0345941	70.261		555	0.125452	160.503
	867	0.0225583	53.0522		996	0.0349804	70.7716		561	0.126808	161.607
	869	0.0226103	53.1331		1041	0.0365608	72.8385		564	0.127486	162.158
	871	0.0226623	53.214		1047	0.0367716	73.1114		565	0.127712	162.341
	874	0.0227404	53.3352		1087	0.0381764	74.9161		578	0.130651	164.715
	901	0.0234429	54.4189		1091	0.0383169	75.0951		579	0.130877	164.896
	903	0.0234949	54.4987		1105	0.0388086	75.7198		584	0.132007	165.804
	904	0.023521	54.5386		1107	0.0388788	75.8088		586	0.132459	166.166
	905	0.023547	54.5785		1138	0.0399676	77.1803		592	0.133816	167.251
	905	0.023547	54.5785		1147	0.0402837	77.5758		593	0.134042	167.431
	907	0.023599	54.6581		1152	0.0404593	77.795		595	0.134494	167.791
	908	0.023625	54.698		1156	0.0405997	77.9701		595	0.134494	167.791
	916	0.0238332	55.0158		1178	0.0413724	78.9289		639	0.144439	175.621
	917	0.0238592	55.0555		1185	0.0416183	79.2325		668	0.150995	180.685
	918	0.0238852	55.0952		1222	0.0429177	80.8261		678	0.153255	182.414
	919	0.0239112	55.1348		1240	0.0435499	81.5946		679	0.153481	182.587
	919	0.0239112	55.1348		1251	0.0439362	82.0621		744	0.168174	193.634
	923	0.0240153	55.2932		1273	0.0447089	82.9924		780	0.176311	199.623
	930	0.0241975	55.5697		1274	0.044744	83.0345		781	0.176537	199.789
	932	0.0242495	55.6486		1278	0.0448845	83.2029		789	0.178345	201.108
	936	0.0243536	55.8061		1287	0.0452006	83.5811		797	0.180154	202.423
	938	0.0244056	55.8848		1296	0.0455167	83.9583		799	0.180606	202.751
	940	0.0244576	55.9634		1318	0.0462893	84.8761		818	0.184901	205.857
	940	0.0244576	55.9634		1443	0.0506794	86.2005		841	0.190099	209.589
	951	0.0247438	56.3947		1473	0.0517331	89.9824		844	0.190778	210.074
	952	0.0247699	56.4338		1477	0.0518736	91.1822		855	0.193264	211.847
	955	0.0248479	56.5511		1508	0.0529623	91.3414		881	0.199141	216.012
	965	0.0251081	56.941		1537	0.0539808	92.2143		882	0.199367	216.172
	965	0.0251081	56.941		1699	0.0596704	92.57		902	0.203888	219.352
	972	0.0252902	57.213		1744	0.0612508	93.3574		908	0.205244	220.302
	973	0.0253163	57.2518		1784	0.0626557	93.7104		922	0.208409	222.513
	976	0.0253943	57.3681		1350	0.0474132	94.8816		930	0.210217	223.772
	979	0.0254724	57.4843		1499	0.0526462	96.3141		932	0.210669	224.086
	981	0.0255244	57.5616		1528	0.0536647	98.2299		933	0.210895	224.244
	981	0.0255244	57.5616		1567	0.0550344	98.7623		935	0.211347	224.558
	983	0.0255764	57.6389		1604	0.0563339	99.8597		943	0.213156	225.812
	986	0.0256545	57.7548		1654	0.0580899	99.9351		958	0.216546	228.158
	987	0.0256805	57.7934		1668	0.0585816	101.623		976	0.220615	230.96
	992	0.0258106	57.9862		1697	0.0596001	102.033		986	0.222875	232.511
	992	0.0258106	57.9862		1755	0.0616372	103.072		989	0.223553	232.975
	996	0.0259147	58.1401		1783	0.0626205	103.109		1009	0.228074	236.064
	998	0.0259667	58.217		1788	0.0627961	103.257		1024	0.231465	238.37
	1007	0.0262009	58.5622		1820	0.06392	104.436		1096	0.24774	249.335
	1009	0.0262529	58.6388		1831	0.0643063	104.84		1099	0.248418	249.788
	1013	0.026357	58.7917		1865	0.0655005	106.081		1121	0.253391	253.104
	1015	0.026409	58.8681		1882	0.0660975	106.698		1122	0.253617	253.255
	1020	0.0265391	59.0589		1889	0.0663434	106.952		1130	0.255425	254.457
	1024	0.0266432	59.2112		1961	0.0688721	109.539		1131	0.255651	254.607
	1029	0.0267733	59.4013		1985	0.069715	110.394		1133	0.256103	254.907
	1032	0.0268514	59.5152		2013	0.0706983	111.386		1156	0.261302	258.352
	1034	0.0269034	59.5911		2020	0.0709442	111.633		1160	0.262206	258.95
	1039	0.0270335	59.7805		2023	0.0710496	111.739		1167	0.263788	259.995
	1040	0.0270595	59.8184		2070	0.0727002	113.389		1177	0.266049	261.486
	1042	0.0271116	59.894		2071	0.0727354	113.424		1196	0.270344	264.311
	1043	0.0271376	59.9318		2087	0.0732973	113.982		1216	0.274864	267.277
	1048	0.0272677	60.1206		2106	0.0739646	114.643		1220	0.275769	267.869
	1056	0.0274758	60.422		2133	0.0749129	115.579		1230	0.278029	269.348
	1059	0.0275539	60.5348		2144	0.0752992	115.959		1231	0.278255	269.495
	1061	0.0276059	60.6099		2155	0.0756855	116.338		1232	0.278481	269.643
	1062	0.0276319	60.6475		2159	0.075826	116.475		1258	0.284358	273.477
	4459	0.116018	61.0596		2187	0.0768094	117.436		1263	0.285488	274.213
	1073	0.0279181	61.5819		2188	0.0768445	117.471		1264	0.285714	274.36
	1087	0.0282824	62.8029		2253	0.0791274	119.683		1271	0.287297	275.389
	1120	0.029141	63.39		2314	0.0812697	121.738		1275	0.288201	275.976
	1136	0.0295573	63.4266		2315	0.0813049	121.772		1282	0.289783	277.004
	1137	0.0295833	65.6719		2320	0.0814805	121.939		1297	0.293174	279.203
	1199	0.0311965	66.137		2337	0.0820775	122.508		1305	0.294982	280.375
	1212	0.0315347	66.2441		2343	0.0822882	122.708		1317	0.297694	282.13
	1215	0.0316128	66.6358		2358	0.0828151	123.208		1327	0.299955	283.59
	1226	0.031899	67.0616		2388	0.0838687	124.204		1347	0.304476	286.507
	1238	0.0322112	67.1678		2394	0.0840794	124.403		1368	0.309222	289.564
	1241	0.0322893	67.8382		2425	0.0851682	125.426		1375	0.310805	290.581
	1260	0.0327836	68.7144		2459	0.0863623	126.543		1388	0.313743	292.469
	1285	0.0334341	69.376		2499	0.0877671	127.85		1405	0.317586	294.935
	1304	0.0339285	69.8265		2501	0.0878373	127.915		1417	0.320298	296.674
	1317	0.0342667	71.4414		2529	0.0888207	128.825		1421	0.321203	297.253
	1364	0.0354896	71.8162		2535	0.0890315	129.02		1426	0.322333	297.977
	1375	0.0357758	72.0881		2544	0.0893475	129.311		1431	0.323463	298.7
	1383	0.035984	72.2577		2547	0.0894529	129.408		1440	0.325497	300.002
	1388	0.036114	72.3594		2558	0.0898392	129.764		1444	0.326401	300.58
	1391	0.0361921	72.4271		2569	0.0902256	130.119		1459	0.329792	302.747
	1393	0.0362441	72.5286		2608	0.0915953	131.373		1473	0.332957	304.768
	1396	0.0363222	72.5962		2674	0.0939133	133.479		1475	0.333409	305.056
	1398	0.0363742	73.3714		2715	0.0953532	134.778		1491	0.337025	307.364
	1421	0.0369727	74.0749		2717	0.0954235	134.841		1504	0.339964	309.237
	1442	0.0375191	74.3752		2749	0.0965473	135.85		1527	0.345163	312.549
	1451	0.0377532	74.7413		2750	0.0965824	135.881		1529	0.345615	312.837
	1462	0.0380394	75.1394		2846	0.099954	138.881		1553	0.35104	316.289
	1474	0.0383517	76.4904		2889	0.101464	140.212		1560	0.352622	317.296
	1515	0.0394184	76.7196		2892	0.10157	140.305		1571	0.355108	318.877
	1522	0.0396006	77.2421		2908	0.102132	140.799		1578	0.356691	319.883
	1538	0.0400169	77.4049		2920	0.102553	141.168		1580	0.357143	320.17
	1543	0.040147	78.313		2928	0.102834	141.414		1595	0.360533	322.325
	1571	0.0408755	78.6681		3019	0.10603	144.196		1612	0.364376	324.767
	1582	0.0411617	79.0222		3041	0.106803	144.864		1613	0.364602	324.911
	1593	0.0414479	79.1829		3047	0.107013	145.045		1635	0.369575	328.07
	1598	0.041578	80.5883		3050	0.107119	145.136		1641	0.370931	328.932
	1642	0.0427228	81.1274		3078	0.108102	145.983		1676	0.378843	333.957
	1659	0.0431651	81.6328		3088	0.108453	146.285		1702	0.38472	337.692
	1675	0.0435814	82.5129		3099	0.10884	146.616		1717	0.38811	339.847
	1703	0.04431	83.6362		3134	0.110069	147.668		1734	0.391953	342.291
	1739	0.0452466	85.0585		3181	0.11172	149.074		1735	0.392179	342.434
	1785	0.0464435	85.0893		3192	0.112106	149.402		1765	0.39896	346.75
	1786	0.0464695	85.7337		3211	0.112773	149.968		1765	0.39896	346.75
	1807	0.0470159	85.795		3212	0.112808	149.998		1768	0.399638	347.181
	1809	0.0470679	85.9479		3244	0.113932	150.948		1787	0.403933	349.917
	1814	0.047198	86.1007		3254	0.114283	151.244		1793	0.405289	350.782
	1819	0.0473281	86.6494		3267	0.11474	151.628		1799	0.406646	351.646
	1837	0.0477965	87.0444		3353	0.11776	153.249		1802	0.407324	352.079
	1850	0.0481347	87.7104		3379	0.118673	153.66		1832	0.414105	356.407
	1872	0.0487071	87.8614		3384	0.118849	154.159		1848	0.417722	358.718
	1877	0.0488372	88.4035		3424	0.120254	154.919		1859	0.420208	360.308
	1895	0.0493056	89.0634		3474	0.12201	155.065		1871	0.42292	362.045
	1917	0.049878	90.4634		3506	0.123134	155.619		1876	0.424051	362.769
	1964	0.0511009	90.4931		3540	0.124328	156.231		1883	0.425633	363.783
	1965	0.0511269	90.5227		3674	0.129034	157.681		1908	0.431284	367.409
	1966	0.0511529	91.1734		3322	0.116672	157.97		1908	0.431284	367.409
	1988	0.0517253	91.4093		3336	0.117163	158.605		1956	0.442134	374.393
	1996	0.0519335	93.2544		3403	0.119516	159.095		1961	0.443264	375.122
	2059	0.0535726	93.3126		3484	0.122361	159.584		1966	0.444394	375.852
	2061	0.0536247	93.3999		3523	0.123731	161.589		1969	0.445072	376.29
	2064	0.0537027	95.8243		3610	0.126786	162.046		1973	0.445976	376.874
	2148	0.0558883	96.0247		3626	0.127348	163.411		1981	0.447785	378.044
	2155	0.0560704	96.1962		3704	0.130088	164.261		1986	0.448915	378.775
	2161	0.0562266	97.2501		3815	0.133986	167.387		1991	0.450045	379.507
	2198	0.0571892	98.1842		4098	0.143925	175.221		1994	0.450723	379.946
	2231	0.0580479	98.5789		4126	0.144909	175.986		2007	0.453662	381.851
	2245	0.0584121	98.6071		4159	0.146068	176.886		2024	0.457505	384.347
	2246	0.0584382	98.7759		4180	0.146805	177.457		2032	0.459313	385.524
	2252	0.0585943	98.8322		4355	0.152951	182.182		2034	0.459765	385.818
	2254	0.0586463	99.1973		4456	0.156499	184.882		2040	0.461121	386.701
	2267	0.0589845	99.3935		4504	0.158184	186.158		2048	0.462929	387.88
	2274	0.0591667	99.5336		4572	0.160573	187.958		2057	0.464964	389.208
	2279	0.0592968	99.8971		4667	0.163909	190.46		2064	0.466546	390.242
	2292	0.059635	100.371		4692	0.164787	191.115		2065	0.466772	390.39
	2309	0.0600773	101.122		4709	0.165384	191.56		2074	0.468807	391.721
	2336	0.0607798	101.316		4876	0.171249	195.908		2079	0.469937	392.461
	2346	0.06104	101.399		4928	0.173076	197.252		2086	0.471519	393.498
	2346	0.06104	101.399		5076	0.178274	201.056		2088	0.471971	393.795
	2379	0.0618986	102.31		5192	0.182348	204.014		2095	0.473553	394.833
	2390	0.0621849	102.613		5233	0.183788	205.054		2102	0.475136	395.873
	2401	0.0624711	102.915		5277	0.185333	206.169		2102	0.475136	395.873
	2343	0.060962	104.363		5301	0.186176	206.775		2102	0.475136	395.873
	2454	0.0638501	105.475		5343	0.187651	207.835		2124	0.480108	399.149
	2495	0.0649168	106.312		5772	0.202718	218.53		2136	0.482821	400.94
	2526	0.0657234	107.358		6011	0.211112	224.394		2165	0.489376	405.285
	2565	0.0667381	110.225		6023	0.211533	224.687		2166	0.489602	405.436
	2673	0.0695482	111.72		6030	0.211779	224.858		2184	0.493671	408.145
	2730	0.0710312	115.164		6064	0.212973	225.686		2188	0.494575	408.748
	2863	0.0744917	115.702		6269	0.220173	230.656		2197	0.496609	410.107
	2884	0.0750381	116.315		6305	0.221437	231.524		2198	0.496835	410.258
	2908	0.0756626	116.697		6814	0.239314	243.679		2202	0.49774	410.863
	2923	0.0760529	117.003		7055	0.247778	249.36		2203	0.497966	411.014
	2935	0.0763651	117.409		7142	0.250833	251.401		2206	0.498644	411.468
	2951	0.0767814	117.51		7253	0.254732	253.996		2250	0.50859	418.161
	2955	0.0768855	118.421		7347	0.258033	256.188		2278	0.514919	422.454
	2991	0.0778221	119.504		7425	0.260773	258.002		2278	0.514919	422.454
	3034	0.0789409	123.777		7667	0.269272	263.607		2280	0.515371	422.762
	3206	0.0834162	123.949		7786	0.273451	266.351		2291	0.517857	424.457
	3213	0.0835983	126.295		7804	0.274083	266.765		2316	0.523508	428.326
	3309	0.0860961	128.279		7909	0.277771	269.179		2320	0.524412	428.947
	3391	0.0882296	133.139		7990	0.280616	271.037		2435	0.550407	447.111
	3595	0.0935375	135.04		8086	0.283987	273.236		2455	0.554928	450.336
	3676	0.095645	136.787		8313	0.29196	278.417		2463	0.556736	451.632
	3751	0.0975964	137.32		8384	0.294454	280.033		2483	0.561257	454.888
	3774	0.0981948	137.413		8641	0.30348	285.865		2508	0.566908	458.991
	3778	0.0982989	137.644		8666	0.304358	286.431		2575	0.582052	470.187
	3788	0.0985591	137.783		8743	0.307062	288.173		2609	0.589738	475.991
	3794	0.0987152	138.083		8808	0.309345	289.643		2743	0.620027	499.858
	3807	0.0990534	138.198		8850	0.31082	290.591		2758	0.623418	502.646
	3812	0.0991835	147.059		8873	0.311628	291.11
	4203	0.109357	147.371		8910	0.312927	291.945
	4217	0.109721	148.459		9045	0.317668	294.988
	4266	0.110996	148.99		9203	0.323218	298.543
	4290	0.111621	149.056		9323	0.327432	301.239
	4293	0.111699	150.248		9463	0.332349	304.38
	4347	0.113104	150.687		9480	0.332946	304.761
	4367	0.113624	152.702		9722	0.341445	310.181
	4577	0.119088	155.264		9927	0.348645	314.765
	4591	0.119452	155.566		10188	0.357812	320.595
	4618	0.120155	156.148		10191	0.357917	320.662
	4642	0.120779	156.665
	4763	0.123927	159.256
	4768	0.124057	159.363
	4810	0.12515	160.256
	4903	0.12757	162.226
	5033	0.130952	164.957
	5086	0.132331	166.064
	5220	0.135818	168.845
	5228	0.136026	169.01
	5253	0.136677	169.526
	5317	0.138342	170.843
	5338	0.138888	171.274
	5350	0.1392	171.52
	5437	0.141464	173.298
	5446	0.141698	173.481
	5486	0.142739	174.295
	5578	0.145133	176.16
	5904	0.153615	182.689
	6262	0.16293	189.727
	6285	0.163528	190.175
	6348	0.165167	191.399
	6352	0.165271	191.476
	6371	0.165766	191.844
	6371	0.165766	191.844
	6441	0.167587	193.199
	6480	0.168602	193.951
	6604	0.171828	196.334
	6685	0.173935	197.884
	6695	0.174196	198.075
	6697	0.174248	198.113
	6866	0.178645	201.326
	6913	0.179868	202.215
	6918	0.179998	202.31
	6931	0.180336	202.555

## Sheet: Fig. 1E and S1N
	Fig. 1E: differentially expressed genes during M-G1 transition as determined by FUCCI timing.							Supplemental Fig. 1N: differentially expressed genes during M-G1 transition as determined by Monocle trajectory inference.
	upregulated	downregulated						upregulated	downregulated
	ARID5B	AAK1						ACTA2	AAK1
	ARL4C	ABL2						AMTN	ABL2
	BTBD2	ANLN						ARID5B	AKIRIN2
	C4orf3	ARHGAP11A						ARL4C	ANKRD12
	C5orf30	ARL4A						ATN1	ANLN
	CHPF	ARL6IP1						ATXN2L	ARHGAP11A
	CTSD	ASF1B						BTBD2	ARHGEF28
	EFEMP1	ASPM						C16orf13	ARID1A
	F2RL2	AURKA						C5orf30	ARL4A
	F2R	AURKB						C9orf16	ASF1B
	F3	BRCA1						CDKN1A	ASPM
	FOXJ3	BRD8						CDKN2A	ATP2B1
	IGFBP7	BTG3						CERCAM	ATP8B1
	ITM2B	BUB1B						CERS2	AURKA
	JAK1	BUB1						CHPF	AURKB
	JUN	BUB3						CMTM3	BRCA1
	LOC152217	C12orf65						COPG1	BRD4
	LOC730101	C18orf54						CPA4	BRD8
	LOXL1	C2orf69						CTSD	BTG3
	LPIN1	C4orf46						DANCR	BUB1B
	LRP1	CCDC14						DHRS3	BUB1
	MAST4	CCDC82						EFEMP1	BUB3
	MIR100HG	CCDC85C						EIF4A2	C12orf65
	MMP2	CCNA2						EIF4B	C18orf54
	MXRA8	CCNB1						F2RL2	C2orf69
	NEAT1	CCNB2						F2R	C4orf46
	PTX3	CCNF						F3	C9orf40
	SCD	CDC20						FAM20C	CBR3
	SLBP	CDC25B						G0S2	CCBE1
	SLC20A1	CDC27						GNS	CCDC14
	SLC38A2	CDCA2						HEG1	CCDC34
	SNHG3	CDCA3						HEXIM1	CCDC85C
	SOX4	CDCA4						ID3	CCNA2
	SVIL	CDCA5						IGFBP7	CCNB1
	TGFBI	CDCA8						ISCU	CCNF
	TGFBR2	CDK1						ITM2B	CCNI
	TPP1	CDK5RAP2						JUN	CDC20
	TRAPPC1	CDKN1B						LINC00657	CDC25B
	TSC22D1	CDKN2C						LOC152217	CDC27
	VEGFA	CDKN2D						LOC730101	CDCA2
	ZNF395	CDR2						LOXL1	CDCA3
	ZNF580	CENPA						LPCAT2	CDCA4
		CENPE						LPIN1	CDCA5
		CENPF						MAP2K2	CDCA8
		CENPK						MBNL2	CDK1
		CEP350						MIR100HG	CDK2
		CEP55						MMP2	CDK5RAP2
		CIT						NEAT1	CDKN1B
		CKAP2L						NINJ1	CDKN2C
		CKAP2						OS9	CDKN2D
		CKAP5						PAIP2	CENPA
		CKS1B						PEG10	CENPE
		CKS2						PHLDA3	CENPF
		CMC2						PKD1P1	CENPK
		CTCF						PNPLA2	CEP290
		DBF4						PPDPF	CEP350
		DCAF7						PRNP	CEP55
		DEPDC1						PTX3	CIT
		DIAPH3						RAB11B	CKAP2L
		DIXDC1						RARG	CKAP2
		DLGAP5						SCP2	CKAP5
		E2F7						SEMA3C	CKS1B
		ECT2						SERF2	CKS2
		ERCC6L						SKI	CLDN12
		ESCO2						SLBP	CLSPN
		ESPL1						SLC20A1	CMC2
		ETS1						SLC38A2	CTCF
		EZH2						SNHG3	DBF4
		FAM111A						SNHG8	DCAF7
		FAM64A						SOX4	DCP2
		FAM83D						SOX9	DEPDC1
		FANCG						SVIL	DIAPH1
		FANCI						TADA3	DIAPH3
		FAS						TGFBI	DIXDC1
		FBXO5						TGFBR2	DLGAP5
		FOPNL						TNKS1BP1	DNAJC9
		FOSL1						TPP1	DSP
		FOXM1						TRAPPC1	DST
		FZR1						TSC22D1	E2F7
		G2E3						VAMP2	ECT2
		GEN1						VEGFA	EGFR
		GINS1						VMP1	ERC1
		GTSE1						WWTR1	ERCC6L
		H1FX						ZFP36L1	ESCO2
		H2AFX						ZMIZ1	ESPL1
		HIST1H4C						ZNF580	EXOSC10
		HJURP							EZH2
		HMGB2							FADD
		HMMR							FAM111A
		HSPA1A							FAM167A
		ISCA2							FAM64A
		KBTBD2							FAM83D
		KCTD9							FANCG
		KIAA1524							FANCI
		KIF11							FAS
		KIF14							FBXO5
		KIF18A							FEN1
		KIF18B							FGF5
		KIF20B							FOSL1
		KIF22							FOXM1
		KIF23							FOXP1
		KIF2C							FZR1
		KIF4A							G2E3
		KIFC1							GEN1
		KLF2							GGNBP2
		KLF6							GINS1
		KNSTRN							GMNN
		KPNA2							GRK6
		LINC00704							GTSE1
		LMO4							H1FX
		LOC100288637							H2AFX
		LPAR1							HIST1H4C
		LRR1							HJURP
		MAD2L1							HMGB2
		MCM8							HMMR
		MELK							HSP90AA1
		MESDC1							HSPA1A
		MGME1							HSPH1
		MICB							INPP5A
		MIS18BP1							ISCA2
		MKI67							KATNAL1
		MLF1IP							KBTBD2
		MND1							KCNQ1OT1
		MXD3							KCTD9
		MYBL1							KIAA1524
		NAV2							KIF11
		NAV3							KIF14
		NCAPD3							KIF18A
		NCAPG							KIF18B
		NCAPH							KIF20B
		NDC80							KIF22
		NDE1							KIF23
		NEDD1							KIF2C
		NEK2							KIF5B
		NIF3L1							KIFC1
		NUF2							KLF2
		NUP205							KLF6
		NUP50							KNSTRN
		NUP62							KNTC1
		NUPL1							KPNA2
		NUSAP1							LBR
		ORC6							LIMS1
		PAX6							LINC00704
		PBK							LMO4
		PCF11							LOC100288637
		PCNT							LPAR1
		PHF17							LPP
		PHF19							LRR1
		PIF1							LRRFIP1
		PILRB							MAD2L1
		PIM3							MALAT1
		PLEKHO1							MAP7D3
		PLK1							MARCH4
		PMP22							MBD4
		POC1A							MCM8
		POLQ							MED13L
		PRC1							MELK
		PRDM8							MESDC1
		PRR11							MGLL
		PSD3							MGME1
		PSRC1							MICALL1
		RACGAP1							MICB
		RAD21							MID1
		RAD51AP1							MIS18BP1
		RBBP8							MKI67
		RFC3							MLF1IP
		RFWD3							MND1
		RHNO1							MTMR6
		RPP30							MXD3
		RRM2							MYBL1
		RTKN2							MYBL2
		SAC3D1							MYO9B
		SAP130							MZT1
		SERTAD2							NAV2
		SETD8							NAV3
		SGOL1							NCAPD3
		SGOL2							NCAPG2
		SHCBP1							NCAPG
		SKA1							NCAPH
		SKA3							NDC80
		SMC2							NDE1
		SMC4							NEDD1
		SOGA1							NEDD4L
		SPAG5							NEK2
		SPC25							NEXN
		SPDL1							NFATC2IP
		SRGAP1							NIF3L1
		STIL							NIPAL3
		STK17B							NUF2
		SUV39H1							NUP50
		TACC3							NUP62
		TBC1D2							NUP85
		TCF19							NUPL1
		TDP1							NUSAP1
		TEX30							ODF2L
		TGIF1							ORC6
		TJP2							OXTR
		TM4SF1							PARP2
		TMEM138							PAWR
		TMEM194A							PAX6
		TMEM48							PBK
		TMPO-AS1							PBRM1
		TMPO							PBX3
		TNFAIP8L1							PCF11
		TOP2A							PCNT
		TPX2							PDS5B
		TRIM59							PHACTR4
		TROAP							PHF17
		TTK							PHIP
		TUBA1C							PIF1
		UBALD2							PILRB
		UBE2C							PIM3
		UBE2T							PLEKHA5
		USP1							PLEKHO1
		VANGL1							PLK1
		WEE1							PNP
		WHSC1							POC1A
		WSB1							POLQ
		YWHAH							PPIB
		ZWINT							PPM1B
									PRC1
									PRDM8
									PRR11
									PSD3
									PSRC1
									QSER1
									RAB32
									RABIF
									RACGAP1
									RAD21
									RAD51AP1
									RASAL2
									RBBP6
									RBBP8
									RFC3
									RFWD3
									RHNO1
									RNF26
									ROCK1
									RPA2
									RRM1
									RRM2
									RTKN2
									SAC3D1
									SACS
									SAP130
									SAPCD2
									SEC22C
									SERTAD2
									SETD8
									SGOL1
									SGOL2
									SHCBP1
									SKA1
									SKA3
									SLC37A4
									SLK
									SMC2
									SMC4
									SOGA1
									SOX11
									SPAG5
									SPC25
									SPDL1
									SPRYD3
									SRGAP1
									STIL
									STK17B
									SUV39H1
									SWAP70
									TACC3
									TBC1D2
									TCF19
									TDP1
									TEX30
									TGIF1
									THOC2
									THOP1
									TIMELESS
									TJP2
									TMEM138
									TMEM194A
									TMEM245
									TMEM48
									TMPO-AS1
									TMPO
									TNFAIP8L1
									TNPO3
									TOP1
									TOP2A
									TPR
									TPX2
									TRIM59
									TRIO
									TROAP
									TTK
									TTL
									TUBA1C
									TUBB4B
									UBALD2
									UBAP2
									UBE2C
									UBE2S
									UBE2T
									UBR4
									USP13
									USP1
									VANGL1
									VEGFC
									VEPH1
									WEE1
									WHSC1
									WNT5B
									WSB1
									YWHAH
									ZC3H13
									ZFHX4
									ZWINT

## Sheet: Fig. S1L
	Supplemental Fig. 1L: Differential expression analysis (G2/M versus G1) of cell cycle genes derived from Cyclebase 3.0
					*ND: not determined, NS: not significant				Percentage of
	Gene name	ENSEMBL ID	Log2 fold change (G1/G2)	p value	Category*		Overview		all	determine here
	ABCC5	ENSP00000333926	ND	ND	ND		Not determined in this study	175	0.462963	N/A
	ACTR2	ENSP00000367220	-0.0970563	0.455837	NS		Not significantly up/down	94	0.248677	0.463054
	ADGRE5	ENSP00000242786	ND	ND	ND		Downregulated	107	0.283069	0.527094
	ADH4	ENSP00000265512	ND	ND	ND		Upregulated	2	0.00529101	0.00985222
	AFAP1	ENSP00000371983	0.621579	0.751302	NS
	AHI1	ENSP00000265602	-0.592791	0.546095	NS
	AKIRIN2	ENSP00000257787	-0.922491	2.61294e-16	NS
	ALKBH7	ENSP00000245812	ND	ND	ND
	ANKRD10	ENSP00000267339	ND	ND	ND
	ANKRD36C	ENSP00000403302	ND	ND	ND
	ANLN	ENSP00000265748	-2.35599	4.14579e-69	Downregulated
	ANP32E	ENSP00000324074	-0.763818	2.71287e-06	NS
	ANTXR1	ENSP00000301945	0.32992	0.501352	NS
	AOC2	ENSP00000253799	ND	ND	ND
	ARGLU1	ENSP00000383059	0.672034	5.16697e-06	NS
	ARHGAP11A	ENSP00000355090	-3.82048	2.70914e-106	Downregulated
	ARHGAP11B	ENSP00000392760	ND	ND	ND
	ARHGEF39	ENSP00000367638	ND	ND	ND
	ARL4A	ENSP00000349250	-1.52563	1.98514e-10	Downregulated
	ARL6IP1	ENSP00000306788	-1.18061	5.61842e-40	Downregulated
	ASF1B	ENSP00000263382	-2.29061	3.81525e-27	Downregulated
	ASIP	ENSP00000364092	ND	ND	ND
	ASXL1	ENSP00000364839	-0.488638	0.000301625	NS
	ATAD2	ENSP00000287394	-1.19037	0.00387809	NS
	ATL2	ENSP00000368237	ND	ND	ND
	ATRIP	ENSP00000323099	ND	ND	ND
	AURKA	ENSP00000216911	-3.50772	3.49748e-162	Downregulated
	AURKB	ENSP00000463999	-4.20789	3.33098e-128	Downregulated
	BIRC2	ENSP00000227758	-0.913629	1.2631e-12	NS
	BIRC3	ENSP00000263464	ND	ND	ND
	BIRC5	ENSP00000301633	-0.283909	6.43809e-05	NS
	BMP2	ENSP00000368104	ND	ND	ND
	BORA	ENSP00000375082	ND	ND	ND
	BRCA1	ENSP00000418960	-1.67874	1.90845e-14	Downregulated
	BRD8	ENSP00000254900	-2.12243	2.63934e-53	Downregulated
	BTBD3	ENSP00000367471	ND	ND	ND
	BTNL9	ENSP00000330200	ND	ND	ND
	BUB1	ENSP00000302530	-1.68128	2.04568e-26	Downregulated
	BUB1B	ENSP00000287598	-2.68946	6.22982e-57	Downregulated
	BUB3	ENSP00000357858	-1.6957	3.4245e-85	Downregulated
	C11orf82	ENSP00000414687	ND	ND	ND
	CASP3	ENSP00000311032	ND	ND	ND
	CCDC107	ENSP00000414964	ND	ND	ND
	CCN4	ENSP00000250160	ND	ND	ND
	CCNA2	ENSP00000274026	-3.39572	7.30885e-115	Downregulated
	CCNB1	ENSP00000256442	-1.41816	1.51854e-30	Downregulated
	CCNB2	ENSP00000288207	-1.18012	1.25036e-13	Downregulated
	CCNE1	ENSP00000262643	ND	ND	ND
	CCNE2	ENSP00000309181	ND	ND	ND
	CCNF	ENSP00000380256	-4.32349	3.26367e-87	Downregulated
	CDC20	ENSP00000308450	-1.42845	1.05528e-25	Downregulated
	CDC25A	ENSP00000303706	ND	ND	ND
	CDC25B	ENSP00000245960	-2.7408	6.02732e-102	Downregulated
	CDC25C	ENSP00000321656	ND	ND	ND
	CDC27	ENSP00000434614	-1.18549	3.03126e-19	Downregulated
	CDC6	ENSP00000209728	ND	ND	ND
	CDCA2	ENSP00000328228	-3.85997	2.62393e-99	Downregulated
	CDCA3	ENSP00000442068	-1.51043	4.78479e-28	Downregulated
	CDCA5	ENSP00000275517	-2.83621	5.87606e-46	Downregulated
	CDCA7	ENSP00000306968	ND	ND	ND
	CDCA7L	ENSP00000383986	ND	ND	ND
	CDCA8	ENSP00000316121	-5.1687	1.88978e-177	Downregulated
	CDH24	ENSP00000267383	ND	ND	ND
	CDK1	ENSP00000378699	-5.91084	0	Downregulated
	CDKL5	ENSP00000369325	ND	ND	ND
	CDKN1B	ENSP00000228872	-1.16457	2.94723e-13	Downregulated
	CDKN2AIP	ENSP00000427108	ND	ND	ND
	CDKN2C	ENSP00000262662	-2.08563	1.20077e-38	Downregulated
	CDKN3	ENSP00000335357	-0.486781	4.84513e-05	NS
	CENPA	ENSP00000336868	-3.83796	3.41201e-68	Downregulated
	CENPE	ENSP00000265148	-3.16198	2.33209e-145	Downregulated
	CENPF	ENSP00000355922	-2.52376	3.62908e-112	Downregulated
	CENPL	ENSP00000348527	ND	ND	ND
	CENPQ	ENSP00000337289	ND	ND	ND
	CENPU	ENSP00000281453	ND	ND	ND
	CEP20	ENSP00000255759	ND	ND	ND
	CEP55	ENSP00000360540	-1.76651	7.80188e-37	Downregulated
	CEP70	ENSP00000264982	ND	ND	ND
	CHAF1B	ENSP00000315700	ND	ND	ND
	CIP2A	ENSP00000295746	ND	ND	ND
	CIT	ENSP00000376306	-1.30218	2.40775e-19	Downregulated
	CKAP2	ENSP00000367276	-2.93448	1.5694e-136	Downregulated
	CKAP2L	ENSP00000305204	-4.48577	1.04876e-68	Downregulated
	CKAP5	ENSP00000432768	-1.47535	6.73562e-27	Downregulated
	CKS1B	ENSP00000311083	-1.43005	2.63767e-28	Downregulated
	CKS2	ENSP00000364976	-2.8221	1.55677e-105	Downregulated
	CLSPN	ENSP00000312995	-1.23819	2.61612e-05	NS
	CNIH4	ENSP00000420443	-0.79948	6.72753e-07	NS
	CNTROB	ENSP00000369614	-0.650603	0.00235466	NS
	COQ6	ENSP00000333946	ND	ND	ND
	CPLANE1	ENSP00000389014	ND	ND	ND
	CREBZF	ENSP00000433459	ND	ND	ND
	CTNNA1	ENSP00000304669	0.0881463	0.387337	NS
	CYP4V2	ENSP00000368079	ND	ND	ND
	DCAF7	ENSP00000308344	-1.14414	6.55933e-21	Downregulated
	DCTPP1	ENSP00000322524	0.428737	0.00155013	NS
	DDX11	ENSP00000384703	ND	ND	ND
	DDX58	ENSP00000369213	ND	ND	ND
	DEPDC1	ENSP00000412292	-2.48299	2.16551e-56	Downregulated
	DEPDC1B	ENSP00000265036	ND	ND	ND
	DHFR2	ENSP00000319170	ND	ND	ND
	DKC1	ENSP00000358563	0.399365	0.0653545	NS
	DLGAP5	ENSP00000247191	-1.37896	1.71319e-13	Downregulated
	DNAH11	ENSP00000330671	ND	ND	ND
	DNAJB1	ENSP00000254322	-0.785002	7.79215e-11	NS
	DNAJB6	ENSP00000262177	-0.200454	0.0109003	NS
	DNMT3B	ENSP00000328547	ND	ND	ND
	DONSON	ENSP00000307143	-0.223474	0.781157	NS
	DSCC1	ENSP00000322180	ND	ND	ND
	DTL	ENSP00000355958	ND	ND	ND
	DYNLL1	ENSP00000242577	0.202218	0.962633	NS
	E2F1	ENSP00000345571	ND	ND	ND
	E2F2	ENSP00000355249	ND	ND	ND
	E2F5	ENSP00000398124	ND	ND	ND
	E2F8	ENSP00000250024	ND	ND	ND
	ECT2	ENSP00000232458	-2.91744	1.72163e-54	Downregulated
	EFHC1	ENSP00000360107	ND	ND	ND
	EIF5A2	ENSP00000295822	ND	ND	ND
	ELOA	ENSP00000395574	ND	ND	ND
	ENSG00000203691	ENSP00000355810	ND	ND	ND
	ERN2	ENSP00000256797	ND	ND	ND
	ESCO2	ENSP00000306999	-2.91702	3.04665e-20	Downregulated
	ESPL1	ENSP00000257934	-4.05141	6.13407e-52	Downregulated
	ETV4	ENSP00000321835	ND	ND	ND
	EXO1	ENSP00000311873	ND	ND	ND
	EZH2	ENSP00000320147	-1.82	7.32319e-17	Downregulated
	FAM102B	ENSP00000359052	ND	ND	ND
	FAM111B	ENSP00000341565	ND	ND	ND
	FAM189B	ENSP00000354958	ND	ND	ND
	FAM214A	ENSP00000261844	ND	ND	ND
	FAM216A	ENSP00000366901	-0.19748	0.315086	NS
	FAM72A	ENSP00000356096	ND	ND	ND
	FAM72B	ENSP00000358397	ND	ND	ND
	FAM83D	ENSP00000217429	-5.19851	1.75888e-226	Downregulated
	FANCD2	ENSP00000287647	ND	ND	ND
	FANCI	ENSP00000310842	-1.60958	7.86891e-14	Downregulated
	FEN1	ENSP00000305480	-0.771597	0.00327938	NS
	FOXM1	ENSP00000342307	-1.04735	3.03958e-18	Downregulated
	FZR1	ENSP00000378529	-1.84787	2.76622e-14	Downregulated
	G2E3	ENSP00000206595	-1.83648	2.3416e-54	Downregulated
	GABPB1	ENSP00000220429	ND	ND	ND
	GAS1	ENSP00000298743	ND	ND	ND
	GAS2L3	ENSP00000266754	ND	ND	ND
	GAS6	ENSP00000331831	-0.191594	0.127331	NS
	GCLM	ENSP00000359258	ND	ND	ND
	GCSAM	ENSP00000419485	ND	ND	ND
	GINS2	ENSP00000253462	0.28659	0.0454848	NS
	GMNN	ENSP00000230056	-0.794755	5.18638e-06	NS
	GOLGA8A	ENSP00000352111	ND	ND	ND
	GPSM2	ENSP00000264126	ND	ND	ND
	GRPEL1	ENSP00000264954	-0.152324	0.58469	NS
	GSE1	ENSP00000253458	ND	ND	ND
	GTSE1	ENSP00000415430	-2.63197	2.03068e-63	Downregulated
	H1-0	ENSP00000344504	ND	ND	ND
	H2AC6	ENSP00000321389	ND	ND	ND
	H2AX	ENSP00000364310	ND	ND	ND
	H2BC21	ENSP00000358151	ND	ND	ND
	H4C3	ENSP00000367034	ND	ND	ND
	HBG2	ENSP00000338082	ND	ND	ND
	HELLS	ENSP00000239027	-0.587779	0.465495	NS
	HIF1A	ENSP00000338018	ND	ND	ND
	HINT3	ENSP00000229633	ND	ND	ND
	HIST1H4B	ENSP00000366581	ND	ND	ND
	HIST2H4A	ENSP00000358162	ND	ND	ND
	HIST2H4B	ENSP00000358153	ND	ND	ND
	HJURP	ENSP00000414109	-4.6275	1.90224e-231	Downregulated
	HLA-DRA	ENSP00000372746	ND	ND	ND
	HMG20B	ENSP00000328269	0.419924	0.020426	NS
	HMGB2	ENSP00000296503	-3.88315	4.95414e-153	Downregulated
	HMGB3	ENSP00000359393	0.33544	0.0287695	NS
	HMMR	ENSP00000377492	-1.46356	2.55072e-30	Downregulated
	HORMAD1	ENSP00000355167	ND	ND	ND
	HP1BP3	ENSP00000312625	-0.86231	2.18631e-23	NS
	HSPA1L	ENSP00000364805	ND	ND	ND
	HSPA2	ENSP00000247207	ND	ND	ND
	HSPA4	ENSP00000302961	0.273649	0.0465117	NS
	HSPA8	ENSP00000227378	-0.792696	2.45861e-36	NS
	HSPB8	ENSP00000281938	ND	ND	ND
	IDO1	ENSP00000430505	ND	ND	ND
	IER5	ENSP00000356549	-0.711103	0.359986	NS
	IFIT2	ENSP00000360891	ND	ND	ND
	IL6	ENSP00000258743	ND	ND	ND
	IL7R	ENSP00000306157	ND	ND	ND
	INPP5K	ENSP00000413937	ND	ND	ND
	INSIG2	ENSP00000245787	ND	ND	ND
	INTS8	ENSP00000430338	ND	ND	ND
	IQGAP3	ENSP00000354451	-0.821551	3.1774e-10	NS
	IRAK1	ENSP00000358997	-0.0985529	0.833643	NS
	IVNS1ABP	ENSP00000356468	-0.896468	0.000761614	NS
	JPT1	ENSP00000348316	ND	ND	ND
	KBTBD2	ENSP00000302586	-1.37844	1.14031e-21	Downregulated
	KIF11	ENSP00000260731	-3.07167	4.41351e-119	Downregulated
	KIF14	ENSP00000356319	-3.3227	5.00798e-84	Downregulated
	KIF20B	ENSP00000260753	-2.58298	7.92127e-97	Downregulated
	KIF23	ENSP00000260363	-4.22998	1.24519e-169	Downregulated
	KIF2C	ENSP00000361298	-3.17398	1.61105e-82	Downregulated
	KIF5B	ENSP00000307078	-0.692984	4.4618e-11	NS
	KIFC1	ENSP00000363647	-2.65702	6.30174e-34	Downregulated
	KLF6	ENSP00000419923	-2.42117	3.88173e-33	Downregulated
	KLF9	ENSP00000366330	ND	ND	ND
	KMO	ENSP00000355517	ND	ND	ND
	KNSTRN	ENSP00000249776	-2.66744	1.4276e-65	Downregulated
	KPNA2	ENSP00000332455	-2.37718	1.1923e-72	Downregulated
	LARP1	ENSP00000336721	0.343338	0.993043	NS
	LBR	ENSP00000272163	-0.942258	7.13162e-16	NS
	LIPH	ENSP00000296252	ND	ND	ND
	LMNA	ENSP00000357283	0.303363	0.25077	NS
	LPP	ENSP00000318089	-0.692247	8.99489e-11	NS
	LRATD2	ENSP00000302578	ND	ND	ND
	LRIF1	ENSP00000358778	ND	ND	ND
	LRRC17	ENSP00000344242	ND	ND	ND
	LTBP3	ENSP00000301873	ND	ND	ND
	MAD2L1	ENSP00000296509	-1.72825	5.47585e-15	Downregulated
	MAP2K6	ENSP00000468348	ND	ND	ND
	MAPK13	ENSP00000211287	ND	ND	ND
	MASTL	ENSP00000365107	ND	ND	ND
	MBOAT1	ENSP00000324944	ND	ND	ND
	MCM2	ENSP00000265056	0.440753	0.00833445	NS
	MCM4	ENSP00000262105	0.484743	0.00878517	NS
	MCM5	ENSP00000216122	-0.184295	0.147587	NS
	MCM6	ENSP00000264156	ND	ND	ND
	MELK	ENSP00000298048	-3.02823	4.67729e-68	Downregulated
	MEPCE	ENSP00000308546	-0.371291	0.110131	NS
	MGAT2	ENSP00000307423	-0.643488	0.0189471	NS
	MIS18BP1	ENSP00000309790	-1.70637	9.20259e-35	Downregulated
	MKI67	ENSP00000357643	-2.42515	7.11848e-128	Downregulated
	MND1	ENSP00000240488	-1.5387	2.19273e-12	Downregulated
	MSH2	ENSP00000233146	-0.936684	0.236333	NS
	MSH5	ENSP00000364855	ND	ND	ND
	MSL1	ENSP00000462945	-0.399743	1.71041e-07	NS
	MUC1	ENSP00000357380	ND	ND	ND
	MZT1	ENSP00000367049	-0.942551	8.68282e-14	NS
	NASP	ENSP00000255120	0.657668	0.0203013	NS
	NCAPH	ENSP00000240423	-3.02971	2.4198e-54	Downregulated
	NCOA3	ENSP00000361066	ND	ND	ND
	NDC80	ENSP00000261597	-3.63141	7.64477e-81	Downregulated
	NDE1	ENSP00000345892	-2.0651	1.50532e-29	Downregulated
	NEIL3	ENSP00000264596	ND	ND	ND
	NEK2	ENSP00000355966	-2.60922	8.79166e-46	Downregulated
	NFE2L2	ENSP00000380252	-0.131728	0.689935	NS
	NLRP2	ENSP00000409370	ND	ND	ND
	NNMT	ENSP00000299964	ND	ND	ND
	NR2F6	ENSP00000291442	ND	ND	ND
	NUF2	ENSP00000271452	-3.53417	1.50343e-65	Downregulated
	NUP35	ENSP00000295119	ND	ND	ND
	NUSAP1	ENSP00000453403	-2.43659	1.5217e-73	Downregulated
	NXF1	ENSP00000294172	0.74513	0.0416108	NS
	ODF2	ENSP00000361882	0.393641	0.0448224	NS
	OLR1	ENSP00000309124	ND	ND	ND
	OPN3	ENSP00000355512	ND	ND	ND
	ORC1	ENSP00000360621	ND	ND	ND
	PAQR4	ENSP00000321804	ND	ND	ND
	PBK	ENSP00000301905	-1.89515	5.55458e-13	Downregulated
	PCBP1	ENSP00000305556	-0.349257	7.87253e-05	NS
	PCF11	ENSP00000298281	-1.11862	5.71732e-15	Downregulated
	PCNA	ENSP00000368438	0.150606	0.142945	NS
	PCSK6	ENSP00000305056	ND	ND	ND
	PIF1	ENSP00000268043	-4.33793	2.96122e-43	Downregulated
	PIMREG	ENSP00000250056	-1.99851	4.00216e-11	Downregulated
	PKMYT1	ENSP00000262300	ND	ND	ND
	PLAG1	ENSP00000325546	ND	ND	ND
	PLCXD1	ENSP00000371073	ND	ND	ND
	PLEKHG4B	ENSP00000283426	ND	ND	ND
	PLK1	ENSP00000300093	-2.35537	2.69421e-102	Downregulated
	PNRC2	ENSP00000334840	-0.943666	3.80007e-33	NS
	POLD3	ENSP00000263681	ND	ND	ND
	POLQ	ENSP00000264233	-2.70196	4.18238e-20	Downregulated
	PPP1R10	ENSP00000365694	ND	ND	ND
	PPP1R10	ENSP00000373080	ND	ND	ND
	PRC1	ENSP00000377793	-1.20476	1.44734e-37	Downregulated
	PRR11	ENSP00000262293	-1.12728	3.01565e-15	Downregulated
	PSMG3	ENSP00000252329	ND	ND	ND
	PSRC1	ENSP00000358919	-3.18347	5.58723e-72	Downregulated
	PTTG1	ENSP00000344936	-0.402798	0.562399	NS
	PWP1	ENSP00000387365	0.374126	0.704155	NS
	RAD21	ENSP00000297338	-1.28301	2.70189e-22	Downregulated
	RAD51AP1	ENSP00000228843	-2.11049	2.42495e-33	Downregulated
	RAD51C	ENSP00000336701	ND	ND	ND
	RAD54L	ENSP00000361043	ND	ND	ND
	RAN	ENSP00000376176	-0.376611	0.104546	NS
	RANGAP1	ENSP00000348577	-0.575384	5.21583e-06	NS
	RBBP8	ENSP00000323050	-1.01266	2.94995e-07	Downregulated
	RCAN1	ENSP00000320768	ND	ND	ND
	RFC2	ENSP00000055077	-0.308982	0.567836	NS
	RFC4	ENSP00000296273	ND	ND	ND
	RGS3	ENSP00000259406	-0.210071	0.17122	NS
	RHNO1	ENSP00000438590	-1.50422	2.70999e-22	Downregulated
	RHOBTB3	ENSP00000369318	-0.189191	0.555397	NS
	RHPN1	ENSP00000289013	ND	ND	ND
	RIDA	ENSP00000254878	ND	ND	ND
	RPL37	ENSP00000274242	-0.129448	0.00316975	NS
	RRM2	ENSP00000353770	-2.11869	1.10364e-60	Downregulated
	RRP1	ENSP00000417464	ND	ND	ND
	RSRP1	ENSP00000243189	ND	ND	ND
	RUNX1	ENSP00000300305	-0.700512	0.0294083	NS
	SAP30	ENSP00000296504	ND	ND	ND
	SAPCD2	ENSP00000386348	-0.928717	2.00126e-08	NS
	SCYL1	ENSP00000270176	ND	ND	ND
	SELENON	ENSP00000355141	ND	ND	ND
	SEPHS1	ENSP00000367893	-0.518397	0.00532916	NS
	SERPINB4	ENSP00000343445	ND	ND	ND
	SFPQ	ENSP00000349748	-0.408157	0.00351593	NS
	SGCD	ENSP00000338343	ND	ND	ND
	SGO2	ENSP00000350447	-3.84469	2.97448e-70	Downregulated
	SH3GL2	ENSP00000369981	ND	ND	ND
	SHCBP1	ENSP00000306473	-1.60404	1.53515e-20	Downregulated
	SKA3	ENSP00000319417	-2.29616	1.15912e-35	Downregulated
	SKP2	ENSP00000274255	ND	ND	ND
	SLBP	ENSP00000417686	1.21101	2.46688e-12	Upregulated
	SLC17A2	ENSP00000353677	ND	ND	ND
	SLC1A3	ENSP00000265113	ND	ND	ND
	SLC25A29	ENSP00000352167	ND	ND	ND
	SLC39A10	ENSP00000352655	0.336034	0.801805	NS
	SMAD3	ENSP00000332973	0.461992	0.000800175	NS
	SMC4	ENSP00000341382	-1.54138	1.56568e-64	Downregulated
	SMTN	ENSP00000351593	-0.606947	0.000729844	NS
	SORBS2	ENSP00000284776	ND	ND	ND
	SPAG5	ENSP00000323300	-1.58846	3.8651e-22	Downregulated
	SPDL1	ENSP00000265295	-1.77319	1.07953e-47	Downregulated
	SRD5A1	ENSP00000274192	ND	ND	ND
	SREK1	ENSP00000334538	-0.290841	0.0631839	NS
	SRSF3	ENSP00000362820	-0.560306	2.97091e-11	NS
	STAG1	ENSP00000372689	ND	ND	ND
	STAT1	ENSP00000354394	-0.24413	0.41879	NS
	STAT5B	ENSP00000293328	ND	ND	ND
	STIL	ENSP00000360944	-2.92296	1.62305e-47	Downregulated
	STK17B	ENSP00000263955	-1.35891	4.36549e-10	Downregulated
	SUCLG2	ENSP00000419325	-0.280207	0.41339	NS
	TACC3	ENSP00000326550	-2.32788	1.0461e-73	Downregulated
	TIMP1	ENSP00000218388	0.645126	1.0093e-12	NS
	TMED7	ENSP00000405926	0.60976	0.00246154	NS
	TOP2A	ENSP00000411532	-3.65536	0	Downregulated
	TOPBP1	ENSP00000260810	-0.423985	0.329493	NS
	TPX2	ENSP00000300403	-1.76903	3.8207e-35	Downregulated
	TRIP13	ENSP00000166345	-1.0789	0.000149753	NS
	TRMT2A	ENSP00000252136	ND	ND	ND
	TROAP	ENSP00000257909	-3.146	2.18319e-267	Downregulated
	TSC22D1	ENSP00000397435	1.80838	3.51563e-37	Upregulated
	TTC38	ENSP00000370419	ND	ND	ND
	TTK	ENSP00000358813	-4.71674	5.85225e-106	Downregulated
	TUBA1A	ENSP00000301071	0.319183	0.944178	NS
	TUBA3D	ENSP00000326042	ND	ND	ND
	TUBA4A	ENSP00000248437	ND	ND	ND
	TUBB	ENSP00000373058	-0.727557	8.27948e-09	NS
	TUBB	ENSP00000339001	-0.727557	8.27948e-09	NS
	TUBB2A	ENSP00000369703	-0.191194	0.356543	NS
	TUBB4B	ENSP00000341289	-0.988588	1.38315e-14	NS
	TUBD1	ENSP00000320797	ND	ND	ND
	UBE2C	ENSP00000348838	-4.0012	3.88573e-252	Downregulated
	UBE2D3	ENSP00000349722	0.114736	0.850361	NS
	UBE2S	ENSP00000264552	-0.993669	1.14738e-09	NS
	UBE2T	ENSP00000356243	-1.91469	4.36504e-34	Downregulated
	UBR5	ENSP00000429084	-0.266716	0.0856992	NS
	UBR7	ENSP00000013070	ND	ND	ND
	UNG	ENSP00000242576	ND	ND	ND
	USB1	ENSP00000219281	-0.0633498	0.751721	NS
	USP1	ENSP00000343526	-1.55054	7.42702e-17	Downregulated
	VANGL1	ENSP00000310800	-1.25558	9.09638e-13	Downregulated
	VEGFC	ENSP00000280193	0.756396	0.16804	NS
	VPS25	ENSP00000253794	-0.931359	0.111565	NS
	WDR76	ENSP00000263795	ND	ND	ND
	WDR90	ENSP00000293879	ND	ND	ND
	WSB1	ENSP00000262394	-1.04551	1.25943e-22	Downregulated
	XBP1	ENSP00000216037	0.496091	0.664336	NS
	XPO4	ENSP00000255305	ND	ND	ND
	XPR1	ENSP00000356562	ND	ND	ND
	YEATS4	ENSP00000247843	ND	ND	ND
	YWHAH	ENSP00000248975	-1.11662	2.07257e-14	Downregulated
	ZC3H3	ENSP00000262577	ND	ND	ND
	ZC3HC1	ENSP00000351052	ND	ND	ND
	ZCCHC14	ENSP00000268616	ND	ND	ND
	ZNF248	ENSP00000349882	ND	ND	ND
	ZNF367	ENSP00000364405	ND	ND	ND
	ZNF414	ENSP00000377504	ND	ND	ND
	ZNF521	ENSP00000354794	ND	ND	ND
	ZPBP	ENSP00000046087	ND	ND	ND
	ZRANB2	ENSP00000359958	0.639409	1.95594e-07	NS
	ZWINT	ENSP00000363055	-1.68756	2.72703e-39	Downregulated

## Sheet: Fig. 2A
	Fig. 2A: Time of maximum negative slope for 220 declined genes and their group classification.
	Gene Names	Time, in minutes after metaphase, of maximum negative slope	Group
	AAK1__chr2	107	Delayed decrease
	ABL2__chr1	0	Immediate decrease
	ANLN__chr7	106	Delayed decrease
	ARHGAP11A__chr15	80	Delayed decrease
	ARL4A__chr7	0	Immediate decrease
	ARL6IP1__chr16	100	Delayed decrease
	ASF1B__chr19	0	Immediate decrease
	ASPM__chr1	92	Delayed decrease
	AURKA__chr20	86	Delayed decrease
	AURKB__chr17	0	Immediate decrease
	BRCA1__chr17	111	Delayed decrease
	BRD8__chr5	78	Delayed decrease
	BTG3__chr21	141	Delayed decrease
	BUB1B__chr15	103	Delayed decrease
	BUB1__chr2	88	Delayed decrease
	BUB3__chr10	53	Delayed decrease
	C12orf65__chr12	57	Delayed decrease
	C18orf54__chr18	95	Delayed decrease
	C2orf69__chr2	44	Delayed decrease
	C4orf46__chr4	39	Delayed decrease
	CCDC14__chr3	0	Immediate decrease
	CCDC82__chr11	84	Delayed decrease
	CCDC85C__chr14	137	Delayed decrease
	CCNA2__chr4	87	Delayed decrease
	CCNB1__chr5	100	Delayed decrease
	CCNB2__chr15	193	Delayed decrease
	CCNF__chr16	0	Immediate decrease
	CDC20__chr1	108	Delayed decrease
	CDC25B__chr20	60	Delayed decrease
	CDC27__chr17	91	Delayed decrease
	CDCA2__chr8	83	Delayed decrease
	CDCA3__chr12	104	Delayed decrease
	CDCA4__chr14	0	Immediate decrease
	CDCA5__chr11	83	Delayed decrease
	CDCA8__chr1	75	Delayed decrease
	CDK1__chr10	0	Immediate decrease
	CDK5RAP2__chr9	130	Delayed decrease
	CDKN1B__chr12	0	Immediate decrease
	CDKN2C__chr1	0	Immediate decrease
	CDKN2D__chr19	0	Immediate decrease
	CDR2__chr16	0	Immediate decrease
	CENPA__chr2	96	Delayed decrease
	CENPE__chr4	102	Delayed decrease
	CENPF__chr1	76	Delayed decrease
	CENPK__chr5	57	Delayed decrease
	CEP350__chr1	62	Delayed decrease
	CEP55__chr10	196	Delayed decrease
	CIT__chr12	99	Delayed decrease
	CKAP2L__chr2	63	Delayed decrease
	CKAP2__chr13	97	Delayed decrease
	CKAP5__chr11	127	Delayed decrease
	CKS1B__chr1	140	Delayed decrease
	CKS2__chr9	93	Delayed decrease
	CMC2__chr16	0	Immediate decrease
	CTCF__chr16	50	Delayed decrease
	DBF4__chr7	68	Delayed decrease
	DCAF7__chr17	0	Immediate decrease
	DEPDC1__chr1	100	Delayed decrease
	DIAPH3__chr13	91	Delayed decrease
	DIXDC1__chr11	91	Delayed decrease
	DLGAP5__chr14	199	Delayed decrease
	E2F7__chr12	0	Immediate decrease
	ECT2__chr3	103	Delayed decrease
	ERCC6L__chrX	75	Delayed decrease
	ESCO2__chr8	0	Immediate decrease
	ESPL1__chr12	0	Immediate decrease
	ETS1__chr11	0	Immediate decrease
	EZH2__chr7	114	Delayed decrease
	FAM111A__chr11	0	Immediate decrease
	FAM64A__chr17	128	Delayed decrease
	FAM83D__chr20	56	Delayed decrease
	FANCG__chr9	0	Immediate decrease
	FANCI__chr15	107	Delayed decrease
	FAS__chr10	0	Immediate decrease
	FBXO5__chr6	0	Immediate decrease
	FOPNL__chr16	118	Delayed decrease
	FOSL1__chr11	0	Immediate decrease
	FOXM1__chr12	108	Delayed decrease
	FZR1__chr19	0	Immediate decrease
	G2E3__chr14	84	Delayed decrease
	GEN1__chr2	87	Delayed decrease
	GINS1__chr20	52	Delayed decrease
	GTSE1__chr22	80	Delayed decrease
	H1FX__chr3	39	Delayed decrease
	H2AFX__chr11	144	Delayed decrease
	HIST1H4C__chr6	0	Immediate decrease
	HJURP__chr2	54	Delayed decrease
	HMGB2__chr4	108	Delayed decrease
	HMMR__chr5	91	Delayed decrease
	HSPA1A__chr6	0	Immediate decrease
	ISCA2__chr14	47	Delayed decrease
	KBTBD2__chr7	69	Delayed decrease
	KCTD9__chr8	66	Delayed decrease
	KIAA1524__chr3	90	Delayed decrease
	KIF11__chr10	77	Delayed decrease
	KIF14__chr1	100	Delayed decrease
	KIF18A__chr11	65	Delayed decrease
	KIF18B__chr17	57	Delayed decrease
	KIF20B__chr10	99	Delayed decrease
	KIF22__chr16	81	Delayed decrease
	KIF23__chr15	76	Delayed decrease
	KIF2C__chr1	81	Delayed decrease
	KIF4A__chrX	155	Delayed decrease
	KIFC1__chr6	95	Delayed decrease
	KLF2__chr19	0	Immediate decrease
	KLF6__chr10	0	Immediate decrease
	KNSTRN__chr15	85	Delayed decrease
	KPNA2__chr17	63	Delayed decrease
	LINC00704__chr10	0	Immediate decrease
	LMO4__chr1	65	Delayed decrease
	LOC100288637__chr15	61	Delayed decrease
	LPAR1__chr9	70	Delayed decrease
	LRR1__chr14	106	Delayed decrease
	MAD2L1__chr4	183	Delayed decrease
	MCM8__chr20	142	Delayed decrease
	MELK__chr9	0	Immediate decrease
	MESDC1__chr15	96	Delayed decrease
	MGME1__chr20	97	Delayed decrease
	MICB__chr6	0	Immediate decrease
	MIS18BP1__chr14	86	Delayed decrease
	MKI67__chr10	98	Delayed decrease
	MLF1IP__chr4	0	Immediate decrease
	MND1__chr4	0	Immediate decrease
	MXD3__chr5	0	Immediate decrease
	MYBL1__chr8	72	Delayed decrease
	NAV2__chr11	79	Delayed decrease
	NAV3__chr12	59	Delayed decrease
	NCAPD3__chr11	0	Immediate decrease
	NCAPG__chr4	91	Delayed decrease
	NCAPH__chr2	82	Delayed decrease
	NDC80__chr18	95	Delayed decrease
	NDE1__chr16	69	Delayed decrease
	NEDD1__chr12	0	Immediate decrease
	NEK2__chr1	134	Delayed decrease
	NIF3L1__chr2	103	Delayed decrease
	NUF2__chr1	94	Delayed decrease
	NUP205__chr7	0	Immediate decrease
	NUP50__chr22	101	Delayed decrease
	NUP62__chr19	39	Delayed decrease
	NUPL1__chr13	83	Delayed decrease
	NUSAP1__chr15	52	Delayed decrease
	ORC6__chr16	85	Delayed decrease
	PAX6__chr11	0	Immediate decrease
	PBK__chr8	142	Delayed decrease
	PCF11__chr11	89	Delayed decrease
	PCNT__chr21	114	Delayed decrease
	PHF17__chr4	0	Immediate decrease
	PHF19__chr9	194	Delayed decrease
	PIF1__chr15	0	Immediate decrease
	PILRB__chr7	53	Delayed decrease
	PIM3__chr22	0	Immediate decrease
	PLEKHO1__chr1	92	Delayed decrease
	PLK1__chr16	97	Delayed decrease
	PMP22__chr17	55	Delayed decrease
	POC1A__chr3	142	Delayed decrease
	POLQ__chr3	59	Delayed decrease
	PRC1__chr15	102	Delayed decrease
	PRDM8__chr4	0	Immediate decrease
	PRR11__chr17	198	Delayed decrease
	PSD3__chr8	65	Delayed decrease
	PSRC1__chr1	76	Delayed decrease
	RACGAP1__chr12	92	Delayed decrease
	RAD21__chr8	112	Delayed decrease
	RAD51AP1__chr12	54	Delayed decrease
	RBBP8__chr18	0	Immediate decrease
	RFC3__chr13	89	Delayed decrease
	RFWD3__chr16	104	Delayed decrease
	RHNO1__chr12	100	Delayed decrease
	RPP30__chr10	38	Delayed decrease
	RRM2__chr2	195	Delayed decrease
	RTKN2__chr10	0	Immediate decrease
	SAC3D1__chr11	0	Immediate decrease
	SAP130__chr2	84	Delayed decrease
	SERTAD2__chr2	62	Delayed decrease
	SETD8__chr12	58	Delayed decrease
	SGOL1__chr3	72	Delayed decrease
	SGOL2__chr2	97	Delayed decrease
	SHCBP1__chr16	108	Delayed decrease
	SKA1__chr18	43	Delayed decrease
	SKA3__chr13	55	Delayed decrease
	SMC2__chr9	107	Delayed decrease
	SMC4__chr3	93	Delayed decrease
	SOGA1__chr20	58	Delayed decrease
	SPAG5__chr17	95	Delayed decrease
	SPC25__chr2	102	Delayed decrease
	SPDL1__chr5	94	Delayed decrease
	SRGAP1__chr12	58	Delayed decrease
	STIL__chr1	67	Delayed decrease
	STK17B__chr2	0	Immediate decrease
	SUV39H1__chrX	87	Delayed decrease
	TACC3__chr4	94	Delayed decrease
	TBC1D2__chr9	0	Immediate decrease
	TCF19__chr6	0	Immediate decrease
	TDP1__chr14	106	Delayed decrease
	TEX30__chr13	190	Delayed decrease
	TGIF1__chr18	0	Immediate decrease
	TJP2__chr9	0	Immediate decrease
	TM4SF1__chr3	146	Delayed decrease
	TMEM138__chr11	45	Delayed decrease
	TMEM194A__chr12	118	Delayed decrease
	TMEM48__chr1	169	Delayed decrease
	TMPO-AS1__chr12	37	Delayed decrease
	TMPO__chr12	97	Delayed decrease
	TNFAIP8L1__chr19	91	Delayed decrease
	TOP2A__chr17	0	Immediate decrease
	TPX2__chr20	198	Delayed decrease
	TRIM59__chr3	72	Delayed decrease
	TROAP__chr12	62	Delayed decrease
	TTK__chr6	70	Delayed decrease
	TUBA1C__chr12	0	Immediate decrease
	UBALD2__chr17	97	Delayed decrease
	UBE2C__chr20	0	Immediate decrease
	UBE2T__chr1	54	Delayed decrease
	USP1__chr1	42	Delayed decrease
	VANGL1__chr1	75	Delayed decrease
	WEE1__chr11	56	Delayed decrease
	WHSC1__chr4	104	Delayed decrease
	WSB1__chr17	65	Delayed decrease
	YWHAH__chr22	196	Delayed decrease
	ZWINT__chr10	62	Delayed decrease

## Sheet: Fig 2A,B and S3B-G
	Fig. 2A,B and S3B-G: Modeling data for genes downregulated in G1								AAK1				ABL2				ANLN				ARHGAP11A				ARL4A				ARL6IP1				ASF1B				ASPM				AURKA				AURKB				BRCA1
Pseudotime	Spline Time	Model Time	Type gene name here:	cdk1	Data	Spline	Derivative	Model	Data	Spline	Derivative	Model	Data	Spline	Derivative	Model	Data	Spline	Derivative	Model	Data	Spline	Derivative	Model	Data	Spline	Derivative	Model	Data	Spline	Derivative	Model	Data	Spline	Derivative	Model	Data	Spline	Derivative	Model	Data	Spline	Derivative	Model	Data	Spline	Derivative	Model	Data
0	0	0	150	5	0.614108	0.898726	-0.0178662	0.998588	0.978929	1.01131	2.92354e-05	0.971936	1.12386	0.943118	-0.0107527	1	0.548658	1.00469	-0.00138771	0.925196	0.420225	1.00883	-0.0020749	0.936202	0.878346	0.977077	-0.00542861	1.00322	0.653491	1.04873	0.00528332	1.16115	1.08296	0.977416	-0.00538833	1.00519	0.505929	1.0293	0.00132858	1.05389	0.647593	1.0495	0.00395621	1.13251	0.735156	0.982302	-0.00785303	1.00494	1.08642
0	1	1	ET	6	1.15755	0.880861	-0.0178618	0.942756	0.76866	1.01134	2.87491e-05	0.971936	1.13423	0.932366	-0.0107503	0.688888	1.06963	1.0033	-0.00138791	0.925196	1.19012	1.00675	-0.00207528	0.936202	0.886453	0.971649	-0.00542763	0.99623	1.08472	1.05402	0.00528122	1.16115	1.09295	0.972028	-0.00538735	0.999913	1.62732	1.03063	0.00132732	1.05389	1.26626	1.05345	0.00395408	1.13251	1.44984	0.974449	-0.00785226	0.994752	2.19626
56.5511	2	2	EU	7	0.212378	0.863005	-0.0178488	0.890209	0.728131	1.01137	2.72904e-05	0.971936	0.379278	0.921619	-0.0107429	0.559395	0.954861	1.00191	-0.00138852	0.925196	0.516258	1.00467	-0.00207642	0.936202	0.981065	0.966223	-0.00542467	0.989305	0.819553	1.05929	0.00527494	1.16115	0.639962	0.966642	-0.00538444	0.994669	0.608797	1.03195	0.00132354	1.05389	0.598297	1.0574	0.0039477	1.13251	0.245724	0.966598	-0.00784998	0.98467	0.653336
0	3	3	EV	8	1.23157	0.845167	-0.017827	0.840752	0.787982	1.01139	2.48592e-05	0.971936	1.06939	0.910882	-0.0107307	0.505495	1.55406	1.00052	-0.00138952	0.925196	1.57865	1.0026	-0.00207832	0.936202	1.32713	0.9608	-0.00541974	0.98244	1.13594	1.06456	0.00526446	1.16115	0.692565	0.96126	-0.00537959	0.989452	2.23936	1.03327	0.00131724	1.05389	1.51661	1.06135	0.00393706	1.13251	0.843861	0.958749	-0.00784618	0.974689	1.11048
57.7934	4	4	EW	9	0.207704	0.827354	-0.0177965	0.794205	0.935846	1.01141	2.14554e-05	0.971936	2.05452	0.90016	-0.0107136	0.483061	1.2769	0.999132	-0.00139094	0.925196	1.34529	1.00052	-0.00208097	0.936202	0.809445	0.955384	-0.00541284	0.975636	1.07751	1.06982	0.00524979	1.16115	0.625878	0.955883	-0.00537279	0.984262	1.20095	1.03459	0.00130842	1.05389	1.20945	1.06528	0.00392216	1.13251	0.948369	0.950906	-0.00784085	0.96481	0.821258
0	5	5		10	1.11098	0.809576	-0.0177573	0.750397	0.555322	1.01143	1.70792e-05	0.971936	1.26137	0.889457	-0.0106916	0.473723	1.43293	0.99774	-0.00139275	0.925196	1.34481	0.998435	-0.00208439	0.936202	1.40293	0.949975	-0.00540397	0.968891	0.983309	1.07506	0.00523093	1.16115	1.62919	0.950515	-0.00536405	0.979099	0.79662	1.03589	0.00129708	1.05389	0.970804	1.06919	0.003903	1.13251	1.55219	0.943068	-0.007834	0.955031	0.85404
0	6	6		11	1.48383	0.791842	-0.0177094	0.709165	1.54756	1.01145	1.17305e-05	0.971936	1.05633	0.878778	-0.0106647	0.469837	0.947185	0.996347	-0.00139497	0.925196	1.25239	0.996348	-0.00208856	0.936202	2.84363	0.944576	-0.00539313	0.962206	1.34382	1.08028	0.00520788	1.16115	1.56638	0.945156	-0.00535337	0.973964	2.0516	1.03718	0.00128322	1.05389	1.21523	1.07308	0.00387959	1.13251	0.760383	0.935238	-0.00782563	0.945352	1.18852
0	7	7		12	0.844665	0.774161	-0.0176528	0.670359	0.866562	1.01146	5.40926e-06	0.971936	1.35776	0.868129	-0.0106329	0.468219	1.24516	0.99495	-0.00139759	0.925196	0.78238	0.994257	-0.0020935	0.936202	0.583792	0.93919	-0.00538031	0.955579	0.76212	1.08548	0.00518064	1.16115	0.76163	0.939809	-0.00534074	0.968856	0.898251	1.03846	0.00126684	1.05389	0.801383	1.07695	0.00385192	1.13251	0.536629	0.927417	-0.00781573	0.93577	1.11031
23.5545	8	8		13	0.262443	0.75654	-0.0175875	0.633836	0.749815	1.01146	-1.88445e-06	0.971936	0.515509	0.857514	-0.0105962	0.467545	0.869663	0.993551	-0.00140061	0.925196	0.464128	0.992161	-0.00209919	0.936202	0	0.933817	-0.00536553	0.949011	0.656525	1.09064	0.0051492	1.16115	0.703052	0.934475	-0.00532617	0.963774	0.411	1.03971	0.00124794	1.05389	0.55412	1.08078	0.00382	1.13251	0.202434	0.919607	-0.00780432	0.926285	1.03769
0	9	9		14	1.05207	0.738988	-0.0175135	0.599462	1.11218	1.01145	-1.01507e-05	0.971936	1.39147	0.846938	-0.0105546	0.467265	1.21849	0.992149	-0.00140404	0.925196	0.982678	0.990059	-0.00210564	0.936202	0.641307	0.928459	-0.00534877	0.9425	0.617008	1.09577	0.00511358	1.16115	1.39568	0.929157	-0.00530967	0.958719	0.681653	1.04095	0.00122653	1.05389	0.847514	1.08459	0.00378381	1.13251	1.01944	0.911809	-0.00779138	0.916897	1.58646
0	10	10		15	1.05239	0.721516	-0.0174307	0.567109	1.27122	1.01144	-1.93894e-05	0.971936	0.843855	0.836406	-0.0105081	0.467149	1.03987	0.990743	-0.00140787	0.925196	1.41406	0.98795	-0.00211285	0.936202	1.92451	0.92312	-0.00533004	0.936047	0.993548	1.10087	0.00507376	1.16115	1.30229	0.923856	-0.00529121	0.95369	0.758063	1.04217	0.00120259	1.05389	1.07694	1.08835	0.00374338	1.13251	0.858541	0.904025	-0.00777692	0.907603	1.22007
0	11	11		16	0.837652	0.70413	-0.0173393	0.53666	1.43435	1.01141	-2.96006e-05	0.971936	1.4966	0.825923	-0.0104568	0.4671	0.9232	0.989333	-0.0014121	0.925196	0.739358	0.985833	-0.00212082	0.936202	0.965228	0.9178	-0.00530934	0.92965	0.463559	1.10592	0.00502976	1.16115	0.653157	0.918575	-0.00527082	0.948688	1.12424	1.04336	0.00117613	1.05389	0.784852	1.09207	0.00369868	1.13251	0.753209	0.896256	-0.00776094	0.898404	1.95985
0	12	12		17	1.23741	0.68684	-0.0172391	0.508002	1.00142	1.01138	-4.07843e-05	0.971936	0.88745	0.815494	-0.0104005	0.46708	1.18755	0.987919	-0.00141674	0.925196	0.710024	0.983708	-0.00212955	0.936202	1.68661	0.912502	-0.00528667	0.923309	1.00387	1.11093	0.00498156	1.16115	0.29306	0.913315	-0.00524848	0.943712	1.07811	1.04452	0.00114715	1.05389	1.06352	1.09575	0.00364973	1.13251	0.50749	0.888504	-0.00774344	0.889299	0.640906
90.4634	13	13		18	0	0.669655	-0.0171302	0.48103	1.02519	1.01133	-5.29404e-05	0.971936	0.80182	0.805124	-0.0103394	0.467071	1.08738	0.9865	-0.00142177	0.925196	0.660859	0.981574	-0.00213903	0.936202	1.72664	0.907227	-0.00526203	0.917024	1.06968	1.11588	0.00492917	1.16115	0.701039	0.908079	-0.00522421	0.938763	1.18615	1.04565	0.00111565	1.05389	1.01842	1.09937	0.00359652	1.13251	0.634862	0.88077	-0.00772441	0.880285	0.787344
57.6389	14	14		19	0.066668	0.652582	-0.0170127	0.455645	0.858088	1.01127	-6.60691e-05	0.971936	0.482783	0.794817	-0.0102733	0.467068	1.28572	0.985075	-0.00142722	0.925196	1.99661	0.979429	-0.00214928	0.936202	3.12512	0.901978	-0.00523542	0.910794	1.07439	1.12078	0.00487259	1.16115	1.10591	0.902868	-0.00519799	0.933839	1.23278	1.04675	0.00108164	1.05389	1.76812	1.10294	0.00353905	1.13251	0.521826	0.873055	-0.00770386	0.871363	1.84787
190.175	15	15		20	0	0.635632	-0.0168864	0.431753	1.26171	1.0112	-8.01703e-05	0.971936	0.28098	0.784579	-0.0102024	0.467066	0.605262	0.983645	-0.00143306	0.925196	0.487506	0.977275	-0.00216029	0.936202	0.727528	0.896757	-0.00520683	0.904619	0.290685	1.12563	0.00481182	1.16115	1.0545	0.897683	-0.00516982	0.928941	0.85972	1.04781	0.0010451	1.05389	0.479992	1.10645	0.00347733	1.13251	0.0607406	0.865362	-0.00768179	0.862531	0.829377
202.215	16	16		21	0	0.618813	-0.0167514	0.409266	0.360011	1.01111	-9.5244e-05	0.971936	0.618783	0.774414	-0.0101266	0.467066	0.537881	0.982209	-0.00143931	0.925196	0.0695516	0.975109	-0.00217205	0.936202	0	0.891565	-0.00517628	0.898498	1.02367	1.13041	0.00474686	1.16115	0.843897	0.892529	-0.00513972	0.924068	0.514945	1.04884	0.00100604	1.05389	0.443173	1.10989	0.00341135	1.13251	0.121494	0.857692	-0.0076582	0.853789	0.276488
0	17	17		22	0.913321	0.602132	-0.0166077	0.388103	1.44418	1.01101	-0.00011129	0.971936	1.35497	0.764328	-0.0100459	0.467066	1.11347	0.980766	-0.00144596	0.925196	1.39677	0.97293	-0.00218457	0.936202	0.364393	0.886405	-0.00514375	0.892431	1.01051	1.13512	0.00467771	1.16115	1.37395	0.887405	-0.00510767	0.919222	1.22977	1.04982	0.000964464	1.05389	0.814664	1.11327	0.00334111	1.13251	0.731364	0.850046	-0.00763309	0.845135	0.970663
0	18	18		23	1.02028	0.5856	-0.0164553	0.368184	0.722037	1.01089	-0.000128309	0.971936	1.46985	0.754324	-0.00996025	0.467065	1.14876	0.979317	-0.00145302	0.925196	1.11803	0.970739	-0.00219785	0.936202	0.36482	0.881278	-0.00510925	0.886417	1.33783	1.13976	0.00460436	1.16115	0.740608	0.882314	-0.00507368	0.9144	0.840548	1.05077	0.000920367	1.05389	1.26225	1.11657	0.00326662	1.13251	1.34383	0.842427	-0.00760645	0.836569	1.24906
0	19	19		24	0.883366	0.569225	-0.0162941	0.349437	0.907049	1.01075	-0.0001463	0.971936	1.24949	0.744409	-0.00986975	0.467065	1.29077	0.97786	-0.00146047	0.925196	0.982721	0.968534	-0.00221189	0.936202	0.733281	0.876187	-0.00507278	0.880456	1.34451	1.14433	0.00452683	1.16115	0.956658	0.877258	-0.00503775	0.909604	1.39065	1.05166	0.00087375	1.05389	1.1188	1.1198	0.00318787	1.13251	0.92015	0.834834	-0.00757829	0.82809	1.2553
0	20	20		25	0.780848	0.553015	-0.0161243	0.331793	0.911182	1.0106	-0.000165267	0.971936	0.626451	0.734586	-0.00977437	0.467065	1.05682	0.976396	-0.00146833	0.925196	0.916785	0.966315	-0.0022267	0.936202	0.736622	0.871133	-0.00503434	0.874548	1.30572	1.14881	0.0044451	1.16115	1.06768	0.872239	-0.00499987	0.904833	1.243	1.05251	0.000824611	1.05389	0.86075	1.12295	0.00310486	1.13251	0.985842	0.827271	-0.00754861	0.819697	0.839744
137.783	21	21		26	0.0716836	0.536979	-0.0159459	0.315187	1.47808	1.01042	-0.000185523	0.971936	1.09697	0.724861	-0.00967436	0.467065	1.24348	0.974923	-0.00147647	0.925196	1.07163	0.964081	-0.00224276	0.936202	0.372944	0.866119	-0.00499447	0.868691	0.988893	1.15321	0.00435919	1.16115	0.540014	0.867259	-0.0049597	0.900088	1.25863	1.05331	0.000772768	1.05389	1.74807	1.12601	0.00301755	1.13251	0.498811	0.819737	-0.00751751	0.811389	0.850308
41.1217	22	22		27	0.108799	0.521126	-0.0157591	0.299557	0.93357	1.01022	-0.000207268	0.971936	0.759019	0.715239	-0.00956991	0.467065	0.83776	0.973443	-0.00148481	0.925196	0.360718	0.961829	-0.00226038	0.936202	0.754721	0.861145	-0.0049535	0.862885	0.680404	1.15753	0.0042691	1.16115	0.875347	0.86232	-0.00491701	0.895367	0.645756	1.05406	0.000718105	1.05389	0.613046	1.12898	0.00292589	1.13251	0.378066	0.812236	-0.00748505	0.803165	1.1486
0	23	23		28	0.734326	0.505463	-0.015564	0.284848	2.26649	1.01001	-0.00023046	0.971936	1.41706	0.705723	-0.0094611	0.467065	0.386993	0.971954	-0.00149332	0.925196	0.65644	0.959559	-0.00227965	0.936202	1.14327	0.856212	-0.00491154	0.857131	0.656449	1.16175	0.00417481	1.16115	1.43691	0.857426	-0.00487183	0.89067	1.19536	1.05475	0.000660647	1.05389	0.735357	1.13186	0.00282982	1.13251	1.27586	0.804768	-0.00745126	0.795024	1.30477
55.0158	24	24		29	0.147816	0.49	-0.0153609	0.271003	0.38051	1.00976	-0.000254882	0.971936	0.29701	0.696318	-0.00934848	0.467065	1.42535	0.970456	-0.00150188	0.925196	0.883612	0.957269	-0.00230118	0.936202	0.384517	0.851322	-0.00486931	0.851427	1.23796	1.16588	0.00407624	1.16115	0.445417	0.852578	-0.00482433	0.885999	1.20611	1.05538	0.000600473	1.05389	1.36976	1.13464	0.00272881	1.13251	0.514289	0.797334	-0.00741636	0.786966	1.02427
117.51	25	25		30	0.0747795	0.474744	-0.0151503	0.257973	0.962491	1.0095	-0.000280838	0.971936	0.120205	0.687027	-0.00923241	0.467065	0.972081	0.96895	-0.00151067	0.925196	0.521394	0.954956	-0.00232536	0.936202	0.389051	0.846473	-0.00482819	0.845774	1.45848	1.1699	0.0039729	1.16115	1.1278	0.847778	-0.00477479	0.881352	0.919483	1.05595	0.000536682	1.05389	0.315822	1.13731	0.00262201	1.13251	0.45539	0.789935	-0.00738102	0.77899	0.443515
0	26	26		31	0.752295	0.459702	-0.0149325	0.24571	0.386348	1.0092	-0.000308779	0.971936	1.02714	0.677854	-0.00911342	0.467065	0.939123	0.967435	-0.0015199	0.925196	0.821783	0.952617	-0.00235235	0.936202	3.51765	0.841665	-0.00478933	0.84017	0.893001	1.17382	0.00386411	1.16115	1.47208	0.843028	-0.00472363	0.876729	1.64407	1.05645	0.000468263	1.05389	1.59019	1.13988	0.00250841	1.13251	0.783595	0.782572	-0.0073457	0.771094	1.18834
191.844	27	27		32	0.0751496	0.444882	-0.0147076	0.234168	0.580353	1.00888	-0.000338739	0.971936	0.423403	0.668801	-0.00899154	0.467065	0.578058	0.96591	-0.00152957	0.925196	0.149494	0.95025	-0.00238217	0.936202	0	0.836894	-0.00475278	0.834615	0.783802	1.17763	0.00374983	1.16115	0.339675	0.838331	-0.0046709	0.872131	0.322343	1.05688	0.000395148	1.05389	0.714809	1.14233	0.00238794	1.13251	0.195853	0.775244	-0.00731043	0.763279	0.59428
0	28	28		33	0.755946	0.430289	-0.0144758	0.223304	2.13717	1.00852	-0.000370744	0.971936	1.21515	0.659872	-0.00886702	0.467065	0.761675	0.964375	-0.00153951	0.925196	0.901523	0.947852	-0.00241529	0.936202	0.784622	0.832158	-0.00471846	0.829109	1.29495	1.18132	0.00363013	1.16115	0.910027	0.833687	-0.00461659	0.867556	0.973789	1.05724	0.000316942	1.05389	0.956995	1.14465	0.00226056	1.13251	0.918412	0.767951	-0.00727568	0.755542	1.04503
59.8184	29	29		34	0	0.415932	-0.0142371	0.21308	1.38857	1.00814	-0.000404809	0.971936	0.557238	0.651068	-0.00873998	0.467065	1.00029	0.962831	-0.00154959	0.925196	1.15035	0.945419	-0.002452	0.936202	0.800683	0.827456	-0.00468631	0.823651	1.38672	1.18489	0.00350509	1.16115	0.812719	0.829098	-0.00456069	0.863006	1.04128	1.05751	0.00023339	1.05389	1.99983	1.14685	0.00212625	1.13251	0.735999	0.760692	-0.00724175	0.747884	1.52281
75.1394	30	30		35	0.30964	0.401817	-0.0139917	0.203458	0.398043	1.00771	-0.000441139	0.971936	0.435594	0.642393	-0.00861053	0.467065	1.19163	0.961276	-0.00155987	0.925196	0.69286	0.942947	-0.00249243	0.936202	0.804468	0.822785	-0.00465595	0.818241	0.985119	1.18833	0.00337485	1.16115	1.16602	0.824566	-0.00450318	0.858479	0.379168	1.0577	0.000144695	1.05389	1.59715	1.1489	0.00198513	1.13251	0.672314	0.753467	-0.00720872	0.740304	0.611392
138.083	31	31		36	0.117161	0.387951	-0.0137399	0.194401	0.201066	1.00725	-0.000480328	0.971936	0	0.633848	-0.00847897	0.467065	0.788963	0.959711	-0.00157052	0.925196	0.622288	0.940432	-0.00253694	0.936202	0.406366	0.818144	-0.00462639	0.812879	1.11039	1.19163	0.00323978	1.16115	1.06031	0.820093	-0.00444403	0.853977	1.05695	1.0578	5.13369e-05	1.05389	0.742946	1.15081	0.00183748	1.13251	0.271417	0.746274	-0.00717688	0.732801	1.08247
0	32	32		37	0.670072	0.37434	-0.013482	0.185878	0.810291	1.00675	-0.000523012	0.971936	0.760239	0.625436	-0.00834535	0.467065	1.06072	0.958135	-0.00158213	0.925196	0.626953	0.937871	-0.0025856	0.936202	1.22824	0.813532	-0.004598	0.807564	1.45142	1.19481	0.00309967	1.16115	0.592819	0.815679	-0.00438303	0.849498	1.47945	1.0578	-4.71999e-05	1.05389	1.0402	1.15258	0.00168317	1.13251	1.37067	0.739113	-0.00714616	0.725373	1.09058
0	33	33		38	1.30739	0.360989	-0.0132183	0.177855	1.42422	1.0062	-0.000569878	0.971936	0.508108	0.617158	-0.00820909	0.467065	1.5221	0.956546	-0.00159514	0.925196	1.41617	0.93526	-0.00263837	0.936202	0.821236	0.808948	-0.00457063	0.802295	1.3053	1.19783	0.00295493	1.16115	1.07141	0.811327	-0.00431968	0.845042	1.1658	1.0577	-0.000151054	1.05389	1.33665	1.15418	0.00152224	1.13251	0.824142	0.731982	-0.00711582	0.718021	0.78017
97.2501	34	34		39	0.0792645	0.347905	-0.0129491	0.170305	1.22426	1.00561	-0.000620838	0.971936	0.382243	0.609018	-0.00807002	0.467065	0.686161	0.954944	-0.00160973	0.925196	0.552666	0.932593	-0.00269509	0.936202	0.82477	0.80439	-0.0045448	0.797073	0.760155	1.20071	0.00280648	1.16115	0.597123	0.80704	-0.00425373	0.84061	0.778928	1.0575	-0.000260121	1.05389	0.669945	1.15562	0.00135436	1.13251	0.206578	0.724881	-0.00708548	0.710744	0
0	35	35		40	0.835168	0.335092	-0.0126748	0.163199	1.02133	1.00496	-0.000675563	0.971936	1.27872	0.601019	-0.00792839	0.467065	0.801521	0.953326	-0.00162608	0.925196	0.711119	0.929868	-0.00275597	0.936202	1.2385	0.799858	-0.00452041	0.791897	0.760983	1.20344	0.0026547	1.16115	1.91646	0.802821	-0.00418498	0.836201	1.09829	1.05718	-0.000373846	1.05389	1.00706	1.15689	0.00117958	1.13251	1.38213	0.717811	-0.00705479	0.70354	0.78438
98.5789	36	36		41	0.0820783	0.322557	-0.012396	0.156511	2.32627	1.00426	-0.000733072	0.971936	0.991509	0.593162	-0.0077849	0.467065	1.10635	0.951691	-0.00164404	0.925196	0.244915	0.92708	-0.00282068	0.936202	0	0.795349	-0.00449592	0.786766	1.60083	1.20602	0.00250026	1.16115	1.23788	0.798671	-0.00411322	0.831815	2.0285	1.05675	-0.000490538	1.05389	1.34634	1.15797	0.00099874	1.13251	0.356518	0.710772	-0.00702309	0.696409	0.973609
46.8578	37	37		42	0.0412184	0.310302	-0.012113	0.150216	0.42442	1.00349	-0.0007931	0.971936	0.530717	0.58545	-0.00763995	0.467065	0.753181	0.950038	-0.00166311	0.925196	1.80881	0.924226	-0.00288871	0.936202	0.42889	0.790866	-0.00447111	0.78168	1.41569	1.20844	0.00234386	1.16115	0.994877	0.794595	-0.0040387	0.827452	1.70369	1.0562	-0.000609512	1.05389	0.871491	1.15888	0.000811804	1.13251	0.645252	0.703765	-0.00699022	0.689351	1.14247
56.941	38	38		43	0.12455	0.298332	-0.0118263	0.144291	0.641234	1.00267	-0.000855721	0.971936	0.266944	0.577883	-0.00749402	0.467065	0.638698	0.948365	-0.00168329	0.925196	0.992708	0.921302	-0.00295988	0.936202	1.29597	0.786407	-0.00444672	0.776639	0.900977	1.21071	0.00218585	1.16115	0.125103	0.790595	-0.00396192	0.823112	0.841619	1.05553	-0.000731065	1.05389	0.745578	1.1596	0.000618549	1.13251	0.288532	0.696792	-0.00695621	0.682364	0.820779
0	39	39		44	0.924867	0.28665	-0.0115363	0.138715	1.07924	1.00178	-0.000921416	0.971936	0.472423	0.570462	-0.00734726	0.467065	1.37366	0.946671	-0.00170451	0.925196	0.834841	0.918305	-0.00303446	0.936202	0.872484	0.781972	-0.00442294	0.771642	1.31599	1.21282	0.00202661	1.16115	1.2646	0.786672	-0.00388305	0.818795	1.21264	1.05474	-0.000855402	1.05389	0.975296	1.16012	0.000418852	1.13251	0.656314	0.689853	-0.00692068	0.675447	0.828855
101.122	40	40		45	0.125995	0.27526	-0.0112438	0.133468	1.08113	1.00083	-0.000990075	0.971936	0.473249	0.563189	-0.00719901	0.467065	0.565095	0.944955	-0.00172686	0.925196	0.585661	0.915231	-0.00311328	0.936202	0.437005	0.777561	-0.00440065	0.766689	1.17652	1.21476	0.00186623	1.16115	1.14026	0.782829	-0.00380216	0.8145	1.16259	1.05382	-0.000982267	1.05389	1.02129	1.16043	0.000213117	1.13251	0.730431	0.682951	-0.00688331	0.668601	0.996364
0	41	41		46	1.58381	0.264164	-0.0109488	0.128528	1.31659	0.999801	-0.0010624	0.971936	0.892023	0.556065	-0.00704859	0.467065	0.614789	0.943217	-0.00174998	0.925196	1.01912	0.912077	-0.00319691	0.936202	1.33046	0.773171	-0.00437932	0.76178	1.49993	1.21655	0.0017046	1.16115	2.05876	0.779068	-0.00371946	0.810228	1.5233	1.05277	-0.00111159	1.05389	1.12678	1.16054	1.44097e-06	1.13251	1.18706	0.676087	-0.00684446	0.661825	0.842618
54.5386	42	42		47	0.213501	0.253363	-0.0106515	0.12388	1.54107	0.998701	-0.00113721	0.971936	0.893674	0.549092	-0.00689542	0.467065	1.27488	0.941455	-0.0017737	0.925196	0.765331	0.908836	-0.00328602	0.936202	0.444307	0.768802	-0.00435889	0.756914	1.66562	1.21817	0.00154228	1.16115	0.386007	0.775391	-0.0036341	0.805978	0.892001	1.0516	-0.00124287	1.05389	1.58275	1.16043	-0.000215445	1.13251	0.816826	0.669263	-0.00680398	0.655117	0.844177
168.845	43	43		48	0	0.242861	-0.0103524	0.119505	1.7943	0.997526	-0.00121197	0.971936	0.840684	0.542274	-0.00673988	0.467065	0.292717	0.939669	-0.00179773	0.925196	0	0.905503	-0.00338115	0.936202	0.452734	0.764453	-0.00433854	0.75209	0.670512	1.21963	0.0013788	1.16115	0.524438	0.771801	-0.00354564	0.801751	0.506908	1.05029	-0.00137604	1.05389	0.367518	1.16011	-0.000437822	1.13251	0.151193	0.66248	-0.00676149	0.648477	1.03223
67.0616	44	44		49	0.0874806	0.232659	-0.0100514	0.115387	1.8038	0.996277	-0.00128622	0.971936	0.563188	0.535613	-0.00658233	0.467065	1.34834	0.937859	-0.00182223	0.925196	0.783975	0.902071	-0.00348286	0.936202	0.45513	0.760125	-0.00431678	0.747309	1.20682	1.22093	0.00121392	1.16115	1.18755	0.768301	-0.00345534	0.797546	1.536	1.04884	-0.00151226	1.05389	1.34225	1.15956	-0.000666208	1.13251	1.59973	0.65574	-0.00671699	0.641904	1.38532
89.0634	45	45		50	0	0.222759	-0.00974933	0.111511	0.22703	0.994955	-0.00135823	0.971936	0.283536	0.52911	-0.00642346	0.467065	1.14646	0.936025	-0.00184768	0.925196	0.350885	0.898535	-0.00359112	0.936202	1.37653	0.75582	-0.00429247	0.74257	0.919854	1.22206	0.00104808	1.16115	0.398635	0.764891	-0.00336394	0.793363	0.622216	1.04726	-0.00165309	1.05389	0.605448	1.15877	-0.000899918	1.13251	0.0766165	0.649047	-0.00666968	0.635398	1.39661
174.295	46	46		51	0.0884316	0.213161	-0.00944677	0.107864	0.455283	0.993562	-0.00142565	0.971936	0.071075	0.522767	-0.0062639	0.467065	0.424769	0.934164	-0.00187443	0.925196	0.0879576	0.894887	-0.00370642	0.936202	0.920156	0.75154	-0.0042668	0.737872	0.903812	1.22302	0.000881979	1.16115	0.799418	0.761573	-0.00327238	0.789202	0.352259	1.04553	-0.00179967	1.05389	0.186507	1.15775	-0.0011392	1.13251	0.153646	0.642402	-0.0066196	0.628958	0.699314
162.226	47	47		52	0	0.203865	-0.00914415	0.104431	0.910567	0.992105	-0.00148869	0.971936	0.56931	0.516583	-0.00610432	0.467065	0.127303	0.932275	-0.00190215	0.925196	0.175915	0.89112	-0.00382759	0.936202	0	0.747287	-0.00424013	0.733216	0.866772	1.22382	0.000715837	1.16115	0.399709	0.758346	-0.00318163	0.785062	0.705599	1.04366	-0.00195137	1.05389	0.27976	1.15649	-0.00138335	1.13251	0.692174	0.635808	-0.00656728	0.622583	0.874142
60.5348	48	48		53	0.0445871	0.194872	-0.00884253	0.1012	1.14777	0.990586	-0.00154899	0.971936	0.430031	0.510557	-0.00594612	0.467065	1.41766	0.930359	-0.00193105	0.925196	0.799153	0.88723	-0.00395208	0.936202	0	0.74306	-0.0042131	0.7286	1.23018	1.22446	0.000549251	1.16115	0.806132	0.755209	-0.00309189	0.780945	0.629132	1.04163	-0.00210666	1.05389	1.6052	1.15499	-0.00163251	1.13251	0.464808	0.629268	-0.00651281	0.616273	0.176297
0	49	49		54	0.985176	0.18618	-0.00854253	0.0981589	1.84168	0.989008	-0.00160637	0.971936	1.15075	0.50469	-0.00578951	0.467065	0.902197	0.928413	-0.00196135	0.925196	0.889279	0.883215	-0.00407936	0.936202	0.929377	0.738861	-0.00418643	0.724025	0.800451	1.22492	0.000382411	1.16115	0.538286	0.752162	-0.00300296	0.776848	0.438041	1.03944	-0.00226466	1.05389	1.03889	1.15323	-0.00188542	1.13251	0.932665	0.622784	-0.00645592	0.610026	1.23783
91.1734	50	50		55	0.0449934	0.177786	-0.00824471	0.0952968	0.926581	0.987374	-0.00165952	0.971936	0.361625	0.498978	-0.00563466	0.467065	1.03936	0.926435	-0.00199357	0.925196	1.34525	0.879071	-0.00420935	0.936202	0.936339	0.734688	-0.00415919	0.71949	1.01412	1.22522	0.00021562	1.16115	1.08599	0.749203	-0.00291443	0.772774	1.07866	1.0371	-0.00242483	1.05389	1.76312	1.15121	-0.00214142	1.13251	0.626174	0.616357	-0.00639692	0.603843	0.355806
49.5042	51	51		56	0.135991	0.169689	-0.00794945	0.0926031	0.23338	0.98569	-0.00170778	0.971936	0.437199	0.49342	-0.00548157	0.467065	1.52917	0.924425	-0.00202711	0.925196	1.4455	0.874796	-0.00434145	0.936202	0	0.730543	-0.00413119	0.714995	1.02172	1.22535	4.89654e-05	1.16115	1.09412	0.746333	-0.00282662	0.768721	1.08674	1.03459	-0.00258682	1.05389	1.24668	1.14894	-0.00240056	1.13251	0.157519	0.60999	-0.00633634	0.597723	0.896177
93.3126	52	52		57	0	0.161887	-0.00765607	0.0900679	0.702435	0.983961	-0.00175047	0.971936	0.219316	0.488014	-0.00532966	0.467065	1.09422	0.922381	-0.00206239	0.925196	0.180941	0.870387	-0.00447612	0.936202	0.473221	0.726425	-0.00410342	0.71054	1.31231	1.22532	-0.000117754	1.16115	0.685213	0.743549	-0.00274063	0.764689	0.669822	1.03193	-0.00275123	1.05389	1.492	1.14641	-0.00266288	1.13251	0.474105	0.603684	-0.00627528	0.591665	1.62021
147.059	53	53		58	0.137681	0.154376	-0.00736537	0.0876818	1.65632	0.982191	-0.00178933	0.971936	0.664685	0.48276	-0.00517906	0.467065	0.83861	0.9203	-0.0021	0.925196	0.273886	0.865843	-0.00461117	0.936202	0.955072	0.722335	-0.00407644	0.706124	1.20818	1.22512	-0.000284602	1.16115	0.969428	0.74085	-0.00265806	0.760678	0.704011	1.02909	-0.00291701	1.05389	0.339256	1.14362	-0.00292777	1.13251	0.079738	0.59744	-0.00621437	0.585668	0.181462
148.99	54	54		59	0.0460423	0.147155	-0.00707811	0.0854361	0.47409	0.980383	-0.00182569	0.971936	0.370055	0.477656	-0.00502983	0.467065	0.309753	0.91818	-0.00213987	0.925196	0.183182	0.861165	-0.00474585	0.936202	0.958166	0.718272	-0.00405169	0.701746	0.786676	1.22475	-0.000450375	1.16115	0	0.738232	-0.00258036	0.756688	0.479783	1.02609	-0.00308236	1.05389	0.43746	1.14056	-0.00319504	1.13251	0.0799963	0.591256	-0.00615342	0.579732	0.546151
90.4931	55	55		60	0.0463656	0.140219	-0.00679468	0.0833225	0.71613	0.97854	-0.00185999	0.971936	0.447184	0.4727	-0.00488176	0.467065	0.623857	0.916019	-0.00218132	0.925196	0.646562	0.856352	-0.00488021	0.936202	0.482447	0.714231	-0.00402979	0.697407	1.71035	1.22422	-0.000613864	1.16115	0.979398	0.735688	-0.0025078	0.752719	0.939919	1.02293	-0.00324611	1.05389	0.783766	1.13723	-0.00346429	1.13251	0.483349	0.585133	-0.0060919	0.573856	0.549987
98.1842	56	56		61	0.0465434	0.133564	-0.00651521	0.0813332	0.718876	0.976663	-0.00189319	0.971936	0.524464	0.467892	-0.00473452	0.467065	0.671364	0.913817	-0.00222394	0.925196	0.462939	0.851405	-0.00501294	0.936202	0.484297	0.710211	-0.00400999	0.693106	1.59858	1.22352	-0.000774502	1.16115	0.841501	0.733215	-0.0024386	0.748771	0.771508	1.0196	-0.00340767	1.05389	0.737691	1.13363	-0.00373444	1.13251	0.323468	0.579072	-0.0060297	0.568039	1.47409
0	57	57		62	1.02784	0.127187	-0.00624027	0.079461	1.92143	0.974753	-0.00192694	0.971936	0.599915	0.463231	-0.00458871	0.467065	0.582197	0.911571	-0.0022668	0.925196	1.95104	0.846326	-0.00514391	0.936202	0.48481	0.706212	-0.0039886	0.688843	0.835112	1.22267	-0.000930961	1.16115	0.421196	0.73081	-0.0023723	0.744844	0.915728	1.01611	-0.00356469	1.05389	1.38015	1.12976	-0.00400328	1.13251	1.054	0.573074	-0.0059671	0.562282	0.921134
57.7548	58	58		63	0.190456	0.121082	-0.00597031	0.0776989	2.20869	0.972809	-0.0019619	0.971936	0	0.458714	-0.00444558	0.467065	1.05375	0.909283	-0.00230953	0.925196	1.42361	0.841118	-0.0052732	0.936202	0.495438	0.702235	-0.00396359	0.684617	1.51451	1.22166	-0.00108305	1.16115	0.143476	0.728469	-0.00230989	0.740937	1.58346	1.01247	-0.00371558	1.05389	1.71418	1.12562	-0.00426941	1.13251	0.662645	0.567138	-0.0059048	0.556583	0.753061
39.9528	59	59		64	1.00222	0.115245	-0.00570564	0.0760405	0	0.97083	-0.00199566	0.971936	1.30335	0.454339	-0.00430486	0.467065	0.50308	0.906953	-0.00235041	0.925196	0.378848	0.835781	-0.00539929	0.936202	0	0.698286	-0.00393326	0.680429	1.27353	1.22051	-0.0012298	1.16115	0.573871	0.726189	-0.00225091	0.737051	0.0873983	1.00868	-0.00385989	1.05389	1.20849	1.12122	-0.00453096	1.13251	0.828049	0.561264	-0.00584233	0.550942	0.376507
33.9766	60	60		65	0.286287	0.109669	-0.00544661	0.0744796	1.22827	0.968818	-0.00202882	0.971936	0.076699	0.450104	-0.00416497	0.467065	1.01018	0.904583	-0.00238963	0.925196	0.569505	0.83032	-0.00552146	0.936202	0.496483	0.694371	-0.00389624	0.676277	0.975329	1.2192	-0.00137054	1.16115	1.15167	0.723966	-0.00219433	0.733185	1.70534	1.00476	-0.00399813	1.05389	1.31225	1.11656	-0.00478852	1.13251	1.41182	0.555453	-0.00578052	0.545358	1.69985
43.6349	61	61		66	0	0.104349	-0.00519372	0.0730105	1.23701	0.966773	-0.00206123	0.971936	2.09255	0.446009	-0.00402495	0.467065	0.785388	0.902175	-0.00242689	0.925196	1.91663	0.824739	-0.00564034	0.921827	0.500014	0.690495	-0.00385486	0.672161	1.26505	1.21777	-0.00150556	1.16115	0.724009	0.721799	-0.00214107	0.72934	0.82595	1.00069	-0.0041309	1.04343	1.42343	1.11164	-0.00504129	1.13251	0.585275	0.549703	-0.00571894	0.53983	0.570013
96.0247	62	62		67	0.192307	0.0992792	-0.0049475	0.0716279	0.247519	0.964695	-0.00209411	0.971936	0.154562	0.442054	-0.0038853	0.467065	0.60074	0.89973	-0.00246232	0.925196	0.573828	0.819041	-0.00575467	0.907682	0.500252	0.686662	-0.00381187	0.668082	1.00287	1.2162	-0.00163612	1.16115	1.16041	0.719683	-0.00209128	0.725514	1.03403	0.996496	-0.00425793	1.03308	1.0672	1.10648	-0.00528768	1.13251	0.585553	0.544015	-0.00565678	0.534359	0.950472
77.4049	63	63		68	0.0962328	0.094452	-0.00470812	0.0703266	2.97764	0.962584	-0.00212801	0.971936	0.542189	0.438238	-0.0037465	0.467065	0.694054	0.89725	-0.00249616	0.925196	0.86241	0.813232	-0.00586394	0.893764	2.00266	0.682872	-0.00376811	0.664039	1.12502	1.2145	-0.00176218	1.16115	1.16137	0.717615	-0.00204503	0.721709	0.678931	0.992177	-0.00437854	1.02283	1.73226	1.10107	-0.00552812	1.13251	1.25651	0.53839	-0.00559376	0.528942	0.951257
189.727	64	64		69	0.0481224	0.0898606	-0.00447576	0.0691018	0	0.960439	-0.0021621	0.971936	0.232064	0.43456	-0.00360909	0.467065	0.601311	0.894738	-0.00252867	0.925196	0.382915	0.807315	-0.00596846	0.880069	0.500727	0.679126	-0.00372404	0.660031	0.520471	1.21267	-0.00188323	1.16115	0.435024	0.715592	-0.00200197	0.717924	0.531198	0.987741	-0.00449279	1.01268	0.202985	1.09542	-0.00576334	1.13251	0.167221	0.532828	-0.00553017	0.523581	0.570825
52.4022	65	65		70	0.14487	0.0854981	-0.00425056	0.0679491	0.497234	0.95826	-0.0021965	0.971936	0.933039	0.431019	-0.00347346	0.467065	0.649748	0.892194	-0.00255948	0.925196	0.288186	0.801296	-0.00606863	0.866593	0	0.675423	-0.00368152	0.656058	0.723946	1.21073	-0.00199918	1.16115	0.582051	0.71361	-0.00196158	0.714158	1.39674	0.983193	-0.00460212	1.00263	0.612093	1.08955	-0.00599473	1.13251	0.335606	0.52733	-0.00546572	0.518275	0.572812
100.371	66	66		71	0.242803	0.0813572	-0.00403243	0.0668642	0.50002	0.956046	-0.00223246	0.971936	0.0780589	0.427613	-0.00333958	0.467065	0.606786	0.889619	-0.0025893	0.925196	0.483002	0.795179	-0.00616533	0.853333	0	0.671762	-0.00364152	0.65212	1.38069	1.20868	-0.00211088	1.16115	1.17209	0.711668	-0.00192419	0.710412	0.954404	0.978538	-0.00470753	0.992686	0.872078	1.08344	-0.00622331	1.13251	0.421858	0.521897	-0.00540062	0.513021	0
106.312	67	67		72	0.097332	0.0774308	-0.00382135	0.0658432	1.50332	0.953794	-0.00227021	0.971936	0.62661	0.424339	-0.00320733	0.467065	0.842564	0.887015	-0.0026193	0.925196	0.67864	0.788967	-0.00625744	0.840286	1.01277	0.668139	-0.00360531	0.648217	1.13787	1.20651	-0.00221833	1.16115	0.733231	0.709761	-0.00188995	0.706686	0.776616	0.973779	-0.0048093	0.982837	0.873972	1.0771	-0.00644908	1.13251	0.253665	0.516529	-0.0053343	0.507822	0.962122
0	68	68		73	0.880011	0.0737121	-0.00361727	0.0648822	1.00458	0.951505	-0.00230969	0.971936	0.94253	0.421198	-0.00307647	0.467065	0.703642	0.88438	-0.00265013	0.925196	0.971363	0.782666	-0.00634354	0.827448	1.01516	0.664549	-0.00357466	0.644348	0.935632	1.20424	-0.00232136	1.16115	0.587972	0.707887	-0.00185847	0.70298	0.358781	0.96892	-0.00490695	0.973086	0.669761	1.07054	-0.00667121	1.13251	1.44338	0.511228	-0.00526638	0.502675	0.964398
79.1829	69	69		74	0.0976521	0.0701941	-0.00341997	0.0639777	1.50826	0.949175	-0.00235008	0.971936	0.235457	0.418186	-0.00294703	0.467065	0.751149	0.881715	-0.00268079	0.925196	0.680872	0.776282	-0.00642379	0.814816	0.508049	0.660988	-0.00354985	0.640513	1.03895	1.20187	-0.00241893	1.16115	0.147129	0.706043	-0.00183013	0.699292	1.01997	0.963967	-0.00499899	0.963431	0.566886	1.06376	-0.00688722	1.13251	0.508998	0.505997	-0.00519635	0.49758	0.77223
0	70	70		75	1.08127	0.06687	-0.00322923	0.0631264	0.25235	0.946804	-0.00239136	0.971936	0.709893	0.415303	-0.00281844	0.467065	0.565424	0.879019	-0.0027112	0.925196	1.07352	0.76982	-0.00649866	0.802386	0.510015	0.657448	-0.00353103	0.636712	0.509595	1.1994	-0.0025112	1.16115	1.03536	0.704226	-0.0018036	0.695625	0.0899753	0.958924	-0.00508507	0.953873	0.621285	1.05677	-0.00709621	1.13251	1.1088	0.500837	-0.00512387	0.492536	1.35857
85.0893	71	71		76	0.0988806	0.0637335	-0.0030449	0.0623252	0.509079	0.944392	-0.00243429	0.971936	0.238419	0.412549	-0.00269054	0.467065	0.760598	0.876292	-0.00274213	0.925196	0.984489	0.763286	-0.00656927	0.790155	0	0.653923	-0.0035192	0.632944	0.969189	1.19685	-0.00259949	1.16115	0.893876	0.702435	-0.00177851	0.691976	0.606552	0.953798	-0.00516594	0.944409	0.887877	1.04957	-0.00729781	1.11547	0.60216	0.49575	-0.00504915	0.487544	1.37036
198.075	72	72		77	0.049498	0.060778	-0.00286702	0.0615712	0	0.941935	-0.00247991	0.971936	1.11551	0.409922	-0.0025635	0.467065	0.570996	0.873534	-0.00277403	0.925196	0.0984654	0.756683	-0.0066361	0.77812	0	0.650407	-0.00351543	0.629209	0.329051	1.19421	-0.00268399	1.16115	1.19472	0.700669	-0.00175483	0.688347	0.394341	0.948594	-0.0052422	0.935039	0.104394	1.04217	-0.00749089	1.09869	0.172001	0.490739	-0.00497269	0.482603	0.391429
0	73	73		78	1.24276	0.0579973	-0.00269543	0.0608615	0.765649	0.939431	-0.00252768	0.971936	0.558587	0.407422	-0.00243718	0.467065	0.810195	0.870744	-0.0028071	0.925196	1.67936	0.750015	-0.00669986	0.766278	0	0.646889	-0.00352118	0.625507	1.09655	1.19148	-0.00276449	1.16115	0.597502	0.698925	-0.00173251	0.684736	1.03555	0.943316	-0.00531408	0.925762	0.785688	1.03459	-0.00767532	1.08216	0.948275	0.485805	-0.00489522	0.477711	1.17603
191.476	74	74		79	0.0500486	0.0553852	-0.00252987	0.0601935	0.257672	0.936879	-0.00257749	0.971936	0.482706	0.405047	-0.00231172	0.467065	0.62538	0.86792	-0.00284068	0.925196	0	0.743284	-0.00676037	0.754626	0.52077	0.643361	-0.00353622	0.621838	0.918017	1.18868	-0.00284039	1.16115	0.301625	0.697203	-0.00171188	0.681145	0.368103	0.937967	-0.00538191	0.916577	0.0527776	1.02683	-0.00785063	1.06588	0	0.480948	-0.00481812	0.472869	0.197891
82.5129	75	75		80	0	0.0529357	-0.00237003	0.0595649	1.54683	0.934275	-0.00262936	0.971936	0.967519	0.402798	-0.00218756	0.467065	1.59213	0.865062	-0.00287531	0.925196	0.398448	0.736495	-0.00681852	0.743161	0.521039	0.639814	-0.0035596	0.618201	1.3604	1.1858	-0.00291233	1.16115	0.754451	0.6955	-0.00169434	0.677572	1.04605	0.932553	-0.0054471	0.907483	1.0054	1.01889	-0.0080172	1.04984	0.174004	0.476168	-0.00474191	0.468077	0.989967
53.1331	76	76		81	0.100397	0.0506432	-0.00221585	0.0589732	0.775329	0.931619	-0.002684	0.971936	0.969916	0.400672	-0.00206414	0.467065	0.869097	0.862169	-0.00291176	0.925196	0.899727	0.729648	-0.00687365	0.731879	0	0.63624	-0.00358878	0.614595	1.30048	1.18286	-0.00298124	1.16115	0.907584	0.693813	-0.00168029	0.674018	1.29652	0.927074	-0.00551024	0.89848	2.02055	1.0108	-0.00817585	1.03405	1.22279	0.471464	-0.00466686	0.463332	1.39137
0	77	77		82	0.604518	0.0485022	-0.00206714	0.0584164	1.81509	0.928906	-0.00274237	0.971936	1.05258	0.398669	-0.0019411	0.467065	0.821979	0.859238	-0.00294973	0.925196	0.80137	0.722749	-0.00692504	0.720778	0.52331	0.632635	-0.00362228	0.611022	0.4601	1.17984	-0.00304756	1.16115	1.36545	0.692138	-0.00166995	0.670483	0.153868	0.921533	-0.00557146	0.889565	0.42481	1.00254	-0.00832629	1.01849	0.787305	0.466834	-0.0045932	0.458636	0.59657
170.843	78	78		83	0	0.0465071	-0.00192392	0.0578923	0.258995	0.926133	-0.00280355	0.971936	0.890316	0.39679	-0.00181841	0.467065	0.193116	0.856269	-0.00298914	0.925196	0.300216	0.715799	-0.0069732	0.709855	1.04689	0.628994	-0.00365922	0.607479	0.775238	1.17676	-0.00311186	1.16115	0	0.690472	-0.00166389	0.666966	0.338905	0.915931	-0.00563092	0.880739	0.106097	0.994145	-0.0084695	1.00317	0.174808	0.462277	-0.00452141	0.453988	1.19345
56.4338	79	79		84	0.100692	0.0446526	-0.00178602	0.057399	1.55521	0.923298	-0.00286668	0.971936	0.0809289	0.395032	-0.00169624	0.467065	1.01709	0.853259	-0.00302979	0.925196	1.10268	0.708803	-0.00701801	0.699107	0.523864	0.625316	-0.00369759	0.603968	1.49513	1.17362	-0.00317438	1.16115	0.455125	0.688809	-0.00166262	0.663468	1.61209	0.910271	-0.00568861	0.872001	1.2779	0.985607	-0.00860533	0.988079	0.437369	0.457791	-0.00445124	0.449386	0.796268
99.8971	80	80		85	0.151067	0.0429333	-0.00165326	0.0569347	0.777758	0.920399	-0.00293168	0.971936	0.404723	0.393397	-0.00157486	0.467065	0.774682	0.850209	-0.00307192	0.925196	1.10289	0.701764	-0.00705945	0.688532	0	0.621599	-0.00373757	0.600488	1.26216	1.17041	-0.00323572	1.16115	1.06368	0.687145	-0.00166609	0.659988	1.26946	0.904555	-0.00574425	0.86335	0.744482	0.976937	-0.00873317	0.973215	0.0874907	0.453374	-0.00438304	0.444831	0.597317
117.003	81	81		86	0.0506006	0.0413444	-0.00152549	0.0564978	0.260513	0.917435	-0.00299747	0.971936	0.162677	0.391882	-0.00145455	0.467065	0.194248	0.847115	-0.00311611	0.925196	0.503294	0.694686	-0.00709773	0.678125	0	0.61784	-0.00377955	0.597038	0.86456	1.16715	-0.0032961	1.16115	0.762379	0.685476	-0.00167382	0.656527	0.776217	0.898784	-0.00579814	0.854784	0.213439	0.968143	-0.00885383	0.958574	0.0879162	0.449024	-0.00431706	0.440323	1.60259
57.2518	82	82		87	0.203241	0.0398807	-0.00140272	0.0560866	1.30796	0.914404	-0.00306333	0.971936	0.817569	0.390487	-0.00133559	0.467065	1.51702	0.843976	-0.00316256	0.925196	1.31601	0.68757	-0.00713273	0.667886	2.11478	0.614039	-0.00382283	0.593619	1.29484	1.16382	-0.00335585	1.16115	1.53261	0.683796	-0.0016848	0.653083	1.18671	0.892959	-0.00585137	0.846303	1.07429	0.959232	-0.00896777	0.944153	0.883687	0.444739	-0.00425347	0.43586	1.00451
56.3947	83	83		88	0.0509747	0.0385373	-0.00128479	0.0556995	1.04976	0.911308	-0.00313004	0.971936	0.0819396	0.38921	-0.00121843	0.467065	1.12812	0.840789	-0.00321148	0.925196	0.608417	0.680421	-0.00716533	0.65781	1.06081	0.610195	-0.00386604	0.590229	0.999268	1.16044	-0.00341518	1.16115	0.614412	0.682105	-0.001699	0.649658	1.00185	0.887081	-0.00590538	0.837907	1.02348	0.950209	-0.00907586	0.929949	0.620849	0.440516	-0.00419336	0.431442	0.403106
116.315	84	84		89	0	0.0373095	-0.00117155	0.0553352	0.525235	0.908144	-0.00319705	0.971936	0.656782	0.38805	-0.00110261	0.467065	0.58843	0.837552	-0.00326273	0.925196	0.60883	0.67324	-0.00719646	0.647897	1.5923	0.606307	-0.0039089	0.58687	1.10699	1.15699	-0.00347401	1.16115	1.2312	0.680398	-0.00171594	0.64625	0.876747	0.881148	-0.00596084	0.829593	0.592234	0.941082	-0.00917791	0.915959	0.443131	0.436351	-0.0041374	0.427069	2.01892
87.0444	85	85		90	0.0511324	0.0361927	-0.00106278	0.0549924	1.053	0.904913	-0.00326491	0.971936	0.246579	0.387005	-0.000987163	0.467065	1.18117	0.834263	-0.00331607	0.925196	0.713033	0.666029	-0.007226	0.638141	0.532047	0.602378	-0.00394959	0.583539	1.62642	1.15349	-0.00353216	1.16115	0.154078	0.678672	-0.00173455	0.642861	1.16264	0.875158	-0.00601753	0.821363	0.485823	0.931856	-0.0092735	0.902179	0.71161	0.43224	-0.00408577	0.422741	1.01088
66.6358	86	86		91	0	0.0351825	-0.000958338	0.0546697	1.32612	0.901614	-0.00333464	0.971936	0.580491	0.386075	-0.000872203	0.467065	0.891899	0.830919	-0.00337161	0.925196	1.64273	0.658788	-0.00725405	0.628543	0	0.598409	-0.00398821	0.580239	1.13955	1.14993	-0.00358974	1.16115	1.08818	0.676928	-0.00175441	0.639489	0.663534	0.869112	-0.00607497	0.813213	1.25272	0.922537	-0.00936273	0.888607	0.537035	0.428178	-0.00403832	0.418456	0.814766
0	87	87		92	0.56745	0.0342747	-0.000858005	0.054366	0.265347	0.898243	-0.00340618	0.971936	0.663608	0.38526	-0.000758157	0.467065	0.346736	0.827519	-0.00342973	0.925196	0.102526	0.651521	-0.00727919	0.619098	0.536283	0.594402	-0.00402444	0.576967	0.49288	1.14631	-0.00364716	1.16115	0.931829	0.675164	-0.00177436	0.636135	0.410605	0.863008	-0.00613306	0.805145	0.326098	0.913132	-0.00944553	0.875239	0.447737	0.424162	-0.00399445	0.414215	0.203786
41.0753	88	88		93	0.10428	0.0334651	-0.0007618	0.0540802	1.88176	0.894801	-0.00347923	0.971936	0.58753	0.384559	-0.000645098	0.467065	1.30503	0.824059	-0.0034902	0.925196	0.830808	0.644231	-0.00730109	0.609804	1.6276	0.590361	-0.00405818	0.573724	1.2191	1.14263	-0.00370458	1.16115	1.41561	0.673379	-0.00179431	0.632798	1.70176	0.856846	-0.00619202	0.797157	1.60001	0.903648	-0.00952249	0.862072	1.27009	0.420188	-0.00395357	0.410016	1.44519
58.7917	89	89		94	0.105103	0.0327497	-0.000669785	0.0538112	0.541117	0.891284	-0.00355428	0.971936	0.506847	0.38397	-0.000533137	0.467065	1.92508	0.820538	-0.00355207	0.925196	1.36111	0.63692	-0.0073195	0.60066	1.09363	0.586287	-0.00408884	0.570509	1.3172	1.1389	-0.00376157	1.16115	0.475065	0.671575	-0.00181476	0.629479	1.52001	0.850624	-0.00625157	0.789248	1.27792	0.894089	-0.00959473	0.849103	0.547837	0.416254	-0.0039155	0.40586	1.66439
42.1363	90	90		95	0	0.0321241	-0.000582038	0.053558	1.62581	0.887692	-0.00363158	0.971936	0.338409	0.383492	-0.000422497	0.467065	1.16478	0.816954	-0.00361463	0.925196	0.838632	0.629593	-0.00733388	0.591662	0.547642	0.582184	-0.00411567	0.567322	0.965388	1.13511	-0.003818	1.16115	0.317189	0.66975	-0.00183574	0.626178	1.19672	0.844342	-0.00631183	0.781417	1.05674	0.88446	-0.00966283	0.836329	0.823913	0.412356	-0.00388018	0.401747	0.624308
155.264	91	91		96	0	0.0315842	-0.000498575	0.0533197	0.812701	0.88402	-0.00371113	0.971936	0.422907	0.383124	-0.000313199	0.467065	0.758989	0.813308	-0.0036776	0.916218	0.418689	0.622254	-0.00734428	0.582808	0.547506	0.578057	-0.00413785	0.564164	0.722934	1.13126	-0.00387391	1.16115	0.158555	0.667903	-0.00185753	0.622893	0.548306	0.838	-0.00637245	0.773665	0.332923	0.874765	-0.00972685	0.823747	0.365686	0.408492	-0.00384783	0.397675	0.416102
55.2932	92	92		97	0.158072	0.0311255	-0.000419451	0.0530954	0.542548	0.880268	-0.00379341	0.971936	0.763129	0.382865	-0.000205185	0.467065	0.962813	0.809599	-0.00374073	0.907326	1.04921	0.614906	-0.00735076	0.574096	0.548261	0.573911	-0.00415354	0.561033	1.25404	1.12736	-0.00392887	1.16115	0.793869	0.666034	-0.00188062	0.619626	1.1007	0.831598	-0.00643231	0.765989	0.946249	0.865007	-0.00978706	0.811354	0.457738	0.404659	-0.00381844	0.393644	0.833352
58.1401	93	93		98	0	0.0307438	-0.000344711	0.0528843	0.271458	0.876433	-0.0038783	0.971936	0.339022	0.382713	-9.86591e-05	0.467065	1.11628	0.805827	-0.0038038	0.898522	1.04993	0.607554	-0.00735312	0.565523	1.09727	0.569752	-0.0041639	0.55793	1.45475	1.12341	-0.00398295	1.16115	0.635527	0.664141	-0.00190542	0.616376	1.19888	0.825136	-0.00649096	0.758389	1.05865	0.855192	-0.00984316	0.799148	0.642184	0.400855	-0.00379167	0.389654	1.25088
47.8059	94	94		99	0.211538	0.0304347	-0.0002743	0.0526856	1.90862	0.872511	-0.00396553	0.971936	0.765934	0.382667	5.63992e-06	0.467065	1.17038	0.801992	-0.0038662	0.889802	0.947868	0.600201	-0.00735218	0.557088	1.10055	0.565584	-0.00416945	0.554854	1.16983	1.1194	-0.00403647	1.16115	1.43581	0.662223	-0.00193205	0.613143	0.778891	0.818616	-0.00654846	0.750865	1.28601	0.845323	-0.00989481	0.787126	0.551305	0.397075	-0.00376758	0.385705	1.46582
149.056	95	95		100	0.0530698	0.0301938	-0.000208077	0.0524987	0.273226	0.868501	-0.0040539	0.971936	0.34123	0.382724	0.000106785	0.467065	0.765504	0.798095	-0.00392691	0.881168	0.633424	0.59285	-0.00734898	0.548788	1.10441	0.561414	-0.00417011	0.551805	1.35242	1.11533	-0.00408916	1.16115	1.12101	0.660276	-0.00196123	0.609927	0.683554	0.81204	-0.00660412	0.743415	0.728645	0.835404	-0.00994158	0.775285	0.184413	0.393319	-0.00374583	0.381796	0.419674
51.9527	96	96		101	0	0.0300171	-0.000146058	0.0523227	1.36762	0.864403	-0.00414353	0.971936	0.512405	0.38288	0.000204525	0.467065	1.58622	0.794139	-0.0039854	0.872617	1.27035	0.585504	-0.0073439	0.540621	0.552811	0.557246	-0.00416573	0.548783	1.17522	1.11122	-0.00414073	1.16115	0.320183	0.658299	-0.00199261	0.606728	1.30651	0.805409	-0.0066582	0.736039	1.06671	0.825441	-0.00998302	0.763621	0.553843	0.389583	-0.00372657	0.377926	0.420134
34.637	97	97		102	0	0.0299004	-8.8123e-05	0.052157	2.1982	0.860214	-0.00423373	0.971936	0.42842	0.383132	0.000299125	0.467065	0.666059	0.790125	-0.00404158	0.864149	0.743317	0.578163	-0.0073373	0.532585	0.554644	0.553084	-0.00415646	0.545787	1.56066	1.10705	-0.0041913	1.16115	1.44721	0.656291	-0.00202552	0.603546	2.66801	0.798724	-0.00671089	0.728736	1.63573	0.81544	-0.0100195	0.752133	0.92706	0.385865	-0.00370944	0.374095	1.05382
128.279	98	98		103	0	0.0298396	-3.39658e-05	0.0520012	0.274602	0.855935	-0.00432392	0.971936	0.257211	0.383477	0.000390904	0.467065	0.615282	0.786056	-0.00409536	0.855763	0.424409	0.57083	-0.00732903	0.524678	0.554987	0.548935	-0.0041422	0.542818	0.799611	1.10284	-0.00424118	1.16115	0.803608	0.654248	-0.00206025	0.60038	0.555797	0.791987	-0.00676182	0.721506	0.732313	0.805404	-0.0100514	0.740818	0.370682	0.382163	-0.00369417	0.370304	0.843575
110.225	99	99		104	0	0.0298312	1.64696e-05	0.0518544	1.10249	0.851566	-0.00441425	0.971936	0.603252	0.383913	0.000480019	0.467065	0.926871	0.781935	-0.00414687	0.847459	0.532485	0.563505	-0.00731919	0.516898	0.557052	0.544802	-0.00412234	0.539875	1.38693	1.09857	-0.00429074	1.16115	0.16132	0.652169	-0.00209706	0.597231	1.28345	0.785201	-0.00681084	0.714348	0.848512	0.795338	-0.0100789	0.729673	0.838069	0.378476	-0.00368101	0.36655	1.48387
182.689	100	100		105	0.0535453	0.0298714	6.33739e-05	0.0517164	0.827022	0.847107	-0.004503	0.971936	0.603363	0.384436	0.000566858	0.467065	0.360231	0.777763	-0.00419611	0.839235	0.106517	0.556192	-0.00730771	0.509242	0.557154	0.540692	-0.00409567	0.536957	0.735673	1.09425	-0.00434006	1.16115	0.322698	0.650053	-0.00213463	0.594099	0.327966	0.778367	-0.00685681	0.707261	0.0564649	0.785248	-0.0101014	0.718696	0.279098	0.374801	-0.00366931	0.362835	0.211717
115.702	101	101		106	0	0.0299569	0.000107102	0.0515864	0.828679	0.842561	-0.00458887	0.949253	0.0862442	0.385045	0.00065094	0.467065	1.23939	0.773544	-0.00424342	0.831091	0.961637	0.54889	-0.00729499	0.501709	0.55827	0.536613	-0.00406096	0.534066	0.647479	1.08989	-0.00439001	1.15241	2.26665	0.6479	-0.0021722	0.590983	0.493427	0.771488	-0.0068992	0.700243	1.19097	0.775137	-0.010119	0.707884	0.466094	0.371137	-0.00365896	0.359158	1.27285
102.915	102	102		107	0.107372	0.0300846	0.00014792	0.0514641	0.829194	0.837931	-0.00467125	0.927744	0.691246	0.385737	0.000731786	0.467065	1.81104	0.769277	-0.00428907	0.823026	1.06903	0.541602	-0.00728091	0.494296	0	0.532573	-0.00401891	0.531199	0.962248	1.08547	-0.00444055	1.14373	0.808865	0.645709	-0.00220889	0.587883	1.05514	0.76457	-0.00693797	0.693296	1.19171	0.765011	-0.0101321	0.697235	0.840424	0.367482	-0.00364995	0.355517	1.48804
102.613	103	103		108	0.161214	0.0302517	0.000185852	0.051349	2.49276	0.833221	-0.00474705	0.907347	0.431907	0.386508	0.000809326	0.467065	0.619907	0.764966	-0.00433364	0.815039	0.641399	0.534329	-0.00726486	0.487003	0	0.528578	-0.0039707	0.528358	1.3017	1.08101	-0.00449113	1.13512	0.971578	0.643483	-0.00224401	0.5848	0.494212	0.757614	-0.00697337	0.686417	0.510579	0.754874	-0.0101403	0.686745	0.560203	0.363837	-0.00364151	0.351914	1.48948
60.6475	104	104		109	0.0540282	0.0304554	0.000221001	0.0512406	0.27816	0.828439	-0.00481528	0.888005	0.695652	0.387355	0.00088411	0.467065	0.623255	0.76061	-0.00437687	0.80713	1.18332	0.527073	-0.00724612	0.479826	0	0.524633	-0.00391836	0.525542	1.24061	1.07649	-0.00454025	1.12657	1.14126	0.641222	-0.0022775	0.581732	0.928636	0.750624	-0.00700504	0.679607	1.19931	0.744732	-0.0101428	0.676414	0.845782	0.360199	-0.00363294	0.348347	0.854506
73.3714	105	105		110	0.163625	0.0306928	0.000253351	0.0511386	0.280803	0.823593	-0.00487629	0.869663	0.0876731	0.388275	0.000956969	0.467065	0.891421	0.756213	-0.00441847	0.799297	1.08607	0.519838	-0.00722383	0.472764	1.13504	0.520742	-0.00386316	0.52275	0.931894	1.07193	-0.00458713	1.11809	0.164351	0.638928	-0.00230956	0.578681	0.501602	0.743605	-0.00703232	0.672864	1.73179	0.734591	-0.010139	0.666238	0.56858	0.356571	-0.00362409	0.344816	0.215656
37.3176	106	106		111	0.273913	0.0309612	0.000282918	0.0510427	0	0.818689	-0.00493017	0.85227	0.176121	0.389268	0.00102758	0.467065	1.21239	0.751774	-0.00445824	0.791541	1.09087	0.512627	-0.00719787	0.465816	1.14006	0.516907	-0.00380587	0.519983	1.18887	1.06732	-0.00463101	1.10967	0.495232	0.636603	-0.00234045	0.575646	0.705615	0.736561	-0.00705364	0.666189	1.62275	0.724456	-0.0101293	0.656215	0.475911	0.352951	-0.00361538	0.341322	0.649828
57.5616	107	107		112	0.10966	0.0312577	0.000309726	0.0509523	1.41145	0.813735	-0.00497664	0.835777	0.794116	0.39033	0.00109591	0.467065	1.37236	0.747297	-0.00449605	0.78386	0.764599	0.505443	-0.00716858	0.458978	0	0.513131	-0.00374563	0.517241	0.867929	1.06267	-0.0046718	1.10131	0.826105	0.634248	-0.0023706	0.572627	1.38226	0.7295	-0.00706878	0.659579	2.20699	0.714334	-0.010114	0.646343	0.763073	0.34934	-0.00360689	0.337862	0.433596
197.884	108	108		113	0.109707	0.0315797	0.000333873	0.0508673	1.41204	0.808738	-0.00501587	0.820137	0.264524	0.391459	0.00116211	0.467065	0.738063	0.742783	-0.00453163	0.776253	0.109119	0.498291	-0.00713662	0.452251	0	0.509417	-0.00368097	0.514522	0.776622	1.05798	-0.00470932	1.09302	0.330582	0.631862	-0.00239987	0.569623	0.605499	0.722426	-0.00707829	0.653035	0.405489	0.70423	-0.0100929	0.636619	0.0953054	0.345737	-0.00359878	0.334438	0.433779
55.1348	109	109		114	0	0.0319246	0.000355421	0.0507873	0.56587	0.803705	-0.0050486	0.805306	0.441694	0.392653	0.00122609	0.467065	1.42877	0.738234	-0.00456511	0.76872	0.766348	0.491171	-0.00710289	0.445631	1.71549	0.505771	-0.00361209	0.511827	0.961988	1.05325	-0.0047436	1.08479	0.993594	0.629448	-0.00242797	0.566636	1.41939	0.715345	-0.00708254	0.646556	1.45286	0.69415	-0.0100659	0.627042	0.764818	0.342142	-0.00359088	0.331048	0.651881
95.8243	110	110		115	0	0.0322897	0.000374361	0.050712	1.42371	0.798643	-0.00507532	0.791241	0.623208	0.393911	0.00128789	0.467065	0.903923	0.733653	-0.00459664	0.761261	0.66012	0.484085	-0.00706769	0.439117	1.15096	0.502195	-0.00353896	0.509156	0.8062	1.04849	-0.00477464	1.07662	1.50157	0.627007	-0.00245487	0.563664	1.25755	0.708262	-0.00708169	0.640141	0.46716	0.6841	-0.0100332	0.617609	1.15503	0.338555	-0.00358324	0.327693	0.437362
93.2544	111	111		116	0.0554011	0.0326725	0.000390717	0.0506411	2.56991	0.793557	-0.00509633	0.777905	0.0890549	0.395228	0.00134722	0.467065	1.11921	0.729042	-0.00462626	0.753873	0.440833	0.477036	-0.00703111	0.432708	0.576464	0.498694	-0.00346145	0.506509	0.876966	1.0437	-0.00480212	1.06851	0.500824	0.624539	-0.00248066	0.560707	1.15732	0.701183	-0.00707573	0.63379	0.350531	0.674086	-0.00999455	0.608318	0.288771	0.334976	-0.00357569	0.324371	1.09528
137.413	112	112		117	0.113219	0.0330703	0.000404453	0.0505744	0	0.788452	-0.00511162	0.765258	0.363989	0.396604	0.00140401	0.467065	0.761691	0.724401	-0.00465395	0.746558	0.450449	0.470024	-0.00699323	0.426401	0	0.495273	-0.00337982	0.503884	1.06207	1.03889	-0.00482604	1.06047	0.511748	0.622046	-0.00250597	0.557766	0.694508	0.694113	-0.00706456	0.627502	1.13662	0.664113	-0.00995009	0.599166	0.196713	0.331404	-0.00356788	0.321083	0.895332
59.9318	113	113		118	0.113655	0.0334805	0.000415537	0.0505116	0.877718	0.783335	-0.00512137	0.753265	0.45674	0.398035	0.00145832	0.467065	0.655549	0.719734	-0.00467979	0.739313	0.56523	0.46305	-0.00695352	0.420196	1.18261	0.491936	-0.00329411	0.501283	0.733164	1.03405	-0.00484647	1.05248	0.513719	0.619527	-0.00253053	0.554841	0.87174	0.687056	-0.00704835	0.621276	1.44242	0.654188	-0.00989923	0.590152	0.692135	0.32784	-0.00355974	0.317829	0.898782
135.04	114	114		119	0.0568762	0.0339005	0.000423998	0.0504526	0.585645	0.778211	-0.00512653	0.741892	0.640896	0.39952	0.00151009	0.467065	0.820409	0.715042	-0.00470395	0.732139	0.113143	0.456117	-0.00691236	0.414089	0	0.488686	-0.00320502	0.498705	0.781436	1.0292	-0.0048635	1.04456	1.88696	0.616985	-0.00255452	0.551931	0.627827	0.680018	-0.00702733	0.615112	0.540396	0.644317	-0.00984231	0.581274	0.395279	0.324285	-0.00355144	0.314608	0.899549
202.555	115	115		120	0	0.0343277	0.000429981	0.0503969	0.293999	0.773083	-0.0051277	0.731108	0.27538	0.401055	0.0015595	0.467065	0.658745	0.710327	-0.00472612	0.725034	0	0.449226	-0.00686999	0.408081	0	0.485527	-0.00311336	0.496149	1.2871	1.02432	-0.00487781	1.03669	0.34415	0.614418	-0.00257824	0.549036	0.0698836	0.673003	-0.0070013	0.609009	0.180655	0.634505	-0.00977981	0.572529	0.0992168	0.320737	-0.00354299	0.311419	0.451582
68.7144	116	116		121	0.114364	0.0347597	0.000433909	0.0503446	0.883188	0.767957	-0.00512506	0.720881	0.459586	0.402639	0.00160768	0.467065	0.714512	0.705591	-0.00474655	0.717998	0.455002	0.442378	-0.0068261	0.402169	0	0.48246	-0.00301974	0.493616	1.24094	1.01944	-0.00489042	1.02888	0.689228	0.611828	-0.00260211	0.546156	1.08851	0.666016	-0.00697067	0.602967	1.51171	0.624759	-0.00971231	0.563916	0.298052	0.317199	-0.00353367	0.308263	1.58493
46.3363	117	117		122	0.115217	0.035195	0.000436488	0.0502953	0.889781	0.762834	-0.00511958	0.711184	0.741753	0.40427	0.00165482	0.467065	1.10852	0.700835	-0.00476507	0.71103	1.03254	0.435575	-0.00677947	0.396352	0.599434	0.479488	-0.00292434	0.491104	0.960168	1.01454	-0.00490233	1.02114	0.347186	0.609214	-0.0026253	0.543291	1.16784	0.659063	-0.00693635	0.596985	1.523	0.615082	-0.00963976	0.555433	0.701647	0.313671	-0.00352246	0.305138	0.227783
59.0589	118	118		123	0	0.0356322	0.000437693	0.050249	1.48594	0.757719	-0.00511146	0.701988	0.463946	0.405948	0.00170025	0.467065	0.776689	0.696061	-0.00478227	0.704131	0.919785	0.42882	-0.00672966	0.390628	0	0.476612	-0.00282708	0.488615	1.54404	1.00964	-0.00491389	1.01345	0.869707	0.606578	-0.00264804	0.540442	1.77664	0.652145	-0.00689898	0.591062	0.670197	0.605481	-0.00956245	0.547077	0.501465	0.310155	-0.00350892	0.302045	0
46.6409	119	119		124	0.0578359	0.03607	0.000437719	0.0502053	0.595528	0.752612	-0.00510128	0.693267	0.185937	0.40767	0.00174398	0.467065	0.722686	0.69127	-0.00479871	0.697298	1.15167	0.422116	-0.00667705	0.384995	1.2036	0.473834	-0.00272977	0.486148	0.988182	1.00472	-0.0049242	1.00581	0.697113	0.603918	-0.0026705	0.537607	0.780686	0.645266	-0.00685902	0.585198	0.794083	0.595959	-0.00948108	0.538846	0.502436	0.306653	-0.00349356	0.298984	0.228682
57.9862	120	120		125	0	0.0365073	0.000436557	0.0501643	2.68272	0.747517	-0.00508947	0.684998	0.651678	0.409435	0.00178618	0.467065	1.33596	0.686463	-0.00481506	0.690531	1.38285	0.415467	-0.00662156	0.379453	1.20354	0.471152	-0.00263335	0.483703	1.74194	0.999788	-0.00493312	0.998241	1.3959	0.601237	-0.0026928	0.534788	0.602648	0.638427	-0.00681682	0.579391	1.59053	0.58652	-0.00939631	0.53074	0.602893	0.303168	-0.00347688	0.295954	0.457342
43.7249	121	121		126	0.173585	0.0369427	0.000434187	0.0501256	1.48948	0.742434	-0.00507498	0.677156	0.465051	0.411242	0.00182694	0.467065	0.611392	0.68164	-0.0048309	0.68383	1.15218	0.408874	-0.00656319	0.374	0.602068	0.468566	-0.00253808	0.481279	0.867445	0.994851	-0.00494102	0.990724	0.348712	0.598533	-0.00271504	0.531983	0.674112	0.631633	-0.00677222	0.573643	0.978098	0.577167	-0.00930798	0.522756	1.10686	0.2997	-0.0034588	0.292954	1.14392
62.8029	122	122		127	0.0579798	0.0373752	0.000430607	0.0500892	1.49252	0.737368	-0.0050576	0.66972	0.1864	0.413088	0.00186633	0.467065	1.39499	0.676802	-0.00484615	0.677194	0.80852	0.402341	-0.00650202	0.368634	1.80989	0.466076	-0.00244413	0.478876	1.0635	0.989906	-0.00494804	0.983263	0.524135	0.595807	-0.00273718	0.529192	0.390604	0.624884	-0.00672523	0.567952	1.47167	0.567905	-0.00921616	0.514891	0.806905	0.296251	-0.00343931	0.289985	0.458502
61.5819	123	123		128	0	0.0378035	0.000425781	0.050055	0.897882	0.73232	-0.00503692	0.662669	0.186893	0.414974	0.00190442	0.467065	0.950122	0.671948	-0.00486021	0.670623	1.15759	0.395871	-0.00643853	0.363354	0.604891	0.463678	-0.00235218	0.476494	1.21264	0.984955	-0.00495467	0.975859	0.175174	0.593059	-0.00275886	0.526417	1.28589	0.618183	-0.00667604	0.562317	1.04399	0.558736	-0.00912095	0.507145	1.11205	0.292822	-0.00341834	0.287045	0.459715
193.951	124	124		129	0	0.0382264	0.000419731	0.0500228	1.21147	0.727295	-0.00501336	0.655982	0.946566	0.416897	0.00194151	0.467065	0.395765	0.667082	-0.00487312	0.664115	0.351071	0.389465	-0.00637353	0.358159	0.612113	0.46137	-0.00226246	0.474134	0.931198	0.979997	-0.00496154	0.968511	0.177265	0.590289	-0.00277993	0.523656	0.468664	0.611532	-0.0066251	0.556738	0.248139	0.549664	-0.00902257	0.499516	0.102209	0.289415	-0.00339595	0.284136	1.39561
99.3935	125	125		130	0.0588524	0.0386426	0.00041251	0.0499924	1.21199	0.722294	-0.00498732	0.649641	0.189205	0.418857	0.00197769	0.467065	0.848915	0.662203	-0.00488473	0.65767	0.702443	0.383124	-0.00630665	0.353047	0	0.459151	-0.00217609	0.471794	1.0302	0.975032	-0.00496827	0.961218	0.532023	0.587499	-0.00280054	0.520909	1.5564	0.604933	-0.00657356	0.551214	0.8701	0.540692	-0.00892222	0.492001	0.409013	0.286031	-0.00337234	0.281256	1.16351
55.8848	126	126		131	0	0.0390511	0.000404197	0.0499639	0.303611	0.717321	-0.00495834	0.643628	0.379177	0.420852	0.00201272	0.467065	1.58977	0.657313	-0.00489468	0.651288	1.17428	0.376852	-0.00623761	0.348017	0	0.457017	-0.00209411	0.469474	0.933483	0.97006	-0.00497457	0.95398	0.5331	0.584688	-0.00282058	0.518177	1.26836	0.598385	-0.00652189	0.545745	1.18404	0.53182	-0.00882048	0.484599	0.307381	0.28267	-0.00334806	0.278405	1.39903
57.9862	127	127		132	0.117961	0.0394507	0.000394897	0.049937	1.51828	0.712378	-0.00492661	0.637926	0.379234	0.422882	0.00204644	0.467065	0.963971	0.652414	-0.004903	0.644968	0.586643	0.37065	-0.00616614	0.343067	0	0.454962	-0.00201627	0.467175	1.7019	0.965083	-0.00498061	0.946796	0.177727	0.581858	-0.00284009	0.515459	0.868676	0.591889	-0.00647055	0.540331	1.43425	0.523051	-0.00871747	0.477309	0.614855	0.279335	-0.00332328	0.275584	0.699624
198.113	128	128		133	0	0.0398406	0.000384819	0.0499117	0	0.707468	-0.00489332	0.632519	0.474595	0.424944	0.0020789	0.467065	1.079	0.647507	-0.00491003	0.638709	0.704793	0.36452	-0.0060924	0.338197	0	0.452983	-0.00194155	0.464896	0.441766	0.960099	-0.00498694	0.939667	1.06761	0.579008	-0.00285907	0.512755	0.21679	0.585444	-0.00642027	0.53497	0.0622689	0.514385	-0.00861377	0.470128	0	0.276024	-0.00329813	0.27279	0.700439
86.1007	129	129		134	0	0.04022	0.000373947	0.0498879	1.5297	0.702592	-0.00485811	0.627392	0.0955217	0.427039	0.00210974	0.467065	0.627901	0.642594	-0.00491634	0.632511	0.591056	0.358466	-0.00601696	0.333405	1.85497	0.451078	-0.00186953	0.462637	0.791553	0.955109	-0.00499404	0.932591	0.89532	0.57614	-0.00287754	0.510066	1.09483	0.579048	-0.00637121	0.529662	1.06717	0.505824	-0.00850927	0.463056	0.930252	0.272738	-0.00327283	0.270026	1.40977
159.256	130	130		135	0	0.0405882	0.000362324	0.0498655	0.919815	0.697753	-0.00482149	0.62253	0.574375	0.429163	0.0021392	0.467065	0.744144	0.637675	-0.00492223	0.626373	0.473872	0.352487	-0.00594012	0.32869	0	0.449243	-0.0018002	0.460398	0.544819	0.950111	-0.00500211	0.925568	0.358906	0.573253	-0.0028952	0.507391	0.767062	0.572701	-0.00632332	0.524407	0.440231	0.497367	-0.00840353	0.45609	0.206942	0.269478	-0.00324718	0.267289	0.470945
55.1348	131	131		136	0.119183	0.0409445	0.000350095	0.0498445	1.2272	0.69295	-0.00478407	0.617919	0.287371	0.431317	0.00216733	0.467065	1.722	0.63275	-0.00492714	0.620295	0.474175	0.346586	-0.00586195	0.32405	2.48026	0.447477	-0.00173362	0.458179	0.918333	0.945104	-0.00501131	0.918598	0.359135	0.57035	-0.00291246	0.504729	1.20803	0.566401	-0.00627651	0.519204	0.503352	0.489017	-0.0082969	0.449228	0.932869	0.266244	-0.00322118	0.26458	1.17811
171.52	132	132		137	0	0.0412882	0.000337273	0.0498246	0.614718	0.688185	-0.00474572	0.613547	0.960605	0.433498	0.00219405	0.467065	0.343767	0.627821	-0.00493099	0.614275	0.118759	0.340763	-0.00578257	0.319484	0.621192	0.445775	-0.00167002	0.455979	1.04503	0.940088	-0.00502207	0.911681	0.899471	0.567429	-0.00292974	0.502082	0.365661	0.560147	-0.0062313	0.514053	0.12591	0.480774	-0.00818988	0.44247	0.311176	0.263036	-0.00319497	0.261898	0.472103
85.0585	133	133		138	0.241872	0.0416188	0.000323855	0.0498059	0.311314	0.683459	-0.00470626	0.609401	0.0971995	0.435705	0.00221989	0.467065	0.755574	0.622888	-0.00493422	0.608314	0.843216	0.335021	-0.005702	0.314992	0.629186	0.444136	-0.00160922	0.453798	0.881439	0.935059	-0.0050347	0.904816	0.911046	0.56449	-0.00294743	0.499449	0.927582	0.553938	-0.00618799	0.508953	0.83022	0.472637	-0.00808286	0.435813	0.525301	0.259854	-0.00316871	0.259243	0.717267
51.9527	134	134		139	0.0605921	0.0419358	0.000309905	0.0497884	0	0.678773	-0.00466547	0.605469	0.584395	0.437937	0.00224444	0.467065	0.990311	0.617952	-0.00493729	0.602411	1.56936	0.32936	-0.00562043	0.310572	1.26096	0.442556	-0.00155142	0.451637	1.08603	0.930017	-0.00504975	0.898003	0.730333	0.561533	-0.00296593	0.496829	1.22832	0.547771	-0.006147	0.503903	1.40954	0.464608	-0.00797654	0.429257	0.948536	0.256699	-0.00314247	0.256616	1.1979
86.6494	135	135		140	0	0.0422385	0.000295376	0.0497718	0.31223	0.674129	-0.00462186	0.601741	0.292456	0.440193	0.0022676	0.467065	1.22516	0.613014	-0.00494019	0.596565	0.361924	0.32378	-0.00553836	0.306222	0	0.441032	-0.00149667	0.449495	1.06159	0.924959	-0.00506746	0.891241	0.182745	0.558558	-0.00298537	0.494223	0.706545	0.541643	-0.00610816	0.498904	0.576211	0.456684	-0.00787141	0.422799	0.421476	0.253569	-0.00311649	0.254015	0.239792
202.31	136	136		141	0	0.0425263	0.000280258	0.0497563	1.25006	0.66953	-0.00457594	0.598205	0.585445	0.442472	0.00228911	0.467065	0.466626	0.608072	-0.00494306	0.590776	0	0.318283	-0.00545634	0.301943	0	0.439561	-0.00144528	0.447371	0.808562	0.919881	-0.00508798	0.884529	0.365823	0.555562	-0.00300565	0.491631	0.558249	0.535554	-0.0060714	0.493954	0.256043	0.448864	-0.00776729	0.416439	0.105465	0.250466	-0.00309084	0.25144	0
49.2093	137	137		142	0	0.0427988	0.000264535	0.0497416	1.25055	0.664977	-0.00452825	0.594853	0.390449	0.444771	0.00230844	0.467065	1.28562	0.603128	-0.00494561	0.585043	1.32999	0.312868	-0.00537479	0.297731	0.631858	0.43814	-0.00139754	0.445266	1.2667	0.914782	-0.00511134	0.877869	0.182983	0.552546	-0.00302643	0.489052	1.19348	0.5295	-0.00603665	0.489053	1.47666	0.441149	-0.00766415	0.410174	0.633038	0.247388	-0.0030651	0.248892	1.20052
59.7805	138	138		143	0.0609359	0.0430552	0.000248171	0.0497278	2.1992	0.660473	-0.00447968	0.591673	0.686642	0.447088	0.00232584	0.467065	1.17254	0.598181	-0.00494727	0.579366	1.45705	0.307533	-0.00529414	0.293588	1.26811	0.436765	-0.00135375	0.44318	1.55288	0.909658	-0.00513647	0.871258	0	0.549509	-0.00304831	0.486487	0.897475	0.52348	-0.00600401	0.484201	1.09432	0.433536	-0.00756253	0.404003	0.529366	0.244335	-0.00303938	0.246369	1.2047
69.376	139	139		144	0	0.0432949	0.000231179	0.0497148	0.947089	0.656018	-0.00443033	0.588659	0.69096	0.449422	0.00234259	0.467065	0.825058	0.593234	-0.00494648	0.573744	0.365942	0.302279	-0.00521376	0.28951	0.638042	0.435431	-0.00131513	0.441112	1.2791	0.904509	-0.0051623	0.864698	0.92387	0.54645	-0.00307071	0.483936	1.09185	0.517491	-0.00597267	0.479397	1.03654	0.426024	-0.00746144	0.397925	0.532695	0.241309	-0.00301396	0.243872	0.969818
91.4093	140	140		145	0.061523	0.0435173	0.000213601	0.0497026	0.633493	0.651613	-0.00438045	0.5858	0.197791	0.451773	0.00235885	0.467065	1.65856	0.588289	-0.00494247	0.568176	0.857929	0.297106	-0.00513335	0.285498	0	0.434132	-0.00128241	0.439062	1.30913	0.899334	-0.00518805	0.858186	0.185388	0.543368	-0.00309314	0.481397	1.17114	0.511534	-0.00594154	0.47464	0.779828	0.418613	-0.00736044	0.391939	0.427573	0.238307	-0.00298898	0.2414	0.973044
46.0743	141	141		146	0	0.0437219	0.000195424	0.0496911	0.639213	0.647258	-0.00433009	0.583089	0.199577	0.45414	0.00237462	0.467065	0.775699	0.58335	-0.0049355	0.562662	1.11266	0.292012	-0.00505311	0.281551	0.645945	0.432864	-0.00125546	0.43703	1.03467	0.894133	-0.00521354	0.851724	0.74825	0.540263	-0.00311577	0.478872	0.723238	0.505608	-0.00591046	0.469931	1.5757	0.411303	-0.00725967	0.386043	0.431434	0.235331	-0.00296439	0.238953	0.245457
85.7337	142	142		147	0.0623926	0.043908	0.000176561	0.0496803	1.28489	0.642953	-0.00427908	0.580518	0.100293	0.456522	0.00239004	0.467065	0.419752	0.578419	-0.00492594	0.557202	2.36318	0.286999	-0.00497334	0.277666	0.649213	0.43162	-0.00123379	0.435015	1.24923	0.888907	-0.00523846	0.84531	0.752036	0.537136	-0.00313905	0.476361	0.957108	0.499713	-0.00587924	0.465269	1.25273	0.404093	-0.00715935	0.380235	0.868318	0.232378	-0.00294017	0.236532	0.493399
0	143	143		148	1.37937	0.0440749	0.000157351	0.0496701	0.643844	0.6387	-0.00422682	0.57808	1.10663	0.45892	0.00240542	0.467065	0.901937	0.573499	-0.00491373	0.551795	0.871946	0.282066	-0.00489415	0.273844	1.30125	0.430395	-0.00121751	0.433019	0.519915	0.883656	-0.00526276	0.838945	0.942088	0.533985	-0.00316241	0.473862	0.76712	0.49385	-0.0058477	0.460653	1.05698	0.396984	-0.00705974	0.374515	0.761565	0.22945	-0.00291625	0.234134	0.494471
66.137	144	144		149	0.188307	0.0442227	0.000138141	0.0496605	1.29265	0.6345	-0.00417244	0.575769	0.201797	0.461333	0.00242099	0.467065	0.361441	0.568593	-0.00489872	0.54644	1.50088	0.277211	-0.00481534	0.270083	0	0.429183	-0.00120654	0.43104	1.23048	0.878381	-0.00528664	0.832628	0.756573	0.530811	-0.00318505	0.471377	0.924474	0.488018	-0.00581587	0.456082	1.32714	0.389974	-0.00696072	0.368881	0.545291	0.226546	-0.00289234	0.231761	1.24094
67.8382	145	145		150	0.188429	0.0443512	0.000118916	0.0496515	0.323371	0.630356	-0.00411605	0.573577	0.403855	0.463762	0.00243664	0.467065	0.784835	0.563702	-0.00488104	0.541138	0.749675	0.272435	-0.00473692	0.266383	1.96066	0.42798	-0.00120021	0.429079	0.784294	0.873083	-0.0053102	0.826358	0.378531	0.527615	-0.00320707	0.468904	1.04114	0.482218	-0.00578377	0.451557	1.99432	0.383062	-0.00686226	0.363331	0.764993	0.223665	-0.00286846	0.229412	0.248348
58.6388	146	146		151	0.0628283	0.0444605	9.96633e-05	0.049643	0.646933	0.626268	-0.00405812	0.571498	1.11194	0.466206	0.00245232	0.467065	0.603573	0.558831	-0.00486114	0.535886	0.749898	0.267737	-0.00465925	0.262741	0.653746	0.426781	-0.00119787	0.427134	0.88953	0.867761	-0.00533377	0.820135	0.567965	0.524397	-0.00322901	0.466445	1.07989	0.476451	-0.00575163	0.447077	1.46156	0.376249	-0.00676464	0.357865	0.218322	0.220809	-0.00284454	0.227087	1.98986
99.1973	147	147		152	0	0.0445505	8.03864e-05	0.049635	1.62676	0.62224	-0.00399872	0.569527	0.40633	0.468666	0.0024681	0.467065	0.972197	0.553981	-0.00483931	0.530686	0.251423	0.263116	-0.00458265	0.259158	1.31511	0.425582	-0.00120063	0.425207	1.07974	0.862415	-0.00535736	0.813959	0.761701	0.521157	-0.00325141	0.463999	0.503458	0.470715	-0.00571968	0.442642	1.13488	0.369532	-0.00666866	0.352481	0.548988	0.217976	-0.00282085	0.224785	1.49922
57.4843	148	148		153	0.0632529	0.0446213	6.1202e-05	0.0496275	1.62826	0.618272	-0.00393707	0.567657	0.305029	0.471142	0.00248375	0.467065	0.790373	0.549153	-0.00481522	0.525536	0.754965	0.258571	-0.00450665	0.255633	0	0.424378	-0.00120875	0.423297	0.948266	0.857046	-0.0053804	0.80783	0.762404	0.517895	-0.00327333	0.461565	1.00939	0.465011	-0.00568733	0.43825	1.27	0.362911	-0.00657439	0.347179	0.659393	0.215167	-0.00279746	0.222507	1.2505
0	149	149		154	0.697379	0.0446731	4.24114e-05	0.0496204	0.652208	0.614367	-0.00387236	0.565885	1.32566	0.473634	0.00249934	0.467065	1.83035	0.544351	-0.00478865	0.520436	0.883274	0.254103	-0.00443098	0.252164	1.31815	0.423163	-0.00122203	0.421403	0.896782	0.851655	-0.00540253	0.801747	0.954326	0.514611	-0.00329394	0.459144	1.16699	0.459341	-0.00565386	0.433902	1.27176	0.356383	-0.00648153	0.341956	0.991561	0.212381	-0.00277445	0.220252	0.751342
71.4414	150	150		155	0.190425	0.0447063	2.40702e-05	0.0496138	0.653593	0.610528	-0.0038056	0.564204	0.102033	0.476141	0.00251438	0.467065	0.670705	0.539577	-0.00475961	0.515386	0.12627	0.249709	-0.00435547	0.24875	0	0.421933	-0.00123898	0.419527	1.11112	0.846242	-0.00542358	0.79571	0.382541	0.511307	-0.00331252	0.456736	1.05217	0.453704	-0.00561944	0.429597	0.603094	0.349948	-0.00638878	0.336811	0.330855	0.209618	-0.00275199	0.218019	0.752938
39.9999	151	151		156	0.127266	0.0447214	6.39624e-06	0.0496075	1.31043	0.606756	-0.00373789	0.56261	1.02389	0.478662	0.00252823	0.467065	0.79512	0.534833	-0.0047282	0.510385	0.632917	0.245391	-0.00428041	0.245392	1.32423	0.420685	-0.00125642	0.417666	1.06057	0.840808	-0.00544354	0.789718	0.383492	0.507986	-0.00333016	0.45434	1.72215	0.448102	-0.00558414	0.425335	1.00855	0.343606	-0.00629572	0.331744	0.442236	0.206877	-0.0027303	0.215809	0.251603
191.844	152	152		157	0	0.0447193	-1.04761e-05	0.0496016	0	0.603052	-0.00366888	0.561098	0.615132	0.481197	0.00253989	0.467065	0.612708	0.530121	-0.00469508	0.505432	0	0.241148	-0.00420644	0.242087	0	0.41942	-0.00127369	0.415822	0.982869	0.835355	-0.00546232	0.783771	0.192187	0.504647	-0.00334735	0.451957	0.351622	0.442536	-0.00554845	0.421115	0.134513	0.337356	-0.00620307	0.326754	0	0.204157	-0.00270931	0.213622	0.756544
105.475	153	153		158	0	0.0447007	-2.65832e-05	0.049596	1.31352	0.599418	-0.00359868	0.559665	0.410111	0.483741	0.00254908	0.467065	0.306064	0.525443	-0.00466042	0.500527	0.126881	0.236978	-0.00413378	0.238835	0.663675	0.418138	-0.00129095	0.413994	0.90304	0.829884	-0.00548004	0.777869	0.192197	0.501292	-0.00336362	0.449587	0.508143	0.437005	-0.00551221	0.416937	0.538755	0.331199	-0.00611088	0.321838	0.554096	0.201458	-0.00268926	0.211457	2.27228
101.316	154	154		159	0	0.0446664	-4.19618e-05	0.0495908	2.64174	0.595855	-0.00352794	0.558306	0.102973	0.486294	0.00255525	0.467065	1.10908	0.5208	-0.00462478	0.49567	1.40303	0.23288	-0.0040619	0.235635	0	0.416838	-0.00130858	0.412182	1.41703	0.824395	-0.00549639	0.772012	0.579096	0.49792	-0.00337897	0.447229	0.431563	0.431512	-0.00547513	0.4128	0.879533	0.325134	-0.00601882	0.316996	0.667803	0.198779	-0.00266994	0.209314	0.759871
156.665	155	155		160	0.0644564	0.044617	-5.66549e-05	0.0495859	0.663698	0.592363	-0.00345666	0.557017	0.207222	0.48885	0.00255755	0.467065	0.247438	0.516194	-0.00458852	0.49086	0.384665	0.228854	-0.00399028	0.232486	0	0.41552	-0.00132676	0.410387	0.72413	0.818892	-0.00551108	0.766198	0.776911	0.494534	-0.00339346	0.444883	0.474071	0.426055	-0.00543713	0.408704	0.339855	0.319162	-0.0059266	0.312227	0.11199	0.196118	-0.00265136	0.207192	0.764578
43.2741	156	156		161	0.06446	0.0445533	-7.06515e-05	0.0495813	0.663734	0.588942	-0.00338456	0.555795	0	0.491408	0.00255635	0.467065	0.805456	0.511624	-0.00455131	0.486097	0.898884	0.2249	-0.00391857	0.229388	0.670724	0.414185	-0.00134484	0.408606	1.34462	0.813374	-0.00552353	0.760429	1.16543	0.491134	-0.0034068	0.442549	1.02866	0.420638	-0.0053976	0.404649	1.22626	0.313281	-0.00583393	0.30753	0.671977	0.193476	-0.00263342	0.205092	0.254874
41.6767	157	157		162	0.130126	0.044476	-8.39207e-05	0.0495769	2.68312	0.585594	-0.00331155	0.554635	0.942316	0.493962	0.00255203	0.467065	0.938497	0.507092	-0.00451301	0.48138	1.03672	0.221017	-0.00384672	0.22634	1.35399	0.41283	-0.00136376	0.406842	0.921166	0.807845	-0.00553393	0.754703	1.17633	0.487721	-0.00341858	0.440228	1.15851	0.415261	-0.00535645	0.400635	0.893307	0.307494	-0.00574041	0.302904	0.339131	0.190851	-0.00261512	0.203013	1.02903
54.698	158	158		163	0.130169	0.0443857	-9.64493e-05	0.0495728	2.0105	0.582319	-0.00323725	0.553536	0.838011	0.49651	0.00254423	0.467065	0.625249	0.502598	-0.00447424	0.476708	1.03707	0.217206	-0.00377465	0.22334	0	0.411456	-0.00138462	0.405093	1.30313	0.802307	-0.00554252	0.74902	0	0.484297	-0.00342858	0.437919	0.958578	0.409925	-0.00531384	0.39666	1.30678	0.301801	-0.00564577	0.298347	0.339244	0.188246	-0.0025958	0.200956	1.54406
72.2577	159	159		164	0.0651501	0.0442833	-0.000108262	0.0495689	1.34168	0.57912	-0.00316179	0.552494	0.104726	0.49905	0.00253433	0.467065	1.00228	0.498143	-0.004435	0.472082	0.77761	0.213468	-0.00370245	0.220388	0.677905	0.410061	-0.00140748	0.403359	1.46844	0.796761	-0.0055495	0.743379	1.17791	0.480865	-0.0034364	0.435622	0.919279	0.404634	-0.0052696	0.392724	0.687711	0.296203	-0.00554991	0.293858	0.452781	0.18566	-0.00257543	0.198919	1.28801
80.5883	160	160		165	0.131114	0.0441694	-0.000119409	0.0495653	2.36598	0.575996	-0.00308544	0.551506	0.21076	0.501579	0.00252351	0.467065	1.07146	0.493728	-0.00439513	0.467501	0.652055	0.209801	-0.00363051	0.217484	0.682138	0.408641	-0.00143284	0.401641	1.06518	0.791208	-0.00555528	0.737782	1.38478	0.477425	-0.00344197	0.433338	0.562393	0.399387	-0.00522392	0.388828	1.31626	0.290702	-0.00545266	0.289438	0.683413	0.183095	-0.00255405	0.196903	1.03684
57.3681	161	161		166	0.0656215	0.0440447	-0.000129945	0.0495619	1.01354	0.572949	-0.00300847	0.550569	0.316451	0.504097	0.00251206	0.467065	0.756993	0.489353	-0.00435439	0.462964	0.522158	0.206207	-0.00355915	0.214626	0	0.407194	-0.00146121	0.399938	1.23115	0.78565	-0.00556009	0.732226	0.395477	0.473981	-0.00344567	0.431065	0.522794	0.394186	-0.00517669	0.38497	0.970178	0.285298	-0.00535414	0.285083	0.684086	0.180552	-0.002532	0.194907	0.518933
173.298	162	162		167	0.0657808	0.0439097	-0.000139875	0.0495587	0.677335	0.569979	-0.00293155	0.54968	0.10574	0.506603	0.00249948	0.467065	0.315653	0.48502	-0.00431286	0.458472	0.130856	0.202683	-0.00348821	0.211815	0	0.405718	-0.00149169	0.398249	0.793842	0.780088	-0.00556375	0.726712	0.792875	0.470534	-0.00344772	0.428804	0.362658	0.389034	-0.0051282	0.381151	0.0693675	0.279994	-0.00525482	0.280795	0.114291	0.178031	-0.00250956	0.192931	0
81.6328	163	163		168	0.0658291	0.0437651	-0.000149199	0.0495556	1.35567	0.567086	-0.00285527	0.548837	0.42327	0.509095	0.00248619	0.467065	0.759388	0.480728	-0.00427051	0.454023	0.917977	0.19923	-0.00341795	0.209048	1.36994	0.404209	-0.00152525	0.396576	1.04203	0.774523	-0.0055666	0.72124	0.396728	0.467086	-0.00344807	0.426555	0.969543	0.38393	-0.00507861	0.377369	1.74032	0.274789	-0.00515505	0.27657	0.22875	0.175533	-0.00248671	0.190976	0.780862
196.334	164	164		169	0.0659764	0.0436115	-0.000157907	0.0495528	0.679348	0.564269	-0.00277908	0.548038	0.424216	0.511575	0.00247241	0.467065	0.824404	0.476479	-0.00422761	0.449617	0.131245	0.195847	-0.00334863	0.206325	0.686502	0.402666	-0.00156273	0.394917	0.713572	0.768955	-0.00556865	0.715809	0.596424	0.463639	-0.00344708	0.424317	0.282995	0.378877	-0.00502801	0.373625	0.278295	0.269684	-0.00505506	0.27241	0.458523	0.173058	-0.00246312	0.18904	1.04348
54.5785	165	165		170	0	0.0434495	-0.000166046	0.0495501	1.02058	0.561528	-0.00270302	0.54728	0.531082	0.51404	0.00245821	0.467065	0.571371	0.472273	-0.00418377	0.445254	0.788678	0.192533	-0.0032799	0.203646	0	0.401083	-0.0016038	0.393273	0.742341	0.763386	-0.00556972	0.710419	1.39578	0.460193	-0.00344491	0.422092	0.810663	0.373875	-0.00497642	0.369918	0.837557	0.264678	-0.00495501	0.268311	0.344419	0.170607	-0.00243882	0.187124	1.04507
48.8287	166	166		171	0.0664106	0.0432796	-0.000173621	0.0495476	1.36764	0.558862	-0.00262803	0.546561	0.320257	0.516491	0.00244336	0.467065	0.637988	0.468111	-0.0041396	0.440933	0.396328	0.189287	-0.00321207	0.20101	1.38204	0.399457	-0.00164706	0.391643	1.27377	0.757816	-0.00556995	0.705069	1.2007	0.456749	-0.00344233	0.419878	1.63316	0.368924	-0.00492445	0.366248	1.19264	0.259773	-0.0048555	0.264275	0.461541	0.168181	-0.00241396	0.185228	1.31293
42.5478	167	167		172	0.133353	0.0431025	-0.000180671	0.0495452	1.37312	0.556271	-0.00255464	0.54588	0.965689	0.518927	0.00242754	0.467065	1.02577	0.463994	-0.00409571	0.436654	0.79583	0.186108	-0.00314515	0.198417	0.693789	0.397788	-0.00169103	0.390027	1.98011	0.752247	-0.0055692	0.69976	0	0.453308	-0.00344032	0.417676	1.06403	0.364026	-0.00487261	0.362614	0.985777	0.254967	-0.00475696	0.260299	0.46339	0.165779	-0.00238883	0.18335	0.527276
119.504	168	168		173	0	0.0429184	-0.000187258	0.049543	1.72241	0.553752	-0.00248277	0.545234	0.430221	0.521346	0.00241072	0.467065	1.2875	0.45992	-0.00405264	0.432417	0.532412	0.182996	-0.003079	0.195864	0.696219	0.396076	-0.00173442	0.388426	0.779445	0.746678	-0.00556756	0.69449	0.403243	0.449868	-0.00343961	0.415485	0.861821	0.359179	-0.00482135	0.359017	0.98923	0.250259	-0.00465978	0.256383	0.465013	0.163403	-0.00236374	0.181492	0.264562
46.7711	169	169		174	0	0.0427281	-0.000193328	0.0495409	0.692043	0.551305	-0.00241229	0.544621	0.324108	0.523748	0.00239341	0.467065	0.904311	0.455888	-0.0040114	0.42822	1.20462	0.17995	-0.00301426	0.193353	2.09799	0.394319	-0.00177861	0.386839	1.06388	0.741111	-0.00556604	0.689261	1.41969	0.446428	-0.00344104	0.413306	2.1101	0.354383	-0.00477106	0.355455	1.06523	0.245647	-0.00456459	0.252526	0.233546	0.161052	-0.00233893	0.179652	1.06298
72.5962	170	170		175	0.0673063	0.042532	-0.000198901	0.0495389	0.346521	0.548928	-0.00234205	0.54404	0.324576	0.526132	0.00237584	0.467065	1.03545	0.451896	-0.00397205	0.424065	1.60937	0.176967	-0.00295115	0.190882	0.700341	0.392518	-0.00182414	0.385266	1.06542	0.735546	-0.00556507	0.684071	0.608446	0.442985	-0.00344452	0.411138	1.11567	0.349636	-0.00472192	0.351928	0.995086	0.241129	-0.00447155	0.248727	0.116942	0.158725	-0.0023145	0.177832	1.06451
152.702	171	171		176	0.0673627	0.0423305	-0.000203922	0.049537	0.346812	0.546621	-0.00227177	0.543489	0	0.5285	0.00235838	0.467065	0.387893	0.447943	-0.0039341	0.41995	1.20737	0.174047	-0.00288955	0.188451	0.700928	0.39067	-0.00187147	0.383706	1.57502	0.729981	-0.0055649	0.678919	0.811941	0.439538	-0.00344898	0.408982	1.44883	0.344938	-0.00467408	0.348436	1.28148	0.236703	-0.00438077	0.244985	0.937487	0.156422	-0.00229067	0.176029	1.33175
169.01	172	172		177	0	0.0421243	-0.000208417	0.0495353	1.04044	0.544384	-0.00220183	0.542966	0.43313	0.530849	0.00234133	0.467065	0.841727	0.444027	-0.00389766	0.415875	0.268006	0.171187	-0.00282944	0.186058	0	0.388775	-0.00192031	0.38216	0.756781	0.724416	-0.00556538	0.673807	0.608956	0.436087	-0.0034544	0.406836	0.206093	0.340288	-0.00462761	0.344979	0.0710357	0.232367	-0.00429236	0.2413	0	0.154144	-0.00226738	0.174245	0.266351
74.7413	173	173		178	0.0674934	0.0419138	-0.000212461	0.0495336	1.73742	0.542217	-0.00213268	0.542471	0.650956	0.533182	0.00232498	0.467065	1.03833	0.440147	-0.00386294	0.411839	2.2865	0.168387	-0.00277091	0.183704	0.702288	0.386829	-0.00197052	0.380628	1.80536	0.71885	-0.00556588	0.668733	0.813517	0.432629	-0.0034605	0.404703	1.20179	0.335683	-0.00458256	0.341557	1.4982	0.228118	-0.00420646	0.23767	0.822039	0.151888	-0.00224436	0.172479	1.33434
37.2201	174	174		179	0.0676187	0.0416995	-0.000216054	0.0495321	1.39252	0.540119	-0.00206431	0.542001	0.761946	0.5355	0.00230925	0.467065	1.23559	0.436301	-0.00382998	0.407842	0.672563	0.165645	-0.00271395	0.181388	0.703592	0.384833	-0.00202196	0.379109	1.41051	0.713284	-0.00556634	0.663697	1.01878	0.429166	-0.00346707	0.40258	1.12085	0.331122	-0.00453895	0.338168	0.71377	0.223953	-0.0041231	0.234094	1.41216	0.149655	-0.00222156	0.170731	1.33682
32.2194	175	175		180	0.338084	0.0414819	-0.000219145	0.0495306	0.34812	0.538088	-0.00199679	0.541555	0.543455	0.537801	0.00229348	0.467065	0.844902	0.432487	-0.00379878	0.403885	0.807052	0.162959	-0.00265832	0.179108	0	0.382785	-0.00207345	0.377604	1.66621	0.707718	-0.00556668	0.6587	0.611253	0.425695	-0.00347363	0.400468	0.746387	0.326604	-0.00449686	0.334813	1.35762	0.21987	-0.00404231	0.230572	1.0585	0.147445	-0.00219875	0.169	0.802066
60.422	176	176		181	0.135635	0.0412614	-0.000221714	0.0495292	1.74576	0.536125	-0.00193006	0.541133	0.109014	0.540086	0.00227734	0.467065	0.782325	0.428703	-0.00376936	0.399965	1.62159	0.160328	-0.00260402	0.176866	0	0.380686	-0.00212431	0.376112	1.0167	0.702151	-0.00556689	0.65374	1.02178	0.422218	-0.00347997	0.398368	2.1292	0.322128	-0.00445642	0.331491	1.29013	0.215867	-0.00396414	0.227104	0.825986	0.145257	-0.00217592	0.167287	0.804447
55.6486	177	177		182	0	0.0410386	-0.00022382	0.0495279	0.700998	0.534228	-0.00186308	0.540732	0.328302	0.542355	0.00226062	0.467065	0.785341	0.424947	-0.0037419	0.396084	0.812568	0.157751	-0.0025511	0.174659	2.12514	0.378537	-0.00217426	0.374633	1.79222	0.696584	-0.00556755	0.648817	1.02572	0.418735	-0.00348654	0.396278	1.46424	0.317691	-0.00441775	0.328202	1.3669	0.211941	-0.00388859	0.223687	0.473136	0.143093	-0.00215324	0.165592	1.88697
83.6362	178	178		183	0	0.0408139	-0.000225496	0.0495267	0.350509	0.532399	-0.0017948	0.540352	1.09547	0.544607	0.00224325	0.467065	1.1787	0.421218	-0.00371638	0.39224	1.35567	0.155225	-0.00249958	0.172487	3.54201	0.376338	-0.00222272	0.373167	1.36312	0.691016	-0.00556833	0.643931	1.64325	0.415245	-0.00349319	0.3942	0.793169	0.313292	-0.00438034	0.324946	0.934746	0.20809	-0.00381533	0.220322	0.354862	0.140951	-0.00213059	0.163913	1.34595
101.399	179	179		184	0	0.0405877	-0.000226786	0.0495256	2.11287	0.530639	-0.00172531	0.539992	0.439791	0.546842	0.0022255	0.467065	0.854672	0.417514	-0.00369283	0.388434	0.272128	0.152751	-0.00244961	0.170351	0	0.374092	-0.00226921	0.371713	0.854083	0.685447	-0.00556871	0.639082	0.618321	0.411749	-0.00349971	0.392132	0.880993	0.30893	-0.00434429	0.321722	0.722002	0.20431	-0.00374438	0.217007	0.833064	0.138831	-0.00210789	0.162252	1.62268
0	180	180		185	0.894699	0.0403605	-0.000227696	0.0495245	0.353786	0.528949	-0.00165464	0.53965	0.44184	0.549058	0.0022074	0.467065	1.38822	0.413832	-0.00367126	0.384665	1.36835	0.150326	-0.00240122	0.168248	0.715022	0.371801	-0.00231364	0.370273	1.26045	0.679878	-0.00556865	0.63427	1.45154	0.408246	-0.00350607	0.390076	1.68988	0.304603	-0.00430961	0.31853	0.943483	0.2006	-0.00367574	0.213743	1.31452	0.136735	-0.00208513	0.160607	1.35853
201.326	181	181		186	0.137637	0.0401325	-0.000228227	0.0495235	0.708616	0.52733	-0.00158283	0.539326	0.442492	0.551256	0.00218896	0.467065	0.396277	0.410171	-0.00365168	0.380932	0.547598	0.147948	-0.00235441	0.16618	0	0.369466	-0.00235603	0.368845	0.45749	0.67431	-0.00556815	0.629494	0	0.404737	-0.0035123	0.38803	0.126328	0.30031	-0.00427631	0.31537	0.145142	0.196958	-0.00360941	0.210527	0	0.134661	-0.00206234	0.15898	1.90748
96.1962	182	182		187	0.20645	0.0399041	-0.000228407	0.0495225	1.41719	0.525783	-0.00151023	0.539019	0.22124	0.553436	0.00217028	0.467065	1.12473	0.406528	-0.00363438	0.377235	0.547582	0.145616	-0.00230928	0.164144	0	0.367089	-0.00239663	0.36743	1.0605	0.668742	-0.00556742	0.624753	0.829467	0.401221	-0.00351869	0.385994	0.632886	0.29605	-0.00424455	0.312241	0.798984	0.19338	-0.00354556	0.20736	0.597829	0.13261	-0.0020396	0.157368	1.0884
63.4266	183	183		188	0.0688086	0.0396758	-0.000228246	0.0495216	1.06277	0.52431	-0.00143729	0.538727	0.442427	0.555597	0.00215127	0.467065	1.39007	0.402901	-0.00361949	0.373574	0.959525	0.143329	-0.00226582	0.162141	0	0.364673	-0.00243558	0.366027	1.31976	0.663175	-0.00556646	0.620049	1.03671	0.397699	-0.00352545	0.38397	0.717018	0.29182	-0.00421434	0.309143	0.726329	0.189866	-0.00348422	0.204241	0.838057	0.130582	-0.00201699	0.155773	0.272068
87.7104	184	184		189	0	0.0394477	-0.000227768	0.0495207	0	0.522909	-0.0013649	0.538451	0.553197	0.557738	0.00213129	0.467065	0.793992	0.399288	-0.00360747	0.369949	0.684599	0.141084	-0.00222383	0.16017	0	0.362219	-0.00247274	0.364636	0.658221	0.657609	-0.00556555	0.61538	0.414807	0.39417	-0.00353325	0.381956	0.252694	0.28762	-0.00418586	0.306076	0.290327	0.186411	-0.00342571	0.201168	0.239174	0.128576	-0.00199463	0.154194	1.90776
173.481	185	185		190	0.068835	0.0392203	-0.000226982	0.04952	0.354392	0.52158	-0.00129313	0.538189	0.221298	0.559859	0.00211022	0.467065	0.529155	0.395685	-0.00359843	0.366359	0.547728	0.138881	-0.00218332	0.158231	2.14874	0.359728	-0.00250808	0.363258	0.658279	0.652044	-0.00556478	0.610746	0.622265	0.390632	-0.00354222	0.379953	0.168478	0.283448	-0.00415915	0.303039	0.362941	0.183013	-0.00337011	0.198142	0.47839	0.126593	-0.00197252	0.152632	0.544345
55.0952	186	186		191	0.137646	0.0389939	-0.000225911	0.0495192	0.354329	0.520322	-0.00122193	0.537941	0.553148	0.561958	0.00208793	0.467065	0.926022	0.39209	-0.00359256	0.362804	1.50735	0.136717	-0.00214437	0.156323	0.71612	0.357203	-0.00254135	0.361892	0.859379	0.64648	-0.00556402	0.606147	0.622155	0.387085	-0.00355187	0.37796	0.421541	0.279302	-0.00413413	0.300032	0.872356	0.17967	-0.00331744	0.195161	0.358729	0.124631	-0.00195063	0.151085	2.17971
32.6369	187	187		192	0	0.0387686	-0.000224583	0.0495185	1.77779	0.519136	-0.0011513	0.537705	0.889215	0.564035	0.00206424	0.467065	1.26195	0.388499	-0.00358974	0.359283	1.51258	0.134591	-0.00210697	0.154445	0.718603	0.354646	-0.00257195	0.360538	1.49875	0.640916	-0.00556307	0.601583	1.45881	0.383529	-0.00356173	0.375977	1.44269	0.275179	-0.0041107	0.297055	0.583344	0.176377	-0.00326752	0.192225	1.08112	0.122691	-0.00192887	0.149553	0.546135
61.0596	188	188		193	0.0692214	0.0385448	-0.000223024	0.0495178	0.356381	0.518019	-0.0010813	0.537482	0.333811	0.566086	0.00203896	0.467065	0.66499	0.38491	-0.00358953	0.355797	0.826204	0.132503	-0.00207104	0.152598	0.720268	0.35206	-0.00259907	0.359195	0.806369	0.635354	-0.00556171	0.597053	0.625758	0.379962	-0.00357152	0.374005	0.678964	0.27108	-0.00408878	0.294108	0.657691	0.173134	-0.00321993	0.189333	0.601345	0.120773	-0.00190711	0.148037	0.8211
164.957	189	189		194	0	0.0383226	-0.000221255	0.0495172	0.357017	0.516973	-0.0010122	0.53727	0.334407	0.568112	0.00201207	0.467065	0.666177	0.381319	-0.00359193	0.352344	0.275893	0.130449	-0.00203666	0.15078	1.44311	0.349449	-0.00262289	0.357865	0.865899	0.629793	-0.00556022	0.592557	0	0.376386	-0.00358109	0.372044	0.212157	0.267001	-0.00406852	0.29119	0.146252	0.169937	-0.00317476	0.186485	0.361451	0.118877	-0.00188541	0.146537	0.822566
85.9479	190	190		195	0.069554	0.0381023	-0.000219293	0.0495166	2.14856	0.515995	-0.000944272	0.537069	0.559025	0.57011	0.00198358	0.467065	0.734937	0.377725	-0.00359692	0.348925	0.830174	0.128429	-0.00200386	0.148991	0.723729	0.346816	-0.00264355	0.356546	1.01389	0.624233	-0.00555882	0.588095	1.04794	0.3728	-0.00359034	0.370092	0.938859	0.262942	-0.00405003	0.288301	1.17574	0.166784	-0.00313209	0.183679	0.483387	0.117002	-0.00186384	0.145052	0
88.4035	191	191		196	0	0.0378841	-0.000217139	0.0495161	1.08239	0.515084	-0.000877689	0.536878	0.337946	0.572078	0.00195323	0.467065	1.07811	0.374125	-0.0036042	0.345539	1.25605	0.126441	-0.00197231	0.147231	0.729191	0.344163	-0.00266089	0.355239	1.19736	0.618675	-0.00555769	0.583666	1.05585	0.369205	-0.00359895	0.368151	0.644495	0.258901	-0.00403288	0.285441	0.739739	0.163672	-0.00309179	0.180916	0.243518	0.115149	-0.00184233	0.143582	0.554182
90.5227	192	192		197	0	0.0376681	-0.000214811	0.0495155	0.361057	0.514239	-0.0008127	0.536698	0.22546	0.574016	0.00192094	0.467065	0.8763	0.370516	-0.00361307	0.342186	0.418522	0.124484	-0.00194151	0.145499	2.91887	0.341495	-0.00267507	0.353943	1.02228	0.613118	-0.00555694	0.579271	0.422645	0.365602	-0.00360654	0.36622	0.730783	0.254876	-0.00401622	0.282609	0.740273	0.160599	-0.00305336	0.178194	0.243694	0.113318	-0.00182075	0.142126	0.554582
53.3352	193	193		198	0.0706718	0.0374545	-0.000212375	0.049515	1.45539	0.513457	-0.000750619	0.536526	0.909951	0.575919	0.00188583	0.467065	1.15505	0.366898	-0.00362232	0.338865	0.70293	0.122557	-0.00191133	0.143795	2.20608	0.338814	-0.00268715	0.352659	1.4446	0.607561	-0.00555566	0.574909	0.425913	0.361992	-0.00361375	0.364299	2.17514	0.250868	-0.00399914	0.279805	1.04484	0.157565	-0.00301508	0.175513	0.86075	0.111508	-0.00179908	0.140686	1.11774
133.139	194	194		199	0	0.0372434	-0.000209851	0.0495146	2.55732	0.512736	-0.000691662	0.536364	0.683414	0.577786	0.00184797	0.467065	0.885412	0.363271	-0.00363167	0.335577	0	0.120661	-0.00188175	0.142118	0	0.336121	-0.00269731	0.351386	0.825443	0.602007	-0.00555359	0.57058	0.85408	0.358375	-0.00362058	0.362389	0.695024	0.246878	-0.00398154	0.277029	0.224167	0.154569	-0.00297664	0.172873	0.123114	0.10972	-0.00177719	0.13926	0.280174
52.809	195	195		200	0	0.0370348	-0.000207277	0.0495141	1.46053	0.512073	-0.000635255	0.53621	0.228006	0.579615	0.00180795	0.467065	1.36468	0.359635	-0.00364124	0.33232	0.988986	0.118794	-0.0018526	0.140468	0	0.33342	-0.00270531	0.350124	1.24146	0.596454	-0.00555091	0.566283	1.06854	0.354751	-0.00362698	0.360488	0.957315	0.242905	-0.00396355	0.27428	1.87494	0.151612	-0.0029381	0.170272	0.49289	0.107954	-0.00175489	0.137848	1.40211
38.6226	196	196		201	0	0.0368288	-0.000204669	0.0495137	1.46347	0.511465	-0.000581079	0.536064	0.456929	0.581402	0.00176592	0.467065	0.887977	0.355989	-0.00365111	0.329096	0.424098	0.116956	-0.00182379	0.138844	0	0.330711	-0.0027111	0.348873	1.27373	0.590905	-0.0055476	0.562019	0.428277	0.351121	-0.0036331	0.358597	1.04664	0.238951	-0.00394511	0.271559	1.42683	0.148693	-0.00289943	0.167711	0.617352	0.10621	-0.0017322	0.136451	0.280986
0	197	197		202	0.997077	0.0366255	-0.000202007	0.0495134	0	0.51091	-0.000529143	0.535925	0.228639	0.583146	0.00172202	0.467065	0.956907	0.352333	-0.00366113	0.325902	0.991732	0.115146	-0.00179531	0.137247	0	0.327998	-0.00271446	0.347633	1.21512	0.585359	-0.0055438	0.557787	1.07151	0.347485	-0.00363901	0.356716	0.566585	0.235015	-0.00392608	0.268865	0.976447	0.145813	-0.00286071	0.165188	1.23688	0.104489	-0.00170909	0.135068	1.1248
76.4904	198	198		203	0	0.0364249	-0.000199273	0.049513	1.10512	0.510406	-0.00047905	0.535794	0.690086	0.584845	0.00167638	0.467065	1.30744	0.348667	-0.00367083	0.322739	0.71167	0.113365	-0.00176707	0.135675	0	0.325283	-0.00271515	0.346404	1.01302	0.579818	-0.0055396	0.553587	0.215605	0.343843	-0.00364462	0.354845	1.09759	0.231099	-0.00390628	0.266197	0.528917	0.142972	-0.00282182	0.162703	0.372947	0.102792	-0.00168534	0.133699	1.41455
65.6719	199	199		204	0.0716737	0.036227	-0.000196453	0.0495126	0.738013	0.509952	-0.000429931	0.535669	0.230425	0.586498	0.00162919	0.467065	1.03386	0.344991	-0.00367928	0.319608	1.7138	0.111612	-0.00173869	0.134128	0.745785	0.322569	-0.00271383	0.345186	1.43506	0.57428	-0.00553511	0.549418	0.431952	0.340196	-0.00364928	0.352984	0.79117	0.227203	-0.00388529	0.263556	1.43908	0.14017	-0.00278246	0.160255	0.872954	0.101119	-0.00166091	0.132344	2.27001
66.2441	200	200		205	0.0718018	0.036032	-0.000193539	0.0495123	0	0.509546	-0.000381984	0.535551	0.230836	0.588103	0.0015806	0.467065	0.344545	0.341309	-0.00368576	0.316506	1.28693	0.109888	-0.0017098	0.132606	0.747118	0.319856	-0.00271095	0.343978	1.19673	0.568747	-0.00553046	0.545281	1.08181	0.336545	-0.00365207	0.351133	1.2785	0.223329	-0.00386286	0.260941	0.151434	0.137407	-0.00274262	0.157844	0.623761	0.0994705	-0.00163583	0.131003	0.283903
50.1747	201	201		206	0	0.0358399	-0.00019058	0.049512	1.48365	0.509188	-0.000334851	0.535439	0.347421	0.589659	0.00153094	0.467065	0.761245	0.337621	-0.00369033	0.313435	0.429945	0.108193	-0.00168045	0.131109	0	0.317147	-0.00270605	0.342782	0.899598	0.563219	-0.00552541	0.541175	0.434182	0.332893	-0.003653	0.349291	0.795254	0.219478	-0.00383907	0.258352	0.532563	0.134684	-0.0027024	0.155469	0	0.0978475	-0.00161015	0.129675	0.28486
59.2112	202	202		207	0.0733105	0.0356509	-0.000187501	0.0495117	1.50973	0.508876	-0.000288467	0.535333	0.471374	0.591165	0.00148013	0.467065	0.704273	0.333929	-0.0036931	0.310393	0.437505	0.106527	-0.00165055	0.129635	0	0.314445	-0.00269899	0.341595	1.40611	0.557697	-0.0055198	0.5371	0.662724	0.32924	-0.00365191	0.347459	1.57676	0.215651	-0.00381404	0.255789	1.08386	0.132002	-0.00266185	0.153131	1.02026	0.0962504	-0.00158393	0.12836	1.15947
43.8597	203	203		208	0.0745677	0.035465	-0.000184146	0.0495115	1.53563	0.50861	-0.000242853	0.535232	0.119864	0.592619	0.00142774	0.467065	1.00332	0.330235	-0.0036941	0.307381	1.03984	0.104892	-0.00161983	0.128185	0	0.31175	-0.0026899	0.340419	0.962039	0.55218	-0.00551333	0.533055	0.449393	0.32559	-0.00364861	0.345637	0.502356	0.21185	-0.00378776	0.253251	1.33913	0.129361	-0.0026208	0.150827	1.03776	0.0946798	-0.00155728	0.127059	0
74.0749	204	204		209	0.149131	0.0352826	-0.000180636	0.0495112	0.767788	0.50839	-0.000198456	0.535137	0.239721	0.594019	0.00137299	0.467065	0.644767	0.326541	-0.00369332	0.304398	0.296663	0.103287	-0.0015886	0.126758	0	0.309066	-0.00267901	0.339254	0.682157	0.546671	-0.00550534	0.529041	0.898757	0.321943	-0.00364321	0.343824	0.365462	0.208076	-0.00376014	0.250739	0.551204	0.126761	-0.0025791	0.148558	0.518215	0.0931359	-0.00153032	0.125772	1.17932
43.5899	205	205		210	0.448396	0.0351038	-0.000177007	0.049511	1.15427	0.508213	-0.000155647	0.535046	0.240259	0.595364	0.00131591	0.467065	1.22142	0.322849	-0.00369094	0.301444	1.1908	0.101715	-0.00155698	0.125355	1.55523	0.306393	-0.00266656	0.338098	1.55891	0.54117	-0.00549574	0.525058	2.02899	0.318304	-0.00363573	0.34202	1.2845	0.20433	-0.00373128	0.248251	1.02607	0.124203	-0.0025368	0.146323	1.1699	0.0916192	-0.00150309	0.124497	0
42.73	206	206		211	0.0747783	0.0349286	-0.000173265	0.0495108	0.769981	0.508078	-0.000114729	0.53496	0.240406	0.59665	0.001257	0.467065	0.718374	0.31916	-0.00368709	0.298519	1.04277	0.100174	-0.00152505	0.123973	0.778089	0.303733	-0.00265254	0.336953	1.40294	0.53568	-0.0054843	0.521104	0.450662	0.314673	-0.00362605	0.340226	0.825439	0.200614	-0.00370128	0.245788	1.42255	0.121687	-0.00249392	0.144122	0.649619	0.0901298	-0.00147564	0.123235	1.77403
31.2707	207	207		212	0.225383	0.0347573	-0.000169384	0.0495105	0.38679	0.507983	-7.59731e-05	0.534879	1.57236	0.597877	0.00119654	0.467065	0.505428	0.315475	-0.0036818	0.295622	1.04765	0.0986647	-0.00149283	0.122614	1.56345	0.301088	-0.00263689	0.335818	1.69333	0.530202	-0.00547095	0.51718	1.58695	0.311052	-0.00361423	0.338442	1.15247	0.196928	-0.00367019	0.243349	1.19074	0.119215	-0.00245058	0.141953	1.69951	0.088668	-0.00144805	0.121986	0.891162
40.7495	208	208		213	0.075152	0.0345899	-0.000165304	0.0495103	1.54766	0.507925	-3.97425e-05	0.534802	0.483214	0.599043	0.00113484	0.467065	1.01118	0.311797	-0.00367456	0.292753	1.04798	0.097188	-0.00146034	0.121277	0.781978	0.29846	-0.00261977	0.334693	1.78862	0.524738	-0.0054557	0.513285	0.905828	0.307445	-0.00360053	0.336667	1.94102	0.193274	-0.00363783	0.240935	1.90754	0.116786	-0.00240686	0.139818	0.915318	0.0872338	-0.00142035	0.12075	1.48575
77.2421	209	209		214	0.22675	0.0344268	-0.000161035	0.0495102	1.16741	0.507903	-5.61813e-06	0.534728	0.242994	0.600147	0.00107207	0.467065	1.01699	0.308127	-0.00366498	0.289912	0.601426	0.095744	-0.00142767	0.119961	0.786467	0.295849	-0.00260146	0.333577	1.25976	0.519291	-0.00543839	0.50942	0.227757	0.303852	-0.00358496	0.334901	1.0665	0.189653	-0.00360393	0.238545	1.59808	0.114402	-0.0023627	0.137714	0.393968	0.0858273	-0.00139247	0.119526	0.597711
55.9634	210	210		215	0.151407	0.0342679	-0.000156592	0.04951	1.55902	0.507913	2.67253e-05	0.534659	0.730142	0.601187	0.00100824	0.467065	0.945952	0.304468	-0.00365297	0.287099	0.752979	0.0943328	-0.00139486	0.118666	2.36316	0.293257	-0.00258201	0.332472	1.3886	0.513862	-0.00541896	0.505584	1.1406	0.300276	-0.00356753	0.333144	0.881977	0.186067	-0.00356839	0.236178	1.11924	0.112061	-0.00231811	0.135643	0.526127	0.0844489	-0.00136438	0.118314	0.598662
41.4921	211	211		216	0.230435	0.0341136	-0.000151966	0.0495098	1.18637	0.507956	5.8143e-05	0.534593	0	0.602163	0.000943902	0.467065	0.886078	0.300822	-0.0036387	0.284313	0.458399	0.0929544	-0.00136186	0.117391	0.799245	0.290686	-0.00256071	0.331376	1.21588	0.508454	-0.00539755	0.501777	0.462915	0.296717	-0.00354834	0.331397	0.989353	0.182517	-0.00353124	0.233835	1.46123	0.109766	-0.00227314	0.133602	1.20244	0.0830986	-0.00133619	0.117115	0.911134
63.39	212	212		217	0.153897	0.0339641	-0.00014714	0.0495097	1.18849	0.508029	8.92622e-05	0.534531	0	0.603075	0.000879254	0.467065	1.25764	0.297191	-0.00362221	0.281554	1.07303	0.0916091	-0.00132854	0.116138	0	0.288136	-0.00253732	0.33029	1.70214	0.503068	-0.00537421	0.497999	0.695611	0.29318	-0.00352732	0.329659	0.991117	0.179005	-0.00349239	0.231515	0.893396	0.107515	-0.00222782	0.131592	1.07089	0.0817765	-0.00130795	0.115928	1.82552
69.8265	213	213		218	0.153882	0.0338194	-0.000142137	0.0495095	0.792248	0.508134	0.000120075	0.534471	0.247358	0.603921	0.000814398	0.467065	0.739149	0.293578	-0.00360349	0.278822	1.5321	0.0902974	-0.00129496	0.114904	0.800591	0.285612	-0.00251204	0.329213	0.671662	0.497706	-0.00534888	0.494249	0.231847	0.289663	-0.00350465	0.32793	1.51219	0.175533	-0.00345191	0.229218	1.38175	0.10531	-0.00218222	0.129613	0.534724	0.0804827	-0.00127972	0.114753	0.912668
159.363	214	214		219	0.0772673	0.0336798	-0.000136968	0.0495094	0.79561	0.50827	0.000150577	0.534415	0.745223	0.604703	0.000749392	0.467065	0.519822	0.289985	-0.00358255	0.276116	0	0.0890193	-0.00126114	0.11369	0	0.283113	-0.00248495	0.328146	0.578062	0.492371	-0.00532153	0.490527	0.931325	0.286171	-0.00348045	0.32621	0.473264	0.172102	-0.00340981	0.226943	0.734138	0.103151	-0.00213636	0.127663	0.134248	0.0792171	-0.00125153	0.11359	0.305514
59.5911	215	215		220	0.155235	0.0335455	-0.000131634	0.0495093	0.399607	0.508435	0.000180766	0.534362	0.249533	0.60542	0.000684236	0.467065	1.3438	0.286414	-0.00355937	0.273437	0.463207	0.0877752	-0.00122709	0.112496	0	0.280642	-0.00245607	0.327088	1.48872	0.487064	-0.00529216	0.486833	0.935543	0.282703	-0.00345471	0.324499	0.332927	0.168713	-0.00336611	0.224692	1.2302	0.101037	-0.00209026	0.125742	0.269713	0.0779796	-0.00122337	0.112439	2.76515
46.249	216	216		221	0.0778688	0.0334166	-0.000126134	0.0495091	1.20271	0.508631	0.000210644	0.534312	0.500683	0.606072	0.000618928	0.467065	1.42289	0.282867	-0.00353396	0.270783	1.39567	0.0865652	-0.00119281	0.11132	0	0.278201	-0.00242538	0.32604	1.46093	0.481787	-0.00526077	0.483167	1.17322	0.279262	-0.00342742	0.322797	0.716136	0.16537	-0.00332081	0.222463	1.15125	0.0989702	-0.00204391	0.12385	0.135293	0.0767703	-0.00119526	0.111299	1.23157
38.6705	217	217		222	0.0787503	0.0332933	-0.000120481	0.049509	0.81088	0.508856	0.000240184	0.534264	1.01397	0.606658	0.0005536	0.467065	1.0596	0.279346	-0.00350654	0.268156	0.939938	0.0853896	-0.00115837	0.110164	0	0.275792	-0.00239313	0.325	1.04899	0.476543	-0.00522745	0.479529	0.711899	0.275849	-0.00339879	0.321104	0.724243	0.162072	-0.00327403	0.220255	1.99887	0.0969496	-0.00199739	0.121987	0.82095	0.0755891	-0.00116724	0.110171	1.86826
193.199	218	218		223	0	0.0331757	-0.000114684	0.0495089	0.812912	0.509111	0.000269214	0.534218	1.27032	0.607179	0.000488384	0.467065	0.531127	0.275854	-0.00347741	0.265553	0.314098	0.0842485	-0.00112386	0.109026	0.821473	0.273416	-0.00235963	0.32397	0.689181	0.471333	-0.00519223	0.475918	0.951578	0.272465	-0.00336908	0.31942	0.0483073	0.158822	-0.00322598	0.21807	0.166505	0.0949754	-0.00195083	0.120152	0.548672	0.0744358	-0.00113941	0.109054	0.312158
76.7196	219	219		224	0	0.033064	-0.00010874	0.0495088	1.22455	0.509395	0.000297799	0.534175	0.509778	0.607635	0.000423268	0.467065	0.837742	0.272392	-0.00344658	0.262976	0.788584	0.0831419	-0.00108929	0.107906	1.64993	0.271073	-0.00232492	0.322949	1.38784	0.466159	-0.00515514	0.472334	1.19453	0.269111	-0.00333824	0.317744	0.729146	0.155621	-0.00317667	0.215907	0.586081	0.0930479	-0.0019042	0.118344	0.275502	0.0733102	-0.00111178	0.107949	0.940455
72.3594	220	220		225	0.239316	0.0329583	-0.000102622	0.0495087	0.410699	0.509707	0.000326574	0.534134	1.02712	0.608026	0.00035805	0.467065	0.996785	0.268962	-0.00341411	0.260424	1.11241	0.0820699	-0.00105458	0.106805	0	0.268766	-0.00228926	0.321937	0.76287	0.461023	-0.00511632	0.468777	1.92543	0.265789	-0.00330604	0.316078	0.635527	0.152469	-0.00312625	0.213764	1.26435	0.0911671	-0.00185754	0.116564	0.4158	0.0722121	-0.00108442	0.106855	0.630833
60.6099	221	221		226	0	0.0328588	-9.63564e-05	0.0495086	0	0.510048	0.000356037	0.534096	0.256987	0.608351	0.000292168	0.467065	1.07555	0.265564	-0.0033801	0.257897	1.43273	0.0810328	-0.0010198	0.105721	0	0.266495	-0.00225294	0.320934	1.06478	0.455927	-0.00507572	0.465247	0.240873	0.262499	-0.00327241	0.31442	1.12791	0.149369	-0.00307489	0.211644	1.26695	0.0893328	-0.00181091	0.11481	0.55554	0.0711412	-0.00105741	0.105772	0.316066
155.566	222	222		227	0.16007	0.0327656	-8.99682e-05	0.0495085	0.824107	0.510419	0.000385872	0.534059	0.771915	0.60861	0.000225281	0.467065	0.307242	0.262202	-0.00334459	0.255395	0	0.0800303	-0.000985018	0.104654	0	0.26426	-0.00221618	0.319939	0.66548	0.450872	-0.00503323	0.461744	1.69061	0.259244	-0.00323752	0.312771	0.097945	0.14632	-0.00302271	0.209544	0.337595	0.0875452	-0.0017644	0.113083	0.41717	0.0700972	-0.0010308	0.1047	1.89874
98.6071	223	223		228	0.0806162	0.0326789	-8.3463e-05	0.0495085	1.24514	0.51082	0.000415995	0.534024	0.129587	0.608801	0.000157324	0.467065	0.697089	0.258876	-0.00330761	0.252916	0.641473	0.0790627	-0.000950243	0.103604	1.67767	0.262063	-0.00217902	0.318954	0.939109	0.445861	-0.00498889	0.458267	0.97169	0.256025	-0.00320141	0.31113	1.48527	0.143323	-0.00296974	0.207465	1.44775	0.085804	-0.00171801	0.111382	0.560268	0.0690795	-0.00100461	0.103638	0.956265
0	224	224		229	1.6168	0.0325987	-7.68663e-05	0.0495084	0.415161	0.511251	0.00044601	0.533991	0.259246	0.608924	8.79984e-05	0.467065	1.31795	0.255587	-0.00326925	0.250462	0.962475	0.0781298	-0.000915538	0.102571	1.67813	0.259902	-0.00214166	0.317976	1.10791	0.440895	-0.004943	0.454816	0.24299	0.252842	-0.00316429	0.309498	0.79095	0.140381	-0.00291609	0.205406	0.681133	0.0841091	-0.00167182	0.109706	0.840634	0.0680878	-0.000978891	0.102588	0
54.4987	225	225		230	0.080686	0.0325252	-7.01797e-05	0.0495083	0	0.511712	0.000475713	0.53396	0.259398	0.608977	1.75975e-05	0.467065	0.930773	0.252338	-0.0032298	0.248031	1.44617	0.0772316	-0.000881047	0.101555	2.51868	0.257779	-0.00210442	0.317008	0.872665	0.435976	-0.0048958	0.451391	1.94749	0.249696	-0.0031263	0.307875	1.03926	0.137491	-0.00286197	0.203368	1.1929	0.0824603	-0.00162597	0.108056	0.560752	0.0671216	-0.000953641	0.101548	0.957093
55.5697	226	226		231	0.161557	0.0324584	-6.34658e-05	0.0495082	0	0.512203	0.000506589	0.53393	0.51939	0.608959	-5.21764e-05	0.467065	0.853538	0.249128	-0.0031894	0.245624	1.28713	0.0763676	-0.000847116	0.100555	0.840521	0.255694	-0.00206675	0.316048	1.88869	0.431104	-0.00484703	0.447992	0.730232	0.24659	-0.00308704	0.30626	1.09037	0.134657	-0.00280764	0.201351	1.2803	0.0808569	-0.00158076	0.10643	0.701742	0.0661803	-0.000928955	0.100519	0.638792
40.5628	227	227		232	0.162452	0.0323983	-5.67583e-05	0.0495082	2.09093	0.512725	0.000538535	0.533902	0.652835	0.608872	-0.000121085	0.467065	1.01495	0.245959	-0.00314815	0.243241	0.807905	0.0755371	-0.000813918	0.0995713	0	0.253646	-0.0020281	0.315096	1.76273	0.426282	-0.00479666	0.444619	1.71576	0.243523	-0.00304671	0.304654	0.796711	0.131876	-0.00275324	0.199353	1.54521	0.0792985	-0.00153612	0.104829	0.564505	0.0652635	-0.000904741	0.0995002	0
53.0522	228	228		233	0.162889	0.0323449	-5.00561e-05	0.0495081	0.838621	0.51328	0.000571263	0.533875	0	0.608717	-0.000189225	0.467065	1.17479	0.242832	-0.00310614	0.24088	1.29775	0.0747395	-0.000781496	0.0986031	0	0.251638	-0.00198835	0.314153	1.73303	0.421511	-0.00474471	0.441271	0.736255	0.240496	-0.00300547	0.303056	1.35003	0.12915	-0.00269885	0.197375	1.46263	0.0777845	-0.00149203	0.103252	0.566024	0.0643707	-0.000880976	0.0984917	0
56.941	229	229		234	0	0.0322981	-4.33708e-05	0.0495081	0	0.513868	0.000604775	0.53385	0.525326	0.608494	-0.00025664	0.467065	1.0209	0.239747	-0.00306346	0.238543	1.46437	0.0739739	-0.000749812	0.0976504	0	0.24967	-0.00194759	0.313218	1.49861	0.416793	-0.00469133	0.437948	0.492385	0.237512	-0.00296338	0.301466	1.10283	0.126478	-0.00264452	0.195417	1.38108	0.0763143	-0.00144852	0.101699	0.709762	0.0635014	-0.000857685	0.0974934	0.323046
44.0838	230	230		235	0.08171	0.0322581	-3.67228e-05	0.049508	1.26203	0.51449	0.00063908	0.533826	0.131345	0.608204	-0.000323406	0.467065	0.628129	0.236705	-0.00302026	0.236228	0.975264	0.0732396	-0.000718799	0.096713	0.850216	0.247743	-0.00190597	0.312292	1.22497	0.412129	-0.00463677	0.43465	0	0.23457	-0.0029206	0.299885	0.901955	0.123861	-0.00259032	0.193478	1.29506	0.0748873	-0.00140562	0.100169	0.567869	0.0626552	-0.000834906	0.0965053	0
59.4013	231	231		236	0.163609	0.0322247	-3.01144e-05	0.049508	1.68466	0.515147	0.000674146	0.533803	0.921797	0.607848	-0.000389515	0.467065	1.17999	0.233707	-0.00297655	0.233936	0.813661	0.072536	-0.000688461	0.0957907	0	0.245858	-0.00186351	0.311373	1.67216	0.40752	-0.00458104	0.431377	0.986014	0.231671	-0.00287714	0.298312	1.55722	0.121298	-0.00253627	0.191559	1.03691	0.0735028	-0.00136335	0.098662	1.28061	0.0618314	-0.000812627	0.0955271	1.29382
0	232	232		237	1.07172	0.0321979	-2.35681e-05	0.0495079	0.847566	0.515838	0.000709307	0.533781	1.72274	0.607425	-0.000454724	0.467065	1.18732	0.230752	-0.00293246	0.231666	0.982463	0.0718625	-0.000658735	0.0948831	1.71298	0.244016	-0.00182049	0.310463	1.33744	0.402967	-0.00452417	0.428129	0.744108	0.228816	-0.00283305	0.296748	0.403436	0.118788	-0.00248238	0.189658	1.74037	0.0721604	-0.00132173	0.0971777	2.00507	0.0610298	-0.000790684	0.0945589	0.65093
98.7759	233	233		238	0.0824238	0.0321775	-1.7115e-05	0.0495079	0.848705	0.516565	0.000744052	0.533761	0.397478	0.606939	-0.000517797	0.467065	0.791822	0.227842	-0.00288811	0.229417	0.491892	0.0712184	-0.000629595	0.09399	1.71529	0.242217	-0.00177695	0.30956	0.788231	0.398472	-0.00446629	0.424905	0.496738	0.226005	-0.00278851	0.295191	0.909834	0.116333	-0.00242882	0.187776	0.260754	0.0708591	-0.00128085	0.0957158	0.859245	0.06025	-0.000768924	0.0936005	0.325902
116.697	234	234		239	0	0.0321636	-1.08006e-05	0.0495078	0.853747	0.517326	0.000777705	0.533742	0.13328	0.606391	-0.000578271	0.467065	0.716953	0.224976	-0.00284378	0.227191	0.329876	0.0706031	-0.000601141	0.0931113	0.862738	0.240462	-0.00173314	0.308665	0.827643	0.394035	-0.00440775	0.421705	0.999379	0.223239	-0.00274375	0.293643	0.55858	0.113931	-0.00237574	0.185913	0.875218	0.0695984	-0.00124081	0.0942758	0.576233	0.0594919	-0.000747332	0.0926518	1.63919
169.526	235	235		240	0.166182	0.0321559	-4.64428e-06	0.0495078	0	0.51812	0.000809952	0.533723	0.93629	0.605783	-0.000636334	0.467065	0.958514	0.222154	-0.00279961	0.224986	0.330582	0.0700158	-0.000573417	0.0922466	0	0.238751	-0.00168922	0.307779	0.41419	0.389657	-0.00434873	0.41853	1.75516	0.220518	-0.00269888	0.292103	0.152527	0.111581	-0.00232322	0.184069	0.175243	0.0683772	-0.00120167	0.0928575	0	0.0587553	-0.000725934	0.0917127	0.657079
55.8061	236	236		241	0	0.0321542	1.35387e-06	0.0495078	2.57048	0.518945	0.000840794	0.533706	0.267521	0.605119	-0.000691988	0.467065	0.799399	0.219377	-0.00275559	0.222803	0.165533	0.069456	-0.000546422	0.0913958	0	0.237084	-0.00164519	0.3069	1.21299	0.385338	-0.00428925	0.415378	0.752237	0.217841	-0.00265392	0.290571	0.76528	0.109284	-0.00227126	0.182242	1.40663	0.0671948	-0.00116341	0.0914606	0.722889	0.05804	-0.000704729	0.0907832	1.31608
54.4189	237	237		242	0.084688	0.0321585	7.1798e-06	0.0495077	0.87202	0.519801	0.000870003	0.533689	0.680661	0.6044	-0.000745496	0.467065	0.651022	0.216643	-0.0027118	0.220641	1.18096	0.0689227	-0.000520188	0.0905587	1.76241	0.235461	-0.00160116	0.306029	1.30509	0.381078	-0.00422943	0.41225	2.29928	0.21521	-0.00260895	0.289047	1.97796	0.107039	-0.0022199	0.180434	1.16276	0.0660501	-0.00112606	0.0900847	0.588566	0.0573457	-0.000683742	0.089863	1.67427
46.2054	238	238		243	0.0848638	0.0321685	1.28155e-05	0.0495077	0.87383	0.520685	0.000897289	0.533673	0	0.603628	-0.000797198	0.467065	0.570928	0.213953	-0.00266831	0.2185	0.844089	0.0684153	-0.000494753	0.0897349	0	0.233882	-0.00155725	0.305165	0.953396	0.376879	-0.0041694	0.409146	0	0.212623	-0.0025641	0.287531	1.45864	0.104844	-0.0021692	0.178644	0.716823	0.0649423	-0.00108968	0.0887294	0.884681	0.0566724	-0.000663007	0.0889522	0.33555
78.6681	239	239		244	0.170466	0.0321841	1.82545e-05	0.0495077	0.438816	0.521595	0.000922547	0.533659	0.137009	0.602806	-0.000847002	0.467065	0.490796	0.211306	-0.00262516	0.21638	0.847762	0.067933	-0.000470131	0.0889244	0	0.232346	-0.00151351	0.304309	0.992892	0.37274	-0.00410925	0.406065	0	0.210081	-0.0025194	0.286023	1.30748	0.1027	-0.0021192	0.176872	1.3509	0.0638704	-0.00105426	0.0873946	0	0.0560196	-0.000642533	0.0880506	0
74.3752	240	240		245	0	0.032205	2.34733e-05	0.0495076	1.33017	0.522529	0.000945395	0.533644	0.970438	0.601935	-0.000894565	0.467065	0.579388	0.208702	-0.00258253	0.21428	0.685277	0.0674748	-0.000446371	0.0881268	2.68835	0.230854	-0.00147011	0.303461	1.2911	0.36866	-0.00404919	0.403007	0.519022	0.207584	-0.00247502	0.284522	0.686111	0.100605	-0.00206995	0.175117	0.727445	0.0628335	-0.00101985	0.0860798	0.598527	0.0553872	-0.000622364	0.0871582	0.681044
111.72	241	241		246	0	0.032231	2.84695e-05	0.0495076	0.887631	0.523485	0.000965798	0.533631	0.554277	0.601018	-0.000939854	0.467065	0.248193	0.206141	-0.00254041	0.2122	0.514452	0.0670399	-0.000423479	0.087342	0.896978	0.229406	-0.00142708	0.30262	1.0042	0.364641	-0.00398924	0.399973	1.2988	0.205131	-0.00243097	0.28303	0.951563	0.0985597	-0.00202148	0.17338	0.63724	0.0618304	-0.000986462	0.0847848	0.599102	0.0547748	-0.000602501	0.0862748	0.34085
52.6871	242	242		247	0.261046	0.0322618	3.32434e-05	0.0495076	1.79196	0.52446	0.000983756	0.533618	0.139873	0.600056	-0.00098287	0.467065	1.42217	0.203621	-0.00249881	0.210141	1.03858	0.0666275	-0.000401454	0.0865698	0	0.228	-0.0013844	0.301786	1.55963	0.360682	-0.00392942	0.396961	0.524409	0.202722	-0.00238725	0.281546	1.01376	0.0965622	-0.00197377	0.171659	1.10295	0.0608602	-0.000954093	0.0835093	1.05981	0.0541821	-0.000582946	0.0854003	1.37623
176.16	243	243		248	0.0875776	0.0322974	3.77947e-05	0.0495076	1.35266	0.525452	0.000999268	0.533606	0.422331	0.599053	-0.00102361	0.467065	0.589185	0.201143	-0.00245773	0.208102	0.522649	0.0662367	-0.000380296	0.08581	1.82254	0.226637	-0.00134209	0.30096	0.545876	0.356782	-0.00386972	0.393971	0.791698	0.200357	-0.00234385	0.280069	1.23573	0.0946119	-0.00192684	0.169956	0.554117	0.0599219	-0.000922744	0.082253	0.304324	0.0536088	-0.000563699	0.0845347	0.34628
98.8322	244	244		249	0.0881273	0.0323373	4.21219e-05	0.0495075	1.36115	0.526458	0.00101238	0.533595	0.566643	0.59801	-0.00106207	0.467065	0.592884	0.198706	-0.00241716	0.206083	1.22892	0.0658667	-0.00036	0.0850623	0	0.225316	-0.00130014	0.300141	0.769315	0.352942	-0.00381013	0.391005	1.59333	0.198034	-0.0023008	0.2786	0.81048	0.0927083	-0.00188067	0.16827	1.20998	0.0590144	-0.000892406	0.0810156	1.22647	0.0530546	-0.000544762	0.0836779	0.348454
45.7677	245	245		250	0.0881306	0.0323815	4.62018e-05	0.0495075	0.453734	0.527476	0.00102365	0.533584	0.566665	0.596929	-0.00109812	0.467065	1.01665	0.196309	-0.00237676	0.204083	1.22897	0.0655165	-0.000340488	0.0843267	0	0.224036	-0.00125873	0.299329	1.17394	0.349162	-0.00375056	0.38806	0.531132	0.195755	-0.00225822	0.277139	0.864437	0.0908504	-0.00183525	0.166601	1.02323	0.0581368	-0.000862977	0.0797968	0.765614	0.0525192	-0.000526173	0.0828298	1.74233
59.5152	246	246		251	0.0883143	0.0324297	5.00269e-05	0.0495075	1.36404	0.528504	0.00103329	0.533574	0.141961	0.595814	-0.00113171	0.467065	1.18828	0.193952	-0.00233645	0.202102	0.527045	0.0651854	-0.000321734	0.0836028	0.918935	0.222798	-0.0012179	0.298524	0.99216	0.345441	-0.003691	0.385138	0.532238	0.193518	-0.00221618	0.275685	1.24613	0.0890375	-0.00179057	0.164948	0.558778	0.0572881	-0.000834423	0.0785963	0.460326	0.0520021	-0.000507945	0.0819903	0
102.31	247	247		252	0	0.0324815	5.35972e-05	0.0495075	0.917494	0.529542	0.00104128	0.533564	0.429694	0.594667	-0.00116285	0.467065	0.770486	0.191636	-0.00229623	0.200141	0.709014	0.0648728	-0.000303738	0.0828905	0	0.2216	-0.00117766	0.297726	2.15838	0.34178	-0.00363143	0.382238	0.2685	0.191322	-0.00217466	0.274239	0.764399	0.087269	-0.00174662	0.163311	0.65868	0.0564676	-0.000806745	0.0774139	0.774074	0.0515032	-0.000490078	0.0811593	0
46.3798	248	248		253	0.179915	0.0325368	5.69127e-05	0.0495075	0.926277	0.530586	0.00104762	0.533555	0.144602	0.593489	-0.00119154	0.467065	1.03772	0.18936	-0.0022561	0.198199	1.0737	0.0645777	-0.0002865	0.0821896	0.936031	0.220443	-0.001138	0.296936	1.04792	0.338178	-0.00357187	0.37936	1.62642	0.189168	-0.00213366	0.272801	1.10363	0.085544	-0.00170342	0.161691	0.949572	0.0556743	-0.000779943	0.0762493	1.09564	0.0510219	-0.000472571	0.0803367	0.35569
42.9118	249	249		254	0	0.0325952	5.99734e-05	0.0495074	0.930154	0.531636	0.00105232	0.533546	0.580831	0.592285	-0.00121776	0.467065	0.867812	0.187124	-0.00221605	0.196276	0.359399	0.0642995	-0.000270021	0.0815	0.93995	0.219324	-0.00109893	0.296152	1.05231	0.334636	-0.0035123	0.376503	0.272205	0.187055	-0.0020932	0.27137	0.498022	0.0838619	-0.00166095	0.160087	1.90995	0.0549074	-0.000754017	0.0751022	0.470853	0.0505579	-0.000455426	0.0795224	0.714357
49.2515	250	250		255	0.18159	0.0326566	6.28037e-05	0.0495074	1.8698	0.53269	0.00105556	0.533538	0.583795	0.591055	-0.00124152	0.467065	1.22166	0.184928	-0.00217614	0.194371	1.62735	0.0640374	-0.00025429	0.0808214	0	0.218245	-0.00106017	0.295375	1.17139	0.331154	-0.00345284	0.373668	0.547188	0.184982	-0.00205316	0.269946	0.946127	0.0822219	-0.00161925	0.158498	0.862667	0.054166	-0.000728935	0.0739724	1.10584	0.0501109	-0.00043859	0.0787164	0.718003
57.213	251	251		256	0	0.0327208	6.54741e-05	0.0495074	1.40345	0.533747	0.0010576	0.53353	0.146063	0.589802	-0.00126304	0.467065	1.57318	0.182771	-0.00213661	0.192485	0.903786	0.0637907	-0.000239142	0.0801537	0	0.217204	-0.00102087	0.294605	1.40029	0.32773	-0.00339399	0.370854	1.64284	0.182949	-0.00201328	0.268531	0.779509	0.0806231	-0.00157836	0.156926	0.6717	0.0534493	-0.000704612	0.0728595	0.94725	0.0496807	-0.000421912	0.0779185	1.07784
78.313	252	252		257	0	0.0327875	6.79873e-05	0.0495074	1.87984	0.534805	0.00105838	0.533522	0	0.588529	-0.00128244	0.467065	1.22822	0.180654	-0.00209749	0.190617	0.907928	0.063559	-0.000224519	0.0794967	0	0.216203	-0.000980844	0.293842	0.606821	0.324366	-0.00333584	0.368062	0.825186	0.180955	-0.00197351	0.267122	1.23215	0.0790649	-0.00153826	0.155369	1.54304	0.0527565	-0.000681035	0.0717634	0.475795	0.049267	-0.000405363	0.0771288	1.08278
49.2936	253	253		258	0	0.0328567	7.03616e-05	0.0495074	0.943614	0.535864	0.00105816	0.533515	0.736545	0.587238	-0.0012995	0.467065	1.32187	0.178576	-0.00205856	0.188767	0.729198	0.0633415	-0.00021047	0.0788502	2.86065	0.215243	-0.00093945	0.293086	1.41224	0.321059	-0.00327824	0.36529	0.828431	0.179002	-0.00193345	0.265721	1.01158	0.0775463	-0.00149899	0.153827	1.06398	0.052087	-0.000658121	0.0706838	0.477666	0.0488699	-0.000388839	0.0763471	1.81174
123.949	254	254		259	0.0921847	0.0329282	7.25765e-05	0.0495074	0.474606	0.536921	0.00105658	0.533509	0.296366	0.585931	-0.0013145	0.467065	0.442354	0.176537	-0.00201989	0.186935	0.916906	0.0631378	-0.000196955	0.0782141	0	0.214325	-0.000896763	0.292336	0.99703	0.317809	-0.00322132	0.362539	0.833346	0.177088	-0.00189318	0.264327	0.62104	0.0760666	-0.00146055	0.152301	0.291633	0.0514401	-0.000635896	0.0696205	0	0.0484893	-0.00037236	0.0755732	0.364497
67.1678	255	255		260	0.186636	0.0330018	7.46229e-05	0.0495074	1.44132	0.537976	0.00105278	0.533502	0.150004	0.58461	-0.00132772	0.467065	1.07649	0.174536	-0.0019816	0.185121	0.556906	0.0629475	-0.000183903	0.0775882	0	0.21345	-0.000852948	0.291592	0.9702	0.314616	-0.00316548	0.359809	0	0.175215	-0.0018529	0.262941	0.743445	0.0746249	-0.00142297	0.15079	1.47904	0.050815	-0.000614383	0.0685731	0.162135	0.0481252	-0.000355928	0.0748072	2.21386
107.358	256	256		261	0.0936253	0.0330774	7.64711e-05	0.0495074	0.482023	0.539026	0.00104798	0.533496	0.150499	0.583276	-0.00133972	0.467065	0.719725	0.172574	-0.00194389	0.183325	0	0.0627698	-0.000171409	0.0769723	0	0.212619	-0.000808295	0.290856	0.973395	0.311477	-0.00311108	0.3571	1.12849	0.173382	-0.00181269	0.261562	0.516168	0.0732203	-0.00138636	0.149294	1.28547	0.0502111	-0.000593635	0.0675415	0.813348	0.0477775	-0.000339576	0.074049	1.48077
26.8813	257	257		262	0.187635	0.0331547	7.81315e-05	0.0495073	0.966025	0.540072	0.0010431	0.533491	0.301615	0.581931	-0.00135093	0.467065	1.26233	0.170648	-0.00190686	0.181546	0.186629	0.0626045	-0.000159426	0.0763663	0.976198	0.211833	-0.000763023	0.290125	1.32828	0.308393	-0.00305807	0.354411	0.848106	0.17159	-0.00177264	0.26019	0.402416	0.0718519	-0.00135073	0.147813	1.08925	0.0496275	-0.000573639	0.0665254	0	0.047446	-0.000323353	0.0732985	0.741906
58.217	258	258		263	0.0939991	0.0332336	7.96704e-05	0.0495073	1.45184	0.541113	0.00103812	0.533485	0.151099	0.580574	-0.00136154	0.467065	0.451061	0.16876	-0.00187054	0.179784	0.747962	0.0624509	-0.000147779	0.0757699	0	0.211093	-0.000717272	0.289401	1.60606	0.305361	-0.0030062	0.351742	1.41625	0.169837	-0.00173285	0.258825	1.26883	0.0705186	-0.00131596	0.146346	0.793987	0.0490636	-0.000554303	0.0655246	0.979915	0.0471307	-0.00030729	0.0725556	0.371671
45.548	259	259		264	0.0942767	0.033314	8.11104e-05	0.0495073	0.485376	0.542148	0.0010331	0.53348	0.303091	0.579208	-0.00137168	0.467065	0.815211	0.166907	-0.00183501	0.178039	0.937713	0.0623088	-0.000136471	0.0751832	2.94293	0.210399	-0.000671195	0.288684	1.21632	0.30238	-0.00295558	0.349094	0	0.168124	-0.00169341	0.257468	1.38852	0.0692197	-0.00128191	0.144894	0.895749	0.0485187	-0.000535596	0.0645388	0.163801	0.0468314	-0.000291421	0.0718202	0.745537
99.5336	260	260		265	0	0.0333958	8.24372e-05	0.0495073	1.95734	0.543179	0.001028	0.533475	0.611127	0.577831	-0.00138162	0.467065	0.639427	0.165089	-0.0018005	0.176312	0.756289	0.0621778	-0.000125491	0.0746058	0.988977	0.209751	-0.000625165	0.287973	1.30586	0.299449	-0.00290646	0.346465	0.572806	0.16645	-0.0016544	0.256117	1.10732	0.0679546	-0.00124846	0.143457	1.00328	0.0479921	-0.000517539	0.0635679	0.66055	0.0465478	-0.000275829	0.0710922	1.12743
79.0222	261	261		266	0.0950379	0.0334788	8.3617e-05	0.0495073	0	0.544204	0.00102329	0.53347	0.611077	0.576445	-0.00139134	0.467065	0.364836	0.163305	-0.00176716	0.174601	0.378114	0.0620577	-0.000114891	0.0740377	0	0.209149	-0.00057906	0.287268	0.790229	0.296567	-0.00285899	0.343856	1.4319	0.164815	-0.00161596	0.254774	0.348916	0.0667226	-0.00121562	0.142033	1.0032	0.0474833	-0.000500182	0.0626116	0.330248	0.0462796	-0.000260563	0.0703717	0.751556
0	262	262		267	0.476199	0.033563	8.46287e-05	0.0495073	1.47101	0.545226	0.00101936	0.533466	0.459282	0.575049	-0.0014008	0.467065	0.82354	0.161554	-0.00173509	0.172906	1.13675	0.0619479	-0.00010471	0.0734787	0	0.208593	-0.000532676	0.286569	1.06996	0.293731	-0.00281324	0.341267	0	0.163218	-0.00157816	0.253438	0.817033	0.0655232	-0.00118337	0.140624	1.10577	0.0469915	-0.000483555	0.0616697	0.827374	0.0460265	-0.000245652	0.0696584	0
33.0001	263	263		268	0.0956856	0.033648	8.54472e-05	0.0495073	0.98526	0.546243	0.00101582	0.533462	0.615242	0.573643	-0.00141046	0.467065	0.367323	0.159835	-0.00170442	0.171228	0.571036	0.0618481	-9.49955e-05	0.0729287	0.995636	0.208083	-0.000486172	0.285876	1.91582	0.290939	-0.00276935	0.338697	0.576663	0.161658	-0.00154115	0.252108	1.11477	0.0643556	-0.00115177	0.139229	1.11094	0.046516	-0.000467693	0.0607419	0.498748	0.0457882	-0.00023113	0.0689524	0
57.5616	264	264		269	0.0970039	0.0337338	8.60748e-05	0.0495073	1.49825	0.547257	0.00101257	0.533458	0.467788	0.572228	-0.00142034	0.467065	1.3052	0.158145	-0.00167511	0.169567	0	0.0617578	-8.57481e-05	0.0723874	1.00935	0.20762	-0.000439588	0.28519	1.98285	0.288191	-0.00272729	0.336146	0.584607	0.160135	-0.0015049	0.250786	0.59415	0.0632194	-0.00112081	0.137848	1.33186	0.0460559	-0.000452606	0.0598281	0.16854	0.0455641	-0.000216995	0.0682535	0
117.409	265	265		270	0.0981229	0.0338201	8.65715e-05	0.0495073	1.01036	0.548268	0.00100943	0.533454	0.315456	0.570802	-0.00143016	0.467065	0.848469	0.156484	-0.00164674	0.167921	0	0.0616765	-7.69234e-05	0.0718549	0	0.207204	-0.000393005	0.284509	1.59432	0.285484	-0.00268679	0.333615	0.591351	0.158649	-0.00146903	0.249471	0.962447	0.0621138	-0.0010904	0.13648	0.932292	0.0456105	-0.000438338	0.058928	0	0.0453541	-0.000203199	0.0675617	0.775952
39.7642	266	266		271	0.0995564	0.0339069	8.69536e-05	0.0495073	0.512558	0.549276	0.00100648	0.533451	0.320065	0.569367	-0.00143934	0.467065	1.43605	0.154851	-0.00161929	0.166292	0.990227	0.0616038	-6.85508e-05	0.0713309	1.03591	0.206834	-0.000346248	0.283835	1.49252	0.282817	-0.00264793	0.331103	1.19998	0.157197	-0.0014335	0.248162	0.854063	0.0610384	-0.00106051	0.135126	1.3669	0.0451789	-0.000424931	0.0580415	0.691898	0.0451576	-0.000189759	0.0668769	0.787288
34.5864	267	267		272	0	0.033994	8.72256e-05	0.0495073	1.04726	0.550281	0.00100375	0.533447	0.326979	0.567924	-0.00144773	0.467065	1.17326	0.153245	-0.00159278	0.164678	1.62061	0.0615392	-6.06167e-05	0.0708152	3.17487	0.206512	-0.00029925	0.283166	1.65256	0.280188	-0.00261065	0.32861	0.306476	0.155781	-0.0013983	0.246861	1.18492	0.0599927	-0.00103109	0.133785	1.71926	0.0447604	-0.000412365	0.0571684	0.883555	0.0449744	-0.000176673	0.0661991	1.60859
51.6245	268	268		273	0	0.0340813	8.74197e-05	0.0495073	1.06497	0.551284	0.00100111	0.533444	0.166254	0.566472	-0.00145464	0.467065	0.595558	0.151666	-0.00156713	0.16308	0.822977	0.0614824	-5.30038e-05	0.0703079	2.15237	0.206236	-0.000252014	0.282503	1.16194	0.277595	-0.00257468	0.326135	0.623315	0.154401	-0.00136323	0.245566	0.887265	0.0589761	-0.00100206	0.132458	0.764552	0.044354	-0.000400534	0.0563083	1.25969	0.0448042	-0.000163917	0.0655281	0
85.795	269	269		274	0.106552	0.0341688	8.75048e-05	0.0495073	0.548575	0.552283	0.000997858	0.533441	0.171278	0.565015	-0.00146055	0.467065	1.02362	0.150111	-0.00154248	0.161498	0.847848	0.0614331	-4.57509e-05	0.0698086	1.1087	0.206008	-0.000204856	0.281846	1.24124	0.275038	-0.00253994	0.323679	1.2843	0.153055	-0.00132828	0.244278	1.17617	0.0579884	-0.000973473	0.131144	0.674172	0.043959	-0.000389474	0.0554612	0.185129	0.0446465	-0.000151538	0.064864	0.421305
55.0555	270	270		275	0.108694	0.0342563	8.74538e-05	0.0495073	0	0.553279	0.000993906	0.533438	0.174721	0.563552	-0.00146578	0.467065	0.939877	0.14858	-0.00151898	0.15993	0.648667	0.0613908	-3.89291e-05	0.0693174	1.13099	0.205826	-0.000157877	0.281195	1.99372	0.272515	-0.00250642	0.321242	1.31012	0.151744	-0.00129358	0.242997	1.06613	0.057029	-0.000945398	0.129843	1.26197	0.0435748	-0.000379208	0.0546269	0.566552	0.0445009	-0.00013958	0.0642065	0
148.459	271	271		276	0	0.0343436	8.72118e-05	0.0495073	0	0.554271	0.000989921	0.533435	0.176899	0.562083	-0.001471	0.467065	0.633691	0.147072	-0.001497	0.158378	0.437836	0.061355	-3.27136e-05	0.0688341	0	0.205692	-0.000110863	0.28055	1.05241	0.270025	-0.00247445	0.318823	1.65806	0.150468	-0.00125956	0.241722	0.0673377	0.0560974	-0.000917999	0.128554	1.74422	0.0432003	-0.00036978	0.053805	0.191205	0.0443672	-0.000128083	0.0635558	0.435131
44.039	272	272		277	0	0.0344306	8.67527e-05	0.0495072	3.49638	0.555259	0.000986408	0.533433	0.545825	0.56061	-0.00147613	0.467065	0.978721	0.145586	-0.00147649	0.156841	0.900635	0.0613251	-2.71577e-05	0.0683584	0	0.205605	-6.38613e-05	0.27991	1.50768	0.267566	-0.00244369	0.316422	0.341066	0.149225	-0.00122625	0.240454	1.1102	0.0551928	-0.000891327	0.127279	0.956054	0.0428349	-0.000361096	0.0529956	0.786622	0.0442446	-0.000117063	0.0629116	0.895072
72.4271	273	273		278	0.113905	0.0345171	8.60578e-05	0.0495072	2.34573	0.556244	0.00098381	0.53343	0.183098	0.559131	-0.00148092	0.467065	0.875623	0.144119	-0.00145735	0.155319	0.453179	0.0613005	-2.22944e-05	0.0678905	0	0.205564	-1.69826e-05	0.279276	1.99389	0.265137	-0.00241367	0.314039	0.343233	0.148015	-0.00119362	0.239193	0.418184	0.0543145	-0.00086541	0.126016	0.962129	0.0424779	-0.00035304	0.0521983	0.197905	0.0441329	-0.000106542	0.0622739	0.450379
35.9896	274	274		279	0	0.0346027	8.51351e-05	0.0495072	1.17747	0.557227	0.000981972	0.533428	0.367633	0.557648	-0.00148533	0.467065	0.988805	0.142671	-0.00143943	0.153812	1.13739	0.0612803	-1.81501e-05	0.06743	0	0.20557	2.96851e-05	0.278647	1.38	0.262738	-0.00238432	0.311675	0.34458	0.146837	-0.00116166	0.237938	1.19161	0.0534617	-0.000840253	0.124766	0.723525	0.0421287	-0.000345597	0.0514131	0.596045	0.0440314	-9.65141e-05	0.0616428	0
53.214	275	275		280	0	0.0346873	8.397e-05	0.0495072	0.59995	0.558208	0.000980381	0.533426	0	0.556161	-0.00148946	0.467065	1.23131	0.14124	-0.00142248	0.15232	0.231812	0.0612639	-1.48002e-05	0.0669769	0	0.205623	7.5742e-05	0.278024	1.84461	0.260368	-0.00235571	0.309328	0.351144	0.145691	-0.00113054	0.23669	0.499841	0.0526337	-0.000815914	0.123528	0.861421	0.0417865	-0.000338773	0.0506396	0.6074	0.0439397	-8.6972e-05	0.061018	0
101.399	276	276		281	0	0.0347705	8.25247e-05	0.0495072	1.80382	0.559188	0.000978988	0.533424	0.563193	0.554669	-0.00149355	0.467065	0.336248	0.139825	-0.00140668	0.150841	1.16162	0.0612505	-1.21954e-05	0.066531	1.21521	0.205722	0.000120833	0.277407	1.01951	0.258027	-0.00232815	0.306998	1.40767	0.144576	-0.00110051	0.235449	0.500943	0.0518296	-0.000792465	0.122302	0.86332	0.0414509	-0.000332638	0.0498778	0	0.0438573	-7.79137e-05	0.0603995	2.30888
191.399	277	277		282	0	0.0348522	8.08304e-05	0.0495072	0	0.560166	0.000977716	0.533422	0.188004	0.553173	-0.00149764	0.467065	1.46144	0.138426	-0.00139218	0.149378	0.697984	0.0612393	-1.03258e-05	0.0660923	0	0.205865	0.000164681	0.276794	1.26496	0.255712	-0.0023017	0.304687	0.352431	0.14349	-0.00107175	0.234214	1.14719	0.0510485	-0.000769905	0.121089	2.10039	0.041121	-0.000327164	0.0491274	0.203208	0.0437837	-6.93528e-05	0.0597873	1.38735
48.7015	278	278		283	0.118407	0.0349321	7.88586e-05	0.0495072	1.21922	0.561143	0.000976231	0.53342	0.951674	0.551674	-0.00150158	0.467065	0.227274	0.13704	-0.00137908	0.147928	1.17773	0.0612296	-9.18359e-06	0.0656606	2.46413	0.206051	0.000207071	0.276188	1.33024	0.253423	-0.00227649	0.302392	0.713599	0.142432	-0.00104443	0.232986	0.289809	0.0502895	-0.000748226	0.119888	2.3774	0.0407963	-0.000322318	0.0483883	0.82291	0.0437184	-6.12959e-05	0.0591814	0.468181
93.3999	279	279		284	0	0.0350098	7.65859e-05	0.0495072	0.614608	0.562119	0.000974155	0.533418	0	0.55017	-0.0015053	0.467065	1.14683	0.135667	-0.00136744	0.146493	0.237476	0.0612207	-8.78027e-06	0.0652359	1.24216	0.206278	0.000247863	0.275586	1.39065	0.251158	-0.00225256	0.300115	0	0.1414	-0.00101864	0.231764	1.02411	0.0495517	-0.000727408	0.118698	0.755322	0.0404762	-0.000318092	0.0476604	0.829654	0.0436609	-5.37727e-05	0.0585815	0.472018
71.8162	280	280		285	0.124625	0.0350852	7.39751e-05	0.0495072	1.92487	0.563091	0.000971041	0.533417	1.00165	0.548663	-0.00150839	0.467065	0.717626	0.134305	-0.00135715	0.145071	0.247914	0.0612118	-8.94748e-06	0.0648179	0	0.206546	0.000287036	0.27499	1.29569	0.248917	-0.00222942	0.297855	0.751071	0.140394	-0.000994492	0.230548	0.610817	0.0488343	-0.000707478	0.11752	1.05268	0.04016	-0.000314379	0.0469434	0	0.0436107	-4.68294e-05	0.0579878	1.4783
166.064	281	281		286	0	0.0351577	7.10043e-05	0.0495072	0	0.56406	0.000966509	0.533415	0.612818	0.547154	-0.00151015	0.467065	0.487834	0.132953	-0.001348	0.143663	0.505588	0.0612026	-9.4743e-06	0.0644067	2.64457	0.206852	0.000325232	0.274399	0.686158	0.246699	-0.00220677	0.295612	0	0.139411	-0.000971921	0.229339	0.0777578	0.0481365	-0.000688453	0.116355	0.134007	0.0398473	-0.000311179	0.0462372	0	0.043567	-4.04968e-05	0.0574	0.502465
147.371	282	282		287	0.128225	0.035227	6.76597e-05	0.0495072	1.32031	0.565024	0.000959963	0.533413	0.824463	0.545644	-0.0015101	0.467065	0.738354	0.131609	-0.00133989	0.142269	0.51015	0.0611928	-1.03551e-05	0.064002	0	0.207196	0.00036279	0.273813	1.22623	0.244504	-0.00218445	0.293386	0.386382	0.13845	-0.000950875	0.228136	1.2577	0.0474571	-0.000670394	0.1152	0.676082	0.0395375	-0.000308498	0.0455416	0.445569	0.0435295	-3.47959e-05	0.0568182	0
137.644	283	283		288	0	0.0352929	6.39255e-05	0.0495072	0.667649	0.565979	0.000951285	0.533412	1.25073	0.544134	-0.00150832	0.467065	0.497823	0.130272	-0.00133284	0.140889	0.773911	0.0611818	-1.16174e-05	0.0636038	0	0.207577	0.000399619	0.273233	0.97018	0.24233	-0.00216248	0.291177	1.1723	0.137509	-0.000931386	0.226939	0.1587	0.0467954	-0.000653299	0.114057	0.547005	0.0392301	-0.000306353	0.0448565	0.225313	0.0434972	-2.97461e-05	0.0562423	0.512754
0	284	284		289	1.69381	0.0353548	5.97772e-05	0.0495072	0	0.566925	0.000940349	0.533411	1.88416	0.542628	-0.00150495	0.467065	0.624259	0.128943	-0.00132694	0.139521	0.517582	0.0611694	-1.32887e-05	0.063212	0	0.207995	0.000435574	0.272657	1.2441	0.240179	-0.0021409	0.288985	0.784023	0.136586	-0.000913504	0.225749	0.637616	0.0461502	-0.000637163	0.112926	0.961676	0.0389246	-0.000304772	0.0441816	0.904121	0.0434697	-2.5378e-05	0.0556723	1.02877
138.198	285	285		290	0	0.0354123	5.51882e-05	0.0495072	0.671836	0.567859	0.00092712	0.533409	0.419525	0.541125	-0.00150003	0.467065	1.63058	0.127618	-0.00132227	0.138167	0.259588	0.0611551	-1.52824e-05	0.0628265	0	0.208448	0.0004705	0.272087	1.68357	0.238048	-0.00211987	0.286808	0.786438	0.135681	-0.000897329	0.224565	1.27996	0.0455207	-0.000622021	0.111805	0.412826	0.0386203	-0.000303785	0.043517	0	0.0434462	-2.1724e-05	0.055108	0.515969
156.148	286	286		291	0	0.035465	5.01527e-05	0.0495072	1.35551	0.568779	0.000911583	0.533408	0.423222	0.539628	-0.00149358	0.467065	0.379019	0.126298	-0.00131886	0.136827	0.261875	0.0611387	-1.75786e-05	0.0624472	0	0.208936	0.000504357	0.271521	1.25893	0.235939	-0.00209941	0.284649	0.793367	0.134791	-0.000882887	0.223387	0.645215	0.0449058	-0.000607879	0.110696	0.832928	0.0383168	-0.000303397	0.0428623	1.60336	0.043426	-1.87899e-05	0.0545495	1.04103
60.1206	287	287		292	0	0.0355124	4.46857e-05	0.0495072	0	0.569682	0.000893458	0.533407	0.423581	0.538138	-0.00148564	0.467065	1.01284	0.12498	-0.0013165	0.135499	0.786293	0.0611198	-2.02322e-05	0.0620739	1.37095	0.209456	0.000536958	0.270961	0.930515	0.233849	-0.00207921	0.282505	0.79404	0.133915	-0.000870252	0.222215	0.807001	0.0443047	-0.000594559	0.109598	1.67005	0.0380134	-0.000303477	0.0422175	0.686755	0.0434085	-1.64576e-05	0.0539966	0.520957
150.248	288	288		293	0.264377	0.0355542	3.87491e-05	0.0495072	0.680562	0.570565	0.00087296	0.533406	0	0.536657	-0.00147651	0.467065	0.634314	0.123664	-0.00131508	0.134184	0.525919	0.0610981	-2.33576e-05	0.0617066	0	0.210009	0.000567913	0.270405	1.70544	0.23178	-0.00205895	0.280378	0	0.13305	-0.00085944	0.22105	0.890541	0.0437165	-0.000581968	0.10851	0.139396	0.0377097	-0.000303852	0.0415824	0.689014	0.0433929	-1.47132e-05	0.0534493	1.04534
43.4998	289	289		294	0.135304	0.0355898	3.2323e-05	0.0495072	1.39321	0.571427	0.000850164	0.533405	0.217496	0.535186	-0.00146611	0.467065	1.29983	0.12235	-0.00131455	0.132882	0.269158	0.061073	-2.69452e-05	0.0613452	2.81576	0.210592	0.000597102	0.269854	1.52006	0.229731	-0.00203859	0.278267	0	0.132195	-0.00085036	0.219891	0.99515	0.0431405	-0.000570108	0.107434	2.28719	0.0374056	-0.00030452	0.0409568	1.17542	0.0433788	-1.35611e-05	0.0529076	0
150.687	290	290		295	0.135564	0.0356187	2.53854e-05	0.0495072	1.39588	0.572265	0.000825079	0.533404	0.653739	0.533725	-0.0014542	0.467065	0.780614	0.121035	-0.00131483	0.131592	0	0.0610441	-3.09375e-05	0.0609896	0	0.211202	0.000624358	0.269309	0.731976	0.227703	-0.00201811	0.276171	0.816995	0.131349	-0.000842841	0.218737	0.414751	0.042576	-0.000558985	0.106368	0.428867	0.0371006	-0.000305512	0.0403406	0.471072	0.0433656	-1.29988e-05	0.0523713	0.536017
72.0881	291	291		296	0	0.0356404	1.79374e-05	0.0495072	1.40306	0.573076	0.000797587	0.533403	0.438068	0.532278	-0.00144106	0.467065	0.78463	0.11972	-0.00131581	0.130315	0.542124	0.061011	-3.5167e-05	0.0606397	0	0.21184	0.000649329	0.268768	1.24658	0.225695	-0.00199758	0.274092	0.410599	0.130509	-0.000836701	0.21759	1.00219	0.0420223	-0.000548655	0.105312	1.29466	0.0367944	-0.000306865	0.0397338	0.236748	0.0433526	-1.30881e-05	0.0518405	0.538775
59.894	292	292		297	0	0.0356544	9.9837e-06	0.0495072	0	0.573859	0.000767462	0.533402	0.66085	0.530843	-0.00142752	0.467065	1.18497	0.118403	-0.00131734	0.129051	0.545216	0.0609736	-3.96954e-05	0.0602954	0	0.2125	0.000671541	0.268231	0.854168	0.223708	-0.00197693	0.272028	0	0.129675	-0.000832123	0.216449	0.671658	0.0414785	-0.000539057	0.104268	2.60697	0.0364868	-0.000308367	0.039136	1.19049	0.0433392	-1.38445e-05	0.0513151	0.541848
58.8681	293	293		298	0	0.0356602	1.59757e-06	0.0495072	0	0.57461	0.000734551	0.533401	2.3106	0.529423	-0.00141414	0.467065	1.65652	0.117085	-0.00131917	0.127798	1.42829	0.0609315	-4.46224e-05	0.0599566	0	0.213182	0.000690917	0.2677	1.37326	0.221741	-0.00195619	0.269979	0.43271	0.128844	-0.000829179	0.215313	0.527201	0.0409439	-0.000530142	0.103233	1.66723	0.0361777	-0.000309778	0.0385472	0.498994	0.0433247	-1.5305e-05	0.0507949	0.567789
46.7277	294	294		299	0	0.0356574	-7.1714e-06	0.0495072	0	0.575327	0.000698979	0.5334	0.467011	0.528015	-0.00140121	0.467065	0.418235	0.115765	-0.00132109	0.126558	0.866911	0.0608842	-5.00212e-05	0.0596233	1.51151	0.213881	0.000707421	0.267173	1.32894	0.219796	-0.0019354	0.267946	0.437727	0.128016	-0.000827914	0.214184	0.889744	0.0404179	-0.000521916	0.102209	0.459554	0.0358673	-0.00031104	0.0379673	0.757168	0.0433084	-1.74458e-05	0.0502801	1.72311
38.1419	295	295		300	0.152557	0.0356457	-1.6326e-05	0.0495072	0.785428	0.576007	0.000660806	0.5334	1.47137	0.52662	-0.00138874	0.467065	0.878465	0.114443	-0.0013231	0.12533	0.303479	0.0608313	-5.58981e-05	0.0592953	0	0.214596	0.00072103	0.26665	0.82373	0.217871	-0.00191456	0.265929	0.919407	0.127188	-0.000828338	0.213061	0.65437	0.0398998	-0.000514385	0.101195	0.965252	0.0355557	-0.000312158	0.0373961	1.3253	0.0432896	-2.02586e-05	0.0497705	0.603208
51.8298	296	296		301	0	0.0356248	-2.55809e-05	0.0495072	1.57902	0.576648	0.000620732	0.533399	0	0.525237	-0.00137672	0.467065	1.32602	0.113119	-0.00132473	0.124114	0.915168	0.0607723	-6.21079e-05	0.0589725	0	0.215322	0.000731511	0.266133	1.91486	0.215967	-0.00189346	0.263926	0.462093	0.126359	-0.000829809	0.211943	1.41031	0.039389	-0.000507308	0.100191	1.29531	0.0352431	-0.000313027	0.0368336	0.532877	0.0432678	-2.32821e-05	0.049266	0
54.6581	297	297		302	0.307692	0.0355946	-3.47012e-05	0.0495072	2.37619	0.577248	0.000579355	0.533398	0.247301	0.523866	-0.00136514	0.467065	0.73824	0.111794	-0.00132563	0.12291	0.306043	0.060707	-6.85322e-05	0.0586549	0	0.216057	0.000738688	0.26562	1.27921	0.214084	-0.00187188	0.261939	0	0.125528	-0.000831776	0.210832	0.564821	0.0388851	-0.000500489	0.0991967	0.973408	0.0349298	-0.000313568	0.0362794	0.534601	0.0432431	-2.61565e-05	0.0487667	1.82491
46.0743	298	298		303	0.313529	0.0355555	-4.34861e-05	0.0495072	1.61418	0.577807	0.000537185	0.533397	0	0.522507	-0.00135394	0.467065	1.05464	0.110468	-0.00132579	0.121717	1.87109	0.0606352	-7.5141e-05	0.0583424	0	0.216799	0.000743112	0.265111	1.10714	0.212223	-0.00184973	0.259966	0	0.124695	-0.000833674	0.209726	1.44171	0.038388	-0.000493891	0.0982125	1.65477	0.0346161	-0.000313758	0.0357336	0.817112	0.0432155	-2.89249e-05	0.0482724	2.47937
55.9634	299	299		304	0	0.0355078	-5.19153e-05	0.0495072	0	0.578322	0.000494046	0.533397	1.02929	0.521159	-0.00134297	0.467065	0.768157	0.109142	-0.00132525	0.120536	0.318445	0.0605567	-8.1756e-05	0.0580349	3.33137	0.217543	0.000745532	0.264607	1.53088	0.210385	-0.00182715	0.258009	0.964749	0.123861	-0.000835171	0.208626	0.686641	0.0378973	-0.000487494	0.0972381	1.52097	0.0343024	-0.000313619	0.0351961	0.834398	0.0431852	-3.16559e-05	0.0477831	0.632956
118.421	300	300		305	0	0.0354518	-6.00187e-05	0.0495072	0.913443	0.578794	0.000449635	0.533396	0.285198	0.519821	-0.00133197	0.467065	0.170274	0.107818	-0.00132403	0.119366	0.352942	0.0604718	-8.81252e-05	0.0577324	0	0.218289	0.000746248	0.264107	1.17946	0.208569	-0.0018044	0.256066	1.06926	0.123025	-0.000836402	0.207531	0.542813	0.0374129	-0.000481309	0.0962734	0.187096	0.033989	-0.000313114	0.0346666	0	0.0431522	-3.44346e-05	0.0472988	0.701523
81.1274	301	301		306	0	0.0353878	-6.77588e-05	0.0495072	0	0.579221	0.000403909	0.533396	0.594283	0.518495	-0.00132111	0.467065	1.06443	0.106494	-0.00132217	0.118208	0.735445	0.0603806	-9.42366e-05	0.0574347	3.84688	0.219035	0.000746016	0.263612	1.15219	0.206776	-0.00178158	0.254138	1.67105	0.122188	-0.000837447	0.206443	0.452436	0.0369346	-0.000475358	0.0953182	0.584794	0.0336762	-0.000312257	0.0341451	0	0.0431163	-3.73033e-05	0.0468194	0
54.5785	302	302		307	0.371976	0.0353164	-7.51312e-05	0.0495072	0	0.579602	0.000356688	0.533395	0.896902	0.517179	-0.00131096	0.467065	1.42974	0.105173	-0.00131975	0.117061	1.47993	0.0602834	-0.000100126	0.0571417	0	0.219781	0.000745339	0.263121	1.2364	0.205006	-0.0017588	0.252224	1.12088	0.12135	-0.000838296	0.20536	0.455216	0.0364621	-0.000469658	0.0943725	0.392258	0.0333645	-0.000311066	0.0336314	0.969436	0.0430775	-4.03022e-05	0.0463449	0.735393
123.777	303	303		308	0	0.0352377	-8.21671e-05	0.0495072	0.960611	0.579934	0.000307577	0.533395	0.299925	0.515872	-0.00130191	0.467065	1.97152	0.103855	-0.0013168	0.115925	1.85583	0.0601804	-0.000105707	0.0568535	0	0.220526	0.000744043	0.262634	1.93986	0.203258	-0.00173609	0.250325	0.562236	0.120512	-0.000838774	0.204283	0.228337	0.0359952	-0.000464147	0.0934362	0.196757	0.0330542	-0.000309494	0.0331254	0	0.0430357	-4.34089e-05	0.0458752	0.737748
126.295	304	304		309	0.188332	0.0351521	-8.88917e-05	0.0495072	0	0.580216	0.000256778	0.533394	0	0.514575	-0.00129358	0.467065	0.903725	0.10254	-0.00131338	0.1148	0.374646	0.0600721	-0.000110911	0.0565699	1.95965	0.221269	0.000742377	0.262151	1.33009	0.201533	-0.00171356	0.24844	0.567506	0.119673	-0.000838956	0.203212	0.230477	0.0355337	-0.000458847	0.0925092	0.595804	0.0327457	-0.00030756	0.0326271	0.327219	0.0429907	-4.66516e-05	0.0454102	0.744663
160.256	305	305		310	0	0.03506	-9.53083e-05	0.0495072	0	0.580447	0.000204431	0.533394	0	0.513285	-0.00128577	0.467065	0.365806	0.101228	-0.00130947	0.113686	0.758237	0.0599587	-0.00011569	0.0562908	1.98305	0.22201	0.000740413	0.261673	0.870179	0.199831	-0.00169116	0.246569	0.574281	0.118834	-0.000838839	0.202146	0.349844	0.0350775	-0.00045372	0.0915913	0	0.0324392	-0.000305282	0.0321362	0	0.0429423	-5.00307e-05	0.0449499	0.753554
72.5286	306	306		311	0	0.0349616	-0.000101448	0.0495072	0	0.580625	0.000151966	0.533393	0	0.512003	-0.00127771	0.467065	0.94488	0.0999212	-0.00130492	0.112582	1.17512	0.0598408	-0.000120051	0.0560162	2.04889	0.22275	0.00073812	0.261199	1.39066	0.198151	-0.00166868	0.244712	0	0.117995	-0.000838201	0.201085	1.44825	0.0346263	-0.000448522	0.0906826	1.24587	0.0321352	-0.000302743	0.0316528	0	0.0428906	-5.34645e-05	0.0444943	0.778575
171.274	307	307		312	0	0.0348572	-0.000107348	0.0495072	0	0.580751	0.000100202	0.533393	0.324304	0.51073	-0.0012686	0.467065	0.387244	0.0986188	-0.00129978	0.11149	0	0.0597188	-0.000124053	0.055746	0	0.223486	0.000735456	0.260729	1.25752	0.196494	-0.00164613	0.242869	0.607937	0.117158	-0.000837002	0.200031	0.246897	0.0341805	-0.0004432	0.0897829	0.21275	0.0318338	-0.000299982	0.0311766	0.350531	0.0428354	-5.69454e-05	0.0440434	0.797715
115.164	308	308		313	1.26894	0.034747	-0.000113015	0.0495072	0	0.580826	4.90219e-05	0.533393	1.35984	0.509466	-0.00125852	0.467065	0.811876	0.0973218	-0.0012941	0.110408	2.10356	0.0595928	-0.000127708	0.0554801	0	0.22422	0.000732374	0.260264	0.0877063	0.194859	-0.00162356	0.241041	1.27457	0.116321	-0.000835268	0.198982	0.258816	0.03374	-0.000437759	0.0888921	0.223021	0.0315353	-0.000297006	0.0307076	1.46981	0.0427767	-6.04818e-05	0.043597	0
51.13	309	309		314	0	0.0346312	-0.000118474	0.0495072	1.10173	0.580849	-1.99778e-06	0.533392	0	0.508213	-0.00124785	0.467065	1.02687	0.0960308	-0.00128792	0.109337	1.27708	0.0594634	-0.00013106	0.0552185	0	0.224951	0.000728712	0.259802	0.799594	0.193246	-0.00160111	0.239226	0.644834	0.115487	-0.000833082	0.197938	0.392823	0.033305	-0.000432225	0.0880102	1.35398	0.0312399	-0.000293837	0.0302456	0.371806	0.0427144	-6.41053e-05	0.0431551	0
58.5622	310	310		315	0.442074	0.0345101	-0.000123738	0.0495072	0	0.580822	-5.30651e-05	0.533392	1.06592	0.506971	-0.00123678	0.467065	0.636396	0.0947461	-0.00128129	0.108276	0	0.0593308	-0.000134131	0.0549611	2.29995	0.225678	0.000724388	0.259345	1.65365	0.191657	-0.00157883	0.237424	3.33028	0.114655	-0.000830486	0.1969	0.13525	0.0328756	-0.000426609	0.087137	0.699268	0.0309477	-0.000290487	0.0297906	0	0.0426485	-6.7831e-05	0.0427177	0.873977
137.32	311	311		316	0	0.0343838	-0.000128842	0.0495072	1.3356	0.580743	-0.000104581	0.533392	0.834007	0.505739	-0.00122549	0.467065	1.4938	0.0934683	-0.00127431	0.107225	0	0.0591953	-0.000136979	0.0547078	0	0.226399	0.000719175	0.258891	0.96932	0.190089	-0.00155669	0.235636	0.78171	0.113826	-0.000827536	0.195867	0.634942	0.0324518	-0.000420946	0.0862725	0	0.030659	-0.000286951	0.0293424	0	0.0425787	-7.16458e-05	0.0422847	0
104.363	312	312		317	0	0.0342525	-0.00013381	0.0495072	0	0.580612	-0.00015657	0.533391	0	0.50452	-0.00121367	0.467065	1.00981	0.0921976	-0.00126704	0.106184	1.04656	0.0590569	-0.000139647	0.0544585	0	0.227116	0.000712919	0.258441	1.74869	0.188543	-0.00153452	0.233862	0.792651	0.113	-0.00082419	0.19484	0.804785	0.0320337	-0.000415257	0.0854165	0	0.0303739	-0.00028318	0.028901	0	0.0425052	-7.54692e-05	0.0418561	1.04009
136.787	313	313		318	0	0.0341162	-0.000138645	0.0495072	0	0.58043	-0.000208964	0.533391	0	0.503312	-0.00120134	0.467065	1.04568	0.0909343	-0.00125949	0.105154	0	0.058916	-0.000142141	0.0542133	0	0.227825	0.000705669	0.257996	2.26494	0.18702	-0.00151232	0.232101	0	0.112178	-0.000820456	0.193818	0.833379	0.0316213	-0.000409546	0.0845691	0	0.0300927	-0.000279177	0.0284662	0	0.0424278	-7.93019e-05	0.0414319	0
87.8614	314	314		319	0	0.0339752	-0.000143395	0.0495072	0	0.580195	-0.000260819	0.533391	0	0.502117	-0.00118882	0.467065	1.85182	0.0896787	-0.00125174	0.104133	1.09513	0.0587727	-0.000144542	0.053972	2.86414	0.228527	0.000697689	0.257554	2.17345	0.185519	-0.00149005	0.230353	0.829442	0.11136	-0.000816302	0.192801	2.0245	0.0312146	-0.000403859	0.08373	0.580534	0.0298156	-0.000274983	0.028038	0.478249	0.0423466	-8.30935e-05	0.0410119	0
126.543	315	315		320	0.201046	0.0338295	-0.000148076	0.0495072	0.282687	0.579908	-0.000311763	0.53339	0.776164	0.500935	-0.00117628	0.467065	0.349662	0.0884309	-0.00124379	0.103123	0.311069	0.058627	-0.000146883	0.0537345	0.712937	0.22922	0.000688987	0.257116	0.258879	0.18404	-0.00146767	0.228618	0.981301	0.110546	-0.00081168	0.19179	0.286427	0.0308135	-0.000398209	0.0828993	0.107933	0.0295428	-0.000270614	0.0276162	0.309151	0.0422616	-8.68038e-05	0.0405963	1.126
0	316	316		321	1.65944	0.0336791	-0.000152647	0.0495072	1.71558	0.579571	-0.000361588	0.53339	1.90748	0.499765	-0.00116369	0.467065	1.41911	0.0871912	-0.00123544	0.102122	1.95333	0.0584789	-0.000149203	0.0535009	1.68127	0.229904	0.000679711	0.256682	1.85598	0.182583	-0.00144511	0.226897	0.804395	0.109737	-0.000806589	0.190784	2.38406	0.0304181	-0.00039259	0.0820768	2.23123	0.0292744	-0.00026609	0.0272007	0.938847	0.042173	-9.03897e-05	0.0401848	0.699118
0	317	317		322	0.98542	0.0335242	-0.000157083	0.0495072	1.05354	0.579186	-0.000410046	0.53339	1.30164	0.498607	-0.00115099	0.467065	0.951033	0.0859602	-0.00122665	0.101131	0.904752	0.0583285	-0.000151534	0.053271	2.39159	0.230579	0.000669867	0.256252	0.50692	0.18115	-0.00142239	0.225188	1.09606	0.108933	-0.000801054	0.189783	1.01235	0.0300283	-0.000387007	0.0812625	0.644165	0.0290106	-0.000261427	0.0267915	0.817943	0.0420809	-9.38435e-05	0.0397775	1.64503
0	318	318		323	1.49541	0.033365	-0.000161378	0.0495072	2.62653	0.578752	-0.000456833	0.53339	1.2072	0.497463	-0.00113808	0.467065	1.27249	0.0847381	-0.00121746	0.10015	1.81009	0.0581758	-0.000153931	0.0530448	0.574511	0.231244	0.000659396	0.255826	0.927371	0.179739	-0.00139964	0.223493	0.814694	0.108135	-0.000795179	0.188788	2.74637	0.0296441	-0.000381488	0.0804562	1.44076	0.0287516	-0.000256653	0.0263885	1.26124	0.0419854	-9.71823e-05	0.0393743	0.941871
0	319	319		324	0.711186	0.0332015	-0.000165554	0.0495072	0.578914	0.578272	-0.000502322	0.53339	1.70538	0.496331	-0.00112519	0.467065	1.13877	0.0835254	-0.00120789	0.099178	0.382223	0.0580206	-0.000156438	0.0528222	0.876015	0.231898	0.000648592	0.255403	0.637618	0.17835	-0.00137692	0.22181	1.65934	0.107342	-0.000789046	0.187798	0.541974	0.0292653	-0.000376056	0.079658	0.886352	0.0284974	-0.00025179	0.0259915	1.42148	0.0418866	-0.000100371	0.0389753	1.38356
70.7716	320	320		325	0.0320718	0.0330339	-0.000169614	0.0495072	0.481618	0.577748	-0.000545693	0.533389	0.42444	0.495213	-0.00111172	0.467065	0.798939	0.0823224	-0.00119792	0.0982155	0.875252	0.0578629	-0.000158954	0.0526031	0	0.232541	0.00063786	0.254984	1.3664	0.176985	-0.00135408	0.220139	1.17567	0.106557	-0.000782596	0.186813	0.959679	0.028892	-0.000370731	0.0788677	2.26595	0.028248	-0.000246856	0.0256005	0.431268	0.0417847	-0.000103359	0.0385802	0.442025
129.311	321	321		326	0	0.0328623	-0.000173558	0.0495072	0.609519	0.577182	-0.000586763	0.533389	0.932503	0.494108	-0.00109768	0.467065	1.06894	0.0811296	-0.00118763	0.0972624	0.321944	0.0577027	-0.000161431	0.0523876	0	0.233174	0.000627261	0.254569	1.28118	0.175642	-0.00133113	0.218482	0.158392	0.105777	-0.000775848	0.185833	1.14381	0.0285238	-0.000365545	0.0780852	0.465907	0.0280037	-0.000241883	0.0252153	0.254645	0.0416799	-0.000106146	0.0381892	0.335647
58.2505	322	322		327	0.133458	0.0326869	-0.00017728	0.0495072	1.25383	0.576575	-0.000626246	0.533389	0.147183	0.493017	-0.0010837	0.467065	0.731354	0.0799473	-0.00117701	0.0963186	1.32569	0.0575402	-0.000163496	0.0521756	0.947705	0.233796	0.000617079	0.254157	0.95034	0.174322	-0.00130812	0.216837	0.406875	0.105005	-0.000768491	0.184858	2.42193	0.0281608	-0.000360466	0.0773104	1.10284	0.0277643	-0.000236837	0.024836	0.186627	0.0415725	-0.000108706	0.0378021	0.920836
0	323	323		328	0.798879	0.0325078	-0.000180767	0.0495072	1.17184	0.57593	-0.000664342	0.533389	0.918477	0.49194	-0.00106998	0.467065	0.82858	0.0787757	-0.00116605	0.0953839	0.515224	0.0573759	-0.000165006	0.0519669	0.328011	0.234408	0.000607554	0.253749	0.824237	0.173026	-0.00128505	0.215204	1.26995	0.104241	-0.000760443	0.183889	1.46598	0.0278029	-0.00035547	0.0765434	0.497077	0.02753	-0.000231711	0.0244623	0.893718	0.0414626	-0.000111029	0.037419	0.956133
163.411	324	324		329	0	0.0323254	-0.000184041	0.0495072	0.687993	0.575247	-0.000701164	0.533389	0.485051	0.490877	-0.00105686	0.467065	1.16978	0.0776153	-0.00115482	0.0944583	0.727695	0.0572104	-0.0001659	0.0517616	0.347024	0.235011	0.000598914	0.253345	1.04397	0.171752	-0.001262	0.213583	0.268176	0.103484	-0.000751779	0.182924	0.418258	0.0274499	-0.000350526	0.075784	0.210146	0.0273009	-0.000226524	0.0240943	0.164011	0.0413505	-0.000113146	0.0370397	0.126287
204.014	325	325		330	0	0.0321398	-0.000187103	0.0495072	0.137641	0.574528	-0.000736736	0.533388	1.13375	0.489827	-0.00104438	0.467065	0.109291	0.0764662	-0.00114332	0.0935417	0	0.0570443	-0.000166174	0.0515596	0	0.235606	0.000591175	0.252944	0.662933	0.170502	-0.00123898	0.211975	0.447096	0.102737	-0.000742506	0.181965	0.0642681	0.0271018	-0.000345632	0.0750321	0.105105	0.027077	-0.000221281	0.0237319	0.0820305	0.0412364	-0.00011506	0.0366643	1.13819
0	326	326		331	0.774138	0.0319513	-0.000189898	0.0495072	1.52011	0.573774	-0.000771479	0.533388	1.21918	0.488788	-0.0010329	0.467065	0.769228	0.0753287	-0.00113165	0.0926339	0.455784	0.0568783	-0.000165901	0.0513608	0	0.236194	0.000584842	0.252547	0.455366	0.169274	-0.0012161	0.210379	0.897853	0.102	-0.000732689	0.18101	1.03534	0.0267586	-0.000340823	0.0742877	0.950979	0.0268583	-0.000216013	0.0233748	1.48729	0.0411204	-0.000116824	0.0362927	1.64984
45.7595	327	327		332	0.0385569	0.0317601	-0.00019241	0.0495072	0.868507	0.572985	-0.000805584	0.533388	0.681202	0.48776	-0.00102264	0.467065	1.38499	0.0742029	-0.00111985	0.091735	1.43643	0.0567127	-0.000165121	0.0511652	0	0.236777	0.000580319	0.252153	1.582	0.16807	-0.00119339	0.208795	1.13034	0.101272	-0.000722355	0.180061	1.90531	0.0264201	-0.000336117	0.0735506	2.05374	0.026645	-0.000210742	0.0230232	0.345504	0.0410027	-0.000118466	0.0359248	1.06414
304.38	328	328		333	0.0789443	0.0315666	-0.000194638	0.0495072	0.592749	0.572163	-0.000839051	0.533388	0.61031	0.486742	-0.0010136	0.467065	0.471445	0.073089	-0.00110794	0.0908448	0.195679	0.0565482	-0.000163835	0.0509727	0	0.237355	0.000577607	0.251763	0.55007	0.166888	-0.00117087	0.207222	0.288813	0.100555	-0.000711503	0.179116	0.277117	0.0260863	-0.000331516	0.0728209	0	0.0264369	-0.000205466	0.0226768	0.0883161	0.0408835	-0.000119987	0.0355607	0.680025
50.7676	329	329		334	0.118938	0.0313709	-0.000196597	0.0495072	1.19221	0.571307	-0.000871668	0.533388	0.962784	0.485733	-0.00100576	0.467065	1.02741	0.0719871	-0.0010959	0.0899632	1.08196	0.0563852	-0.000162066	0.0507833	0	0.237932	0.000576603	0.251376	1.19126	0.165728	-0.00114855	0.205662	0.58017	0.0998491	-0.000700176	0.178177	1.36146	0.0257571	-0.00032703	0.0720984	1.42469	0.026234	-0.000200198	0.0223357	0.399617	0.0407628	-0.000121375	0.0352003	0.68302
0	330	330		335	0.791671	0.0311735	-0.000198302	0.0495072	1.71864	0.57042	-0.000903071	0.533388	1.00973	0.48473	-0.000999345	0.467065	1.24401	0.0708972	-0.00108374	0.0890902	1.54903	0.0562242	-0.000159878	0.050597	1.57472	0.238509	0.000577038	0.250992	0.816429	0.16459	-0.00112647	0.204113	0.812298	0.0991548	-0.000688444	0.177242	2.12865	0.0254322	-0.000322689	0.0713831	1.31477	0.0260365	-0.000194928	0.0219997	1.49408	0.0406408	-0.000122639	0.0348435	0.573063
0	331	331		336	1.46167	0.0309744	-0.000199752	0.0495072	0.312229	0.569501	-0.000933189	0.533388	1.28592	0.483733	-0.000994577	0.467065	0.952838	0.0698196	-0.00107148	0.0882257	2.16969	0.0560656	-0.000157297	0.0504136	1.96861	0.239087	0.000578809	0.250612	0.989359	0.163475	-0.00110467	0.202576	0.913804	0.0984724	-0.000676317	0.176313	0.804023	0.0251116	-0.000318503	0.0706749	1.01509	0.0258442	-0.000189641	0.0216687	1.21325	0.0405176	-0.000123797	0.0344903	0.429842
161.589	332	332		337	0.0416512	0.030774	-0.000200948	0.0495072	0.156368	0.568554	-0.000962022	0.533388	1.47266	0.482741	-0.000991454	0.467065	1.12117	0.0687543	-0.00105911	0.0873695	0.309722	0.0559097	-0.000154322	0.0502332	0	0.239667	0.000581915	0.250235	0.753133	0.162381	-0.00108314	0.201051	1.22106	0.0978023	-0.000663793	0.175388	0.695079	0.0247951	-0.000314473	0.0699737	0.179109	0.0256572	-0.000184335	0.0213427	0.139788	0.0403932	-0.000124849	0.0341408	0.43054
60.5579	333	333		338	0	0.0305726	-0.00020189	0.0495072	0.939309	0.567578	-0.000989571	0.533387	0.459885	0.48175	-0.000989975	0.467065	1.33091	0.0677014	-0.00104664	0.0865217	1.86465	0.0557571	-0.000150953	0.0500556	0.394824	0.240251	0.000586357	0.249862	1.25298	0.161308	-0.00106188	0.199537	0.712951	0.0971449	-0.000650873	0.174468	2.06064	0.0244826	-0.000310599	0.0692794	1.0783	0.0254755	-0.00017901	0.0210216	0.560739	0.0402679	-0.000125795	0.0337947	1.00721
0	334	334		339	1.51498	0.0303703	-0.000202577	0.0495072	0.471998	0.566575	-0.00101584	0.533387	1.01772	0.48076	-0.000990141	0.467065	1.12809	0.0666611	-0.00103408	0.0856821	0.519387	0.055608	-0.00014719	0.049881	0.793587	0.24084	0.000592134	0.249491	1.63176	0.160257	-0.0010409	0.198034	0.306637	0.0965007	-0.000637558	0.173553	1.25401	0.0241739	-0.000306881	0.0685921	2.23225	0.0252992	-0.000173668	0.0207054	1.22272	0.0401417	-0.000126634	0.0334522	0.866391
0	335	335		340	1.2676	0.0301675	-0.000202954	0.0495072	1.58207	0.565547	-0.00104074	0.533387	1.39564	0.479769	-0.000991972	0.467065	1.13323	0.0656333	-0.00102137	0.0848506	2.30198	0.0554628	-0.000143063	0.0497091	1.1958	0.241436	0.000599116	0.249124	1.00162	0.159227	-0.00102017	0.196543	1.23419	0.09587	-0.000623815	0.172643	1.25973	0.0238688	-0.000303266	0.0679115	1.14897	0.0251282	-0.000168321	0.0203939	1.22829	0.0400147	-0.000127389	0.0331131	1.59707
0	336	336		341	1.02607	0.0299646	-0.000202975	0.0495072	1.76201	0.564494	-0.00106421	0.533387	1.22421	0.478776	-0.000995487	0.467065	1.14749	0.0646184	-0.00100851	0.0840272	1.37574	0.0553219	-0.000138598	0.0495399	0.403616	0.242039	0.000607192	0.248761	1.68196	0.158217	-0.000999683	0.195063	1.04074	0.0952532	-0.000609619	0.171737	1.04953	0.0235673	-0.000299711	0.0672377	1.90095	0.0249625	-0.000162981	0.0200871	0.76446	0.0398869	-0.000128077	0.0327775	1.47028
157.681	337	337		342	0.0431335	0.0297617	-0.000202639	0.0495072	0.323866	0.563419	-0.00108625	0.533387	1.52507	0.477778	-0.00100069	0.467065	0.257159	0.0636164	-0.000995477	0.0832118	0.213829	0.0551857	-0.000133795	0.0493735	0.81679	0.242651	0.000616364	0.2484	0.891766	0.157227	-0.000979447	0.193594	0.737458	0.0946509	-0.00059497	0.170836	0.795804	0.0232694	-0.000296216	0.0665706	0.309138	0.0248022	-0.000157648	0.0197849	0.0965082	0.0397585	-0.0001287	0.0324453	0
224.858	338	338		343	0	0.0295594	-0.000201949	0.0495072	1.47344	0.562322	-0.00110685	0.533387	1.54015	0.476774	-0.00100758	0.467065	0.346701	0.0626275	-0.000982285	0.0824043	0	0.0550545	-0.000128656	0.0492097	0.824864	0.243272	0.000626618	0.248043	0.494322	0.156258	-0.000959453	0.192136	0.318722	0.0940634	-0.000579873	0.16994	0.229075	0.0229749	-0.000292777	0.0659102	0.124877	0.0246472	-0.000152324	0.0194872	0.146193	0.0396296	-0.000129253	0.0321164	0.300179
0	339	339		344	1.01352	0.0293579	-0.000200924	0.0495072	1.32168	0.561205	-0.00112598	0.533387	1.26219	0.475762	-0.00101638	0.467065	1.31498	0.0616519	-0.000968936	0.0816046	1.09051	0.0549285	-0.00012322	0.0490486	1.24842	0.243904	0.000637783	0.247688	1.32062	0.155308	-0.000939651	0.19069	1.28849	0.0934912	-0.000564393	0.169049	0.656036	0.0226838	-0.000289336	0.0652562	0.378	0.0244976	-0.000147025	0.0191941	1.08467	0.0395001	-0.000129681	0.0317909	0.757194
0	340	340		345	0.712849	0.0291577	-0.000199573	0.0495072	0.333899	0.560071	-0.00114362	0.533387	1.07992	0.47474	-0.00102714	0.467065	0.930149	0.0606897	-0.000955432	0.0808127	0.551134	0.0548081	-0.000117502	0.0488901	1.68419	0.244548	0.000649796	0.247337	0.504648	0.154378	-0.000920026	0.189254	0.433839	0.0929347	-0.000548556	0.168162	1.25193	0.0223962	-0.000285872	0.0646088	0.70181	0.0243532	-0.000141758	0.0189053	1.14721	0.0393702	-0.000129967	0.0314687	1.22733
62.0186	341	341		346	0.0446258	0.0289589	-0.000197881	0.0495072	1.00521	0.558919	-0.00115944	0.533387	0.09843	0.473707	-0.00103976	0.467065	0.933414	0.059741	-0.00094178	0.0800285	0.886015	0.0546936	-0.000111536	0.048734	0.422524	0.245204	0.000662504	0.246989	1.831	0.153468	-0.000900586	0.187829	1.4171	0.0923942	-0.00053242	0.16728	2.12581	0.0221121	-0.000282344	0.0639678	0.896813	0.024214	-0.000136538	0.0186209	0.299541	0.0392402	-0.000130135	0.0311497	0.615049
70.261	342	342		347	0.0446898	0.028762	-0.000195843	0.0495072	0.838878	0.557752	-0.00117328	0.533387	0.591428	0.47266	-0.00105416	0.467065	0.845497	0.0588061	-0.000927987	0.0792519	0.664634	0.0545851	-0.000105342	0.0485805	0	0.245873	0.000675819	0.246644	1.45937	0.152577	-0.000881339	0.186414	1.20005	0.09187	-0.000516018	0.166403	0.588718	0.0218316	-0.000278727	0.0633331	1.73534	0.0240801	-0.000131375	0.0183408	0.299971	0.03911	-0.000130199	0.030834	1.54137
0	343	343		348	0.853799	0.0285673	-0.00019347	0.0495072	0.505045	0.556573	-0.00118489	0.533387	0.693343	0.471598	-0.0010699	0.467065	0.803825	0.0578851	-0.000914075	0.0784829	0.890315	0.054483	-9.88934e-05	0.0484295	0.424575	0.246556	0.00068964	0.246302	0.578311	0.151705	-0.000862309	0.18501	1.31461	0.0913623	-0.000499388	0.16553	0.551031	0.0215547	-0.00027503	0.0627048	0.901165	0.0239513	-0.000126278	0.0180649	0.703325	0.0389798	-0.000130176	0.0305215	0.772543
96.3141	344	344		349	0.183041	0.0283752	-0.000190804	0.0495072	0.343589	0.555384	-0.00119341	0.533387	0.808469	0.47052	-0.0010855	0.467065	0.59202	0.056978	-0.00090013	0.0777213	0.680555	0.0543874	-9.21345e-05	0.0482809	0.433266	0.247252	0.00070361	0.245963	1.0174	0.150852	-0.000843587	0.183617	0.44643	0.0908712	-0.000482662	0.164662	1.0055	0.0212815	-0.000271285	0.0620826	0.985861	0.0238275	-0.000121281	0.0177931	0.307156	0.0388497	-0.000130122	0.0302122	0.473014
67.3408	345	345		350	0.0919532	0.0281858	-0.000187848	0.0495072	0.690426	0.554187	-0.00119875	0.533387	0.507048	0.469427	-0.00110081	0.467065	1.78994	0.0560849	-0.00088616	0.076967	0.683772	0.0542988	-8.50646e-05	0.0481346	0.435314	0.247963	0.000717695	0.245627	1.33346	0.150018	-0.000825182	0.182235	0.898203	0.090397	-0.000465854	0.163798	2.10876	0.0210121	-0.000267494	0.0614667	2.05024	0.0237087	-0.000116389	0.0175254	0.463427	0.0387196	-0.000130043	0.0299059	0.633667
84.8761	346	346		351	0.0464489	0.0279996	-0.000184603	0.0495072	0.348759	0.552987	-0.00120092	0.533387	0.512256	0.468319	-0.00111584	0.467065	0.739853	0.0552057	-0.000872165	0.0762201	0.230265	0.0542174	-7.76837e-05	0.0479907	0.439786	0.248688	0.000731894	0.245294	1.17775	0.149202	-0.000807093	0.180862	1.02072	0.0899396	-0.000448964	0.162939	1.14358	0.0207466	-0.000263659	0.0608568	1.13386	0.0235947	-0.000111601	0.0172618	0.52015	0.0385896	-0.000129938	0.0296028	0.80022
151.244	347	347		352	0	0.0278167	-0.00018107	0.0495072	0.52706	0.551786	-0.00119993	0.533386	0	0.467196	-0.00113058	0.467065	0.932329	0.0543405	-0.000858144	0.0754805	0.347987	0.0541436	-6.99952e-05	0.0478491	0.886165	0.249427	0.000746249	0.244964	0.676221	0.148404	-0.000789319	0.1795	0.570681	0.0894991	-0.000431996	0.162085	0.82238	0.0204848	-0.000259779	0.0602531	0.470224	0.0234854	-0.000106916	0.0170021	0.20941	0.0384597	-0.000129805	0.0293028	0.322487
47.3442	348	348		353	0.0938699	0.0276375	-0.000177296	0.0495072	1.4114	0.550588	-0.00119642	0.533386	0.62114	0.466058	-0.00114495	0.467065	0.607216	0.0534894	-0.000844115	0.074748	1.39837	0.0540775	-6.20917e-05	0.0477098	0	0.250181	0.00076155	0.244637	1.16569	0.147623	-0.000771787	0.178149	0.45789	0.0890755	-0.000415105	0.161234	1.40443	0.020227	-0.000255891	0.0596553	1.5514	0.0233808	-0.000102323	0.0167463	0.683639	0.03833	-0.000129559	0.0290058	0.646875
314.765	349	349		354	0.0942737	0.0274622	-0.000173317	0.0495072	0.884812	0.549394	-0.00119094	0.533386	0.519843	0.464906	-0.00115904	0.467065	0.375171	0.0526523	-0.000830112	0.0740227	0	0.0540194	-5.40388e-05	0.0475727	0.4463	0.25095	0.000777995	0.244312	0.266972	0.14686	-0.000754426	0.176807	0.114965	0.0886688	-0.000398398	0.160389	0.0413143	0.019973	-0.000252019	0.0590634	0	0.0232807	-9.78279e-05	0.0164944	0.105465	0.0382007	-0.000129123	0.0287118	0.487244
62.3183	350	350		355	0.0471882	0.0272909	-0.000169132	0.0495072	0.885776	0.548207	-0.0011835	0.533386	0.624492	0.46374	-0.00117286	0.467065	0.798518	0.0518292	-0.000816136	0.0733043	0.701791	0.0539695	-4.58376e-05	0.0474378	0	0.251737	0.000795577	0.243991	1.17198	0.146114	-0.000737235	0.175476	0.575451	0.0882787	-0.000381878	0.159548	0.66299	0.019723	-0.000248163	0.0584774	0.948308	0.0231851	-9.34323e-05	0.0162462	0.475639	0.0380718	-0.000128495	0.0284208	1.79013
122.708	351	351		356	0	0.027124	-0.000164757	0.0495072	1.28454	0.547028	-0.00117442	0.533386	0.215319	0.46256	-0.00118611	0.467065	0.582977	0.05102	-0.000802219	0.072593	0.362956	0.0539278	-3.75204e-05	0.047305	0	0.252542	0.000814147	0.243672	0.705311	0.145386	-0.000720296	0.174154	0.714277	0.087905	-0.000365597	0.158711	0.728559	0.0194767	-0.000244329	0.0578972	0.419788	0.0230938	-8.91497e-05	0.0160018	0.327628	0.0379437	-0.000127699	0.0281327	0.16818
55.3577	352	352		357	0.0490234	0.0269615	-0.000160224	0.0495072	1.84229	0.545858	-0.00116433	0.533386	0.432519	0.461368	-0.0011987	0.467065	1.17251	0.0502247	-0.000788419	0.0718885	1.82636	0.0538944	-2.91494e-05	0.0471744	1.39249	0.253366	0.000833413	0.243356	1.6266	0.144674	-0.000703636	0.172843	0.717397	0.0875474	-0.000349657	0.157878	2.59697	0.0192343	-0.000240371	0.0573228	1.90362	0.0230068	-8.50069e-05	0.0157611	0.384451	0.0378165	-0.000126778	0.0278476	1.18409
116.338	353	353		358	0.0987559	0.0268036	-0.000155572	0.0495072	1.11226	0.544699	-0.00115404	0.533386	0	0.460163	-0.00121046	0.467065	0.491138	0.0494431	-0.000774785	0.0711909	0.367178	0.0538695	-2.08034e-05	0.0470459	0	0.254209	0.000853007	0.243043	1.14914	0.143978	-0.000687227	0.171542	0.120431	0.0872055	-0.000334187	0.15705	0.563487	0.018996	-0.00023624	0.056754	0.566935	0.0229238	-8.10373e-05	0.015524	0.331439	0.0376902	-0.000125788	0.0275653	0.340273
55.144	354	354		359	0.149592	0.0266504	-0.000150823	0.0495072	1.68667	0.54355	-0.00114397	0.533386	0.219967	0.458947	-0.00122116	0.467065	0.893837	0.0486751	-0.000761323	0.0705001	1.3608	0.0538528	-1.25244e-05	0.0469194	0.944238	0.255072	0.000872729	0.242733	1.73272	0.143299	-0.000671086	0.17025	0.60808	0.0868788	-0.000319253	0.156227	1.57991	0.0187619	-0.00023195	0.056191	3.01695	0.0228446	-7.72591e-05	0.0152904	0.7263	0.0375649	-0.000124759	0.0272859	0.515432
266.351	355	355		360	0.049951	0.026502	-0.000145976	0.0495072	0.562582	0.542411	-0.00113412	0.533386	0.992683	0.457721	-0.00123078	0.467065	0.0992683	0.0479204	-0.000748033	0.0698159	0.123813	0.0538444	-4.3125e-06	0.046795	0.472944	0.255954	0.00089258	0.242425	0.56685	0.142636	-0.000655212	0.168968	0.121828	0.0865668	-0.000304857	0.155407	0.218904	0.0185322	-0.000227503	0.0556335	0.1432	0.0227692	-7.36722e-05	0.0150604	0.0558809	0.0374407	-0.000123689	0.0270094	0.172111
231.524	356	356		361	0	0.0263584	-0.000141032	0.0495072	0.380617	0.541282	-0.0011245	0.533386	2.12886	0.456486	-0.00123933	0.467065	0.151111	0.047179	-0.000734915	0.0691384	0	0.0538442	3.83219e-06	0.0466726	0.479959	0.256857	0.00091256	0.24212	0.182799	0.141989	-0.000639607	0.167695	0.123635	0.0862689	-0.000290998	0.154592	0	0.018307	-0.000222897	0.0550815	0	0.0226972	-7.02767e-05	0.0148338	0.226839	0.0373175	-0.00012258	0.0267356	0
0	357	357		362	0.814094	0.0262199	-0.000135994	0.0495072	1.33653	0.540162	-0.00111519	0.533386	2.24593	0.455243	-0.00124677	0.467065	1.11322	0.0464505	-0.000721968	0.0684675	0.755292	0.053852	1.19002e-05	0.0465521	1.92339	0.257779	0.000932622	0.241818	1.28771	0.141357	-0.000624253	0.166433	0.619321	0.0859846	-0.000277693	0.153781	0.981942	0.0180864	-0.000218136	0.054535	0.87501	0.0226286	-6.70766e-05	0.0146107	1.13913	0.0371955	-0.000121438	0.0264646	2.10334
291.945	358	358		363	0.206996	0.0260865	-0.000130884	0.0495072	0	0.539051	-0.00110659	0.533386	0.228283	0.453993	-0.00125293	0.467065	0.514721	0.045735	-0.000709191	0.0678031	0	0.0538679	1.98517e-05	0.0464336	0.489967	0.258722	0.000952577	0.241518	0.133104	0.14074	-0.000609086	0.165179	0.252427	0.0857133	-0.000265004	0.152975	0.0907133	0.0178707	-0.000213234	0.0539939	0.222531	0.022563	-6.40886e-05	0.0143909	0	0.0370747	-0.00012029	0.0261964	0.891529
288.173	359	359		364	0	0.0259582	-0.000125703	0.0495072	0.585916	0.537949	-0.00109878	0.533386	0.919111	0.452738	-0.0012578	0.467065	0.258464	0.0450321	-0.000696584	0.0671451	0.128949	0.0538917	2.768e-05	0.0463169	0	0.259684	0.000972393	0.241221	0.294645	0.140138	-0.000594103	0.163936	0.380645	0.0854544	-0.000252937	0.152172	0.0455967	0.01766	-0.000208192	0.0534582	0	0.0225003	-6.13156e-05	0.0141744	0.0581987	0.036955	-0.000119142	0.0259309	0.716998
68.6214	360	360		365	0.052447	0.0258351	-0.00012047	0.0495072	1.77405	0.536853	-0.00109214	0.533386	1.39049	0.451478	-0.00126133	0.467065	1.67391	0.0443417	-0.000684142	0.0664936	1.4313	0.0539232	3.53473e-05	0.0462021	0.496577	0.260667	0.000991888	0.240927	1.30259	0.139552	-0.000579361	0.162701	2.0505	0.0852073	-0.000241468	0.151374	1.19886	0.0174544	-0.000203024	0.0529279	2.18767	0.0224403	-5.87734e-05	0.0139611	0.705253	0.0368364	-0.000118018	0.0256681	1.62821
149.998	361	361		366	0.105177	0.0257173	-0.000115199	0.0495072	0.394857	0.535764	-0.00108679	0.533386	0.695957	0.450215	-0.00126353	0.467065	0.785389	0.0436637	-0.000671876	0.0658483	0	0.0539623	4.28268e-05	0.0460892	0.497915	0.261668	0.00101093	0.240635	1.16921	0.13898	-0.000564895	0.161476	0.256522	0.0849713	-0.00023061	0.15058	0.600123	0.017254	-0.000197737	0.0524027	0.679175	0.0223827	-5.6473e-05	0.0137511	0.176494	0.0367189	-0.000116938	0.0254079	0.543594
0	362	362		367	0.842991	0.0256047	-0.000109906	0.0495072	0.987142	0.534679	-0.00108273	0.533386	0.81311	0.448951	-0.00126448	0.467065	1.09996	0.0429979	-0.000659818	0.0652093	0.782102	0.0540088	5.008e-05	0.0459781	0.99583	0.262688	0.00102934	0.240346	2.04761	0.138422	-0.000550741	0.16026	0.769565	0.0847458	-0.000220422	0.14979	0.230462	0.017059	-0.000192345	0.0518828	1.51137	0.0223273	-5.44306e-05	0.0135442	0.647733	0.0366025	-0.000115928	0.0251504	0.181198
0	363	363		368	1.00969	0.0254974	-0.000104607	0.0495072	1.19452	0.533598	-0.00108017	0.533386	0.701802	0.447687	-0.00126418	0.467065	0.738764	0.042344	-0.000647971	0.0645765	0.78867	0.0540624	5.70783e-05	0.0458687	0.502097	0.263727	0.00104697	0.240059	0.848672	0.137878	-0.000536892	0.159053	1.55464	0.0845302	-0.000210875	0.149005	0.651642	0.0168693	-0.000186856	0.0513681	0.380066	0.0222737	-5.26241e-05	0.0133405	1.30872	0.036487	-0.000115006	0.0248955	1.09632
106.952	364	364		369	0.106231	0.0253955	-9.93321e-05	0.0495072	0.598221	0.532519	-0.00107848	0.533386	0.117155	0.446423	-0.00126264	0.467065	0.952123	0.0417019	-0.000636314	0.0639498	0.131657	0.0541229	6.37544e-05	0.0457611	0.502905	0.264782	0.00106352	0.239775	1.15333	0.137348	-0.000523265	0.157855	0.259092	0.0843239	-0.000201985	0.148223	0.792819	0.0166853	-0.000181292	0.0508584	0.991286	0.022222	-5.09863e-05	0.0131398	0.297105	0.0363724	-0.00011422	0.0246431	0
154.159	365	365		370	0	0.0252988	-9.41067e-05	0.0495072	0.803602	0.531441	-0.00107664	0.533386	0.472131	0.445162	-0.00126016	0.467065	0.425922	0.0410714	-0.000624817	0.0633293	0.265286	0.0541898	7.00561e-05	0.0456553	1.52002	0.265853	0.00107939	0.239493	1.16197	0.136831	-0.000509792	0.156667	1.04544	0.084126	-0.000193835	0.147446	1.08158	0.0165068	-0.000175668	0.0503538	0.767826	0.0221717	-4.95137e-05	0.0129421	0.119732	0.0362585	-0.000113602	0.0243934	1.10631
102.033	366	366		371	0.107828	0.0252072	-8.89385e-05	0.0495072	0.40481	0.530366	-0.00107437	0.533386	0.237833	0.443903	-0.00125689	0.467065	0.858758	0.0404522	-0.000613475	0.0627147	0.400908	0.0542628	7.59668e-05	0.0455511	0	0.266941	0.0010948	0.239214	1.73257	0.136328	-0.000496456	0.155487	0.921772	0.0839359	-0.00018645	0.146672	1.3751	0.0163339	-0.000169991	0.0498542	1.39414	0.0221229	-4.82131e-05	0.0127474	0.361886	0.0361452	-0.000113166	0.0241461	0.557297
0	367	367		372	0.975796	0.0251209	-8.38273e-05	0.0495072	2.03272	0.529293	-0.00107166	0.533386	0.836339	0.442648	-0.00125282	0.467065	1.02335	0.0398444	-0.000602285	0.0621061	1.07393	0.0543416	8.14865e-05	0.0454486	0.51214	0.268043	0.00110975	0.238937	1.99257	0.135838	-0.000483257	0.154316	1.05672	0.0837529	-0.00017983	0.145903	1.18855	0.0161668	-0.000164259	0.0493596	1.63208	0.0220752	-4.70844e-05	0.0125556	1.63927	0.0360321	-0.000112911	0.0239014	0.931873
50.4872	368	368		373	1.6981	0.0250396	-7.87821e-05	0.0495072	0.61476	0.528222	-0.00106869	0.533386	0.601971	0.441398	-0.00124794	0.467065	0.597156	0.0392476	-0.000591263	0.0615034	0.270593	0.0544257	8.66342e-05	0.0453477	2.06724	0.26916	0.00112426	0.238663	1.5261	0.135362	-0.000470201	0.153154	0.532511	0.083576	-0.000174004	0.145138	0.191365	0.0160054	-0.000158479	0.0488699	0.940451	0.0220286	-4.61355e-05	0.0123667	0.305319	0.0359193	-0.000112849	0.0236591	0.752295
104.84	369	369		374	0.0547607	0.0249633	-7.38399e-05	0.0495072	1.2335	0.527155	-0.00106625	0.533386	0.362353	0.440153	-0.00124222	0.467065	1.36414	0.0386618	-0.000580467	0.0609066	0.54294	0.0545148	9.14903e-05	0.0452485	0.518483	0.270291	0.00113841	0.238391	1.47414	0.134898	-0.000457311	0.152001	0.667796	0.0834045	-0.000169096	0.144377	2.02593	0.0158499	-0.000152674	0.048385	0.550243	0.0219829	-4.5399e-05	0.0121807	0.122523	0.0358063	-0.000113034	0.0234193	2.26797
121.772	370	370		375	0	0.0248919	-6.9005e-05	0.0495072	0.414055	0.52609	-0.00106443	0.533386	0.48653	0.438914	-0.00123564	0.467065	0.548502	0.0380866	-0.000569904	0.0603156	0.410064	0.0546086	9.6064e-05	0.0451508	0	0.271437	0.00115221	0.238122	0.711182	0.134447	-0.000444589	0.150856	0.806982	0.0832375	-0.000165121	0.143619	0.969085	0.0157001	-0.000146847	0.047905	0.395226	0.0219378	-4.48786e-05	0.0119975	0.308459	0.0356931	-0.000113472	0.023182	0.570024
119.683	371	371		376	0.0553567	0.0248252	-6.42774e-05	0.0495072	1.24693	0.525026	-0.00106323	0.533386	0.488396	0.437682	-0.00122822	0.467065	0.771178	0.0375219	-0.000559573	0.0597303	0.274424	0.0547068	0.000100355	0.0450547	0	0.272596	0.00116567	0.237855	0.685432	0.134009	-0.000432037	0.14972	0.675064	0.083074	-0.000162078	0.142866	0.680233	0.0155562	-0.000140998	0.0474297	0.47609	0.0218931	-4.45743e-05	0.011817	0.309642	0.0355793	-0.000114163	0.022947	0.381473
155.619	372	372		377	0	0.0247633	-5.96571e-05	0.0495072	0	0.523963	-0.00106265	0.533386	0.122228	0.436457	-0.00121995	0.467065	0.882673	0.0369674	-0.000549475	0.0591506	0.274715	0.0548092	0.000104364	0.0449602	0.524682	0.273768	0.00117878	0.23759	0.743457	0.133583	-0.000419653	0.148593	0.540623	0.082913	-0.000159968	0.142117	0.389047	0.0154181	-0.000135127	0.0469591	0.476594	0.0218486	-4.44862e-05	0.0116392	0.434578	0.0354647	-0.000115106	0.0227144	1.52942
253.996	373	373		378	0.11326	0.0247059	-5.51441e-05	0.0495072	0.212602	0.5229	-0.00106269	0.533386	1.25033	0.435242	-0.00121083	0.467065	0.225084	0.0364228	-0.000539609	0.0585766	0.140369	0.0549154	0.00010809	0.0448671	0.536183	0.274953	0.00119155	0.237327	0.116527	0.133169	-0.000407439	0.147474	0.276237	0.0827537	-0.000158789	0.141371	0.148905	0.0152859	-0.000129234	0.0464932	0.162347	0.021804	-4.46141e-05	0.0114641	0.190059	0.035349	-0.000116303	0.0224842	0.780498
83.9583	374	374		379	0.0566266	0.0246529	-5.07384e-05	0.0495072	0.425178	0.521837	-0.00106335	0.533386	0.1249	0.434036	-0.00120085	0.467065	0.676335	0.0358881	-0.000529977	0.0580082	0.14036	0.0550253	0.000111534	0.0447756	0	0.276151	0.00120397	0.237067	1.37697	0.132768	-0.000395393	0.146364	0.41433	0.0825951	-0.000158544	0.14063	1.6443	0.0151597	-0.000123319	0.0460319	0.405843	0.0217593	-4.49581e-05	0.0112916	0.507426	0.035232	-0.000117752	0.0222563	0.390225
206.169	375	375		380	0.113499	0.0246044	-4.64445e-05	0.0495072	0.21305	0.520773	-0.00106451	0.533386	0.125171	0.432841	-0.00119002	0.467065	0.847535	0.0353628	-0.000520583	0.0574453	0.140665	0.0551384	0.000114685	0.0446855	0.537314	0.277361	0.00121599	0.236809	0.497159	0.132379	-0.000383514	0.145261	0.41523	0.0824363	-0.000159245	0.139892	0.248698	0.0150393	-0.000117368	0.0455752	0	0.021714	-4.55223e-05	0.0111218	0.126973	0.0351134	-0.000119422	0.0220307	0
263.607	376	376		381	0.114306	0.02456	-4.22732e-05	0.0495072	0.214566	0.519708	-0.00106593	0.533386	0.756369	0.431656	-0.00117841	0.467065	0.796205	0.0348468	-0.000511401	0.0568878	0.141665	0.0552545	0.000117481	0.0445969	0	0.278583	0.00122755	0.236554	0.737078	0.132001	-0.000371782	0.144168	0.696972	0.0822763	-0.000160987	0.139158	0.200373	0.014925	-0.000111326	0.045123	0	0.0216681	-4.63312e-05	0.0109544	0.127876	0.0349931	-0.000121195	0.0218074	0.196927
0	377	377		382	1.03153	0.0245198	-3.82357e-05	0.0495072	1.93416	0.518641	-0.00106819	0.533386	1.01023	0.430484	-0.00116635	0.467065	1.2534	0.03434	-0.000502314	0.0563358	1.56047	0.0553732	0.000119835	0.0445097	1.08279	0.279816	0.00123859	0.2363	1.39043	0.131635	-0.000360219	0.143082	1.53546	0.082114	-0.000163816	0.138429	1.25644	0.0148167	-0.000105211	0.0446754	1.06715	0.0216213	-4.7419e-05	0.0107896	0.961446	0.034871	-0.000123109	0.0215864	0.591061
207.835	378	378		383	0	0.0244835	-3.43731e-05	0.0495072	1.28907	0.517571	-0.00107172	0.533386	0.504902	0.429324	-0.001154	0.467065	0.683512	0.0338422	-0.000493338	0.0557891	0	0.055494	0.000121655	0.0444239	0	0.281059	0.00124866	0.236049	0.738037	0.13128	-0.000348869	0.142004	0.418727	0.0819483	-0.000167824	0.137702	0.502087	0.0147146	-9.90468e-05	0.0442321	0.16406	0.0215732	-4.8822e-05	0.0106273	0.192064	0.0347469	-0.000125225	0.0213676	0.197183
186.158	379	379		384	0	0.024451	-3.07063e-05	0.0495072	0.429743	0.516497	-0.00107658	0.533386	0.252482	0.428176	-0.00114154	0.467065	1.08283	0.0333533	-0.000484506	0.0552477	0.283734	0.0556164	0.000123008	0.0443394	1.62572	0.282313	0.0012575	0.2358	0.975436	0.130937	-0.000337779	0.140935	0.837558	0.0817779	-0.000173086	0.13698	0.40182	0.0146186	-9.28473e-05	0.0437933	0.821222	0.0215235	-5.05601e-05	0.0104674	0.320146	0.0346205	-0.000127573	0.021151	0.394415
251.401	380	380		385	0.0574339	0.024422	-2.72289e-05	0.0495072	0.862478	0.515418	-0.00108216	0.533386	0.888031	0.427041	-0.00112936	0.467065	0.457127	0.0328731	-0.000475861	0.0547116	0	0.0557399	0.000123964	0.0442563	1.08759	0.283574	0.00126531	0.235553	0.532995	0.130605	-0.000326982	0.139874	0.700395	0.0816017	-0.000179709	0.136262	0.0503394	0.0145289	-8.66322e-05	0.0433588	0.164652	0.0214719	-5.26617e-05	0.01031	0.192756	0.0344916	-0.000130199	0.0209367	0.791575
195.908	381	381		386	0.0577558	0.0243965	-2.38854e-05	0.0495072	0.433656	0.514333	-0.00108856	0.533386	0.893008	0.425917	-0.00111783	0.467065	0.4023	0.0324015	-0.000467383	0.0541807	0.143159	0.0558642	0.000124623	0.0441746	0.546841	0.284843	0.00127261	0.235309	0.267694	0.130283	-0.000316552	0.138821	0.140864	0.0814182	-0.000187166	0.135547	0.4561	0.0144453	-8.04247e-05	0.0429286	0	0.0214181	-5.51107e-05	0.0101549	0	0.03436	-0.000133055	0.0207244	0.398006
89.9824	382	382		387	0.0578812	0.0243742	-2.06276e-05	0.0495072	1.74056	0.513241	-0.00109603	0.533386	0.383002	0.424805	-0.00110714	0.467065	0.979464	0.0319383	-0.00045903	0.0536549	0.860818	0.0559891	0.000125109	0.0440941	0.548029	0.286119	0.00127983	0.235066	1.19667	0.129971	-0.000306541	0.137775	0.42351	0.0812272	-0.00019497	0.134836	1.68073	0.014368	-7.42333e-05	0.0425027	1.1632	0.0213616	-5.78785e-05	0.0100021	0.388515	0.0342255	-0.000136077	0.0205144	0.598305
113.424	383	383		388	0.0580181	0.0243552	-1.74708e-05	0.0495072	0.217813	0.51214	-0.00110452	0.533386	0.255938	0.423702	-0.00109745	0.467065	1.15588	0.0314834	-0.000450822	0.0531342	0.143809	0.0561144	0.000125385	0.044015	0.549325	0.287403	0.00128679	0.234826	0.658396	0.12967	-0.000296935	0.136738	0.849023	0.0810282	-0.000203172	0.134129	0.764297	0.0142969	-6.80671e-05	0.042081	0.582974	0.0213022	-6.09783e-05	0.00985162	0.259623	0.0340878	-0.000139285	0.0203065	0.199907
201.056	384	384		389	0	0.0243392	-1.44236e-05	0.0495072	0	0.511031	-0.00111402	0.533386	0.384261	0.422609	-0.00108884	0.467065	0.230813	0.0310366	-0.000442771	0.0526186	0	0.0562398	0.000125432	0.0439371	0	0.288693	0.00129339	0.234588	0.418823	0.129377	-0.000287727	0.135708	0.566537	0.0808207	-0.000211801	0.133425	0.101797	0.0142319	-6.19313e-05	0.0416635	0.0832399	0.0212395	-6.4418e-05	0.00970342	0.0649655	0.0339468	-0.000142692	0.0201006	0.400182
127.85	385	385		390	0.0582963	0.0243263	-1.14914e-05	0.0495072	0.437715	0.509912	-0.00112448	0.533386	0	0.421524	-0.00108141	0.467065	0.173779	0.0305978	-0.000434883	0.052108	0.144499	0.0563651	0.000125238	0.0438604	1.10392	0.289989	0.00129974	0.234352	0.842386	0.129094	-0.000278916	0.134686	0.996698	0.0806044	-0.000220875	0.132726	1.12716	0.014173	-5.5829e-05	0.0412501	1.17154	0.0211733	-6.82022e-05	0.00955744	0.260868	0.0338023	-0.000146306	0.0198969	0.803462
75.7198	386	386		391	0	0.0243162	-8.66953e-06	0.0495072	1.98901	0.508782	-0.00113581	0.533386	0.518794	0.420446	-0.00107542	0.467065	1.58284	0.0301668	-0.000427155	0.0516023	0.874514	0.0564902	0.000124754	0.043785	0.556748	0.291292	0.00130624	0.234118	1.46042	0.12882	-0.000270484	0.133672	0.71708	0.0803788	-0.000230404	0.132029	0.877702	0.0141202	-4.97629e-05	0.0408408	1.52054	0.021103	-7.22885e-05	0.00941366	0.461137	0.0336541	-0.000150093	0.0196953	0.202608
0	387	387		392	1.1209	0.024309	-5.82344e-06	0.0495072	0.663042	0.50764	-0.00114792	0.533386	1.0401	0.419373	-0.00107008	0.467065	0.820133	0.0297435	-0.000419435	0.0511016	1.02292	0.0566145	0.000123911	0.0437108	0	0.292602	0.00131309	0.233886	0.881274	0.128553	-0.000262401	0.132665	1.86946	0.0801436	-0.000240089	0.131337	0.671816	0.0140735	-4.36933e-05	0.0404356	0.929084	0.0210287	-7.63054e-05	0.00927204	1.18811	0.0335022	-0.000153696	0.0194956	0.608534
280.033	388	388		393	0.0589584	0.0243046	-2.90844e-06	0.0495072	0.221343	0.506486	-0.00116114	0.533386	1.56312	0.418306	-0.00106501	0.467065	0.234338	0.0293279	-0.000411659	0.0506057	0.14614	0.0567379	0.00012288	0.0436378	1.11646	0.293919	0.00132025	0.233656	0.242939	0.128295	-0.000254725	0.131666	0.431392	0.0798987	-0.000249506	0.130648	0	0.0140328	-3.76256e-05	0.0400345	0.0845111	0.0209505	-8.01203e-05	0.00913255	0.0659577	0.0333468	-0.000157079	0.019298	0
103.257	389	389		394	0	0.0243032	6.9628e-08	0.0495072	0.446945	0.505317	-0.00117587	0.533386	1.18296	0.417243	-0.00105989	0.467065	1.06703	0.0289202	-0.000403833	0.0501146	1.18184	0.0568603	0.000121825	0.043566	0.563599	0.295242	0.00132747	0.233428	1.3853	0.128044	-0.000247489	0.130675	0.725903	0.0796447	-0.000258567	0.129963	1.2031	0.0139982	-3.15719e-05	0.0396373	1.28242	0.0208685	-8.37221e-05	0.00899516	0.332961	0.0331881	-0.00016027	0.0191024	0.205101
47.1695	390	390		395	0.0595563	0.0243047	3.10951e-06	0.0495072	1.11794	0.504133	-0.00119249	0.533386	0.131362	0.416186	-0.00105464	0.467065	1.06758	0.0285203	-0.000395975	0.0496283	0.590488	0.0569816	0.000120846	0.0434953	0	0.296574	0.00133454	0.233202	1.26224	0.127799	-0.000240658	0.129691	0.435767	0.0793817	-0.000267292	0.129281	1.57173	0.0139697	-2.5542e-05	0.039244	1.45382	0.0207831	-8.70941e-05	0.00885983	0.600305	0.0330263	-0.000163294	0.0189088	0.410414
58.6128	391	391		396	0	0.0243094	6.21702e-06	0.0495072	1.34485	0.502932	-0.00121117	0.533386	0.263375	0.415134	-0.00104943	0.467065	0.65317	0.0281282	-0.00038811	0.0491467	1.18538	0.057102	0.000120003	0.0434257	1.13057	0.297911	0.00134113	0.232978	1.17231	0.127562	-0.00023413	0.128714	0.728077	0.0791102	-0.000275672	0.128603	0.523813	0.0139471	-1.95517e-05	0.0388546	1.02867	0.0206945	-9.01761e-05	0.00872655	0.802835	0.0328616	-0.000166149	0.0187172	0.617146
113.389	392	392		397	0.179448	0.0243172	9.35722e-06	0.0495072	0	0.501711	-0.00123138	0.533386	0.527738	0.414087	-0.00104392	0.467065	0.952767	0.027744	-0.000380245	0.0486697	0.593061	0.0572216	0.000119216	0.0433573	0	0.299255	0.00134678	0.232756	1.05051	0.127331	-0.000227886	0.127745	0.583555	0.0788305	-0.000283738	0.127929	0.787981	0.0139305	-1.36218e-05	0.0384691	0.514441	0.0206029	-9.29248e-05	0.00859527	0.267668	0.0326941	-0.000168794	0.0185275	0
151.628	393	393		398	0.0598314	0.0243281	1.25256e-05	0.0495072	0.673862	0.500468	-0.0012535	0.533386	0.791813	0.413046	-0.00103801	0.467065	0.535662	0.0273677	-0.000372403	0.0481974	0.148304	0.0573405	0.000118429	0.0432899	0.566494	0.300605	0.00135123	0.232536	0.864569	0.127106	-0.00022184	0.126783	0.583706	0.0785428	-0.000291556	0.127258	0.946031	0.0139198	-7.76553e-06	0.0380875	0.601195	0.0205087	-9.53524e-05	0.00846596	0.0669343	0.0325241	-0.000171255	0.0183397	0.824619
135.85	394	394		399	0.0598793	0.0243423	1.57899e-05	0.0495072	0.6744	0.499203	-0.0012779	0.533386	0.132074	0.412011	-0.0010319	0.467065	0.953776	0.0269992	-0.000364615	0.0477297	0	0.0574585	0.000117599	0.0432237	0	0.301957	0.00135412	0.232318	1.05162	0.126887	-0.00021593	0.125829	0.876259	0.0782474	-0.000299189	0.12659	0.89378	0.013915	-1.99899e-06	0.0377096	0.343324	0.0204123	-9.74828e-05	0.0083386	0	0.0323516	-0.000173572	0.0181538	0
129.408	395	395		400	0.0598909	0.0243597	1.91266e-05	0.0495072	0.674532	0.497912	-0.00130368	0.533386	0.2642	0.410983	-0.00102554	0.467065	0.953961	0.0266385	-0.000356923	0.0472666	0.445354	0.0575757	0.000116767	0.0431585	1.13411	0.303312	0.00135499	0.232102	0.772385	0.126674	-0.000210224	0.124881	0.292143	0.0779445	-0.000306595	0.125926	1.05248	0.0139158	3.65649e-06	0.0373355	0.515086	0.0203138	-9.93473e-05	0.00821315	0.268003	0.032177	-0.000175792	0.0179698	0.20636
125.426	396	396		401	0.120364	0.0243805	2.25087e-05	0.0495072	1.12969	0.496595	-0.00133045	0.533386	0.265485	0.40996	-0.00101909	0.467065	0.778601	0.0262853	-0.000349356	0.0468079	0.895039	0.057692	0.000115893	0.0430943	0.569815	0.304667	0.00135352	0.231888	0.963133	0.126467	-0.000204782	0.123941	0.73391	0.0776343	-0.000313834	0.125266	0.369765	0.0139222	9.18556e-06	0.036965	0.690984	0.0202137	-0.000100968	0.00808959	0.20198	0.0320001	-0.000177953	0.0177877	0.62209
121.738	397	397		402	0.0604315	0.0244047	2.58831e-05	0.0495072	2.271	0.495251	-0.00135702	0.533386	0.133292	0.408944	-0.00101253	0.467065	1.98939	0.0259397	-0.000341896	0.0463537	0.149791	0.0578074	0.000114953	0.0430312	0.572175	0.306018	0.00134942	0.231675	0.685783	0.126265	-0.000199626	0.123007	0.73695	0.0773168	-0.000321073	0.124609	0.796089	0.0139341	1.45579e-05	0.0365983	0.693846	0.020112	-0.00010239	0.00796789	0.270422	0.031821	-0.000180123	0.0176074	0.624667
129.02	398	398		403	0.121254	0.0244323	2.92219e-05	0.0495072	0.227608	0.493881	-0.0013827	0.533386	0.401171	0.407935	-0.00100579	0.467065	0.301212	0.0256015	-0.000334524	0.0459038	0.450828	0.0579219	0.000113944	0.042969	0.574027	0.307365	0.0013426	0.231465	1.37944	0.126068	-0.000194754	0.122081	1.03655	0.0769921	-0.000328402	0.123955	0.425636	0.0139513	1.97575e-05	0.0362352	0.782995	0.0200089	-0.000103635	0.00784802	0.611098	0.0316398	-0.00018234	0.0174289	0.208896
191.56	399	399		404	0	0.0244632	3.25252e-05	0.0495072	0	0.492486	-0.00140747	0.533386	0.133814	0.406933	-0.000998864	0.467065	0.301417	0.0252706	-0.000327241	0.0454584	0	0.0580353	0.000112865	0.0429079	0	0.308703	0.00133306	0.231256	0.656949	0.125875	-0.000190169	0.121162	0	0.07666	-0.000335822	0.123305	0.425925	0.0139736	2.47845e-05	0.0358757	0.173924	0.0199048	-0.000104705	0.00772996	0.135741	0.0314564	-0.000184603	0.0172523	1.04519
0	400	400		405	1.15791	0.0244973	3.57841e-05	0.0495072	0.228312	0.491067	-0.00143153	0.533386	0.804824	0.405938	-0.00099174	0.467065	1.45452	0.024947	-0.00032004	0.0450172	1.35817	0.0581476	0.000111697	0.0428478	2.87902	0.31003	0.0013214	0.231049	1.47881	0.125687	-0.000185838	0.120249	0.296649	0.0763204	-0.000343359	0.122658	0.533558	0.0140008	2.96338e-05	0.0355197	1.57258	0.0197996	-0.000105605	0.00761367	1.09059	0.0312706	-0.000186924	0.0170774	0.83817
29.2777	401	401		406	0	0.0245347	3.89833e-05	0.0495072	0.230023	0.489623	-0.00145517	0.533386	0.270285	0.40495	-0.00098438	0.467065	0.792679	0.0246305	-0.000312908	0.0445804	0.455611	0.0582586	0.000110402	0.0427886	2.32047	0.311345	0.00130867	0.230844	1.77703	0.125503	-0.00018171	0.119344	0.896615	0.0759732	-0.000351063	0.122015	1.83338	0.0140328	3.42965e-05	0.0351673	1.58436	0.0196936	-0.000106349	0.00749913	0.411264	0.0310825	-0.000189323	0.0169043	0.844451
294.988	402	402		407	0	0.0245753	4.21615e-05	0.0495072	0.690388	0.488156	-0.00147839	0.533386	0.540821	0.403969	-0.00097692	0.467065	0.12182	0.0243211	-0.00030586	0.0441478	0.151941	0.0583683	0.000108947	0.0427303	0	0.312647	0.00129547	0.230641	0.442098	0.125324	-0.000177766	0.118445	0.299011	0.0756182	-0.000358976	0.121375	0.107454	0.0140693	3.87648e-05	0.0348184	0	0.0195869	-0.000106947	0.00738631	0.0685758	0.0308919	-0.000191817	0.016733	1.6918
159.584	403	403		408	0	0.024619	4.53496e-05	0.0495072	0.698435	0.486667	-0.00150119	0.533386	1.09562	0.402996	-0.000969469	0.467065	0.616815	0.0240188	-0.000298905	0.0437194	0	0.0584765	0.000107307	0.042673	0	0.313936	0.00128226	0.230439	0.960536	0.125148	-0.000173989	0.117553	0.151248	0.0752552	-0.000367131	0.120738	0.707677	0.0141102	4.30324e-05	0.034473	0.0888899	0.0194797	-0.000107409	0.00727519	0.13875	0.0306988	-0.000194419	0.0165634	0.213673
81.5946	404	404		409	0.250011	0.024666	4.85476e-05	0.0495072	0	0.485154	-0.00152356	0.533386	0.551443	0.40203	-0.000962028	0.467065	1.1204	0.0237233	-0.000292044	0.0432951	0.30985	0.0585829	0.000105481	0.0426167	0	0.315212	0.00126904	0.23024	1.29222	0.124976	-0.00017038	0.116668	0.304883	0.0748839	-0.00037553	0.120105	0.493586	0.0141553	4.70993e-05	0.0341309	0.89681	0.0193722	-0.000107735	0.00716574	0.0699227	0.030503	-0.000197131	0.0163955	0.215359
50.7676	405	405		410	0	0.0247161	5.17555e-05	0.0495072	2.35239	0.48362	-0.00154551	0.533386	1.10593	0.401072	-0.000954596	0.467065	0.934868	0.0234347	-0.000285277	0.042875	0.930956	0.0586874	0.000103471	0.0425612	0.592681	0.316474	0.0012558	0.230042	1.09935	0.124807	-0.000166939	0.11579	0.458016	0.0745041	-0.000384171	0.119475	0.93435	0.0142044	5.09655e-05	0.0337923	0.718713	0.0192643	-0.000107924	0.00705794	0.0700285	0.0303045	-0.000199951	0.0162293	1.51195
115.579	406	406		411	0	0.0247695	5.49631e-05	0.0495072	0.469891	0.482063	-0.00156703	0.533386	0.27607	0.400121	-0.000947002	0.467065	0.809645	0.0231527	-0.000278613	0.0424589	0.155121	0.0587897	0.00010125	0.0425066	0.592534	0.317723	0.00124241	0.229846	1.16379	0.124642	-0.000163702	0.114918	0.152634	0.0741155	-0.000393062	0.118848	0.439359	0.0142572	5.46252e-05	0.033457	0.718534	0.0191564	-0.000107984	0.00695176	0.490778	0.0301031	-0.000202893	0.0160648	0.862524
91.1822	407	407		412	0	0.0248261	5.81345e-05	0.0495072	0.470539	0.480486	-0.00158831	0.533386	0.276451	0.399178	-0.0009387	0.467065	0.810761	0.0228774	-0.000272087	0.0420469	0.776674	0.0588898	9.87349e-05	0.0424529	0	0.318959	0.00122842	0.229651	1.39331	0.124479	-0.000160797	0.114052	0.305689	0.0737179	-0.000402203	0.118225	1.48797	0.0143136	5.80577e-05	0.0331251	0.629697	0.0190484	-0.000107943	0.00684718	0.561562	0.0298987	-0.000206001	0.015902	0.215928
42.4986	408	408		413	1.06796	0.0248858	6.12663e-05	0.0495072	0.235429	0.478887	-0.00160937	0.533386	0.553277	0.398244	-0.000929647	0.467065	0.62375	0.0226085	-0.000265701	0.0416389	0.621761	0.0589871	9.59169e-05	0.0424	2.37502	0.32018	0.00121378	0.229458	0.258399	0.12432	-0.000158234	0.113194	0.611794	0.073311	-0.000411591	0.117605	0.329785	0.0143732	6.1261e-05	0.0327964	0.0898893	0.0189405	-0.000107804	0.00674417	0.843265	0.029691	-0.000209277	0.0157408	0.648225
103.109	409	409		414	0	0.0249486	6.43486e-05	0.0495072	0.944538	0.477267	-0.00163036	0.533386	0.554934	0.397319	-0.000919991	0.467065	0.563119	0.0223459	-0.000259437	0.0412348	0.467717	0.0590815	9.27726e-05	0.042348	0	0.321386	0.00119839	0.229267	2.02129	0.124163	-0.000155999	0.112341	0.306813	0.0728946	-0.000421254	0.116988	0.938844	0.014436	6.42295e-05	0.0324711	1.17386	0.0188328	-0.000107575	0.00664271	0.493261	0.0294801	-0.000212729	0.0155813	1.95267
155.065	410	410		415	0.0631189	0.0250144	6.73488e-05	0.0495072	0.710888	0.475626	-0.00165116	0.533386	0.6961	0.396404	-0.000910017	0.467065	0.753877	0.0220896	-0.000253244	0.0408346	0.312905	0.0591725	8.92245e-05	0.0422968	0	0.322576	0.00118234	0.229078	1.14131	0.124008	-0.000154089	0.111495	0.307889	0.0724683	-0.000431288	0.116374	1.38693	0.0145016	6.69443e-05	0.0321489	0.452374	0.0187254	-0.000107279	0.00654278	0.35306	0.0292656	-0.000216249	0.0154233	0.652447
320.662	411	411		416	0	0.0250833	7.02888e-05	0.0495072	0	0.473965	-0.00167125	0.533386	0.418117	0.395499	-0.000899715	0.467065	0.188361	0.0218394	-0.000247099	0.0404384	0.469871	0.0592598	8.53293e-05	0.0422465	1.19655	0.323751	0.00116617	0.22889	0.357882	0.123855	-0.000152471	0.110656	0.308226	0.0720319	-0.000441585	0.115764	0.0553827	0.0145698	6.94752e-05	0.0318299	0	0.0186183	-0.000106937	0.00644435	0.0706893	0.0290476	-0.000219779	0.015267	1.0886
93.7104	412	412		417	0	0.025155	7.32059e-05	0.0495072	1.42805	0.472284	-0.0016898	0.533386	0	0.394604	-0.000889425	0.467065	0.946821	0.0215954	-0.000241014	0.040046	0.314286	0.0593431	8.11861e-05	0.0421969	0.600259	0.324909	0.00115012	0.228704	1.70664	0.123703	-0.00015107	0.109822	1.08391	0.0715852	-0.000451846	0.115157	0.890729	0.0146405	7.19205e-05	0.0315141	1.09231	0.0185115	-0.000106583	0.0063474	0.283695	0.028826	-0.000223318	0.0151123	0.218442
38.1314	413	413		418	0	0.0252297	7.62279e-05	0.0495072	1.19078	0.470586	-0.00170694	0.533386	0.419763	0.39372	-0.000879691	0.467065	0.694008	0.0213574	-0.000235025	0.0396574	0.786201	0.0594222	7.71143e-05	0.0421482	1.80189	0.326051	0.00113406	0.22852	1.87282	0.123552	-0.000149909	0.108995	1.08458	0.0711283	-0.000461798	0.114553	2.23459	0.0147136	7.43082e-05	0.0312015	0.728351	0.0184051	-0.000106194	0.00625191	0.56845	0.0286009	-0.00022691	0.0149591	1.96938
249.36	414	414		419	0.191018	0.0253075	7.93767e-05	0.0495072	0.239042	0.468871	-0.00172272	0.533386	1.12494	0.392845	-0.000870541	0.467065	0.189807	0.0211253	-0.000229133	0.0392725	0.157825	0.0594974	7.31686e-05	0.0421002	1.80859	0.327177	0.00111802	0.228337	0.0655092	0.123403	-0.000148989	0.108175	0.621181	0.0706617	-0.000471408	0.113952	0.0558076	0.0147891	7.66442e-05	0.0308919	0.273806	0.0182991	-0.000105764	0.00615786	0.356158	0.0283722	-0.000230559	0.0148075	1.09695
52.8167	415	415		420	0.0636845	0.0253885	8.26524e-05	0.0495072	0.478172	0.467141	-0.00173714	0.533386	0.842804	0.391979	-0.000861975	0.467065	1.07767	0.0208991	-0.00022334	0.0388914	0.631417	0.0595686	6.93489e-05	0.042053	0.602975	0.328287	0.001102	0.228156	1.41591	0.123254	-0.000148311	0.10736	0.155324	0.0701856	-0.000480677	0.113354	1.00695	0.0148669	7.89284e-05	0.0305854	0.639911	0.0181936	-0.000105293	0.00606522	0.14249	0.0281398	-0.000234265	0.0146574	1.09715
128.825	416	416		421	0.127624	0.0254728	8.60548e-05	0.0495072	0.479129	0.465397	-0.00175021	0.533386	1.1274	0.391121	-0.000853995	0.467065	0.571299	0.0206786	-0.000217644	0.038514	0.316341	0.0596361	6.56552e-05	0.0420065	0	0.329381	0.00108599	0.227976	0.822954	0.123106	-0.000147874	0.106552	0.778175	0.0697005	-0.000489605	0.11276	0.559856	0.014947	8.11609e-05	0.0302819	0.548809	0.0180886	-0.00010478	0.00597397	0.428325	0.0279036	-0.000238027	0.0145088	1.09935
177.457	417	417		422	0	0.0255607	8.95841e-05	0.0495072	0.239714	0.463641	-0.00176192	0.533386	0.845017	0.39027	-0.000846599	0.467065	0.38068	0.0204638	-0.000212047	0.0381403	0	0.0597	6.20876e-05	0.0419608	1.20912	0.330459	0.00107	0.227798	1.05503	0.122958	-0.000147679	0.105749	0.622927	0.0692065	-0.000498191	0.112168	0.111929	0.0150292	8.33416e-05	0.0299815	0.0915251	0.0179841	-0.000104226	0.0058841	0.142864	0.0276637	-0.000241847	0.0143618	0
0	418	418		423	0.639775	0.0256521	9.32402e-05	0.0495072	0.479892	0.461874	-0.00177227	0.533386	0.704863	0.389427	-0.000839788	0.467065	0.954527	0.0202545	-0.000206548	0.0377701	0.633688	0.0597603	5.8646e-05	0.0419159	0.605144	0.331521	0.00105402	0.227622	0.329113	0.122811	-0.000147725	0.104953	0.62353	0.0687042	-0.000506437	0.11158	0.84196	0.0151136	8.54705e-05	0.029684	0.82544	0.0178801	-0.000103631	0.00579558	0.357505	0.0274199	-0.000245723	0.0142162	1.32132
156.231	419	419		424	0	0.0257472	9.70141e-05	0.0495072	0.964967	0.460097	-0.00178143	0.533386	0.141734	0.388591	-0.000833495	0.467065	0.319256	0.0200506	-0.000201154	0.0374036	0.159278	0.0598173	5.53094e-05	0.0418716	0	0.332567	0.00103816	0.227447	0.43039	0.122663	-0.000147988	0.104163	0.313449	0.0681938	-0.000514365	0.110995	0.281606	0.0152001	8.75425e-05	0.0293895	0.276326	0.0177768	-0.000103001	0.00570839	0	0.0271722	-0.000249635	0.0140721	0.22141
0	420	420		425	0.649342	0.0258461	0.000100889	0.0495072	0.487068	0.458311	-0.00178968	0.533386	1.57532	0.38776	-0.000827604	0.467065	0.839241	0.0198521	-0.000195877	0.0370407	1.12715	0.059871	5.20398e-05	0.0418281	0	0.333597	0.00102259	0.227273	0.736145	0.122515	-0.000148422	0.103378	2.37795	0.0676755	-0.00052202	0.110413	0.854551	0.0152887	8.95477e-05	0.0290979	0.371935	0.0176741	-0.000102347	0.00562251	1.45503	0.0269206	-0.000253545	0.0139295	2.23737
82.9924	421	421		426	0.065156	0.025949	0.000104866	0.0495072	0.24461	0.456518	-0.00179704	0.533386	0.143713	0.386935	-0.000822111	0.467065	0.388456	0.0196588	-0.000190719	0.0366812	0.484505	0.0599214	4.88365e-05	0.0417852	1.23382	0.334612	0.00100731	0.227102	1.21166	0.122366	-0.000149025	0.1026	1.4318	0.0671498	-0.000529403	0.109834	0.514539	0.0153792	9.1486e-05	0.0288093	1.96596	0.0175721	-0.00010167	0.00553793	0.729638	0.0266651	-0.000257451	0.0137883	1.12251
52.2122	422	422		427	0	0.0260559	0.000108944	0.0495072	0	0.454717	-0.0018035	0.533386	0	0.386116	-0.000817017	0.467065	0.454241	0.0194706	-0.00018568	0.0363253	2.10458	0.0599687	4.56994e-05	0.0417431	0.617445	0.335612	0.000992341	0.226931	1.55154	0.122217	-0.000149799	0.101827	0.477153	0.0666168	-0.000536513	0.109258	0.400673	0.0154716	9.33575e-05	0.0285234	0.842218	0.0174708	-0.00010097	0.00545462	0.803228	0.0264057	-0.000261354	0.0136486	0.449393
78.9289	423	423		428	0.130481	0.0261669	0.000113114	0.0495072	0.73478	0.452911	-0.00180893	0.533386	0.287798	0.385301	-0.000812362	0.467065	0.584086	0.0192874	-0.000180762	0.0359727	0.161711	0.0600128	4.26286e-05	0.0417016	0.617706	0.336597	0.000977631	0.226762	0.841374	0.122066	-0.000150746	0.10106	0.795593	0.0660769	-0.000543339	0.108684	0.801685	0.0155659	9.51598e-05	0.0282404	1.40554	0.0173702	-0.000100239	0.00537256	0.145971	0.0261424	-0.000265239	0.0135102	1.57579
146.285	424	424		429	0	0.0262821	0.00011732	0.0495072	0.490766	0.4511	-0.00181228	0.533386	0.720835	0.384491	-0.000808078	0.467065	1.0411	0.0191091	-0.000175937	0.0356237	0.486036	0.0600539	3.95913e-05	0.0416608	0.618857	0.337567	0.000962829	0.226595	1.35133	0.121915	-0.000151897	0.100299	0.31883	0.0655303	-0.000549792	0.108114	1.03348	0.015662	9.6925e-05	0.0279602	0.0936898	0.0172703	-9.94521e-05	0.00529173	0.292485	0.0258753	-0.000269045	0.0133733	0.675631
134.778	425	425		430	0.0657791	0.0264016	0.000121545	0.0495072	0.493899	0.449287	-0.00181332	0.533386	0.145087	0.383685	-0.000804043	0.467065	0.458186	0.0189355	-0.000171183	0.035278	0	0.060092	3.65896e-05	0.0416206	0.622808	0.338523	0.000947874	0.226429	0.814484	0.121763	-0.000153239	0.0995442	0.160433	0.0649774	-0.000555857	0.107547	0.750652	0.0157598	9.8671e-05	0.0276828	0.565727	0.0171713	-9.86123e-05	0.00521212	0.073588	0.0256044	-0.000272756	0.0132378	0.679944
19.8799	426	426		431	0.263567	0.0265252	0.000125769	0.0495072	0.494744	0.447474	-0.00181239	0.533386	0.290671	0.382883	-0.000800172	0.467065	1.18115	0.0187667	-0.000166476	0.0349356	0.163325	0.0601271	3.37153e-05	0.0415811	0	0.339463	0.00093304	0.226265	1.15721	0.121609	-0.000154656	0.0987946	1.44797	0.0644187	-0.000561585	0.106983	0.751936	0.0158593	0.000100386	0.0274082	1.03989	0.0170731	-9.7732e-05	0.00513371	0.664163	0.0253298	-0.000276318	0.0131036	0.681108
51.9361	427	427		432	0.0673289	0.0266531	0.00012999	0.0495072	0.758303	0.445663	-0.00180955	0.533386	1.04103	0.382084	-0.000796455	0.467065	1.00553	0.0186026	-0.000161814	0.0345966	0.834438	0.0601595	3.09814e-05	0.0415422	1.91244	0.340389	0.000918365	0.226102	1.04287	0.121453	-0.000156132	0.0980506	0.328425	0.0638544	-0.000566981	0.106422	2.07428	0.0159605	0.000102069	0.0271362	1.54704	0.0169758	-9.68132e-05	0.00505648	0.376609	0.0250518	-0.000279723	0.0129708	0
162.046	428	428		433	0.0675883	0.0267852	0.000134207	0.0495072	0	0.443856	-0.00180478	0.533386	0.745389	0.38129	-0.000792892	0.467065	0.470788	0.0184431	-0.000157197	0.0342609	0	0.0601892	2.83877e-05	0.041504	0	0.3413	0.000903849	0.22594	0.731883	0.121296	-0.000157666	0.0973123	0.659381	0.0632848	-0.000572046	0.105864	0.415269	0.0160634	0.000103719	0.026867	0.581287	0.0168795	-9.58558e-05	0.00498041	0.37806	0.0247704	-0.00028297	0.0128393	0
140.305	429	429		434	0	0.0269215	0.000138415	0.0495072	0.761875	0.442054	-0.0017982	0.533386	0	0.380499	-0.000789425	0.467065	0.47119	0.0182882	-0.00015263	0.0339284	0.167674	0.0602163	2.59207e-05	0.0414663	0.640484	0.342196	0.000889414	0.22578	0.8376	0.121138	-0.00015927	0.0965795	0.329972	0.0627104	-0.000576793	0.105309	0.831246	0.0161679	0.000105333	0.0266005	0.484819	0.0167841	-9.48636e-05	0.00490548	0.22703	0.0244859	-0.000286066	0.0127092	2.80163
224.394	430	430		435	0	0.027062	0.000142612	0.0495072	0.509958	0.44026	-0.00179036	0.533386	0.749024	0.379711	-0.000786078	0.467065	0.473084	0.0181378	-0.000148134	0.0335992	0	0.060241	2.35037e-05	0.0414293	0.643058	0.343079	0.000874626	0.225621	0.665226	0.120978	-0.000160915	0.0958523	1.1612	0.0621313	-0.000581304	0.104756	0.0595283	0.0162741	0.00010689	0.0263365	0	0.0166898	-9.38581e-05	0.00483169	0.0759807	0.0241983	-0.000289041	0.0125804	0.702052
98.7623	431	431		436	0.0680095	0.0272067	0.000146811	0.0495072	1.02129	0.438474	-0.00178149	0.533386	0.300014	0.378926	-0.00078301	0.467065	0.879866	0.0179919	-0.000143721	0.0332731	0.674299	0.0602633	2.11067e-05	0.0413928	1.28785	0.343946	0.000859313	0.225464	1.4414	0.120816	-0.000162555	0.0951305	0.165872	0.0615478	-0.000585609	0.104207	0.417856	0.0163817	0.000108383	0.0260752	0.975824	0.0165964	-9.28476e-05	0.004759	0.22825	0.0239079	-0.000291908	0.0124528	0.234333
141.414	432	432		437	0.137034	0.0273556	0.000151012	0.0495072	0.514458	0.436697	-0.00177158	0.533386	0.302253	0.378145	-0.000780218	0.467065	0.749589	0.0178503	-0.000139389	0.0329502	0	0.0602832	1.87295e-05	0.0413569	0	0.344797	0.000843476	0.225308	1.27417	0.120653	-0.000164188	0.0944141	0.501332	0.0609602	-0.000589708	0.10366	1.08337	0.0164908	0.00010981	0.0258165	0.196425	0.0165041	-9.18322e-05	0.0046874	0	0.0236146	-0.000294667	0.0123266	0.944329
205.054	433	433		438	0.0686546	0.0275087	0.000155217	0.0495072	0.257745	0.434931	-0.00176064	0.533386	1.06152	0.377366	-0.000777705	0.467065	0.272876	0.0177131	-0.000135139	0.0326305	0	0.0603008	1.63723e-05	0.0413217	0.650034	0.345632	0.000827114	0.225153	0.921077	0.120488	-0.000165815	0.0937032	0.502338	0.0603685	-0.000593602	0.103117	0.180522	0.0166013	0.000111173	0.0255604	0.0984096	0.0164128	-9.08119e-05	0.00461689	0	0.0233186	-0.000297318	0.0122017	2.60448
74.9161	434	434		439	0	0.0276661	0.000159423	0.0495072	0	0.433176	-0.00174866	0.533386	1.06358	0.376589	-0.00077547	0.467065	1.09567	0.01758	-0.000130971	0.0323138	1.19523	0.060316	1.40349e-05	0.0412869	1.95388	0.346451	0.000810228	0.225	0.88712	0.120321	-0.000167435	0.0929976	0.50331	0.059773	-0.00059729	0.102576	2.11921	0.0167131	0.000112472	0.0253068	1.18517	0.0163225	-8.97866e-05	0.00454743	0.461722	0.02302	-0.000299861	0.012078	0.474028
206.775	435	435		440	0.0687841	0.0278276	0.000163632	0.0495072	0.258231	0.431434	-0.00173566	0.533386	1.36696	0.375815	-0.000773512	0.467065	0.752509	0.0174511	-0.000126884	0.0320003	0	0.0603289	1.17175e-05	0.0412528	0	0.347253	0.000792816	0.224848	0.638327	0.120153	-0.000169049	0.0922973	0	0.059174	-0.000600773	0.102038	0.482903	0.0168262	0.000113705	0.0250557	0.19719	0.0162332	-8.87563e-05	0.00447902	0.0769498	0.0227189	-0.000302296	0.0119556	0.474004
230.656	436	436		441	0	0.0279933	0.000167844	0.0495072	0	0.429705	-0.00172161	0.533386	0.758954	0.375042	-0.000771832	0.467065	0.136763	0.0173262	-0.000122879	0.0316897	0	0.0603394	9.41994e-06	0.0412191	0	0.348037	0.00077488	0.224697	0.318968	0.119983	-0.000170657	0.0916023	0.33569	0.0585716	-0.00060405	0.101503	0.180952	0.0169405	0.000114874	0.0248071	0.0986442	0.016145	-8.77211e-05	0.00441164	0.307952	0.0224154	-0.000304622	0.0118344	0
140.212	437	437		442	0	0.0281633	0.000172058	0.0495072	0.776659	0.427991	-0.00170654	0.533386	0.760502	0.374271	-0.00077043	0.467065	0.342606	0.0172053	-0.000118956	0.0313822	0.170927	0.0603477	7.1423e-06	0.041186	1.30582	0.348802	0.000756419	0.224548	1.28238	0.119811	-0.000172258	0.0909125	0.336375	0.057966	-0.000607122	0.10097	0.544569	0.0170559	0.000115978	0.024561	0.296536	0.0160578	-8.6681e-05	0.00434527	0.46287	0.0221097	-0.000306841	0.0117145	0.237604
83.2029	438	438		443	0	0.0283375	0.000176275	0.0495072	1.03828	0.426292	-0.00169043	0.533386	1.22155	0.373501	-0.000769306	0.467065	0.550306	0.0170883	-0.000115114	0.0310777	0.342758	0.0603537	4.88456e-06	0.0411535	0.654638	0.349549	0.000737434	0.2244	1.46538	0.119638	-0.000173853	0.0902279	1.01179	0.0573574	-0.000609988	0.100441	0.606609	0.0171724	0.000117017	0.0243173	0.992059	0.0159716	-8.56359e-05	0.0042799	0.309396	0.0218018	-0.000308951	0.0115957	1.42939
0	439	439		444	1.0516	0.0285158	0.000180494	0.0495072	0.26267	0.42461	-0.00167328	0.533386	0.771617	0.372732	-0.000768459	0.467065	0.765444	0.016975	-0.000111354	0.0307761	0.867127	0.0603575	2.64673e-06	0.0411215	0.662454	0.350277	0.000717924	0.224254	1.22877	0.119464	-0.000175441	0.0895485	0.511936	0.056746	-0.000612649	0.0999138	0.737113	0.01729	0.000117991	0.0240761	0.703033	0.0158865	-8.45859e-05	0.00421551	0.86178	0.0214918	-0.000310953	0.0114782	1.44646
114.643	440	440		445	0	0.0286984	0.000184715	0.0495072	0.262782	0.422946	-0.00165511	0.533386	1.23666	0.371964	-0.000767891	0.467065	0.487563	0.0168655	-0.000107676	0.0304774	0.347	0.060359	4.28788e-07	0.0410899	0.662739	0.350985	0.000697889	0.224108	0.830336	0.119287	-0.000177023	0.0888742	0.341437	0.0561322	-0.000615103	0.0993897	0.430065	0.0174084	0.000118901	0.0238372	0.501665	0.0158024	-8.35309e-05	0.00415209	0.705538	0.0211799	-0.000312848	0.0113619	0.723538
77.9701	441	441		446	0.0701382	0.0288853	0.000188939	0.0495072	0.789943	0.421301	-0.00163589	0.533386	0.773511	0.371197	-0.0007676	0.467065	0.907406	0.0167597	-0.00010408	0.0301817	0.695404	0.0603583	-1.76925e-06	0.0410589	2.65632	0.351673	0.000677329	0.223964	1.59584	0.11911	-0.000178599	0.0882049	0.684257	0.0555159	-0.000617353	0.0988684	1.04691	0.0175277	0.000119745	0.0236007	0.704758	0.0157194	-8.2471e-05	0.00408963	0.785431	0.0208661	-0.000314634	0.0112467	0
111.633	442	442		447	0	0.0290763	0.000193165	0.0495072	0.526709	0.419675	-0.00161565	0.533386	0.309451	0.370429	-0.000767587	0.467065	0.488624	0.0166573	-0.000100565	0.0298888	0.521632	0.0603555	-3.94738e-06	0.0410284	0	0.352339	0.000656245	0.223821	0.650992	0.11893	-0.000180169	0.0875407	0.34218	0.0548975	-0.000619397	0.0983499	0.739034	0.0176479	0.000120525	0.0233665	0.201103	0.0156375	-8.14061e-05	0.0040281	0.23543	0.0205507	-0.000316311	0.0111327	0.725113
197.252	443	443		448	0	0.0292716	0.000197394	0.0495072	1.58197	0.41807	-0.00159437	0.533386	0.929436	0.369661	-0.000767851	0.467065	0.768334	0.0165585	-9.71316e-05	0.0295987	0.34816	0.0603505	-6.10562e-06	0.0409984	0	0.352985	0.000634636	0.22368	0.470387	0.118749	-0.000181731	0.0868815	0.342579	0.0542772	-0.000621235	0.097834	0.431503	0.0177688	0.000121241	0.0231347	0.402674	0.0155566	-8.03363e-05	0.00396751	0.157136	0.0202335	-0.000317881	0.0110199	0.483972
243.679	444	444		449	0	0.0294711	0.000201626	0.0495072	1.32668	0.416486	-0.00157205	0.533386	0.779447	0.368893	-0.000768394	0.467065	0.632755	0.0164631	-9.37801e-05	0.0293115	0.175185	0.0603433	-8.24395e-06	0.0409688	0	0.353608	0.000612502	0.22354	0.473374	0.118567	-0.000183288	0.0862273	0	0.0536551	-0.000622867	0.0973209	0.123892	0.0178903	0.000121891	0.0229052	0.202615	0.0154768	-7.92616e-05	0.00390782	0	0.0199149	-0.000319343	0.0109082	0.97409
47.2278	445	445		450	0	0.0296749	0.00020586	0.0495072	0.797735	0.414926	-0.00154871	0.533386	0.624912	0.368124	-0.000769214	0.467065	1.05782	0.0163709	-9.05103e-05	0.0290271	1.23072	0.060334	-1.03624e-05	0.0409398	0	0.35421	0.000589844	0.223401	1.57478	0.118383	-0.000184838	0.085578	0.863757	0.0530315	-0.000624295	0.0968104	0.995154	0.0180125	0.000122477	0.0226779	1.62749	0.0153981	-7.81819e-05	0.00384903	1.03169	0.0195949	-0.000320696	0.0107976	2.1989
111.739	446	446		451	0	0.0298828	0.000210096	0.0495072	0.798245	0.413389	-0.00152432	0.533386	0.156328	0.367355	-0.000770312	0.467065	1.41203	0.016282	-8.73222e-05	0.0287454	0.87839	0.0603226	-1.24609e-05	0.0409111	0.671059	0.354788	0.000566661	0.223263	1.42849	0.118197	-0.000186382	0.0849336	1.21176	0.0524066	-0.000625516	0.0963027	0.870928	0.0181353	0.000122998	0.0224529	2.44534	0.0153205	-7.70972e-05	0.00379112	0.317157	0.0192736	-0.000321942	0.0106882	0.976829
278.417	447	447		452	0	0.030095	0.000214335	0.0495072	0	0.411878	-0.00149891	0.533386	0.939673	0.366584	-0.000771688	0.467065	0.211661	0.0161962	-8.42157e-05	0.0284664	0.175997	0.0603091	-1.45395e-05	0.040883	0	0.355343	0.000542953	0.223126	0.768872	0.11801	-0.000187919	0.084294	0	0.0517806	-0.000626532	0.0957976	0	0.0182585	0.000123454	0.0222302	0.203555	0.0152439	-7.60076e-05	0.00373409	0	0.0189511	-0.000323079	0.0105799	0.244651
69.1392	448	448		453	0.431507	0.0303115	0.000218564	0.0495072	0.269996	0.410392	-0.00147248	0.533386	0.475883	0.365811	-0.000773311	0.467065	0.214385	0.0161136	-8.11847e-05	0.0281902	0.178262	0.0602935	-1.66221e-05	0.0408553	0.680931	0.355874	0.000518768	0.222991	0.333334	0.117821	-0.00018946	0.0836593	1.5804	0.0511536	-0.000627363	0.0952951	0.0630342	0.0183822	0.000123862	0.0220096	0.618523	0.0151684	-7.49191e-05	0.00367792	0.563994	0.0186274	-0.000324116	0.0104726	1.73708
77.795	449	449		454	0.0720656	0.0305322	0.000222766	0.0495072	0.27055	0.408933	-0.00144507	0.533386	0.794767	0.365037	-0.000775135	0.467065	1.21949	0.0160339	-7.82195e-05	0.0279166	1.43081	0.0602758	-1.87447e-05	0.040828	0.682329	0.35638	0.000494175	0.222856	1.2282	0.117631	-0.000191019	0.0830293	0.527295	0.0505259	-0.000628039	0.0947953	1.20264	0.0185062	0.000124247	0.0217912	1.24165	0.0150941	-7.38408e-05	0.00362258	0.565152	0.0183029	-0.000325063	0.0103665	0.993235
104.436	450	450		455	0.0721293	0.030757	0.00022694	0.0495072	1.08316	0.407502	-0.00141668	0.533386	0.318188	0.364261	-0.000777158	0.467065	0.358359	0.0159571	-7.532e-05	0.0276457	0.178787	0.060256	-2.09077e-05	0.0408012	0	0.356862	0.000469177	0.222723	1.11723	0.117439	-0.000192595	0.0824041	0.175921	0.0498976	-0.000628562	0.0942981	1.71262	0.0186306	0.00012461	0.021575	0.828156	0.0150208	-7.27728e-05	0.00356809	0.322769	0.0179774	-0.000325921	0.0102614	0.248528
99.9351	451	451		456	0.0721951	0.030986	0.00023108	0.0495072	1.35518	0.4061	-0.0013874	0.533386	0.477717	0.363483	-0.000779462	0.467065	1.07821	0.0158832	-7.24898e-05	0.0273775	0.894747	0.060234	-2.31243e-05	0.0407748	0.683555	0.357318	0.000443693	0.222591	1.41758	0.117246	-0.000194165	0.0817836	1.05649	0.0492688	-0.000628942	0.0938035	1.07761	0.0187554	0.000124946	0.021361	1.13936	0.0149485	-7.17183e-05	0.00351441	0.242297	0.017651	-0.000326694	0.0101574	1.24377
154.919	452	452		457	0	0.0312192	0.000235165	0.0495072	0.542285	0.404727	-0.00135755	0.533386	1.59461	0.362702	-0.000782334	0.467065	0.574839	0.0158121	-6.97374e-05	0.0271118	0.179019	0.0602097	-2.54423e-05	0.0407489	0	0.357749	0.000417502	0.222461	0.744921	0.117051	-0.000195657	0.0811677	0.3523	0.0486397	-0.000629218	0.0933115	0.126604	0.0188805	0.000125248	0.021149	0.517625	0.0148773	-7.06893e-05	0.00346154	0.403986	0.017324	-0.000327396	0.0100545	0.497704
52.157	453	453		458	0.0724745	0.0314564	0.000239216	0.0495072	0.816256	0.403385	-0.00132744	0.533386	0.639421	0.361918	-0.000786061	0.467065	0.648853	0.0157437	-6.70321e-05	0.0268487	1.61857	0.060183	-2.79092e-05	0.0407233	2.0586	0.358153	0.000390959	0.222331	1.61134	0.116855	-0.000197149	0.0805565	0.530287	0.0480104	-0.000629429	0.0928221	2.48879	0.0190059	0.000125583	0.0209392	1.97797	0.0148071	-6.96976e-05	0.00340946	0.405391	0.0169963	-0.00032804	0.00995255	0.749153
103.072	454	454		459	0	0.0316976	0.000243238	0.0495072	0.273796	0.402073	-0.00129717	0.533386	0.643442	0.361129	-0.000790715	0.467065	0.28987	0.015678	-6.43653e-05	0.0265882	0.542315	0.0601538	-3.05369e-05	0.0406982	0	0.358531	0.000364166	0.222203	0.638911	0.116657	-0.000198666	0.0799499	0.177874	0.0473809	-0.000629585	0.0923352	0.575933	0.0191317	0.000125969	0.0207315	0.627229	0.0147379	-6.8746e-05	0.00335817	0.244764	0.0166679	-0.000328631	0.00985168	0.502576
56.6303	455	455		460	0.0731728	0.0319428	0.000247232	0.0495072	1.37353	0.400791	-0.00126674	0.533386	0.161395	0.360336	-0.000796295	0.467065	0.436252	0.015615	-6.17369e-05	0.0263301	1.08824	0.0601219	-3.3324e-05	0.0406735	0.692812	0.358882	0.000337123	0.222075	1.28508	0.116457	-0.000200207	0.0793479	0.356931	0.0467512	-0.000629686	0.0918509	1.54371	0.0192579	0.000126406	0.0205258	1.99703	0.0146696	-6.78347e-05	0.00330765	0.409297	0.016339	-0.000329167	0.00975183	1.00849
289.643	456	456		461	0	0.032192	0.000251178	0.0495072	0.277187	0.399539	-0.00123637	0.533386	0.325706	0.359536	-0.000802708	0.467065	0.220095	0.0155545	-5.91565e-05	0.0260746	0.366021	0.0600872	-3.61349e-05	0.0406491	0	0.359205	0.000309612	0.221949	0.227889	0.116256	-0.000201711	0.0787504	0.540231	0.0461215	-0.00062976	0.0913691	0	0.0193845	0.000126883	0.0203221	0	0.0146022	-6.69724e-05	0.00325789	0	0.0160096	-0.00032966	0.00965299	1.78335
182.182	457	457		462	0.0742071	0.0324452	0.000255064	0.0495072	0	0.398318	-0.00120624	0.533386	0.49103	0.35873	-0.000809892	0.467065	0.664364	0.0154966	-5.66301e-05	0.0258216	0.183937	0.0600497	-3.88801e-05	0.0406252	0	0.359501	0.000281494	0.221824	1.18758	0.116054	-0.000203138	0.0781574	0.361976	0.0454917	-0.000629825	0.0908899	0.520976	0.0195117	0.000127391	0.0201205	0.319105	0.0145357	-6.61651e-05	0.00320888	0.0830165	0.0156797	-0.000330115	0.00955515	0.767062
58.1468	458	458		463	0.0743683	0.0327021	0.000258889	0.0495072	0.558391	0.397126	-0.00117635	0.533386	0.328065	0.357916	-0.000817847	0.467065	0.813601	0.0154412	-5.41578e-05	0.025571	0.368673	0.0600094	-4.15597e-05	0.0406016	2.81653	0.359768	0.000252768	0.2217	1.38298	0.11585	-0.000204488	0.0775688	0.725526	0.0448619	-0.000629882	0.0904132	0.84867	0.0196393	0.000127931	0.0199209	0.960463	0.0144699	-6.54126e-05	0.0031606	0.666408	0.0153494	-0.000330533	0.0094583	1.53746
291.11	459	459		464	0	0.0329629	0.000262654	0.0495072	0.840812	0.395965	-0.00114668	0.533386	0.164664	0.357094	-0.000826574	0.467065	0.148362	0.0153883	-5.17395e-05	0.0253229	0	0.0599666	-4.41736e-05	0.0405784	0	0.360006	0.000223433	0.221577	0.230424	0.115645	-0.000205762	0.0769847	0	0.044232	-0.00062993	0.089939	0.065433	0.0197675	0.000128504	0.0197232	0.21402	0.0144048	-6.4715e-05	0.00311306	0	0.0150187	-0.000330913	0.00936244	0.77169
190.46	460	460		465	0.074703	0.0332274	0.000266369	0.0495072	0	0.394833	-0.00111745	0.533386	1.15504	0.356263	-0.000835635	0.467065	0.817263	0.0153377	-4.93831e-05	0.0250771	0.370332	0.0599211	-4.67525e-05	0.0405556	0	0.360215	0.000194061	0.221455	0.731684	0.115439	-0.000206929	0.076405	0.546593	0.043602	-0.000629993	0.0894672	0.589933	0.0198963	0.000129098	0.0195275	0.107079	0.0143404	-6.40795e-05	0.00306622	0.334286	0.0146876	-0.000331263	0.00926754	0.514793
176.886	461	461		466	0	0.0334956	0.000270042	0.0495072	0.841605	0.39373	-0.00108884	0.533386	0.659278	0.355423	-0.00084461	0.467065	0.445507	0.0152895	-4.70961e-05	0.0248338	0	0.0598731	-4.93256e-05	0.0405331	0	0.360394	0.000165199	0.221334	1.35117	0.115231	-0.000207959	0.0758297	0.546755	0.042972	-0.000630091	0.088998	0.459118	0.0200257	0.000129704	0.0193338	0.428445	0.0142766	-6.35134e-05	0.00302009	0.334385	0.0143561	-0.000331591	0.00917361	0.772418
86.2005	462	462		467	0	0.0337675	0.000273674	0.0495072	0.564341	0.392655	-0.00106087	0.533386	0.828902	0.354574	-0.000853499	0.467065	0.822271	0.0152435	-4.48786e-05	0.0245928	0.558902	0.0598224	-5.18931e-05	0.040511	0	0.360545	0.000136849	0.221215	1.00836	0.115023	-0.000208852	0.0752587	0.916571	0.0423418	-0.000630225	0.0885312	0.0658766	0.0201558	0.000130323	0.019142	0.430942	0.0142134	-6.30165e-05	0.00297466	0.589425	0.0140244	-0.000331896	0.00908063	1.55384
110.394	463	463		468	0	0.034043	0.000277264	0.0495072	0.564862	0.391608	-0.00103352	0.533386	0.165933	0.353716	-0.000862302	0.467065	0.598771	0.0151997	-4.27306e-05	0.0243542	0.186472	0.0597693	-5.44549e-05	0.0404893	0	0.360668	0.00010901	0.221096	0.698147	0.114813	-0.00020961	0.0746919	0.183483	0.0417115	-0.000630395	0.0880668	0.395624	0.0202864	0.000130953	0.0189521	0.323505	0.0141506	-6.25889e-05	0.00292991	0.336644	0.0136924	-0.000332179	0.00898859	0.518425
310.181	464	464		469	0	0.034322	0.000280814	0.0495072	0.565645	0.390588	-0.0010068	0.533386	0.99698	0.352849	-0.000871019	0.467065	0	0.015158	-4.06519e-05	0.0241178	0	0.0597135	-5.7011e-05	0.0404679	0	0.360763	8.16818e-05	0.220979	0.465818	0.114603	-0.000210231	0.0741295	0.183738	0.041081	-0.0006306	0.0876049	0	0.0204177	0.000131596	0.018764	0.107984	0.0140882	-6.22306e-05	0.00288583	0.168556	0.01336	-0.000332439	0.00889749	0.519144
73.1114	465	465		470	0.452967	0.0346046	0.000284322	0.0495072	1.70054	0.389594	-0.000980706	0.533386	0.666066	0.351974	-0.00087965	0.467065	1.27752	0.0151184	-3.86427e-05	0.0238838	0.935638	0.0596553	-5.95615e-05	0.0404469	2.14438	0.360832	5.48653e-05	0.220862	1.63926	0.114393	-0.000210715	0.0735713	0.552384	0.0404503	-0.000630842	0.0871454	0.861521	0.0205496	0.000132251	0.0185779	2.16969	0.0140261	-6.19415e-05	0.00284242	0.929869	0.0130275	-0.000332677	0.00880731	0
48.7865	466	466		471	0.075682	0.0348906	0.000287788	0.0495072	0.568255	0.388626	-0.000955243	0.533386	0.50079	0.35109	-0.000888194	0.467065	0.752772	0.0150807	-3.6703e-05	0.023652	0.375185	0.0595944	-6.21063e-05	0.0404262	0	0.360873	2.85601e-05	0.220746	0.937103	0.114182	-0.000211063	0.0730173	0.738342	0.0398193	-0.000631119	0.0866884	1.66298	0.0206822	0.000132918	0.0183935	0.97743	0.0139643	-6.17217e-05	0.00279966	0.593513	0.0126947	-0.000332892	0.00871804	0.521539
106.081	467	467		472	0.075856	0.0351801	0.000291214	0.0495072	0	0.387683	-0.000930407	0.533386	0.167314	0.350198	-0.000896652	0.467065	1.35976	0.015045	-3.48327e-05	0.0234225	0.376048	0.059531	-6.46454e-05	0.0404058	2.15465	0.360889	2.76608e-06	0.220632	1.0571	0.113971	-0.000211275	0.0724675	0.37002	0.039188	-0.000631431	0.0862337	0.398915	0.0208154	0.000133597	0.0182111	0.870944	0.0139026	-6.15712e-05	0.00275754	0.169723	0.0123617	-0.000333085	0.00862968	1.30685
285.865	468	468		473	0.0758602	0.0354731	0.000294598	0.0495072	0	0.386765	-0.000906199	0.533386	0.501969	0.349297	-0.000905024	0.467065	0.452274	0.015011	-3.30319e-05	0.0231952	0	0.0594651	-6.71788e-05	0.0403857	0	0.360879	-2.25166e-05	0.220518	0.703994	0.11376	-0.00021135	0.0719218	0	0.0385564	-0.00063178	0.0857814	0.332448	0.0209494	0.000134288	0.0180304	0.217476	0.0138411	-6.14899e-05	0.00271605	0.254598	0.0120285	-0.000333256	0.00854221	1.04553
131.373	469	469		474	0	0.0357693	0.00029794	0.0495072	1.14413	0.385871	-0.00088262	0.533386	1.34608	0.348388	-0.00091331	0.467065	0.227119	0.0149789	-3.13004e-05	0.0229701	0.377701	0.0593967	-6.97066e-05	0.040366	0.721376	0.360844	-4.72881e-05	0.220406	0.746245	0.113548	-0.000211289	0.0713802	0.185823	0.0379245	-0.000632164	0.0853315	0.333892	0.021084	0.000134991	0.0178515	0.218421	0.0137796	-6.1478e-05	0.00267519	0.0852345	0.0116952	-0.000333403	0.00845563	0
218.53	470	470		475	0.0766616	0.0360689	0.000301242	0.0495072	1.15122	0.385	-0.000859669	0.533386	0.507272	0.34747	-0.00092151	0.467065	0.228526	0.0149484	-2.96385e-05	0.0227472	0.190021	0.0593257	-7.22287e-05	0.0403466	0	0.360785	-7.15483e-05	0.220294	0.276449	0.113337	-0.000211092	0.0708427	0.560924	0.0372921	-0.000632584	0.0848839	0	0.0212194	0.000135707	0.0176744	0.109887	0.0137181	-6.15353e-05	0.00263495	0	0.0113617	-0.000333529	0.00836993	0.792434
124.204	471	471		476	0.0766659	0.0363718	0.00030449	0.0495072	1.15128	0.384151	-0.000837473	0.533386	0.5073	0.346545	-0.000929526	0.467065	0.686378	0.0149196	-2.80509e-05	0.0225265	0.190031	0.0592522	-7.47648e-05	0.0403275	0	0.360701	-9.5115e-05	0.220184	0.870013	0.113126	-0.000210795	0.0703092	0.37397	0.0366593	-0.000633052	0.0844387	0.538238	0.0213554	0.000136428	0.017499	0.329679	0.0136565	-6.16664e-05	0.00259531	0.0857672	0.0110282	-0.000333635	0.0082851	0.264159
145.983	472	472		477	0	0.0366779	0.000307661	0.0495072	1.16205	0.383324	-0.000816283	0.533386	0	0.345611	-0.000937168	0.467065	0.692797	0.0148923	-2.65474e-05	0.0223079	0.191808	0.0591762	-7.73534e-05	0.0403087	0	0.360595	-0.000117629	0.220074	1.03818	0.112915	-0.000210474	0.0697798	0.566201	0.036026	-0.000633593	0.0839958	0.339121	0.0214922	0.00013714	0.0173254	0	0.0135948	-6.18802e-05	0.00255626	0.0865693	0.0106945	-0.000333731	0.00820112	0.26663
266.765	473	473		478	0.0774088	0.0369871	0.000310755	0.0495072	0.58122	0.382518	-0.000796106	0.533386	1.36762	0.34467	-0.00094443	0.467065	0.384589	0.0148665	-2.51283e-05	0.0220914	0.191873	0.0590975	-7.99957e-05	0.0402902	0	0.360466	-0.00013908	0.219965	0.438426	0.112705	-0.000210129	0.0692543	0.566391	0.0353921	-0.000634206	0.0835552	0.0678469	0.0216297	0.000137842	0.0171535	0.110958	0.0135327	-6.2177e-05	0.00251781	0.0865983	0.0103607	-0.000333815	0.008118	0.266719
273.236	474	474		479	0.0774867	0.0372994	0.000313771	0.0495072	0.290902	0.381732	-0.000776942	0.533386	1.02546	0.343723	-0.000951313	0.467065	0.616731	0.014842	-2.37937e-05	0.021877	0	0.0590162	-8.26917e-05	0.040272	0	0.360317	-0.00015947	0.219858	0.558848	0.112495	-0.000209762	0.0687328	0.188987	0.0347575	-0.000634892	0.083117	0.0679151	0.0217679	0.000138536	0.0169833	0.111069	0.0134704	-6.25568e-05	0.00247993	0.0866855	0.0100268	-0.000333887	0.00803572	0
0	475	475		480	0.546573	0.0376146	0.00031671	0.0495072	0.878157	0.380964	-0.000758792	0.533386	0.343956	0.342768	-0.000957815	0.467065	0.620582	0.0148188	-2.25434e-05	0.0216647	0.579795	0.0589321	-8.54413e-05	0.0402541	0.738238	0.360148	-0.000178796	0.219751	1.2077	0.112286	-0.000209371	0.0682153	1.52324	0.0341223	-0.000635652	0.082681	1.30118	0.0219068	0.000139221	0.0168148	1.00699	0.0134076	-6.30196e-05	0.00244262	0.960367	0.00969293	-0.000333949	0.00795427	0.53731
117.436	476	476		481	0.156095	0.0379328	0.000319572	0.0495072	1.46504	0.380214	-0.000741654	0.533386	1.3789	0.341807	-0.000963939	0.467065	0.932179	0.0147969	-2.13774e-05	0.0214545	0.193455	0.0588453	-8.82445e-05	0.0402365	0	0.35996	-0.000197061	0.219645	1.12779	0.112077	-0.000208957	0.0677016	0.380709	0.0334862	-0.000636484	0.0822474	0.47953	0.0220463	0.000139896	0.016648	0.111873	0.0133443	-6.35654e-05	0.00240587	0.0873128	0.00935895	-0.000333999	0.00787365	0
47.8661	477	477		482	0.0782368	0.0382537	0.000322337	0.0495072	0.881156	0.379481	-0.00072539	0.533386	0.34513	0.34084	-0.000969753	0.467065	0.855923	0.0147761	-2.02737e-05	0.0212463	0.193925	0.0587556	-9.1017e-05	0.0402191	0.740759	0.359754	-0.000214446	0.21954	1.25207	0.111868	-0.000208542	0.0671918	0.57245	0.0328493	-0.000637334	0.081816	1.03065	0.0221866	0.000140552	0.0164828	2.36065	0.0132805	-6.41401e-05	0.00236968	0.876122	0.00902493	-0.000334043	0.00779385	0.269572
65.514	478	478		483	0	0.0385774	0.000324986	0.0495072	2.06048	0.378763	-0.000709866	0.533386	0.690767	0.339868	-0.000975327	0.467065	0.466786	0.0147563	-1.92106e-05	0.0210401	1.36041	0.0586633	-9.36776e-05	0.0402021	0	0.359531	-0.000231129	0.219436	1.45598	0.111659	-0.000208148	0.0666858	0.954783	0.0322115	-0.00063815	0.0813869	1.16865	0.0223274	0.000141176	0.0163193	1.12339	0.013216	-6.46916e-05	0.00233403	1.228	0.00869087	-0.000334086	0.00771485	1.34885
111.386	479	479		484	0.0784694	0.0389037	0.00032752	0.0495072	1.17837	0.378061	-0.000695081	0.533386	0.519234	0.33889	-0.000980661	0.467065	0.780496	0.0147376	-1.81881e-05	0.0208359	0.972507	0.0585683	-9.62261e-05	0.0401853	0.742961	0.359292	-0.000247109	0.219333	0.930846	0.111451	-0.000207775	0.0661837	0.382767	0.031573	-0.000638932	0.08096	0.343882	0.0224689	0.000141769	0.0161574	0.674869	0.0131511	-6.52198e-05	0.00229892	0.351139	0.00835676	-0.000334126	0.00763666	1.08149
140.799	480	480		485	0	0.0392324	0.000329939	0.0495072	0.885128	0.377373	-0.000681036	0.533386	0.693372	0.337906	-0.000985756	0.467065	0.468546	0.0147199	-1.72063e-05	0.0206337	0.194799	0.0584709	-9.86626e-05	0.0401688	0	0.359037	-0.000262387	0.219231	1.01353	0.111244	-0.000207423	0.0656853	0.383353	0.0309337	-0.000639679	0.0805354	0.344409	0.022611	0.000142331	0.0159971	0.337951	0.0130856	-6.57248e-05	0.00226433	0.0879193	0.00802261	-0.000334164	0.00755926	0.812363
62.3682	481	481		486	0.0789859	0.0395635	0.000332242	0.0495072	1.77918	0.376698	-0.000667731	0.533386	0.696869	0.336918	-0.00099061	0.467065	0.785633	0.0147032	-1.62652e-05	0.0204335	1.56821	0.058371	-0.000100987	0.0401525	1.4957	0.358767	-0.000276962	0.21913	1.55092	0.111037	-0.000207092	0.0651907	0.963217	0.0302937	-0.000640391	0.0801129	1.94465	0.0227535	0.000142861	0.0158384	2.15568	0.0130196	-6.62066e-05	0.00223027	0.441813	0.00768843	-0.000334201	0.00748264	0.81646
51.7146	482	482		487	0	0.0398968	0.00033443	0.0495072	0	0.376037	-0.000655166	0.533386	0.69966	0.335925	-0.000995224	0.467065	0.157598	0.0146874	-1.53648e-05	0.0202352	0.786264	0.0582689	-0.000103199	0.0401365	0	0.358483	-0.000290835	0.21903	1.10513	0.11083	-0.000206781	0.0646998	0.967075	0.0296529	-0.000641069	0.0796928	1.2539	0.0228967	0.000143361	0.0156812	1.48001	0.0129532	-6.66652e-05	0.00219672	0.0887166	0.00735421	-0.000334236	0.0074068	0.81973
301.239	483	483		488	0	0.0402323	0.000336503	0.0495072	0	0.375388	-0.00064334	0.533386	0	0.334928	-0.000999597	0.467065	0.0790752	0.0146725	-1.4505e-05	0.0200388	0.197254	0.0581647	-0.0001053	0.0401208	0	0.358186	-0.000304006	0.21893	0.16375	0.110623	-0.000206491	0.0642126	0.388185	0.0290115	-0.000641713	0.0792748	0.1395	0.0230403	0.000143829	0.0155256	0.11407	0.0128863	-6.71005e-05	0.00216367	0.0890273	0.00701996	-0.000334269	0.00733173	0.548401
175.986	484	484		489	0	0.0405698	0.00033846	0.0495072	1.20039	0.37475	-0.000632255	0.533386	0.528937	0.333926	-0.00100373	0.467065	0.397143	0.0146584	-1.36859e-05	0.0198444	0	0.0580584	-0.000107288	0.0401053	0	0.357876	-0.000316474	0.218832	0.90712	0.110417	-0.000206222	0.063729	0.19496	0.0283695	-0.000642322	0.078859	0.210185	0.0231843	0.000144266	0.0153716	0.22916	0.012819	-6.75126e-05	0.00213112	0	0.00668567	-0.0003343	0.00725742	0.275426
58.1468	485	485		490	0.160102	0.0409092	0.000340302	0.0495072	0.90159	0.374123	-0.000621908	0.533386	0.529701	0.33292	-0.00100762	0.467065	0.956111	0.0146451	-1.29075e-05	0.0196518	0.595267	0.0579501	-0.000109164	0.0400901	0.757938	0.357553	-0.00032824	0.218734	1.48866	0.110211	-0.000205973	0.0632491	0.780966	0.0277269	-0.000642897	0.0784454	0.70233	0.0233288	0.000144672	0.0152191	1.26335	0.0127513	-6.79014e-05	0.00209906	0.447772	0.00635136	-0.00033433	0.00718386	1.10329
138.881	486	486		491	0.0801182	0.0412504	0.000342029	0.0495072	0.300782	0.373506	-0.000612302	0.533386	0.530145	0.331911	-0.00101128	0.467065	0.15922	0.0146325	-1.21697e-05	0.0194611	0	0.0578401	-0.000110929	0.0400751	0	0.357219	-0.000339303	0.218637	1.07487	0.110005	-0.000205746	0.0627729	0.39081	0.0270837	-0.000643437	0.0780339	0.702919	0.0234736	0.000145047	0.0150681	0.114842	0.0126832	-6.82671e-05	0.00206748	0.179259	0.00601702	-0.000334357	0.00711105	0.55211
66.1904	487	487		492	0.0801182	0.0415932	0.00034364	0.0495072	0.300782	0.372898	-0.000603435	0.533386	1.06029	0.330898	-0.00101469	0.467065	0.23883	0.0146207	-1.14726e-05	0.0192723	0.595766	0.0577283	-0.000112581	0.0400603	0	0.356875	-0.000349664	0.218541	1.19934	0.109799	-0.000205539	0.0623002	0.586216	0.02644	-0.000643943	0.0776246	1.05543	0.0236189	0.000145391	0.0149186	1.84091	0.0126148	-6.86095e-05	0.00203638	0.179259	0.00568265	-0.000334383	0.00703897	1.93514
133.479	488	488		493	0	0.0419376	0.000345135	0.0495072	1.20546	0.372299	-0.000595308	0.533386	0.177058	0.329882	-0.00101787	0.467065	0.478587	0.0146096	-1.08162e-05	0.0190852	0	0.0576149	-0.000114121	0.0400458	0.760045	0.35652	-0.000359322	0.218446	0.744952	0.109594	-0.000205353	0.061831	0.195784	0.0257958	-0.000644414	0.0772175	0.704282	0.0237644	0.000145704	0.0147706	0.115064	0.012546	-6.89287e-05	0.00200574	0.0898034	0.00534825	-0.000334407	0.00696763	1.65954
175.221	489	489		494	0	0.0422834	0.000346516	0.0495072	0.905775	0.371707	-0.000587921	0.533386	0.886933	0.328862	-0.0010208	0.467065	0.560187	0.0145991	-1.02004e-05	0.0189	0.199343	0.0575001	-0.000115549	0.0400315	0.761456	0.356156	-0.000368278	0.218352	0.455496	0.109388	-0.000205187	0.0613654	0.196148	0.0251512	-0.000644851	0.0768125	0.0704885	0.0239103	0.000145985	0.014624	0.115278	0.0124769	-6.92246e-05	0.00197557	0.0899701	0.00501383	-0.000334429	0.00689701	0.554208
55.037	490	490		495	0.0804204	0.0426306	0.000347781	0.0495072	0	0.371123	-0.000581274	0.533386	0	0.32784	-0.00102349	0.467065	0.479462	0.0145892	-9.62531e-06	0.0187166	0.199338	0.0573839	-0.000116866	0.0400175	0	0.355784	-0.000376532	0.218258	1.66266	0.109183	-0.000205043	0.0609034	0.980711	0.0245062	-0.000645254	0.0764096	1.90948	0.0240564	0.000146236	0.0144789	2.19483	0.0124076	-6.94973e-05	0.00194585	0.539805	0.00467939	-0.000334449	0.0068271	0.277096
157.97	491	491		496	0	0.042979	0.000348931	0.0495072	0.605625	0.370544	-0.000575366	0.533386	1.78086	0.326815	-0.00102595	0.467065	0.963372	0.0145798	-9.09088e-06	0.018535	0	0.0572664	-0.00011807	0.0400036	0	0.355404	-0.000384083	0.218165	0.373849	0.108978	-0.000204919	0.0604447	0.786897	0.0238607	-0.000645622	0.0760088	0.282783	0.0242027	0.000146455	0.0143353	0.462467	0.0123379	-6.97468e-05	0.00191657	0.360938	0.00434494	-0.000334467	0.00675791	0.277919
54.1226	492	492		497	0	0.0433284	0.000349965	0.0495072	0.60796	0.369972	-0.000570198	0.533386	0.714375	0.325788	-0.00102816	0.467065	0.885826	0.014571	-8.59712e-06	0.0183551	1.80831	0.0571478	-0.000119162	0.03999	0.766639	0.355016	-0.000390932	0.218073	1.58988	0.108773	-0.000204816	0.0599896	0.987414	0.0232149	-0.000645955	0.0756101	0.710393	0.0243493	0.000146643	0.0141931	1.74442	0.0122681	-6.99731e-05	0.00188774	0.725566	0.00401046	-0.000334484	0.00668941	0.27899
184.882	493	493		498	0	0.0436789	0.000350884	0.0495072	0.607978	0.369404	-0.000565769	0.533386	0.357198	0.324759	-0.00103013	0.467065	0.0804588	0.0145626	-8.14402e-06	0.018177	0	0.0570281	-0.000120142	0.0399767	0.766661	0.354622	-0.000397078	0.217982	0.876815	0.108569	-0.000204734	0.0595378	1.18493	0.0225688	-0.000646254	0.0752136	0.425822	0.024496	0.0001468	0.0140522	0.116066	0.012198	-7.01761e-05	0.00185934	0.18117	0.00367597	-0.000334499	0.00662161	0.557997
23.9653	494	494		499	0.406752	0.0440302	0.000351688	0.0495072	0.916222	0.36884	-0.000562081	0.533386	0.71773	0.323728	-0.00103186	0.467065	0.809151	0.0145547	-7.73159e-06	0.0180006	1.20985	0.0569075	-0.00012101	0.0399635	0	0.354222	-0.000402522	0.217892	1.3019	0.108364	-0.000204673	0.0590895	0.793641	0.0219224	-0.000646519	0.0748191	0.571125	0.0246429	0.000146926	0.0139128	0.934027	0.0121277	-7.03559e-05	0.00183137	0.546047	0.00334146	-0.000334512	0.0065545	0.2803
150.948	495	495		500	0	0.0443822	0.000352376	0.0495072	0	0.368279	-0.000559132	0.533386	0	0.322696	-0.00103336	0.467065	0.406054	0.0145471	-7.35983e-06	0.0178259	0.202582	0.0567861	-0.000121766	0.0399505	0	0.353817	-0.000407263	0.217803	0.88501	0.108159	-0.000204632	0.0586446	1.796	0.0212758	-0.000646749	0.0744266	0.0716337	0.0247898	0.00014702	0.0137748	0.234302	0.0120573	-7.05125e-05	0.00180382	0.0914318	0.00300695	-0.000334523	0.00648806	0.844818
94.8816	496	496		501	0	0.0447349	0.000352949	0.0495072	0.307283	0.367721	-0.000556923	0.533386	0.180535	0.321662	-0.00103461	0.467065	1.54854	0.0145399	-7.02874e-06	0.017653	0.202881	0.056664	-0.00012241	0.0399378	0.774969	0.353408	-0.000411302	0.217714	1.35242	0.107955	-0.000204612	0.058203	1.19777	0.0206289	-0.000646945	0.0740363	0.286958	0.0249369	0.000147084	0.0136381	1.52756	0.0119867	-7.06459e-05	0.00177668	0.0915668	0.00267242	-0.000334532	0.0064223	0
109.539	497	497		502	0.0818475	0.0450881	0.000353406	0.0495072	0.307274	0.367165	-0.000555453	0.533386	0	0.320626	-0.00103562	0.467065	0.65144	0.0145331	-6.73831e-06	0.0174817	0.40575	0.0565413	-0.000122942	0.0399252	0.774946	0.352995	-0.000414639	0.217626	1.43743	0.10775	-0.000204613	0.0577647	0.798492	0.0199819	-0.000647106	0.073648	0.574616	0.025084	0.000147116	0.0135028	0.939736	0.011916	-7.0756e-05	0.00174995	0.366256	0.00233788	-0.000334539	0.00635721	0.564027
79.2325	498	498		503	0.0818379	0.0454416	0.000353748	0.0495072	1.84343	0.36661	-0.000554723	0.533386	0.361016	0.31959	-0.00103639	0.467065	0.977451	0.0145265	-6.48855e-06	0.017312	1.01425	0.0564182	-0.000123362	0.0399129	0.774855	0.352579	-0.000417273	0.217539	1.5644	0.107545	-0.000204635	0.0573297	1.59879	0.0193347	-0.000647233	0.0732617	0.789735	0.0252311	0.000147117	0.0133688	0.586533	0.0118452	-7.08429e-05	0.00172363	0.457766	0.00200334	-0.000334545	0.00629278	0.28198
101.623	499	499		504	0	0.0457955	0.000353975	0.0495072	0.921985	0.366056	-0.000554733	0.533386	0.361122	0.318554	-0.00103693	0.467065	0.162686	0.0145201	-6.27946e-06	0.017144	0.202911	0.0562947	-0.00012367	0.0399007	0	0.35216	-0.000419205	0.217453	0.971092	0.107341	-0.000204678	0.056898	0.399317	0.0186875	-0.000647325	0.0728774	0.21525	0.0253782	0.000147087	0.0132362	0.469365	0.0117743	-7.09065e-05	0.0016977	0.549482	0.00166879	-0.000334549	0.006229	0.282063
286.431	500	500		505	0	0.0461496	0.000354087	0.0495072	0.614711	0.365501	-0.000555472	0.533386	0.722309	0.317517	-0.00103722	0.467065	0.24405	0.0145139	-6.11119e-06	0.0169776	0	0.0561709	-0.000123866	0.0398888	0	0.351741	-0.000420438	0.217367	0.337343	0.107136	-0.000204741	0.0564696	0.199676	0.0180401	-0.000647383	0.0724952	0.0717564	0.0255253	0.000147027	0.0131049	0.117352	0.0117034	-7.09471e-05	0.00167216	0	0.00133424	-0.00033455	0.00616586	0.282088
99.8597	501	501		506	0	0.0465037	0.000354141	0.0495072	0.921904	0.364945	-0.000556253	0.533386	0	0.316479	-0.00103738	0.467065	0.570162	0.0145078	-5.99274e-06	0.0168129	0	0.056047	-0.000123986	0.039877	0.775015	0.35132	-0.00042119	0.217282	0.674988	0.106931	-0.000204795	0.0560443	0.998203	0.0173927	-0.000647418	0.0721149	0.0717437	0.0256723	0.000146971	0.0129749	0.469323	0.0116324	-7.09718e-05	0.001647	0.366289	0.000999693	-0.000334551	0.00610337	0.282038
69.233	502	502		507	0.0821386	0.0468578	0.00035417	0.0495072	1.8502	0.364388	-0.000556671	0.533386	0.724685	0.315442	-0.00103746	0.467065	0.735374	0.0145019	-5.92948e-06	0.0166497	0.814385	0.0559229	-0.00012405	0.0398654	0	0.350898	-0.000421592	0.217198	0.932118	0.106726	-0.000204824	0.0556223	1.202	0.0167453	-0.000647437	0.0717367	1.37074	0.0258192	0.000146942	0.0128461	1.29629	0.0115615	-7.0985e-05	0.00162222	0.827926	0.000665141	-0.000334552	0.00604151	0.566032
82.0621		503		508	0.164658	0.047212	0.000354174		1.23632	0.363831	-0.000556724		0	0.314404	-0.00103748		0.900691	0.014496	-5.9214e-06		0.408136	0.0557989	-0.000124058		0.779504	0.350477	-0.000421644		1.27521	0.106522	-0.000204828		1.00398	0.0160978	-0.000647439		0.867354	0.0259662	0.000146938		1.29929	0.0114905	-7.09867e-05		0.276308	0.000330589	-0.000334552		1.13469
304.761				509	0				1.54816				0.72766				0.0819527				0				0.780895				0.212136				0.402311				0.144576				0				0.184534				0.284178
144.864				510	0				0.310566				0.54739				0.57622				0				0				0.639604				0.403523				0.36253				0.237155				0.648741				0.285035
269.179				511	0				0.62582				0.735362				0.0828201				0				0				0.300563				0				0				0				0				0
64.6382				512	0.250227				0.939408				0.367946				0.33152				0.826981				0				0.816955				1.22059				0.804896				0.957664				0.373243				0.287393
62.7167				513	0.0840539				0.946672				0.556187				0.919563				0.833376				0.795837				1.38884				1.02502				1.55078				1.08555				0.470162				0.579231
52.9809				514	0				0.316392				0.557659				0.921996				0.41779				0.797942				1.30537				0.205546				2.0749				0.604009				0.471406				0.580764
141.168				515	0				0.316671				0.744201				0.335262				0.209079				0.798646				0.738961				0.411456				0.295725				0.120908				0.283093				0.581276
124.403				516	0.0845204				0.951925				0.186425				0.840682				0				0				1.13393				0.824567				0.3704				0.363455				0				0.582446
0				517	1.78051				0				0.746267				1.17836				0.62898				0				0.915932				0.412598				0.593834				0.971165				0.378505				0.58289
127.915				518	0				0.319481				0.750804				0.930997				0				0				0.526196				0.415106				0.298349				0.609905				0.190403				1.17287
44.8064				519	0.255737				2.88348				0.376048				1.10286				0.422595				0				2.02816				0.415821				0.448294				1.71312				0.572193				0.293722
145.045				520	0.170796				0.641206				0.37672				0.424281				0.211675				0				1.45542				0.208282				0.374246				0.244819				0.0955359				0
123.208				521	0.0856856				0.321683				0.37799				0.425711				0				0.811286				1.14957				0.835936				0.150203				0.245644				0.575147				1.18095
80.8261				522	0				0.654679				0.384636				0.607341				1.29674				0				0.944167				1.27595				0.229266				1.0011				0.390173				0.600859
75.8088				523	0.177375				0				0.391232				0.705881				0.879317				0.839709				1.28154				0.432611				1.32378				1.01827				0.595297				2.14213
144.196				524	0				0.332942				0.19561				0.176244				0.219822				2.51905				0.50229				0.216299				0.38865				0.508483				0.198426				0
22.4986				525	0				1.33476				0				1.14993				0.220316				0				1.10057				0.650352				1.24881				0.509625				0.596614				0.306258
146.616				526	0.177876				0.667786				0				0.265121				0.66135				0				0.779149				1.7375				0.546443				0.764903				0.198993				0.306444
258.002				527	0.0893537				0.670908				0.394171				0.0887869				0				0				0.137896				0				0.391582				0.12808				0				0
62.3682				528	0				0.335562				0				0.889043				0.443104				0.846289				1.52332				0.654001				0.705857				0.898128				0.700955				0
167.387				529	0.0898956				0.674976				0.396561				0.267976				0				0				0.880489				0.219252				0.7887				0.257713				0.100568				0.619487
72.8385				530	0				0.338025				0.397192				1.43416				0				0.852501				1.02177				0.219601				1.02749				0.904721				0.100728				0.620473
52.4874				531	0.0913562				1.37189				0.403005				0.363107				0.226444				0				1.46203				1.11407				0.240214				0.91796				0.920836				2.52136
63.3609				532	0				0				0.403723				0.637479				0.453696				0				1.41756				1.11606				0.401071				0.787102				0.307151				0.315338
56.5776				533	0.09151				0.343549				0				0.819275				0.680476				0				1.03847				0.223189				2.334				2.23384				0.409495				0.945919
271.037				534	0				1.38003				1.01349				0.365262				0				0				1.1379				0.224136				0				0.263454				0				0.316644
93.3574				535	0.276944				1.03971				0.407232				0.918207				0.457639				0				0.665789				0				1.29701				1.05991				0.619642				0.318079
83.5811				536	0.185228				1.39077				0.204276				1.10616				0.688683				0				0.572662				0.225881				1.30121				1.32885				0.207217				0.638219
129.764				537	0.187324				0				0				1.39881				0.464319				0.886809				1.01423				0.913753				0.492555				0.537022				0.209562				0.968165
147.668				538	0.281691				0.35251				0.207106				0.466506				0.232742				0.889032				0.677201				0.916043				0.49379				0.134592				0				0
92.57				539	0.0942962				0				0				1.69031				0.467463				0.892812				1.36259				1.14992				1.07608				1.08267				0.105491				1.29963
106.698				540	0				0.71238				0.837073				0.471376				0				0.898313				1.22359				1.15701				0.249472				0.271994				0.212281				0.326908
77.1803				541	0				0.356923				0				0.756699				0.471311				0.900161				0.83289				0.231878				1.08494				0.272554				0.319077				0.327581
83.0345				542	0.28557				0.714729				0.839833				1.23151				1.17973				0.901274				1.3755				1.16082				0.751719				0.818672				0.425962				0.327986
98.2299				543	0				0.35996				0.422967				0.763138				0.712982				0				0.64219				1.16925				0.504226				0.687182				0.107264				0.991105
113.982				544	0.0959079				1.44024				0.634626				0.763349				0.713179				0				0.741535				0.233916				1.26344				0.687373				0.643762				0
121.939				545	0				0.720543				0.211666				0.859154				0.475732				0				1.13838				0.468107				0.336442				1.10182				0.644141				0.330654
48.7865				546	0				0.721368				0				0.860137				0.714415				0				1.7372				1.40593				1.01216				0.137713				0.429918				0.662065
0				547	1.16121				0				0.213083				0.672916				0.718374				2.74406				0.996413				0.706858				0.678232				0.692379				0.865682				0.665734
164.261				548	0				0				0.854624				0.192504				0				1.8343				0.748947				0.472507				0.254703				0				0.108366				0.333763
91.3414				549	0				0.729611				0.642991				0.289667				0.722579				0				1.00225				0.710997				0.597034				1.25497				0.762042				0.334816
320.595				550	0.194365				0.364844				0.214353				0.0965658				0.240885				0				0.0499926				0.474048				0.0851779				0.139301				0.108719				0.334851
298.543				551	0				1.0958				1.28761				0.193355				0.482328				0.921204				0.150151				0				0.0852765				0.139463				0				0.670477
159.095				552	0.0978996				0.367537				0.43187				0.681923				0				0.92693				0.857658				0.238773				0.429033				0.140329				0				0.337322
60.0496				553	0				0.736062				0.43245				0.194819				0.242989				0				0.960174				0.717283				0.171844				1.26607				0.329007				1.01333
0				554	0.789895				1.11065				0.21751				1.07885				0.244433				0				0.406338				1.44309				0.432162				0.565412				0.330962				0.339783
149.402				555	0.296474				0.37101				0.43595				0.884761				0.244956				0.935688				0.71274				0				0.607187				0.283311				0.110557				0
290.591				556	0.0989692				0.743105				0.218294				0.393366				0				0				0.560539				0				0.173488				0.283725				0.110718				0.341008
158.605				557	0				0.378141				0.88866				0.300256				0				0				0.622812				0.491325				0				0.433135				0.225363				0
224.687				558	0				0.757852				0.890505				0.501465				0				0.955653				0.884235				0.492345				0.176931				0				0				0
51.5482				559	0.101373				0.380575				0.670785				0.604377				1.25636				0				1.36002				0				0.978244				0.290615				0.453628				1.04787
55.3044				560	0				0.384541				0.225925				0.610675				0.25389				0				0.738735				0.74946				1.07911				0.440465				0.343766				1.41171
64.8822				561	0.205055				0				0.452285				0.203754				0.254134				0				0.686704				0.25006				0.449314				0.440889				0.229398				0.353268
149.074				562	0				0				0.22827				0.308507				0				2.93964				0.586155				0.252413				0.272125				0.593382				0.115778				0.356592
134.841				563	0				0				0.229745				0.414001				0				0				0.966629				0.254044				0.365178				0.597218				0.233053				0.358896
50.1496				564	0.104815				0.786996				0.693562				0.624899				0.259804				0				1.4062				0.255639				1.38077				1.8059				0.939235				0
68.4798				565	0.104819				0.393513				0				0.730118				0.259813				0.992441				1.24342				0.766946				1.10429				0.150247				0.703573				0
122.508				566	0.105037				0.394333				0.231678				0.417483				0.260355				0.99451				0.866154				0.768544				0.460312				0.752802				0.117507				0.723831
69.7948				567	0				0.397861				0				1.1594				0				0				0.983481				0				0.185772				1.52059				0.237116				0.730306
39.6143				568	0.106991				0.803339				0.707965				1.38419				0.795596				2.02602				0.827229				0.521895				1.6917				0.766807				0.239386				0
135.881				569	0				0.403351				0				0.748371				0.532617				1.01725				0.830692				0				0.188336				0.46201				1.20314				1.11058
60.3549				570	0				1.21623				0				0.214605				0.267668				0				0.667723				1.05351				0.758133				0.773947				0.604036				0.372081
75.0951				571	0.108072				1.21718				0.476742				0.752777				0.80363				1.02324				0.779432				0.527165				0.0947221				1.24083				0.241803				0
149.968				572	0				0				0.239464				0.431513				0				1.02793				0.447351				0				0.285469				0.46686				0.242911				0.374078
116.475				573	0				0.409187				0.240405				0.975805				1.08065				1.03197				0.898781				0				0.191061				0.781159				0.365799				0
30.5934				574	0				0.411615				0.241831				0.326835				0.815295				0				0.677944				0.802226				0.288291				0.942953				0.490626				1.13333
0				575	0.778027				0.416675				0.489608				0.773092				1.10042				0				0.400233				0.812088				0.291835				0.318181				0.744985				1.14726
77.5758				576	0.111354				0.418047				0				0.886286				0.552024				0				1.2058				0.543175				0.585593				0.798074				0.124573				1.15104
145.136				577	0				0.418905				0.492229				0.332624				0				0				0.517177				0.54429				0.685573				0				0				1.1534
115.959				578	0				0.419716				0				0.333268				0.277114				0				0.633201				0				0.195977				0.480756				0.125071				0.770424
153.249				579	0				0.420956				0				0.222835				0.277932				0				0.75101				0.273477				0				0.32145				0				0.772699
63.6077				580	0				0.848778				0.498673				0.787406				0.280199				0				0.698984				0.827123				0.198159				0.324072				0.379389				0.779002
117.471				581	0				0				0.249316				0.112317				0				0				1.34087				0				0.396286				0.486069				0.126453				1.16841
64.6382				582	0				0				0.499692				1.01413				0				1.0725				0.875806				0				0.49641				0.649469				0.506886				1.17089
225.686				583	0				0				0.502031				0.226165				0				0				0.410388				0				0				0.163127				0.254629				0
153.66				584	0				0.866266				0				0.229281				0.285972				0				0.594092				0.281388				0.202242				0.496124				0.258137				0
0				585	0.583515				1.31439				0.257409				0.579814				0.289271				2.20993				0.120069				0				0.613724				0.334565				0.391672				0.402111
130.119				586	0				0.88906				0.26117				0.824775				0.293497				0				0.548813				0.288792				0.103782				0				0.26493				1.22396
92.2143				587	0				0				0				0.480794				0.299837				0				0.622895				0.295031				0.424094				1.38887				0.676631				0.416799
191.115				588	0				0.461811				0.271323				0.244461				0				0				0.316397				0				0.107816				0.176324				0.137614				0.423846
58.9739				589	0				0.475767				0				0.503698				0.628242				0				1.11021				0				0.333223				0.726611				0				0
187.958				590	0				0				0.570281				0.385367				0				0				0.133004				0.630597				0				0				0				0
62.2684				591	0.261775				0.98276				0.288695				0.260114				0				0				0.943982				0.638458				0.344158				0.187614				0.146426				0
256.188				592	0.134619				0.505388				0.296925				0.133765				0.333678				0				0.693198				0				0.23598				0.192962				0				0
24.3662				593	0				0.508599				0				0.807687				0.671596				0				0.278762				0.330415				0.118739				0				0.45467				0
0				594	1.14221				0.969526				1.02183				0.627694				1.40241				1.53691				1.16961				1.13251				1.47877				1.06818				0.8036				1.49499
103.064				595	0				0.78278				0.363335				0.863751				0.808198				0.258515				1.19093				0.930739				0.926659				1.18616				0.294481				1.92128
0				596	0.787421				0.649745				0.939605				0.838217				1.11844				0.286107				0.625736				0.420716				1.13582				0.754451				1.38909				3.65056
142.019				597	0.698594				2.34618				0.871783				0.864721				0.725583				0.619248				0.49152				2.08194				0.355993				0.64451				0.794345				0.820655
0				598	1.00022				2.62323				1.55195				1.00852				1.64134				0.314743				1.48837				0.411458				1.69533				1.61982				1.21256				0.333689
0				599	1.29627				0.74331				0.23001				1.63407				0.681891				0.654614				1.89491				1.12446				1.00534				1.95919				0.979818				0.694018
67.5215				600	0.163178				1.75849				0.388123				0.948176				0.690382				0.331382				3.01487				0.270418				1.61411				2.12264				0.471739				0.35133
154.352				601	0.119592				0.773273				0.159521				0.718062				0.354246				1.362				1.07273				0.835244				0.304592				0.235789				0.0484235				0.902493
0				602	1.14863				1.87614				0.66337				1.30256				1.75085				0				0.801455				0.982663				1.40358				1.32647				1.00811				1.3138
0				603	0.870487				0.849456				1.49214				0.865633				0.876554				0				0.42994				1.28503				0.621469				0.310823				0.905897				0.396563
209.589				604	0.0262829				1.13295				1.22878				0.0507262				0				1.12248				0.340805				0				0				0				0				0
0				605	1.70049				1.13645				2.82386				1.38275				1.76101				1.87659				1.04663				1.72063				1.73137				0.989696				1.33811				2.19049
0				606	2.17643				1.19148				1.38536				1.36861				1.64057				0.78698				2.58488				0.707062				2.93294				2.6311				1.34694				1.67079
0				607	0.652524				1.21977				1.89194				1.09745				1.36415				2.01415				0.334937				1.18603				0.514563				0.558461				1.09076				0.640619
150.75				608	0.0284215				0.612569				0.28433				0.301969				0.21047				0.404605				1.29099				0.462899				0.413567				0.112072				0.17262				1.71799
96.7548				609	0.0298074				2.57298				0.397594				1.27225				1.32661				0.424336				1.54218				0.277017				1.13984				0.765169				0.362076				1.57683
151.893				610	0.0298106				0.642509				0.696856				0.115069				0				0				0.58921				0.0692615				0				0				0				0
0				611	0.838738				1.2871				1.09627				0.86759				0.885564				0.850139				1.68235				0.833874				1.03278				1.47588				0.726612				0.675985
0				612	0.900108				0.96646				1.19824				1.21767				1.10798				2.55341				1.20374				1.18282				0.924838				0.944798				1.21345				0.225593
97.002				613	0.0300431				0				0.400738				0.84366				0.444957				1.28307				0.969518				0.209406				1.03915				0.830452				0.0608231				0.680155
386.701				614	0.06036				0				0.402564				0.0873716				0.335238				0				0.0678819				0.63178				0				0.119007				0				0
318.877				615	0.0305597				1.97596				1.53166				0.0884707				0.226304				0.87009				0.413618				0.213006				0				0				0.123738				0.691849
88.1087				616	0				0.999681				0.103114				0.778213				0.917079				0				1.10375				0.215528				0.562293				1.03824				1.19193				0.933389
122.269				617	0				0.336521				0.416532				0.725335				0				0.889096				0.634769				0.581149				0.62458				0.554727				0.252881				0.471308
160.503				618	0.0945238				0.339546				0.105069				0.395877				0				0.448544				0.998894				0.14641				0				0				0.0637887				0.475545
121.406				619	0.0318795				0.34355				0.851527				0.277182				0.118039				0				0.919787				0.815493				0.17374				0.0628539				0.193623				0.481152
294.935				620	0.577124				1.72378				0.533406				0.92955				0.236906				0				0.396837				1.11715				0.407397				0.252298				0.843271				1.2071
201.108				621	0.256618				0.690501				0.320503				0.185497				0.237246				0.912159				0.942715				0.670659				0.2328				0.25266				0.0648603				1.20883
73.7889				622	0				1.73214				0.321597				0.0310216				0				0.457636				0.126715				0.074689				0.0583986				0				0				0
328.07				623	0				1.06056				0.546966				0.09497				0				0				0.129309				0				0				0				0.0664139				0
210.074				624	0.0659195				1.42077				0.770472				0.318381				0.366115				0.469212				0.483354				0.536814				0.419729				0.129968				0				1.49237
447.111				625	0				0.35884				0.444158				0.032133				0				0.474032				0.0936195				0				0.0604908				0				0				0
199.789				626	0				1.08459				1.23171				0.518953				0				0				0.739101				0.233834				0				0				0.135837				0
97.002				627	0.0336467				0				0.448805				0.455219				0.124582				0.957984				0.645923				0.312698				0.550726				0.465032				0.61375				0.253913
282.13				628	0				0.364155				0.338052				0.0326089				0				0				0.171201				0.0785107				0.0613868				0				0				0
328.932				629	0.0338283				0.729104				0				0.0326445				0				0				0.114132				0.0785963				0				0.0666963				0				0
162.341				630	0				1.13125				0.466737				0.609148				0.12956				0.49813				1.14926				0.325191				0.31783				0.0689888				0.212521				0
362.045				631	0				0				0.468776				0.033914				0				0				0.158291				0.163306				0				0.0692902				0				0
422.454				632	0				0.762937				0.118042				0				0.131067				0.503924				0.159436				0				0				0				0.0716644				0
264.311				633	0.0357464				0.770444				1.31243				0				0				0.508883				0.0603015				0.0830528				0.0649381				0				0				0
305.056				634	0				1.15769				1.91416				0				0				0				0.100678				0.0831979				0.0650516				0				0				0
87.8467				635	0.03634				1.95809				0.727095				0.879161				0.269109				0.517333				0.986566				0.845163				0.925551				0.573903				0.147143				1.09695
351.646				636	0				0				0.607033				0				0				0				0.184453				0				0				0				0				0
166.166				637	0				1.59914				0.247419				0.0715991				0.412081				1.05624				0.648966				0.0861925				0				0				0				0
116.596				638	0				1.2057				0.497457				0.252283				0.552349				0				0.800455				0.346595				0.610425				0.147059				0.755785				0.281437
411.468				639	0.225589				0				0.125378				0				0.556853				0.535246				0.105709				0.349421				0.0683023				0.0741292				0				0.283732
216.012				640	0				0.81254				0.88127				0.0363802				0				0				0.2122				0				0				0				0				0
0				641	1.32514				2.43762				0.628581				0.912052				0.697941				0				0.659493				1.31649				0.823205				0.893433				1.37688				1.42248
167.251				642	0				0.409682				0.63386				0.146743				0				0				0.514539				0.176653				0.138123				0				0				0.286886
58.9233				643	0				0.820683				0.761856				0.0367448				0				0				0.171504				0.265405				0.0691726				0				0				0
346.75				644	0				0				0.639636				0.11106				0				0				0.172788				0				0				0.0756361				0.0776661				0
410.107				645	0.11595				0.833022				0.25777				0.0745945				0.286214				1.65065				0.152349				0.448993				0.210638				0				0				0
322.325				646	0				0.417877				0				0				0.143576				0.55202				0.0654131				0				0.0704428				0				0				1.75575
249.335				647	0				1.68675				0.260973				0				0				0				0.154242				0.272743				0				0				0				0
223.772				648	0				0				0.261819				0.0757661				0				0				0.176816				0.0912089				0				0				0.158953				0
0				649	0.673239				1.27807				0.263657				0.803038				0.585501				0.562782				0.781366				1.01126				0.503431				0.858151				0.801147				0.596659
0				650	0.675821				0				0.66167				0.575579				0.734683				1.69482				0.716748				0.830736				0.505362				0.46945				0.723878				0.89842
152.462				651	0				0				0.264949				0.230016				0.147092				0				0.717508				0.553796				0.144336				0				0				0
230.96				652	0.040597				0				0.541513				0.156705				0.300633				0				0.526414				0				0				0				0				0.306362
254.907				653	0				2.62481				0				0				0				0				0.182841				0.188634				0				0				0				0.306344
275.976				654	0				0.438418				0.813983				0.0785178				0.150634				0				0.206114				0				0				0.160421				0.0823631				1.22803
296.674				655	0.328186				1.32461				0.546515				0.118615				0				0.583274				0.438661				0.762503				0.0744312				0.0807809				0				0.309192
0				656	0.945263				0				0.546775				0.713607				0.758886				0.583551				0.485199				1.62192				0.297866				0.728181				1.49711				0.928017
0				657	0.863583				0.884221				0.820839				1.51114				0.911415				0.584033				1.04364				0.763495				1.49429				1.45918				0.831399				0.928783
153.975				658	0.0820608				0.442165				0.547294				0.75388				0.607685				0				1.16051				0.285988				0.67158				0				0.166134				1.54816
0				659	1.2809				0.887409				0.686499				1.19634				0.45735				2.93069				1.0474				1.34117				0.899056				0.73141				1.75465				0
258.95				660	0				0.446191				0.414208				0.039955				0				0				0.116409				0.0961975				0.0752159				0				0				0
346.75				661	0				0.44716				0.553476				0				0				1.77211				0.186892				0				0				0				0.0840055				0.313131
99.21				662	0				0.896436				0.277393				0.482441				0.154001				0				1.05805				0.579807				0.756331				0.49202				0.0842042				0.941614
302.747				663	0				0.897262				1.11198				0				0.154143				0.592647				0.0702273				0				0				0				0				0
35.2477				664	0.167166				0.900734				0.278723				1.66155				1.3942				1.18988				1.87433				0.680656				1.44551				1.1552				0.931534				0
202.423				665	0				0				0.421712				0				0				1.2002				0.332324				0				0				0				0				0.954338
107.996				666	0				0				0.562939				0.448398				0				0.600803				0.977728				0.588328				0.460008				0.166417				0.170883				1.27394
312.837				667	0				1.36645				0.140944				0.081574				0				0				0.333208				0.294602				0				0				0.171138				0
379.507				668	0				0.459864				0.426901				0				0				0				0.095981				0				0				0				0				0
167.431				669	0.0853895				0				1.28279				0.123602				0				0				0.40885				0.29759				0.0775608				0				0.0864367				0
112.571				670	0.0428005				0.461241				0.142726				0.41344				0				0				0.773035				0.298327				0.700554				0.168772				0.173302				0.968973
362.769				671	0				1.84843				0.428983				0.0827605				0				0				0.241364				0				0				0.0845445				0				0
81.6864				672	0				0.462227				0				0.788084				0.158814				0.610607				1.50668				0.597928				0.624132				0				0.347344				0.971044
36.9697				673	0				0.925192				0				0.580765				1.11418				0				1.55689				0.299203				0.467888				1.18657				0.434527				2.27082
422.454				674	0				0.925372				0.286347				0				0				0				0.0724274				0.199507				0				0.0846504				0.0869223				0.648006
418.161				675	0				0				0.575479				0				0				0.614186				0.194322				0				0				0				0.087345				0
205.857				676	0				0.466862				0.866794				0				0.160407				0				0.341533				0				0.0787005				0				0				0
126.107				677	0				0				0.579733				0.209707				0.160926				0				0.514446				0.10098				0.236866				0				0				0.327986
41.9128				678	0.130476				1.40607				0				1.17893				1.12886				0.619146				1.18073				0.910446				0.63286				0.601101				0.617234				0.984624
279.203				679	0				0.469822				0.87229				0.33699				0.322848				0.620641				0.565312				0.101292				0.0791995				0				0				0.329
165.804				680	0				0				0.439413				0.0847727				0				0				1.14231				0.204103				0.398965				0.1732				0				0.662931
297.253				681	0				0.473563				0.732695				0.127218				0.325418				1.25116				0.04942				0.510493				0.07983				0				0				0.663239
216.172				682	0.0444561				0				0.592988				0				0				0				0.6267				0.103289				0				0				0				0
375.122				683	0.0448069				0				0				0.172956				0				0.637868				0.151172				0				0				0				0				0
395.873				684	0				1.45078				0.748216				0				0.166156				0.638833				0.151401				0				0				0				0				0
199.623				685	0				0.483474				0.448818				0.0865871				0.166114				1.27735				0.75959				0.416942				0.326003				0.0884536				0				0.67712
385.524				686	0.224627				0.484141				0.599249				0.26012				0				0				0.252872				0.521896				0.0816131				0.531453				0.545717				0.339027
95.7621				687	0				1.93788				0.74957				0.434261				0.166456				0				1.22047				0.2089				0.245006				0				0.182029				0.339257
56.5758				688	0.0450906				0.48592				0.150363				0.915941				0.667819				1.28381				1.45511				0.419052				1.31307				1.15749				0.182574				1.02082
132.357				689	0.0452487				0				0.15089				0.349758				0				0				0.61243				0.315391				0.164401				0.178426				0.183215				0.682932
136.834				690	0.0452982				0				1.51206				0.350141				0				0.644862				1.10088				0.210491				0				0				0				0.68368
499.858				691	0.136345				1.46933				0.151556				0				0				0				0.153336				0				0.0825632				0				0				0
258.352				692	0				0.490079				0.45495				0				0.168384				0				0.20483				0.211319				0				0				0				0
232.511				693	0				0				1.37145				0.0440484				0				0				0.282593				0.106053				0				0				0.0924111				0
211.847				694	0				0.491993				0.761211				0.308836				0				0				0.591989				0				0.0829369				0				0				1.72263
90.7027				695	0				0.492979				0.152547				0.70764				0				0				1.18969				0.106285				1.082				0				0				0.690432
317.296				696	0				0				0.152642				0.0883443				0				0.651635				0.102956				0				0				0				0.0926708				0.34543
367.409				697	0				0				0.15279				0				0				0.652266				0.20637				0				0				0				0				0
164.896				698	0.184263				0.49643				0.30723				0.0444538				0				0.65579				0.832011				0				0.0836848				0				0				0
399.149				699	0				0				0.465224				0.0448761				0				1.98606				0.209456				0				0				0				0				0
379.946				700	0.140127				0				0				0.135223				0.345895				1.32989				0.0262649				1.19484				0				0.0920921				0.189127				0.704973
193.634				701	0.0467497				0.5038				0.467687				0				0				0				0.0262877				0				0.0849271				0				0				0
393.498				702	0				1.51204				0.93577				0				0.173171				0				0.105195				0.217327				0				0				0				0
224.086				703	0.14057				1.0099				1.56408				0				0				0				0.396008				0				0				0				0				0
259.995				704	0				1.52453				0.786248				0				0				0.671305				0.185877				0				0.0856647				0				0				0.355857
400.94				705	0.0944729				0.509045				0.157519				0				0				1.34491				0.159369				0				0				0				0				0
283.59				706	0				0.520148				0.482864				0				0.178715				0				0.0542816				0				0				0				0				0
324.911				707	0				0.522152				0.161575				0				0				1.37954				0.108981				0.112574				0				0				0				0
150.177				708	0.0484941				0.522598				0				0.046797				0				2.07107				0.519195				0				0				0				0				0
228.158				709	0				0.524698				0.487087				0				0.180278				0				0.0273782				0				0				0				0				0
300.58				710	0				0.525406				0.162582				0.0470485				0				0				0.164491				0.113276				0				0				0				0
58.2581				711	0				0				0				0.474471				1.82051				0.699248				0.970836				0.684729				0.714737				0.581057				0.397768				0.74134
339.847				712	0.0492172				1.06078				0.656495				0.0474948				0				0				0.138376				0				0.0894096				0				0				0
253.255				713	0				0				0.328883				0.0951734				0				0				0.110915				0				0				0				0				0
117.7				714	0.14793				0				0.164433				0.571964				0.730311				0				0.918609				0.687397				0				0.778733				0.299488				0.744228
390.39				715	0				1.06331				0.65806				0.047608				0				0				0.194466				0.114623				0				0.0972684				0				0
424.457				716	0				0				0.494552				0.0477051				0.183041				0.703754				0.278256				0				0				0				0.100083				0
129.878				717	0.0495658				1.06829				0.330573				0.0478312				0				0				0.446776				0				0				0				0				0
122.914				718	0.100315				0				1.67427				0.532909				0				0				0.934399				0.349606				0.273354				0.0988913				0				0
292.469				719	0				1.08151				0.334663				0.145269				0				0				0.226011				0				0				0				0.101589				0.378673
74.9471				720	0				0				0.16767				0.485696				1.30506				2.14737				0.794195				0.93574				1.00567				0.694929				0.203589				0
127.791				721	0				2.16773				0				0.0485285				0				0.7159				0.908274				0.116839				0.182711				0				0				0
389.208				722	0.0503469				0				0				0				0.186417				0				0.283388				0.116975				0				0.0992646				0				0
286.507				723	0				1.09202				0				0				0				0				0.313677				0.117718				0				0.0998948				0				0.382352
112.119				724	0.0507766				0				0.677296				0.588976				0.188008				0				1.2917				0.235948				0.0922425				0.100112				0.205597				0.383182
360.308				725	0				0.547545				0.338865				0				0				0				0.085711				0				0				0				0				0
356.407				726	0				0				0.678962				0.0491202				0				0				0.229265				0				0				0				0				0
358.718				727	0				0				0.515774				0.0497523				0				0				0.0579813				0.119786				0				0				0				0
145.352				728	0.0516624				0.556741				0.86139				0.249272				0.191288				0				0.582456				0				0				0.101858				0				0
408.748				729	0				1.11447				0.344861				0.0498986				0				0.736112				0.0872277				0				0				0				0.209369				0
180.685				730	0				0				0.69035				0				0				0				0.408016				0				0.0940203				0				0				0
342.291				731	0				1.11592				1.72828				0				0.191707				0				0.0873413				0				0				0				0				0
458.991				732	0.0519555				0				1.21452				0				0				1.47927				0.17529				0				0				0				0				0
150.368				733	0				0.563421				0.523034				0.151358				0.193583				0.744285				0.530353				0.607359				0.379911				0.10308				0.105847				1.18363
374.393				734	0				1.13059				0.524774				0				0				0				0.147482				0				0.0952936				0				0.212398				0
275.389				735	0.10586				0.570399				0.353008				0				0				0				0.2384				0				0.096154				0				0				0
422.762				736	0				1.14657				0.886986				0.102672				0				0				0.0897403				0.123599				0.0966406				0				0				0
410.258				737	0				1.14906				0.711131				0				0				0				0.240127				0				0				0				0.107934				0
48.8078				738	0.0535185				2.30698				0.356935				0.827879				1.58727				0.761885				1.27026				0.373033				1.55849				1.16175				0.10835				1.21162
238.37				739	0				0				1.0715				0				0				0				0.0602267				0				0				0				0				0
381.851				740	0				0.577288				0.178636				0				0				0				0.150611				0				0				0				0				0
220.302				741	0				0				0.179677				0.207983				0				0				0.637771				0				0				0				0				0
132.357				742	0.161793				0.581189				0				0.208175				0.599064				0.767758				0.608033				0.250605				0.293919				0				0.327555				1.22096
167.791				743	0.0540058				0				0.360185				0.312695				0				0				0.303983				0.376429				0.196217				0.106478				0.328009				0.407551
162.158				744	0.162362				1.16646				0.541425				0				0				0				0.304628				0				0				0				0				0
297.977				745	0				0				0.361847				0				0				0				0.061016				0				0				0				0				0
312.549				746	0				1.17205				0.362678				0				0				0.774145				0.122313				0				0				0				0				0
395.873				747	0				1.17211				0				0				0				0				0.152899				0				0				0				0				0
51.3495				748	0				0				0.182137				0.897608				1.82213				0				0.955469				0.634504				1.19265				2.15913				0.331732				0.824354
342.434				749	0				1.1845				1.28469				0				0				0				0.0927086				0				0				0				0				0
79.756				750	0				1.77684				0.183275				0.583936				0.610496				0.782409				1.24206				0.510776				0.899582				0.10836				0.445074				0.414754
114.147				751	0				1.19564				0.554968				0.321197				0				0				0.437334				0.128888				0.100776				0				0.112309				1.2559
274.213				752	0				1.19604				0.740205				0.0535508				0				0				0.0624081				0				0				0				0.112347				0.418773
224.558				753	0				1.79587				0.74095				0.0536047				0				0				0.312667				0.129061				0.100912				0				0				0
164.715				754	0				0				0.186394				0				0				0				0.377795				0.129867				0				0				0				0
375.852				755	0				0				0.373156				0.107985				0				0				0.0943845				0.129995				0				0				0				0
298.7				756	0.0560864				0				0.187031				0.0541237				0				0				0.0315379				0.130311				0				0				0				0
0				757	0.449582				0				0.187168				0.814076				0.623463				0.799028				0.696236				0.652031				0				0.221324				0				0.423563
316.289				758	0.0562532				1.21243				0.750346				0				0				0				0.0316316				0				0				0				0				0
62.8285				759	0				1.82143				0.375748				0.707867				0.834419				0				0.921889				0.523592				0.614087				0.333238				0.228121				0.850321
123.556				760	0				0.610204				0.188821				0.163926				0				0				0.638388				0.131558				0.102864				0.111639				0.573178				0
44.274				761	0				0				0.189578				0.549156				0.210497				0				1.31705				0.925917				0.51638				0.112087				0.23019				0.429016
74.9471				762	0.0570493				0				0.190242				0.385921				0				0				0.836628				0.132548				0.726501				0				0				1.29156
99.9395				763	0.0573043				0				0				0.608842				0				0				0.581297				0				0.208202				0				0.116014				0.432443
274.36				764	0				0				0.191368				0				0.212484				0				0.0322692				0				0				0				0				0
387.88				765	0				0				0.957642				0				0.212663				0				0.0968888				0				0				0				0				0
319.883				766	0				0				0				0				0				0				0.0645925				0				0				0				0				0
337.692				767	0				0.620153				0.1919				0.0555328				0				0				0.226836				0				0.104541				0				0.116505				0
378.775				768	0.0576535				1.24261				0				0				0				0.82075				0.162095				0				0				0				0				0
219.352				769	0				1.24257				0				0.166903				0				0				0.487244				0.401843				0				0				0				0.87013
290.581				770	0				0				0				0				0				0				0				0				0				0				0				0.436357
376.29				771	0				0.625533				0.38713				0				0				0				0.097919				0				0				0				0				0
253.104				772	0				0				0				0.0560162				0.21493				0				0.0979219				0				0.105451				0				0				0.876104
269.643				773	0				1.25694				0.194474				0				0				0				0.163965				0				0				0				0.118067				0
410.863				774	0				0.631398				0				0				0				0				0.0988371				0.136128				0				0				0				0
167.791				775	0.0586766				1.89699				0.587004				0.0566232				0				0				0.164972				0				0				0				0				0.442799
269.348				776	0.0586749				1.26462				0.195662				0				0				0				0.0989801				0				0				0.115684				0				0.442786
73.4977				777	0.058668				0.632237				0				0.39687				0				0				1.39249				0.272617				0.639469				0.231341				0.118775				0
367.409				778	0				0				0.782788				0				0.217291				0				0.0329992				0				0				0				0				0.442864
300.002				779	0.117381				0.63248				0.195714				0.0566366				0				1.67103				0.0990064				0				0				0				0				0
118.359				780	0				0				0.782719				0.226506				0.651816				0				0.926866				0				0.426401				0.115694				0				0
225.812				781	0.0588835				0				0.392716				0				0				0.838261				0.331438				0				0				0.116095				0				0
91.9832				782	0				3.18015				0.393626				0.570115				0				0				0.865527				0.822757				0.428871				0.349093				0.119487				0
347.181				783	0				0				0.197164				0				0				0				0.233059				0				0				0				0.119701				0
391.721				784	0				0				0.593276				0				0				0				0.233761				0				0				0				0				0
428.947				785	0.0597511				0				0				0				0				0				0.235526				0				0				0				0				0
349.917				786	0				0				0.996975				0				0				0				0				0				0				0				0				0
267.869				787	0				0				0				0				0				0				0.475037				0.139999				0				0				0				0.454722
384.347				788	0				0.651075				0				0				0				0.860077				0.13589				0				0				0				0				0
277.004				789	0				0				0.604939				0				0				0				0.0340024				0				0.109851				0				0				0
254.607				790	0				1.30592				0.202052				0.116941				0				0				0.238836				0				0				0				0				0
475.991				791	0				0.653459				0.202206				0.0585152				0.224519				0				0.0681936				0.140884				0				0.119553				0				0
224.244				792	0				0				1.01718				0				0				0				0.343384				0				0				0				0				0
352.079				793	0				0				0.815143				0.0589723				0				0				0.103089				0				0				0				0				0
451.632				794	0.0612201				0				0				0.0590777				0				0.871524				0				0				0.111214				0				0				0.461993
304.768				795	0				1.32393				0.409675				0				0				0				0.207243				0				0				0				0				0
405.436				796	0				0				0.625318				0				0				0				0.0351479				0.145227				0				0				0				0
385.818				797	0				0.685155				1.48622				0				0				0.905097				0.0357506				0				0				0				0				0
202.751				798	0				0				0				0				0				0				0.250604				0				0.115495				0				0				0
428.326				799	0				0				0.637449				0				0				0				0.0716595				0				0				0				0				1.44255
43.4944				800	0.0637579				0.687089				0				0.615882				0.472147				0.907652				1.36845				0.888806				0.579124				0.881198				0.258159				0
470.187				801	0				0				0.640819				0				0				0.911895				0				0				0				0				0				0
392.461				802	0.128153				0				0				0				0				0				0.180154				0				0				0				0				0
159.394				803	0				0				0.214902				0.435946				0				0				0.689964				0.149729				0				0				0				0.97265
395.873				804	0				0.695592				0.645732				0.124576				0				0				0.0725905				0				0				0				0				0
150.368				805	0				1.41154				0.436787				0.126399				0				0				0.553501				0				0				0				0				0
390.242				806	0				0.707029				0.656349				0				0				0				0.0737841				0				0				0				0.132826				0
273.477				807	0				0				0				0.126612				0				0				0.0737768				0				0				0				0				0
320.17				808	0.0658801				0.709959				0.21969				0				0				0				0.111135				0				0				0				0				0.994319
333.957				809	0.132357				0.713175				0.441369				0.127725				0				0				0.186064				0.153758				0.120222				0				0				0
69.9479				810	0				0				0.2214				0.128139				0				0.945165				0.710826				0.154257				0.241224				0.261803				0				0
156.043				811	0.134289				0				0.671718				0.0647948				0.248613				0				0.491582				0				0				0.132383				0				0
222.513				812	0				0				0.224467				0.129914				0				0				0.0378506				0				0				0				0				0
450.336				813	0				0				0				0				0				0				0.228069				0				0				0				0				0
394.833				814	0				0.732972				0.226811				0				0				0				0.0764914				0				0				0				0				0
236.064				815	0				0				0				0.0657704				0				0				0.114973				0				0				0				0				0
0				816	0.272959				0				0.910233				0.263407				0				0.971456				0.307358				0.475642				0				0				0				0.514967
363.783				817	0				1.48146				0				0.0663301				0				0.978513				0.193253				0				0				0				0				0
324.767				818	0.137509				0				0.229275				0				0				0				0.0773224				0				0				0				0				0
411.014				819	0				0.741371				0				0				0				0				0.116052				0.159837				0				0				0				0
161.607				820	0				0				0				0.265854				0				0				0.426398				0				0				0				0				0
280.375				821	0				0				0.461889				0.200495				0				0				0.468093				0				0				0				0				0
350.782				822	0				0				0.231566				0				0				0				0.195238				0				0.2523				0				0				0
289.564				823	0.0696608				0.750701				0.464594				0.134446				0				0				0.117512				0				0				0				0				0
232.975				824	0				0				0				0				0				0				0				0				0				0				0				0
81.1377				825	0				0.75165				0				0.269232				0.258255				0				0.746754				0.162053				0.380124				0.137518				0.282417				0
405.285				826	0				0.756322				0.936144				0				0				0				0.0394641				0				0				0				0				0
307.364				827	0				0				0				0				0				0				0				0				0				0				0				0
378.044				828	0				0.761838				0.235743				0				0.261756				0				0.0397519				0				0				0				0				0.533488
376.874				829	0				0				0.236247				0				0				0				0.119511				0				0				0				0				0
76.6648				830	0				1.52917				0.236593				0.342331				0				1.01003				0.359456				0.329685				0.515554				0.279768				0				0
502.646				831	0.0722072				0				0.240788				0.0696803				0				0				0.0812054				0				0				0				0				0
175.621				832	0				0.779758				0				0				0				0				0.0813739				0				0				0.14266				0				0
182.414				833	0				0				0.242338				0				0.538158				1.03455				0.20432				0				0.132018				0				0				0.548414
99.4535				834	0.293717				0				0.244864				0.638445				0.271883				2.09067				0.206449				0.853023				0.666971				0.289548				0.297319				0.554129
393.795				835	0				0.792074				0				0				0				0				0.0413296				0				0				0				0				0
82.233				836	0				1.59905				0.247405				0.28638				0				0				0.584892				0.172375				0.404336				0.292553				0				0
254.457				837	0				0				0.249004				0.0720578				0				0				0.167952				0.17349				0				0				0				1.127
408.145				838	0				0				0				0.0725101				0				0				0.169006				0				0				0				0				0
269.495				839	0				0				0.250577				0				0				1.06972				0.0845064				0				0				0				0				0
249.788				840	0				0				0				0				0.278806				0				0.0423413				0				0.136791				0				0				0.568239
309.237				841	0				0				0				0				0				0				0.0854401				0				0				0				0				0
267.277				842	0				0				0				0				0				0				0.129387				0				0				0				0				0
261.486				843	0				0				0				0				0				0				0.129929				0				0				0				0				0
454.888				844	0				0				0.516303				0				0.286638				0				0.217653				0				0				0				0				0
182.587				845	0				0				0				0				0				0				0.217823				0				0				0				0				0
[truncated: 839 more columns]

## Sheet: Fig. 3C
	Fig. 3C: Decline parameters for 220 declined genes as fitted by the mathematical model.
	Gene Names	m0	µ	γ	tonset	Half-life	Plateau
	AAK1__chr2	2.47304	0.0205542	0.0222164	100	31.1998	0.92518
	ABL2__chr1	6.33819	0.0882072	0.0336587	0	20.5934	2.62063
	ANLN__chr7	12.2945	3.28833e-14	0.0101955	90	67.9855	3.22527e-12
	ARHGAP11A__chr15	5.42083	0.0023996	0.0161906	60	42.8117	0.14821
	ARL4A__chr7	1.20162	0.00209148	0.00916288	10	75.6473	0.228256
	ARL6IP1__chr16	33.153	2.55407e-14	0.00756659	90	91.6063	3.37546e-12
	ASF1B__chr19	4.76932	1.26897e-08	0.00528754	0	131.091	2.39993e-06
	ASPM__chr1	18.6339	2.78138e-14	0.0110584	60	62.6805	2.51517e-12
	AURKA__chr20	12.1183	0.0010528	0.0166366	70	41.664	0.063282
	AURKB__chr17	8.40925	7.97759e-08	0.0101711	0	68.1487	7.8434e-06
	BRCA1__chr17	2.84608	2.49273e-14	0.00566163	60	122.429	4.40285e-12
	BRD8__chr5	4.823	0.0190359	0.0184628	60	37.5428	1.03104
	BTG3__chr21	3.65229	0.0127604	0.0145739	110	47.5609	0.875568
	BUB1__chr2	4.92232	2.77327e-14	0.00892438	80	77.669	3.10753e-12
	BUB1B__chr15	5.89068	0.00332596	0.0146521	90	47.307	0.226995
	BUB3__chr10	25.699	0.0106997	0.0061962	10	111.867	1.72682
	C12orf65__chr12	1.51361	0.00830573	0.0158412	40	43.7558	0.52431
	C18orf54__chr18	2.32871	2.48793e-14	0.00730448	30	94.8934	3.40603e-12
	C2orf69__chr2	3.13328	0.0119319	0.0178405	30	38.8524	0.668806
	C4orf46__chr4	2.57204	0.00648156	0.0104819	10	66.128	0.618356
	CCDC14__chr3	2.46297	0.00654204	0.00788587	0	87.8973	0.82959
	CCDC82__chr11	1.17769	0.0263285	0.0486702	80	14.2417	0.540956
	CCDC85C__chr14	2.18977	0.094594	0.0985787	140	7.03141	0.959579
	CCNA2__chr4	11.207	2.7765e-14	0.0108408	60	63.9387	2.56116e-12
	CCNB1__chr5	8.48902	3.97682e-14	0.00928399	90	74.6605	4.28352e-12
	CCNB2__chr15	10.2546	2.42067e-14	0.00980628	130	70.684	2.46849e-12
	CCNF__chr16	3.81274	0.000937469	0.0143021	10	48.4649	0.0655479
	CDC20__chr1	7.7195	2.69921e-14	0.00956164	100	72.4925	2.82296e-12
	CDC25B__chr20	8.78148	0.00158247	0.0100785	40	68.7745	0.157014
	CDC27__chr17	5.01033	0.00917942	0.00885737	70	78.2565	1.03636
	CDCA2__chr8	3.69177	0.000426818	0.0192533	60	36.0015	0.0221686
	CDCA3__chr12	7.36122	2.42444e-14	0.00875116	90	79.2063	2.77041e-12
	CDCA4__chr14	4.57544	0.0135897	0.012947	0	53.5371	1.04964
	CDCA5__chr11	2.43569	0.000731866	0.013921	50	49.7915	0.0525729
	CDCA8__chr1	7.57385	6.68602e-06	0.0188319	60	36.807	0.000355036
	CDK1__chr10	13.0265	0.0408659	0.0625303	0	11.085	0.653539
	CDK5RAP2__chr9	1.70261	0.00223196	0.0106969	110	64.7991	0.208656
	CDKN1B__chr12	4.12798	0.0803019	0.0360708	10	19.2163	2.22623
	CDKN2C__chr1	6.37414	0.00761289	0.00752527	10	92.1092	1.01164
	CDKN2D__chr19	4.08133	0.0010131	0.0119225	0	58.1379	0.0849739
	CDR2__chr16	2.94179	0.0138921	0.0125124	0	55.397	1.11027
	CENPA__chr2	2.68032	3.67379e-14	0.0149356	50	46.4092	2.45976e-12
	CENPE__chr4	16.3883	0.00490939	0.0175487	90	39.4986	0.279758
	CENPF__chr1	26.1485	3.00472e-14	0.0087155	60	79.5304	3.44755e-12
	CENPK__chr5	2.20716	2.8961e-14	0.0060156	20	115.225	4.81431e-12
	CEP350__chr1	2.40947	0.00737907	0.00970807	40	71.3991	0.760097
	CEP55__chr10	9.89868	3.00185e-14	0.00892302	90	77.6808	3.36416e-12
	CIT__chr12	3.9819	3.05727e-14	0.00807767	80	85.8103	3.78484e-12
	CKAP2__chr13	16.24	0.020238	0.0192324	90	36.0406	1.05229
	CKAP2L__chr2	2.89293	3.96275e-14	0.013202	40	52.5032	3.00163e-12
	CKAP5__chr11	8.56428	0.00976707	0.0103606	100	66.9021	0.942712
	CKS1B__chr1	11.2949	4.13339e-14	0.00497706	40	139.268	8.30489e-12
	CKS2__chr9	17.5696	2.97805e-14	0.00952278	70	72.7883	3.12729e-12
	CMC2__chr16	5.1901	0.000130327	0.00351884	0	196.982	0.037037
	CTCF__chr16	1.87825	0.0167242	0.021844	40	31.7317	0.765621
	DBF4__chr7	2.4906	0.00233044	0.0159622	50	43.4242	0.145997
	DCAF7__chr17	6.31497	0.0523388	0.0208508	10	33.2432	2.51016
	DEPDC1__chr1	6.09968	0.00260161	0.0155211	90	44.6585	0.167618
	DIAPH3__chr13	5.491	3.06244e-14	0.00626883	40	110.571	4.88518e-12
	DIXDC1__chr11	2.79168	0.0110637	0.0150367	60	46.0969	0.73578
	DLGAP5__chr14	5.37571	2.59386e-14	0.0089584	110	77.374	2.89545e-12
	E2F7__chr12	1.86183	0.0139018	0.0252359	0	27.4667	0.550875
	ECT2__chr3	6.01122	0.00271183	0.0134051	90	51.7075	0.202298
	ERCC6L__chrX	1.22186	0.001096	0.019842	60	34.9334	0.0552363
	ESCO2__chr8	1.28193	0.00045521	0.0102299	0	67.757	0.044498
	ESPL1__chr12	2.57062	4.17887e-14	0.0112402	20	61.6668	3.71779e-12
	ETS1__chr11	4.21693	0.00508286	0.00444639	0	155.89	1.14314
	EZH2__chr7	3.33905	0.0119703	0.0154381	100	44.8984	0.775371
	FAM111A__chr11	4.44892	0.00230334	0.00917718	0	75.5295	0.250986
	FAM64A__chr17	2.56284	3.86764e-14	0.0114959	110	60.2952	3.36437e-12
	FAM83D__chr20	8.62321	0.00173621	0.0204882	40	33.8315	0.0847417
	FANCG__chr9	2.05086	2.41142e-09	0.00381414	0	181.731	6.32231e-07
	FANCI__chr15	2.26697	0.00130952	0.00916619	90	75.62	0.142864
	FAS__chr10	1.95203	0.00731014	0.0108351	0	63.9724	0.674673
	FBXO5__chr6	3.2324	0.660202	1.51971	10	0.456105	0.434426
	FOPNL__chr16	4.3172	0.00851845	0.00954843	100	72.5928	0.892131
	FOSL1__chr11	22.1074	0.116925	0.0156513	0	44.2868	7.47063
	FOXM1__chr12	7.85984	3.5314e-14	0.00524425	60	132.173	6.73386e-12
	FZR1__chr19	1.68778	0.0128563	0.0280904	0	24.6756	0.457675
	G2E3__chr14	4.04083	0.00878724	0.0172287	60	40.2321	0.510034
	GEN1__chr2	1.73691	0.00287592	0.0115807	50	59.8538	0.248338
	GINS1__chr20	1.70428	0.00048552	0.00604623	30	114.641	0.0803013
	GTSE1__chr22	4.93955	4.10614e-14	0.0113471	60	61.0856	3.61865e-12
	H1FX__chr3	7.10721	0.0413343	0.0168633	30	41.1038	2.45113
	H2AFX__chr11	5.57675	3.03143e-14	0.00709914	90	97.6382	4.27014e-12
	HIST1H4C__chr6	18.1139	0.263257	0.0845681	0	8.19632	3.11296
	HJURP__chr2	7.50223	0.0040646	0.0250941	40	27.6219	0.161974
	HMGB2__chr4	14.689	0.0079565	0.0146328	80	47.3695	0.543745
	HMMR__chr5	5.01721	2.83203e-14	0.00817181	60	84.8217	3.46561e-12
	HSPA1A__chr6	2.21191	0.0333455	0.0473284	0	14.6455	0.704556
	ISCA2__chr14	2.60661	0.012279	0.0119171	40	58.1638	1.03036
	KBTBD2__chr7	2.07618	0.0310792	0.0418253	60	16.5724	0.743071
	KCTD9__chr8	2.11342	0.00781982	0.0154547	50	44.8502	0.505982
	KIAA1524__chr3	3.03839	2.93156e-14	0.00791983	50	87.5204	3.70155e-12
	KIF11__chr10	8.55349	4.15117e-14	0.0112694	50	61.5073	3.68359e-12
	KIF14__chr1	7.15197	3.23841e-14	0.0124719	70	55.5767	2.59657e-12
	KIF18A__chr11	3.46165	0.00449293	0.0218415	50	31.7353	0.205706
	KIF18B__chr17	2.38774	0.00166487	0.0201937	40	34.3249	0.0824448
	KIF20B__chr10	14.3548	2.60522e-14	0.00937352	60	73.9474	2.77934e-12
	KIF22__chr16	4.24484	4.11796e-14	0.00661916	50	104.718	6.22127e-12
	KIF23__chr15	9.90022	0.00245838	0.0160925	60	43.0727	0.152766
	KIF2C__chr1	5.50653	2.98786e-14	0.0133859	60	51.7819	2.23209e-12
	KIF4A__chrX	2.70001	3.46207e-14	0.0114035	120	60.7838	3.03598e-12
	KIFC1__chr6	2.28434	2.54136e-14	0.0139538	70	49.6746	1.82127e-12
	KLF2__chr19	2.19563	1.05229	1.72918	10	0.400853	0.608551
	KLF6__chr10	10.3305	1.34409	0.443819	10	1.56178	3.02847
	KNSTRN__chr15	5.26331	0.00228227	0.0139662	70	49.6305	0.163415
	KPNA2__chr17	6.76815	0.00103447	0.0105672	40	65.5945	0.0978948
	LINC00704__chr10	5.11416	0.0186609	0.0122109	0	56.7644	1.52821
	LMO4__chr1	4.10728	0.030168	0.026159	60	26.4974	1.15325
	LOC100288637__chr15	2.0434	0.00675846	0.0312396	50	22.1881	0.216343
	LPAR1__chr9	3.70055	0.04238	0.0232323	40	29.8355	1.82418
	LRR1__chr14	2.30776	3.00432e-14	0.00501686	50	138.164	5.98846e-12
	MAD2L1__chr4	4.64732	2.91292e-14	0.0088199	110	78.589	3.30267e-12
	MCM8__chr20	1.28302	0.00247647	0.0109953	120	63.0404	0.22523
	MELK__chr9	6.77395	3.14815e-14	0.00782462	20	88.5854	4.02339e-12
	MESDC1__chr15	1.62409	0.00328753	0.011328	40	61.1889	0.290213
	MGME1__chr20	1.68101	0.00690431	0.0142306	60	48.7084	0.485175
	MICB__chr6	1.82308	0.00631188	0.00956101	0	72.4973	0.660169
	MIS18BP1__chr14	3.8564	0.0054801	0.0114015	60	60.7944	0.480647
	MKI67__chr10	38.4319	3.29469e-14	0.0086002	60	80.5967	3.83095e-12
	MLF1IP__chr4	3.93227	1.64799e-13	0.0040304	0	171.98	4.08892e-11
	MND1__chr4	2.0622	2.27381e-09	0.00479816	0	144.461	4.73893e-07
	MXD3__chr5	1.61373	9.721e-05	0.00992131	0	69.8645	0.0097981
	MYBL1__chr8	2.46587	0.0248996	0.0342862	60	20.2165	0.72623
	NAV2__chr11	5.62013	0.0177991	0.0202383	60	34.2492	0.879474
	NAV3__chr12	1.66723	0.179759	0.225836	60	3.06924	0.795968
	NCAPD3__chr11	2.23053	0.000402141	0.00485632	0	142.731	0.0828078
	NCAPG__chr4	4.45906	3.3464e-14	0.0111381	60	62.2321	3.00446e-12
	NCAPH__chr2	2.97736	3.67324e-14	0.0113055	40	61.3104	3.24906e-12
	NDC80__chr18	5.84134	2.7552e-14	0.0116969	60	59.2592	2.3555e-12
	NDE1__chr16	1.86381	0.00525634	0.0203531	60	34.056	0.258257
	NEDD1__chr12	2.53316	0.00103484	0.00421954	0	164.271	0.245249
	NEK2__chr1	5.99301	3.99517e-14	0.00916566	70	75.6244	4.35885e-12
	NIF3L1__chr2	1.39248	0.00472594	0.0151571	90	45.7307	0.311796
	NUF2__chr1	4.60697	2.57562e-14	0.0103731	50	66.8218	2.48298e-12
	NUP205__chr7	2.2745	1.21374e-07	0.00320254	0	216.437	3.78994e-05
	NUP50__chr22	4.08698	0.00515669	0.00873506	90	79.3523	0.590344
	NUP62__chr19	5.90948	0.000764461	0.00324926	0	213.324	0.235272
	NUPL1__chr13	2.54426	0.00318745	0.00720958	60	96.1425	0.442114
	NUSAP1__chr15	12.3122	2.85338e-14	0.00686463	30	100.974	4.15665e-12
	ORC6__chr16	2.37689	0.00323606	0.0119024	60	58.236	0.271884
	PAX6__chr11	3.60994	0.0151891	0.0128508	0	53.9381	1.18196
	PBK__chr8	3.18724	3.79204e-14	0.0116061	120	59.7225	3.26727e-12
	PCF11__chr11	1.61499	0.00802243	0.0194713	70	35.5984	0.412013
	PCNT__chr21	2.47725	0.0037635	0.00826053	60	83.9107	0.4556
	PHF17__chr4	3.45463	0.0220867	0.0212691	0	32.5894	1.03844
	PHF19__chr9	5.02705	2.59143e-14	0.00610841	110	113.474	4.24239e-12
	PIF1__chr15	1.27303	4.3009e-14	0.0172515	10	40.1789	2.49306e-12
	PILRB__chr7	1.31806	0.0176651	0.0335687	40	20.6486	0.526235
	PIM3__chr22	1.60859	0.0153312	0.0257979	30	26.8683	0.59428
	PLEKHO1__chr1	1.35836	0.025018	0.0374306	90	18.5182	0.668385
	PLK1__chr16	14.5819	3.0541e-14	0.00916698	60	75.6134	3.33163e-12
	PMP22__chr17	3.14297	0.0152338	0.0134768	40	51.4325	1.13037
	POC1A__chr3	1.42409	0.00123899	0.0112575	110	61.5719	0.110059
	POLQ__chr3	1.25518	0.00135166	0.0135333	50	51.2178	0.0998766
	PRC1__chr15	18.8643	3.09964e-14	0.00785828	90	88.206	3.94443e-12
	PRDM8__chr4	2.05846	0.00380619	0.00953201	0	72.7178	0.399306
	PRR11__chr17	10.9817	2.39742e-14	0.0075347	110	91.994	3.18185e-12
	PSD3__chr8	3.63565	0.109618	0.0491991	40	14.0886	2.22805
	PSRC1__chr1	4.10819	0.00207521	0.0151676	60	45.6992	0.136818
	RACGAP1__chr12	12.8255	2.86926e-14	0.00832554	60	83.2556	3.44633e-12
	RAD21__chr8	12.1128	0.0176896	0.0090824	100	76.3176	1.94768
	RAD51AP1__chr12	2.86091	3.41452e-14	0.00818688	20	84.6656	4.17072e-12
	RBBP8__chr18	2.218	0.00319428	0.00686221	0	101.009	0.465489
	RFC3__chr13	3.04248	0.00194101	0.00710532	50	97.5533	0.273177
	RFWD3__chr16	5.71282	0.0207188	0.0164373	90	42.1692	1.26047
	RHNO1__chr12	3.06905	0.00306855	0.00830371	50	83.4744	0.36954
	RPP30__chr10	2.63209	0.000835353	0.00303247	10	228.575	0.275469
	RRM2__chr2	19.6395	3.96191e-14	0.00839513	90	82.5654	4.7193e-12
	RTKN2__chr10	1.94896	0.00143194	0.0116564	0	59.4648	0.122845
	SAC3D1__chr11	2.30872	6.5818e-10	0.00439672	0	157.651	1.49698e-07
	SAP130__chr2	2.16572	0.00396532	0.00882113	70	78.5781	0.449525
	SERTAD2__chr2	1.73831	0.0149816	0.0247263	50	28.0328	0.605899
	SETD8__chr12	3.27015	0.00549431	0.00793752	40	87.3255	0.692195
	SGOL1__chr3	2.00569	0.00138531	0.0178709	60	38.7864	0.0775177
	SGOL2__chr2	4.51149	2.83882e-14	0.0126265	60	54.8962	2.2483e-12
	SHCBP1__chr16	4.24516	2.52297e-14	0.00912625	90	75.9509	2.76452e-12
	SKA1__chr18	1.51198	3.73749e-14	0.00981354	30	70.6317	3.8085e-12
	SKA3__chr13	2.52246	0.00177661	0.0108116	30	64.1115	0.164325
	SMC2__chr9	5.2762	3.47985e-14	0.00517046	60	134.059	6.73026e-12
	SMC4__chr3	24.0109	0.00139468	0.00683974	60	101.341	0.203908
	SOGA1__chr20	3.27221	0.0264195	0.0266976	50	25.9629	0.989583
	SPAG5__chr17	3.38011	3.0717e-14	0.00843258	70	82.1987	3.64266e-12
	SPC25__chr2	3.4249	4.29118e-14	0.010794	90	64.2158	3.97551e-12
	SPDL1__chr5	4.85488	0.00720145	0.0123094	60	56.3103	0.585036
	SRGAP1__chr12	3.57297	0.947938	0.549697	60	1.26096	1.72448
	STIL__chr1	2.40716	0.000328296	0.011546	40	60.0334	0.0284337
	STK17B__chr2	1.99609	0.0254287	0.0282051	0	24.5753	0.901563
	SUV39H1__chrX	1.92331	0.00090151	0.0091794	50	75.5112	0.0982101
	TACC3__chr4	11.1029	3.31509e-14	0.00845015	60	82.0278	3.92312e-12
	TBC1D2__chr9	2.70976	0.0260002	0.0214945	0	32.2477	1.20962
	TCF19__chr6	3.14969	0.00053134	0.00655531	0	105.738	0.0810548
	TDP1__chr14	1.78979	0.00486716	0.012739	90	54.4114	0.382068
	TEX30__chr13	2.29731	3.09364e-14	0.00545994	50	126.951	5.66607e-12
	TGIF1__chr18	2.72946	0.0286512	0.026409	0	26.2466	1.0849
	TJP2__chr9	1.99423	1.46485e-08	0.00318093	0	217.907	4.60509e-06
	TM4SF1__chr3	21.1835	0.0542607	0.00583016	30	118.89	9.30691
	TMEM138__chr11	2.48982	3.98749e-14	0.00428999	10	161.573	9.29487e-12
	TMEM194A__chr12	1.78386	0.00152082	0.0104262	90	66.4811	0.145865
	TMEM48__chr1	3.8958	2.90433e-14	0.00593072	50	116.874	4.89709e-12
	TMPO__chr12	18.4854	2.61303e-14	0.00574534	50	120.645	4.54808e-12
	TMPO-AS1__chr12	1.51525	0.00174854	0.0104152	10	66.5517	0.167884
	TNFAIP8L1__chr19	2.11373	0.00946593	0.0333958	90	20.7555	0.283447
	TOP2A__chr17	26.9341	0.0335442	0.0211476	0	32.7766	1.58619
	TPX2__chr20	11.3952	3.87765e-14	0.00916278	100	75.6481	4.23196e-12
	TRIM59__chr3	2.22622	0.0057423	0.0235501	60	29.4328	0.243833
	TROAP__chr12	14.1861	0.0232892	0.0250011	50	27.7247	0.931528
	TTK__chr6	3.68235	0.00241603	0.0240327	60	28.8419	0.100531
	TUBA1C__chr12	63.5133	2.6571e-08	0.0036075	0	192.141	7.36549e-06
	UBALD2__chr17	4.02201	0.0164083	0.0193117	80	35.8927	0.849658
	UBE2C__chr20	17.7221	0.0481062	0.0344685	0	20.1096	1.39566
	UBE2T__chr1	4.96052	3.47306e-14	0.00698552	40	99.2262	4.9718e-12
	USP1__chr1	3.51337	2.53911e-14	0.00417196	10	166.144	6.08612e-12
	VANGL1__chr1	2.2827	0.0087705	0.0123841	60	55.9705	0.708204
	WEE1__chr11	5.38831	0.0276786	0.0217807	40	31.8239	1.27079
	WHSC1__chr4	7.76082	2.4298e-14	0.0039515	40	175.414	6.14906e-12
	WSB1__chr17	4.4937	0.218304	0.0914087	60	7.58294	2.38821
	YWHAH__chr22	7.7536	2.85389e-14	0.00380287	60	182.269	7.50456e-12
	ZWINT__chr10	5.62835	3.08903e-14	0.0066115	30	104.84	4.6722e-12
