# Supplementary material for: Time-resolved single-cell sequencing identifies multiple waves of mRNA decay during the mitosis-to-G1 phase transition
Source: eLife. 2022 Feb 1;11:e71356. doi: 10.7554/eLife.71356 (PMC8806192; doi:10.7554/eLife.71356)
Supplement: Supplementary file 2. — This file contains sample sizes for all experiments that involved single-cell analyses. [file elife-71356-supp2.xlsx]

## Sheet: Fig. 2D-F & S2B-C
	Fig. 2D-F and Supplemental Fig. 2B-C: TOP2A and CDK1 mRNA counts throughout mitosis.
		# of cells
		Prophase	Prometaphase	Metaphase	Anaphase	Telophase
	Experiment 1	21	16	20	15	18
	Experiment 2*	18	16	20	15	18
	Experiment 3	20	31	19	15	23
	* Shown in Figure S2B-C

## Sheet: Fig. 4A & S4C-D
	Fig. 4A and Supplemental Fig. 4C-D: TOP2A and CDK1 mRNA counts in control and CNOT1-depleted cells in early versus late mitosis.
		# of cells
	siLUCIFERASE	Pre-Anaphase total	Telophase
	Experiment 1	22	21
	Experiment 2	33	23
	Experiment 3*	34	21
		# of cells
	siCNOT1	Pre-Anaphase total	Telophase
	Experiment 1	21	21
	Experiment 2	17	8
	Experiment 3*	38	29
	* Shown in Figure S4C-D

## Sheet: Fig. S1B
	Supplemental Figure 1B: Quantification of FUCCI fluorescence markers as cells progress from Mitotis into G1 phase.
		# of Mitotic cells fluorescence of both daughters was quantified	# of daugher cells included
	Experiment 1	15	30
	Experiment 2	15	30
	Experiment 3	15	30

## Sheet: Fig. S2K
	Supplemental Fig. 2K: Quantification of G1 duration in RPE-FUCCI Wild-type and p53 knock-out cells.
		# of cells
		Wild-Type	p53 Knock-out
	Experiment 1	38	36
	Experiment 2	40	40

## Sheet: Fig. S2L
	Supplemental Figure 2L: Quantification of FUCCI-G1 fluorescence in RPE-FUCCI Wild-type and p53 knock-out cells.
	RPE-FUCCI wild-type
		# of Mitotic cells	# of daugher cells included
	Experiment 1	10	18
	Experiment 2	10	20
	Experiment 3	10	20
	RPE-FUCCI p53 Knock-out
		# of Mitotic cells	# of daugher cells included
	Experiment 1	10	20
	Experiment 2	10	20
	Experiment 3	10	20

## Sheet: Fig. S4G
	Supplemental Fig. 4G: Quantification of FUCCI-G1 fluorescence in RPE-FUCCI CRISPRi cells infected with control- or CNOT1-targeting sgRNAs.
	RPE-FUCCI CRISPRi cells with Non-Target sgRNA
		# of Mitotic cells	# of daugher cells included
	Experiment 1	8	16
	Experiment 2	8	16
	Experiment 3	10	19
	RPE-FUCCI CRISPRi cells with CNOT1 sgRNA #1
		# of Mitotic cells	# of daugher cells included
	Experiment 1	8	16
	Experiment 2	9	17
	Experiment 3	9	18
	RPE-FUCCI CRISPRi cells with CNOT1 sgRNA #3
		# of Mitotic cells	# of daugher cells included
	Experiment 1	8	16
	Experiment 2	8	15
	Experiment 3	8	16
