# Supplementary material for: Time-resolved single-cell sequencing identifies multiple waves of mRNA decay during the mitosis-to-G1 phase transition
Source: eLife. 2022 Feb 1;11:e71356. doi: 10.7554/eLife.71356 (PMC8806192; doi:10.7554/eLife.71356)
Supplement: Supplementary file 3. — This file contains nucleotide sequences for reagents that were used in this study; RT-qPCR primer sequences and sgRNA sequences. [file elife-71356-supp3.xlsx]

## Sheet: RT-qPCR primer sequences
Gene	RT-qPCR Forward Primer (5' - 3')	RT-qPCR Reverse Primer (5' - 3')
GAPDH	CACCGTCAAGGCTGAGAACGGG	GGTGAAGACGCCAGTGGACTCC
RPN1	GAGGGCTCTGATCTGTGCGACAG	GCCAGCCACCAGGCGCTCAG
CDK1	CTATCCCTCCTGGTCAGTACATGG	CTCTGGCAAGGCCAAAATCAGCCAG
TOP2A	GTCTCTCAAAAGCCTGATCCTGCC	GTCATCACTCTCCCCCTTGGATTTC
UBE2C	GATGTCAGGACCATTCTGCTCTCC	GCTCCTGGCTGGTGACCTGC
FBXO5	GATCCTAGAAGATGATAAGGGGG	CACCTTGATTGGATAACTTGGTT
FZR1	GCACGCCAACGAGCTGGTGAGC	CAGACACAGACTCCCACTTTACC
ARL6IP1	CTACCTTGTTCCCATTCTAGCGCC	GGCGTTTCCACCAACCCACAGC
CENPA	GCCCTATTGGCCCTACAAGAGGC	GGCTCTGGAGAGTCCCCGG
PSD3	CTTAAAACTGCCGACTGGAGGGTC	CTTCAGTTGCTCCTCCTGAGACAG
UBALD2	CGGCCGACCAGGCGAAGCAG	CAGCGCATCGGGGAAGTTGGG
SRGAP1	GGCAGCCTGACCAACATCAGCCG	GGGGCATGCTTTGCTGTGCTCTG
CNOT1	GTAGTGCCCTTTGTTGCCAAAG	GGAGGTTTCCAGGTTTTAGCTC
CDKN1a	GCACCTCACCTGCTCTGCTGC	CCTCTTGGAGAAGATCAGCCGG

## Sheet: guideRNA sequences
Target	sgRNA sequence (5'-3')	Used for
Control (non-targeting)	GCTGCGCTCCGAGCAACCAC	CRISPRi
CNOT1 (#1)	GCTCCGGGAAACGCTTCCAG	CRISPRi
CNOT1 (#2)	GCGGAGCTCTAGGGAGTGAG	CRISPRi
CNOT1 (#3)	GGCGGAGTTAACCGAAGAGG	CRISPRi
TP53	UCGACGCUAGGAUCUGACUG	CRISPR/Cas9-mediated knock-out
